# Supplementary material for: Evolutionary history of Carnivora (Mammalia, Laurasiatheria) inferred from mitochondrial genomes
Source: PubMed Central journal article supplement (PMC7886153; doi:10.1371/journal.pone.0240770), 2021-02-16
Supplement: pone.0240770.s001.pdf [file pone.0240770.s001.pdf]

**S1 Appendix. Origin of the sequences used in this study** (taxon names follow the classification of the IUCN, 2020)

**Evolutionary history of Carnivora (Mammalia, Laurasiatheria) inferred from mitochondrial genomes**

Alexandre Hassanin<sup>1\*</sup>, Géraldine Veron<sup>1</sup>, Anne Ropiquet<sup>2</sup>, Bettine Jansen van Vuuren<sup>3</sup>, Alexis Lécuyer<sup>4</sup>, Steven M. Goodman<sup>5</sup>, Jibril Haider<sup>1,6,7</sup>, Trung Thanh Nguyen<sup>1</sup>

<sup>1</sup> Institut de Systématique, Évolution, Biodiversité (ISYEB), Sorbonne Université, MNHN, CNRS, EPHE, UA, Paris.

<sup>2</sup> Department of Natural Sciences, Faculty of Science and Technology, Middlesex University, United Kingdom.

<sup>3</sup> Centre for Ecological Genomics and Wildlife Conservation, Department of Zoology, University of Johannesburg, South Africa.

<sup>4</sup> Parc zoologique de Paris, Muséum national d'Histoire naturelle, Paris.

<sup>5</sup> Field Museum of Natural History, Chicago, IL, USA.

<sup>6</sup> Department of Wildlife Management, Pir Mehr Ali Shah, Arid Agriculture University Rawalpindi, Pakistan.

<sup>7</sup> Forest Parks & Wildlife Department Gilgit-Baltistan, Pakistan.

\* Correspondence: [alexandre.hassanin@mnhn.fr](mailto:alexandre.hassanin@mnhn.fr)

| Clade      | Family      | Subfamily        | Genus                | Species               | subspecies           | Voucher                                           | DNA sequencing               | Accession number | Number of genomes |
|------------|-------------|------------------|----------------------|-----------------------|----------------------|---------------------------------------------------|------------------------------|------------------|-------------------|
| OUTGROUP   | Tapiridae   |                  | <i>Tapirus</i>       | <i>terrestris</i>     |                      | T358 = # 4020 Zoo de La Palmyre                   | Sanger (overlapping PCRs)    | MW257204         | 1                 |
| OUTGROUP   | Manidae     |                  | <i>Phataginus</i>    | <i>tricuspis</i>      |                      |                                                   |                              | NC 026780        | 1                 |
| Feliformia | Felidae     | Felinae          | <i>Acinonyx</i>      | <i>jubatus</i>        |                      |                                                   |                              | NC 005212        | 3                 |
| Caniformia | Ursidae     | Ailuropodinae    | <i>Ailuropoda</i>    | <i>melanoleuca</i>    |                      |                                                   |                              | NC 009492        | 5                 |
| Caniformia | Ailuridae   |                  | <i>Ailurus</i>       | <i>fulgens</i>        |                      |                                                   |                              | NC 011124        | 1                 |
| Caniformia | Ailuridae   |                  | <i>Ailurus</i>       | <i>fulgens</i>        | <i>styani</i>        |                                                   |                              | NC 009691        | 1                 |
| Caniformia | Mustelidae  | Lutrinae         | <i>Aonyx</i>         | <i>cinerea</i>        |                      |                                                   |                              | NC 035814        | 2                 |
| Feliformia | Viverridae  | Paradoxurinae    | <i>Arctictis</i>     | <i>binturong</i>      |                      | T605 = MNHN TC28; NMS RL78/97                     | Sanger (overlapping PCRs)    | MW257218         | 2                 |
| Caniformia | Otariidae   |                  | <i>Arctocephalus</i> | <i>australis</i>      |                      |                                                   |                              | MG023139         | 1                 |
| Caniformia | Otariidae   |                  | <i>Arctocephalus</i> | <i>forsteri</i>       |                      |                                                   |                              | KT693377         | 17                |
| Caniformia | Otariidae   |                  | <i>Arctocephalus</i> | <i>forsteri</i>       |                      |                                                   |                              | NC 004023        | 28                |
| Caniformia | Otariidae   |                  | <i>Arctocephalus</i> | <i>gazella</i>        |                      |                                                   |                              | BK10918          | 1                 |
| Caniformia | Otariidae   |                  | <i>Arctocephalus</i> | <i>pusillus</i>       |                      |                                                   |                              | NC 008417        | 1                 |
| Caniformia | Otariidae   |                  | <i>Arctocephalus</i> | <i>townsendi</i>      |                      |                                                   |                              | NC 008420        | 1                 |
| Caniformia | Ursidae     | Tremarctinae     | <i>Arctodus</i>      | <i>simus</i>          |                      |                                                   |                              | NC 011116        | 1                 |
| Caniformia | Mustelidae  | Melinae          | <i>Arctonyx</i>      | <i>collaris</i>       |                      |                                                   |                              | NC 020645        | 1                 |
| Caniformia | Ursidae     | Tremarctinae     | <i>Arctotherium</i>  | sp.                   |                      |                                                   |                              | NC 030174        | 1                 |
| Feliformia | Herpestidae | Herpestinae      | <i>Atilax</i>        | <i>paludinosus</i>    |                      | T606 = MNHN TC59                                  | Sanger (overlapping PCRs)    | MW257238         | 1                 |
| Caniformia | Procyonidae |                  | <i>Bassaricyon</i>   | <i>neblina</i>        |                      |                                                   |                              | SRX1097850*      | 1                 |
| Caniformia | Procyonidae |                  | <i>Bassariscus</i>   | <i>sumichrasti</i>    |                      |                                                   |                              | SRX1099089*      | 1                 |
| Feliformia | Herpestidae | Herpestinae      | <i>Bdeogale</i>      | <i>nigripes</i>       |                      | GLC15, Gabon                                      | Sanger (overlapping PCRs)    | MW257221         | 1                 |
| Caniformia | Otariidae   |                  | <i>Callorhinus</i>   | <i>ursinus</i>        |                      |                                                   |                              | NC 008415        | 1                 |
| Caniformia | Canidae     |                  | <i>Canis</i>         | <i>adustus</i>        |                      |                                                   |                              | KT448271         | 1                 |
| Caniformia | Canidae     |                  | <i>Canis</i>         | <i>anthus</i>         |                      |                                                   |                              | NC 027956        | 2                 |
| Caniformia | Canidae     |                  | <i>Canis</i>         | <i>aureus</i>         |                      |                                                   |                              | KT448274         | 1                 |
| Caniformia | Canidae     |                  | <i>Canis</i>         | <i>latrans</i>        |                      |                                                   |                              | NC 008093        | 7                 |
| Caniformia | Canidae     |                  | <i>Canis</i>         | <i>lupus</i>          | <i>chanco</i>        |                                                   |                              | NC 010340        | 4                 |
| Caniformia | Canidae     |                  | <i>Canis</i>         | <i>lupus</i>          | <i>familiaris</i>    |                                                   |                              | NC 002008        | 1231              |
| Caniformia | Canidae     |                  | <i>Canis</i>         | <i>mesomelas</i>      |                      |                                                   |                              | KT448280         | 1                 |
| Feliformia | Felidae     | Felinae          | <i>Caracal</i>       | <i>caracal</i>        |                      |                                                   |                              | NC 028306        | 1                 |
| Feliformia | Felidae     | Felinae          | <i>Catopuma</i>      | <i>badia</i>          |                      |                                                   |                              | NC 028300        | 1                 |
| Feliformia | Felidae     | Felinae          | <i>Catopuma</i>      | <i>temminckii</i>     |                      |                                                   |                              | NC 027115        | 41                |
| Feliformia | Viverridae  | Hemigalinae      | <i>Chrotogale</i>    | <i>owstoni</i>        |                      | T607 = MNHN SH4                                   | Sanger (overlapping PCRs)    | MW257222         | 1                 |
| Caniformia | Canidae     |                  | <i>Chrysocyon</i>    | <i>brachyurus</i>     |                      |                                                   |                              | NC 024172        | 1                 |
| Caniformia | Viverridae  | Viverrinae       | <i>Civettictis</i>   | <i>civetta</i>        |                      | GLC19, Gabon                                      | Sanger (overlapping PCRs)    | MW257217         | 1                 |
| Feliformia | Viverridae  | Viverrinae       | <i>Civettictis</i>   | <i>civetta</i>        |                      |                                                   |                              | NC 033378        | 1                 |
| Caniformia | Mephitidae  |                  | <i>Conepatus</i>     | <i>chinga</i>         |                      |                                                   |                              | NC 042596        | 1                 |
| Feliformia | Hyenidae    |                  | <i>Crocuta</i>       | <i>crocuta</i>        |                      |                                                   |                              | NC 020670        | 3                 |
| Feliformia | Herpestidae | Mungotinae       | <i>Crossarchus</i>   | <i>platycephalus</i>  |                      | C7R66, Cameroon                                   | Sanger (overlapping PCRs)    | MW257212         | 1                 |
| Feliformia | Eupleridae  | Euplerinae       | <i>Cryptoprocta</i>  | <i>ferox</i>          |                      | MNHN C13; Univ Montpellier T-832; Studbook # 0008 | Sanger (overlapping PCRs)    | MW257203         | 1                 |
| Caniformia | Canidae     |                  | <i>Cuon</i>          | <i>alpinus</i>        |                      |                                                   |                              | NC 013445        | 3                 |
| Feliformia | Herpestidae | Herpestinae      | <i>Cynictis</i>      | <i>penicillata</i>    |                      | T375 = SUN-227 Botswana                           | Sanger (overlapping PCRs)    | MW257211         | 1                 |
| Feliformia | Viverridae  | Hemigalinae      | <i>Cynogale</i>      | <i>bennetti</i>       |                      |                                                   |                              | KY117544         | 1                 |
| Caniformia | Phocidae    |                  | <i>Cystophora</i>    | <i>cristata</i>       |                      |                                                   |                              | NC 008427        | 1                 |
| Feliformia | Viverridae  | Hemigalinae      | <i>Diplogale</i>     | <i>hosei</i>          |                      |                                                   |                              | MH464790         | 1                 |
| Caniformia | Mustelidae  | Lutrinae         | <i>Enhydra</i>       | <i>lutris</i>         |                      |                                                   |                              | NC 009692        | 1                 |
| Caniformia | Phocidae    |                  | <i>Eriagnathus</i>   | <i>barbatus</i>       |                      |                                                   |                              | NC 008426        | 1                 |
| Caniformia | Otariidae   |                  | <i>Eumetopias</i>    | <i>jubatus</i>        |                      |                                                   |                              | NC 004030        | 10                |
| Feliformia | Eupleridae  | Euplerinae       | <i>Eupleres</i>      | <i>goudotii</i>       |                      | D128; MNHN TC705; RHT062; UADBA 50125 Madagascar  | Sanger (overlapping PCRs)    | MW257202         | 1                 |
| Feliformia | Felidae     | Felinae          | <i>Felis</i>         | <i>catus</i>          |                      |                                                   |                              | NC 001700        | 1                 |
| Feliformia | Felidae     | Felinae          | <i>Felis</i>         | <i>chaus</i>          |                      |                                                   |                              | NC 028307        | 1                 |
| Feliformia | Felidae     | Felinae          | <i>Felis</i>         | <i>margarita</i>      |                      |                                                   |                              | NC 028308        | 1                 |
| Feliformia | Felidae     | Felinae          | <i>Felis</i>         | <i>nigripes</i>       |                      |                                                   |                              | NC 028309        | 1                 |
| Feliformia | Felidae     | Felinae          | <i>Felis</i>         | <i>silvestris</i>     | <i>lybica</i>        |                                                   |                              | KP202275         | 3                 |
| Feliformia | Eupleridae  | Euplerinae       | <i>Fossa</i>         | <i>fossana</i>        |                      | D350; FMNH 171893 Madagascar                      | illumina (shotgun) MRD = 16  | MW257201         | 1                 |
| Feliformia | Herpestidae | Herpestinae      | <i>Galerella</i>     | <i>sanguinea</i>      |                      | T378 = SUN-272 South Africa                       | Sanger (overlapping PCRs)    | MW257224         | 1                 |
| Caniformia | Mustelidae  | Galictinae       | <i>Galictis</i>      | <i>vittata</i>        |                      | T412 = TCCV 1997.137 French Guiana                | Sanger (overlapping PCRs)    | MW257225         | 1                 |
| Feliformia | Eupleridae  | Galidiinae       | <i>Galidia</i>       | <i>elegans</i>        |                      | D146; FMNH 173102 Madagascar                      | illumina (shotgun) MRD = 139 | MW257200         | 1                 |
| Feliformia | Eupleridae  | Galidiinae       | <i>Galidictis</i>    | <i>fasciata</i>       |                      | D333; FMNH 156652 Madagascar                      | illumina (shotgun) MRD = 124 | MW257199         | 1                 |
| Feliformia | Viverridae  | Viverrinae       | <i>Genetta</i>       | <i>abyssinica</i>     |                      |                                                   |                              | MG489822         | 1                 |
| Feliformia | Viverridae  | Viverrinae       | <i>Genetta</i>       | <i>genetta</i>        |                      | T297 = MNHN SPOT-1479-MNHN-ZM-2004-298, France    | Sanger (overlapping PCRs)    | MW257215         | 1                 |
| Feliformia | Viverridae  | Viverrinae       | <i>Genetta</i>       | <i>servalina</i>      |                      |                                                   |                              | NC 024568        | 2                 |
| Caniformia | Mustelidae  | Martinae         | <i>Gulo</i>          | <i>gulo</i>           |                      |                                                   |                              | NC 009685        | 3                 |
| Caniformia | Phocidae    |                  | <i>Halichoerus</i>   | <i>grypus</i>         |                      |                                                   |                              | NC 001602        | 2                 |
| Caniformia | Ursidae     | Ursinae          | <i>Helarctos</i>     | <i>malayanus</i>      |                      |                                                   |                              | NC 009968        | 2                 |
| Feliformia | Herpestidae | Mungotinae       | <i>Helogale</i>      | <i>parvula</i>        |                      |                                                   |                              | SRR7637809*      | 1                 |
| Feliformia | Viverridae  | Hemigalinae      | <i>Hemigalus</i>     | <i>derbyanus</i>      |                      |                                                   |                              | MH464791         | 1                 |
| Feliformia | Herpestidae | Herpestinae      | <i>Herpestes</i>     | <i>brachyurus</i>     |                      |                                                   |                              | KY117547         | 1                 |
| Feliformia | Herpestidae | Herpestinae      | <i>Herpestes</i>     | <i>javanicus</i>      |                      |                                                   |                              | NC 006835        | 1                 |
| Feliformia | Herpestidae | Herpestinae      | <i>Herpestes</i>     | <i>javanicus</i>      |                      | T413 = MNHN VV 1999.510, Thailand                 | Sanger (overlapping PCRs)    | MW257214         | 1                 |
| Feliformia | Herpestidae | Herpestinae      | <i>Herpestes</i>     | <i>naso</i>           |                      | C7R110 Cameroon                                   | Sanger (overlapping PCRs)    | MW257235         | 1                 |
| Feliformia | Herpestidae | Herpestinae      | <i>Herpestes</i>     | <i>semitorquatus</i>  |                      |                                                   |                              | MH464789         | 1                 |
| Feliformia | Felidae     | Machairodontinae | <i>Homotherium</i>   | <i>latidens</i>       |                      |                                                   |                              | MF871702         | 3                 |
| Feliformia | Hyenidae    |                  | <i>Hyaena</i>        | <i>hyaena</i>         |                      |                                                   |                              | NC 020669        | 1                 |
| Caniformia | Phocidae    |                  | <i>Hydrurga</i>      | <i>leptonyx</i>       |                      |                                                   |                              | NC 008425        | 1                 |
| Feliformia | Herpestidae | Herpestinae      | <i>Ichneumia</i>     | <i>albicauda</i>      |                      | T603 = DM1100 TC-157, South Africa                | Sanger (overlapping PCRs)    | MW257213         | 1                 |
| Caniformia | Mustelidae  | Galictinae       | <i>Ictonyx</i>       | <i>striatus</i>       |                      | T299 = MNHN SPOT-6901 South Africa                | Sanger (overlapping PCRs)    | MW257237         | 1                 |
| Feliformia | Felidae     | Felinae          | <i>Leopardus</i>     | <i>colocolo</i>       |                      |                                                   |                              | NC 028314        | 1                 |
| Feliformia | Felidae     | Felinae          | <i>Leopardus</i>     | <i>geoffroyi</i>      |                      |                                                   |                              | NC 028320        | 1                 |
| Feliformia | Felidae     | Felinae          | <i>Leopardus</i>     | <i>guigna</i>         |                      |                                                   |                              | NC 028321        | 1                 |
| Feliformia | Felidae     | Felinae          | <i>Leopardus</i>     | <i>jacobita</i>       |                      |                                                   |                              | NC 028322        | 1                 |
| Feliformia | Felidae     | Felinae          | <i>Leopardus</i>     | <i>pardalis</i>       |                      |                                                   |                              | NC 028315        | 1                 |
| Feliformia | Felidae     | Felinae          | <i>Leopardus</i>     | <i>pardalis</i>       | <i>mitis</i>         | T262 = MNHN SPOT-4119 French Guiana               | Sanger (overlapping PCRs)    | MW257208         | 1                 |
| Feliformia | Felidae     | Felinae          | <i>Leopardus</i>     | <i>tigrinus</i>       |                      |                                                   |                              | NC 028317        | 1                 |
| Feliformia | Felidae     | Felinae          | <i>Leopardus</i>     | <i>wiedii</i>         |                      |                                                   |                              | NC 028318        | 1                 |
| Feliformia | Felidae     | Felinae          | <i>Leptailurus</i>   | <i>serval</i>         |                      |                                                   |                              | NC 028316        | 1                 |
| Caniformia | Phocidae    |                  | <i>Leptonychotes</i> | <i>weddellii</i>      |                      |                                                   |                              | NC 008424        | 1                 |
| Caniformia | Phocidae    |                  | <i>Lobodon</i>       | <i>carcinophaga</i>   |                      |                                                   |                              | NC 008423        | 1                 |
| Caniformia | Mustelidae  | Lutrinae         | <i>Lontra</i>        | <i>canadensis</i>     |                      |                                                   |                              | SRR10409165*     | 1                 |
| Caniformia | Mustelidae  | Lutrinae         | <i>Lutra</i>         | <i>lutra</i>          |                      |                                                   |                              | LC050126         | 1                 |
| Caniformia | Mustelidae  | Lutrinae         | <i>Lutra</i>         | <i>lutra</i>          |                      |                                                   |                              | NC 011358        | 9                 |
| Caniformia | Mustelidae  | Lutrinae         | <i>Lutra</i>         | <i>sumatrana</i>      |                      |                                                   |                              | NC 035810        | 1                 |
| Caniformia | Mustelidae  | Lutrinae         | <i>Lutrogale</i>     | <i>perspicillata</i>  |                      |                                                   |                              | NC 035811        | 1                 |
| Caniformia | Canidae     |                  | <i>Lycalopex</i>     | <i>sechurae</i>       |                      |                                                   |                              | KT448284         | 1                 |
| Caniformia | Canidae     |                  | <i>Lycan</i>         | <i>pictus</i>         |                      |                                                   |                              | NC 028427        | 2                 |
| Feliformia | Felidae     | Felinae          | <i>Lynx</i>          | <i>canadensis</i>     |                      |                                                   |                              | NC 028313        | 1                 |
| Feliformia | Felidae     | Felinae          | <i>Lynx</i>          | <i>lynx</i>           |                      |                                                   |                              | NC 027083        | 4                 |
| Feliformia | Felidae     | Felinae          | <i>Lynx</i>          | <i>pardinus</i>       |                      |                                                   |                              | NC 028319        | 161               |
| Feliformia | Felidae     | Felinae          | <i>Lynx</i>          | <i>rufus</i>          |                      |                                                   |                              | NC 014456        | 3                 |
| Caniformia | Mustelidae  | Martinae         | <i>Martes</i>        | <i>americana</i>      |                      |                                                   |                              | NC 020642        | 1                 |
| Caniformia | Mustelidae  | Martinae         | <i>Martes</i>        | <i>flavigula</i>      |                      |                                                   |                              | NC 012141        | 3                 |
| Caniformia | Mustelidae  | Martinae         | <i>Martes</i>        | <i>foina</i>          |                      |                                                   |                              | NC 020643        | 1                 |
| Caniformia | Mustelidae  | Martinae         | <i>Martes</i>        | <i>martes</i>         |                      | T302 = MNHN SPOT-1051 Fance                       | Sanger (overlapping PCRs)    | MW257228         | 3                 |
| Caniformia | Mustelidae  | Martinae         | <i>Martes</i>        | <i>melampus</i>       |                      |                                                   |                              | NC 009678        | 1                 |
| Caniformia | Mustelidae  | Martinae         | <i>Martes</i>        | <i>pennanti</i>       |                      |                                                   |                              | NC 020664        | 16                |
| Caniformia | Mustelidae  | Martinae         | <i>Martes</i>        | <i>zibellina</i>      |                      |                                                   |                              | NC 011579        | 39                |
| Caniformia | Mustelidae  | Melinae          | <i>Meles</i>         | <i>anakuma</i>        |                      |                                                   |                              | NC 009677        | 1                 |
| Caniformia | Mustelidae  | Melinae          | <i>Meles</i>         | <i>leucurus</i>       |                      |                                                   |                              | NC 039173        | 4                 |
| Caniformia | Mustelidae  | Melinae          | <i>Meles</i>         | <i>meles</i>          |                      | T303 = MNHN SPOT-1533                             | Sanger (overlapping PCRs)    | MW257227         | 3                 |
| Caniformia | Mustelidae  | Mellivorinae     | <i>Mellivora</i>     | <i>capensis</i>       |                      | T370 = SUN-103 Tanzania                           | Sanger (overlapping PCRs)    | MW257239         | 1                 |
| Caniformia | Mustelidae  | Helictidinae     | <i>Melagale</i>      | <i>moschata</i>       | <i>subaurantiaca</i> |                                                   |                              | KP726273         | 1                 |
| Caniformia | Mustelidae  | Helictidinae     | <i>Melagale</i>      | <i>moschata</i>       |                      |                                                   |                              | NC 020644        | 1                 |
| Caniformia | Ursidae     | Ursinae          | <i>Melursus</i>      | <i>ursinus</i>        |                      | V7x35A Vietnam                                    | Sanger (overlapping PCRs)    | MW257240         | 1                 |
| Caniformia | Mephitidae  |                  | <i>Mephitis</i>      | <i>mephitis</i>       |                      |                                                   |                              | NC 009970        | 2                 |
| Caniformia | Phocidae    |                  | <i>Mirovanga</i>     | <i>angustirostris</i> |                      |                                                   |                              | SRR10331586*     | 1                 |
| Caniformia | Phocidae    |                  | <i>Mirovanga</i>     | <i>leonina</i>        |                      |                                                   |                              | NC 008422        | 1                 |
| Caniformia | Phocidae    |                  | <i>Monachus</i>      | <i>monachus</i>       |                      |                                                   |                              | NC 044972        | 5                 |

|            |                |                  |                     |                         |                                                 |                    |                                          |             |     |
|------------|----------------|------------------|---------------------|-------------------------|-------------------------------------------------|--------------------|------------------------------------------|-------------|-----|
| Caniformia | Phocidae       |                  | <i>Monachus</i>     | <i>schauinslandi</i>    |                                                 |                    |                                          | NC 008421   | 1   |
| Feliformia | Herpestidae    | Mungotinae       | <i>Mungos</i>       | <i>mungo</i>            | MNHN C78, Univ. Montpellier T-1112              |                    | Sanger (overlapping PCRs)                | MW257205    | 1   |
| Feliformia | Herpestidae    | Mungotinae       | <i>Mungos</i>       | <i>mungo</i>            |                                                 |                    |                                          | SRR7704821* | 1   |
| Feliformia | Eupleridae     | Galidiinae       | <i>Mungotictis</i>  | <i>decemlineata</i>     |                                                 |                    |                                          | NC 027828   | 1   |
| Caniformia | Mustelidae     | Mustelinae       | <i>Mustela</i>      | <i>altaica</i>          |                                                 |                    |                                          | NC 021751   | 1   |
| Caniformia | Mustelidae     | Mustelinae       | <i>Mustela</i>      | <i>erminea</i>          | T305 = MNHN SPOT-1142                           |                    | Sanger (overlapping PCRs)                | MW257230    | 2   |
| Caniformia | Mustelidae     | Mustelinae       | <i>Mustela</i>      | <i>eversmannii</i>      |                                                 |                    |                                          | NC 028013   | 1   |
| Caniformia | Mustelidae     | Mustelinae       | <i>Mustela</i>      | <i>frenata</i>          |                                                 |                    |                                          | NC 020640   | 1   |
| Caniformia | Mustelidae     | Mustelinae       | <i>Mustela</i>      | <i>itarsi</i>           |                                                 |                    |                                          | NC 034330   | 19  |
| Caniformia | Mustelidae     | Mustelinae       | <i>Mustela</i>      | <i>kathiah</i>          |                                                 |                    |                                          | NC 023210   | 1   |
| Caniformia | Mustelidae     | Mustelinae       | <i>Mustela</i>      | <i>niagripes</i>        |                                                 |                    |                                          | NC 024942   | 1   |
| Caniformia | Mustelidae     | Mustelinae       | <i>Mustela</i>      | <i>niivalis</i>         | T306 = MNHN SPOT-2728, MNHN-ZM 2004-391, France |                    | Sanger (overlapping PCRs)                | MW257229    | 5   |
| Caniformia | Mustelidae     | Mustelinae       | <i>Mustela</i>      | <i>putorius</i>         |                                                 |                    |                                          | NC 020638   | 4   |
| Caniformia | Mustelidae     | Mustelinae       | <i>Mustela</i>      | <i>sibirica</i>         |                                                 |                    |                                          | AP017394    | 11  |
| Caniformia | Mustelidae     | Mustelinae       | <i>Mustela</i>      | <i>sibirica</i>         |                                                 |                    |                                          | NC 020637   | 6   |
| Feliformia | Nandiniidae    |                  | <i>Nandinia</i>     | <i>binotata</i>         |                                                 |                    |                                          | NC 024567   | 1   |
| Caniformia | Procyonidae    |                  | <i>Nasua</i>        | <i>nasua</i>            |                                                 |                    |                                          | NC 020647   | 1   |
| Feliformia | Felidae        | Pantherinae      | <i>Neofelis</i>     | <i>nebulosa</i>         |                                                 |                    |                                          | NC 008450   | 3   |
| Caniformia | Phocidae       |                  | <i>Neophoca</i>     | <i>cinerea</i>          |                                                 |                    |                                          | NC 008419   | 1   |
| Caniformia | Mustelidae     | Mustelinae       | <i>Neovison</i>     | <i>vison</i>            |                                                 |                    |                                          | NC 020641   | 3   |
| Caniformia | Canidae        |                  | <i>Nyctereutes</i>  | <i>procyonoides</i>     |                                                 |                    |                                          | NC 013700   | 3   |
| Caniformia | Odobenidae     |                  | <i>Odobenus</i>     | <i>rosmarus</i>         |                                                 |                    |                                          | NC 004029   | 29  |
| Caniformia | Phocidae       |                  | <i>Ommatophoca</i>  | <i>rassii</i>           |                                                 |                    |                                          | RER1        | 1   |
| Caniformia | Otariidae      |                  | <i>Otaria</i>       | <i>byronia</i>          | OTAB; Parc zoologique de Paris                  |                    | Sanger (overlapping PCRs)                | MW257231    | 1   |
| Feliformia | Felidae        | Felinae          | <i>Otocolobus</i>   | <i>manul</i>            |                                                 |                    |                                          | NC 028323   | 1   |
| Caniformia | Canidae        |                  | <i>Otocyon</i>      | <i>megalotis</i>        | SAF1 South Africa                               |                    | Sanger (overlapping PCRs)                | MW257223    | 2   |
| Feliformia | Viverridae     | Paradoxurinae    | <i>Paguma</i>       | <i>larvata</i>          | PDS511 Laos                                     |                    | Sanger (overlapping PCRs)                | MW257220    | 2   |
| Feliformia | Felidae        | Pantherinae      | <i>Panthera</i>     | <i>leo</i>              | NERO; Parc zoologique de Paris                  |                    | Ion Torrent (overlapping PCRs) MRD = 211 | MW257216    | 19  |
| Feliformia | Felidae        | Pantherinae      | <i>Panthera</i>     | <i>leo</i>              |                                                 | <i>spelaea</i>     |                                          | KX258452    | 2   |
| Feliformia | Felidae        | Pantherinae      | <i>Panthera</i>     | <i>onca</i>             |                                                 |                    |                                          | KP202264    | 2   |
| Feliformia | Felidae        | Pantherinae      | <i>Panthera</i>     | <i>onca</i>             |                                                 |                    |                                          | NC 022842   | 1   |
| Feliformia | Felidae        | Pantherinae      | <i>Panthera</i>     | <i>pardus</i>           |                                                 |                    |                                          | NC 010641   | 5   |
| Feliformia | Felidae        | Pantherinae      | <i>Panthera</i>     | <i>pardus</i>           |                                                 | <i>japonensis</i>  |                                          | KI866876    | 8   |
| Feliformia | Felidae        | Pantherinae      | <i>Panthera</i>     | <i>tigris</i>           |                                                 |                    |                                          | NC 010642   | 35  |
| Feliformia | Felidae        | Pantherinae      | <i>Panthera</i>     | <i>tigris</i>           |                                                 | <i>amoyensis</i>   |                                          | NC 014770   | 2   |
| Feliformia | Felidae        | Pantherinae      | <i>Panthera</i>     | <i>uncta</i>            |                                                 |                    |                                          | KP202269    | 1   |
| Feliformia | Felidae        | Pantherinae      | <i>Panthera</i>     | <i>uncta</i>            |                                                 |                    |                                          | NC 010638   | 1   |
| Feliformia | Viverridae     | Paradoxurinae    | <i>Paradoxurus</i>  | <i>hermaphroditus</i>   |                                                 |                    |                                          | NC 039591   | 1   |
| Feliformia | Viverridae     | Paradoxurinae    | <i>Paradoxurus</i>  | <i>hermaphroditus</i>   | NLNC50 Laos                                     |                    | Sanger (overlapping PCRs)                | MW257219    | 1   |
| Feliformia | Viverridae     | Paradoxurinae    | <i>Paradoxurus</i>  | <i>jerdoni</i>          |                                                 |                    |                                          | MH464793    | 1   |
| Feliformia | Hyainidae      |                  | <i>Parahyaena</i>   | <i>brunnea</i>          |                                                 |                    |                                          | NC 038159   | 15  |
| Feliformia | Felidae        | Pantherinae      | <i>Parafelis</i>    | <i>marmorata</i>        | NLN3 Laos                                       |                    | Sanger (overlapping PCRs)                | MW257207    | 2   |
| Caniformia | Phocidae       |                  | <i>Phoca</i>        | <i>fasciata</i>         |                                                 |                    |                                          | NC 008428   | 1   |
| Caniformia | Phocidae       |                  | <i>Phoca</i>        | <i>groenlandica</i>     |                                                 |                    |                                          | NC 008429   | 54  |
| Caniformia | Phocidae       |                  | <i>Phoca</i>        | <i>largha</i>           |                                                 |                    |                                          | NC 008430   | 1   |
| Caniformia | Phocidae       |                  | <i>Phoca</i>        | <i>vitulina</i>         |                                                 |                    |                                          | NC 001325   | 1   |
| Caniformia | Otariidae      |                  | <i>Phocartos</i>    | <i>hookeri</i>          |                                                 |                    |                                          | NC 008418   | 1   |
| Caniformia | Mustelidae     | Galictinae       | <i>Poecilogale</i>  | <i>albinucha</i>        | T602 = FMNH 149354 Burundi                      |                    | Sanger (overlapping PCRs)                | MW257232    | 1   |
| Caniformia | Procyonidae    |                  | <i>Potos</i>        | <i>flavus</i>           | T414 = TCCV 1995.125                            |                    | Sanger (overlapping PCRs)                | MW257234    | 1   |
| Feliformia | Felidae        | Felinae          | <i>Prionailurus</i> | <i>bengalensis</i>      | KKM45 Cambodia                                  |                    | Sanger (overlapping PCRs)                | MW257210    | 20  |
| Feliformia | Felidae        | Felinae          | <i>Prionailurus</i> | <i>bengalensis</i>      |                                                 | <i>javansensis</i> |                                          | NC 028301   | 12  |
| Feliformia | Felidae        | Felinae          | <i>Prionailurus</i> | <i>planiceps</i>        |                                                 |                    |                                          | KY682741    | 4   |
| Feliformia | Felidae        | Felinae          | <i>Prionailurus</i> | <i>planiceps</i>        |                                                 |                    |                                          | NC 028312   | 6   |
| Feliformia | Felidae        | Felinae          | <i>Prionailurus</i> | <i>rubiginosus</i>      |                                                 |                    |                                          | NC 028304   | 2   |
| Feliformia | Felidae        | Felinae          | <i>Prionailurus</i> | <i>viverrinus</i>       |                                                 |                    |                                          | NC 028305   | 1   |
| Feliformia | Prionodontidae |                  | <i>Prionodon</i>    | <i>linsang</i>          |                                                 |                    |                                          | ERR2391707* | 1   |
| Feliformia | Prionodontidae |                  | <i>Prionodon</i>    | <i>pardicolor</i>       |                                                 |                    |                                          | NC 024569   | 2   |
| Caniformia | Procyonidae    |                  | <i>Procyon</i>      | <i>lotor</i>            |                                                 |                    |                                          | AB462046    | 3   |
| Caniformia | Procyonidae    |                  | <i>Procyon</i>      | <i>lotor</i>            |                                                 |                    |                                          | AB462049    | 4   |
| Feliformia | Felidae        | Felinae          | <i>Profelis</i>     | <i>aurata</i>           |                                                 |                    |                                          | NC 028299   | 1   |
| Feliformia | Hyainidae      |                  | <i>Proteles</i>     | <i>cristata</i>         | T393 = SUN-1172 South Africa                    |                    | Sanger (overlapping PCRs)                | MW257209    | 6   |
| Feliformia | Felidae        | Felinae          | <i>Puma</i>         | <i>cancolor</i>         |                                                 |                    |                                          | NC 016470   | 22  |
| Feliformia | Felidae        | Felinae          | <i>Puma</i>         | <i>yagouaroundi</i>     |                                                 |                    |                                          | NC 028311   | 1   |
| Caniformia | Phocidae       |                  | <i>Pusa</i>         | <i>caspiaca</i>         |                                                 |                    |                                          | NC 008431   | 1   |
| Caniformia | Phocidae       |                  | <i>Pusa</i>         | <i>hispid</i>           |                                                 |                    |                                          | NC 008433   | 1   |
| Caniformia | Phocidae       |                  | <i>Pusa</i>         | <i>sibirica</i>         |                                                 |                    |                                          | NC 008432   | 2   |
| Feliformia | Eupleridae     | Galidiinae       | <i>Salanoia</i>     | <i>cancolor</i>         | D378; MNHN TC-696                               |                    | illumina (shotgun) MRD = 31              | MW257198    | 1   |
| Feliformia | Felidae        | Machairodontinae | <i>Smilodon</i>     | <i>papulator</i>        |                                                 |                    |                                          | MF871700    | 1   |
| Caniformia | Canidae        |                  | <i>Speothos</i>     | <i>venaticus</i>        | C48; MNHN TC-034                                |                    | Sanger (overlapping PCRs)                | MW257226    | 2   |
| Caniformia | Mephitidae     |                  | <i>Spilogale</i>    | <i>putorius</i>         |                                                 |                    |                                          | NC 010497   | 1   |
| Feliformia | Herpestidae    | Mungotinae       | <i>Suricata</i>     | <i>suricata</i>         |                                                 |                    |                                          | MW257236    | 1   |
| Caniformia | Mustelidae     | Taxidiinae       | <i>Taxidea</i>      | <i>taxus</i>            | SSM10 South Africa                              |                    | Sanger (overlapping PCRs)                | NC 020646   | 1   |
| Caniformia | Ursidae        | Tremarctinae     | <i>Tremarctos</i>   | <i>ornatus</i>          |                                                 |                    |                                          | NC 009969   | 2   |
| Caniformia | Canidae        |                  | <i>Urocyon</i>      | <i>cinereoragenteus</i> |                                                 |                    |                                          | NC 026723   | 21  |
| Caniformia | Canidae        |                  | <i>Urocyon</i>      | <i>littoralis</i>       |                                                 | <i>catalinae</i>   |                                          | KP129018    | 15  |
| Caniformia | Ursidae        | Ursinae          | <i>Ursus</i>        | <i>americanus</i>       |                                                 |                    |                                          | JX196366    | 3   |
| Caniformia | Ursidae        | Ursinae          | <i>Ursus</i>        | <i>arctos</i>           |                                                 |                    |                                          | AP012576    | 6   |
| Caniformia | Ursidae        | Ursinae          | <i>Ursus</i>        | <i>arctos</i>           |                                                 |                    |                                          | EU497665    | 29  |
| Caniformia | Ursidae        | Ursinae          | <i>Ursus</i>        | <i>arctos</i>           |                                                 |                    |                                          | GU573486    | 5   |
| Caniformia | Ursidae        | Ursinae          | <i>Ursus</i>        | <i>arctos</i>           |                                                 |                    |                                          | GU573491    | 207 |
| Caniformia | Ursidae        | Ursinae          | <i>Ursus</i>        | <i>arctos</i>           | 1885 Pakistan                                   |                    | illumina (overlapping PCRs) MRD = 204    | MW257206    | 2   |
| Caniformia | Ursidae        | Ursinae          | <i>Ursus</i>        | <i>arctos</i>           |                                                 | <i>pruinus</i>     |                                          | MG066703    | 3   |
| Caniformia | Ursidae        | Ursinae          | <i>Ursus</i>        | <i>maritimus</i>        |                                                 |                    |                                          | GU573488    | 1   |
| Caniformia | Ursidae        | Ursinae          | <i>Ursus</i>        | <i>maritimus</i>        |                                                 |                    |                                          | NC 003428   | 31  |
| Caniformia | Ursidae        | Ursinae          | <i>Ursus</i>        | <i>spelaeus</i>         |                                                 |                    |                                          | EU327344    | 13  |
| Caniformia | Ursidae        | Ursinae          | <i>Ursus</i>        | <i>spelaeus</i>         |                                                 |                    |                                          | NC 011112   | 8   |
| Caniformia | Ursidae        | Ursinae          | <i>Ursus</i>        | <i>thibetanus</i>       |                                                 | <i>formosanus</i>  |                                          | NC 009331   | 1   |
| Caniformia | Ursidae        | Ursinae          | <i>Ursus</i>        | <i>thibetanus</i>       |                                                 | <i>laniger</i>     |                                          | MH281753    | 2   |
| Caniformia | Ursidae        | Ursinae          | <i>Ursus</i>        | <i>thibetanus</i>       |                                                 | <i>mupinensis</i>  |                                          | NC 008753   | 2   |
| Caniformia | Ursidae        | Ursinae          | <i>Ursus</i>        | <i>thibetanus</i>       |                                                 | <i>thibetanus</i>  |                                          | NC 011118   | 4   |
| Feliformia | Viverridae     | Viverrinae       | <i>Viverra</i>      | <i>tangalunga</i>       |                                                 |                    |                                          | MH464792    | 1   |
| Feliformia | Viverridae     | Viverrinae       | <i>Viverra</i>      | <i>zibetha</i>          | T609 = MNHN SH22                                |                    | Sanger (overlapping PCRs)                | MW257233    | 1   |
| Feliformia | Viverridae     | Viverrinae       | <i>Viverricula</i>  | <i>indica</i>           |                                                 | <i>rasse</i>       |                                          | KX891745    | 1   |
| Feliformia | Viverridae     | Viverrinae       | <i>Viverricula</i>  | <i>indica</i>           |                                                 | <i>indica</i>      |                                          | KX891751    | 1   |
| Feliformia | Viverridae     | Viverrinae       | <i>Viverricula</i>  | <i>indica</i>           |                                                 | <i>pallida</i>     |                                          | NC 025296   | 2   |
| Caniformia | Canidae        |                  | <i>Vulpes</i>       | <i>corsac</i>           |                                                 |                    |                                          | NC 023958   | 1   |
| Caniformia | Canidae        |                  | <i>Vulpes</i>       | <i>ferrilata</i>        |                                                 |                    |                                          | NC 027935   | 1   |
| Caniformia | Canidae        |                  | <i>Vulpes</i>       | <i>lagopus</i>          |                                                 |                    |                                          | NC 026529   | 3   |
| Caniformia | Canidae        |                  | <i>Vulpes</i>       | <i>vulpes</i>           |                                                 |                    |                                          | NC 008434   | 5   |
| Caniformia | Canidae        |                  | <i>Vulpes</i>       | <i>zerda</i>            |                                                 |                    |                                          | KJ603240    | 1   |
| Caniformia | Otariidae      |                  | <i>Zalophus</i>     | <i>californianus</i>    |                                                 |                    |                                          | NC 008416   | 1   |
| Caniformia | Otariidae      |                  | <i>Zalophus</i>     | <i>wollebaeki</i>       |                                                 |                    |                                          | SRR4431565* | 1   |

\* = genomes extracted from SRA data

RERL = AY377132, AY377155, AY377178, AY377201, AY377224, AY377247, AY377269, AY377287, AY377294, AY377316, AY377322, AY377331, AY377349, AY377367, AY377385.

MRD: Mean read depth

TOTAL 2442
