# Supplementary material for: Evolutionary history of Carnivora (Mammalia, Laurasiatheria) inferred from mitochondrial genomes
Source: PubMed Central journal article supplement (PMC7886153; doi:10.1371/journal.pone.0240770), 2021-02-16
Supplement: pone.0240770.s002.pdf [file pone.0240770.s002.pdf]

## **S2 Appendix. PCR primers used in this study**

### **Evolutionary history of Carnivora (Mammalia, Laurasiatheria) inferred from mitochondrial genomes**

Alexandre Hassanin<sup>1\*</sup>, Géraldine Veron<sup>1</sup>, Anne Ropiquet<sup>2</sup>, Bettine Jansen van Vuuren<sup>3</sup>, Alexis Lécu<sup>4</sup>, Steven M. Goodman<sup>5</sup>, Jibrán Haider<sup>1,6,7</sup>, Trung Thanh Nguyen<sup>1</sup>

<sup>1</sup> Institut de Systématique, Évolution, Biodiversité (ISYEB), Sorbonne Université, MNHN, CNRS, EPHE, UA, Paris.

<sup>2</sup> Department of Natural Sciences, Faculty of Science and Technology, Middlesex University, United Kingdom.

<sup>3</sup> Centre for Ecological Genomics and Wildlife Conservation, Department of Zoology, University of Johannesburg, South Africa.

<sup>4</sup> Parc zoologique de Paris, Muséum national d'Histoire naturelle, Paris.

<sup>5</sup> Field Museum of Natural History, Chicago, IL, USA.

<sup>6</sup> Department of Wildlife Management, Pir Mehr Ali Shah, Arid Agriculture University Rawalpindi, Pakistan.

<sup>7</sup> Forest Parks & Wildlife Department Gilgit-Baltistan, Pakistan.

\* Correspondence: [alexandre.hassanin@mnhn.fr](mailto:alexandre.hassanin@mnhn.fr)

|                                                                            |                                                                                                |
|----------------------------------------------------------------------------|------------------------------------------------------------------------------------------------|
| DLU400 [2]<br>DLU400M1: 5'-CGAGCTTAATCACCAWGCCCKCGDGAAA-3'<br>DLU405M1 [2] | LPHELA [3]<br>12SL41 [1]<br>12SL200 [2]<br>12SL600 [3]                                         |
| 12SU1230 [1]<br>12SU1230M1 [3]                                             | 12SL2226 [1]<br>12SL2226M1 [2]                                                                 |
| 12SU829 [1]                                                                | 16SL518 [1]                                                                                    |
| 16SU365 [1]                                                                | 16SL1056 [1]                                                                                   |
| 16SU946 [1]                                                                | N1L64 [1]                                                                                      |
| Uleu [1]<br>U16S1421 [2]                                                   | LMet [2]<br>LMet2 [2]                                                                          |
| N1U840 [1]                                                                 | N2L492 [1]                                                                                     |
| N2U354M2 [2]<br>IleU [2]                                                   | AsnL [1]                                                                                       |
| TrpU [1]                                                                   | C1L705 [2]<br>C1L1143 [3]                                                                      |
| C1U246 [1]<br>UTyr [2]                                                     | C1L1017 [1]<br>LSer [2]                                                                        |
| C1U897M1 [2]                                                               | C2L15 [1]<br>C2L15M1 [2]                                                                       |
| SerU [1]<br>SerUM1 [2]                                                     | A8L1 [1]                                                                                       |
| C2U603 [1]<br>C2U603M3 [2]<br>C2U603M4 [2]                                 | C3L45 [1]<br>C3L45M1: 5'-AGRGCNGANAGRGCYCCTGT-3'<br>C3L168 [2]<br>C3L168M1 [3]<br>C3L168M2 [3] |
| A6U654M1 [2]<br>A6U654M2 [2]                                               | GlyLM1 [2]                                                                                     |
| C3U780 [1]<br>C3U780M1 [2]<br>C3U780M3 [3]                                 | N4L27M1 [2]<br>N4L366 [2]<br>N4L366M1 [3]<br>N4L366M2: 5'-CGYTCYGYTGRITNCCYCATCGRGT-3'         |
| UArg [2]<br>UArgM1: 5'-TGATTCGACTCATTAAA-3'                                | N4L918M1 [1]<br>N4L1071R [2]                                                                   |
| N4U681 [2]                                                                 | Leu2L [1]<br>Leu2LM1 [2]                                                                       |
| Ser2U [1]                                                                  | N5L652 [1]<br>N5L652M1 [3]                                                                     |
| N5U501 [1]<br>N5U501M2: 5'-GGNCGRDCHGAYGCHAAAYACNGCYGC-3'                  | N5L1214 [1]                                                                                    |
| N5U1146 [1]<br>N5U1146M5 [2]                                               | N6RL154 [1]<br>N6RL154M5 [2]<br>CBL1 [3]                                                       |
| N6RU102 [1]                                                                | CBL402 [1]                                                                                     |
| GluMA [2]<br>GluCA: 5'-GACYARTGAYATGAAAAAYCAYCGTTGT-3'<br>CBU162 [1]       | LPROMA: 5'-<br>AGAAAYWTCAGCTTGGGDGYTGAHGGTG-3'<br>LTHR [1]<br>L482 [1]<br>L482M1 [3]           |
| U844 [1]<br>CBU1038M1 [3]<br>U1068 [1]<br>UTHR13 [3]                       | L482 [1]<br>LPHELA [3]                                                                         |

## References

- Hassanin A, Ropiquet A, Couloux A, Cruaud C. Evolution of the mitochondrial genome in mammals living at high altitude: new insights from a study of the tribe Caprini (Bovidae, Antilopinae). *J Mol Evol.* 2009; 68: 293-310. doi: 10.1007/s00239-009-9208-7.
- Hassanin A, Delsuc F, Ropiquet A, Hammer C, Jansen van Vuuren B, Matthee C, et al. Pattern and timing of diversification of Cetartiodactyla (Mammalia, Laurasiatheria), as revealed by a comprehensive analysis of mitochondrial genomes. *C R Biol.* 2012; 335: 32-50. doi: 10.1016/j.crv.2011.11.002.
- Hassanin A, Bonillo C, Tshikung D, Pongombo Shongo C, Pourrut X, Kadjo B, et al. Phylogeny of African fruit bats (Chiroptera, Pteropodidae) based on complete mitochondrial genomes. *J Zool Syst Evol Res.* 2020; 58: 1395-1410. doi: 10.1111/jzs.12373.
