# Supplementary material for: Evolutionary history of Carnivora (Mammalia, Laurasiatheria) inferred from mitochondrial genomes
Source: PubMed Central journal article supplement (PMC7886153; doi:10.1371/journal.pone.0240770), 2021-02-16
Supplement: pone.0240770.s003.pdf [file pone.0240770.s003.pdf]

### **S3 Appendix. Base composition**

#### **Evolutionary history of Carnivora (Mammalia, Laurasiatheria) inferred from mitochondrial genomes**

Alexandre Hassanin<sup>1\*</sup>, Géraldine Veron<sup>1</sup>, Anne Ropiquet<sup>2</sup>, Bettine Jansen van Vuuren<sup>3</sup>, Alexis Lécu<sup>4</sup>, Steven M. Goodman<sup>5</sup>, Jibrán Haider<sup>1,6,7</sup>, Trung Thanh Nguyen<sup>1</sup>

<sup>1</sup> Institut de Systématique, Évolution, Biodiversité (ISYEB), Sorbonne Université, MNHN, CNRS, EPHE, UA, Paris.

<sup>2</sup> Department of Natural Sciences, Faculty of Science and Technology, Middlesex University, United Kingdom.

<sup>3</sup> Centre for Ecological Genomics and Wildlife Conservation, Department of Zoology, University of Johannesburg, South Africa.

<sup>4</sup> Parc zoologique de Paris, Muséum national d'Histoire naturelle, Paris.

<sup>5</sup> Field Museum of Natural History, Chicago, IL, USA.

<sup>6</sup> Department of Wildlife Management, Pir Mehr Ali Shah, Arid Agriculture University Rawalpindi, Pakistan.

<sup>7</sup> Forest Parks & Wildlife Department Gilgit-Baltistan, Pakistan.

\* Correspondence: [alexandre.hassanin@mnhn.fr](mailto:alexandre.hassanin@mnhn.fr)

| Clade     | Family      | Taxons                               | A      | C      | G      | T      | AI     | CI     | GI     | T1     | A2     | C2     | G2     | T2     | A3     | C3     | G2     | T3     |
|-----------|-------------|--------------------------------------|--------|--------|--------|--------|--------|--------|--------|--------|--------|--------|--------|--------|--------|--------|--------|--------|
| Caniflora | Alariaceae  | Allurus fulgens NC01124 1            | 0.3116 | 0.5443 | 0.3221 | 0.2930 | 0.2966 | 0.2377 | 0.1986 | 0.211  | 0.1933 | 0.2654 | 0.2202 | 0.4254 | 0.2818 | 0.2641 | 0.2675 | 0.2768 |
| Caniflora | Alariaceae  | Allurus fulgens ssp. NC00691 1       | 0.3124 | 0.2543 | 0.2123 | 0.3120 | 0.3305 | 0.2385 | 0.1777 | 0.2333 | 0.1936 | 0.2608 | 0.1191 | 0.4266 | 0.4132 | 0.2635 | 0.0469 | 0.2763 |
| Caniflora | Canidae     | Canis adustus K1448271 1             | 0.3021 | 0.2611 | 0.1323 | 0.3045 | 0.3100 | 0.2359 | 0.2145 | 0.2386 | 0.1955 | 0.2660 | 0.1188 | 0.4198 | 0.3999 | 0.2815 | 0.0635 | 0.2551 |
| Caniflora | Canidae     | Canis anthus NC027956 2              | 0.2983 | 0.2697 | 0.1328 | 0.2992 | 0.3188 | 0.2419 | 0.2086 | 0.2308 | 0.1983 | 0.2624 | 0.1169 | 0.4224 | 0.3780 | 0.3046 | 0.0730 | 0.2444 |
| Caniflora | Canidae     | Canis aureus K1448274 1              | 0.3009 | 0.2677 | 0.1305 | 0.3009 | 0.3191 | 0.2415 | 0.2081 | 0.2314 | 0.1982 | 0.2617 | 0.1172 | 0.4229 | 0.3855 | 0.3000 | 0.0660 | 0.2485 |
| Caniflora | Canidae     | Canis latrans NC008097 7             | 0.3018 | 0.2683 | 0.1298 | 0.3002 | 0.3185 | 0.2427 | 0.2088 | 0.2399 | 0.1975 | 0.2622 | 0.1178 | 0.4227 | 0.3893 | 0.2999 | 0.0628 | 0.2480 |
| Caniflora | Canidae     | Canis lupus familiaris NC010340 4    | 0.3018 | 0.2683 | 0.1298 | 0.3002 | 0.3185 | 0.2427 | 0.2088 | 0.2399 | 0.1975 | 0.2622 | 0.1178 | 0.4227 | 0.3893 | 0.2999 | 0.0628 | 0.2480 |
| Caniflora | Canidae     | Canis lupus familiaris NC020008 1231 | 0.3012 | 0.2688 | 0.1302 | 0.2997 | 0.3188 | 0.2427 | 0.2074 | 0.2311 | 0.1975 | 0.2622 | 0.1180 | 0.4224 | 0.3874 | 0.3016 | 0.0653 | 0.2458 |
| Caniflora | Canidae     | Canis mesomelas K1448280 1           | 0.3039 | 0.2663 | 0.1287 | 0.3012 | 0.3185 | 0.2429 | 0.2090 | 0.2396 | 0.1956 | 0.2628 | 0.1200 | 0.4217 | 0.3976 | 0.2931 | 0.0570 | 0.2523 |
| Caniflora | Canidae     | Chrysocyon brachyurus NC021172 1     | 0.3075 | 0.2581 | 0.1258 | 0.3086 | 0.3235 | 0.2391 | 0.2030 | 0.2344 | 0.1963 | 0.2624 | 0.1183 | 0.4239 | 0.4027 | 0.2727 | 0.0561 | 0.2685 |
| Caniflora | Canidae     | Cuon alpinus NC013445 3              | 0.2994 | 0.2587 | 0.1328 | 0.3091 | 0.3164 | 0.2408 | 0.2092 | 0.2336 | 0.1950 | 0.2611 | 0.1197 | 0.4242 | 0.3868 | 0.2742 | 0.0695 | 0.2695 |
| Caniflora | Canidae     | Lycalopex schueleri K1448284 1       | 0.3050 | 0.2612 | 0.1280 | 0.3058 | 0.3201 | 0.2423 | 0.2078 | 0.2388 | 0.1958 | 0.2653 | 0.1186 | 0.4203 | 0.3901 | 0.2760 | 0.0575 | 0.2674 |
| Caniflora | Canidae     | Lycocyon pictus NC028472 2           | 0.3046 | 0.2702 | 0.1265 | 0.2996 | 0.3205 | 0.2466 | 0.2041 | 0.2388 | 0.1969 | 0.2633 | 0.1186 | 0.4213 | 0.3966 | 0.2733 | 0.0569 | 0.2458 |
| Caniflora | Canidae     | Nyctereutes procyonoides NC013700 3  | 0.3044 | 0.2810 | 0.1324 | 0.2822 | 0.3174 | 0.2458 | 0.2097 | 0.2272 | 0.1961 | 0.2652 | 0.1186 | 0.4202 | 0.3996 | 0.3321 | 0.0689 | 0.1994 |
| Caniflora | Canidae     | Odocoileus megalotis SAF1 2          | 0.2900 | 0.2858 | 0.1453 | 0.2790 | 0.3151 | 0.2522 | 0.2145 | 0.2183 | 0.1955 | 0.2683 | 0.1197 | 0.4166 | 0.3593 | 0.3369 | 0.1016 | 0.2022 |
| Caniflora | Canidae     | Speothos venereus C48 2              | 0.3002 | 0.2643 | 0.1308 | 0.3047 | 0.3202 | 0.2452 | 0.2052 | 0.2294 | 0.1972 | 0.2655 | 0.1175 | 0.4199 | 0.3832 | 0.2821 | 0.0697 | 0.2649 |
| Caniflora | Canidae     | Urocyon cinereoargenteus NC026723 21 | 0.2909 | 0.2795 | 0.1443 | 0.2853 | 0.3149 | 0.2424 | 0.2133 | 0.2294 | 0.1963 | 0.2669 | 0.1189 | 0.4179 | 0.3616 | 0.3291 | 0.1008 | 0.2086 |
| Caniflora | Canidae     | Urocyon lincolni KPI29018 15         | 0.2911 | 0.2796 | 0.1440 | 0.2853 | 0.3152 | 0.2422 | 0.2130 | 0.2297 | 0.1961 | 0.2669 | 0.1191 | 0.4179 | 0.3621 | 0.3296 | 0.1000 | 0.2083 |
| Caniflora | Canidae     | Vulpes corsac NC023958 5             | 0.2953 | 0.2728 | 0.1389 | 0.2931 | 0.3174 | 0.2505 | 0.2122 | 0.2199 | 0.1966 | 0.2641 | 0.1191 | 0.4202 | 0.3718 | 0.3038 | 0.0853 | 0.2391 |
| Caniflora | Canidae     | Vulpes ferratilis NC027935 1         | 0.2927 | 0.2756 | 0.1415 | 0.2902 | 0.3166 | 0.2497 | 0.2130 | 0.2208 | 0.1969 | 0.2655 | 0.1186 | 0.4191 | 0.3646 | 0.3116 | 0.0930 | 0.2308 |
| Caniflora | Canidae     | Vulpes lagopus NC026529 3            | 0.2930 | 0.2779 | 0.1408 | 0.2884 | 0.3182 | 0.2491 | 0.2108 | 0.2219 | 0.1969 | 0.2658 | 0.1186 | 0.4188 | 0.3638 | 0.3188 | 0.0930 | 0.2244 |
| Caniflora | Canidae     | Vulpes vulpes NC008434 5             | 0.2943 | 0.2765 | 0.1389 | 0.2903 | 0.3149 | 0.2508 | 0.2146 | 0.2202 | 0.1966 | 0.2655 | 0.1189 | 0.4191 | 0.3713 | 0.3133 | 0.0839 | 0.2316 |
| Caniflora | Canidae     | Vulpes zerda K060240 1               | 0.2878 | 0.2904 | 0.1454 | 0.2764 | 0.3144 | 0.2524 | 0.2149 | 0.2183 | 0.1958 | 0.2647 | 0.1197 | 0.4199 | 0.3552 | 0.3541 | 0.1016 | 0.1911 |
| Caniflora | Canidae     | Canis lupus familiaris NC010340 4    | 0.3018 | 0.2683 | 0.1298 | 0.3002 | 0.3185 | 0.2427 | 0.2088 | 0.2399 | 0.1975 | 0.2622 | 0.1178 | 0.4227 | 0.3893 | 0.2999 | 0.0628 | 0.2480 |
| Caniflora | Merphitidae | Mephitis mephitis NC020296 1         | 0.3259 | 0.2470 | 0.1214 | 0.3058 | 0.3288 | 0.2316 | 0.2027 | 0.2369 | 0.1969 | 0.2638 | 0.1169 | 0.4224 | 0.4521 | 0.2455 | 0.0444 | 0.2580 |
| Caniflora | Merphitidae | Spilogale putorius NC010497 1        | 0.3271 | 0.2441 | 0.1206 | 0.3082 | 0.3260 | 0.2263 | 0.2033 | 0.2444 | 0.1975 | 0.2644 | 0.1166 | 0.4216 | 0.4579 | 0.2416 | 0.0419 | 0.2585 |
| Caniflora | Mustelidae  | Aonyx cinerea NC035814 2             | 0.2997 | 0.2992 | 0.1409 | 0.2602 | 0.3169 | 0.2647 | 0.2102 | 0.2083 | 0.1938 | 0.2683 | 0.1191 | 0.4188 | 0.3885 | 0.3646 | 0.0933 | 0.1536 |
| Caniflora | Mustelidae  | Arctonyx colлари NC020645 1          | 0.3195 | 0.2670 | 0.1209 | 0.2927 | 0.3238 | 0.2377 | 0.2034 | 0.2341 | 0.1963 | 0.2641 | 0.1164 | 0.4232 | 0.4382 | 0.2991 | 0.0419 | 0.2208 |
| Caniflora | Mustelidae  | Eiylhydra lutris NC009692 1          | 0.3179 | 0.2681 | 0.1208 | 0.3167 | 0.3258 | 0.2444 | 0.2063 | 0.2345 | 0.1955 | 0.2663 | 0.1185 | 0.4233 | 0.4383 | 0.3403 | 0.0883 | 0.1925 |
| Caniflora | Mustelidae  | Galeoscoptes 1412 1                  | 0.3046 | 0.2799 | 0.1381 | 0.2774 | 0.3124 | 0.2497 | 0.2163 | 0.2216 | 0.1958 | 0.2692 | 0.1172 | 0.4178 | 0.4057 | 0.3207 | 0.0808 | 0.1927 |
| Caniflora | Mustelidae  | Gulo gulo NC009685 3                 | 0.3049 | 0.2828 | 0.1331 | 0.2791 | 0.3153 | 0.2512 | 0.2107 | 0.2229 | 0.1943 | 0.2651 | 0.1180 | 0.4227 | 0.4052 | 0.3322 | 0.0708 | 0.1918 |
| Caniflora | Mustelidae  | Ictonyx striatus T299 1              | 0.3105 | 0.2806 | 0.1285 | 0.2803 | 0.3224 | 0.2458 | 0.2077 | 0.2241 | 0.1944 | 0.2688 | 0.1178 | 0.4191 | 0.4149 | 0.3274 | 0.0601 | 0.1977 |
| Caniflora | Mustelidae  | Lontra canadensis SRR10409165 1      | 0.2942 | 0.2906 | 0.1479 | 0.2673 | 0.3121 | 0.2583 | 0.2136 | 0.2161 | 0.1936 | 0.2674 | 0.1191 | 0.4199 | 0.3768 | 0.3460 | 0.1111 | 0.1661 |
| Caniflora | Mustelidae  | Lutra lutra LC050126 1               | 0.3072 | 0.2914 | 0.1542 | 0.2672 | 0.3207 | 0.2613 | 0.2061 | 0.2119 | 0.1938 | 0.2674 | 0.1183 | 0.4209 | 0.4071 | 0.3455 | 0.0783 | 0.1691 |
| Caniflora | Mustelidae  | Lutra lutra SRR10409165 1            | 0.3072 | 0.2914 | 0.1542 | 0.2672 | 0.3207 | 0.2613 | 0.2061 | 0.2119 | 0.1938 | 0.2674 | 0.1183 | 0.4209 | 0.4071 | 0.3455 | 0.0783 | 0.1691 |
| Caniflora | Mustelidae  | Lutra lutra SRR10409165 1            | 0.3072 | 0.2914 | 0.1542 | 0.2672 | 0.3207 | 0.2613 | 0.2061 | 0.2119 | 0.1938 | 0.2674 | 0.1183 | 0.4209 | 0.4071 | 0.3455 | 0.0783 | 0.1691 |
| Caniflora | Mustelidae  | Lutra lutra SRR10409165 1            | 0.3072 | 0.2914 | 0.1542 | 0.2672 | 0.3207 | 0.2613 | 0.2061 | 0.2119 | 0.1938 | 0.2674 | 0.1183 | 0.4209 | 0.4071 | 0.3455 | 0.0783 | 0.1691 |
| Caniflora | Mustelidae  | Lutra lutra SRR10409165 1            | 0.3072 | 0.2914 | 0.1542 | 0.2672 | 0.3207 | 0.2613 | 0.2061 | 0.2119 | 0.1938 | 0.2674 | 0.1183 | 0.4209 | 0.4071 | 0.3455 | 0.0783 | 0.1691 |
| Caniflora | Mustelidae  | Lutra lutra SRR10409165 1            | 0.3072 | 0.2914 | 0.1542 | 0.2672 | 0.3207 | 0.2613 | 0.2061 | 0.2119 | 0.1938 | 0.2674 | 0.1183 | 0.4209 | 0.4071 | 0.3455 | 0.0783 | 0.1691 |
| Caniflora | Mustelidae  | Lutra lutra SRR10409165 1            | 0.3072 | 0.2914 | 0.1542 | 0.2672 | 0.3207 | 0.2613 | 0.2061 | 0.2119 | 0.1938 | 0.2674 | 0.1183 | 0.4209 | 0.4071 | 0.3455 | 0.0783 | 0.1691 |
| Caniflora | Mustelidae  | Lutra lutra SRR10409165 1            | 0.3072 | 0.2914 | 0.1542 | 0.2672 | 0.3207 | 0.2613 | 0.2061 | 0.2119 | 0.1938 | 0.2674 | 0.1183 | 0.4209 | 0.4071 | 0.3455 | 0.0783 | 0.1691 |
| Caniflora | Mustelidae  | Lutra lutra SRR10409165 1            | 0.3072 | 0.2914 | 0.1542 | 0.2672 | 0.3207 | 0.2613 | 0.2061 | 0.2119 | 0.1938 | 0.2674 | 0.1183 | 0.4209 | 0.4071 | 0.3455 | 0.0783 | 0.1691 |
| Caniflora | Mustelidae  | Lutra lutra SRR10409165 1            | 0.3072 | 0.2914 | 0.1542 | 0.2672 | 0.3207 | 0.2613 | 0.2061 | 0.2119 | 0.1938 | 0.2674 | 0.1183 | 0.4209 | 0.4071 | 0.3455 | 0.0783 | 0.1691 |
| Caniflora | Mustelidae  | Lutra lutra SRR10409165 1            | 0.3072 | 0.2914 | 0.1542 | 0.2672 | 0.3207 | 0.2613 | 0.2061 | 0.2119 | 0.1938 | 0.2674 | 0.1183 | 0.4209 | 0.4071 | 0.3455 | 0.0783 | 0.1691 |
| Caniflora | Mustelidae  | Lutra lutra SRR10409165 1            | 0.3072 | 0.2914 | 0.1542 | 0.2672 | 0.3207 | 0.2613 | 0.2061 | 0.2119 | 0.1938 | 0.2674 | 0.1183 | 0.4209 | 0.4071 | 0.3455 | 0.0783 | 0.1691 |
| Caniflora | Mustelidae  | Lutra lutra SRR10409165 1            | 0.3072 | 0.2914 | 0.1542 | 0.2672 | 0.3207 | 0.2613 | 0.2061 | 0.2119 | 0.1938 | 0.2674 | 0.1183 | 0.4209 | 0.4071 | 0.3455 | 0.0783 | 0.1691 |
| Caniflora | Mustelidae  | Lutra lutra SRR10409165 1            | 0.3072 | 0.2914 | 0.1542 | 0.2672 | 0.3207 | 0.2613 | 0.2061 | 0.2119 | 0.1938 | 0.2674 | 0.1183 | 0.4209 | 0.4071 | 0.3455 | 0.0783 | 0.1691 |
| Caniflora | Mustelidae  | Lutra lutra SRR10409165 1            | 0.3072 | 0.2914 | 0.1542 | 0.2672 | 0.3207 | 0.2613 | 0.2061 | 0.2119 | 0.1938 | 0.2674 | 0.1183 | 0.4209 | 0.4071 | 0.3455 | 0.0783 | 0.1691 |
| Caniflora | Mustelidae  | Lutra lutra SRR10409165 1            | 0.3072 | 0.2914 | 0.1542 | 0.2672 | 0.3207 | 0.2613 | 0.2061 | 0.2119 | 0.1938 | 0.2674 | 0.1183 | 0.4209 | 0.4071 | 0.3455 | 0.0783 | 0.1691 |
| Caniflora | Mustelidae  | Lutra lutra SRR10409165 1            | 0.3072 | 0.2914 | 0.1542 | 0.2672 | 0.3207 | 0.2613 | 0.2061 | 0.2119 | 0.1938 | 0.2674 | 0.1183 | 0.4209 | 0.4071 | 0.3455 | 0.0783 | 0.1691 |
| Caniflora | Mustelidae  | Lutra lutra SRR10409165 1            | 0.3072 | 0.2914 | 0.1542 | 0.2672 | 0.3207 | 0.2613 | 0.2061 | 0.2119 | 0.1938 | 0.2674 | 0.1183 | 0.4209 | 0.4071 | 0.3455 | 0.0783 | 0.1691 |
| Caniflora | Mustelidae  | Lutra lutra SRR10409165 1            | 0.3072 | 0.2914 |        |        |        |        |        |        |        |        |        |        |        |        |        |        |

|            |                |                                      |        |        |        |        |        |        |        |        |        |        |        |        |        |        |        |        |
|------------|----------------|--------------------------------------|--------|--------|--------|--------|--------|--------|--------|--------|--------|--------|--------|--------|--------|--------|--------|--------|
| Feliformia | Felidae        | Leopardus tigris NC028317_1          | 0.3146 | 0.2806 | 0.1251 | 0.2797 | 0.3241 | 0.2524 | 0.2055 | 0.2180 | 0.1972 | 0.2669 | 0.1189 | 0.4171 | 0.4227 | 0.3224 | 0.0508 | 0.2041 |
| Feliformia | Felidae        | Leopardus wiedii NC028318_1          | 0.3152 | 0.2815 | 0.1274 | 0.2783 | 0.3219 | 0.2506 | 0.2094 | 0.2183 | 0.1972 | 0.2663 | 0.1188 | 0.4171 | 0.4227 | 0.3224 | 0.0514 | 0.1980 |
| Feliformia | Felidae        | Lepus sylvaticus NC028316_1          | 0.3152 | 0.2685 | 0.1251 | 0.2912 | 0.3224 | 0.2449 | 0.2072 | 0.2255 | 0.1986 | 0.2635 | 0.1178 | 0.4204 | 0.4246 | 0.2971 | 0.0505 | 0.2277 |
| Feliformia | Felidae        | Lynx canadensis NC028313_1           | 0.3066 | 0.2890 | 0.1336 | 0.2709 | 0.3207 | 0.2547 | 0.2091 | 0.2155 | 0.1980 | 0.2658 | 0.1183 | 0.4179 | 0.4010 | 0.3466 | 0.0733 | 0.1791 |
| Feliformia | Felidae        | Lynx lynx NC027083_4                 | 0.3064 | 0.2913 | 0.1334 | 0.2689 | 0.3202 | 0.2566 | 0.2097 | 0.2136 | 0.1977 | 0.2652 | 0.1183 | 0.4188 | 0.4013 | 0.3521 | 0.0722 | 0.1744 |
| Feliformia | Felidae        | Lynx pardus NC028319_161             | 0.3086 | 0.2864 | 0.1314 | 0.2736 | 0.3205 | 0.2533 | 0.2094 | 0.2169 | 0.1983 | 0.2649 | 0.1180 | 0.4188 | 0.4071 | 0.3410 | 0.0667 | 0.1852 |
| Feliformia | Felidae        | Lynx rufus NC014456_3                | 0.3079 | 0.2856 | 0.1327 | 0.2739 | 0.3182 | 0.2547 | 0.2108 | 0.2163 | 0.1988 | 0.2638 | 0.1175 | 0.4199 | 0.4066 | 0.3382 | 0.0697 | 0.1855 |
| Feliformia | Felidae        | Neofelis nebulosa NC008410_3         | 0.2996 | 0.2790 | 0.1379 | 0.2835 | 0.3163 | 0.2516 | 0.2122 | 0.2199 | 0.1966 | 0.2663 | 0.1194 | 0.4177 | 0.3857 | 0.3191 | 0.0822 | 0.2130 |
| Feliformia | Felidae        | Odocoileus manul NC028323_1          | 0.3167 | 0.2695 | 0.1236 | 0.2903 | 0.3238 | 0.2416 | 0.2066 | 0.2280 | 0.1983 | 0.2641 | 0.1172 | 0.4204 | 0.4279 | 0.3027 | 0.0469 | 0.2224 |
| Feliformia | Felidae        | Panthera leo NERO_19                 | 0.3026 | 0.2804 | 0.1341 | 0.2829 | 0.3167 | 0.2510 | 0.2122 | 0.2201 | 0.1961 | 0.2664 | 0.1197 | 0.4178 | 0.3949 | 0.3238 | 0.0705 | 0.2108 |
| Feliformia | Felidae        | Panthera leo spelaea KX258452_2      | 0.2990 | 0.2803 | 0.1379 | 0.2827 | 0.3164 | 0.2531 | 0.2133 | 0.2172 | 0.1956 | 0.2658 | 0.1200 | 0.4186 | 0.3852 | 0.3221 | 0.0803 | 0.2123 |
| Feliformia | Felidae        | Panthera onca KP020264_2             | 0.2994 | 0.2819 | 0.1383 | 0.2805 | 0.3160 | 0.2558 | 0.2127 | 0.2155 | 0.1955 | 0.2669 | 0.1200 | 0.4177 | 0.3866 | 0.3230 | 0.0822 | 0.2083 |
| Feliformia | Felidae        | Panthera onca NC028284_2             | 0.3008 | 0.2829 | 0.1364 | 0.2800 | 0.3166 | 0.2552 | 0.2122 | 0.2161 | 0.1944 | 0.2683 | 0.1208 | 0.4166 | 0.3913 | 0.3252 | 0.0761 | 0.2074 |
| Feliformia | Felidae        | Panthera pardus japonensis KB86676_8 | 0.2996 | 0.2808 | 0.1368 | 0.2828 | 0.3158 | 0.2522 | 0.2133 | 0.2188 | 0.1952 | 0.2658 | 0.1205 | 0.4185 | 0.3880 | 0.3244 | 0.0767 | 0.2111 |
| Feliformia | Felidae        | Panthera pardus NC010641_5           | 0.3001 | 0.2805 | 0.1366 | 0.2828 | 0.3146 | 0.2519 | 0.2147 | 0.2188 | 0.1950 | 0.2652 | 0.1205 | 0.4193 | 0.3907 | 0.3244 | 0.0747 | 0.2102 |
| Feliformia | Felidae        | Panthera tigris amoyensis NC014770_2 | 0.2993 | 0.2810 | 0.1384 | 0.2813 | 0.3174 | 0.2510 | 0.2124 | 0.2191 | 0.1947 | 0.2655 | 0.1205 | 0.4193 | 0.3857 | 0.3266 | 0.0822 | 0.2055 |
| Feliformia | Felidae        | Panthera tigris NC010642_35          | 0.2992 | 0.2821 | 0.1384 | 0.2804 | 0.3180 | 0.2519 | 0.2111 | 0.2191 | 0.1955 | 0.2660 | 0.1200 | 0.4185 | 0.3841 | 0.3282 | 0.0841 | 0.2036 |
| Feliformia | Felidae        | Panthera uncia KP202269_1            | 0.3013 | 0.2823 | 0.1357 | 0.2807 | 0.3180 | 0.2549 | 0.2108 | 0.2163 | 0.1958 | 0.2669 | 0.1202 | 0.4171 | 0.3902 | 0.3252 | 0.0761 | 0.2086 |
| Feliformia | Felidae        | Panthera uncia NC010638_1            | 0.3016 | 0.2813 | 0.1363 | 0.2809 | 0.3188 | 0.2535 | 0.2102 | 0.2174 | 0.1969 | 0.2680 | 0.1194 | 0.4157 | 0.3891 | 0.3224 | 0.0791 | 0.2094 |
| Feliformia | Felidae        | Pardofelis pardus NKL3_2             | 0.3081 | 0.2794 | 0.1321 | 0.2805 | 0.3210 | 0.2524 | 0.2088 | 0.2177 | 0.1977 | 0.2663 | 0.1183 | 0.4177 | 0.4054 | 0.3194 | 0.0692 | 0.2061 |
| Feliformia | Felidae        | Pionailurus bengalensis KKM45_20     | 0.3129 | 0.2745 | 0.1267 | 0.2859 | 0.3224 | 0.2430 | 0.2088 | 0.2258 | 0.1986 | 0.2647 | 0.1175 | 0.4193 | 0.4177 | 0.3158 | 0.0539 | 0.2127 |
| Feliformia | Felidae        | Pionailurus bengalensis NC028301_12  | 0.3154 | 0.2747 | 0.1240 | 0.2859 | 0.3244 | 0.2447 | 0.2066 | 0.2244 | 0.1988 | 0.2655 | 0.1172 | 0.4188 | 0.4229 | 0.3141 | 0.0483 | 0.2147 |
| Feliformia | Felidae        | Pionailurus plianeps KY682741_4      | 0.3123 | 0.2772 | 0.1274 | 0.2832 | 0.3210 | 0.2472 | 0.2091 | 0.2227 | 0.1988 | 0.2641 | 0.1172 | 0.4199 | 0.4171 | 0.3202 | 0.0558 | 0.2069 |
| Feliformia | Felidae        | Pionailurus plianeps NC028312_6      | 0.3119 | 0.2779 | 0.1279 | 0.2823 | 0.3207 | 0.2469 | 0.2094 | 0.2230 | 0.1988 | 0.2649 | 0.1172 | 0.4191 | 0.4160 | 0.3219 | 0.0572 | 0.2049 |
| Feliformia | Felidae        | Pionailurus rubiginos NC028304_2     | 0.3144 | 0.2764 | 0.1260 | 0.2853 | 0.3213 | 0.2466 | 0.2094 | 0.2227 | 0.1980 | 0.2649 | 0.1172 | 0.4191 | 0.4160 | 0.3219 | 0.0572 | 0.2049 |
| Feliformia | Felidae        | Pionailurus viverrinus NC028305_1    | 0.3114 | 0.2762 | 0.1285 | 0.2839 | 0.3210 | 0.2460 | 0.2102 | 0.2227 | 0.1980 | 0.2655 | 0.1178 | 0.4188 | 0.4152 | 0.3171 | 0.0575 | 0.2102 |
| Feliformia | Felidae        | Profelis aurata NC028299_1           | 0.3135 | 0.2666 | 0.1276 | 0.2923 | 0.3244 | 0.2460 | 0.2061 | 0.2236 | 0.1972 | 0.2641 | 0.1183 | 0.4204 | 0.4191 | 0.2896 | 0.0583 | 0.2330 |
| Feliformia | Felidae        | Puma concolor NC016470_22            | 0.3146 | 0.2763 | 0.1268 | 0.2822 | 0.3235 | 0.2472 | 0.2066 | 0.2227 | 0.1988 | 0.2647 | 0.1175 | 0.4191 | 0.4216 | 0.3171 | 0.0564 | 0.2049 |
| Feliformia | Felidae        | Puma yagouaroundi NC028311_1         | 0.3170 | 0.2712 | 0.1250 | 0.2869 | 0.3252 | 0.2460 | 0.2058 | 0.2230 | 0.1983 | 0.2616 | 0.1175 | 0.4227 | 0.4274 | 0.3060 | 0.0517 | 0.2149 |
| Feliformia | Felidae        | Sambar papulator MH781700_1          | 0.3194 | 0.2680 | 0.1249 | 0.2908 | 0.3209 | 0.2506 | 0.2066 | 0.2219 | 0.1985 | 0.2665 | 0.1183 | 0.4155 | 0.4253 | 0.2899 | 0.0498 | 0.2331 |
| Feliformia | Herpestidae    | Atilax paladinosus T606_1            | 0.3160 | 0.2860 | 0.1290 | 0.2689 | 0.3213 | 0.2558 | 0.2094 | 0.2136 | 0.1983 | 0.2649 | 0.1175 | 0.4193 | 0.4285 | 0.3374 | 0.0603 | 0.1738 |
| Feliformia | Herpestidae    | Bleocane nigrescens GLC15_1          | 0.3160 | 0.2791 | 0.1288 | 0.2761 | 0.3232 | 0.2510 | 0.2066 | 0.2191 | 0.1969 | 0.2649 | 0.1191 | 0.4191 | 0.4279 | 0.3213 | 0.0605 | 0.1902 |
| Feliformia | Herpestidae    | Crocosaurich platycephalus C7866_1   | 0.3244 | 0.2946 | 0.1223 | 0.2588 | 0.3263 | 0.2602 | 0.2033 | 0.2102 | 0.1988 | 0.2685 | 0.1178 | 0.4149 | 0.4279 | 0.3459 | 0.0458 | 0.1514 |
| Feliformia | Herpestidae    | Cynictis penicillata T375_1          | 0.3180 | 0.2754 | 0.1268 | 0.2798 | 0.3205 | 0.2485 | 0.2094 | 0.2216 | 0.1988 | 0.2660 | 0.1172 | 0.4179 | 0.4346 | 0.3116 | 0.0519 | 0.1999 |
| Feliformia | Herpestidae    | Galerella sanguinea T378_1           | 0.3154 | 0.2831 | 0.1306 | 0.2709 | 0.3185 | 0.2572 | 0.2113 | 0.2130 | 0.1972 | 0.2672 | 0.1183 | 0.4174 | 0.4304 | 0.3251 | 0.0622 | 0.1823 |
| Feliformia | Herpestidae    | Hologale parvula SR0637809_1         | 0.3194 | 0.2831 | 0.1271 | 0.2684 | 0.3235 | 0.2558 | 0.2088 | 0.2149 | 0.1972 | 0.2666 | 0.1197 | 0.4166 | 0.4374 | 0.3230 | 0.0558 | 0.1738 |
| Feliformia | Herpestidae    | Herpestes brachyurus KY117547_1      | 0.3213 | 0.2738 | 0.1241 | 0.2808 | 0.3246 | 0.2491 | 0.2088 | 0.2205 | 0.1977 | 0.2641 | 0.1172 | 0.4210 | 0.4415 | 0.3083 | 0.0494 | 0.2008 |
| Feliformia | Herpestidae    | Herpestes javanicus NC006835_1       | 0.3189 | 0.2739 | 0.1267 | 0.2806 | 0.3227 | 0.2488 | 0.2074 | 0.2211 | 0.1972 | 0.2650 | 0.1180 | 0.4198 | 0.4368 | 0.3079 | 0.0545 | 0.2009 |
| Feliformia | Herpestidae    | Herpestes javanicus T413_1           | 0.3172 | 0.2743 | 0.1280 | 0.2805 | 0.3232 | 0.2485 | 0.2072 | 0.2211 | 0.1972 | 0.2638 | 0.1186 | 0.4204 | 0.4313 | 0.3105 | 0.0583 | 0.1999 |
| Feliformia | Herpestidae    | Herpestes naso C07XAR110_1           | 0.3134 | 0.2843 | 0.1311 | 0.2712 | 0.3210 | 0.2535 | 0.2097 | 0.2158 | 0.1975 | 0.2674 | 0.1180 | 0.4171 | 0.4218 | 0.3319 | 0.0655 | 0.1808 |
| Feliformia | Herpestidae    | Herpestes semitorquatus MH464789_1   | 0.3191 | 0.2884 | 0.1255 | 0.2671 | 0.3244 | 0.2577 | 0.2049 | 0.2130 | 0.1966 | 0.2680 | 0.1183 | 0.4171 | 0.4363 | 0.3394 | 0.0533 | 0.1711 |
| Feliformia | Herpestidae    | Ichnomys albicaudus T603_1           | 0.3183 | 0.2778 | 0.1271 | 0.2768 | 0.3221 | 0.2533 | 0.2080 | 0.2166 | 0.1977 | 0.2672 | 0.1178 | 0.4174 | 0.4351 | 0.3131 | 0.0555 | 0.1963 |
| Feliformia | Herpestidae    | Mungos mungo MMTCT_1                 | 0.3271 | 0.2821 | 0.1200 | 0.2708 | 0.3277 | 0.2555 | 0.2019 | 0.2149 | 0.1988 | 0.2683 | 0.1178 | 0.4152 | 0.4549 | 0.3227 | 0.0403 | 0.1822 |
| Feliformia | Herpestidae    | Mungos mungo SR7704821_1             | 0.3230 | 0.2821 | 0.1240 | 0.2709 | 0.3257 | 0.2527 | 0.2033 | 0.2183 | 0.1977 | 0.2691 | 0.1186 | 0.4146 | 0.4454 | 0.3246 | 0.0503 | 0.1797 |
| Feliformia | Herpestidae    | Suricata suricatta SSM10_1           | 0.3193 | 0.2829 | 0.1249 | 0.2730 | 0.3235 | 0.2574 | 0.2038 | 0.2152 | 0.1986 | 0.2683 | 0.1178 | 0.4154 | 0.4357 | 0.3230 | 0.0530 | 0.1883 |
| Feliformia | Hyenidae       | Crocuta crocuta NC020670_3           | 0.3080 | 0.2989 | 0.1354 | 0.2577 | 0.3185 | 0.2647 | 0.2102 | 0.2066 | 0.1966 | 0.2735 | 0.1194 | 0.4104 | 0.4088 | 0.3585 | 0.0767 | 0.1561 |
| Feliformia | Hyenidae       | Hyena hyena NC020669_1               | 0.3077 | 0.2921 | 0.1352 | 0.2650 | 0.3169 | 0.2630 | 0.2113 | 0.2091 | 0.1966 | 0.2697 | 0.1183 | 0.4154 | 0.4096 | 0.3455 | 0.0764 | 0.1705 |
| Feliformia | Hyenidae       | Parahyaena brunnea NC038159_15       | 0.3069 | 0.2974 | 0.1362 | 0.2596 | 0.3160 | 0.2647 | 0.2113 | 0.2080 | 0.1975 | 0.2708 | 0.1172 | 0.4146 | 0.4071 | 0.3569 | 0.0800 | 0.1561 |
| Feliformia | Hyenidae       | Proteles cristata T393_6             | 0.3033 | 0.2992 | 0.1390 | 0.2585 | 0.3130 | 0.2624 | 0.2149 | 0.2097 | 0.1955 | 0.2719 | 0.1191 | 0.4135 | 0.4016 | 0.3632 | 0.0830 | 0.1522 |
| Feliformia | Nandiniidae    | Nandina bitata NC024567_1            | 0.3218 | 0.2901 | 0.1174 | 0.2708 | 0.3207 | 0.2510 | 0.2061 | 0.2222 | 0.1975 | 0.2663 | 0.1169 | 0.4193 | 0.4471 | 0.3530 | 0.0292 | 0.1708 |
| Feliformia | Prionodontidae | Prionodon linsang ERR2391707_1       | 0.3130 | 0.2496 | 0.1254 | 0.3120 | 0.3191 | 0.2358 | 0.2097 | 0.2355 | 0.1969 | 0.2627 | 0.1172 | 0.4232 | 0.4229 | 0.2502 | 0.0494 | 0.2774 |
| Feliformia | Prionodontidae | Prionodon pardicolor NC024569_2      | 0.3095 | 0.2610 | 0.1277 | 0.3020 | 0.3185 | 0.2407 | 0.2108 | 0.2305 | 0.1947 | 0.2633 | 0.1186 | 0.4235 | 0.4152 | 0.2794 | 0.0536 | 0.2519 |
| Feliformia | Viverridae     | Acictis binnurus T605_2              | 0.3216 | 0.2428 | 0.1170 | 0.3186 | 0.3210 | 0.2283 | 0.2041 | 0.2466 | 0.1988 | 0.2627 | 0.1161 | 0.4224 | 0.4449 | 0.2374 | 0.0308 | 0.2869 |
| Feliformia | Viverridae     | Chrotogale owstoni T607_1            | 0.3232 | 0.2544 | 0.1151 | 0.3074 | 0.3244 | 0.2294 | 0.2020 | 0.2443 | 0.1977 | 0.2616 | 0.1164 | 0.4243 | 0.4474 | 0.2722 | 0.0269 | 0.2535 |
| Feliformia | Viverridae     | Civettictis civetta GLC19_1          | 0.3088 | 0.2700 | 0.1251 | 0.2961 | 0.3199 | 0.2519 | 0.2055 | 0.2227 | 0.1950 | 0.2647 | 0.1189 | 0.4216 | 0.4116 | 0.2935 | 0.0508 | 0.2441 |
| Feliformia | Viverridae     | Civettictis civetta NC033378_1       | 0.3079 | 0.2708 | 0.1261 | 0.2953 | 0.3194 | 0.2522 | 0.2062 | 0.2223 | 0.1950 | 0.2639 | 0.1189 | 0.4222 | 0.4093 | 0.2965 | 0.0531 | 0.2412 |
| Feliformia | Viverridae     | Cynogale bennetti KY117544_1         | 0.3251 | 0.2337 | 0.1123 | 0.3290 | 0.3294 | 0.2172 | 0.1988 | 0.2547 | 0.1981 | 0.2595 | 0.1153 | 0.4271 | 0.4477 | 0.2244 | 0.0228 | 0.3052 |
| Feliformia | Viverridae     | Diplogale hosei MH464790_1           | 0.3227 | 0.2481 | 0.1137 |        |        |        |        |        |        |        |        |        |        |        |        |        |
