# Supplementary material for: Evolutionary history of Carnivora (Mammalia, Laurasiatheria) inferred from mitochondrial genomes
Source: PubMed Central journal article supplement (PMC7886153; doi:10.1371/journal.pone.0240770), 2021-02-16
Supplement: pone.0240770.s004.pdf [file pone.0240770.s004.pdf]

## **S4 Appendix. Distances**

### **Evolutionary history of Carnivora (Mammalia, Laurasiatheria) inferred from mitochondrial genomes**

Alexandre Hassanin<sup>1\*</sup>, Géraldine Veron<sup>1</sup>, Anne Ropiquet<sup>2</sup>, Bettine Jansen van Vuuren<sup>3</sup>, Alexis Lécu<sup>4</sup>, Steven M. Goodman<sup>5</sup>, Jibrán Haider<sup>1,6,7</sup>, Trung Thanh Nguyen<sup>1</sup>

<sup>1</sup> Institut de Systématique, Évolution, Biodiversité (ISYEB), Sorbonne Université, MNHN, CNRS, EPHE, UA, Paris.

<sup>2</sup> Department of Natural Sciences, Faculty of Science and Technology, Middlesex University, United Kingdom.

<sup>3</sup> Centre for Ecological Genomics and Wildlife Conservation, Department of Zoology, University of Johannesburg, South Africa.

<sup>4</sup> Parc zoologique de Paris, Muséum national d'Histoire naturelle, Paris.

<sup>5</sup> Field Museum of Natural History, Chicago, IL, USA.

<sup>6</sup> Department of Wildlife Management, Pir Mehr Ali Shah, Arid Agriculture University Rawalpindi, Pakistan.

<sup>7</sup> Forest Parks & Wildlife Department Gilgit-Baltistan, Pakistan.

\* Correspondence: [alexandre.hassanin@mnhn.fr](mailto:alexandre.hassanin@mnhn.fr)

| T1                                       | T2                                     | p-distance |
|------------------------------------------|----------------------------------------|------------|
| Ursus maritimus NC003428 31              | Ursus maritimus GU573488 Svalbard      | 0,00276076 |
| Ursus maritimus GU573488 Svalbard        | Ursus arctos GU573486 5                | 0,00356893 |
| Urocyon littoralis catalinae KP129018 15 | Urocyon cinereoargenteus NC026723 21   | 0,00410691 |
| Zalophus wollbeaeki SRR4431565 1         | Zalophus californianus NC008416 1      | 0,00491354 |
| Ursus maritimus NC003428 31              | Ursus arctos GU573486 5                | 0,00579111 |
| Felis silvestris lybica KP202275 4       | Felis catus NC001700 2                 | 0,00720442 |
| Ursus maritimus GU573488 Svalbard        | Ursus arctos EU497665 29               | 0,01010033 |
| Ursus thibetanus thibetanus NC011118 4   | Ursus thibetanus formosanus NC009331 1 | 0,01010148 |
| Prionailurus planiceps NC028312 6        | Prionailurus planiceps KY682741 4      | 0,01070563 |
| Ursus arctos GU573491 207                | Ursus arctos AP012576 6                | 0,01077421 |
| Civettictis civetta NC003378 11          | Civettictis civetta GLC19 1            | 0,01117999 |
| Ailurus fulgens styani NC009691 1        | Ailurus fulgens NC011124 1             | 0,01137817 |
| Mustela sibirica NC020637 6              | Mustela sibirica AP017394 11           | 0,01158095 |
| Panthera pardus japonensis KJ866876 8    | Panthera pardus NC010641 5             | 0,01151593 |
| Procyon lotor AB462049 4                 | Procyon lotor AB462046 3               | 0,01177737 |
| Mustela putorius NC020638 4              | Mustela eversmannii NC028013 1         | 0,01191277 |
| Ursus maritimus NC003428 31              | Ursus arctos EU497665 29               | 0,01218773 |
| Ursus arctos GU573486 5                  | Ursus arctos EU497665 29               | 0,01245759 |
| Ursus spelaeus NC011112 8                | Ursus spelaeus EU327344 13             | 0,01292842 |
| Ursus arctos pruinus MG066703 3          | Ursus arctos GU573491 207              | 0,01313112 |
| Arctocepalus forsteri KT693377 17        | Arctocepalus australis MG023139 1      | 0,01332436 |
| Ursus thibetanus thibetanus NC011118 4   | Ursus thibetanus mupinensis NC008753 2 | 0,01407421 |
| Ursus arctos pruinus MG066703 3          | Ursus arctos AP012576 6                | 0,01420912 |
| Panthera uncia NC010638 1                | Panthera uncia KP202269 1              | 0,01568812 |
| Mustela putorius NC020638 4              | Mustela nigripes NC024942 1            | 0,0158837  |
| Ursus thibetanus mupinensis NC008753 2   | Ursus thibetanus formosanus NC009331 1 | 0,01663291 |
| Panthera tigris amoyensis NC014770 2     | Panthera tigris NC010642 35            | 0,01676429 |
| Arctocepalus forsteri NC04023 28         | Arctocepalus forsteri KT693377 17      | 0,01694201 |
| Ursus maritimus GU573488 Svalbard        | Ursus arctos GU573491 207              | 0,01723779 |
| Felis silvestris lybica KP202275 4       | Felis margarita NC028308 1             | 0,01730407 |
| Mustela nigripes NC024942 1              | Mustela eversmannii NC028013 1         | 0,01736438 |
| Ursus maritimus GU573488 Svalbard        | Ursus arctos pruinus MG066703 3        | 0,0179121  |
| Ursus thibetanus thibetanus NC011118 4   | Ursus thibetanus laniger MH281753 2    | 0,01811571 |
| Ursus arctos pruinus MG066703 3          | Ursus arctos EU497665 29               | 0,01865284 |
| Ursus thibetanus laniger MH281753 2      | Ursus thibetanus formosanus NC009331 1 | 0,01865414 |
| Ursus arctos GU573491 207                | Ursus arctos EU497665 29               | 0,01878661 |
| Phoca vitulina NC001325 1                | Phoca largha NC008430 1                | 0,01898862 |
| Ursus maritimus GU573488 Svalbard        | Ursus arctos AP012576 6                | 0,01898945 |
| Martes zibellina NC011579 39             | Martes martes T302 3                   | 0,01904667 |
| Ursus maritimus NC003428 31              | Ursus arctos GU573491 207              | 0,01919063 |
| Ursus maritimus NC003428 31              | Ursus arctos pruinus MG066703 3        | 0,01932622 |
| Panthera onca NC022842 1                 | Panthera onca KP202264 2               | 0,01952673 |
| Felis margarita NC028308 1               | Felis catus NC001700 2                 | 0,01966065 |
| Ursus arctos GU573491 207                | Ursus arctos GU573486 5                | 0,01966281 |
| Ursus arctos pruinus MG066703 3          | Ursus arctos GU573486 5                | 0,0200677  |
| Ursus arctos EU497665 29                 | Ursus arctos AP012576 6                | 0,02026886 |
| Arctocepalus forsteri NC04023 28         | Arctocepalus australis MG023139 1      | 0,02072217 |
| Lutra lutra NC011358 9                   | Lutra lutra LC050126 1                 | 0,02086278 |
| Ursus maritimus NC003428 31              | Ursus arctos AP012576 6                | 0,02094227 |
| Ursus arctos GU573486 5                  | Ursus arctos AP012576 6                | 0,02114533 |
| Ursus maritimus GU573488 Svalbard        | Ursus arctos isabellinus 1885 2        | 0,02181671 |
| Melogale moschata V0735A 1               | Melogale moschata NC020644 1           | 0,02200784 |
| Ursus thibetanus mupinensis NC008753 2   | Ursus thibetanus laniger MH281753 2    | 0,02255912 |
| Pusa sibirica NC008432 2                 | Pusa caspica NC008431 1                | 0,02269055 |
| Ursus arctos isabellinus 1885 2          | Ursus arctos EU497665 29               | 0,02269207 |
| Ursus arctos isabellinus 1885 2          | Ursus arctos GU573491 207              | 0,02269207 |
| Ursus arctos isabellinus 1885 2          | Ursus arctos AP012576 6                | 0,0233666  |
| Ursus arctos pruinus MG066703 3          | Ursus arctos isabellinus 1885 2        | 0,02336661 |
| Ursus arctos isabellinus 1885 2          | Ursus arctos GU573486 5                | 0,02350124 |
| Ursus maritimus NC003428 31              | Ursus arctos isabellinus 1885 2        | 0,02376944 |
| Pusa sibirica NC008432 2                 | Pusa hispida NC 008433 1               | 0,02478088 |
| Viverricula indica KX891751 1            | Viverricula indica KX891745 1          | 0,02545283 |
| Pusa sibirica NC008432 2                 | Halichoerus grypus NC001602 2          | 0,02566114 |
| Salanoia concolor D378 1                 | Mungotictis decemlineata NC027828 1    | 0,02585336 |
| Canis lupus familiaris NC002008 1231     | Canis lupus chanco NC010340 4          | 0,02613532 |
| Pusa caspica NC008431 1                  | Halichoerus grypus NC001602 2          | 0,0266041  |
| Pusa hispida NC 008433 1                 | Pusa caspica NC008431 1                | 0,02700287 |
| Panthera leo spelaea KX258452 2          | Panthera leo NERO 19                   | 0,02728407 |
| Leopardus guigna NC028321 1              | Leopardus geoffroyi NC028320 1         | 0,02746292 |
| Canis lupus chanco NC010340 4            | Canis anthus NC027956 2                | 0,02760988 |
| Melogale moschata NC020644 1             | Melogale moschata KP726273 1           | 0,02766136 |
| Martes melampus NC009678 1               | Martes martes T302 3                   | 0,02772895 |
| Pusa sibirica NC008432 2                 | Phoca largha NC008430 1                | 0,02801138 |
| Canis lupus familiaris NC002008 1231     | Canis anthus NC027956 2                | 0,02821613 |
| Mustela sibirica NC020637 6              | Mustela putorius NC020638 4            | 0,02867142 |
| Melogale moschata V0735A 1               | Melogale moschata KP726273 1           | 0,02873679 |
| Mustela sibirica AP017394 11             | Mustela nigripes NC024942 1            | 0,02894064 |
| Mustela sibirica NC020637 6              | Mustela nigripes NC024942 1            | 0,02894064 |
| Paradoxurus hermaphroditus NLNC 1        | Paradoxurus hermaphroditus NC039591 1  | 0,02915629 |
| Martes zibellina NC011579 39             | Martes melampus NC009678 1             | 0,02954438 |
| Mustela sibirica AP017394 11             | Mustela putorius NC020638 4            | 0,02961368 |
| Viverricula indica NC025296 2            | Viverricula indica KX891745 1          | 0,02962831 |
| Pusa hispida NC 008433 1                 | Halichoerus grypus NC001602 2          | 0,02983977 |
| Pusa caspica NC008431 1                  | Phoca largha NC008430 1                | 0,03009887 |
| Leopardus pardalis T262 1                | Leopardus pardalis NC028315 1          | 0,03016226 |
| Meles leucurus NC039173 4                | Meles anakuma NC009677 1               | 0,03041928 |
| Viverricula indica NC025296 2            | Viverricula indica KX891751 1          | 0,03050338 |
| Mustela sibirica NC020637 6              | Mustela eversmannii NC028013 1         | 0,03062323 |
| Pusa sibirica NC008432 2                 | Phoca vitulina NC001325 1              | 0,03070495 |
| Lynx lynx NC027083 4                     | Lynx canadensis NC028313 1             | 0,03083376 |
| Mirounga leonina NC008422 1              | Mirounga angustirostris SRR10331586 1  | 0,03110987 |
| Lynx pardinus NC028319 161               | Lynx canadensis NC028313 1             | 0,03124158 |
| Mustela sibirica AP017394 11             | Mustela eversmannii NC028013 1         | 0,03149818 |
| Pusa caspica NC008431 1                  | Phoca vitulina NC001325 1              | 0,03158041 |
| Pusa hispida NC 008433 1                 | Phoca largha NC008430 1                | 0,03286348 |
| Phoca largha NC008430 1                  | Halichoerus grypus NC001602 2          | 0,03300044 |
| Lynx pardinus NC028319 161               | Lynx lynx NC027083 4                   | 0,03339618 |
| Prionailurus viverrinus NC028305 1       | Prionailurus bengalensis CKM45 20      | 0,03366672 |
| Pusa hispida NC 008433 1                 | Phoca vitulina NC001325 1              | 0,03387352 |
| Phoca vitulina NC001325 1                | Halichoerus grypus NC001602 2          | 0,03388003 |
| Vulpes ferratilis NC027935 1             | Vulpes corsac NC023958 1               | 0,03480778 |
| Canis lupus chanco NC010340 4            | Canis aureus KT448274 1                | 0,03516817 |

| T1                                     | T2                                     | p-distance |
|----------------------------------------|----------------------------------------|------------|
| Lynx lynx NC027083 4                   | Gulo gulo NC009685 3                   | 0,1817112  |
| Prionailurus planiceps KY682741 4      | Canis lupus chanco NC010340 4          | 0,18171173 |
| Melogale moschata KP726273 1           | Conepatus ching NC042596 1             | 0,18171516 |
| Lynx canadensis NC028313 1             | Eumetopias jubatus NC004030 10         | 0,18171641 |
| Lynx pardinus NC028319 161             | Eumetopias jubatus NC004030 10         | 0,18171696 |
| Monachus monachus NC044972 5           | Crocota crocata NC020670 3             | 0,18171942 |
| Martes foina NC020643 1                | Genetta abyssinica MG489822 1          | 0,18172349 |
| Mustela kathiah NC023210 1             | Crossarchus platycephalus C7R66 1      | 0,18172356 |
| Meles meles T303 3                     | Xenogale naso C07XAR110 1              | 0,18172358 |
| Viverricula indica KX891745 1          | Lutra lutra LC050126 1                 | 0,18172398 |
| Mustela itatsi NC034330 19             | Arctocepalus gazella BK010918 1        | 0,18172486 |
| Potos flavus T414 1                    | Arctocepalus towmsendi NC008420 1      | 0,18172564 |
| Crossarchus platycephalus C7R66 1      | Arctocepalus forsteri KT693377 17      | 0,18172604 |
| Martes americana NC020642 1            | Arctocepalus gazella BK010918 1        | 0,18172607 |
| Nasua nasua NC020647 1                 | Erignathus barbatus NC008426 1         | 0,18172666 |
| Genetta servalina NC024568 2           | Enhydra lutris NC009692 1              | 0,18172836 |
| Mustela kathiah NC023210 1             | Arctocepalus pusillus NC008417 1       | 0,18173002 |
| Mirounga leonina NC008422 1            | Galidia elegans D146 1                 | 0,18173079 |
| Ursus putorius NC020638 4              | Genetta abyssinica MG489822 1          | 0,18173105 |
| Lutra lutra LC050126 1                 | Catopuma badia NC028300 1              | 0,18173154 |
| Arctocepalus forsteri NC024942 1       | Canis anthus NC027956 2                | 0,18173207 |
| Potos flavus T414 1                    | Arctocepalus pusillus NC008417 1       | 0,1817327  |
| Martes zibellina NC011579 39           | Arctotherium sp NC030174 1             | 0,18173391 |
| Lutra lutra NC011358 9                 | Leopardus geoffroyi NC028320 1         | 0,18173435 |
| Meles anakuma NC009677 1               | Felis margarita NC028308 1             | 0,18173487 |
| Martes americana NC020642 1            | Civettictis civetta GLC19 1            | 0,18173499 |
| Pusa caspica NC008431 1                | Paradoxurus hermaphroditus NLNC 1      | 0,18173501 |
| Neovison vison NC020641 3              | Mungos mungo/gambianus SRR77048        | 0,1817354  |
| Martes melampus NC009678 1             | Lynx rufus NC014456 3                  | 0,18173613 |
| Phocarcus hookeri NC008418 1           | Neovison vison NC020641 3              | 0,18173625 |
| Panthera onca KP202264 2               | Mustela frenata NC020640 1             | 0,1817369  |
| Mustela sibirica AP017394 11           | Leopardus tigrinus NC028317 1          | 0,18173741 |
| Paradoxurus jerdoni MH464793 19        | Mustela itatsi NC034330 19             | 0,18173794 |
| Mustela eversmannii NC028013 1         | Felis silvestris lybica KP202275 4     | 0,18173796 |
| Civettictis civetta GLC19 1            | Ailurus fulgens styani NC009691 1      | 0,18173853 |
| Speothos venaticus C48 2               | Erignathus barbatus NC008426 1         | 0,18173887 |
| Vulpes vulpes NC008434 5               | Leopardus pardalis T262 1              | 0,18173994 |
| Vulpes vulpes NC008434 5               | Puma yagouaroundi NC028311 1           | 0,18174011 |
| Mustela itatsi NC034330 19             | Catopuma badia NC028300 1              | 0,18174043 |
| Ursus thibetanus mupinensis NC008753 2 | Lutra sumatrana NC035810 1             | 0,18174084 |
| Martes americana NC020642 1            | Leopardus wiedii NC028318 1            | 0,18174095 |
| Melogale moschata V0735A 1             | Leopardus geoffroyi NC028320 1         | 0,18174128 |
| Puma concolor NC016470 22              | Canis aureus KT448274 1                | 0,18174152 |
| Prionailurus rubiginosus NC028304 2    | Canis anthus NC027956 2                | 0,18174182 |
| Potos flavus T414 1                    | Leopardus guigna NC028321 1            | 0,18174185 |
| Prionailurus viverrinus NC028305 1     | Martes americana NC020642 1            | 0,18174192 |
| Ursus arctos EU497665 29               | Ailurus fulgens styani NC009691 1      | 0,18174219 |
| Puma concolor NC016470 22              | Canis latrans NC008093 7               | 0,18174236 |
| Vulpes vulpes NC008434 5               | Prionailurus bengalensis CKM45 20      | 0,18174319 |
| Ursus arctos GU573491 207              | Mustela kathiah NC023210 1             | 0,18174334 |
| Ursus maritimus NC003428 31            | Arctocepalus pusillus NC008417 1       | 0,18174355 |
| Ursus arctos isabellinus 1885 2        | Mustela eversmannii NC028013 1         | 0,18174398 |
| Ursus arctos isabellinus 1885 2        | Mustela nigripes NC024942 1            | 0,18174468 |
| Ursus spelaeus EU327344 13             | Eumetopias jubatus NC004030 10         | 0,18174508 |
| Ursus arctos isabellinus 1885 2        | Melogale moschata NC020644 1           | 0,18174523 |
| Procyon lotor AB462046 3               | Prionailurus rubiginosus NC028304 2    | 0,18174548 |
| Viverra zibetha T609 1                 | Ursus arctos isabellinus 1885 2        | 0,18174554 |
| Mustela altaica NC021751 1             | Leopardus jacobita NC028322 1          | 0,18174598 |
| Martes flavigula NC012141 3            | Civettictis civetta NC033378 1         | 0,18174653 |
| Paradoxurus jerdoni MH464793 19        | Arctodus simus NC011116 1              | 0,18174711 |
| Ursus thibetanus formosanus NC009331 1 | Martes zibellina NC011579 39           | 0,1817472  |
| Lutra lutra LC050126 1                 | Arctocepalus forsteri NC04023 28       | 0,18174732 |
| Mustela altaica NC021751 1             | Catopuma temminckii NC027115 41        | 0,18174821 |
| Zalophus californianus NC008416 1      | Homotherium latidens MF871702 3        | 0,18174857 |
| Mustela nivalis T306 5                 | Canis aureus KT448274 1                | 0,18174887 |
| Panthera uncia NC010638 1              | Monachus schauinslandi NC008421 1      | 0,18174888 |
| Ursus thibetanus formosanus NC009331 1 | Fossa fossana D350 1                   | 0,18174888 |
| Procyon lotor AB462049 4               | Prionailurus bengalensis CKM45 20      | 0,18174908 |
| Neovison vison NC020641 3              | Felis silvestris lybica KP202275 4     | 0,18174954 |
| Prionailurus planiceps NC028312 6      | Canis aureus KT448274 1                | 0,1817497  |
| Ursus arctos GU573486 5                | Mustela eversmannii NC028013 1         | 0,18175013 |
| Ursus arctos GU573486 5                | Mustela nigripes NC024942 1            | 0,18175083 |
| Martes foina NC020643 1                | Felis catus NC001700 2                 | 0,18175267 |
| Puma yagouaroundi NC028311 1           | Bassariscus sumichrasti SRR1099089 1   | 0,18175267 |
| Ursus thibetanus formosanus NC009331 1 | Arctocepalus pusillus NC008417 1       | 0,18175425 |
| Ursus arctos AP012576 6                | Meles leucurus NC039173 4              | 0,18175487 |
| Phoca vitulina NC001325 1              | Chrysocyon brachyurus NC024172 1       | 0,18175505 |
| Martes flavigula NC012141 3            | Hemigalus derbyanus MH464791 1         | 0,18175626 |
| Viverra zibetha T609 1                 | Ursus thibetanus formosanus NC009331 1 | 0,18175647 |
| Ursus spelaeus NC011112 8              | Mustela itatsi NC034330 19             | 0,18175744 |
| Ictonyx striatus T299 1                | Arctodus simus NC011116 1              | 0,18175825 |
| Proteles cristata T393 6               | Phoca largha NC008430 1                | 0,181759   |
| Viverricula indica KX891751 1          | Ursus thibetanus laniger MH281753 2    | 0,1817603  |
| Helarctos malayanus NC009968 2         | Genetta servalina NC024568 2           | 0,1817605  |
| Poecilogale albinucha T602 1           | Arctocepalus forsteri NC04023 28       | 0,18176156 |
| Zalophus californianus NC008416 1      | Ursus maritimus NC003428 31            | 0,18176273 |
| Vulpes ferratilis NC027935 1           | Monachus monachus NC044972 5           | 0,18176518 |
| Ursus thibetanus thibetanus NC011118 4 | Leopardus geoffroyi NC028320 1         | 0,1817676  |
| Ursus thibetanus mupinensis NC008      |                                        |            |

|                                       |                                       |            |
|---------------------------------------|---------------------------------------|------------|
| Prionailurus bengalensis NCO28301 12  | Prionailurus bengalensis CKM45 20     | 0,03575401 |
| Canis aureus KT448274 1               | Canis anthus NCO27956 2               | 0,03596906 |
| Canis lupus familiaris NCO02008 1231  | Canis aureus KT448274 1               | 0,03631193 |
| Leopardus wiedii NCO28318 1           | Leopardus pardalis T262 1             | 0,03635629 |
| Martes melampus NCO09678 1            | Martes americana NCO20642 1           | 0,03647621 |
| Martes martes T302 3                  | Martes americana NCO20642 1           | 0,03701676 |
| Leopardus wiedii NCO28318 1           | Leopardus pardalis NCO28315 1         | 0,03723153 |
| Martes zibellina NCO11579 39          | Martes americana NCO20642 1           | 0,03916818 |
| Prionailurus viverrinus NCO28305 1    | Prionailurus bengalensis NCO28301 12  | 0,04033174 |
| Canis latrans NCO08093 7              | Canis aureus KT448274 1               | 0,04035241 |
| Canis lupus familiaris NCO02008 1231  | Canis latrans NCO08093 7              | 0,04175084 |
| Canis lupus chanco NCO10340 4         | Canis latrans NCO08093 7              | 0,04215762 |
| Canis latrans NCO08093 7              | Canis anthus NCO27956 2               | 0,04268498 |
| Urva javanica T413 1                  | Urva javanica/auropunctata NCO06835 1 | 0,04478869 |
| Mustela nigripes NCO24942 1           | Mustela itatsi NCO34330 19            | 0,04509355 |
| Arctocepalus gazella BK010918 1       | Arctocepalus forsteri KT693377 17     | 0,04542396 |
| Leptonyx chotes weddellii NCO08424 1  | Hydrurga leptonyx NCO08425 1          | 0,04578814 |
| Mustela putorius NCO20638 4           | Mustela itatsi NCO34330 19            | 0,0460358  |
| Genetta servalina NCO24568 2          | Genetta genetta T297 1                | 0,04646155 |
| Arctocepalus gazella BK010918 1       | Arctocepalus forsteri NCO04023 28     | 0,04657369 |
| Mustela itatsi NCO34330 19            | Mustela evermanni NCO28013 1          | 0,04664154 |
| Arctocepalus gazella BK010918 1       | Arctocepalus australis MGO23139 1     | 0,04676985 |
| Mustela sibirica NCO20637 6           | Mustela itatsi NCO34330 19            | 0,04691076 |
| Mustela sibirica AP017394 11          | Mustela itatsi NCO34330 19            | 0,04704536 |
| Arctocepalus townsendi NCO08420 1     | Arctocepalus australis MGO23139 1     | 0,04777927 |
| Arctocepalus townsendi NCO08420 1     | Arctocepalus forsteri KT693377 17     | 0,04892328 |
| Crossarchus platycephalus C7R66 1     | Arctocepalus gazella BK010918 1       | 0,04892332 |
| Leopardus tigrinus NCO28317 1         | Leopardus guigna NCO28321 1           | 0,04955228 |
| Lutra sumatrana NCO35810 1            | Lutra lutra NCO11358 9                | 0,04959957 |
| Arctocepalus townsendi NCO08420 1     | Arctocepalus forsteri NCO04023 28     | 0,05055553 |
| Ursus spelaeus EU327344 13            | Ursus maritimus GU573488 Svalbard     | 0,05077594 |
| Ursus spelaeus NCO11112 8             | Ursus maritimus GU573488 Svalbard     | 0,05111229 |
| Lutra sumatrana NCO35810 1            | Lutra lutra LC050126 1                | 0,05128205 |
| Leopardus tigrinus NCO28317 1         | Leopardus geoffroyi NCO28320 1        | 0,05163994 |
| Ursus spelaeus EU327344 13            | Ursus arctos EU497665 29              | 0,05178951 |
| Ursus spelaeus EU327344 13            | Ursus arctos GU573486 5               | 0,05195901 |
| Ursus spelaeus NCO11112 8             | Ursus arctos GU573486 5               | 0,05232691 |
| Ursus spelaeus EU327344 13            | Ursus maritimus NCO03428 31           | 0,05259421 |
| Ursus spelaeus NCO11112 8             | Ursus maritimus NCO03428 31           | 0,05266117 |
| Ursus spelaeus EU327344 13            | Ursus arctos GU573491 207             | 0,05266176 |
| Ursus spelaeus EU327344 13            | Ursus arctos prunosus MGO66703 3      | 0,05273114 |
| Ursus spelaeus NCO11112 8             | Ursus arctos EU497665 29              | 0,05279567 |
| Ursus spelaeus NCO11112 8             | Ursus arctos GU573491 207             | 0,05279602 |
| Ursus spelaeus EU327344 13            | Ursus arctos AP012576 6               | 0,05313554 |
| Ursus spelaeus NCO11112 8             | Ursus arctos prunosus MGO66703 3      | 0,05353892 |
| Ursus spelaeus NCO11112 8             | Ursus arctos AP012576 6               | 0,05353913 |
| Ursus spelaeus NCO11112 8             | Ursus arctos isabellinus 1885 2       | 0,05367114 |
| Panthera pardus japonensis KJ866876 8 | Panthera leo NERO 19                  | 0,05374338 |
| Ursus spelaeus EU327344 13            | Ursus arctos isabellinus 1885 2       | 0,05400827 |
| Panthera pardus japonensis KJ866876 8 | Panthera leo spelaea KX258452 2       | 0,05442771 |
| Panthera pardus NCO10641 5            | Panthera leo NERO 19                  | 0,05516832 |
| Panthera pardus NCO10641 5            | Panthera leo spelaea KX258452 2       | 0,05517932 |
| Parahyaena brunnea NCO38159 15        | Hyena hyaena NCO20669 1               | 0,05588097 |
| Zalophus wollebaeki SRR4431565 1      | Eumetopias jubatus NCO04030 10        | 0,05621317 |
| Zalophus californianus NCO08416 1     | Eumetopias jubatus NCO04030 10        | 0,05628484 |
| Prionailurus planiceps KY682741 4     | Prionailurus bengalensis CKM45 20     | 0,05682891 |
| Prionailurus planiceps KY682741 4     | Prionailurus bengalensis NCO28301 12  | 0,05696202 |
| Prionailurus planiceps NCO28312 6     | Prionailurus bengalensis NCO28301 12  | 0,05736601 |
| Lutrogale perspicillata NCO35811 1    | Aonyx cinerea NCO35814 2              | 0,05801191 |
| Prionailurus planiceps NCO28312 6     | Prionailurus bengalensis CKM45 20     | 0,05817562 |
| Felis silvestris lybica KP202275 4    | Felis chaus NCO28307 1                | 0,0586453  |
| Paradoxurus jerdoni MH464793 1        | Paradoxurus hermaphroditus NLNC 1     | 0,05864925 |
| Salanoia concolor D378 1              | Galidictis fasciata DM333 1           | 0,05911264 |
| Prionailurus rubiginosus NCO28304 2   | Prionailurus bengalensis NCO28301 12  | 0,05931861 |
| Phoca groenlandica NCO08429 54        | Phoca fasciata NCO08428 1             | 0,05945728 |
| Prionailurus rubiginosus NCO28304 2   | Prionailurus bengalensis CKM45 20     | 0,05956703 |
| Phocarcctos hookeri NCO08418 1        | Arctocepalus australis MGO23139 1     | 0,05975774 |
| Catopuma temminckii NCO27115 41       | Catopuma badia NCO28300 1             | 0,06005925 |
| Phocarcctos hookeri NCO08418 1        | Arctocepalus forsteri KT693377 17     | 0,0602961  |
| Felis chaus NCO28307 1                | Felis chaus NCO01700 2                | 0,06039591 |
| Neophoca cinerea NCO08419 1           | Arctocepalus australis MGO23139 1     | 0,06049798 |
| Prionailurus viverrinus NCO28305 1    | Prionailurus planiceps KY682741 4     | 0,06059916 |
| Mungotictis decemlineata NCO27828 1   | Galidictis fasciata DM333 1           | 0,06072847 |
| Neophoca cinerea NCO08419 1           | Arctocepalus forsteri KT693377 17     | 0,06076716 |
| Felis margarita NCO28308 1            | Felis chaus NCO28307 1                | 0,06100189 |
| Felis silvestris lybica KP202275 4    | Felis nigripes NCO28309 1             | 0,06127121 |
| Paradoxurus jerdoni MH464793 1        | Paradoxurus hermaphroditus NCO39591 1 | 0,06134267 |
| Arctocepalus pusillus NCO08417 1      | Arctocepalus australis MGO23139 1     | 0,06144257 |
| Neophoca cinerea NCO08419 1           | Arctocepalus townsendi NCO08420 1     | 0,06150774 |
| Neophoca cinerea NCO08419 1           | Arctocepalus gazella BK010918 1       | 0,0615747  |
| Mustela nivalis T306 5                | Mustela altaica NCO21751 1            | 0,06158713 |
| Meles meles T303 3                    | Meles leucurus NCO39173 4             | 0,06164614 |
| Prionailurus viverrinus NCO28305 1    | Prionailurus planiceps NCO28312 6     | 0,06181117 |
| Felis nigripes NCO28309 1             | Felis chaus NCO28307 1                | 0,06201185 |
| Leopardus wiedii NCO28318 1           | Leopardus jacobita NCO28322 1         | 0,06214233 |
| Felis nigripes NCO28309 1             | Felis chaus NCO01700 2                | 0,06221384 |
| Arctocepalus pusillus NCO08417 1      | Arctocepalus forsteri KT693377 17     | 0,06225014 |
| Lobodon carcinophaga NCO08423 1       | Leptonyx chotes weddellii NCO08424 1  | 0,06235204 |
| Prionailurus rubiginosus NCO28304 2   | Prionailurus planiceps KY682741 4     | 0,06255505 |
| Leopardus pardalis NCO28315 1         | Leopardus jacobita NCO28322 1         | 0,06268894 |
| Leopardus pardalis T262 1             | Leopardus colocolo NCO28314 1         | 0,06268886 |
| Prionailurus viverrinus NCO28305 1    | Prionailurus rubiginosus NCO28304 2   | 0,06273536 |
| Neophoca cinerea NCO08419 1           | Arctocepalus forsteri NCO04023 28     | 0,06277481 |
| Phocarcctos hookeri NCO08418 1        | Arctocepalus townsendi NCO08420 1     | 0,06298789 |
| Leopardus pardalis T262 1             | Leopardus jacobita NCO28322 1         | 0,06301757 |
| Mungos mungo/gambianus SRR7704821 1   | Mungos mungo MMC7 1                   | 0,06302324 |
| Phocarcctos hookeri NCO08418 1        | Neophoca cinerea NCO08419 1           | 0,06305518 |
| Phocarcctos hookeri NCO08418 1        | Arctocepalus gazella BK010918 1       | 0,06305522 |
| Felis nigripes NCO28309 1             | Felis margarita NCO28308 1            | 0,06315648 |
| Prionailurus rubiginosus NCO28304 2   | Prionailurus planiceps NCO28312 6     | 0,06335847 |
| Leopardus pardalis NCO28315 1         | Leopardus colocolo NCO28314 1         | 0,06342494 |
| Phocarcctos hookeri NCO08418 1        | Arctocepalus forsteri NCO04023 28     | 0,06344817 |
| Arctocepalus pusillus NCO08417 1      | Arctocepalus gazella BK010918 1       | 0,06346168 |

|                                        |                                      |            |
|----------------------------------------|--------------------------------------|------------|
| Mustela sibirica AP017394 11           | Conepatus chinga NCO42596 1          | 0,18179241 |
| Tremarctos ornatus NCO09969 2          | Meles leucurus NCO39173 4            | 0,1817939  |
| Martes zibellina NCO11579 39           | Canis latrans NCO08093 7             | 0,18179442 |
| Lycalopex secureus KT448284 1          | Homotherium latidens MF871702 3      | 0,18179512 |
| Leopardus colocolo NCO28314 1          | Gulo gulo NCO09685 3                 | 0,18179622 |
| Taxidea taxus NCO20646 1               | Cynictis penicillata T375 1          | 0,18179695 |
| Tremarctos ornatus NCO09969 2          | Neophoca cinerea NCO08419 1          | 0,18179712 |
| Neophoca cinerea NCO08419 1            | Aillurus fulgens NCO11124 1          | 0,1817973  |
| Mustela altaica NCO21751 1             | Conepatus chinga NCO42596 1          | 0,18179779 |
| Procyon lotor AB462049 4               | Neophoca cinerea NCO08419 1          | 0,1817984  |
| Lycan pictus NCO28427 2                | Genetta abyssinica MG489822 1        | 0,18179874 |
| Mustela putorius NCO20638 4            | Canis latrans NCO08093 7             | 0,18179874 |
| Puma yagouaroundi NCO28311 1           | Lutra lutra NCO11358 9               | 0,18179911 |
| Genetta servalina NCO24568 2           | Conepatus chinga NCO42596 1          | 0,18179999 |
| Viverricula indica X891745 1           | Meles anakuma NCO09677 1             | 0,18180054 |
| Viverra tangalunga MH464792 1          | Otaria byronia OTAB 1                | 0,18180111 |
| Mungos mungo MMC7 1                    | Bassariscus sumichrasti SRX1099089 1 | 0,18180121 |
| Ommatophoca rossii AY377287etc 1       | Canis lupus chanco NCO10340 4        | 0,18180154 |
| Otocyon megalotis SAF 1 2              | Mirounga leonina NCO08422 1          | 0,18180194 |
| Viverra zibetha T609 1                 | Meles meles T303 3                   | 0,18180194 |
| Felis silvestris lybica KP202275 4     | Aillurus fulgens styani NCO09691 1   | 0,18180206 |
| Pusa caspica NCO08431 1                | Paradoxurus jerdoni MH464793 1       | 0,18180223 |
| Vulpes corsac NCO23958 1               | Viverricula indica X891751 1         | 0,18180329 |
| Vulpes ferrillata NCO27935 1           | Viverricula indica X891745 1         | 0,18180367 |
| Prionailurus bengalensis CKM45 20      | Lutra lutra NCO11358 9               | 0,18180379 |
| Phoca groenlandica NCO08429 54         | Canis anthus NCO27956 2              | 0,18180387 |
| Crossarchus platycephalus C7R66 1      | Canis aureus KT448274 1              | 0,18180425 |
| Paradoxurus hermaphroditus NLNC 1      | Mustela putorius NCO20638 4          | 0,18180434 |
| Viverra tangalunga MH464792 1          | Paguma larvata PDD5 1 2              | 0,18180473 |
| Mustela itatsi NCO34330 19             | Leopardus tigrinus NCO28317 1        | 0,18180487 |
| Tremarctos ornatus NCO09969 2          | Leptailurus serval NCO28316 1        | 0,1818051  |
| Mustela itatsi NCO34330 19             | Felis silvestris lybica KP202275 4   | 0,18180536 |
| Mustela kathiah NCO23210 1             | Felis chaus NCO28307 1               | 0,18180563 |
| Melogale moschata KP726273 1           | Felis nigripes NCO28309 1            | 0,18180679 |
| Prionailurus planiceps KY682741 4      | Martes americana NCO20642 1          | 0,18180738 |
| Mustela sibirica AP017394 11           | Leopardus guigna NCO28321 1          | 0,18180762 |
| Paradoxurus hermaphroditus NLNC 1      | Aillurus fulgens NCO11124 1          | 0,18180799 |
| Melogale moschata KP726273 1           | Leopardus guigna NCO28321 1          | 0,18180804 |
| Leopardus wiedii NCO28318 1            | Canis latrans NCO08093 7             | 0,18180846 |
| Otaria byronia OTAB 1                  | Aillurus fulgens NCO11124 1          | 0,18180847 |
| Viverricula indica X891745 1           | Mustela altaica NCO21751 1           | 0,18180856 |
| Ursus arctos GU573491 207              | Mustela sibirica AP017394 11         | 0,18180859 |
| Otocolobus manul NCO28323 1            | Canis anthus NCO27956 2              | 0,18181042 |
| Ursus arctos EU497665 29               | Mustela kathiah NCO23210 1           | 0,18181103 |
| Ursus maritimus NCO03428 31            | Mustela evermanni NCO28013 1         | 0,18181124 |
| Ursus maritimus GU573488 Svalbard      | Mustela evermanni NCO28013 1         | 0,18181133 |
| Ursus maritimus GU573488 Svalbard      | Mustela nigripes NCO24942 1          | 0,18181203 |
| Procyon lotor AB462049 4               | Leopardus wiedii NCO28318 1          | 0,18181315 |
| Mustela altaica NCO21751 1             | Felis chaus NCO01700 2               | 0,18181334 |
| Phoca largha NCO08430 1                | Paradoxurus hermaphroditus NLNC 1    | 0,18181364 |
| Phoca vitulina NCO01325 1              | Paradoxurus hermaphroditus NLNC 1    | 0,18181385 |
| Leptailurus serval NCO28316 1          | Arctocepalus pusillus NCO08417 1     | 0,18181394 |
| Melurus ursinus NCO09970 2             | Martes melampus NCO09678 1           | 0,18181483 |
| Ursus thibetanus thibetanus NCO11112 8 | Callorhinus ursinus NCO08415 1       | 0,18181515 |
| Leopardus pardalis NCO28315 1          | Canis aureus KT448274 1              | 0,18181527 |
| Viverricula indica NCO25296 2          | Mustela nivalis T306 5               | 0,18181564 |
| Lynx lynx NCO27083 4                   | Lycan pictus NCO28427 2              | 0,18181656 |
| Zalophus wollebaeki SRR4431565 1       | Canis adustus KT448271 1             | 0,18181705 |
| Lynx rufus NCO14456 3                  | Ictonyx striatus T299 1              | 0,18181929 |
| Leopardus geoffroyi NCO28320 1         | Arctodus simus NCO11116 1            | 0,18182045 |
| Prionailurus bengalensis CKM45 20      | Arctodus simus NCO11116 1            | 0,18182063 |
| Ursus spelaeus EU327344 13             | Mustela itatsi NCO34330 19           | 0,18182534 |
| Ursus spelaeus NCO11112 8              | Neophoca cinerea NCO08419 1          | 0,18182687 |
| Ursus americanus JX196366 3            | Martes flavigula NCO12141 3          | 0,18182817 |
| Mustela evermanni NCO28013 1           | Canis lupus familiaris NCO02008 1231 | 0,18183127 |
| Poecilogale albinucha T602 1           | Mephitis mephitis NCO20648 1         | 0,18183172 |
| Ommatophoca rossii AY377287etc 1       | Aillurogale melanoleuca NCO09492 5   | 0,18183233 |
| Zalophus wollebaeki SRR4431565 1       | Ursus spelaeus EU327344 13           | 0,18183373 |
| Melogale moschata KP726273 1           | Eumetopias jubatus NCO04030 10       | 0,18183407 |
| Priodonton linsang ERR2391707 1        | Monachus monachus NCO44972 5         | 0,18183528 |
| Viverricula indica X891745 1           | Martes flavigula NCO12141 3          | 0,18183583 |
| Mustela nivalis T306 5                 | Canis lupus familiaris NCO02008 1231 | 0,18184085 |
| Spilogale putorius NCO10497 1          | Homotherium latidens MF871702 3      | 0,18184203 |
| Martes americana NCO20642 1            | Civettictis civetta NCO33378 1       | 0,18184219 |
| Procyon lotor AB462049 4               | Canis adustus KT448271 1             | 0,18184271 |
| Mustela sibirica NCO20637 6            | Civettictis civetta NCO33378 1       | 0,18184395 |
| Leopardus pardalis T262 1              | Gulo gulo NCO09685 3                 | 0,18184544 |
| Prionailurus rubiginosus NCO28304 2    | Gulo gulo NCO09685 3                 | 0,18184608 |
| Chrotogale owstoni T607 1              | Callorhinus ursinus NCO08415 1       | 0,18184812 |
| Prionailurus bengalensis CKM45 20      | Gulo gulo NCO09685 3                 | 0,18184893 |
| Phoca groenlandica NCO08429 54         | Panthera pardus NCO10641 5           | 0,1818514  |
| Viverra tangalunga MH464792 1          | Diplogale hosei MH464790 1           | 0,18185355 |
| Martes melampus NCO09678 1             | Fossa fossana D350 1                 | 0,18185379 |
| Pusa hispida NCO08433 1                | Cuon alpinus NCO13445 3              | 0,18185484 |
| Meles meles T303 3                     | Arctocepalus gazella BK010918 1      | 0,18185523 |
| Meles meles T303 3                     | Crossarchus platycephalus C7R66 1    | 0,18185607 |
| Crossarchus platycephalus C7R66 1      | Callorhinus ursinus NCO08415 1       | 0,18185847 |
| Mustela kathiah NCO23210 1             | Uva semitorquata MH464789 1          | 0,18185972 |
| Vulpes vulpes NCO08434 5               | Mirounga leonina NCO08422 1          | 0,1818624  |
| Tremarctos ornatus NCO09969 2          | Bassariscus sumichrasti SRX1099089 1 | 0,18186343 |
| Melogale moschata NCO20644 1           | Chrotogale owstoni T607 1            | 0,18186432 |
| Mustela sibirica AP017394 11           | Canis latrans NCO08093 7             | 0,18186608 |
| Lutra lutra LC050126 1                 | Leptailurus serval NCO28316 1        | 0,18186678 |
| Felis chaus NCO01700 2                 | Enhydra lutris NCO09692 1            | 0,18186827 |
| Felis margarita NCO28308 1             | Enhydra lutris NCO09692 1            | 0,18186827 |
| Felis silvestris lybica KP202275 4     | Arctonyx collaris NCO20645 1         | 0,18186925 |
| Chrotogale owstoni T607 1              | Arctodus simus NCO11116 1            | 0,18186995 |
| Prionailurus planiceps KY682741 4      | Callorhinus ursinus NCO08415 1       | 0,18187062 |
| Viverricula indica X891745 1           | Mustela putorius NCO20638 4          | 0,18187085 |
| Lutra sumatrana NCO35810 1             | Catopuma badia NCO28300 1            | 0,18187111 |
| Lynx rufus NCO14456 3                  | Lutra sumatrana NCO35810 1           | 0,18187135 |
| Mustela evermanni NCO28013 1           | Genetta servalina NCO24568 2         | 0,18187162 |
| Paradoxurus jerdoni MH464793 1         | Mustela nigripes NCO24942 1          | 0,1818721  |

|                                        |                                       |            |
|----------------------------------------|---------------------------------------|------------|
| Leopardus wiedii NC028318 1            | Leopardus colocolo NC028314 1         | 0,06356341 |
| Meles meles T303 3                     | Meles anakuma NC009677 1              | 0,06406891 |
| Arctocepalus townsendi NC008420 1      | Arctocepalus pusillus NC008417 1      | 0,06420177 |
| Leopardus jacobita NC028322 1          | Leopardus colocolo NC028314 1         | 0,0644389  |
| Lobodon carinophaga NC008423 1         | Hydrurga leptonyx NC008425 1          | 0,06450744 |
| Arctocepalus pusillus NC008417 1       | Arctocepalus forsteri NC004023 28     | 0,0645345  |
| Leopardus wiedii NC028318 1            | Leopardus tigrinus NC028317 1         | 0,06470073 |
| Panthera onca NC022842 1               | Panthera leo NERO 19                  | 0,06492936 |
| Leopardus pardalis NC028315 1          | Leopardus geoffroyi NC028320 1        | 0,06497004 |
| Panthera pardus NC010641 5             | Panthera onca NC022842 1              | 0,06499299 |
| Leopardus pardalis NC028315 1          | Leopardus guigna NC028321 1           | 0,06510469 |
| Panthera uncia KP202269 1              | Panthera leo NERO 19                  | 0,06532627 |
| Leopardus tigrinus NC028317 1          | Leopardus pardalis T262 1             | 0,06582569 |
| Leopardus wiedii NC028318 1            | Leopardus geoffroyi NC028320 1        | 0,06550865 |
| Leopardus wiedii NC028318 1            | Leopardus guigna NC028321 1           | 0,06557598 |
| Genetta servalina NC024568 2           | Genetta abyssinica MG489822 1         | 0,06579403 |
| Otaria byronia OTAB 1                  | Arctocepalus australis MG023139 1     | 0,06581736 |
| Martes melampus NC009678 1             | Martes foina NC020643 1               | 0,06582569 |
| Phocarcos hookeri NC008418 1           | Arctocepalus pusillus NC008417 1      | 0,06595154 |
| Panthera onca NC022842 1               | Panthera leo spelaea KX258452 2       | 0,06595208 |
| Neophoca cinerea NC008419 1            | Arctocepalus pusillus NC008417 1      | 0,0660188  |
| Leopardus tigrinus NC028317 1          | Leopardus pardalis NC028315 1         | 0,06611459 |
| Leopardus pardalis T262 1              | Leopardus guigna NC028321 1           | 0,06631657 |
| Otaria byronia OTAB 1                  | Arctocepalus forsteri KT693377 17     | 0,06662494 |
| Leopardus pardalis T262 1              | Leopardus geoffroyi NC028320 1        | 0,06672053 |
| Panthera uncia KP202269 1              | Panthera leo spelaea KX258452 2       | 0,06675241 |
| Otaria byronia OTAB 1                  | Arctocepalus gazella BK010918 1       | 0,06675974 |
| Lynx rufus NC014456 3                  | Lynx canadensis NC028313 1            | 0,06692702 |
| Panthera uncia KP202269 1              | Panthera onca NC022842 1              | 0,06693207 |
| Martes martes T302 3                   | Martes foina NC020643 1               | 0,06703719 |
| Lynx rufus NC014456 3                  | Lynx lynx NC027083 4                  | 0,06706168 |
| Panthera uncia KP202269 1              | Panthera pardus japonensis KJ866876 8 | 0,06712901 |
| Panthera uncia KP202269 1              | Panthera pardus NC010641 5            | 0,0673449  |
| Martes foina NC020643 1                | Martes americana NC020642 1           | 0,06750403 |
| Martes zibellina NC011579 39           | Martes foina NC020643 1               | 0,06750407 |
| Leopardus jacobita NC028322 1          | Leopardus guigna NC028321 1           | 0,06759577 |
| Otaria byronia OTAB 1                  | Arctocepalus forsteri NC004023 28     | 0,06763686 |
| Panthera pardus japonensis KJ866876 8  | Panthera onca NC022842 1              | 0,06774062 |
| Lynx rufus NC014456 3                  | Lynx pardus NC028319 161              | 0,06827363 |
| Pusa sibirica NC008432 2               | Phoca fasciata NC008428 1             | 0,0683432  |
| Otaria byronia OTAB 1                  | Arctocepalus pusillus NC008417 1      | 0,06851067 |
| Otaria byronia OTAB 1                  | Arctocepalus townsendi NC008420 1     | 0,06864396 |
| Profelis aurata NC028299 1             | Caracal caracal NC028306 1            | 0,06867762 |
| Pusa caspica NC008431 1                | Phoca fasciata NC008428 1             | 0,06874716 |
| Zalophus wollebaeki SRR4431565 1       | Arctocepalus australis MG023139 1     | 0,0688474  |
| Leopardus jacobita NC028322 1          | Leopardus geoffroyi NC028320 1        | 0,06887498 |
| Leopardus guigna NC028321 1            | Leopardus colocolo NC028314 1         | 0,06888319 |
| Zalophus californianus NC008416 1      | Arctocepalus australis MG023139 1     | 0,06892014 |
| Pusa hispida NC 008433 1               | Phoca fasciata NC008428 1             | 0,06902138 |
| Panthera uncia NC010638 1              | Panthera leo NERO 19                  | 0,06909757 |
| Zalophus wollebaeki SRR4431565 1       | Arctocepalus gazella BK010918 1       | 0,06918448 |
| Leopardus tigrinus NC028317 1          | Leopardus jacobita NC028322 1         | 0,06934626 |
| Zalophus californianus NC008416 1      | Arctocepalus gazella BK010918 1       | 0,06939162 |
| Phoca fasciata NC008428 1              | Halichoerus grypus NC001602 2         | 0,06944096 |
| Ommatophoca rossii AY377287etc 1       | Leptonychotes weddellii NC008424 1    | 0,06944294 |
| Eumetopias jubatus NC004030 10         | Arctocepalus pusillus NC008417 1      | 0,06947235 |
| Vulpes vulpes NC008434 5               | Vulpes corsac NC023958 1              | 0,06948091 |
| Zalophus wollebaeki SRR4431565 1       | Arctocepalus forsteri KT693377 17     | 0,06952045 |
| Genetta genetta T297 1                 | Genetta abyssinica MG489822 1         | 0,06954803 |
| Zalophus californianus NC008416 1      | Arctocepalus forsteri KT693377 17     | 0,06959324 |
| Zalophus californianus NC008416 1      | Arctocepalus pusillus NC008417 1      | 0,0697974  |
| Leopardus tigrinus NC028317 1          | Leopardus colocolo NC028314 1         | 0,06989313 |
| Leopardus geoffroyi NC028320 1         | Leopardus colocolo NC028314 1         | 0,07002763 |
| Zalophus californianus NC008416 1      | Arctocepalus forsteri NC004023 28     | 0,07007688 |
| Pusa hispida NC 008433 1               | Phoca groenlandica NC008429 54        | 0,0700992  |
| Zalophus wollebaeki SRR4431565 1       | Arctocepalus pusillus NC008417 1      | 0,07012865 |
| Zalophus wollebaeki SRR4431565 1       | Arctocepalus forsteri NC004023 28     | 0,07013857 |
| Pusa sibirica NC008432 2               | Phoca groenlandica NC008429 54        | 0,07016126 |
| Panthera onca KP202269 1               | Panthera leo NERO 19                  | 0,07031175 |
| Eumetopias jubatus NC004030 10         | Arctocepalus forsteri KT693377 17     | 0,07041398 |
| Vulpes vulpes NC008434 5               | Vulpes ferrilata NC027935 1           | 0,07042348 |
| Phocarcos hookeri NC008418 1           | Otaria byronia OTAB 1                 | 0,0704608  |
| Eumetopias jubatus NC004030 10         | Arctocepalus australis MG023139 1     | 0,07048127 |
| Pusa caspica NC008431 1                | Phoca groenlandica NC008429 54        | 0,07049789 |
| Panthera uncia NC010638 1              | Panthera onca NC022842 1              | 0,07050087 |
| Eumetopias jubatus NC004030 10         | Arctocepalus gazella BK010918 1       | 0,07061574 |
| Phoca groenlandica NC008429 54         | Halichoerus grypus NC001602 2         | 0,07105744 |
| Panthera uncia NC010638 1              | Panthera leo spelaea KX258452 2       | 0,07106335 |
| Urva javanica/auripunctata NC006835 1  | Urva brachyura KY117547 1             | 0,07119344 |
| Canis mesomelas KT448280 1             | Canis latrans NC008093 7              | 0,07119527 |
| Panthera uncia KP202269 1              | Panthera onca KP202264 2              | 0,07130353 |
| Phoca largha NC008430 1                | Phoca fasciata NC008428 1             | 0,07158    |
| Panthera onca KP202264 2               | Panthera leo spelaea KX258452 2       | 0,07167238 |
| Urva javanica T413 1                   | Urva brachyura KY117547 1             | 0,07184218 |
| Phoca largha NC008430 1                | Phoca groenlandica NC008429 54        | 0,07198381 |
| Phoca vitulina NC001325 1              | Phoca groenlandica NC008429 54        | 0,07205139 |
| Otaria byronia OTAB 1                  | Neophoca cinerea NC008419 1           | 0,07207606 |
| Ursus thibetanus thibetanus NC01118 4  | Ursus americanus JX196366 3           | 0,0722634  |
| Panthera uncia NC010638 1              | Panthera pardus japonensis KJ866876 8 | 0,07231349 |
| Ursus thibetanus mupinensis NC008753 2 | Ursus americanus JX196366 3           | 0,07233164 |
| Phoca vitulina NC001325 1              | Phoca fasciata NC008428 1             | 0,07238831 |
| Panthera uncia NC010638 1              | Panthera pardus NC010641 5            | 0,07239576 |
| Ursus thibetanus formosanus NC009331 1 | Ursus americanus JX196366 3           | 0,0724013  |
| Zalophus californianus NC008416 1      | Arctocepalus townsendi NC008420 1     | 0,07242002 |
| Eumetopias jubatus NC004030 10         | Arctocepalus forsteri NC004023 28     | 0,07265987 |
| Zalophus californianus NC008416 1      | Phocarcos hookeri NC008418 1          | 0,07289109 |
| Ommatophoca rossii AY377287etc 1       | Lobodon carcinophaga NC008423 1       | 0,07298877 |
| Zalophus wollebaeki SRR4431565 1       | Arctocepalus townsendi NC008420 1     | 0,07302011 |
| Zalophus californianus NC008416 1      | Neophoca cinerea NC008419 1           | 0,07309761 |
| Zalophus wollebaeki SRR4431565 1       | Neophoca cinerea NC008419 1           | 0,07329376 |
| Cynictis penicillata T375 1            | Bdeogale nigripes GLC15 1             | 0,07339079 |
| Panthera pardus NC010641 5             | Panthera onca KP202264 2              | 0,07340538 |
| Ursus thibetanus laniger MH281753 2    | Ursus americanus JX196366 3           | 0,07341386 |

|                                        |                                       |            |
|----------------------------------------|---------------------------------------|------------|
| Ursus thibetanus mupinensis NC008753 2 | Arctocepalus forsteri KT693377 17     | 0,18187225 |
| Mustela nigripes NC024942 1            | Caracal caracal NC028306 1            | 0,18187346 |
| Mustela itatis NC034330 19             | Caracal caracal NC028306 1            | 0,18187349 |
| Melogale moschata KP726273 1           | Felis silvestris Lybica KP202275 4    | 0,18187359 |
| Genetta servalina NC024568 2           | Canis latrans NC008093 7              | 0,1818736  |
| Viverra tangalunga MH464792 1          | Genetta genetta T297 1                | 0,18187498 |
| Ursus arctos EU497665 29               | Mustela sibirica AP017394 11          | 0,18187599 |
| Ursus arctos EU497665 29               | Mustela sibirica NC020637 6           | 0,18187599 |
| Nyctereutes procyonoides NC013700 3    | Lynx rufus NC014456 3                 | 0,18187608 |
| Nyctereutes procyonoides NC013700 3    | Leopardus pardalis NC028315 1         | 0,18187666 |
| Poecilogale albinucha T602 1           | Paradoxurus jerdoni MH464793 1        | 0,18187699 |
| Vulpes ferrilata NC027935 1            | Monachus schauinslandi NC008421 1     | 0,18187715 |
| Prionailurus bengalensis NC028301 12   | Canis anthus NC027956 2               | 0,18187726 |
| Prionailurus planiceps NC028312 6      | Mustela altaica NC021751 1            | 0,18188047 |
| Martes pennanti NC020664 16            | Leopardus jacobita NC028322 1         | 0,18188135 |
| Lynx canadensis NC028313 1             | Arctodus simus NC011116 1             | 0,18188262 |
| Leopardus tigrinus NC028317 1          | Bassariscus sumichrasti SRX1099089 7  | 0,18188287 |
| Felis catus NC001700 2                 | Arctodus simus NC011116 1             | 0,18188328 |
| Civettictis civetta GLC19 1            | Canis aureus KT448274 1               | 0,18188348 |
| Pardofelis marmorata NLN3 2            | Martes foina NC020643 1               | 0,1818869  |
| Genetta servalina NC024568 2           | Canis aureus KT448274 1               | 0,18188974 |
| Viverra zibetha T609 1                 | Ursus spelaeus EU327344 13            | 0,18189429 |
| Canis aureus KT448274 1                | Acinonyx jubatus NC005212 3           | 0,18189622 |
| Felis chaus NC028307 1                 | Chrysocyon brachyurus NC024172 1      | 0,1818981  |
| Suricata suricatta SSM10 1             | Monachus monachus NC004492 5          | 0,18190111 |
| Martes flavigula NC012141 3            | Attilax paludinosus T606 1            | 0,18190391 |
| Martes putorius NC020638 4             | Civettictis civetta NC033378 1        | 0,18191174 |
| Ursus arctos GU573491 207              | Homotherium latidens MF871702 3       | 0,18191196 |
| Neovison vison NC020641 3              | Urva javanica/auripunctata NC006835 1 | 0,18191251 |
| Martes flavigula NC012141 3            | Galidictis fasciata DM333 1           | 0,1819129  |
| Phoca groenlandica NC008429 54         | Neofelis nebulosa NC008450 3          | 0,18191546 |
| Martes flavigula NC012141 3            | Leopardus pardalis NC028315 1         | 0,18191738 |
| Erigonothus barbatus NC008426 1        | Tapirus terrestris T358               | 0,18191811 |
| Nasua nasua NC020647 1                 | Arctonyx collaris NC020645 1          | 0,18191884 |
| Viverra tangalunga MH464792 1          | Nasua nasua NC020647 1                | 0,18192171 |
| Zalophus californianus NC008416 1      | Acinonyx jubatus NC005212 3           | 0,18192266 |
| Panthera leo spelaea KX258452 2        | Canis adustus KT448271 1              | 0,18192296 |
| Crossarchus platycephalus C7R66 1      | Arctonyx collaris NC020645 1          | 0,18192354 |
| Martes americana NC020642 1            | Crossarchus platycephalus C7R66 1     | 0,18192491 |
| Mustela putorius NC020638 4            | Arctocepalus townsendi NC008420 1     | 0,18192492 |
| Martes zibellina NC011579 39           | Fossa fossana D350 1                  | 0,18192545 |
| Nandinia binotata NC024567 1           | Bassaricyon neblina SRX1097850 1      | 0,18192786 |
| Melogale moschata V0735A 1             | Hemigalus derbyanus MH464791 1        | 0,18192834 |
| Martes flavigula NC012141 3            | Acinonyx jubatus NC005212 3           | 0,18192954 |
| Arctocepalus townsendi NC008420 1      | Aonyx cinerea NC035814 2              | 0,18193185 |
| Genetta servalina NC024568 2           | Callorhinus ursinus NC008415 1        | 0,18193395 |
| Prionailurus bengalensis NC028301 12   | Lutra lutra NC011358 9                | 0,1819341  |
| Mustela nivalis T306 5                 | Arctocepalus townsendi NC008420 1     | 0,18193491 |
| Mustela altaica NC021751 1             | Arctocepalus townsendi NC008420 1     | 0,18193571 |
| Prionailurus viverrinus NC028305 1     | Ailurus fulgens NC011124 1            | 0,18193634 |
| Vulpes lagopus NC026529 3              | Phoca groenlandica NC008429 54        | 0,18193793 |
| Mustela eversmanni NC028013 1          | Lynx rufus NC014456 3                 | 0,18193883 |
| Panthera onca KP202264 2               | Mustela kathiah NC023210 1            | 0,18193893 |
| Potos flavus T414 1                    | Galerella sanguinea T378 1            | 0,18193911 |
| Ursus arctos EU497665 29               | Melogale moschata KP726273 1          | 0,18193956 |
| Leopardus wiedii NC028318 1            | Callorhinus ursinus NC008415 1        | 0,18193966 |
| Potos flavus T414 1                    | Lynx lynx NC027083 4                  | 0,18194012 |
| Martes foina NC020643 1                | Urva semitorquata MH464789 1          | 0,18194045 |
| Prionailurus viverrinus NC028305 1     | Mustela sibirica NC020637 6           | 0,1819409  |
| Martes americana NC020642 1            | Felis catus NC001700 2                | 0,18194196 |
| Melogale moschata KP726273 1           | Catopuma badia NC028300 1             | 0,18194214 |
| Paradoxurus hermaphroditus NC03959     | Conepatus chinga NC042596 1           | 0,18194225 |
| Viverricula indica KX891751 1          | Arctotherium sp NC030174 1            | 0,18194278 |
| Martes zibellina NC011579 39           | Leopardus pardalis NC028315 1         | 0,18194282 |
| Civettictis civetta GLC19 1            | Arctotherium sp NC030174 1            | 0,18194397 |
| Ursus maritimus NC003428 31            | Ailurus fulgens styani NC009691 1     | 0,18194413 |
| Procyon lotor AB462049 4               | Felis silvestris Lybica KP202275 4    | 0,18194616 |
| Catopuma temminckii NC027115 41        | Canis latrans NC008093 7              | 0,18194826 |
| Mustela nigripes NC024942 1            | Chrysocyon brachyurus NC024172 1      | 0,18195003 |
| Odocoileus megalotis SAF12             | Leopardus pardalis NC028315 1         | 0,1819503  |
| Eumetopias jubatus NC004030 10         | Canis adustus KT448271 1              | 0,18195373 |
| Viverra zibetha T609 1                 | Ictonyx striatus T299 1               | 0,18195446 |
| Ursus thibetanus mupinensis NC008753 2 | Puma yagouaroundi NC028311 1          | 0,18195643 |
| Ictonyx striatus T299 1                | Caracal caracal NC028306 1            | 0,18195663 |
| Leopardus guigna NC028321 1            | Ictonyx striatus T299 1               | 0,18195739 |
| Ursus arctos AP012576 6                | Mustela sibirica NC020637 6           | 0,18195805 |
| Viverra zibetha T609 1                 | Chrysocyon brachyurus NC024172 1      | 0,1819589  |
| Ursus thibetanus laniger MH281753 2    | Neophoca cinerea NC008419 1           | 0,18195894 |
| Ursus spelaeus EU327344 13             | Ailurus fulgens NC011124 1            | 0,18195927 |
| Martes martes T302 3                   | Helarctos malayanus NC009968 2        | 0,18195984 |
| Paguma larvata PDD511 2                | Canis aureus KT448274 1               | 0,1819603  |
| Martes zibellina NC011579 39           | Leopardus colocolo NC028314 1         | 0,18196078 |
| Ursus thibetanus thibetanus NC01118 4  | Bassariscus sumichrasti SRX1099089 7  | 0,18196094 |
| Prionailurus viverrinus NC028305 1     | Lycalopex secureae KT448284 1         | 0,18196389 |
| Ursus spelaeus NC011112 8              | Mustela nivalis T306 5                | 0,18196473 |
| Panthera leo NERO 19                   | Mustela frenata NC020640 1            | 0,18197177 |
| Pusa sibirica NC008432 2               | Neofelis nebulosa NC008450 3          | 0,18197466 |
| Ursus spelaeus EU327344 13             | Arctictis binturong T605 2            | 0,18197684 |
| Phocarcos hookeri NC008418 1           | Lutra lutra NC011358 9                | 0,18198889 |
| Enhydra lutris NC009692 1              | Arctocepalus townsendi NC008420 1     | 0,18198924 |
| Melogale moschata V0735A 1             | Arctocepalus forsteri KT693377 17     | 0,18199356 |
| Ursus arctos GU573491 207              | Eumetopias jubatus NC004030 10        | 0,18199578 |
| Otaria byronia OTAB 1                  | Enhydra lutris NC009692 1             | 0,18199587 |
| Halichoerus grypus NC001602 2          | Diplagalge hoesi MH464790 1           | 0,18199702 |
| Viverricula indica NC025296 2          | Lutra lutra NC011358 9                | 0,18199731 |
| Neophoca cinerea NC008419 1            | Aonyx cinerea NC035814 2              | 0,18199939 |
| Phocarcos hookeri NC008418 1           | Martes pennanti NC020664 16           | 0,18200061 |
| Mustela sibirica NC020637 6            | Canis latrans NC008093 7              | 0,18200082 |
| Mustela altaica NC021751 1             | Canis adustus KT448271 1              | 0,18200095 |
| Neophoca cinerea NC008419 1            | Melogale moschata NC020644 1          | 0,18200108 |
| Meles anakuma NC009677 1               | Leopardus pardalis NC028315 1         | 0,18200189 |
| Meles anakuma NC009677 1               | Lynx canadensis NC028313 1            | 0,18200226 |
| Lutra lutra LC050126 1                 | Felis margarita NC028308 1            | 0,18200257 |

|                                        |                                       |            |
|----------------------------------------|---------------------------------------|------------|
| Mustela nigripes NC024942 1            | Mustela altaica NC021751 1            | 0,07349915 |
| Mustela sibirica NC020637 6            | Mustela altaica NC021751 1            | 0,07349931 |
| Ommatophoca rossii AY377287etc 1       | Hydurga leptonyx NC008425 1           | 0,07365942 |
| Zalophus wollebaeki SRR4431565 1       | Phocarta hookeri NC008418 1           | 0,07376055 |
| Canis mesomelas KT448280 1             | Canis lupus familiaris NC002008 1231  | 0,0738586  |
| Panthera pardus japonensis KJ866876 8  | Panthera onca KP202264 2              | 0,0740641  |
| Ursus thibetanus laniger MH281753 2    | Helarctos malayanus NC009968 2        | 0,07407861 |
| Mustela putorius NC020638 4            | Mustela altaica NC021751 1            | 0,07410488 |
| Eumetopias jubatus NC004030 10         | Arctocephalus townsendi NC008420 1    | 0,07418384 |
| Xenogale naso C07XAR110 1              | Attila paludinosus T606 1             | 0,07426609 |
| Canis mesomelas KT448280 1             | Canis aureus KT448274 1               | 0,07434006 |
| Canis mesomelas KT448280 1             | Canis lupus chanco NC010340 4         | 0,07447606 |
| Zalophus californianus NC008416 1      | Otaria byronia OTAB 1                 | 0,07457604 |
| Mustela sibirica AP017394 11           | Mustela altaica NC021751 1            | 0,07457617 |
| Puma yagouaroundi NC028311 1           | Puma concolor NC016470 22             | 0,07460275 |
| Neophoca cinerea NC008419 1            | Eumetopias jubatus NC004030 10        | 0,07485698 |
| Paradoxurus hermaphroditus NLNC 1      | Paguma larvata PDS511 2               | 0,07494445 |
| Panthera uncia NC010638 1              | Panthera onca KP202264 2              | 0,07500673 |
| Ursus thibetanus formosanus NC009331 1 | Helarctos malayanus NC009968 2        | 0,07501946 |
| Mustela itatsi NC034330 19             | Mustela altaica NC021751 1            | 0,07504738 |
| Zalophus wollebaeki SRR4431565 1       | Otaria byronia OTAB 1                 | 0,07517616 |
| Ursus americanus JX196366 3            | Helarctos malayanus NC009968 2        | 0,07523122 |
| Ursus thibetanus mupinensis NC008753 2 | Helarctos malayanus NC009968 2        | 0,07541428 |
| Ursus thibetanus thibetanus NC011118 4 | Helarctos malayanus NC009968 2        | 0,07562821 |
| Mustela eversmannii NC028013 1         | Mustela altaica NC021751 1            | 0,07585477 |
| Panthera tigris amoyensis NC014770 2   | Panthera onca NC022842 1              | 0,07608826 |
| Canis mesomelas KT448280 1             | Canis anthus NC027956 2               | 0,07642148 |
| Mustela erminea T305 2                 | Mustela altaica NC021751 1            | 0,07659559 |
| Otaria byronia OTAB 1                  | Eumetopias jubatus NC004030 10        | 0,07660986 |
| Phocartos hookeri NC008418 1           | Eumetopias jubatus NC004030 10        | 0,07674295 |
| Mustela nivalis T306 5                 | Mustela nigripes NC024942 1           | 0,07686458 |
| Mustela itatsi NC034330 19             | Mustela erminea T305 2                | 0,07719747 |
| Pusa sibirica NC008432 2               | Cystophora cristata NC008427 1        | 0,07743065 |
| Mustela nivalis T306 5                 | Mustela itatsi NC034330 19            | 0,07753778 |
| Mustela sibirica AP017394 11           | Mustela nivalis T306 5                | 0,07760496 |
| Mustela sibirica NC020637 6            | Mustela nivalis T306 5                | 0,07780697 |
| Paradoxurus jerdoni MH464793 1         | Paguma larvata PDS511 2               | 0,07783987 |
| Paradoxurus hermaphroditus NC039591 1  | Paguma larvata PDS511 2               | 0,07797455 |
| Pusa hispida NC 008433 1               | Cystophora cristata NC008427 1        | 0,07817734 |
| Mustela putorius NC020638 4            | Mustela nivalis T306 5                | 0,07821066 |
| Ursus thibetanus thibetanus NC011118 4 | Ursus spelaeus NC011112 8             | 0,07859395 |
| Ursus thibetanus formosanus NC009331 1 | Ursus spelaeus NC011112 8             | 0,07879325 |
| Ursus thibetanus laniger MH281753 2    | Ursus spelaeus NC011112 8             | 0,07912518 |
| Ursus thibetanus mupinensis NC008753 2 | Ursus maritimus GU573488 Svalbard     | 0,07918775 |
| Ursus thibetanus formosanus NC009331 1 | Ursus maritimus GU573488 Svalbard     | 0,07918979 |
| Pusa caspica NC008431 1                | Cystophora cristata NC008427 1        | 0,07931592 |
| Ursus thibetanus laniger MH281753 2    | Ursus maritimus GU573488 Svalbard     | 0,0793948  |
| Ursus thibetanus thibetanus NC011118 4 | Ursus maritimus GU573488 Svalbard     | 0,07939494 |
| Mustela nivalis T306 5                 | Mustela eversmannii NC028013 1        | 0,07942209 |
| Mustela nigripes NC024942 1            | Mustela erminea T305 2                | 0,0795531  |
| Ichneumia albicauda T603 1             | Bdeogale nigripes GLC15 1             | 0,07965931 |
| Ursus thibetanus laniger MH281753 2    | Ursus arctos AP012576 6               | 0,07966777 |
| Ursus thibetanus laniger MH281753 2    | Ursus arctos GU573491 207             | 0,07973158 |
| Mustela nivalis T306 5                 | Mustela erminea T305 2                | 0,07975921 |
| Ursus thibetanus formosanus NC009331 1 | Ursus arctos GU573491 207             | 0,07979582 |
| Ursus thibetanus formosanus NC009331 1 | Ursus spelaeus EU327344 13            | 0,07980373 |
| Ursus thibetanus thibetanus NC011118 4 | Ursus spelaeus EU327344 13            | 0,07980682 |
| Panthera tigris amoyensis NC014770 2   | Panthera leo NERO 19                  | 0,07981323 |
| Ursus thibetanus thibetanus NC011118 4 | Ursus arctos isabellinus 1885 2       | 0,07986645 |
| Phoca fasciata NC008428 1              | Cystophora cristata NC008427 1        | 0,07992478 |
| Ursus thibetanus mupinensis NC008753 2 | Ursus arctos isabellinus 1885 2       | 0,07992862 |
| Ursus thibetanus formosanus NC009331 1 | Ursus arctos EU497665 29              | 0,07993047 |
| Ursus thibetanus laniger MH281753 2    | Ursus maritimus NC003428 31           | 0,08000083 |
| Ursus thibetanus thibetanus NC011118 4 | Ursus arctos GU573491 207             | 0,08000111 |
| Phoca largha NC008430 1                | Cystophora cristata NC008427 1        | 0,08006235 |
| Ursus thibetanus formosanus NC009331 1 | Ursus maritimus NC003428 31           | 0,08006522 |
| Ursus thibetanus formosanus NC009331 1 | Ursus arctos isabellinus 1885 2       | 0,08006524 |
| Ursus maritimus GU573488 Svalbard      | Helarctos malayanus NC009968 2        | 0,08006654 |
| Ursus thibetanus thibetanus NC011118 4 | Ursus arctos EU497665 29              | 0,08006834 |
| Ursus thibetanus thibetanus NC011118 4 | Ursus arctos AP012576 6               | 0,08007207 |
| Prionailurus rubiginosus NC028304 2    | Felis silvestris lybica KP202275 4    | 0,08012389 |
| Ursus thibetanus mupinensis NC008753 2 | Ursus maritimus NC003428 31           | 0,08013041 |
| Puma concolor NC016470 22              | Acinonyx jubatus NC005212 3           | 0,08013164 |
| Neovison vison NC020641 3              | Mustela frenata NC020640 1            | 0,08016544 |
| Ursus thibetanus mupinensis NC008753 2 | Ursus arctos GU573491 207             | 0,08019779 |
| Ursus thibetanus formosanus NC009331 1 | Ursus arctos AP012576 6               | 0,08020362 |
| Ursus thibetanus mupinensis NC008753 2 | Ursus arctos EU497665 29              | 0,08026513 |
| Ursus thibetanus laniger MH281753 2    | Ursus arctos prunosus MG066703 3      | 0,08027367 |
| Ursus thibetanus thibetanus NC011118 4 | Ursus arctos prunosus MG066703 3      | 0,08027389 |
| Panthera tigris amoyensis NC014770 2   | Panthera pardus NC010641 5            | 0,08028013 |
| Ursus thibetanus mupinensis NC008753 2 | Ursus arctos GU573486 5               | 0,08033596 |
| Ursus thibetanus laniger MH281753 2    | Ursus arctos EU497665 29              | 0,08033747 |
| Ursus thibetanus laniger MH281753 2    | Ursus arctos isabellinus 1885 2       | 0,08033747 |
| Ursus thibetanus formosanus NC009331 1 | Ursus arctos prunosus MG066703 3      | 0,08033803 |
| Phoca vitulina NC001325 1              | Cystophora cristata NC008427 1        | 0,08039923 |
| Ursus thibetanus thibetanus NC011118 4 | Ursus maritimus NC003428 31           | 0,08040501 |
| Ursus thibetanus laniger MH281753 2    | Ursus spelaeus EU327344 13            | 0,08047722 |
| Ursus arctos isabellinus 1885 2        | Helarctos malayanus NC009968 2        | 0,08053817 |
| Halichoerus grypus NC001602 2          | Cystophora cristata NC008427 1        | 0,08055259 |
| Panthera tigris amoyensis NC014770 2   | Panthera pardus japonensis KJ866876 8 | 0,08060087 |
| Ursus thibetanus formosanus NC009331 1 | Ursus arctos GU573486 5               | 0,08060736 |
| Ursus thibetanus thibetanus NC011118 4 | Ursus arctos GU573486 5               | 0,08067784 |
| Mustela sibirica NC020637 6            | Mustela erminea T305 2                | 0,08069727 |
| Ursus thibetanus mupinensis NC008753 2 | Ursus arctos prunosus MG066703 3      | 0,08074021 |
| Ursus thibetanus mupinensis NC008753 2 | Ursus arctos AP012576 6               | 0,08074031 |
| Ichneumia albicauda T603 1             | Cynictis penicillata T375 1           | 0,08087112 |
| Ursus thibetanus laniger MH281753 2    | Ursus arctos GU573486 5               | 0,08094717 |
| Mustela putorius NC020638 4            | Mustela erminea T305 2                | 0,08096648 |
| Mustela sibirica AP017394 11           | Mustela erminea T305 2                | 0,08096648 |
| Prionailurus rubiginosus NC028304 2    | Felis margarita NC028308 1            | 0,0809992  |
| Prionailurus rubiginosus NC028304 2    | Felis catus NC001700 2                | 0,08120119 |
| Ursus thibetanus mupinensis NC008753 2 | Ursus spelaeus NC011112 8             | 0,08135008 |
| Ursus maritimus NC003428 31            | Helarctos malayanus NC009968 2        | 0,08148064 |

|                                        |                                      |            |
|----------------------------------------|--------------------------------------|------------|
| Salanoia concolor D378 1               | Martes martes T302 3                 | 0,18200319 |
| Prionailurus viverrinus NC028305 1     | Meles anakuma NC009677 1             | 0,18200387 |
| Prionailurus viverrinus NC028305 1     | Lutra lutra LC005126 1               | 0,18200393 |
| Mungotictis decemlineata NC027828      | Melogale moschata NC020644 1         | 0,18200481 |
| Vulpes vulpes NC008434 5               | Genetta servalina NC024568 2         | 0,18200545 |
| Paradoxurus jerdoni MH464793 1         | Mustela sibirica NC020637 6          | 0,1820064  |
| Procyon lotor AB462046 3               | Arctotherium sp NC030174 1           | 0,18200728 |
| Ichonyx striatus T299 1                | Fossa fossana D350 1                 | 0,18200774 |
| Mustela putorius NC020638 4            | Leptailurus serval NC028316 1        | 0,18200813 |
| Genetta genetta T297 1                 | Aillurus fulgens styani NC009691 1   | 0,18200879 |
| Vulpes vulpes NC008434 5               | Leopardus wiedii NC028318 1          | 0,18200879 |
| Prionailurus planiceps NC028312 6      | Martes americana NC020642 1          | 0,18200916 |
| Vulpes vulpes NC008434 5               | Caracal caracal NC028306 1           | 0,18200937 |
| Martes zibellina NC011579 39           | Felis catus NC001700 2               | 0,18200967 |
| Mustela eversmannii NC028013 1         | Leopardus geoffroyi NC028320 1       | 0,18200973 |
| Ursus arctos prunosus MG066703 3       | Mustela sibirica NC020637 6          | 0,18201077 |
| Procyon lotor AB462049 4               | Arctodus simus NC011116 1            | 0,18201087 |
| Civettictis civetta GLC19 1            | Arctocephalus pusillus NC008417 1    | 0,18201172 |
| Smilodon populator MF871700 1          | Procyon lotor AB462046 3             | 0,18201184 |
| Ursus arctos GU573486 5                | Martes zibellina NC011579 39         | 0,18201274 |
| Nyctereutes procyonoides NC013700 3    | Leopardus geoffroyi NC028320 1       | 0,18201359 |
| Ursus lotor AB462046 3                 | Leopardus pardalis NC028315 1        | 0,18201458 |
| Ursus thibetanus laniger MH281753 2    | Martes melampus NC009678 1           | 0,18201478 |
| Ursus thibetanus formosanus NC009331 1 | Callorhinus ursinus NC008415 1       | 0,18201482 |
| Phoca vitulina NC001325 1              | Paradoxurus jerdoni MH464793 1       | 0,18201516 |
| Martes foina NC020643 1                | Galerella sanguinea T378 1           | 0,18201599 |
| Hemigalus derbyanus MH464791 1         | Enhydra lutris NC009692 1            | 0,18201673 |
| Zalophus wollebaeki SRR4431565 1       | Procyon lotor AB462046 3             | 0,18201675 |
| Martes zibellina NC011579 39           | Helarctos malayanus NC009968 2       | 0,18201695 |
| Martes martes T302 3                   | Felis nigripes NC028309 1            | 0,18201761 |
| Melursus ursinus NC009970 2            | Arctocephalus australis MG023139 1   | 0,18201885 |
| Helarctos malayanus NC009968 2         | Fossa fossana D350 1                 | 0,1820192  |
| Helarctos malayanus NC009968 2         | Enhydra lutris NC009692 1            | 0,18201931 |
| Catopuma badia NC028300 1              | Arctotherium sp NC030174 1           | 0,18201956 |
| Panthera onca NC022842 1               | Mustela erminea T305 2               | 0,18202043 |
| Ursus thibetanus laniger MH281753 2    | Salanoia concolor D378 1             | 0,18202083 |
| Ursus thibetanus laniger MH281753 2    | Arctocephalus australis MG023139 1   | 0,18202169 |
| Meles leucurus NC009173 4              | Diplogale hosei MH464790 1           | 0,1820219  |
| Paradoxurus hermaphroditus NC039591 1  | Bassariscus sumichrasti SRX1099089 1 | 0,18202649 |
| Zalophus californianus NC008416 1      | Crossarchus platycephalus C7R66 1    | 0,18202718 |
| Mirounga angustirostris SRR10331586    | Crocota crocata NC020670 3           | 0,18202786 |
| Viverricula indica KX891751 1          | Chrysocyon brachyurus NC024172 1     | 0,18202868 |
| Viverricula indica KX891745 1          | Ursus thibetanus laniger MH281753 2  | 0,18202944 |
| Ursus thibetanus laniger MH281753 2    | Smilodon populator MF871700 1        | 0,18202986 |
| Procyon lotor AB462046 3               | Acinonyx jubatus NC005212 3          | 0,18202987 |
| Panthera leo spelaeus KX258452 2       | Mirounga angustirostris SRR10331586  | 0,18203032 |
| Meles meles T303 3                     | Urva javanica/auripunctata NC006835  | 0,18203156 |
| Otocolobus manul NC028323 1            | Chrysocyon brachyurus NC024172 1     | 0,18203431 |
| Mustela itatsi NC034330 19             | Canis lupus chanco NC010340 4        | 0,18203444 |
| Catopuma badia NC028300 1              | Canis mesomelas KT448280 1           | 0,18203892 |
| Mustela altaica NC021751 1             | Canis lupus familiaris NC002008 1231 | 0,18203957 |
| Spilogale putorius NC010497 1          | Martes melampus NC009678 1           | 0,18203995 |
| Smilodon populator MF871700 1          | Nyctereutes procyonoides NC013700 3  | 0,18204094 |
| Ursus spelaeus NC011112 8              | Acinonyx jubatus NC005212 3          | 0,18204923 |
| Paradoxurus hermaphroditus NLNC 1      | Halichoerus grypus NC001602 2        | 0,18205103 |
| Viverra zibetha T609 1                 | Eumetopias jubatus NC004030 10       | 0,18205345 |
| Felis margarita NC028308 1             | Canis lupus chanco NC010340 4        | 0,18205482 |
| Phocartos hookeri NC008418 1           | Lutra lutra LC005126 1               | 0,18205689 |
| Ursus thibetanus thibetanus NC011118 4 | Canis latrans NC008093 7             | 0,18205805 |
| Mustela sibirica NC020637 6            | Arctocephalus townsendi NC008420 1   | 0,18205939 |
| Mustela kathiah NC023210 1             | Arctocephalus gazella BK010918 1     | 0,18205965 |
| Melogale moschata V0735A 1             | Fossa fossana D350 1                 | 0,18205975 |
| Salanoia concolor D378 1               | Lutra sumatrana NC035810 1           | 0,18206249 |
| Nasua nasua NC020647 1                 | Cystophora cristata NC008427 1       | 0,18206348 |
| Conepatus chinga NC042596 1            | Arctodus simus NC011116 1            | 0,18206374 |
| Urocyon littoralis catalinae KP129018  | Pusa caspica NC008431 1              | 0,18206376 |
| Otaria byronia OTAB 1                  | Melogale moschata V0735A 1           | 0,18206546 |
| Otaria byronia OTAB 1                  | Fossa fossana D350 1                 | 0,18206707 |
| Salanoia concolor D378 1               | Arctonyx collaris NC020645 1         | 0,18206693 |
| Talioidea taxus NC020646 1             | Xenogale naso C07XAR110 1            | 0,18206912 |
| Ursus arctos GU573486 5                | Eumetopias jubatus NC004030 10       | 0,18206984 |
| Enhydra lutris NC009692 1              | Catopuma temminckii NC027115 41      | 0,18206994 |
| Pusa sibirica NC008432 2               | Paradoxurus jerdoni MH464793 1       | 0,18207155 |
| Prionodon linsang ERR2391707 1         | Phoca fasciata NC008428 1            | 0,18207236 |
| Neovison vison NC020641 3              | Urva brachyura KY117547 1            | 0,1820735  |
| Martes melampus NC009678 1             | Canis aureus KT448274 1              | 0,18207416 |
| Prionailurus planiceps KY682741 4      | Lutra sumatrana NC035810 1           | 0,18207425 |
| Lutra sumatrana NC035810 1             | Felis margarita NC028308 1           | 0,18207462 |
| Mustela eversmannii NC028013 1         | Felis margarita NC028308 1           | 0,18207499 |
| Procyon lotor AB462046 3               | Otaria byronia OTAB 1                | 0,18207647 |
| Mustela sibirica AP017394 11           | Catopuma badia NC028300 1            | 0,18207663 |
| Martes zibellina NC011579 39           | Felis nigripes NC028309 1            | 0,18207708 |
| Martes zibellina NC011579 39           | Felis chaus NC028307 1               | 0,18207763 |
| Paradoxurus hermaphroditus NC039591 1  | Canis latrans NC008093 7             | 0,18207787 |
| Ursus arctos prunosus MG066703 3       | Mustela sibirica AP017394 11         | 0,18207809 |
| Felis margarita NC028308 1             | Canis latrans NC008093 7             | 0,18207884 |
| Catopuma badia NC028300 1              | Aillurus fulgens styani NC009691 1   | 0,18207905 |
| Puma yagouaroundi NC028311 1           | Canis anthus NC027956 2              | 0,18207949 |
| Zalophus californianus NC008416 1      | Genetta abyssinica MG489822 1        | 0,18207955 |
| Parahaena brunnea NC038159 15          | Mustela erminea T305 2               | 0,18207999 |
| Ursus arctos isabellinus 1885 2        | Arctocephalus pusillus NC008417 1    | 0,18208043 |
| Crossarchus platycephalus C7R66 1      | Canis lupus chanco NC010340 4        | 0,1820817  |
| Mustela altaica NC021751 1             | Caracal caracal NC028306 1           | 0,18208265 |
| Melogale moschata NC020644 1           | Leopardus tigrinus NC028317 1        | 0,18208283 |
| Prionailurus rubiginosus NC028304 2    | Anonyx cinerea NC035814 2            | 0,18208371 |
| Ursus thibetanus formosanus NC009331 1 | Arctocephalus forsteri KT693377 17   | 0,18208484 |
| Lutra lutra LC050126 1                 | Acinonyx jubatus NC005212 3          | 0,1820851  |
| Ursus arctos GU573486 5                | Aillurus fulgens styani NC009691 1   | 0,18208525 |
| Arctocephalus forsteri NC004023 28     | Aillurus fulgens NC011124 1          | 0,18208537 |
| Melursus ursinus NC009970 2            | Arctocephalus townsendi NC008420 1   | 0,18208548 |
| Catopuma temminckii NC027115 41        | Bassariscus sumichrasti SRX1099089 1 | 0,18208864 |
| Prionailurus planiceps KY682741 4      | Lycan pictus NC028427 1              | 0,18209097 |
| Prionailurus planiceps NC028312 6      | Lycalopex secureus KT448284 1        | 0,18209331 |

|                                        |                                       |           |
|----------------------------------------|---------------------------------------|-----------|
| Ursus arctos GU573486 5                | Helarctos malayanus NCO09968 2        | 0,8148395 |
| Ursus spelaeus NCO11112 8              | Ursus americanus JX196366 3           | 0,8149976 |
| Mustela eversmanni NCO28013 1          | Mustela erminea T305 2                | 0,8152722 |
| Ursus thibetanus thibetanus NCO11118 4 | Melurus ursinus NCO09970 2            | 0,8161756 |
| Ursus spelaeus NCO11112 8              | Helarctos malayanus NCO09968 2        | 0,8162262 |
| Puma yagouaroundi NCO28311 1           | Acinonyx jubatus NCO05212 3           | 0,8181482 |
| Prionailurus bengalensis NCO28301 12   | Felis chaus NCO28307 1                | 0,818745  |
| Prionailurus rubiginosus NCO28304 2    | Felis chaus NCO28307 1                | 0,8194183 |
| Ursus spelaeus EU327344 13             | Helarctos malayanus NCO09968 2        | 0,8195938 |
| Meles leucurus NCO39173 4              | Arctonyx collaris NCO20645 1          | 0,8197052 |
| Ursus arctos GU573491 207              | Helarctos malayanus NCO09968 2        | 0,8201937 |
| Ursus thibetanus mupiensis NCO08753 2  | Ursus spelaeus EU327344 13            | 0,8202407 |
| Puma concolor NCO16470 22              | Lynx rufus NCO14456 3                 | 0,8207649 |
| Prionailurus bengalensis CKM45 20      | Felis silvestris lybica KP202275 4    | 0,8207831 |
| Panthera tigris amoyensis NCO14770 2   | Panthera leo spelaea KX258452 2       | 0,8211901 |
| Panthera uncia KP202269 1              | Panthera tigris amoyensis NCO14770 2  | 0,8214948 |
| Ursus arctos EU497665 29               | Helarctos malayanus NCO09968 2        | 0,8215405 |
| Panthera tigris NCO10642 35            | Panthera onca NCO22842 1              | 0,8221572 |
| Ursus thibetanus formosanus NCO09331 1 | Melurus ursinus NCO09970 2            | 0,8236139 |
| Puma concolor NCO16470 22              | Catopuma badia NCO28300 1             | 0,8248048 |
| Ursus maritimus GU573488 Svalbard      | Melurus ursinus NCO09970 2            | 0,824932  |
| Panthera tigris amoyensis NCO14770 2   | Panthera onca KP202264 2              | 0,8254983 |
| Prionailurus bengalensis NCO28301 12   | Felis silvestris lybica KP202275 4    | 0,8281713 |
| Ursus thibetanus mupiensis NCO08753 2  | Melurus ursinus NCO09970 2            | 0,8289701 |
| Ursus arctos AP012576 6                | Helarctos malayanus NCO09968 2        | 0,8290111 |
| Prionailurus bengalensis CKM45 20      | Felis catus NCO01700 2                | 0,8295362 |
| Ursus arctos GU573491 207              | Melurus ursinus NCO09970 2            | 0,8336858 |
| Ursus thibetanus laniger MH281753 2    | Melurus ursinus NCO09970 2            | 0,8337571 |
| Ursus arctos EU497665 29               | Melurus ursinus NCO09970 2            | 0,8350337 |
| Prionailurus bengalensis NCO28301 12   | Felis nigripes NCO28309 1             | 0,836251  |
| Uon alpinus NCO13445 3                 | Canis latrans NCO08093 7              | 0,8370287 |
| Ursus maritimus NCO03428 31            | Melurus ursinus NCO09970 2            | 0,837053  |
| Prionailurus rubiginosus NCO28304 2    | Otocolobus manul NCO28323 1           | 0,8382709 |
| Phoca groenlandica NCO08429 54         | Cystophora cristata NCO08427 1        | 0,8383015 |
| Ursus maritimus GU573488 Svalbard      | Ursus americanus JX196366 3           | 0,8385008 |
| Ursus spelaeus EU327344 13             | Ursus americanus JX196366 3           | 0,8392493 |
| Ursus arctos GU573486 5                | Melurus ursinus NCO09970 2            | 0,8397768 |
| Prionailurus bengalensis NCO28301 12   | Leptailurus serval NCO28316 1         | 0,8402909 |
| Ursus arctos pruinosus MG066703 3      | Helarctos malayanus NCO09968 2        | 0,8404301 |
| Ursus maritimus NCO03428 31            | Ursus americanus JX196366 3           | 0,8405212 |
| Prionailurus bengalensis CKM45 20      | Felis margarita NCO28308 1            | 0,8409835 |
| Panthera tigris NCO10642 35            | Panthera leo NERO 19                  | 0,8419137 |
| Meles meles T303 3                     | Arctonyx collaris NCO20645 1          | 0,841914  |
| Prionailurus bengalensis CKM45 20      | Felis chaus NCO28307 1                | 0,8450242 |
| Ursus arctos EU497665 29               | Ursus americanus JX196366 3           | 0,8472568 |
| Lynx canadensis NCO28313 1             | Catopuma badia NCO28300 1             | 0,8476973 |
| Prionailurus bengalensis NCO28301 12   | Felis catus NCO01700 2                | 0,8476973 |
| Puma yagouaroundi NCO28311 1           | Catopuma badia NCO28300 1             | 0,8476973 |
| Ursus arctos AP012576 6                | Melurus ursinus NCO09970 2            | 0,8478619 |
| Mirounga leonina NCO08422 1            | Leptonyx chotes weddellii NCO08424 1  | 0,8483706 |
| Uon alpinus NCO13445 3                 | Canis lupus familiaris NCO02008 1231  | 0,848634  |
| Ursus arctos GU573486 5                | Ursus americanus JX196366 3           | 0,8486746 |
| Canis latrans NCO08093 7               | Canis adustus KT448271 1              | 0,8491793 |
| Helogale parvula SRR7637809 1          | Crossarchus platycephalus C7R66 1     | 0,8499172 |
| Prionailurus bengalensis NCO28301 12   | Felis margarita NCO28308 1            | 0,8499172 |
| Vulpes vulpes NCO08434 5               | Vulpes lagopus NCO26529 3             | 0,8510065 |
| Ursus arctos pruinosus MG066703 3      | Melurus ursinus NCO09970 2            | 0,8519012 |
| Meles anakuma NCO09967 1               | Arctonyx collaris NCO20645 1          | 0,8520089 |
| Profelis aurata NCO28299 1             | Leptailurus serval NCO28316 1         | 0,8530837 |
| Ursus spelaeus EU327344 13             | Melurus ursinus NCO09970 2            | 0,8539883 |
| Ursus arctos GU573491 207              | Ursus americanus JX196366 3           | 0,8539898 |
| Lynx pardinus NCO28319 161             | Catopuma temminckii NCO27115 41       | 0,8544303 |
| Panthera uncia NCO10638 1              | Panthera tigris amoyensis NCO14770 2  | 0,8544889 |
| Ursus arctos isabellinus 1885 2        | Ursus americanus JX196366 3           | 0,8546618 |
| Prionailurus bengalensis NCO28301 12   | Otocolobus manul NCO28323 1           | 0,8551037 |
| Ursus spelaeus NCO11112 8              | Melurus ursinus NCO09970 2            | 0,8553299 |
| Lynx rufus NCO14456 3                  | Catopuma badia NCO28300 1             | 0,855777  |
| Ursus arctos AP012576 6                | Ursus americanus JX196366 3           | 0,8560498 |
| Leptailurus serval NCO28316 1          | Caracal caracal NCO28306 1            | 0,8564503 |
| Prionailurus bengalensis NCO28312 6    | Felis silvestris lybica KP202275 4    | 0,8564503 |
| Prionailurus bengalensis CKM45 20      | Leptailurus serval NCO28316 1         | 0,8564715 |
| Uon alpinus NCO13445 3                 | Canis aureus KT448274 1               | 0,8571012 |
| Lynx lynx NCO27083 4                   | Catopuma badia NCO28300 1             | 0,8571236 |
| Prionailurus rubiginosus NCO28304 2    | Felis nigripes NCO28309 1             | 0,8571236 |
| Mirounga leonina NCO08422 1            | Hydrurga leptonyx NCO08425 1          | 0,8571655 |
| Canis aureus KT448274 1                | Canis adustus KT448271 1              | 0,8572612 |
| Uon alpinus NCO13445 3                 | Canis lupus chanco NCO10340 4         | 0,8575172 |
| Lynx lynx NCO27083 4                   | Catopuma temminckii NCO27115 41       | 0,8577969 |
| Otocolobus manul NCO28323 1            | Felis silvestris lybica KP202275 4    | 0,8577969 |
| Panthera tigris NCO10642 35            | Panthera pardus NCO10641 5            | 0,8580723 |
| Salanoia concolor D378 1               | Galidia elegans D146 1                | 0,8584125 |
| Prionailurus bengalensis CKM45 20      | Felis nigripes NCO28309 1             | 0,8584891 |
| Prionailurus planiceps KY682741 4      | Felis silvestris lybica KP202275 4    | 0,8591436 |
| Prionailurus bengalensis CKM45 20      | Lynx canadensis NCO28313 1            | 0,8598362 |
| Ursus arctos isabellinus 1885 2        | Melurus ursinus NCO09970 2            | 0,8599506 |
| Prionailurus bengalensis NCO28301 12   | Lynx canadensis NCO28313 1            | 0,8604902 |
| Puma concolor NCO16470 22              | Lynx lynx NCO27083 4                  | 0,8625101 |
| Puma concolor NCO16470 22              | Lynx pardinus NCO28319 161            | 0,8625101 |
| Puma yagouaroundi NCO28311 1           | Lynx canadensis NCO28313 1            | 0,8625101 |
| Ursus arctos pruinosus MG066703 3      | Ursus americanus JX196366 3           | 0,8627883 |
| Lynx rufus NCO14456 3                  | Catopuma temminckii NCO27115 41       | 0,8631834 |
| Prionailurus rubiginosus NCO28304 2    | Leptailurus serval NCO28316 1         | 0,8631834 |
| Lynx pardinus NCO28319 161             | Catopuma badia NCO28300 1             | 0,8638567 |
| Panthera tigris NCO10642 35            | Panthera leo spelaea KX258452 2       | 0,8642738 |
| Puma concolor NCO16470 22              | Lynx canadensis NCO28313 1            | 0,8652034 |
| Puma yagouaroundi NCO28311 1           | Lynx rufus NCO14456 3                 | 0,8672233 |
| Prionailurus planiceps NCO28312 6      | Felis margarita NCO28308 1            | 0,8678966 |
| Panthera tigris NCO10642 35            | Panthera pardus japonensis KJ866876 8 | 0,8679568 |
| Melurus ursinus NCO09970 2             | Helarctos malayanus NCO09968 2        | 0,8680644 |
| Puma concolor NCO16470 22              | Prionailurus rubiginosus NCO28304 2   | 0,8685699 |
| Galidictis fasciata DM333 1            | Galidia elegans D146 1                | 0,8691847 |
| Prionailurus planiceps KY682741 4      | Felis chaus NCO28307 1                | 0,8692432 |
| Catopuma badia NCO28300 1              | Acinonyx jubatus NCO05212 3           | 0,8693273 |

|                                        |                                      |            |
|----------------------------------------|--------------------------------------|------------|
| Gulo gulo NCO09685 3                   | Arctocepalus townsendi NCO08420 1    | 0,18209347 |
| Ursus spelaeus EU327344 13             | Martes martes T302 3                 | 0,1820938  |
| Ursus spelaeus NCO11112 8              | Martes martes T302 3                 | 0,18209404 |
| Paguma larvata PDD511 2                | Chrysoyon brachyurus NCO24172 1      | 0,18209536 |
| Ursus arctos EU497665 29               | Neovison vison NCO20641 3            | 0,1820969  |
| Ursus thibetanus formosanus NCO09331 1 | Leopardus wiedii NCO28318 1          | 0,18209861 |
| Ursus thibetanus formosanus NCO09331 1 | Puma yagouaroundi NCO28311 1         | 0,18209995 |
| Monachus monachus NCO44972 5           | Xenogale naso C07XAR110 1            | 0,18210042 |
| Paradoxurus hermaphroditus NLCN 1      | Mephitis mephitis NCO20648 1         | 0,18210228 |
| Ursus spelaeus NCO11112 8              | Otaria byronia OTAB 1                | 0,18210228 |
| Meles anakuma NCO09677 1               | Civettictis civetta NCO33378 1       | 0,18210854 |
| Viverra zibetha T609 1                 | Martes flavigula NCO12141 3          | 0,1821087  |
| Leopardus pardalis T262 1              | Canis lupus familiaris NCO02008 1231 | 0,18210883 |
| Felis nigripes NCO28309 1              | Canis lupus familiaris NCO02008 1231 | 0,1821108  |
| Felis catus NCO01700 2                 | Canis lupus familiaris NCO02008 1231 | 0,18211085 |
| Lynx rufus NCO14456 3                  | Gulo gulo NCO09685 3                 | 0,18211603 |
| Prionailurus bengalensis CKM45 20      | Canis lupus familiaris NCO02008 1231 | 0,18211921 |
| Martes flavigula NCO12141 3            | Felis silvestris lybica KP202275 4   | 0,18211944 |
| Panthera leo spelaea KX258452 2        | Monachus monachus NCO44972 5         | 0,18212049 |
| Meles leucurus NCO39173 4              | Arctocepalus gazella BK010918 1      | 0,18212424 |
| Taxidea taxus NCO20646 1               | Diplogale hosei MH464790 1           | 0,18212996 |
| Salanoia concolor D378 1               | Martes americana NCO20642 1          | 0,18213043 |
| Urocyon cinereargenteus NCO26723 2     | Pusa caspica NCO08431 1              | 0,1821311  |
| Otaria byronia OTAB 1                  | Martes americana NCO20642 1          | 0,1821312  |
| Urocyon cinereargenteus NCO26723 2     | Cystophora cristata NCO08427 1       | 0,18213147 |
| Urocyon littoralis catalinae KP129018  | Cystophora cristata NCO08427 1       | 0,18213147 |
| Tremarctos ornatus NCO09969 2          | Arctonyx collaris NCO20645 1         | 0,18213323 |
| Melogale moschata NCO20644 1           | Arctocepalus forsteri K7693377 17    | 0,18213478 |
| Enhydra lutris NCO09692 1              | Caracal caracal NCO28306 1           | 0,1821366  |
| Mustela kathiah NCO23210 1             | Canis anthus NCO27956 2              | 0,18213665 |
| Felis nigripes NCO28309 1              | Enhydra lutris NCO09692 1            | 0,18213749 |
| Mustela frenata NCO20640 1             | Galidictis fasciata DM333 1          | 0,18213809 |
| Panthera uncia KP202269 1              | Mirounga leonina NCO08422 1          | 0,18213867 |
| Meles leucurus NCO39173 4              | Felis chaus NCO28307 1               | 0,18213883 |
| Lutra lutra NCO11358 9                 | Hemigalus derbyanus MH464791 1       | 0,18213899 |
| Caracal caracal NCO28306 1             | Arctonyx collaris NCO20645 1         | 0,18213917 |
| Prionailurus rubiginosus NCO28304 2    | Callorhinus ursinus NCO08415 1       | 0,18213959 |
| Panthera pardus japonensis KJ866876    | Mustela frenata NCO20640 1           | 0,18214074 |
| Viverra tangalunga MH464792 1          | Paradoxurus jerdoni MH464793 1       | 0,18214135 |
| Prionailurus planiceps NCO28312 6      | Lutra sumatrana NCO35810 1           | 0,18214139 |
| Mustela putorius NCO20638 4            | Civettictis civetta GLC19 1          | 0,18214159 |
| Prionailurus planiceps NCO28312 6      | Mustela itatis NCO34330 19           | 0,1821418  |
| Mustela putorius NCO20638 4            | Arctotherium sp NCO30174 1           | 0,18214232 |
| Prionailurus bengalensis CKM45 20      | Arctonyx collaris NCO20645 1         | 0,18214235 |
| Mustela itatis NCO34330 19             | Felis margarita NCO28308 1           | 0,18214242 |
| Viverra tangalunga MH464792 1          | Felis chaus NCO28307 1               | 0,18214284 |
| Martes americana NCO20642 1            | Felis margarita NCO28308 1           | 0,18214418 |
| Mustela altaica NCO21751 1             | Genetta abyssinica MG489822 1        | 0,18214498 |
| Ursus arctos GU573486 5                | Callorhinus ursinus NCO08415 1       | 0,18214515 |
| Vulpes lagopus NCO26529 3              | Mirounga angustirostris SRR10331586  | 0,18214618 |
| Prionodon linsang ERR2391707 1         | Canis aureus KT448274 1              | 0,18214631 |
| Ursus arctos GU573491 207              | Ailurus fulgens styani NCO09691 1    | 0,18214637 |
| Ursus arctos GU573486 5                | Melogale moschata KP726273 1         | 0,18214755 |
| Puma yagouaroundi NCO28311 1           | Procyon lotor AB462046 3             | 0,18215056 |
| Martes pennanti NCO20664 16            | Leopardus wiedii NCO28318 1          | 0,18215083 |
| Martes martes T302 3                   | Catopuma badia NCO28300 1            | 0,18215102 |
| Ursus thibetanus formosanus NCO09331 1 | Enhydra lutris NCO09692 1            | 0,18215208 |
| Prionailurus viverrinus NCO28305 1     | Mustela nivalis T306 5               | 0,18215272 |
| Procyon lotor AB462046 3               | Catopuma badia NCO28300 1            | 0,18215308 |
| Ursus thibetanus thibetanus NCO11118 4 | Arctocepalus australis MG023139 1    | 0,18215378 |
| Martes foina NCO20643 1                | Lynx rufus NCO14456 3                | 0,18215595 |
| Lutra sumatrana NCO35810 1             | Helarctos malayanus NCO09968 2       | 0,18215683 |
| Canis latrans NCO08093 7               | Arctictis binturong T605 2           | 0,18215771 |
| Ictonyx striatus T299 1                | Felis chaus NCO28307 1               | 0,18215929 |
| Ursus spelaeus EU327344 13             | Ailurus fulgens styani NCO09691 1    | 0,18216135 |
| Otaria byronia OTAB 1                  | Gulo gulo NCO09685 3                 | 0,1821617  |
| Ursus thibetanus laniger MH281753 2    | Civettictis civetta GLC19 1          | 0,18216358 |
| Ursus arctos GU573491 207              | Neovison vison NCO20641 3            | 0,18216366 |
| Ursus maritimus NCO03428 31            | Neovison vison NCO20641 3            | 0,18216385 |
| Prionailurus bengalensis CKM45 20      | Lycaon pictus NCO28427 2             | 0,18216395 |
| Ursus thibetanus laniger MH281753 2    | Otaria byronia OTAB 1                | 0,18216701 |
| Phoca vitulina NCO01325 1              | Diplogale hosei MH464790 1           | 0,18217054 |
| Meles meles T303 3                     | Canis lupus chanco NCO10340 4        | 0,18217131 |
| Zalophus californianus NCO08416 1      | Leopardus tigrinus NCO28317 1        | 0,18217544 |
| Pusa caspica NCO08431 1                | Neofelis nebulosa NCO08450 3         | 0,18217653 |
| Otaria byronia OTAB 1                  | Homotherium latidens MF871702 3      | 0,1821782  |
| Ursus arctos AP012576 6                | Neovison vison NCO20641 3            | 0,18217838 |
| Civettictis civetta NCO33378 1         | Ailurus fulgens styani NCO09691 1    | 0,18218194 |
| Prionailurus planiceps NCO28312 6      | Gulo gulo NCO09685 3                 | 0,18218286 |
| Lynx canadensis NCO28313 1             | Gulo gulo NCO09685 3                 | 0,18218324 |
| Nasua nasua NCO20647 1                 | Halichoerus grypus NCO01602 2        | 0,18218367 |
| Ursus americanus JX196366 3            | Ailurus fulgens styani NCO09691 1    | 0,18218578 |
| Martes flavigula NCO12141 3            | Leopardus jacobita NCO28322 1        | 0,18218587 |
| Martes melampus NCO09678 1             | Genetta abyssinica MG489822 1        | 0,18218713 |
| Zalophus californianus NCO08416 1      | Smilodon populator MF871700 1        | 0,18218988 |
| Mustela eversmanni NCO28013 1          | Fossa fossana D350 1                 | 0,18219489 |
| Mustela erminea T305 2                 | Mungos mungo/gambianus SRR77048      | 0,18219762 |
| Mustela frenata NCO20640 1             | Xenogale naso C07XAR110 1            | 0,18219814 |
| Pusa sibirica NCO08432 2               | Nasua nasua NCO20647 1               | 0,18219846 |
| Taxidea taxus NCO20646 1               | Urva brachyura KY117547 1            | 0,18219985 |
| Paradoxurus hermaphroditus NLCN 1      | Canis mesomelas KT448280 1           | 0,18220127 |
| Melogale moschata NCO20644 1           | Arctocepalus townsendi NCO08420 1    | 0,18220147 |
| Nyctereles procyonoides NCO13700 3     | Mustela frenata NCO20640 1           | 0,18220247 |
| Genetta abyssinica MG489822 1          | Callorhinus ursinus NCO08415 1       | 0,18220283 |
| Prionailurus planiceps KY682741 4      | Lutra lutra NCO11358 9               | 0,18220429 |
| Felis catus NCO01700 2                 | Ailurus fulgens styani NCO09691 1    | 0,18220596 |
| Melogale moschata V0735A 1             | Civettictis civetta GLC19 1          | 0,18220623 |
| Prionailurus viverrinus NCO28305 1     | Arctonyx collaris NCO20645 1         | 0,18220627 |
| Mustela kathiah NCO23210 1             | Lynx rufus NCO14456 3                | 0,18220703 |
| Felis chaus NCO28307 1                 | Ailurus fulgens styani NCO09691 1    | 0,18220751 |
| Pardofelis marmorata NLN3 2            | Martes melampus NCO09678 1           | 0,18220808 |
| Paradoxurus hermaphroditus NLCN 1      | Mustela eversmanni NCO28013 1        | 0,18220809 |
| Pardofelis marmorata NLN3 2            | Mustela putorius NCO20638 4          | 0,18220884 |

|                                       |                                          |            |
|---------------------------------------|------------------------------------------|------------|
| Puma concolor NC016470 22             | Prionailurus bengalensis NC028301 12     | 0,08705898 |
| Puma yagouaroundi NC028311 1          | Lynx pardinus NC028319 161               | 0,08712631 |
| Prionailurus viverrinus NC028305 1    | Felis silvestris lybica KP202275 4       | 0,08712815 |
| Lynx canadensis NC028313 1            | Catopuma temminckii NC027115 41          | 0,08719365 |
| Prionailurus planiceps KY682741 4     | Felis margarita NC028308 1               | 0,08719365 |
| Puma yagouaroundi NC028311 1          | Lynx lynx NC027083 4                     | 0,08719365 |
| Prionailurus planiceps NC028312 6     | Felis chaus NC028307 1                   | 0,08726098 |
| Ursus americanus JX196366 3           | Melursus ursinus NC009970 2              | 0,0872846  |
| Otocolobus manul NC028323 1           | Felis chaus NC028307 1                   | 0,08732831 |
| Cuon alpinus NC013445 3               | Canis anthus NC027956 2                  | 0,08733851 |
| Otocolobus manul NC028323 1           | Felis catus NC001700 2                   | 0,08739564 |
| Prionailurus bengalensis CKM45 20     | Lynx rufus NC014456 3                    | 0,08739761 |
| Leptailurus serval NC028316 1         | Catopuma badia NC028300 1                | 0,08746297 |
| Prionailurus planiceps NC028312 6     | Felis catus NC001700 2                   | 0,08746297 |
| Puma concolor NC016470 22             | Prionailurus bengalensis CKM45 20        | 0,08746534 |
| Tremarctos ornatus NC009969 2         | Arctodus simus NC011116 1                | 0,08749961 |
| Otocolobus manul NC028323 1           | Felis margarita NC028308 1               | 0,0875303  |
| Prionailurus rubiginosus NC028304 2   | Catopuma badia NC028300 1                | 0,0875303  |
| Prionailurus bengalensis CKM45 20     | Otocolobus manul NC028323 1              | 0,08753251 |
| Canis lupus familiaris NC002008 1231  | Canis adustus KT448271 1                 | 0,08755629 |
| Prionailurus bengalensis NC028301 12  | Lynx pardinus NC028319 161               | 0,08766496 |
| Mirounga leonina NC008422 1           | Lobodon carcinophaga NC008423 1          | 0,08766929 |
| Ichneumia albicauda T603 1            | Attilax paludinosus T606 1               | 0,08767136 |
| Prionailurus viverrinus NC028305 1    | Felis chaus NC028307 1                   | 0,08773231 |
| Prionailurus bengalensis CKM45 20     | Catopuma badia NC028300 1                | 0,08773467 |
| Panthera uncia KP202269 1             | Panthera tigris NC010642 35              | 0,08773831 |
| Canis lupus chanco NC010340 4         | Canis adustus KT448271 1                 | 0,08775297 |
| Prionailurus planiceps NC028312 6     | Leptailurus serval NC028316 1            | 0,08779962 |
| Prionailurus rubiginosus NC028304 2   | Lynx rufus NC014456 3                    | 0,08779962 |
| Panthera tigris NC010642 35           | Panthera onca KP202264 2                 | 0,08780185 |
| Prionailurus planiceps KY682741 4     | Felis catus NC001700 2                   | 0,08786695 |
| Mirounga angustirostris SRR10331586 1 | Leptonyx chotes weddellii NC008424 1     | 0,08787435 |
| Prionailurus planiceps KY682741 4     | Leptailurus serval NC028316 1            | 0,08793429 |
| Puma yagouaroundi NC028311 1          | Catopuma temminckii NC027115 41          | 0,08806895 |
| Puma yagouaroundi NC028311 1          | Prionailurus bengalensis NC028301 12     | 0,08806895 |
| Puma concolor NC016470 22             | Catopuma temminckii NC027115 41          | 0,08813628 |
| Prionailurus bengalensis CKM45 20     | Lynx pardinus NC028319 161               | 0,08813835 |
| Prionailurus rubiginosus NC028304 2   | Lynx canadensis NC028313 1               | 0,08820361 |
| Ursus semitorquatus MH464789 1        | Ursus javanicus/auropunctatus NC006835 1 | 0,08823071 |
| Prionailurus bengalensis NC028301 12  | Catopuma badia NC028300 1                | 0,08827094 |
| Puma concolor NC016470 22             | Pardofelis marmorata NLN3 2              | 0,08827094 |
| Ichneumia albicauda T603 1            | Xenogale naso C07XAR110 1                | 0,08827873 |
| Prionailurus rubiginosus NC028304 2   | Lynx pardinus NC028319 161               | 0,08833827 |
| Puma yagouaroundi NC028311 1          | Prionailurus rubiginosus NC028304 2      | 0,08833827 |
| Prionailurus bengalensis CKM45 20     | Lynx lynx NC027083 4                     | 0,08840768 |
| Mirounga angustirostris SRR10331586 1 | Hydrurga leptonyx NC008425 1             | 0,08841719 |
| Prionailurus planiceps NC028312 6     | Otocolobus manul NC028323 1              | 0,08847293 |
| Prionailurus viverrinus NC028305 1    | Leptailurus serval NC028316 1            | 0,08847418 |
| Otocolobus manul NC028323 1           | Felis nigripes NC028309 1                | 0,08854026 |
| Prionailurus bengalensis NC028301 12  | Lynx lynx NC027083 4                     | 0,08854026 |
| Canis anthus NC027956 2               | Canis adustus KT448271 1                 | 0,08859467 |
| Prionailurus viverrinus NC028305 1    | Felis catus NC001700 2                   | 0,08860936 |
| Ichneumia albicauda T603 1            | Galerella sanguinea T378 1               | 0,08861506 |
| Prionailurus planiceps KY682741 4     | Otocolobus manul NC028323 1              | 0,08867493 |
| Vulpes lagopus NC026529 3             | Vulpes ferrilata NC027935 1              | 0,08880361 |
| Lynx rufus NC014456 3                 | Felis silvestris lybica KP202275 4       | 0,08880959 |
| Canis mesomelas KT448280 1            | Canis adustus KT448271 1                 | 0,08884515 |
| Ursus semitorquatus MH464789 1        | Attilax paludinosus T606 1               | 0,08887692 |
| Ursus semitorquatus MH464789 1        | Ursus brachyura KY117547 1               | 0,08887692 |
| Mirounga angustirostris SRR10331586 1 | Lobodon carcinophaga NC008423 1          | 0,08888899 |
| Prionailurus bengalensis NC028301 12  | Lynx rufus NC014456 3                    | 0,08894425 |
| Ursus semitorquatus MH464789 1        | Xenogale naso C07XAR110 1                | 0,08894425 |
| Prionailurus viverrinus NC028305 1    | Felis margarita NC028308 1               | 0,08894588 |
| Puma yagouaroundi NC028311 1          | Prionailurus bengalensis CKM45 20        | 0,08894661 |
| Lynx lynx NC027083 4                  | Leopardus pardalis T262 1                | 0,08901356 |
| Lynx pardinus NC028319 161            | Acinonyx jubatus NC005212 3              | 0,08908793 |
| Prionailurus rubiginosus NC028304 2   | Lynx lynx NC027083 4                     | 0,08914624 |
| Lynx lynx NC027083 4                  | Leopardus pardalis NC028315 1            | 0,0891481  |
| Lynx rufus NC014456 3                 | Acinonyx jubatus NC005212 3              | 0,08915506 |
| Profelis aurata NC028299 1            | Prionailurus bengalensis NC028301 12     | 0,08934823 |
| Leptailurus serval NC028316 1         | Felis silvestris lybica KP202275 4       | 0,08941557 |
| Prionailurus rubiginosus NC028304 2   | Catopuma temminckii NC027115 41          | 0,08941557 |
| Lynx canadensis NC028313 1            | Acinonyx jubatus NC005212 3              | 0,0894248  |
| Prionailurus viverrinus NC028305 1    | Lynx canadensis NC028313 1               | 0,08955292 |
| Vulpes lagopus NC026529 3             | Vulpes corsac NC023958 1                 | 0,08961152 |
| Prionailurus bengalensis NC028301 12  | Leopardus pardalis T262 1                | 0,08961865 |
| Prionailurus viverrinus NC028305 1    | Otocolobus manul NC028323 1              | 0,08961871 |
| Lynx lynx NC027083 4                  | Acinonyx jubatus NC005212 3              | 0,08962687 |
| Lynx rufus NC014456 3                 | Felis margarita NC028308 1               | 0,08966489 |
| Prionailurus planiceps NC028312 6     | Felis nigripes NC028309 1                | 0,08968489 |
| Cynictis penicillata T375 1           | Attilax paludinosus T606 1               | 0,08975222 |
| Prionailurus bengalensis NC028301 12  | Catopuma temminckii NC027115 41          | 0,08975222 |
| Prionailurus planiceps KY682741 4     | Felis nigripes NC028309 1                | 0,08975222 |
| Puma concolor NC016470 22             | Felis chaus NC028307 1                   | 0,08981955 |
| Prionailurus bengalensis CKM45 20     | Catopuma temminckii NC027115 41          | 0,08982167 |
| Mungotictis declivineata NC027828 1   | Galidia elegans D146 1                   | 0,08994815 |
| Otocolobus manul NC028323 1           | Catopuma badia NC028300 1                | 0,08995421 |
| Profelis aurata NC028299 1            | Prionailurus rubiginosus NC028304 2      | 0,08995421 |
| Lynx rufus NC014456 3                 | Felis catus NC001700 2                   | 0,09002154 |
| Ursus semitorquatus MH464789 1        | Ursus javanicus T413 1                   | 0,09002154 |
| Xenogale naso C07XAR110 1             | Bdeogale nigripes GLC15 1                | 0,09002154 |
| Xenogale naso C07XAR110 1             | Cynictis penicillata T375 1              | 0,09002154 |
| Leptailurus serval NC028316 1         | Felis margarita NC028308 1               | 0,09008887 |
| Tremarctos ornatus NC009969 2         | Arctotherium sp NC030174 1               | 0,09012173 |
| Prionailurus planiceps KY682741 4     | Catopuma badia NC028300 1                | 0,0901562  |
| Arctotherium sp NC030174 1            | Arctodus simus NC011116 1                | 0,09022675 |
| Prionailurus bengalensis NC028301 12  | Caracal caracal NC028306 1               | 0,09029087 |
| Catopuma temminckii NC027115 41       | Acinonyx jubatus NC005212 3              | 0,09036648 |
| Lynx canadensis NC028313 1            | Leptailurus serval NC028316 1            | 0,09042553 |
| Pardofelis marmorata NLN3 2           | Lynx lynx NC027083 4                     | 0,09042553 |
| Puma concolor NC016470 22             | Leptailurus serval NC028316 1            | 0,09042553 |
| Prionailurus rubiginosus NC028304 2   | Leopardus pardalis T262 1                | 0,09042646 |
| Lynx canadensis NC028313 1            | Leopardus pardalis T262 1                | 0,09042745 |

|                                      |                                        |            |
|--------------------------------------|----------------------------------------|------------|
| Viverricula indica KX891751 1        | Mustela itatsi NC034330 19             | 0,18220885 |
| Vulpes vulpes NC008434 5             | Homotherium latidens MF871702 3        | 0,18220969 |
| Paradoxurus hermaphroditus NLNC 1    | Mustela altaica NC021751 1             | 0,18220988 |
| Prionailurus viverrinus NC028305 1   | Mustela sibirica AP017394 11           | 0,18221012 |
| Viverra zibetha T609 1               | Canis anthus NC027956 2                | 0,18221012 |
| Puma concolor NC016470 22            | Melogale moschata V0735A 1             | 0,18221036 |
| Martes americana NC020642 1          | Catopuma temminckii NC027115 41        | 0,1822104  |
| Vulpes vulpes NC008434 5             | Felis chaus NC028307 1                 | 0,18221056 |
| Prionailurus viverrinus NC028305 1   | Lutra sumatrana NC035810 1             | 0,18221074 |
| Vulpes vulpes NC008434 5             | Puma concolor NC016470 22              | 0,18221092 |
| Prionailurus rubiginosus NC028304 2  | Melogale moschata V0735A 1             | 0,18221121 |
| Vulpes zerdia KJ603240 1             | Leopardus wiedii NC028318 1            | 0,1822121  |
| Potos flavus T414 1                  | Leopardus jacobita NC028322 1          | 0,18221237 |
| Prionodon pardicolor NC024569 2      | Mustela erminea T305 2                 | 0,18221256 |
| Paradoxurus hermaphroditus NC03959   | Aillurus fulgens styani NC009691 1     | 0,18221262 |
| Ursus arctos GU573491 207            | Martes americana NC020642 1            | 0,18221236 |
| Genetta abyssinica MG489822 1        | Canis aureus KT448274 1                | 0,1822138  |
| Viverra zibetha T609 1               | Martes martes T302 3                   | 0,18221439 |
| Ursus thibetanus laniger MH281753 2  | Callorhinus ursinus NC008415 1         | 0,18221697 |
| Otocolobus manul NC028323 1          | Mustela altaica NC021751 1             | 0,18221705 |
| Paguma larvata PDD511 2              | Mustela nivialis T306 5                | 0,18221751 |
| Poecilogale albinucha T602 1         | Otaria byronia OTAB 1                  | 0,18221907 |
| Zalophus wolfebaeki SRR4431565 1     | Ursus maritimus GU573488 Svalbard      | 0,1822194  |
| Ichneumia albicauda T603 1           | Arctodus simus NC011116 1              | 0,18221942 |
| Prionailurus bengalensis CKM45 20    | Catopuma badia NC028300 1              | 0,18221962 |
| Melogale moschata KP726273 1         | Helarctos malayanus NC009968 2         | 0,18222022 |
| Mustela altaica NC021751 1           | Leopardus geyfroyi NC028320 1          | 0,18222085 |
| Puma concolor NC016470 22            | Arctodus simus NC011116 1              | 0,18222088 |
| Ursus spelaeus NC011112 8            | Martes pennanti NC020664 16            | 0,18222088 |
| Leopardus jacobita NC028322 1        | Arctodus simus NC011116 1              | 0,18222128 |
| Lynx canadensis NC028313 1           | Lycan pictus NC028427 2                | 0,18222181 |
| Melursus ursinus NC009970 2          | Enhydra lutris NC009692 1              | 0,18222189 |
| Melursus ursinus NC009970 2          | Arctocepalus gazella BK010918 1        | 0,18222272 |
| Cynictis penicillata T375 1          | Canis lupus chanco NC020640 4          | 0,18222405 |
| Taxidea taxus NC020646 1             | Panthera onca NC022842 1               | 0,18222605 |
| Puma yagouaroundi NC028311 1         | Lycalopex schuereae KT448284 1         | 0,18222724 |
| Ursus thibetanus laniger MH281753 2  | Martes martes T302 3                   | 0,18222886 |
| Arctocepalus pusillus NC008417 1     | Acinonyx jubatus NC005212 3            | 0,18223338 |
| Arctodus simus NC011116 1            | Arctictis binturong T605 2             | 0,18223353 |
| Panthera tigris amoyensis NC014770 2 | Canis adustus KT448271 1               | 0,18223517 |
| Ursus thibetanus thibetanus NC011116 | Arctocepalus forsteri NC004023 28      | 0,18223558 |
| Viverricula indica KX891751 1        | Mephitis mephitis NC020648 1           | 0,18223575 |
| Ursus thibetanus thibetanus NC011116 | Puma yagouaroundi NC028311 1           | 0,18223655 |
| Leptailurus serval NC028316 1        | Canis mesomelas KT448280 1             | 0,18223684 |
| Paradoxurus jerdoni MH464793 1       | Mephitis mephitis NC020648 1           | 0,18223709 |
| Pusa caspica NC008431 1              | Cuon alpinus NC013445 3                | 0,18223852 |
| Helarctos malayanus NC009968 2       | Catopuma badia NC028300 1              | 0,18223967 |
| Mustela erminea T305 2               | Ursus javanicus/auropunctatus NC006835 | 0,18224104 |
| Panthera leo NERO 19                 | Mustela kathiah NC023210 1             | 0,18224199 |
| Zalophus wolfebaeki SRR4431565 1     | Acinonyx jubatus NC005212 3            | 0,18224242 |
| Lynx lynx NC027083 4                 | Canis lupus familiaris NC002008 1231   | 0,18224439 |
| Lynx pardinus NC028319 161           | Canis lupus familiaris NC002008 1231   | 0,18224479 |
| Martes zibellina NC011579 39         | Genetta abyssinica MG489822 1          | 0,18224601 |
| Ursus americanus JX196366 3          | Arctocepalus forsteri NC004023 28      | 0,18224798 |
| Viverricula indica KX891751 1        | Ursus americanus JX196366 3            | 0,18225121 |
| Puma concolor NC016470 22            | Martes flavigula NC012141 3            | 0,18225195 |
| Ursus americanus JX196366 3          | Otaria byronia OTAB 1                  | 0,18225199 |
| Ursus americanus JX196366 3          | Aillurus fulgens NC011124 1            | 0,18225312 |
| Leopardus tigrinus NC028317 1        | Eumetopias jubatus NC004030 10         | 0,18225679 |
| Nasua nasua NC020647 2               | Mustela putorius NC020638 4            | 0,18225868 |
| Lycan pictus NC028427 1              | Civettictis civetta NC033778 1         | 0,18225904 |
| Prionailurus colocolo NC028314 1     | Canis lupus chanco NC010340 4          | 0,18225946 |
| Ommatophoca rossii AY377287etc 1     | Cryptoprocta ferax CFC13 1             | 0,18226214 |
| Lontra canadensis SRR10409165 1      | Aillurus fulgens NC011124 1            | 0,18226305 |
| Neophoca cinerea NC008419 1          | Martes americana NC020642 1            | 0,18226376 |
| Martes zibellina NC011579 39         | Galidictis fasciata DM333 1            | 0,18226551 |
| Tremarctos ornatus NC009969 2        | Arctocepalus gazella BK010918 1        | 0,18226764 |
| Profelis aurata NC028299 1           | Lutra lutra LC050126 1                 | 0,18227082 |
| Ursus arctos isabellinus 1885 2      | Taxidea taxus NC020646 1               | 0,18227169 |
| Mephitis mephitis NC020648 1         | Enhydra lutris NC009692 1              | 0,18227358 |
| Ursus thibetanus mupinensis NC00875  | Callorhinus ursinus NC008415 1         | 0,18227394 |
| Panthera uncia KP202269 1            | Mustela frenata NC020640 1             | 0,18227534 |
| Panthera pardus japonensis KJ866876  | Mustela kathiah NC023210 1             | 0,18227619 |
| Mustela itatsi NC034330 19           | Canis aureus KT448274 1                | 0,18227677 |
| Potos flavus T414 1                  | Lynx pardinus NC028319 161             | 0,18227771 |
| Mustela nigripes NC024942 1          | Arctotherium sp NC030174 1             | 0,18227734 |
| Vulpes corsac NC023958 1             | Prionailurus rubiginosus NC028304 2    | 0,18227845 |
| Martes americana NC020642 1          | Felis nigripes NC028309 1              | 0,18227872 |
| Mustela itatsi NC034330 19           | Leopardus guigna NC028321 1            | 0,18227947 |
| Vulpes zerdia KJ603240 1             | Pusa hispida NC 008433 1               | 0,18228057 |
| Viverra zibetha T609 1               | Procyon lotor AB462046 3               | 0,18228133 |
| Ursus arctos isabellinus 1885 2      | Mustela putorius NC020638 4            | 0,18228294 |
| Ursus arctos GU573491 207            | Mustela nigripes NC024942 1            | 0,18228319 |
| Prionailurus planiceps NC028312 6    | Aonyx cinerea NC035814 2               | 0,18228485 |
| Procyon lotor AB462046 3             | Leopardus pardalis T262 1              | 0,18228486 |
| Leopardus wiedii NC028318 1          | Aonyx cinerea NC035814 2               | 0,18228634 |
| Martes martes T302 3                 | Canis aureus KT448274 1                | 0,18228666 |
| Puma yagouaroundi NC028311 1         | Mustela nivialis T306 5                | 0,1822869  |
| Ursus arctos GU573486 5              | Martes americana NC020642 1            | 0,18228698 |
| Ursus thibetanus thibetanus NC011116 | Arctocepalus townsendi NC008420 1      | 0,18228756 |
| Otocolobus manul NC028323 1          | Martes martes T302 3                   | 0,18228763 |
| Ursus arctos GU573486 5              | Arctictis binturong NC020638 4         | 0,18228903 |
| Pusa caspica NC008431 1              | Arctictis binturong T605 2             | 0,18228963 |
| Ursus thibetanus laniger MH281753 2  | Arctocepalus townsendi NC008420 1      | 0,1822903  |
| Zalophus californianus NC008416 1    | Melogale moschata KP726273 1           | 0,18229178 |
| Zalophus wolfebaeki SRR4431565 1     | Viverra zibetha T609 1                 | 0,1822923  |
| Mustela itatsi NC034330 19           | Acinonyx jubatus NC005212 3            | 0,18229257 |
| Prionailurus planiceps NC028312 6    | Lycan pictus NC028427 2                | 0,18229294 |
| Martes melampus NC009678 1           | Leopardus colocolo NC028314 1          | 0,18229322 |
| Prionailurus bengalensis CKM45 20    | Bassariscus sumichrasti SRX109089 1    | 0,18229398 |
| Ursus spelaeus EU327344 13           | Meles anakuma NC009677 1               | 0,18229465 |
| Mustela kathiah NC023210 1           | Helarctos malayanus NC009968 2         | 0,18229596 |
| Potos flavus T414 1                  | Arctocepalus forsteri NC004023 28      | 0,18229817 |

|                                       |                                       |            |
|---------------------------------------|---------------------------------------|------------|
| Pardofelis marmorata NLN3 2           | Catopuma badia NC028300 1             | 0,09049286 |
| Prionailurus bengalensis NC028301 12  | Leopardus pardalis NC028315 1         | 0,09056117 |
| Prionailurus rubiginosus NC028304 2   | Leopardus wiedii NC028318 1           | 0,09056121 |
| Prionailurus bengalensis NC028301 12  | Leopardus wiedii NC028318 1           | 0,09056132 |
| Prionailurus bengalensis NC028301 12  | Leopardus colocolo NC028314 1         | 0,09057286 |
| Cuon alpinus NC013445 3               | Canis mesomelas KT448280 1            | 0,09059604 |
| Prionailurus rubiginosus NC028304 2   | Leopardus colocolo NC028314 1         | 0,09063948 |
| Bdeogale nigripes GLC15 1             | Attilax paludinosus T606 1            | 0,09069486 |
| Lynx pardinus NC028319 161            | Felis silvestris lybica KP202275 4    | 0,09076219 |
| Prionailurus planiceps KY682741 4     | Lynx canadensis NC028313 1            | 0,09076219 |
| Leptailurus serval NC028316 1         | Felis catus NC001700 2                | 0,09082952 |
| Leptailurus serval NC028316 1         | Felis chaus NC028307 1                | 0,09082952 |
| Prionailurus planiceps NC028312 6     | Lynx canadensis NC028313 1            | 0,09082952 |
| Prionailurus rubiginosus NC028304 2   | Caracal caracal NC028306 1            | 0,09082952 |
| Prionailurus viverrinus NC028305 1    | Felis nigripes NC028309 1             | 0,09083121 |
| Prionailurus viverrinus NC028305 1    | Lynx pardinus NC028319 161            | 0,09089933 |
| Panthera uncia NC010638 1             | Panthera tigris NC010642 35           | 0,09090304 |
| Prionailurus planiceps NC028312 6     | Catopuma badia NC028300 1             | 0,09096418 |
| Puma yagouaroundi NC028311 1          | Otocolobus manul NC028323 1           | 0,09096418 |
| Lynx lynx NC027083 4                  | Leopardus wiedii NC028318 1           | 0,09103357 |
| Profelis aurata NC028299 1            | Prionailurus bengalensis CKM45 20     | 0,09103382 |
| Otocolobus manul NC028323 1           | Leptailurus serval NC028316 1         | 0,09109885 |
| Puma yagouaroundi NC028311 1          | Felis silvestris lybica KP202275 4    | 0,09109885 |
| Prionailurus rubiginosus NC028304 2   | Acinonyx jubatus NC005212 3           | 0,09110758 |
| Prionailurus bengalensis NC028301 12  | Acinonyx jubatus NC005212 3           | 0,09110759 |
| Lynx pardinus NC028319 161            | Leptailurus serval NC028316 1         | 0,09116618 |
| Prionailurus planiceps NC028312 6     | Lynx rufus NC014456 3                 | 0,09116618 |
| Leopardus pardalis NC028315 1         | Felis silvestris lybica KP202275 4    | 0,09116718 |
| Lynx canadensis NC028313 1            | Felis silvestris lybica KP202275 4    | 0,09123351 |
| Prionailurus planiceps KY682741 4     | Lynx lynx NC027083 4                  | 0,09130084 |
| Prionailurus rubiginosus NC028304 2   | Leopardus pardalis NC028315 1         | 0,09130177 |
| Leptailurus serval NC028316 1         | Catopuma temminckii NC027115 41       | 0,09136817 |
| Profelis aurata NC028299 1            | Catopuma badia NC028300 1             | 0,09136817 |
| Puma yagouaroundi NC028311 1          | Leptailurus serval NC028316 1         | 0,09143555 |
| Lynx pardinus NC028319 161            | Leopardus pardalis T262 1             | 0,09143721 |
| Parahyaena brunnea NC038159 15        | Crocota crocata NC020670 3            | 0,09149743 |
| Prionailurus planiceps NC028312 6     | Lynx lynx NC027083 4                  | 0,09150283 |
| Profelis aurata NC028299 1            | Prionailurus viverrinus NC028305 1    | 0,09150372 |
| Prionailurus bengalensis NC028301 12  | Leopardus jacobita NC028322 1         | 0,09150407 |
| Prionailurus rubiginosus NC028304 2   | Leopardus geoffroyi NC028320 1        | 0,09150545 |
| Leptailurus serval NC028316 1         | Leopardus wiedii NC028318 1           | 0,09157097 |
| Prionailurus viverrinus NC028305 1    | Lynx lynx NC027083 4                  | 0,09157287 |
| Prionailurus rubiginosus NC028304 2   | Leopardus jacobita NC028322 1         | 0,09163869 |
| Hemigalus derbyanus MH464791 1        | Chrotogale owstoni T607 1             | 0,09163979 |
| Felis silvestris lybica KP202275 4    | Catopuma badia NC028300 1             | 0,09170482 |
| Prionailurus bengalensis CKM45 20     | Caracal caracal NC028306 1            | 0,09170718 |
| Prionailurus rubiginosus NC028304 2   | Leopardus guigna NC028321 1           | 0,09170756 |
| Felis silvestris lybica KP202275 4    | Catopuma temminckii NC027115 41       | 0,09177215 |
| Pardofelis marmorata NLN3 2           | Catopuma temminckii NC027115 41       | 0,09177215 |
| Prionailurus planiceps KY682741 4     | Lynx pardinus NC028319 161            | 0,09177215 |
| Profelis aurata NC028299 1            | Felis chaus NC028307 1                | 0,09177215 |
| Puma concolor NC016470 22             | Felis silvestris lybica KP202275 4    | 0,09177215 |
| Felis chaus NC028307 1                | Caracal caracal NC028306 1            | 0,09183948 |
| Pardofelis marmorata NLN3 2           | Lynx pardinus NC028319 161            | 0,09183948 |
| Prionailurus viverrinus NC028305 1    | Catopuma badia NC028300 1             | 0,09184115 |
| Prionailurus planiceps NC028312 6     | Lynx pardinus NC028319 161            | 0,09190682 |
| Puma concolor NC016470 22             | Prionailurus planiceps KY682741 4     | 0,09190682 |
| Puma yagouaroundi NC028311 1          | Felis margarita NC028308 1            | 0,09190682 |
| Puma concolor NC016470 22             | Prionailurus viverrinus NC028305 1    | 0,09190849 |
| Xenogale naso C07XAR110 1             | Urva javanica/auropunctata NC006835 1 | 0,09193436 |
| Pardofelis marmorata NLN3 2           | Lynx canadensis NC028313 1            | 0,09204148 |
| Lynx pardinus NC028319 161            | Felis catus NC001700 2                | 0,09210881 |
| Lynx pardinus NC028319 161            | Felis margarita NC028308 1            | 0,09210881 |
| Urva javanica/auropunctata NC006835 1 | Attilax paludinosus T606 1            | 0,09213674 |
| Puma concolor NC016470 22             | Prionailurus planiceps NC028312 6     | 0,09217614 |
| Puma yagouaroundi NC028311 1          | Felis chaus NC028307 1                | 0,09217614 |
| Prionailurus viverrinus NC028305 1    | Lynx rufus NC014456 3                 | 0,09217859 |
| Galerella sanguinea T378 1            | Bdeogale nigripes GLC15 1             | 0,09218321 |
| Felis silvestris lybica KP202275 4    | Caracal caracal NC028306 1            | 0,0923108  |
| Lynx lynx NC027083 4                  | Felis silvestris lybica KP202275 4    | 0,0923108  |
| Prionailurus planiceps KY682741 4     | Lynx rufus NC014456 3                 | 0,0923108  |
| Puma yagouaroundi NC028311 1          | Prionailurus planiceps KY682741 4     | 0,0923108  |
| Lynx pardinus NC028319 161            | Leopardus pardalis NC028315 1         | 0,09231241 |
| Galerella sanguinea T378 1            | Cynictis penicillata T375 1           | 0,09231783 |
| Profelis aurata NC028299 1            | Catopuma temminckii NC027115 41       | 0,09232933 |
| Leopardus pardalis T262 1             | Catopuma badia NC028300 1             | 0,09237938 |
| Lynx canadensis NC028313 1            | Leopardus pardalis NC028315 1         | 0,09238002 |
| Urva javanica/auropunctata NC006835 1 | Cynictis penicillata T375 1           | 0,09240516 |
| Hyena hyaena NC020669 1               | Crocota crocata NC020670 3            | 0,09244063 |
| Felis margarita NC028308 1            | Catopuma temminckii NC027115 41       | 0,09244546 |
| Puma concolor NC016470 22             | Felis margarita NC028308 1            | 0,09244546 |
| Leopardus pardalis NC028315 1         | Felis margarita NC028308 1            | 0,09244627 |
| Prionailurus planiceps KY682741 4     | Leopardus pardalis T262 1             | 0,09244666 |
| Felis catus NC001700 2                | Catopuma temminckii NC027115 41       | 0,09251279 |
| Felis chaus NC028307 1                | Catopuma badia NC028300 1             | 0,09251279 |
| Felis nigripes NC028309 1             | Catopuma badia NC028300 1             | 0,09258012 |
| Lynx canadensis NC028313 1            | Felis catus NC001700 2                | 0,09258012 |
| Lynx canadensis NC028313 1            | Felis chaus NC028307 1                | 0,09258012 |
| Lynx lynx NC027083 4                  | Leptailurus serval NC028316 1         | 0,09258012 |
| Lynx rufus NC014456 3                 | Leptailurus serval NC028316 1         | 0,09258012 |
| Prionailurus planiceps KY682741 4     | Catopuma temminckii NC027115 41       | 0,09258012 |
| Puma concolor NC016470 22             | Felis nigripes NC028309 1             | 0,09258012 |
| Prionailurus rubiginosus NC028304 2   | Leopardus tigrinus NC028317 1         | 0,09258125 |
| Viverra zibetha T609 1                | Civettictis civetta GLC19 1           | 0,09258636 |
| Otocolobus manul NC028323 1           | Catopuma temminckii NC027115 41       | 0,09264746 |
| Prionailurus planiceps NC028312 6     | Catopuma temminckii NC027115 41       | 0,09264746 |
| Puma yagouaroundi NC028311 1          | Prionailurus planiceps NC028312 6     | 0,09264746 |
| Otocolobus manul NC028323 1           | Leopardus pardalis T262 1             | 0,09264813 |
| Lynx rufus NC014456 3                 | Leopardus pardalis NC028315 1         | 0,09264899 |
| Lynx canadensis NC028313 1            | Felis margarita NC028308 1            | 0,09271479 |
| Lynx pardinus NC028319 161            | Felis chaus NC028307 1                | 0,09271479 |
| Prionailurus viverrinus NC028305 1    | Catopuma temminckii NC027115 41       | 0,09271641 |
| Lynx pardinus NC028319 161            | Leopardus colocolo NC028314 1         | 0,09272693 |

|                                      |                                      |            |
|--------------------------------------|--------------------------------------|------------|
| Viverra zibetha T609 1               | Ursus spelaeus NC011112 8            | 0,18229833 |
| Ursus arctos AP012576 6              | Mustela nigripes NC024942 1          | 0,18229842 |
| Ursus thibetanus laniger MH281753 2  | Genetta servalina NC0024568 2        | 0,18229868 |
| Zalophus californianus NC008416 1    | Ursus arctos EU497665 29             | 0,18230158 |
| Ursus thibetanus thibetanus NC011111 | Catopuma temminckii NC027115 41      | 0,18230562 |
| Zalophus californianus NC008416 1    | Leopardus pardalis T262 1            | 0,18231107 |
| Prionailurus planiceps KY682741 4    | Canis lupus familiaris NC002008 1231 | 0,18231241 |
| Vulpes zerda KJ603240 1              | Civettictis civetta NC033378 1       | 0,18231572 |
| Tremarctos ornatus NC009969 2        | Canis adustus KT448271 1             | 0,18231912 |
| Martes flavigula NC012141 3          | Leopardus tigrinus NC028317 1        | 0,18232088 |
| Spilogale putorius NC010497 1        | Martes martes T302 3                 | 0,18232316 |
| Mungos mungo MCM7 1                  | Enhydra lutris NC009692 1            | 0,18232538 |
| Meles anakuma NC009677 1             | Arctocepalus australis MG023139 1    | 0,18232584 |
| Mungos mungo MCM7 1                  | Arctonyx collaris NC020645 1         | 0,18232796 |
| Mustela kathiah NC023210 1           | Arctocepalus forsteri KT693377 17    | 0,18232812 |
| Callorhinus ursinus NC008415 1       | Bassaricyon neblina SRX1097850 1     | 0,18233131 |
| Vulpes corsac NC023958 1             | Pusa caspica NC008431 1              | 0,1823319  |
| Neophoca cinerea NC008419 1          | Fossa fossana D350 1                 | 0,18233253 |
| Melogale moschata KP726273 1         | Galidictis fasciata DM333 1          | 0,18233316 |
| Lutra lutra LC050126 1               | Genetta abyssinica MG489822 1        | 0,18233329 |
| Vulpes corsac NC023958 1             | Mirounga leonina NC008422 1          | 0,18233383 |
| Mungotictis decemlineata NC027828    | Meles meles T303 3                   | 0,18233384 |
| Martes pennanti NC020664 16          | Crossarchus platycephalus C7R66 1    | 0,18233545 |
| Mustela erminea T305 2               | Galidictis fasciata DM333 1          | 0,18233714 |
| Vulpes vulpes NC008434 5             | Hemigalus derbyanus MH464791 1       | 0,1823374  |
| Martes zibellina NC011579 39         | Genetta servalina NC0024568 2        | 0,18234079 |
| Otocolobus manul NC028323 1          | Meles anakuma NC009677 1             | 0,18234088 |
| Meles anakuma NC009677 1             | Civettictis civetta GLC19 1          | 0,18234123 |
| Parahyaena brunnea NC038159 15       | Ommatophoca rossii AY377287etc 1     | 0,18234135 |
| Ictonyx striatus T299 1              | Callorhinus ursinus NC008415 1       | 0,1823418  |
| Paradoxurus jerdoni MH464793 1       | Mustela eversmannii NC028013 1       | 0,18234262 |
| Mustela kathiah NC023210 1           | Caracal caracal NC028306 1           | 0,18234381 |
| Ursus thibetanus mupinensis NC00875  | Enhydra lutris NC009692 1            | 0,18234394 |
| Lutra sumatrana NC035810 1           | Felis nigripes NC020664 16           | 0,18234397 |
| Mustela nigripes NC024942 1          | Felis catus NC001700 2               | 0,18234412 |
| Ursus arctos prunosus MG066703 3     | Arctotherium sp NC030174 1           | 0,18234417 |
| Lynx lynx NC027083 4                 | Callorhinus ursinus NC008415 1       | 0,18234443 |
| Prionailurus planiceps NC028312 6    | Melogale moschata KP726273 1         | 0,18234511 |
| Melogale moschata V0735A 1           | Felis nigripes NC028309 1            | 0,18234575 |
| Neovison vison NC020641 3            | Ichneumia albicauda T603 1           | 0,18234611 |
| Ursus arctos prunosus MG066703 3     | Meles leucurus NC039173 4            | 0,18234624 |
| Lynx lynx NC027083 4                 | Canis latrans NC008093 7             | 0,18234636 |
| Viverra zibetha T609 1               | Martes pennanti NC020664 16          | 0,18234658 |
| Smilodon populator MF871700 1        | Canis aureus KT448274 1              | 0,18234697 |
| Martes americana NC020642 1          | Leopardus guigna NC028321 1          | 0,18234743 |
| Martes zibellina NC011579 39         | Leopardus jacobita NC028322 1        | 0,18234752 |
| Ursus arctos isabellinus 1885 2      | Martes americana NC020642 1          | 0,1823485  |
| Tremarctos ornatus NC009969 2        | Prionailurus bengalensis CKM45 20    | 0,18234852 |
| Mustela nigripes NC024942 1          | Lycyon pictus NC028427 2             | 0,18234853 |
| Vulpes vulpes NC008434 5             | Catopuma badia NC028300 1            | 0,18234886 |
| Lynx canadensis NC028313 1           | Aonyx cinerea NC035814 2             | 0,18234922 |
| Prionailurus bengalensis NC028301 12 | Neophoca cinerea NC008419 1          | 0,18234932 |
| Nyctereutes procyonoides NC013700 3  | Leptailurus serval NC028316 1        | 0,18234967 |
| Martes zibellina NC011579 39         | Canis aureus KT448274 1              | 0,18235061 |
| Ursus arctos GU573491 207            | Melogale moschata NC020644 1         | 0,18235146 |
| Martes melampus NC009678 1           | Helarctos malayanus NC009968 2       | 0,18235177 |
| Phoca groenlandica NC008429 54       | Panthera uncia KP202269 1            | 0,18235216 |
| Prionailurus planiceps KY682741 4    | Melogale moschata NC020644 1         | 0,18235232 |
| Leopardus tigrinus NC028317 1        | Arctocepalus pusillus NC008417 1     | 0,18235271 |
| Catopuma temminckii NC027115 41      | Canis aureus KT448274 1              | 0,18235393 |
| Zalophus wollebaeki SRR4431565 1     | Ursus maritimus NC003428 31          | 0,18235406 |
| Martes martes T302 3                 | Leptailurus serval NC028316 1        | 0,18235511 |
| Lutra lutra NC011358 9               | Arctocepalus forsteri NC004023 28    | 0,18235566 |
| Pusa hispida NC 008433 1             | Otocyon megalotis SAF1 2             | 0,18235604 |
| Lynx pardinus NC028319 161           | Lycyon pictus NC028427 2             | 0,18235736 |
| Arctictis binturong T605 2           | Ailuurs fulgens NC011124 1           | 0,1823599  |
| Ursus arctos GU573486 5              | Martes martes T302 3                 | 0,18236028 |
| Ursus arctos AP012576 6              | Mustela sibirica AP017394 11         | 0,18236203 |
| Felis margarita NC028308 1           | Canis aureus KT448274 1              | 0,1823622  |
| Ursus arctos AP012576 6              | Mustela kathiah NC023210 1           | 0,18236229 |
| Mustela kathiah NC023210 1           | Ailuropoda melanoleuca NC009492 5    | 0,18236251 |
| Ursus arctos AP012576 6              | Ailuurs fulgens styani NC009691 5    | 0,18236256 |
| Proteles cristata T393 6             | Mirounga angustirostris SRR10331586  | 0,18236361 |
| Diplogale hosei MH464790 1           | Bassaricyon sumichrasti SRX1099089 1 | 0,18236551 |
| Mustela nivalis T306 5               | Mephitis mephitis NC020648 1         | 0,18236566 |
| Ursus spelaeus EU327344 13           | Neophoca cinerea NC008419 1          | 0,18236603 |
| Zalophus californianus NC008416 1    | Procyon lotor AB462049 4             | 0,18236788 |
| Canis lupus chanco NC010340 4        | Attilax paludinosus T606 1           | 0,18236811 |
| Ursus thibetanus laniger MH281753 2  | Leopardus pardalis NC028315 1        | 0,18236823 |
| Viverricula indica NC025296 2        | Ursus thibetanus laniger MH281753 2  | 0,18236825 |
| Leopardus pardalis NC028315 1        | Canis lupus chanco NC010340 4        | 0,18237093 |
| Ursus thibetanus laniger MH281753 2  | Caracal caracal NC028306 1           | 0,18237117 |
| Ursus thibetanus mupinensis NC00875  | Acinonyx jubatus NC005212 3          | 0,18237536 |
| Phoca vitulina NC001325 1            | Canis mesomelas KT448280 1           | 0,18237616 |
| Zalophus californianus NC008416 1    | Prionailurus bengalensis NC028301 12 | 0,18237759 |
| Neophoca cinerea NC008419 1          | Canis adustus KT448271 1             | 0,18237978 |
| Mustela nigripes NC024942 1          | Civettictis civetta NC033378 1       | 0,18238309 |
| Viverricula indica KX891745 1        | Cuon alpinus NC013445 3              | 0,18239017 |
| Felis catus NC001700 2               | Canis lupus chanco NC010340 4        | 0,18239054 |
| Canis adustus KT448271 1             | Arctocepalus forsteri KT693377 17    | 0,18239364 |
| Ursus thibetanus mupinensis NC00875  | Homotherium latidens MF871702 3      | 0,18239452 |
| Mungos mungo MCM7 1                  | Meles leucurus NC039173 4            | 0,18239507 |
| Leopardus moschata KP726273 1        | Arctocepalus forsteri KT693377 17    | 0,18239731 |
| Martes melampus NC009678 1           | Canis latrans NC008093 7             | 0,18239802 |
| Mustela itatsi NC034330 19           | Urva semitorquata MH464789 1         | 0,18239848 |
| Ursus arctos isabellinus 1885 2      | Martes flavigula NC012141 3          | 0,18239935 |
| Prionodon linsang ERR2391707 1       | Meles meles T303 3                   | 0,18239968 |
| Martes americana NC020642 1          | Galidictis fasciata DM333 1          | 0,18239997 |
| Canis latrans NC008093 7             | Attilax paludinosus T606 1           | 0,18240042 |
| Salanoia concolor D378 1             | Aonyx cinerea NC035814 2             | 0,18240345 |
| Leopardus jacobita NC028322 1        | Ailuurs fulgens styani NC009691 1    | 0,18240692 |
| Mustela altaica NC021751 1           | Arctocepalus gaeana BK010918 1       | 0,18240903 |
| Lutra sumatrana NC035810 1           | Catopuma temminckii NC027115 41      | 0,18241039 |



|                                      |                                        |            |
|--------------------------------------|----------------------------------------|------------|
| Prionailurus viverrinus NCO28305 1   | Leopardus pardalis T262 1              | 0,09277587 |
| Pardofelis marmorata NLN3 2          | Lynx rufus NCO14456 3                  | 0,09278212 |
| Leopardus pardalis NCO28315 1        | Felis catus NCO01700 2                 | 0,09278303 |
| Prionailurus viverrinus NCO28305 1   | Caracal caracal NCO28306 1             | 0,09278335 |
| Lynx canadensis NCO28313 1           | Leopardus wiedii NCO28318 1            | 0,09278409 |
| Felis margarita NCO28308 1           | Catopuma badia NCO28300 1              | 0,09284945 |
| Profelis aurata NCO28299 1           | Felis nigripes NCO28309 1              | 0,09284945 |
| Puma concolor NCO16470 22            | Otocolobus manul NCO28323 1            | 0,09284945 |
| Lynx rufus NCO14456 3                | Leopardus pardalis T262 1              | 0,09285109 |
| Prionailurus bengalensis CKM45 20    | Leopardus jacobita NCO28322 1          | 0,09285315 |
| Prionailurus bengalensis CKM45 20    | Acinonyx jubatus NCO05212 3            | 0,09286079 |
| Felis catus NCO01700 2               | Caracal caracal NCO28306 1             | 0,09291678 |
| Felis catus NCO01700 2               | Catopuma badia NCO28300 1              | 0,09291678 |
| Prionailurus bengalensis NCO28301 12 | Leopardus tigrinus NCO28317 1          | 0,09291799 |
| Lynx pardinus NCO28319 161           | Leopardus guigna NCO28321 1            | 0,09291822 |
| Prionailurus bengalensis CKM45 20    | Leopardus pardalis NCO28315 1          | 0,0929202  |
| Leptailurus serval NCO28316 1        | Felis nigripes NCO28309 1              | 0,09298411 |
| Leopardus pardalis NCO28315 1        | Felis chaus NCO28307 1                 | 0,09298442 |
| Galerella sanguinea T378 1           | Attilax paludinosus T606 1             | 0,09299108 |
| Prionailurus bengalensis NCO28301 12 | Pardofelis marmorata NLN3 2            | 0,09305144 |
| Prionailurus rubiginosus NCO28304 2  | Pardofelis marmorata NLN3 2            | 0,09305144 |
| Profelis aurata NCO28299 1           | Prionailurus planiceps KY682741 4      | 0,09305144 |
| Puma concolor NCO16470 22            | Felis catus NCO01700 2                 | 0,09305144 |
| Puma concolor NCO16470 22            | Profelis aurata NCO28299 1             | 0,09305144 |
| Leptailurus serval NCO28316 1        | Leopardus pardalis T262 1              | 0,09305214 |
| Lynx rufus NCO14456 3                | Leopardus jacobita NCO28322 1          | 0,09305337 |
| Urus semitorquata MH464789 1         | Galerella sanguinea T378 1             | 0,09305834 |
| Catopuma badia NCO28300 1            | Caracal caracal NCO28306 1             | 0,09311877 |
| Profelis aurata NCO28299 1           | Felis silvestris lybica KP202275 4     | 0,09311877 |
| Profelis aurata NCO28299 1           | Prionailurus planiceps NCO28312 6      | 0,09311877 |
| Urus semitorquata MH464789 1         | Cynictis penicillata T375 1            | 0,09311877 |
| Leptailurus serval NCO28316 1        | Leopardus pardalis NCO28315 1          | 0,09311936 |
| Felis nigripes NCO28309 1            | Catopuma temminckii NCO27115 41        | 0,0931861  |
| Otocolobus manul NCO28323 1          | Caracal caracal NCO28306 1             | 0,0931861  |
| Ichneumia albicauda T603 1           | Urus semitorquata MH464789 1           | 0,0931931  |
| Prionailurus planiceps NCO28312 6    | Acinonyx jubatus NCO05212 3            | 0,09319531 |
| Viverra zibetha T609 1               | Civettictis civetta NCO33378 1         | 0,09321253 |
| Prionailurus planiceps KY682741 4    | Caracal caracal NCO28306 1             | 0,09325343 |
| Puma yagouaroundi NCO28311 1         | Felis catus NCO01700 2                 | 0,09325343 |
| Prionailurus bengalensis CKM45 20    | Leopardus pardalis T262 1              | 0,09325701 |
| Prionailurus planiceps KY682741 4    | Acinonyx jubatus NCO05212 3            | 0,09326264 |
| Lynx lynx NCO27083 4                 | Leopardus guigna NCO28321 1            | 0,0933217  |
| Puma concolor NCO16470 22            | Leopardus pardalis T262 1              | 0,09332199 |
| Prionailurus planiceps NCO28312 6    | Leopardus pardalis T262 1              | 0,09338939 |
| Prionailurus bengalensis CKM45 20    | Leopardus wiedii NCO28318 1            | 0,09339172 |
| Monachus schauinslandi NCO08421 1    | Lobodon carcinophaga NCO08423 1        | 0,09339806 |
| Leopardus pardalis T262 1            | Felis silvestris lybica KP202275 4     | 0,09345662 |
| Puma yagouaroundi NCO28311 1         | Felis nigripes NCO28309 1              | 0,09352276 |
| Puma yagouaroundi NCO28311 1         | Pardofelis marmorata NLN3 2            | 0,09352276 |
| Prionailurus viverrinus NCO28305 1   | Leopardus pardalis NCO28315 1          | 0,09358378 |
| Felis chaus NCO28307 1               | Catopuma temminckii NCO27115 41        | 0,09359009 |
| Lynx canadensis NCO28313 1           | Felis nigripes NCO28309 1              | 0,09359009 |
| Prionailurus bengalensis CKM45 20    | Pardofelis marmorata NLN3 2            | 0,09359237 |
| Leopardus colocolo NCO28314 1        | Catopuma badia NCO28300 1              | 0,09360321 |
| Otocolobus manul NCO28323 1          | Leopardus wiedii NCO28318 1            | 0,09365823 |
| Xenogale naso C07XAR110 1            | Galerella sanguinea T378 1             | 0,09366501 |
| Profelis aurata NCO28299 1           | Felis catus NCO01700 2                 | 0,09372475 |
| Leopardus pardalis T262 1            | Felis chaus NCO28307 1                 | 0,0937251  |
| Lynx pardinus NCO28319 161           | Leopardus wiedii NCO28318 1            | 0,09372648 |
| Prionailurus bengalensis NCO28301 12 | Leopardus guigna NCO28321 1            | 0,09372765 |
| Prionailurus bengalensis CKM45 20    | Leopardus colocolo NCO28314 1          | 0,09374026 |
| Lynx lynx NCO27083 4                 | Felis catus NCO01700 2                 | 0,09379208 |
| Otocolobus manul NCO28323 1          | Lynx pardinus NCO28319 161             | 0,09379208 |
| Profelis aurata NCO28299 1           | Otocolobus manul NCO28323 1            | 0,09379208 |
| Xenogale naso C07XAR110 1            | Urus brachyura KY117547 1              | 0,09379208 |
| Ichneumia albicauda T603 1           | Urus javanicus/auropunctata NCO06835 1 | 0,09382721 |
| Monachus schauinslandi NCO08421 1    | Leptonychotes weddellii NCO08424 1     | 0,0938646  |
| Leptailurus serval NCO28316 1        | Acinonyx jubatus NCO05212 3            | 0,09386808 |
| Monachus monachus NCO44972 5         | Leptonychotes weddellii NCO08424 1     | 0,09388591 |
| Monachus monachus NCO44972 5         | Lobodon carcinophaga NCO08423 1        | 0,09388975 |
| Monachus monachus NCO44972 5         | Hydrurga leptonyx NCO08425 1           | 0,09389012 |
| Leopardus pardalis NCO28315 1        | Catopuma badia NCO28300 1              | 0,09392797 |
| Lynx lynx NCO27083 4                 | Felis chaus NCO28307 1                 | 0,09399407 |
| Lynx lynx NCO27083 4                 | Felis margarita NCO28308 1             | 0,09399407 |
| Prionailurus planiceps NCO28312 6    | Caracal caracal NCO28306 1             | 0,09399407 |
| Otocolobus manul NCO28323 1          | Leopardus colocolo NCO28314 1          | 0,09400662 |
| Prionailurus planiceps KY682741 4    | Leopardus colocolo NCO28314 1          | 0,09400681 |
| Puma concolor NCO16470 22            | Leopardus pardalis NCO28315 1          | 0,09406251 |
| Puma concolor NCO16470 22            | Leopardus jacobita NCO28322 1          | 0,09406263 |
| Prionailurus planiceps NCO28312 6    | Leopardus jacobita NCO28322 1          | 0,0940631  |
| Prionailurus bengalensis NCO28301 12 | Leopardus geoffroyi NCO28320 1         | 0,09406418 |
| Felis margarita NCO28308 1           | Caracal caracal NCO28306 1             | 0,09412874 |
| Zalophus wolfebaeki SRR4431565 1     | Callorhinus ursinus NCO08415 1         | 0,09415544 |
| Zalophus californianus NCO08416 1    | Callorhinus ursinus NCO08415 1         | 0,09416326 |
| Puma yagouaroundi NCO28311 1         | Profelis aurata NCO28299 1             | 0,09419607 |
| Hemigalus derbyanus MH464791 1       | Diplogale hosei MH464790 1             | 0,0942509  |
| Lynx rufus NCO14456 3                | Felis chaus NCO28307 1                 | 0,0942634  |
| Prionailurus planiceps NCO28312 6    | Leopardus pardalis NCO28315 1          | 0,09426478 |
| Prionailurus planiceps KY682741 4    | Leopardus jacobita NCO28322 1          | 0,09426499 |
| Prionailurus planiceps NCO28312 6    | Pardofelis marmorata NLN3 2            | 0,09433073 |
| Urus javanicus T413 1                | Cynictis penicillata T375 1            | 0,09433073 |
| Urus semitorquata MH464789 1         | Bdeogale nigripes GLC15 1              | 0,09433073 |
| Otocolobus manul NCO28323 1          | Leopardus pardalis NCO28315 1          | 0,09433138 |
| Leopardus wiedii NCO28318 1          | Catopuma badia NCO28300 1              | 0,09433203 |
| Ichneumia albicauda T603 1           | Urus brachyura KY117547 1              | 0,09433827 |
| Lynx canadensis NCO28313 1           | Leopardus guigna NCO28321 1            | 0,09439921 |
| Prionailurus planiceps KY682741 4    | Leopardus pardalis NCO28315 1          | 0,09439933 |
| Leptailurus serval NCO28316 1        | Leopardus colocolo NCO28314 1          | 0,09441056 |
| Prionailurus planiceps NCO28312 6    | Leopardus colocolo NCO28314 1          | 0,09447823 |
| Lynx rufus NCO14456 3                | Felis nigripes NCO28309 1              | 0,09453272 |
| Xenogale naso C07XAR110 1            | Urus javanicus T413 1                  | 0,09453272 |
| Leopardus colocolo NCO28314 1        | Felis silvestris lybica KP202275 4     | 0,09454498 |
| Prionailurus planiceps KY682741 4    | Pardofelis marmorata NLN3 2            | 0,09460005 |

|                                      |                                       |            |
|--------------------------------------|---------------------------------------|------------|
| Vulpes zerda KJ603240 1              | Civettictis civetta GLC19 1           | 0,18241039 |
| Potos flavus T414 1                  | Genetta genetta T297 1                | 0,18241058 |
| Viverra tangalunga MH464792 1        | Paradoxurus hermaphroditus NLNC 1     | 0,1824109  |
| Prionailurus bengalensis CKM45 20    | Meles anakuma NCO09677 1              | 0,18241166 |
| Paguma larvata PDD511 2              | Conepatus chinga NCO42596 1           | 0,18241224 |
| Paradoxurus jerdoni MH464793 1       | Melogale moschata NCO20644 1          | 0,18241225 |
| Vulpes vulpes NCO08434 5             | Felis silvestris lybica KP202275 4    | 0,18241264 |
| Prionailurus planiceps KY682741 4    | Melogale moschata KP726273 1          | 0,18241267 |
| Vulpes lagopus NCO26529 3            | Leopardus pardalis T262 1             | 0,1824128  |
| Bassariscus sumichrasti SRX1099089 1 | Arctotherium sp NCO30174 1            | 0,18241283 |
| Mustela erminea T305 2               | Cryptoprocta ferox FC13 1             | 0,18241306 |
| Melogale moschata V0735A 1           | Leopardus jacobita NCO28322 1         | 0,18241309 |
| Nasua nasua NCO20647 1               | Mirounga angustirostris SRR10331586 1 | 0,18241349 |
| Puma yagouaroundi NCO28311 1         | Martes zibellina NCO11579 39          | 0,182414   |
| Otaria byronia OTAB 1                | Mustela nivalis T306 5                | 0,18241531 |
| Ursus maritimus GU573488 Svalbard    | Ailurus fulgens NCO11124 1            | 0,18241547 |
| Procyon lotor AB462046 3             | Civettictis civetta GLC19 1           | 0,18241557 |
| Felis nigripes NCO28309 1            | Canis latrans NCO08093 7              | 0,18241563 |
| Ommatophoca rossii AY377287etc 1     | Canis anthus NCO27956 2               | 0,18241706 |
| Ursus maritimus NCO03428 30 19       | Mustela itatsi NCO34330 19            | 0,18241791 |
| Viverricula indica NCO25296 2        | Procyon lotor AB462049 4              | 0,18241794 |
| Ursus arctos prunosus MGO66703 3     | Mustela nigripes NCO20494 1           | 0,18241826 |
| Martes martes T302 3                 | Leopardus tigrinus NCO28317 1         | 0,18241972 |
| Procyon lotor AB462046 3             | Otocolobus manul NCO28323 1           | 0,18242045 |
| Lutra lutra NCO11358 9               | Acinonyx jubatus NCO05212 3           | 0,18242183 |
| Profelis aurata NCO28299 1           | Bassariscus sumichrasti SRX1099089 1  | 0,18242733 |
| Prionailurus bengalensis CKM45 20    | Arctocepalus pusillus NCO08417 1      | 0,18242802 |
| Potos flavus T414 1                  | Acinonyx jubatus NCO05212 3           | 0,18242891 |
| Ursus thibetanus MH281753 2          | Bassariscus sumichrasti SRX1099089 1  | 0,18242976 |
| Mustela putorius NCO20638 4          | Halartocus malayanus NCO09968 2       | 0,18242979 |
| Gulo gulo NCO09685 3                 | Fossa fossana D350 1                  | 0,18243566 |
| Zalophus californianus NCO08416 1    | Ursus arctos isabellinus 18B5 2       | 0,18243623 |
| Crossarchus platycephalus C7R66 1    | Arctocepalus forsteri NCO40023 28     | 0,18243626 |
| Felis catus NCO01700 2               | Chrysocyon brachyurus NCO24172 1      | 0,18243709 |
| Profelis aurata NCO28299 1           | Lycalopex sechurae KY448284 1         | 0,18243839 |
| Ursus thibetanus laniger MH281753 2  | Leopardus geoffroyi NCO28320 1        | 0,18244006 |
| Viverricula indica KX891751 1        | Martes flavigula NCO12141 3           | 0,18244138 |
| Ursus americanus JX19636 3           | Arctocepalus australis MGO23139 1     | 0,18244319 |
| Zalophus californianus NCO08416 1    | Viverra zibetha T609 1                | 0,18244334 |
| Mephitis mephitis NCO20648 1         | Ictonyx striatus T299 1               | 0,18244452 |
| Ursus spelaeus NCO11112 8            | Arctictis binturong T605 2            | 0,18244818 |
| Gulo gulo NCO09685 3                 | Civettictis civetta GLC19 1           | 0,18244846 |
| Ursus thibetanus laniger MH281753 2  | Arctictis binturong T605 2            | 0,18244955 |
| Urus spelaeus NCO11112 8             | Arctocepalus forsteri NCO40023 28     | 0,18245155 |
| Profelis aurata NCO28299 1           | Canis lupus chanco NCO10340 4         | 0,18245256 |
| Nyctereutes procyonoides NCO13700 3  | Haliocercus grypus NCO01602 2         | 0,18245462 |
| Mephitis mephitis NCO20648 1         | Martes flavigula NCO12141 3           | 0,18245631 |
| Prionailurus viverrinus NCO28305 1   | Martes flavigula NCO12141 3           | 0,18245639 |
| Leopardus colocolo NCO28314 1        | Chrysocyon brachyurus NCO24172 1      | 0,18245743 |
| Lutra sumatrana NCO35810 1           | Crossarchus platycephalus C7R66 1     | 0,18245988 |
| Enhydra lutris NCO09692 1            | Crossarchus platycephalus C7R66 1     | 0,18246041 |
| Meles anakuma NCO09677 1             | Crossarchus platycephalus C7R66 1     | 0,18246113 |
| Nasua nasua NCO20647 1               | Melogale moschata V0735A 1            | 0,18246216 |
| Mustela sibirica NCO20637 6          | Chrotogale owstoni T607 1             | 0,1824629  |
| Mustela sibirica AP017394 11         | Chrotogale owstoni T607 1             | 0,18246296 |
| Viverra tangalunga MH464792 1        | Arctocepalus australis MGO23139 1     | 0,18246424 |
| Mustela kathiah NCO23210 1           | Mungos mungo MMC7 1                   | 0,18246476 |
| Mustela sibirica AP017394 11         | Arctocepalus gazella BK010918 1       | 0,18246488 |
| Mustela putorius NCO20638 4          | Arctocepalus gazella BK010918 1       | 0,18246534 |
| Mustela frenata NCO20640 1           | Urus brachyura KY117547 1             | 0,18246557 |
| Mustela nigripes NCO24942 1          | Arctocepalus gazella BK010918 1       | 0,18246561 |
| Mustela sibirica NCO20637 6          | Conepatus chinga NCO42596 1           | 0,18246619 |
| Crossarchus platycephalus C7R66 1    | Canis anthus NCO27956 2               | 0,18246722 |
| Ursus maritimus GU573488 Svalbard    | Eumetopias jubatus NCO04030 10        | 0,18246736 |
| Pusa sibirica NCO08432 2             | Canis anthus NCO27956 2               | 0,18246765 |
| Salanoia concolor D378 1             | Meles leucurus NCO39173 4             | 0,18246798 |
| Lutrogale perspicillata NCO35811 1   | Ailurus fulgens NCO11124 1            | 0,18246897 |
| Homotherium latidens MF871702 3      | Arctotherium sp NCO30174 1            | 0,18246937 |
| Martes martes T302 3                 | Urus semitorquata MH464789 1          | 0,18247019 |
| Viverricula indica KX891745 1        | Lutra sumatrana NCO35810 1            | 0,1824719  |
| Martes zibellina NCO11579 39         | Canis adustus K448271 1               | 0,1824737  |
| Pocilogale albinucha T602 1          | Arctocepalus australis MGO23139 1     | 0,18247506 |
| Ursus arctos EU497665 29             | Callorhinus ursinus NCO08415 1        | 0,18247525 |
| Viverra zibetha T609 1               | Conepatus chinga NCO42596 1           | 0,18247542 |
| Viverricula indica KX891745 1        | Mustela eversmanni NCO28013 1         | 0,18247664 |
| Vulpes lagopus NCO26529 3            | Viverra zibetha T609 1                | 0,18247679 |
| Viverricula indica KX891751 1        | Conepatus chinga NCO42596 1           | 0,18247731 |
| Martes melampus NCO09678 1           | Leopardus tigrinus NCO28317 1         | 0,18247767 |
| Viverra tangalunga MH464792 1        | Leopardus tigrinus NCO28317 1         | 0,18247767 |
| Meles anakuma NCO09677 1             | Catopuma badia NCO28300 1             | 0,18247774 |
| Viverra tangalunga MH464792 1        | Leopardus jacobita NCO28322 1         | 0,18247776 |
| Mustela kathiah NCO23210 1           | Felis nigripes NCO28309 1             | 0,18247782 |
| Leopardus jacobita NCO28322 1        | Callorhinus ursinus NCO08415 1        | 0,18247872 |
| Mustela nigripes NCO24942 1          | Civettictis civetta GLC19 1           | 0,18247867 |
| Prionailurus viverrinus NCO28305 1   | Mustela eversmanni NCO28013 1         | 0,18247955 |
| Martes zibellina NCO11579 39         | Lynx rufus NCO14456 3                 | 0,18247992 |
| Martes americana NCO20642 1          | Catopuma badia NCO28300 1             | 0,18248007 |
| Phoca vitulina NCO01325 1            | Nasua nasua NCO20647 1                | 0,18248023 |
| Tremarctos ornatus NCO09969 2        | Prionailurus viverrinus NCO28305 1    | 0,18248026 |
| Ursus arctos EU497665 29             | Meles leucurus NCO39173 4             | 0,1824809  |
| Paradoxurus hermaphroditus NLNC 1    | Canis anthus NCO27956 2               | 0,18248124 |
| Leopardus pardalis NCO28315 1        | Canis latrans NCO08093 7              | 0,18248148 |
| Lynx pardinus NCO28319 161           | Canis latrans NCO08093 7              | 0,18248218 |
| Mungotictis decemlineata NCO27828    | Martes foina NCO20643 1               | 0,18248278 |
| Ursus maritimus GU573488 Svalbard    | Martes americana NCO20642 1           | 0,18248306 |
| Viverricula indica KX891751 1        | Procyon lotor AB462046 3              | 0,18248358 |
| Parahaena brunnea NCO38159 15        | Mustela frenata NCO20640 1            | 0,18248373 |
| Lynx lynx NCO27083 4                 | Aonyx cinerea NCO35814 2              | 0,18248394 |
| Ursus arctos EU497665 29             | Arctocepalus pusillus NCO08417 1      | 0,18248442 |
| Ictonyx striatus T299 1              | Arctocepalus pusillus NCO08417 1      | 0,18248455 |
| Mustela kathiah NCO23210 1           | Lycyon pictus NCO28427 2              | 0,18248467 |
| Ursus maritimus NCO03428 31          | Mustela putorius NCO20638 4           | 0,18248481 |
| Ursus maritimus GU573488 Svalbard    | Mustela putorius NCO20638 4           | 0,18248489 |

|                                       |                                       |            |
|---------------------------------------|---------------------------------------|------------|
| Puma yagouaroundi NC028311 1          | Caracal caracal NC028306 1            | 0,09460005 |
| Puma concolor NC016470 22             | Leopardus wiedii NC028318 1           | 0,09460129 |
| Lynx canadensis NC028313 1            | Leopardus colocolo NC028314 1         | 0,09461269 |
| Lycan pictus NC028427 2               | Canis aureus KT448274 1               | 0,09461787 |
| Profelis aurata NC028299 1            | Lynx rufus NC014456 3                 | 0,09466738 |
| Leopardus pardalis T262 1             | Felis nigripes NC028309 1             | 0,09466834 |
| Prionailurus planiceps NC028312 6     | Leopardus wiedii NC028318 1           | 0,09466885 |
| Leopardus colocolo NC028314 1         | Felis chaus NC028307 1                | 0,09467871 |
| Lynx lynx NC027083 4                  | Leopardus colocolo NC028314 1         | 0,09468006 |
| Prionailurus viverrinus NC028305 1    | Leopardus jacobita NC028322 1         | 0,09472834 |
| Urva brachyura KY117547 1             | Attilax paludinosus T606 1            | 0,09473471 |
| Puma yagouaroundi NC028311 1          | Prionailurus viverrinus NC028305 1    | 0,09473661 |
| Lynx lynx NC027083 4                  | Leopardus jacobita NC028322 1         | 0,09473707 |
| Puma concolor NC016470 22             | Caracal caracal NC028306 1            | 0,09480204 |
| Profelis aurata NC028299 1            | Leopardus colocolo NC028314 1         | 0,09481375 |
| Ommatophoca rossii AY377287etc 1      | Mirounga leonina NC008422 1           | 0,09485417 |
| Prionailurus planiceps KY682741 4     | Leopardus wiedii NC028318 1           | 0,09487079 |
| Leopardus jacobita NC028322 1         | Catopuma badia NC028300 1             | 0,09493808 |
| Prionailurus viverrinus NC028305 1    | Leopardus colocolo NC028314 1         | 0,09494034 |
| Eumetopias jubatus NC004030 10        | Callorhinus ursinus NC008415 1        | 0,09505272 |
| Lynx pardinus NC028319 161            | Felis nigripes NC028309 1             | 0,09507137 |
| Profelis aurata NC028299 1            | Felis margarita NC028308 1            | 0,09507137 |
| Leopardus wiedii NC028318 1           | Felis chaus NC028307 1                | 0,09507187 |
| Leopardus pardalis NC028315 1         | Felis nigripes NC028309 1             | 0,09507215 |
| Lynx pardinus NC028319 161            | Leopardus geoffroyi NC028320 1        | 0,09507285 |
| Lynx rufus NC014456 3                 | Leopardus wiedii NC028318 1           | 0,09507309 |
| Prionailurus viverrinus NC028305 1    | Pardofelis marmorata NLN3 2           | 0,09507327 |
| Prionailurus viverrinus NC028305 1    | Leopardus wiedii NC028318 1           | 0,0951323  |
| Leopardus wiedii NC028318 1           | Felis silvestris lybica KP202275 4    | 0,09513995 |
| Monachus schauinslandi NC008421 1     | Hydrurga leptonyx NC008425 1          | 0,09514814 |
| Leopardus jacobita NC028322 1         | Felis silvestris lybica KP202275 4    | 0,09520745 |
| Pardofelis marmorata NLN3 2           | Acinonyx jubatus NC005212 3           | 0,09521503 |
| Pardofelis marmorata NLN3 2           | Leptailurus serval NC028316 1         | 0,09527336 |
| Leopardus pardalis T262 1             | Felis margarita NC028307 1            | 0,09527431 |
| Lynx lynx NC027083 4                  | Leopardus geoffroyi NC028320 1        | 0,09527432 |
| Leptailurus serval NC028316 1         | Leopardus jacobita NC028322 1         | 0,09527444 |
| Prionailurus bengalensis CKM45 20     | Leopardus guigna NC028321 1           | 0,09527881 |
| Mustela kathiah NC023210 1            | Mustela erminea T305 2                | 0,09530219 |
| Leptailurus serval NC028316 1         | Leopardus guigna NC028321 1           | 0,09534413 |
| Otocolobus manul NC028323 1           | Acinonyx jubatus NC005212 3           | 0,09541678 |
| Lynx rufus NC014456 3                 | Leopardus colocolo NC028314 1         | 0,09541902 |
| Leopardus wiedii NC028318 1           | Felis nigripes NC028309 1             | 0,0954763  |
| Leopardus pardalis T262 1             | Catopuma temminckii NC027115 41       | 0,09547643 |
| Lynx canadensis NC028313 1            | Leopardus jacobita NC028322 1         | 0,09547763 |
| Prionailurus bengalensis CKM45 20     | Leopardus geoffroyi NC028320 1        | 0,09548037 |
| Prionailurus viverrinus NC028305 1    | Acinonyx jubatus NC005212 3           | 0,09548614 |
| Prionailurus bengalensis CKM45 20     | Leopardus tigrinus NC028317 1         | 0,09554644 |
| Urva javanica/auripunctata NC006835 1 | Bdeogale nigripes GLC15 1             | 0,09557028 |
| Catopuma temminckii NC027115 41       | Caracal caracal NC028306 1            | 0,09561002 |
| Otocolobus manul NC028323 1           | Lynx canadensis NC028313 1            | 0,09561002 |
| Otocolobus manul NC028323 1           | Leopardus jacobita NC028322 1         | 0,09561086 |
| Lynx lynx NC027083 4                  | Felis nigripes NC028309 1             | 0,09574468 |
| Urva javanica T413 1                  | Attilax paludinosus T606 1            | 0,09574468 |
| Leopardus pardalis T262 1             | Felis catus NC001700 2                | 0,0957458  |
| Felis silvestris lybica KP202275 4    | Acinonyx jubatus NC005212 3           | 0,09575397 |
| Leopardus colocolo NC028314 1         | Catopuma temminckii NC027115 41       | 0,09575728 |
| Lycan pictus NC028427 2               | Canis latrans NC008093 7              | 0,09580901 |
| Urva brachyura KY117547 1             | Cynictis penicillata T375 1           | 0,09581202 |
| Leopardus jacobita NC028322 1         | Felis chaus NC028307 1                | 0,09581263 |
| Leopardus pardalis NC028315 1         | Catopuma temminckii NC027115 41       | 0,09581303 |
| Leptailurus serval NC028316 1         | Leopardus tigrinus NC028317 1         | 0,09588033 |
| Lynx lynx NC027083 4                  | Leopardus tigrinus NC028317 1         | 0,09588175 |
| Pardofelis marmorata NLN3 2           | Leopardus pardalis T262 1             | 0,09594809 |
| Puma concolor NC016470 22             | Leopardus colocolo NC028314 1         | 0,09595991 |
| Lynx pardinus NC028319 161            | Leopardus jacobita NC028322 1         | 0,09601603 |
| Prionailurus planiceps NC028312 6     | Leopardus guigna NC028321 1           | 0,09601646 |
| Felis nigripes NC028309 1             | Caracal caracal NC028306 1            | 0,09608134 |
| Lynx canadensis NC028313 1            | Leopardus geoffroyi NC028320 1        | 0,09608249 |
| Lynx rufus NC014456 3                 | Leopardus guigna NC028321 1           | 0,09608229 |
| Otocolobus manul NC028323 1           | Lynx lynx NC027083 4                  | 0,09614867 |
| Otocolobus manul NC028323 1           | Lynx rufus NC014456 3                 | 0,09614867 |
| Leopardus jacobita NC028322 1         | Felis margarita NC028308 1            | 0,09614987 |
| Ommatophoca rossii AY377287etc 1      | Mirounga angustirostris SRR10331586 1 | 0,09616695 |
| Lynx canadensis NC028313 1            | Caracal caracal NC028306 1            | 0,096216   |
| Mungos mungo M7C 1                    | Crossarchus platycephalus C7R66 1     | 0,09621926 |
| Urva brachyura KY117547 1             | Bdeogale nigripes GLC15 1             | 0,09628333 |
| Leopardus colocolo NC028314 1         | Felis margarita NC028308 1            | 0,09629553 |
| Pardofelis marmorata NLN3 2           | Felis silvestris lybica KP202275 4    | 0,09635066 |
| Leopardus wiedii NC028318 1           | Felis margarita NC028308 1            | 0,09635166 |
| Prionailurus planiceps KY682741 4     | Leopardus geoffroyi NC028320 1        | 0,09635298 |
| Leopardus guigna NC028321 1           | Felis chaus NC028307 1                | 0,09635396 |
| Ichneumia albicauda T603 1            | Urva javanica T413 1                  | 0,09642597 |
| Profelis aurata NC028299 1            | Acinonyx jubatus NC005212 3           | 0,09642658 |
| Prionailurus planiceps NC028312 6     | Leopardus geoffroyi NC028320 1        | 0,09648761 |
| Leptailurus serval NC028316 1         | Leopardus geoffroyi NC028320 1        | 0,09648872 |
| Urva javanica T413 1                  | Bdeogale nigripes GLC15 1             | 0,09655266 |
| Leopardus jacobita NC028322 1         | Felis catus NC001700 2                | 0,09655396 |
| Lynx canadensis NC028313 1            | Leopardus tigrinus NC028317 1         | 0,09655495 |
| Felis chaus NC028307 1                | Acinonyx jubatus NC005212 3           | 0,09656108 |
| Leopardus geoffroyi NC028320 1        | Felis silvestris lybica KP202275 4    | 0,09662228 |
| Leopardus colocolo NC028314 1         | Felis catus NC001700 2                | 0,09663232 |
| Leopardus wiedii NC028318 1           | Catopuma temminckii NC027115 41       | 0,09668843 |
| Prionailurus planiceps KY682741 4     | Leopardus guigna NC028321 1           | 0,09668979 |
| Urva javanica/auripunctata NC006835 1 | Galerella sanguinea T378 1            | 0,09672454 |
| Leopardus wiedii NC028318 1           | Felis catus NC001700 2                | 0,0967558  |
| Lynx rufus NC014456 3                 | Leopardus tigrinus NC028317 1         | 0,09682401 |
| Leopardus jacobita NC028322 1         | Catopuma temminckii NC027115 41       | 0,09689055 |
| Leopardus tigrinus NC028317 1         | Catopuma badia NC028300 1             | 0,09689064 |
| Puma concolor NC016470 22             | Leopardus guigna NC028321 1           | 0,09689175 |
| Leopardus guigna NC028321 1           | Felis silvestris lybica KP202275 4    | 0,09689177 |
| Leopardus geoffroyi NC028320 1        | Felis chaus NC028307 1                | 0,09695985 |
| Lycan pictus NC028427 2               | Canis lupus chanco NC010340 4         | 0,09697928 |
| Lynx pardinus NC028319 161            | Caracal caracal NC028306 1            | 0,09702397 |

|                                      |                                      |            |
|--------------------------------------|--------------------------------------|------------|
| Ursus arctos EU497665 29             | Mustela nigripes NC024942 1          | 0,18248555 |
| Zalophus wolfebaeki SRR4431565 1     | Crossarchus platycephalus C7R66 1    | 0,18248627 |
| Ursus thibetanus mupinensis NC00875  | Canis adustus KT448271 1             | 0,18248646 |
| Prionailurus rubiginosus NC028304 2  | Martes pennanti NC020664 16          | 0,18248665 |
| Prionailurus viverrinus NC028305 1   | Mustela altaica NC021751 1           | 0,18248679 |
| Ursus arctos isabellinus 1885 2      | Genetta servalina NC024568 2         | 0,18248689 |
| Melogale moschata NC020644 1         | Leptailurus serval NC028316 1        | 0,18248741 |
| Panthera onca NC022842 1             | Mustela frenata NC020640 1           | 0,18248895 |
| Phoca groenlandica NC008429 54       | Hyaena hyaena NC020669 1             | 0,18248987 |
| Melursus ursinus NC009970 2          | Arctocepalus forsteri KT693377 17    | 0,18249035 |
| Ursus arctos GU573486 5              | Mustela itatsi NC034330 19           | 0,18249153 |
| Neovison vison NC020641 3            | Catopuma temminckii NC027115 41      | 0,18249446 |
| Ursus spelaeus NC011112 8            | Lutra sumatrana NC035810 1           | 0,18249555 |
| Ursus thibetanus thibetanus NC011118 | Neophoca cinerea NC008419 1          | 0,18249561 |
| Ictonyx striatus T299 1              | Catopuma badia NC028300 1            | 0,18249567 |
| Zalophus calliformianus NC008416 1   | Mungos mungo/gambianus SRR77048      | 0,18249807 |
| Viverra zibetha T609 1               | Ursus thibetanus laniger MH281753 2  | 0,18250069 |
| Neovison vison NC020641 3            | Canis mesomelas KT448280 1           | 0,18250266 |
| Paguma larvata PDD511 2              | Mephitis mephitis NC020648 1         | 0,18250544 |
| Ursus spelaeus NC011112 8            | Puma yagouaroundi NC028311 1         | 0,18250866 |
| Ursus thibetanus laniger MH281753 2  | Arctocepalus forsteri NC004023 28    | 0,18250933 |
| Ursus thibetanus formosanus NC00933  | Arctictis binturong T605 2           | 0,18251316 |
| Vulpes vulpes NC008434 5             | Smilodon populator MF871700 1        | 0,1825134  |
| Profelis aurata NC028299 1           | Canis lupus familiaris NC002008 1231 | 0,18251553 |
| Lycalopex sechurae KT448284 1        | Acinonyx jubatus NC005212 3          | 0,18251613 |
| Mustela eversmannii NC028013 1       | Civettictis civetta NC033378 1       | 0,1825175  |
| Monachus monachus NC044972 5         | Galidia elegans D146 1               | 0,18251766 |
| Helarctos malayanus NC009968 2       | Arctictis binturong T605 2           | 0,18251859 |
| Prionailurus planiceps KY682741 4    | Gulo gulo NC009685 3                 | 0,18251975 |
| Panthera tigris NC010642 35          | Monachus monachus NC044972 5         | 0,18252075 |
| Leopardus geoffroyi NC028320 1       | Gulo gulo NC009685 3                 | 0,18252137 |
| Viverra zibetha T609 1               | Cuon alpinus NC013445 3              | 0,18252137 |
| Paradoxurus jerdoni MH464793 1       | Cuon alpinus NC013445 3              | 0,18252525 |
| Ursus thibetanus mupinensis NC00875  | Civettictis civetta NC033378 1       | 0,18252623 |
| Leopardus wiedii NC028318 1          | Eumetopias jubatus NC004030 10       | 0,18252712 |
| Meles anakuma NC009677 1             | Arctocepalus townsendi NC008420 1    | 0,18252726 |
| Smilodon populator MF871700 1        | Mustela nigripes NC024942 1          | 0,18252847 |
| Meles meles T303 3                   | Eupleres goudotii D128 1             | 0,18252926 |
| Prionailurus bengalensis NC028301 12 | Cuon alpinus NC013445 3              | 0,1825303  |
| Ommatophoca rossii AY377287etc 1     | Urva brachyura KY117547 1            | 0,18253075 |
| Melogale moschata KP72673 1          | Eupleres goudotii D128 1             | 0,18253112 |
| Viverricula indica KX891745 1        | Lutra lutra NC01358 9                | 0,18253158 |
| Neophoca cinerea NC008419 1          | Mustela putorius NC020638 4          | 0,18253447 |
| Potos flavus T414 1                  | Attilax paludinosus T606 1           | 0,18253559 |
| Martes pennanti NC020664 16          | Arctocepalus townsendi NC008420 1    | 0,18253767 |
| Viverra zibetha T609 1               | Callorhinus ursinus NC008415 1       | 0,18253891 |
| Enhydra lutris NC009692 1            | Arctotherium sp NC030174 1           | 0,18254046 |
| Lynx rufus NC014456 3                | Lutra lutra NC01358 9                | 0,18254155 |
| Ursus arctos GU573491 207            | Taxidea taxus NC020646 1             | 0,18254164 |
| Mustela marmalis T306 5              | Fossa fossana D350 1                 | 0,18254189 |
| Melogale moschata V0735A 1           | Genetta servalina NC024568 2         | 0,18254246 |
| Mustela altaica NC021751 1           | Mungos mungo M7C 1                   | 0,18254253 |
| Meles anakuma NC009677 1             | Felis nigripes NC028309 1            | 0,18254273 |
| Profelis aurata NC028299 1           | Meles leucurus NC039173 4            | 0,18254308 |
| Tremarctos ornatus NC009969 2        | Mustela nivalis T306 5               | 0,18254457 |
| Taxidea taxus NC020646 1             | Profelis aurata NC028299 1           | 0,18254519 |
| Meles anakuma NC009677 1             | Leopardus guigna NC028321 1          | 0,18254553 |
| Mustela sibirica NC020637 6          | Felis catus NC001700 2               | 0,18254599 |
| Mustela sibirica NC020637 6          | Felis nigripes NC028309 1            | 0,18254612 |
| Zalophus wolfebaeki SRR4431565 1     | Melogale moschata KP72673 1          | 0,18254772 |
| Mustela kathiah NC023210 1           | Catopuma temminckii NC027115 41      | 0,18254907 |
| Zalophus wolfebaeki SRR4431565 1     | Genetta abyssinica MG489822 1        | 0,1825491  |
| Leopardus tigrinus NC028317 1        | Canis latrans NC008093 7             | 0,18254918 |
| Martes zibellina NC011579 39         | Leopardus wiedii NC028318 1          | 0,18254931 |
| Felis silvestris lybica KP202275 4   | Canis anthus NC027956 2              | 0,18254951 |
| Martes zibellina NC011579 39         | Leopardus geoffroyi NC028320 1       | 0,18254972 |
| Felis catus NC001700 2               | Canis latrans NC008093 7             | 0,18254974 |
| Ursus arctos EU497665 29             | Ailurus fulgens NC011124 1           | 0,18255013 |
| Vulpes vulpes NC008434 5             | Mirounga angustirostris SRR10331586  | 0,18255024 |
| Ursus arctos GU573491 207            | Ailurus fulgens NC011124 1           | 0,18255031 |
| Lynx pardinus NC028319 161           | Arctocepalus pusillus NC008417 1     | 0,18255176 |
| Phoca fasciata NC008428 1            | Otocyon megalotis SAF1 2             | 0,18255188 |
| Ursus spelaeus NC011112 8            | Canis adustus KT448271 1             | 0,18255351 |
| Procyon lotor AB462049 4             | Felis chaus NC028307 1               | 0,18255378 |
| Felis catus NC001700 2               | Canis aureus KT448274 1              | 0,18255389 |
| Melogale moschata NC020644 1         | Felis margarita NC028308 1           | 0,18255548 |
| Genetta abyssinica MG489822 1        | Enhydra lutris NC009692 1            | 0,18255518 |
| Pardofelis marmorata NLN3 2          | Martes martes T303 2                 | 0,18255591 |
| Felis nigripes NC028309 1            | Bassariscus sumichrasti SRX1099089 1 | 0,18255706 |
| Ursus thibetanus thibetanus NC011118 | Lutra lutra LC050126 1               | 0,18255751 |
| Phoca vitulina NC001325 1            | Otocyon megalotis SAF1 2             | 0,18255776 |
| Poecilogale albinucha T602 1         | Leopardus geoffroyi NC028320 1       | 0,18255854 |
| Ailurus fulgens styani NC009691 1    | Acinonyx jubatus NC005212 3          | 0,18255895 |
| Zalophus wolfebaeki SRR4431565 1     | Poecilogale albinucha T602 1         | 0,18256092 |
| Ictonyx striatus T299 1              | Felis silvestris lybica KP202275 4   | 0,18256168 |
| Ursus spelaeus NC011112 8            | Fossa fossana D350 1                 | 0,18256562 |
| Lycan pictus NC028427 2              | Felis chaus NC028307 1               | 0,18256536 |
| Canis latrans NC008093 7             | Acinonyx jubatus NC005212 3          | 0,18256575 |
| Martes melampus NC009678 1           | Canis lupus chanco NC010340 4        | 0,18256746 |
| Viverricula indica KX891751 1        | Ursus spelaeus NC011112 8            | 0,18256769 |
| Ursus spelaeus NC011112 8            | Civettictis civetta GLC19 1          | 0,18256772 |
| Viverricula indica KX891745 1        | Ursus spelaeus NC011112 8            | 0,18256782 |
| Zalophus wolfebaeki SRR4431565 1     | Homotherium latidens MF871702 3      | 0,18257047 |
| Ursus thibetanus laniger MH281753 2  | Leopardus wiedii NC028318 1          | 0,1825708  |
| Zalophus calliformianus NC008416 1   | Ursus arctos GU573491 207            | 0,18257082 |
| Ursus thibetanus laniger MH281753 2  | Felis chaus NC028307 1               | 0,18257217 |
| Leopardus pardalis T262 1            | Canis lupus chanco NC010340 4        | 0,18257399 |
| Taxidea taxus NC020646 1             | Canis lupus familiaris NC002008 1231 | 0,18257563 |
| Ursus thibetanus thibetanus NC011118 | Catopuma badia NC028300 1            | 0,18257613 |
| Zalophus calliformianus NC008416 1   | Lynx pardinus NC028319 161           | 0,18257695 |
| Leopardus tigrinus NC028317 1        | Canis lupus familiaris NC002008 1231 | 0,1825802  |
| Lynx pardinus NC028319 161           | Canis lupus chanco NC010340 4        | 0,18258397 |
| Leopardus pardalis NC028315 1        | Gulo gulo NC009685 3                 | 0,18258633 |

|                                      |                                      |            |
|--------------------------------------|--------------------------------------|------------|
| Leopardus guigna NC028321 1          | Catopuma temminckii NC027115 41      | 0,09702678 |
| Leopardus colocolo NC028314 1        | Felis nigripes NC028309 1            | 0,09703608 |
| Urus brachyura KY117547 1            | Galerella sanguinea T378 1           | 0,09709843 |
| Profelis aurata NC028299 1           | Lynx pardinus NC028319 161           | 0,09715863 |
| Leopardus tigrinus NC028317 1        | Felis silvestris lybica KP202275 4   | 0,09715997 |
| Felis catus NC001700 2               | Acinonyx jubatus NC005212 3          | 0,09716795 |
| Leopardus jacobita NC028322 1        | Felis nigripes NC028309 1            | 0,09729457 |
| Leopardus geoffroyi NC028320 1       | Felis margarita NC028308 1           | 0,0972957  |
| Leopardus guigna NC028321 1          | Felis margarita NC028308 1           | 0,09729588 |
| Caracal caracal NC028306 1           | Acinonyx jubatus NC005212 3          | 0,09730216 |
| Leopardus tigrinus NC028317 1        | Felis chaus NC028307 1               | 0,09736114 |
| Martes melampus NC009678 1           | Martes flavigula NC012141 3          | 0,09748234 |
| Pardofelis marmorata NLN3 2          | Leopardus pardalis NC028315 1        | 0,09749668 |
| Lynx pardinus NC028319 161           | Leopardus tigrinus NC028317 1        | 0,0974974  |
| Leopardus jacobita NC028322 1        | Acinonyx jubatus NC005212 3          | 0,0975062  |
| Puma yagouaroundi NC028311 1         | Leopardus colocolo NC028314 1        | 0,09750777 |
| Leopardus tigrinus NC028317 1        | Catopuma temminckii NC027115 41      | 0,09756381 |
| Leopardus guigna NC028320 1          | Felis catus NC001700 2               | 0,09756496 |
| Callorhinus ursinus NC008415 1       | Arctocepalus townsendi NC008420 1    | 0,0975812  |
| Callorhinus ursinus NC008415 1       | Arctocepalus australis MG023139 1    | 0,09758128 |
| Cuon alpinus NC013445 3              | Canis adustus KT448271 1             | 0,09758973 |
| Lynx rufus NC014456 3                | Leopardus geoffroyi NC028320 1       | 0,09763146 |
| Lycan pictus NC028427 2              | Canis lupus familiaris NC002008 1231 | 0,0976458  |
| Lynx lynx NC027083 4                 | Caracal caracal NC028306 1           | 0,09769728 |
| Profelis aurata NC028299 1           | Lynx canadensis NC028313 1           | 0,09769728 |
| Profelis aurata NC028299 1           | Leopardus wiedii NC028318 1          | 0,09769782 |
| Puma yagouaroundi NC028311 1         | Leopardus wiedii NC028318 1          | 0,09769815 |
| Leopardus pardalis NC028315 1        | Acinonyx jubatus NC005212 3          | 0,09770803 |
| Prionailurus viverrinus NC028305 1   | Leopardus guigna NC028321 1          | 0,09775803 |
| Leopardus guigna NC028321 1          | Felis nigripes NC028309 1            | 0,09776705 |
| Leopardus guigna NC028321 1          | Felis catus NC001700 2               | 0,0977671  |
| Poecilogle albinocha T602 1          | Ictonyx striatus T299 1              | 0,09780671 |
| Pardofelis marmorata NLN3 2          | Felis catus NC001700 2               | 0,09783194 |
| Profelis aurata NC028299 1           | Leopardus pardalis T262 1            | 0,09783247 |
| Puma yagouaroundi NC028311 1         | Leopardus pardalis T262 1            | 0,09783287 |
| Puma concolor NC016470 22            | Leopardus geoffroyi NC028320 1       | 0,09783432 |
| Felis margarita NC028308 1           | Acinonyx jubatus NC005212 3          | 0,09784111 |
| Martes martes T302 3                 | Martes flavigula NC012141 3          | 0,09789252 |
| Prionailurus viverrinus NC028305 1   | Leopardus geoffroyi NC028320 1       | 0,09789268 |
| Profelis aurata NC028299 1           | Lynx lynx NC027083 4                 | 0,09789927 |
| Puma yagouaroundi NC028311 1         | Leopardus jacobita NC028322 1        | 0,09790031 |
| Leopardus wiedii NC028318 1          | Acinonyx jubatus NC005212 3          | 0,09790977 |
| Profelis aurata NC028299 1           | Pardofelis marmorata NLN3 2          | 0,0979666  |
| Leopardus pardalis T262 1            | Caracal caracal NC028306 1           | 0,09796734 |
| Leopardus geoffroyi NC028320 1       | Catopuma temminckii NC027115 41      | 0,09796939 |
| Felis nigripes NC028309 1            | Acinonyx jubatus NC005212 3          | 0,09797562 |
| Vulpes zerda KJ603240 1              | Vulpes vulpes NC008434 5             | 0,09802733 |
| Prionailurus planiceps NC028312 6    | Leopardus tigrinus NC028317 1        | 0,0980356  |
| Leopardus colocolo NC028314 1        | Caracal caracal NC028306 1           | 0,09804616 |
| Profelis aurata NC028299 1           | Leopardus jacobita NC028322 1        | 0,09810183 |
| Leopardus tigrinus NC028317 1        | Felis catus NC001700 2               | 0,09810252 |
| Pardofelis marmorata NLN3 2          | Leopardus wiedii NC028318 1          | 0,09810285 |
| Callorhinus ursinus NC008415 1       | Arctocepalus pusillus NC008417 1     | 0,09812235 |
| Profelis aurata NC028299 1           | Leopardus pardalis NC028315 1        | 0,098169   |
| Leopardus guigna NC028321 1          | Catopuma badia NC028300 1            | 0,09817158 |
| Pardofelis marmorata NLN3 2          | Felis margarita NC028308 1           | 0,09823593 |
| Lutra sumatrana NC035810 1           | Aonyx cinerea NC035814 2             | 0,09825695 |
| Leopardus pardalis NC028315 1        | Caracal caracal NC028306 1           | 0,09830397 |
| Puma yagouaroundi NC028311 1         | Leopardus pardalis NC028315 1        | 0,09830415 |
| Puma concolor NC016470 22            | Leopardus tigrinus NC028317 1        | 0,09830461 |
| Callorhinus ursinus NC008415 1       | Arctocepalus forsteri KT693377 17    | 0,09838884 |
| Martes zibellina NC011579 39         | Martes flavigula NC012141 3          | 0,09842528 |
| Leopardus wiedii NC028318 1          | Caracal caracal NC028306 1           | 0,09843876 |
| Leopardus tigrinus NC028317 1        | Felis margarita NC028308 1           | 0,09843904 |
| Leopardus pardalis T262 1            | Acinonyx jubatus NC005212 3          | 0,09844881 |
| Pardofelis marmorata NLN3 2          | Felis chaus NC028307 1               | 0,09857258 |
| Prionailurus planiceps KY682741 4    | Leopardus tigrinus NC028317 1        | 0,09857461 |
| Lycan pictus NC028427 2              | Canis anthus NC027956 2              | 0,09863668 |
| Lynx rufus NC014456 3                | Caracal caracal NC028306 1           | 0,09863991 |
| Pusa hispida NC 008433 1             | Erigonathus barbatus NC008426 1      | 0,09864585 |
| Prionailurus viverrinus NC028305 1   | Leopardus tigrinus NC028317 1        | 0,0987006  |
| Pardofelis marmorata NLN3 2          | Leopardus colocolo NC028314 1        | 0,09878714 |
| Pardofelis marmorata NLN3 2          | Leopardus jacobita NC028322 1        | 0,09884363 |
| Lycan pictus NC028427 2              | Canis adustus KT448271 1             | 0,0988751  |
| Leopardus geoffroyi NC028320 1       | Catopuma badia NC028300 1            | 0,09891215 |
| Callorhinus ursinus NC008415 1       | Arctocepalus gazella BK010918 1      | 0,09892737 |
| Monachus monachus NC044972 5         | Mirounga leonina NC008422 1          | 0,09893482 |
| Pardofelis marmorata NLN3 2          | Felis nigripes NC028309 1            | 0,09897657 |
| Martes flavigula NC012141 3          | Martes americana NC020642 1          | 0,09903072 |
| Leopardus geoffroyi NC028320 1       | Felis nigripes NC028309 1            | 0,09918103 |
| Otocolobus manul NC028323 1          | Leopardus geoffroyi NC028320 1       | 0,09918181 |
| Phoca fasciata NC008428 1            | Erigonathus barbatus NC008426 1      | 0,09918231 |
| Pardofelis marmorata NLN3 2          | Otocolobus manul NC028323 1          | 0,09924589 |
| Urus javanicus T413 1                | Galerella sanguinea T378 1           | 0,09925439 |
| Puma yagouaroundi NC028311 1         | Leopardus guigna NC028321 1          | 0,09931631 |
| Lutra lutra LC050126 1               | Aonyx cinerea NC035814 2             | 0,09940103 |
| Lutra lutra NC011358 9               | Aonyx cinerea NC035814 2             | 0,09940103 |
| Leopardus colocolo NC028314 1        | Acinonyx jubatus NC005212 3          | 0,09940334 |
| Pusa sibirica NC008432 2             | Erigonathus barbatus NC008426 1      | 0,09944788 |
| Monachus schauinslandi NC008421 1    | Monachus monachus NC044972 5         | 0,09947958 |
| Pardofelis marmorata NLN3 2          | Caracal caracal NC028306 1           | 0,09951521 |
| Otocolobus manul NC028323 1          | Leopardus guigna NC028321 1          | 0,09951856 |
| Lutrogale perspicillata NC035811 1   | Lutra sumatrana NC035810 1           | 0,09967002 |
| Vulpes zerda KJ603240 1              | Vulpes corsac NC023958 1             | 0,09971049 |
| Leopardus jacobita NC028322 1        | Caracal caracal NC028306 1           | 0,09971819 |
| Mungos mungo/gambianus SRR7704821 1  | Crossarchus platycephalus C7R66 1    | 0,09978454 |
| Callorhinus ursinus NC008415 1       | Arctocepalus forsteri NC004023 28    | 0,09983991 |
| Lycan pictus NC028427 2              | Canis mesomelas KT448280 1           | 0,09997846 |
| Vulpes zerda KJ603240 1              | Vulpes ferrillata NC027935 1         | 0,10011446 |
| Panthera onca NC022842 1             | Neofelis nebulosa NC008450 3         | 0,10014136 |
| Puma yagouaroundi NC028311 1         | Leopardus tigrinus NC028317 1        | 0,10018902 |
| Lycalopex securae KT448284 1         | Canis aureus KT448274 1              | 0,10029629 |
| Leptonyx chotes weddellii NC008424 1 | Erigonathus barbatus NC008426 1      | 0,10039052 |

|                                      |                                      |            |
|--------------------------------------|--------------------------------------|------------|
| Leopardus jacobita NC028322 1        | Gulo gulo NC009685 3                 | 0,18258667 |
| Panthera pardus NC010641 5           | Ommatophoca rossii AY377287etc 1     | 0,18258736 |
| Paradoxurus jerdoni MH464793 1       | Halichoerus grypus NC001602 2        | 0,18258961 |
| Lynx lynx NC027083 4                 | Eumetopias jubatus NC004030 10       | 0,1825927  |
| Lutra lutra LC050126 1               | Crossarchus platycephalus C7R66 1    | 0,18259364 |
| Tremarctos ornatus NC009969 2        | Hemigalus derbyanus MH464791 1       | 0,18259607 |
| Mustela nigripes NC024942 1          | Arctocepalus townsendi NC008420 1    | 0,18259867 |
| Melogale moschata KP726273 1         | Arctocepalus australis MG023139 1    | 0,1825992  |
| Salanoia concolor D378 1             | Lutra lutra LC050126 1               | 0,18260066 |
| Salanoia concolor D378 1             | Melogale moschata V0735A 1           | 0,18260212 |
| Procyon lotor AB462046 3             | Chrotogale owstoni T607 1            | 0,18260217 |
| Suricata suricatta SSM10 1           | Mustela erminea T305 2               | 0,18260224 |
| Tremarctos ornatus NC009969 2        | Ailurus fulgens styani NC009691 1    | 0,18260336 |
| Genetta abyssinica MG489822 1        | Conepatus chinga NC042596 1          | 0,18260346 |
| Ursus thibetanus thibetanus NC011118 | Civettictis civetta NC033378 1       | 0,1826048  |
| Ursus thibetanus thibetanus NC011118 | Homotherium thibetanus NC011118      | 0,18260612 |
| Ursus thibetanus laniger MH281753 2  | Canis adustus KT448271 1             | 0,18260621 |
| Tremarctos ornatus NC009969 2        | Procyon lotor AB462046 3             | 0,18260624 |
| Lutra lutra NC011358 9               | Catopuma badia NC028300 1            | 0,18260637 |
| Canis lupus chanco NC010340 4        | Acinonyx jubatus NC005212 3          | 0,18260679 |
| Mustela sibirica AP017394 11         | Canis anthus NC027956 2              | 0,18260691 |
| Mustela itatzi NC034330 19           | Canis latrans NC008093 7             | 0,18260761 |
| Otocolobus manul NC028323 1          | Lutra lutra LC050126 1               | 0,18260761 |
| Mungotictis decemlineata NC027828    | Martes martes T302 3                 | 0,18260968 |
| Melogale moschata KP726273 1         | Civettictis civetta GLC19 1          | 0,18261042 |
| Ursus thibetanus thibetanus NC011118 | Smilodon populator MF871700 1        | 0,18261074 |
| Felis margarita NC028308 1           | Ailurus fulgens NC011124 1           | 0,18261082 |
| Ursus thibetanus formosanus NC0093   | Smilodon populator MF871700 1        | 0,18261106 |
| Mustela eversmanni NC028013 1        | Leopardus jacobita NC028322 1        | 0,18261309 |
| Tremarctos ornatus NC009969 2        | Lynx rufus NC014456 3                | 0,18261331 |
| Prionodon pardicolor NC024569 2      | Meles meles T303 3                   | 0,1826134  |
| Paradoxurus jerdoni MH464793 1       | Mustela altaica NC021751 1           | 0,18261355 |
| Lutra sumatrana NC035810 1           | Leopardus guigna NC028321 1          | 0,18261366 |
| Civettictis civetta GLC19 1          | Ailurus fulgens NC011124 1           | 0,18261372 |
| Potos flavus T414 1                  | Felis silvestris lybica KP202275 4   | 0,18261379 |
| Genetta servalina NC024568 2         | Ailurus fulgens NC011124 1           | 0,1826138  |
| Paguma larvata PDD511 2              | Melogale moschata NC020644 1         | 0,18261452 |
| Prionailurus bengalensis CKM45 20    | Callorhinus ursinus NC008415 1       | 0,18261483 |
| Vulpes lagopus NC026529 3            | Leopardus wiedii NC028318 1          | 0,18261498 |
| Mustela eversmanni NC028013 1        | Catopuma badia NC028300 1            | 0,18261534 |
| Melogale moschata KP726273 1         | Catopuma temminckii NC027115 41      | 0,18261538 |
| Mustela sibirica NC020637 6          | Leopardus guigna NC028321 1          | 0,18261559 |
| Vulpes zerda KJ603240 1              | Leopardus pardalis NC028315 1        | 0,1826161  |
| Zalophus wolfebaeki SRR4431565 1     | Potos flavus T414 1                  | 0,18261641 |
| Martes zibellina NC011579 39         | Leopardus guigna NC028321 1          | 0,18261707 |
| Ursus arctos isabellinus 1885 2      | Ailurus fulgens styani NC009691 1    | 0,18261799 |
| Procyon lotor AB462046 3             | Genetta servalina NC024568 2         | 0,18261828 |
| Mustela sibirica NC020637 6          | Canis aureus KT448274 1              | 0,18261933 |
| Ursus arctos EU497665 29             | Mustela eversmanni NC028013 1        | 0,18261951 |
| Ursus thibetanus mupinensis NC00875  | Bassariscus sumichrasti SRX1099089 1 | 0,18262248 |
| Ursus thibetanus laniger MH281753 2  | Martes zibellina NC011579 39         | 0,18262312 |
| Otocyon megalotis SAF 1 2            | Mirounga angustirostris SRR10331586  | 0,18262325 |
| Poecilogle albinocha T602 1          | Lynx pardinus NC028319 161           | 0,18262348 |
| Felis silvestris lybica KP202275 4   | Bassariscus sumichrasti SRX1099089 1 | 0,18262373 |
| Profelis aurata NC028299 1           | Canis aureus KT448274 1              | 0,18262509 |
| Ursus spelaeus EU327344 13           | Martes pennanti NC020664 16          | 0,18262509 |
| Martes martes NC020643 1             | Ichneumia albicauda T603 1           | 0,18262511 |
| Viverra tangalunga MH464792 1        | Arctocepalus forsteri NC004023 28    | 0,18262555 |
| Puma yagouaroundi NC028311 1         | Arctodus simus NC011116 1            | 0,18262565 |
| Ursus thibetanus thibetanus NC011118 | Melogale moschata V0735A 1           | 0,18262567 |
| Lynx canadensis NC028313 1           | Ictonyx striatus T299 1              | 0,18262675 |
| Mirounga angustirostris SRR10331586  | Hyena hyaena NC020669 1              | 0,18262705 |
| Lycan pictus NC028427 2              | Leopardus pardalis T262 1            | 0,18262771 |
| Ursus spelaeus NC011112 8            | Arctocepalus forsteri KT693377 17    | 0,18262972 |
| Ursus thibetanus mupinensis NC00875  | Caracal caracal NC028306 1           | 0,18262985 |
| Ursus thibetanus formosanus NC0093   | Genetta servalina NC024568 2         | 0,18263279 |
| Ursus thibetanus formosanus NC0093   | Leopardus pardalis NC028315 1        | 0,18263704 |
| Ursus spelaeus EU327344 13           | Arctocepalus pusillus NC008417 1     | 0,18263739 |
| Ictonyx striatus T299 1              | Genetta abyssinica MG489822 1        | 0,18263792 |
| Procyon lotor AB462049 4             | Mephitis mephitis NC020648 1         | 0,18263876 |
| Leopardus tigrinus NC028317 1        | Canis aureus KT448274 1              | 0,18263912 |
| Paradoxurus hermaphroditus NC03959   | Canis lupus chanco NC010340 4        | 0,18264587 |
| Zalophus californianus NC008416 1    | Leopardus geoffroyi NC028320 1       | 0,18264821 |
| Leopardus geoffroyi NC028320 1       | Canis lupus familiaris NC002008 1231 | 0,18265268 |
| Smilodon populator MF871700 1        | Mustela sibirica NC020637 6          | 0,18265955 |
| Meles anakuma NC009677 1             | Arctocepalus forsteri KT693377 17    | 0,1826628  |
| Taxidea taxus NC020646 1             | Prionodon linsang ERR2391707 1       | 0,18266524 |
| Melogale moschata KP726273 1         | Chrotogale owstoni T607 1            | 0,18266664 |
| Neophoca cinerea NC008419 1          | Melogale moschata KP726273 1         | 0,18266791 |
| Mustela frenata NC020640 1           | Mungos mungo/gambianus SRR77048      | 0,18266828 |
| Ursus arctos GU573491 207            | Martes flavigula NC012141 3          | 0,18266925 |
| Paradoxurus jerdoni MH464793 1       | Callorhinus ursinus NC008415 1       | 0,18266942 |
| Neophoca cinerea NC008419 1          | Mustela itatzi NC034330 19           | 0,18266952 |
| Melogale moschata V0735A 1           | Galidictis fasciata DM333 1          | 0,18266954 |
| Tremarctos ornatus NC009969 2        | Fossa fossana D350 1                 | 0,18266961 |
| Tremarctos ornatus NC009969 2        | Arctocepalus australis MG023139 1    | 0,18266979 |
| Mungos mungo MNC7 1                  | Arctocepalus gazella BK010918 1      | 0,18267035 |
| Potos flavus T414 1                  | Uva semitorquata MH464789 1          | 0,18267047 |
| Melogale moschata KP726273 1         | Canis adustus KT448271 1             | 0,18267076 |
| Ommatophoca rossii AY377287etc 1     | Nyctereutes procyonoides NC013700 3  | 0,18267088 |
| Vulpes ferrillata NC027935 1         | Nandinia binotata NC024567 1         | 0,18267088 |
| Phocarcos hookeri NC008418 1         | Ailurus fulgens styani NC009691 1    | 0,1826714  |
| Mustela frenata NC020640 1           | Ichneumia albicauda T603 1           | 0,18267186 |
| Otaria byronia OTAB 1                | Aonyx cinerea NC035814 2             | 0,18267293 |
| Smilodon populator MF871700 1        | Mustela nivalis T306 5               | 0,18267404 |
| Helarctos malayanus NC009968 2       | Civettictis civetta NC033378 1       | 0,18267477 |
| Nyctereutes procyonoides NC013700 3  | Mustela erminea T305 2               | 0,18267477 |
| Potos flavus T414 1                  | Paradoxurus hermaphroditus NLNC 1    | 0,18267524 |
| Lutra lutra LC050126 1               | Felis catus NC001700 2               | 0,18267593 |
| Lutra lutra LC050126 1               | Felis nigripes NC028309 1            | 0,18267603 |
| Panthera onca KP202264 2             | Meles meles T303 3                   | 0,18267608 |
| Lycalopex securae KT448284 1         | Arctocepalus townsendi NC008420 1    | 0,18267651 |
| Lutra lutra NC011358 9               | Leopardus jacobita NC028322 1        | 0,18267672 |

|                                       |                                       |            |
|---------------------------------------|---------------------------------------|------------|
| Profelis aurata NC028299 1            | Leopardus guigna NC028321 1           | 0,10039424 |
| Mustela frenata NC020640 1            | Mustela erminea T305 2                | 0,10041729 |
| Ommatophoca rossii AY377287etc 1      | Monachus schauinslandi NC008421 1     | 0,10042308 |
| Leopardus tigrinus NC0028317 1        | Acinonyx jubatus NC005212 3           | 0,10046874 |
| Lycalopex securus KT448284 1          | Canis adustus KT448271 1              | 0,10055067 |
| Otocolobus manul NC028323 1           | Leopardus tigrinus NC028317 1         | 0,10059334 |
| Leopardus tigrinus NC028317 1         | Felis nigripes NC028309 1             | 0,10059365 |
| Neophoca cinerea NC008419 1           | Callorhinus ursinus NC008415 1        | 0,10060958 |
| Leopardus guigna NC028321 1           | Caracal caracal NC028306 1            | 0,10066324 |
| Pusa caspica NC008431 1               | Erignathus barbatus NC008426 1        | 0,10079451 |
| Viverricula indica XK891745 1         | Viverra zibetha T609 1                | 0,10086863 |
| Puma yagouaroundi NC028311 1          | Leopardus geoffroyi NC028320 1        | 0,10099961 |
| Halichoerus grypus NC001602 2         | Erignathus barbatus NC008426 1        | 0,10109231 |
| Leopardus geoffroyi NC028320 1        | Acinonyx jubatus NC005212 3           | 0,10114397 |
| Lutrogale perspicillata NC035811 1    | Lutra lutra NC011358 9                | 0,10115061 |
| Ommatophoca rossii AY377287etc 1      | Monachus monachus NC0044972 5         | 0,10120999 |
| Vulpes zerda KJ603240 1               | Vulpes lagopus NC026529 3             | 0,10125901 |
| Mungos mungo/gambianus SRR7704821 1   | Helogale parvula SRR7637809 1         | 0,10133316 |
| Viverricula indica XK891745 1         | Civettictis civetta GLC19 1           | 0,10154198 |
| Mustela kathiah NC023210 1            | Mustela itatzi NC034330 19            | 0,10156145 |
| Lobodon carcinophaga NC008423 1       | Erignathus barbatus NC008426 1        | 0,10167675 |
| Mustela putorius NC020638 4           | Mustela kathiah NC023210 1            | 0,10169606 |
| Panthera leo NERO 19                  | Neofelis nebulosa NC008450 3          | 0,10171083 |
| Lycalopex securus KT448284 1          | Canis latrans NC008093 7              | 0,1017345  |
| Monachus schauinslandi NC008421 1     | Mirounga leonina NC008422 1           | 0,10174274 |
| Lutrogale perspicillata NC035811 1    | Lutra lutra LC050126 1                | 0,10182328 |
| Profelis aurata NC028299 1            | Leopardus geoffroyi NC028320 1        | 0,10187548 |
| Viverricula indica NC025296 2         | Viverra zibetha T609 1                | 0,10188091 |
| Leopardus guigna NC028321 1           | Acinonyx jubatus NC005212 3           | 0,10188476 |
| Chrysocyon brachyurus NC024172 1      | Canis latrans NC008093 7              | 0,10194567 |
| Phoca largha NC008430 1               | Erignathus barbatus NC008426 1        | 0,10194675 |
| Monachus monachus NC0044972 5         | Mirounga angustirostris SRR10331586 1 | 0,10211045 |
| Viverricula indica XK891751 1         | Viverra zibetha T609 1                | 0,1021248  |
| Phocarcctos hookeri NC008418 1        | Callorhinus ursinus NC008415 1        | 0,10215741 |
| Phoca vitulina NC001325 1             | Erignathus barbatus NC008426 1        | 0,10221624 |
| Mustela nigripes NC024942 1           | Mustela kathiah NC023210 1            | 0,10223448 |
| Martes foina NC020643 1               | Martes flavigula NC012141 3           | 0,10226534 |
| Leopardus geoffroyi NC028320 1        | Caracal caracal NC028306 1            | 0,10227919 |
| Hydrurga leptonyx NC008425 1          | Erignathus barbatus NC008426 1        | 0,10228273 |
| Viverricula indica XK891745 1         | Civettictis civetta NC033378 1        | 0,10237245 |
| Diplogale hosei MH464790 1            | Chrotogale owstoni T607 1             | 0,10244611 |
| Lycaon pictus NC028427 2              | Cuon alpinus NC013445 3               | 0,10249942 |
| Lycalopex securus KT448284 1          | Canis lupus chanco NC010340 4         | 0,10251277 |
| Pardofelis marmorata NLN3 2           | Leopardus guigna NC028321 1           | 0,10254272 |
| Chrysocyon brachyurus NC024172 1      | Canis lupus familiaris NC002008 1231  | 0,10257038 |
| Phoca groenlandica NC008429 54        | Erignathus barbatus NC008426 1        | 0,10261643 |
| Panthera leo spelaea KX258452 2       | Neofelis nebulosa NC008450 3          | 0,10267487 |
| Leopardus tigrinus NC028317 1         | Caracal caracal NC028306 1            | 0,10274804 |
| Pardofelis marmorata NLN3 2           | Leopardus geoffroyi NC028320 1        | 0,10295115 |
| Paguma larvata PDD511 2               | Arctictis binturong T605 2            | 0,10296666 |
| Erignathus barbatus NC008426 1        | Cystophora cristata NC008427 1        | 0,10315109 |
| Profelis aurata NC028299 1            | Leopardus tigrinus NC028317 1         | 0,10315179 |
| Viverricula indica XK891751 1         | Civettictis civetta GLC19 1           | 0,10315803 |
| Chrysocyon brachyurus NC024172 1      | Canis aureus KT448274 1               | 0,10319321 |
| Pusa hispida NC 008433 1              | Leptonyx chotes weddellii NC008424 1  | 0,10335752 |
| Otaria byronia OTAB 1                 | Callorhinus ursinus NC008415 1        | 0,10337169 |
| Mustela kathiah NC023210 1            | Mustela eversmannii NC028013 1        | 0,10337865 |
| Mungos mungo MMC7 1                   | Helogale parvula SRR7637809 1         | 0,10342269 |
| Mustela kathiah NC023210 1            | Mustela altaica NC021751 1            | 0,10345068 |
| Lycalopex securus KT448284 1          | Canis lupus familiaris NC002008 1231  | 0,10352097 |
| Viverra tangalunga MH464792 1         | Mustela erminea T305 2                | 0,10358056 |
| Pardofelis marmorata NLN3 2           | Leopardus tigrinus NC028317 1         | 0,10362406 |
| Lycalopex securus KT448284 1          | Canis mesomelas KT448280 1            | 0,10368806 |
| Viverricula indica NC025296 2         | Civettictis civetta GLC19 1           | 0,10369947 |
| Proteles cristata T393 6              | Parahyaena brunnea NC038159 15        | 0,10384741 |
| Mustela nivalis T306 5                | Mustela kathiah NC023210 1            | 0,10385464 |
| Panthera pardus NC010641 5            | Neofelis nebulosa NC008450 3          | 0,10386203 |
| Panthera pardus japonensis KJ866876 8 | Neofelis nebulosa NC008450 3          | 0,10390835 |
| Mustela sibirica NC020637 6           | Mustela kathiah NC023210 1            | 0,10391708 |
| Viverricula indica XK891751 1         | Civettictis civetta NC033378 1        | 0,10392103 |
| Monachus schauinslandi NC008421 1     | Mirounga angustirostris SRR10331586 1 | 0,10397393 |
| Phoca fasciata NC008428 1             | Leptonyx chotes weddellii NC008424 1  | 0,10403089 |
| Lycalopex securus KT448284 1          | Chrysocyon brachyurus NC024172 1      | 0,10404101 |
| Mustela sibirica AP017394 11          | Mustela kathiah NC023210 1            | 0,10405169 |
| Neovison vison NC020641 3             | Mustela erminea T305 2                | 0,10405549 |
| Chrysocyon brachyurus NC024172 1      | Canis adustus KT448271 1              | 0,10408285 |
| Pusa sibirica NC008432 2              | Leptonyx chotes weddellii NC008424 1  | 0,10409372 |
| Panthera uncia KP202269 1             | Neofelis nebulosa NC008450 3          | 0,10417773 |
| Viverricula indica NC025296 2         | Civettictis civetta NC033378 1        | 0,10419373 |
| Phoca fasciata NC008428 1             | Lobodon carcinophaga NC008423 1       | 0,10430798 |
| Martes martes T302 3                  | Gulo gulo NC009685 3                  | 0,10434999 |
| Panthera onca NC022842 1              | Leopardus pardalis NC028315 1         | 0,10443665 |
| Panthera onca KP202264 2              | Neofelis nebulosa NC008450 3          | 0,10451434 |
| Paradoxurus hermaphroditus NLNC 1     | Arctictis binturong T605 2            | 0,10458227 |
| Pusa caspica NC008431 1               | Leptonyx chotes weddellii NC008424 1  | 0,1046997  |
| Phoca largha NC008430 1               | Leptonyx chotes weddellii NC008424 1  | 0,10484253 |
| Proteles cristata T393 6              | Hyaena hyaena NC020669 1              | 0,10499319 |
| Mustela kathiah NC023210 1            | Mustela frenata NC020640 1            | 0,10526316 |
| Lycalopex securus KT448284 1          | Canis anthus NC027956 2               | 0,10533241 |
| Panthera tigris amoyensis NC014770 2  | Neofelis nebulosa NC008450 3          | 0,10539205 |
| Panthera pardus NC010641 5            | Leopardus pardalis NC028315 1         | 0,1053974  |
| Chrysocyon brachyurus NC024172 1      | Canis lupus chanco NC010340 4         | 0,10547578 |
| Leptonyx chotes weddellii NC008424 1  | Halichoerus grypus NC001602 2         | 0,10553713 |
| Phoca vitulina NC001325 1             | Leptonyx chotes weddellii NC008424 1  | 0,10558342 |
| Phoca largha NC008430 1               | Hydrurga leptonyx NC008425 1          | 0,10559332 |
| Panthera pardus japonensis KJ866876 8 | Leopardus pardalis NC028315 1         | 0,1056432  |
| Pusa hispida NC 008433 1              | Hydrurga leptonyx NC008425 1          | 0,10564939 |
| Chrysocyon brachyurus NC024172 1      | Canis anthus NC027956 2               | 0,10571618 |
| Paradoxurus hermaphroditus NC039591 1 | Arctictis binturong T605 2            | 0,10572654 |
| Martes zibellina NC011579 39          | Gulo gulo NC009685 3                  | 0,10582522 |
| Pusa sibirica NC008432 2              | Hydrurga leptonyx NC008425 1          | 0,10584525 |
| Panthera onca NC022842 1              | Caracal caracal NC028306 1            | 0,10584818 |
| Panthera onca NC022842 1              | Leopardus pardalis T262 1             | 0,10598555 |

|                                        |                                      |            |
|----------------------------------------|--------------------------------------|------------|
| Eupleres goudoti D128 1                | Arctodus simus NC011116 1            | 0,18267722 |
| Paradoxurus jerdoni MH464793 1         | Meles leucurus NC039173 4            | 0,18267736 |
| Felis nigripes NC028309 1              | Ailuurus fulgens stamii NC009691 1   | 0,18267751 |
| Ursus spelaeus NC011112 8              | Gulo gulo NC009685 3                 | 0,18267816 |
| Martes flavigula NC012141 3            | Canis lupus chanco NC010340 4        | 0,18267858 |
| Ursus thibetanus mupinensis NC00875 2  | Martes pennanti NC020664 16          | 0,18267891 |
| Urocyon cinereoargenteus NC026723 2    | Phoca groenlandica NC008429 54       | 0,18267924 |
| Ursus arctos GU573491 207              | Martes zibellina NC011579 39         | 0,18267988 |
| Viverricula indica XK891751 1          | Viverra tangalunga MH464792 1        | 0,18267989 |
| Prionailurus viverrinus NC028305 1     | Callorhinus ursinus NC008415 1       | 0,18268029 |
| Procyon lotor AB462049 4               | Arctotherium sp NC030174 1           | 0,18268044 |
| Urocyon littoralis NC008430 1          | Felis catus NC001700 2               | 0,18268053 |
| Lutra sumatrana NC035810 1             | Profelis aurata NC028299 1           | 0,18268158 |
| Viverra tangalunga MH464792 1          | Martes foina NC020643 1              | 0,1826818  |
| Mungos mungo MMC7 1                    | Mustela putorius NC020638 4          | 0,1826819  |
| Viverricula indica NC025296 2          | Phoca largha NC008430 1              | 0,18268195 |
| Vulpes vulpes NC008434 5               | Melogale moschata KP726273 1         | 0,18268245 |
| Puma yagouaroundi NC028311 1           | Phoca largha NC008430 1              | 0,18268274 |
| Urocyon littoralis catalinae KP129018  | Martes zibellina NC011579 39         | 0,18268299 |
| Puma concolor NC016470 22              | Urocyon cinereoargenteus NC026723 2  | 0,18268305 |
| Urocyon cinereoargenteus NC026723 2    | Phoca vitulina NC001325 1            | 0,18268305 |
| Viverricula indica XK891751 1          | Mustela altaica NC021751 1           | 0,18268345 |
| Paradoxurus hermaphroditus NC03959 1   | Ailuurus fulgens NC011124 1          | 0,18268381 |
| Urocyon cinereoargenteus NC026723 2    | Pusa hispida NC 008433 1             | 0,18268393 |
| Ursus thibetanus mupinensis NC00875 2  | Neophoca cinerea NC008419 1          | 0,18268438 |
| Ursus arctos GU573486 5                | Martes melampus NC009678 1           | 0,18268481 |
| Ursus maritimus NC003428 31            | Martes americana NC020642 1          | 0,18268499 |
| Prionailurus rubiginosus NC028304 2    | Nyctereutes procyonoides NC013700 3  | 0,18268518 |
| Procyon lotor AB462049 4               | Paguma larvata PDD511 2              | 0,18268579 |
| Viverra tangalunga MH464792 1          | Lycaon pictus NC028427 2             | 0,18268603 |
| Ursus arctos pruinosus MG066703 3      | Mustela kathiah NC023210 1           | 0,18268639 |
| Procyon lotor AB462046 3               | Lynx pardinus NC028319 161           | 0,18268679 |
| Procyon lotor AB462049 4               | Leopardus pardalis NC028315 1        | 0,18268746 |
| Procyon lotor AB462049 4               | Leopardus pardalis T262 1            | 0,18268837 |
| Ursus thibetanus formosanus NC0093 1   | Homotherium latidens MF871702 3      | 0,18268858 |
| Ursus thibetanus formosanus NC0093 1   | Martes pennanti NC020664 16          | 0,18268873 |
| Puma yagouaroundi NC028311 1           | Melogale moschata NC020644 1         | 0,18268876 |
| Melogale moschata NC020644 1           | Catopuma badia NC028300 1            | 0,18268934 |
| Melogale moschata NC020644 1           | Felis chaus NC028307 1               | 0,18268996 |
| Prionailurus viverrinus NC028305 1     | Melogale moschata NC020644 1         | 0,18269005 |
| Melursus ursinus NC009970 2            | Callorhinus ursinus NC008415 1       | 0,18269038 |
| Mustela nivalis T306 5                 | Leopardus tigrinus NC028317 1        | 0,18269054 |
| Mustela putorius NC020638 4            | Chrysocyon brachyurus NC024172 1     | 0,1826905  |
| Mustela nivalis T306 5                 | Lycalopex securus KT448284 1         | 0,18269107 |
| Melursus ursinus NC009970 2            | Martes zibellina NC011579 39         | 0,18269154 |
| Meles meles T303 3                     | Arctictis binturong T605 2           | 0,18269233 |
| Phoca largha NC008430 1                | Otocyon megalotis SAF1 2             | 0,18269244 |
| Martes foina NC020643 1                | Genetta servalina NC024568 2         | 0,18269342 |
| Ailuurus fulgens NC011124 1            | Acinonyx jubatus NC005212 3          | 0,18269375 |
| Prionailurus bengalensis CKM45 20      | Canis latrans NC008093 7             | 0,18269403 |
| Ursus thibetanus formosanus NC0093 1   | Neophoca cinerea NC008419 1          | 0,18269497 |
| Viverra zibetha T609 1                 | Lycaon pictus NC028427 2             | 0,1826961  |
| Paradoxurus jerdoni MH464793 1         | Lycaon pictus NC028427 2             | 0,18269917 |
| Ursus spelaeus EU327344 13             | Arctonyx collaris NC020645 1         | 0,18270054 |
| Ursus spelaeus EU327344 13             | Aonyx cinerea NC035814 2             | 0,18270145 |
| Zalophus californianus NC008416 1      | Mungos mungo MMC7 1                  | 0,18270177 |
| Viverricula indica XK891751 1          | Ursus spelaeus EU327344 13           | 0,18270238 |
| Leopardus colocolo NC028314 1          | Canis latrans NC008093 7             | 0,18270254 |
| Zalophus wollebaeki SRR4431565 1       | Melursus ursinus NC009970 2          | 0,18270339 |
| Fossa fossana D350 1                   | Arctocepalus forsteri NC004023 28    | 0,182704   |
| Lutra lutra NC011358 9                 | Canis adustus KT448271 1             | 0,1827078  |
| Zalophus californianus NC008416 1      | Mustela nivalis T306 5               | 0,18270813 |
| Zalophus californianus NC008416 1      | Leopardus pardalis NC028315 1        | 0,18271133 |
| Leopardus pardalis NC028315 1          | Canis lupus familiaris NC002008 1231 | 0,18271501 |
| Civettictis civetta NC033378 1         | Canis anthus NC027956 2              | 0,18271546 |
| Zalophus californianus NC008416 1      | Melursus ursinus NC009970 2          | 0,18271723 |
| Ursus thibetanus thibetanus NC011112 8 | Arctictis binturong T605 2           | 0,18271793 |
| Paguma larvata PDD511 2                | Eumetopias jubatus NC004030 10       | 0,18272261 |
| Pardofelis marmorata NLN3 2            | Martes flavigula NC012141 3          | 0,18272762 |
| Viverricula indica NC025296 2          | Spilogale putorius NC010497 1        | 0,18272634 |
| Felis nigripes NC028309 1              | Canis lupus chanco NC010340 4        | 0,18272766 |
| Leopardus pardalis NC028315 1          | Eumetopias jubatus NC004030 10       | 0,18272862 |
| Neovison vison NC020641 3              | Cuon alpinus NC013445 3              | 0,18273026 |
| Mustela sibirica AP017394 11           | Arctocepalus forsteri KT693377 17    | 0,18273319 |
| Diplogale hosei MH464790 1             | Ailuurus fulgens NC011124 1          | 0,18273354 |
| Viverricula indica XK891751 1          | Enhydra lutris NC009692 1            | 0,1827351  |
| Phocarcctos hookeri NC008418 1         | Mustela kathiah NC023210 1           | 0,18273588 |
| Prionodon linsang ERR2391707 1         | Cystophora cristata NC008427 1       | 0,18273634 |
| Pusa sibirica NC008432 2               | Prionodon linsang ERR2391707 1       | 0,18273634 |
| Neophoca cinerea NC008419 1            | Mustela nigripes NC024942 1          | 0,18273677 |
| Ursus arctos isabellinus 1885 2        | Eumetopias jubatus NC004030 10       | 0,18273678 |
| Pusa caspica NC008431 1                | Nasua nasua NC020647 1               | 0,18273689 |
| Melogale moschata V0735A 1             | Arctocepalus pusillus NC008417 1     | 0,18273698 |
| Ursus arctos EU497665 29               | Martes flavigula NC012141 3          | 0,18273708 |
| Procyon lotor AB462046 3               | Arctocepalus gazella BK010918 1      | 0,18273841 |
| Phocarcctos hookeri NC008418 1         | Aonyx cinerea NC035814 2             | 0,18273894 |
| Melogale moschata NC020644 1           | Arctocepalus australis MG023139 1    | 0,18274051 |
| Mungos mungo/gambianus SRR77048 1      | Arctocepalus pusillus NC008417 1     | 0,18274051 |
| Salanoia concolor D378 1               | Potos flavus T414 1                  | 0,18274198 |
| Viverricula indica XK891745 1          | Melogale moschata KP726273 1         | 0,18274395 |
| Prionailurus viverrinus NC028305 1     | Lutra lutra NC011358 9               | 0,18274468 |
| Lutra lutra LC050126 1                 | Leopardus guigna NC028321 1          | 0,18274477 |
| Melogale moschata NC020644 1           | Galidictis fasciata DM333 1          | 0,18274489 |
| Vulpes vulpes NC008434 5               | Viverra zibetha T609 1               | 0,1827457  |
| Melogale moschata KP726273 1           | Genetta abyssinica MG489822 1        | 0,18274593 |
| Ursus spelaeus EU327344 13             | Gulo gulo NC009685 3                 | 0,18274614 |
| Ursus ferrillata NC027935 1            | Viverricula indica XK891751 1        | 0,18274632 |
| Pardofelis marmorata NLN3 2            | Mustela frenata NC020640 1           | 0,18274634 |
| Taxidea taxus NC020646 1               | Ailuropoda melanoleuca NC009492 5    | 0,18274674 |
| Puma concolor NC016470 22              | Mustela eversmannii NC028013 1       | 0,18274775 |
| Lutra sumatrana NC035810 1             | Leptailurus serval NC028316 1        | 0,18274781 |
| Tremarctos ornatus NC009969 2          | Prionailurus planiceps KY682741 4    | 0,18274842 |
| Lynx pardinus NC028319 161             | Arctocepalus forsteri KT693377 17    | 0,18274949 |
| Mustela nivalis T306 5                 | Canis latrans NC008093 7             | 0,18275037 |

|                                       |                                       |            |
|---------------------------------------|---------------------------------------|------------|
| Mustela itatsi NC034330 19            | Mustela frenata NC020640 1            | 0,1060035  |
| Crossarchus platycephalus C7R66 1     | Attilax paludinosus T606 1            | 0,10604633 |
| Prionailurus bengalensis NC028301 12  | Panthera onca NC022842 1              | 0,10611864 |
| Phoca vitulina NC001325 1             | Hydrurga leptonyx NC008425 1          | 0,10626661 |
| Pusa caspica NC008431 1               | Hydrurga leptonyx NC008425 1          | 0,10632539 |
| Panthera uncia NC010638 1             | Neofelis nebulosa NC008450 3          | 0,10633267 |
| Mirounga leonina NC008422 1           | Erigonathus barbatus NC008426 1       | 0,10638298 |
| Panthera leo NERO 19                  | Leopardus pardalis NC028315 1         | 0,10647979 |
| Panthera onca NC022842 1              | Leopardus wiedii NC028318 1           | 0,10652421 |
| Pusa hispida NC 008433 1              | Lobodon carcinophaga NC008423 1       | 0,10652503 |
| Chrysocony brachyurus NC024172 1      | Canis mesomelas KT448280 1            | 0,10655015 |
| Speothos venaticus C48 2              | Canis adustus KT448271 1              | 0,10676356 |
| Martes melampus NC009678 1            | Gulo gulo NC009685 3                  | 0,10676717 |
| Phoca fasciata NC008428 1             | Hydrurga leptonyx NC008425 1          | 0,1070014  |
| Prionailurus rubiginosus NC028304 2   | Panthera onca NC022842 1              | 0,10706139 |
| Pusa sibirica NC008432 2              | Lobodon carcinophaga NC008423 1       | 0,10706609 |
| Panthera tigris NC010642 35           | Neofelis nebulosa NC008450 3          | 0,10707556 |
| Prionailurus planiceps KY682741 4     | Panthera onca NC022842 1              | 0,10719581 |
| Panthera pardus NC010641 5            | Leopardus pardalis T262 1             | 0,10721596 |
| Paradoxurus jerdoni MH464793 1        | Arctictis binturong T605 2            | 0,10727572 |
| Panthera pardus NC010641 5            | Lynx lynx NC027083 4                  | 0,10728251 |
| Martes americana NC020642 1           | Gulo gulo NC009685 3                  | 0,10730594 |
| Speothos venaticus C48 2              | Canis latrans NC008093 7              | 0,10745759 |
| Martes flavigula NC012141 3           | Gulo gulo NC009685 3                  | 0,10747208 |
| Prionailurus bengalensis NC028301 12  | Panthera pardus japonensis KJ866876 8 | 0,10752761 |
| Mungos mungo MM7 1                    | Ura semitorquata MH464789 1           | 0,10753009 |
| Panthera pardus NC010641 5            | Leopardus wiedii NC028318 1           | 0,10755217 |
| Mustela frenata NC020640 1            | Mustela altaica NC021751 1            | 0,10755652 |
| Panthera pardus japonensis KJ866876 8 | Leopardus wiedii NC028318 1           | 0,10766329 |
| Prionailurus bengalensis NC028301 12  | Panthera pardus NC010641 5            | 0,10768496 |
| Prionailurus bengalensis NC028301 12  | Panthera leo NERO 19                  | 0,1076889  |
| Mustela nivalis T306 5                | Mustela frenata NC020640 1            | 0,10769139 |
| Mungos mungo MM7 1                    | Cynictis penicillata T375 1           | 0,10773081 |
| Phoca groenlandica NC008429 54        | Leptonychotes weddellii NC008424 1    | 0,10773432 |
| Pusa caspica NC008431 1               | Lobodon carcinophaga NC008423 1       | 0,10773937 |
| Mustela nigripes NC024942 1           | Mustela frenata NC020640 1            | 0,1077534  |
| Panthera leo NERO 19                  | Leopardus pardalis T262 1             | 0,10775919 |
| Lobodon carcinophaga NC008423 1       | Hailchoerus grypus NC001602 2         | 0,10776845 |
| Ura semitorquata MH464789 1           | Crossarchus platycephalus C7R66 1     | 0,10779693 |
| Proteles cristata T393 6              | Crocota crocata NC020670 3            | 0,10782142 |
| Panthera leo NERO 19                  | Lynx lynx NC027083 4                  | 0,10782518 |
| Panthera onca NC022842 1              | Felis silvestris lybica KP202275 4    | 0,10786692 |
| Panthera onca NC022842 1              | Leopardus colocolo NC028314 1         | 0,10788245 |
| Hydrurga leptonyx NC008425 1          | Hailchoerus grypus NC001602 2         | 0,10790405 |
| Phoca largha NC008430 1               | Lobodon carcinophaga NC008423 1       | 0,10794977 |
| Prionailurus rubiginosus NC028304 2   | Panthera pardus NC010641 5            | 0,10795502 |
| Mungos mungo MM7 1                    | Xenogale naso C07XAR110 1             | 0,10800053 |
| Prionailurus bengalensis NC028301 12  | Panthera onca KP202264 2              | 0,10806625 |
| Puma concolor NC016470 22             | Panthera onca NC022842 1              | 0,10807144 |
| Leptonychotes weddellii NC008424 1    | Cystophora cristata NC008427 1        | 0,10813358 |
| Hydrurga leptonyx NC008425 1          | Cystophora cristata NC008427 1        | 0,10814243 |
| Panthera leo NERO 19                  | Lynx rufus NC014456 3                 | 0,10816077 |
| Panthera pardus japonensis KJ866876 8 | Leopardus pardalis T262 1             | 0,10826935 |
| Prionailurus planiceps NC028312 6     | Panthera onca NC022842 1              | 0,10827315 |
| Phoca vitulina NC001325 1             | Lobodon carcinophaga NC008423 1       | 0,10828641 |
| Panthera pardus japonensis KJ866876 8 | Lynx lynx NC027083 4                  | 0,10833558 |
| Prionailurus rubiginosus NC028304 2   | Panthera pardus japonensis KJ866876 8 | 0,10833558 |
| Panthera onca KP202264 2              | Leopardus pardalis NC028315 1         | 0,10833695 |
| Prionailurus bengalensis CKM45 20     | Panthera onca NC022842 1              | 0,10834292 |
| Lycan pictus NC028427 2               | Lycalopex sechurae KT448284 1         | 0,10835931 |
| Prionailurus rubiginosus NC028304 2   | Panthera onca KP202264 2              | 0,10840291 |
| Panthera uncia KP202269 1             | Leopardus pardalis NC028315 1         | 0,10840404 |
| Lobodon carcinophaga NC008423 1       | Cystophora cristata NC008427 1        | 0,10847886 |
| Panthera onca NC022842 1              | Felis chaus NC028307 1                | 0,10854263 |
| Galerella sanguinea T378 1            | Crossarchus platycephalus C7R66 1     | 0,1085448  |
| Panthera onca KP202264 2              | Leopardus pardalis T262 1             | 0,10860634 |
| Mungos mungo MM7 1                    | Attilax paludinosus T606 1            | 0,10860679 |
| Panthera pardus NC010641 5            | Felis silvestris lybica KP202275 4    | 0,10862828 |
| Prionailurus bengalensis CKM45 20     | Panthera leo NERO 19                  | 0,10863402 |
| Xenogale naso C07XAR110 1             | Crossarchus platycephalus C7R66 1     | 0,10867223 |
| Prionodon pardicolor NC024569 2       | Prionodon frenatus ERR2391707 1       | 0,10868199 |
| Mustela sibirica AP017394 11          | Mustela frenata NC020640 1            | 0,10869565 |
| Mustela sibirica NC020637 6           | Mustela frenata NC020640 1            | 0,10869565 |
| Neovison vison NC020641 3             | Mustela kathiah NC023210 1            | 0,10869961 |
| Panthera pardus NC010641 5            | Lynx pardus NC028319 161              | 0,10876375 |
| Panthera leo NERO 19                  | Leopardus wiedii NC028318 1           | 0,10876903 |
| Panthera onca KP202264 2              | Caracal caracal NC028306 1            | 0,10880689 |
| Panthera onca NC022842 1              | Leptailurus serval NC028316 1         | 0,10887926 |
| Prionailurus viverrinus NC028305 1    | Panthera onca NC022842 1              | 0,10888122 |
| Neovison vison NC020641 3             | Mustela itatsi NC034330 19            | 0,10890142 |
| Phoca groenlandica NC008429 54        | Hydrurga leptonyx NC008425 1          | 0,10895478 |
| Panthera onca KP202264 2              | Leopardus wiedii NC028318 1           | 0,10901026 |
| Profelis aurata NC028299 1            | Panthera onca NC022842 1              | 0,10901394 |
| Lutra sumatrana NC035810 1            | Enhydra lutris NC009692 1             | 0,10902483 |
| Prionailurus bengalensis NC028301 12  | Panthera leo spelaea KX258452 2       | 0,10905714 |
| Mungos mungo MM7 1                    | Galerella sanguinea T378 1            | 0,10908611 |
| Phoca groenlandica NC008429 54        | Lobodon carcinophaga NC008423 1       | 0,10909839 |
| Monachus monachus NC044972 5          | Erigonathus barbatus NC008426 1       | 0,10917401 |
| Panthera leo NERO 19                  | Felis silvestris lybica KP202275 4    | 0,10923751 |
| Puma concolor NC016470 22             | Panthera leo NERO 19                  | 0,10923778 |
| Panthera pardus japonensis KJ866876 8 | Felis silvestris lybica KP202275 4    | 0,10927821 |
| Panthera onca NC022842 1              | Lynx lynx NC027083 4                  | 0,10928298 |
| Panthera onca NC022842 1              | Lynx rufus NC014456 3                 | 0,10928316 |
| Panthera pardus japonensis KJ866876 8 | Lynx pardus NC028319 161              | 0,10934554 |
| Prionailurus planiceps KY682741 4     | Panthera onca KP202264 2              | 0,10934554 |
| Panthera leo NERO 19                  | Leopardus tigrinus NC028317 1         | 0,10937355 |
| Pardofelis marmorata NLN3 2           | Panthera onca NC022842 1              | 0,10941792 |
| Lutra lutra LC050126 1                | Enhydra lutris NC009692 1             | 0,10942863 |
| Mustela frenata NC020640 1            | Mustela eversmanni NC028013 1         | 0,10943599 |
| Panthera pardus NC010641 5            | Leopardus colocolo NC028314 1         | 0,10944887 |
| Cynictis penicillata T375 1           | Crossarchus platycephalus C7R66 1     | 0,1094802  |
| Mungos mungo/gambianus SRR7704821 1   | Ura semitorquata MH464789 1           | 0,10954753 |
| Panthera onca KP202264 2              | Felis silvestris lybica KP202275 4    | 0,10954753 |

|                                       |                                      |            |
|---------------------------------------|--------------------------------------|------------|
| Callorhinus ursinus NC008415 1        | Ailuropoda melanoleuca NC009492 5    | 0,18275067 |
| Panthera leo NERO 19                  | Ommatophoca rossii AY377287etc 1     | 0,18275078 |
| Urocyon littoralis catalinae KP129018 | Pusa hispida NC 008433 1             | 0,18275119 |
| Taxidea taxus NC020646 1              | Panthera pardus japonensis KJ866876  | 0,18275173 |
| Genetta servalina NC024568 2          | Arctotherium sp NC030174 1           | 0,18275228 |
| Ursus arctos EU497665 29              | Martes americana NC020642 1          | 0,18275245 |
| Ursus arctos isabellinus 1885 2       | Ailuurus fulgens NC011124 1          | 0,18275259 |
| Prionailurus bengalensis CKM45 20     | Melogale moschata KP726273 1         | 0,18275329 |
| Poecilogale albinucha T602 1          | Arctocepalus pusillus NC008417 1     | 0,18275343 |
| Procyon lotor AB462046 3              | Lynx canadensis NC028313 1           | 0,18275352 |
| Procyon lotor AB462046 3              | Felis catus NC001700 2               | 0,18275462 |
| Procyon lotor AB462046 3              | Prionailurus planiceps KY682741 4    | 0,18275513 |
| Ursus maritimus NC003428 31           | Melogale moschata NC020644 1         | 0,18275549 |
| Paguma larvata PDD511 2               | Lycalopex sechurae KT448284 1        | 0,18275558 |
| Prionailurus planiceps NC028312 6     | Melogale moschata NC020644 1         | 0,18275604 |
| Ursus spelaeus EU327344 13            | Callorhinus ursinus NC008415 1       | 0,18275747 |
| Mustela nivalis T306 5                | Felis silvestris lybica KP202275 4   | 0,18275806 |
| Ursus thibetanus thibetanus NC011118  | Martes pennanti NC020664 1           | 0,18275945 |
| Ursus arctos pruinosus MG066703 3     | Melogale moschata NC020644 1         | 0,18276201 |
| Ursus thibetanus formosanus NC00933   | Salanoia concolor D378 1             | 0,18276222 |
| Ursus spelaeus NC011112 8             | Arctocepalus townsendi NC008420 1    | 0,18276373 |
| Leopardus colocolo NC028314 1         | Ailuurus fulgens styani NC009691 1   | 0,18276595 |
| Mustela nigripes NC024942 1           | Helarctos malayanus NC009968 2       | 0,18276688 |
| Ursus arctos AP012576 6               | Melogale moschata NC020644 1         | 0,18276694 |
| Helarctos malayanus NC009968 2        | Arctonyx collaris NC020645 1         | 0,18276717 |
| Phoca groenlandica NC008429 54        | Panthera leo spelaea KX258452 2      | 0,18276995 |
| Lynx rufus NC014456 3                 | Canis aureus KT448274 1              | 0,1827703  |
| Paradoxurus hermaphroditus NLNC 1     | Ailuropoda melanoleuca NC009492 5    | 0,18277086 |
| Felis margarita NC028308 1            | Chrysocony brachyurus NC024172 1     | 0,18277419 |
| Ursus thibetanus thibetanus NC011118  | Felis chaus NC028307 1               | 0,18277423 |
| Ursus spelaeus NC011112 8             | Poecilogale albinucha T602 1         | 0,18277439 |
| Leopardus colocolo NC028314 1         | Aonyx cinerea NC035814 2             | 0,18277515 |
| Ursus thibetanus formosanus NC00933   | Leopardus geoffroyi NC028320 1       | 0,1827759  |
| Nontra canadensis SRR10409165 1       | Homotherium latidens MF871702 3      | 0,18277723 |
| Martes flavigula NC012141 3           | Canis anthus NC027956 2              | 0,18277819 |
| Meles anakuma NC009677 1              | Diplogale hosei MH464790 1           | 0,18277884 |
| Canis adustus KT448271 1              | Arctocepalus townsendi NC008420 1    | 0,18278666 |
| Panthera pardus NC010641 5            | Mustela frenata NC020640 1           | 0,18278714 |
| Viverricula indica KX891745 1         | Ursus americanus JX196366 3          | 0,18278953 |
| Gulo gulo NC009685 3                  | Catopuma badia NC028300 1            | 0,18279015 |
| Prionodon pardicolor NC024569 2       | Monachus monachus NC044972 5         | 0,18279034 |
| Procyon lotor AB462046 3              | Civettictis civetta NC033378 1       | 0,18279332 |
| Prionailurus bengalensis NC028301 12  | Eumetopias jubatus NC004030 10       | 0,18279417 |
| Cystophora cristata NC008427 1        | Cynogale bennetti KY117544 1         | 0,18279484 |
| Leopardus pardalis T262 1             | Eumetopias jubatus NC004030 10       | 0,18279594 |
| Genetta abyssinica MG489822 1         | Ailuurus fulgens NC011124 1          | 0,18279737 |
| Prionailurus bengalensis CKM45 20     | Eumetopias jubatus NC004030 10       | 0,18279877 |
| Mustela kathiah NC023210 1            | Arctocepalus australis MG023139 1    | 0,18279949 |
| Phocarctos hookeri NC008418 1         | Meles leucurus NC039173 4            | 0,18280022 |
| Melogale moschata V0735A 1            | Arctocepalus townsendi NC008420 1    | 0,18280058 |
| Melogale moschata V0735A 1            | Arctocepalus australis MG023139 1    | 0,18280138 |
| Mungotictis decemlineata NC027828 3   | Martes melampus NC009678 1           | 0,18280214 |
| Mungotictis decemlineata NC027828 3   | Lutra lutra LC050126 1               | 0,1828029  |
| Mustela frenata NC020640 1            | Cynictis penicillata T375 1          | 0,18280321 |
| Mustela erminea T305 2                | Helogale parvula SRR7637809 1        | 0,18280409 |
| Melogale moschata NC020644 1          | Ura semitorquata MH464789 1          | 0,18280838 |
| Panthera uncia KP202269 1             | Ommatophoca rossii AY377287etc 1     | 0,18280976 |
| Potos flavus T414 1                   | Galidictis fasciata DM333 1          | 0,18281001 |
| Paradoxurus jerdoni MH464793 1        | Meles anakuma NC009677 1             | 0,1828104  |
| Ursus arctos GU573486 5               | Martes flavigula NC012141 3          | 0,18281052 |
| Puma yagouaroundi NC028311 1          | Callorhinus ursinus NC008415 1       | 0,18281242 |
| Viverricula indica NC025296 2         | Lutra sumatrana NC035810 1           | 0,18281278 |
| Catopuma badia NC028300 1             | Callorhinus ursinus NC008415 1       | 0,18281294 |
| Meles anakuma NC009677 1              | Felis chaus NC028307 1               | 0,18281294 |
| Ursus arctos isabellinus 1885 2       | Martes melampus NC009678 1           | 0,18281299 |
| Ura semitorquata MH464789 1           | Arctodus simus NC011116 1            | 0,18281345 |
| Ursus thibetanus mupinensis NC00875   | Arctocepalus townsendi NC008420 1    | 0,18281388 |
| Martes melampus NC009678 1            | Caracal caracal NC028306 1           | 0,1828142  |
| Xenogale naso C07XAR110 1             | Arctodus simus NC011116 1            | 0,18281433 |
| Mustela sibirica AP017394 11          | Felis catus NC001700 2               | 0,18281527 |
| Melogale moschata KP726273 1          | Felis margarita NC028308 1           | 0,1828167  |
| Phoca largha NC008430 1               | Nasua nasua NC020647 1               | 0,18281682 |
| Phoca largha NC008430 1               | Canis anthus NC027956 2              | 0,18281701 |
| Vulpes lagopus NC026529 3             | Prionailurus bengalensis NC028301 12 | 0,18281785 |
| Martes americana NC020642 1           | Leopardus jacobita NC028322 1        | 0,18281852 |
| Ursus arctos isabellinus 1885 2       | Mustela frenata NC020640 1           | 0,18281935 |
| Procyon lotor AB462049 4              | Lynx lynx NC027083 4                 | 0,1828202  |
| Arctotherium sp NC030174 1            | Aonyx cinerea NC035814 2             | 0,18282112 |
| Nyctereutes procyonoides NC013700 3   | Leopardus guigna NC028321 1          | 0,18282163 |
| Ursus maritimus GU573488 Svalbard     | Mustela itatsi NC034330 19           | 0,18282203 |
| Procyon lotor AB462046 3              | Felis margarita NC028308 1           | 0,18282263 |
| Meles anakuma NC009677 1              | Arctictis binturong T605 2           | 0,18282512 |
| Zalophus wollebaeki SRR4431565 1      | Ursus arctos isabellinus 1885 2      | 0,18282537 |
| Nandinia binotata NC024567 1          | Mephitis mephitis NC020648 1         | 0,18282574 |
| Ursus arctos GU573486 5               | Mustela frenata NC020640 1           | 0,18282618 |
| Felis nigripes NC028309 1             | Arctodus simus NC011116 1            | 0,18282624 |
| Canis aureus KT448274 1               | Attilax paludinosus T606 1           | 0,18282741 |
| Pardofelis marmorata NLN3 2           | Canis adustus KT448271 1             | 0,18282828 |
| Lycan pictus NC028427 2               | Civettictis civetta GLC19 1          | 0,18282959 |
| Lutra lutra LC050126 1                | Leopardus wiedii NC028318 1          | 0,18282999 |
| Martes flavigula NC012141 3           | Felis chaus NC028307 1               | 0,18283057 |
| Ursus thibetanus thibetanus NC011118  | Salanoia concolor D378 1             | 0,18283176 |
| Smilodon populator MF871700 1         | Otocyon megalotis SAF1 2             | 0,18283202 |
| Leptailurus serval NC028316 1         | Ictonyx striatus T299 1              | 0,18283226 |
| Zalophus californianus NC008416 1     | Potos flavus T414 1                  | 0,1828327  |
| Mustela eversmanni NC028013 1         | Helarctos malayanus NC009968 2       | 0,18283351 |
| Neovison vison NC020641 3             | Lycalopex sechurae KT448284 1        | 0,18283612 |
| Ursus spelaeus EU327344 13            | Civettictis civetta GLC19 1          | 0,18283708 |
| Ursus thibetanus laniger MH281753 2   | Felis margarita NC028308 1           | 0,18284084 |
| Viverra zibetha T609 1                | Mephitis mephitis NC020648 1         | 0,18284129 |
| Melurus ursinus NC009970 2            | Leopardus pardalis T262 1            | 0,18284228 |
| Ursus thibetanus thibetanus NC011118  | Caracal caracal NC028306 1           | 0,182843   |
| Helarctos malayanus NC009968 2        | Catopuma temminckii NC027115 41      | 0,18284477 |

|                                       |                                       |            |
|---------------------------------------|---------------------------------------|------------|
| Panthera onca NC022842 1              | Catopuma badia NC028300 1             | 0,10955283 |
| Prionailurus viverrinus NC028305 1    | Panthera pardus japonensis KJ866876 8 | 0,10961661 |
| Panthera onca NC022842 1              | Felis catus NC001700 2                | 0,10961982 |
| Lycalopex sechurae KT448284 1         | Cuon alpinus NC013445 3               | 0,10962098 |
| Panthera pardus NC010641 5            | Caracal caracal NC028306 1            | 0,10963762 |
| Panthera pardus NC010641 5            | Leptailurus serval NC028316 1         | 0,10963784 |
| Mustela putorius NC020638 4           | Mustela frenata NC020640 1            | 0,10963791 |
| Speothos venaticus C48 2              | Canis lupus chanco NC010340 4         | 0,10964075 |
| Prionailurus rubiginosus NC028304 2   | Panthera leo NERO 19                  | 0,10964191 |
| Puma concolor NC016470 22             | Panthera uncia KP202269 1             | 0,10968219 |
| Panthera leo NERO 19                  | Leopardus geoffroyi NC028320 1        | 0,10971253 |
| Panthera pardus japonensis KJ866876 8 | Leopardus colocolo NC028314 1         | 0,10976216 |
| Panthera leo NERO 19                  | Lynx pardinus NC028319 161            | 0,10977777 |
| Panthera leo spelaea KX258452 2       | Lynx lynx NC027083 4                  | 0,10979509 |
| Ommatophoca rossii AY377287etc 1      | Erigonathus barbatus NC008426 1       | 0,10980333 |
| Puma concolor NC016470 22             | Panthera leo spelaea KX258452 2       | 0,10986503 |
| Panthera uncia KP202269 1             | Felis chaus NC028307 1                | 0,10988419 |
| Panthera pardus japonensis KJ866876 8 | Leopardus jacobita NC028322 1         | 0,10988542 |
| Prionailurus bengalensis CKM45 20     | Panthera pardus japonensis KJ866876 8 | 0,10988647 |
| Panthera onca NC022842 1              | Felis margarita NC028308 1            | 0,10988993 |
| Puma yagouaroundi NC028311 1          | Panthera onca NC022842 1              | 0,10988963 |
| Neovison vison NC020641 3             | Mustela nigripes NC024942 1           | 0,10991083 |
| Ichneumia albicauda T603 1            | Crossarchus platycephalus C7R66 1     | 0,10995947 |
| Prionailurus viverrinus NC028305 1    | Panthera pardus NC010641 5            | 0,10997698 |
| Panthera leo NERO 19                  | Lynx canadensis NC028313 1            | 0,10998005 |
| Panthera uncia KP202269 1             | Leopardus pardalis T262 1             | 0,1100202  |
| Panthera onca NC022842 1              | Lynx canadensis NC028313 1            | 0,1100237  |
| Mungos mungo/gambianus SRR7704821 1   | Galerella sanguinea T378 1            | 0,11002706 |
| Panthera pardus japonensis KJ866876 8 | Caracal caracal NC028306 1            | 0,11008618 |
| Panthera tigris amoyensis NC014770 2  | Leopardus wiedii NC028318 1           | 0,11009104 |
| Panthera onca NC022842 1              | Leopardus geoffroyi NC028320 1        | 0,11009316 |
| Speothos venaticus C48 2              | Canis aureus KT448274 1               | 0,11014017 |
| Panthera pardus japonensis KJ866876 8 | Leptailurus serval NC028316 1         | 0,11015351 |
| Puma concolor NC016470 22             | Panthera onca KP202264 2              | 0,11015351 |
| Prionailurus bengalensis NC028301 12  | Panthera tigris NC010642 35           | 0,11015692 |
| Panthera onca KP202264 2              | Leopardus colocolo NC028314 1         | 0,11016662 |
| Panthera leo NERO 19                  | Leptailurus serval NC028316 1         | 0,11018062 |
| Prionailurus bengalensis CKM45 20     | Panthera leo spelaea KX258452 2       | 0,11020471 |
| Crossarchus platycephalus C7R66 1     | Bdeogale nigripes GLC15 1             | 0,11022084 |
| Panthera uncia KP202269 1             | Felis silvestris lybica KP202275 4    | 0,11022084 |
| Prionailurus bengalensis NC028301 12  | Panthera tigris amoyensis NC014770 2  | 0,11022431 |
| Prionailurus bengalensis CKM45 20     | Panthera pardus NC010641 5            | 0,1102468  |
| Martes foina NC020643 1               | Gulo gulo NC009685 3                  | 0,11027119 |
| Mungos mungo/gambianus SRR7704821 1   | Attilax paludinosus T606 1            | 0,11028817 |
| Lycyon pictus NC028427 2              | Chrysoyon brachyurus NC024172 1       | 0,11029693 |
| Panthera leo spelaea KX258452 2       | Leopardus pardalis NC028315 1         | 0,11033605 |
| Prionailurus bengalensis CKM45 20     | Panthera onca KP202264 2              | 0,11035782 |
| Speothos venaticus C48 2              | Canis mesomelas KT448280 1            | 0,11035958 |
| Panthera tigris amoyensis NC014770 2  | Leopardus pardalis NC028315 1         | 0,11036018 |
| Panthera leo NERO 19                  | Caracal caracal NC028306 1            | 0,11038265 |
| Panthera uncia KP202269 1             | Catopuma badia NC028300 1             | 0,11042284 |
| Prionailurus bengalensis NC028301 12  | Panthera uncia KP202269 1             | 0,11042284 |
| Prionailurus planiceps NC028312 6     | Panthera onca KP202264 2              | 0,11042284 |
| Panthera onca NC022842 1              | Leopardus tigrinus NC028317 1         | 0,11042975 |
| Panthera leo spelaea KX258452 2       | Felis silvestris lybica KP202275 4    | 0,11047108 |
| Panthera pardus japonensis KJ866876 8 | Lynx rufus NC014456 3                 | 0,11049017 |
| Suricata suricatta SSM10 1            | Crossarchus platycephalus C7R66 1     | 0,11049017 |
| Panthera onca NC022842 1              | Lynx pardinus NC028319 161            | 0,11049511 |
| Panthera pardus NC010641 5            | Felis catus NC001700 2                | 0,11051366 |
| Speothos venaticus C48 2              | Canis anthus NC027956 2               | 0,11055449 |
| Panthera uncia NC010638 1             | Leopardus pardalis NC028315 1         | 0,11055862 |
| Prionailurus viverrinus NC028305 1    | Panthera onca KP202264 2              | 0,11055956 |
| Neovison vison NC020641 3             | Mustela eversmannii NC028013 1        | 0,11058377 |
| Fossa fossana D350 1                  | Eupleres goudotii D128 1              | 0,11062647 |
| Panthera pardus NC010641 5            | Leopardus jacobita NC028322 1         | 0,11065066 |
| Prionailurus viverrinus NC028305 1    | Panthera leo NERO 19                  | 0,11065485 |
| Panthera leo spelaea KX258452 2       | Leopardus pardalis T262 1             | 0,11067311 |
| Prionailurus rubiginosus NC028304 2   | Panthera leo spelaea KX258452 2       | 0,11067355 |
| Panthera onca KP202264 2              | Felis chaus NC028307 1                | 0,11069217 |
| Panthera pardus japonensis KJ866876 8 | Lynx canadensis NC028313 1            | 0,11069217 |
| Prionailurus bengalensis CKM45 20     | Panthera tigris amoyensis NC014770 2  | 0,11070446 |
| Panthera pardus NC010641 5            | Lynx canadensis NC028313 1            | 0,11071689 |
| Panthera tigris amoyensis NC014770 2  | Lynx lynx NC027083 4                  | 0,11076232 |
| Panthera uncia KP202269 1             | Leopardus colocolo NC028314 1         | 0,11077237 |
| Neovison vison NC020641 3             | Mustela putorius NC020638 4           | 0,11078572 |
| Panthera leo NERO 19                  | Felis catus NC001700 2                | 0,11078604 |
| Panthera tigris NC010642 35           | Leopardus wiedii NC028318 1           | 0,1108319  |
| Panthera tigris amoyensis NC014770 2  | Leopardus colocolo NC028314 1         | 0,11084359 |
| Panthera leo spelaea KX258452 2       | Leopardus wiedii NC028318 1           | 0,11087529 |
| Puma yagouaroundi NC028311 1          | Panthera onca KP202264 2              | 0,11089416 |
| Mungos mungo MMC7 1                   | Ichneumia albicauda T603 1            | 0,11097189 |
| Panthera onca KP202264 2              | Lynx rufus NC014456 3                 | 0,11102882 |
| Panthera pardus japonensis KJ866876 8 | Felis catus NC001700 2                | 0,11102882 |
| Suricata suricatta SSM10 1            | Mungos mungo/gambianus SRR7704821 1   | 0,11102882 |
| Puma concolor NC016470 22             | Panthera tigris amoyensis NC014770 2  | 0,1110329  |
| Panthera leo NERO 19                  | Leopardus guigna NC028321 1           | 0,11109594 |
| Panthera onca KP202264 2              | Lynx lynx NC027083 4                  | 0,11109615 |
| Panthera onca KP202264 2              | Lynx pardinus NC028319 161            | 0,11109615 |
| Urva javanica T413 1                  | Crossarchus platycephalus C7R66 1     | 0,11109615 |
| Panthera onca NC022842 1              | Otocolobus manul NC028323 1           | 0,11110169 |
| Mirounga angustirostris SRR10331586 1 | Erigonathus barbatus NC008426 1       | 0,11110552 |
| Panthera pardus NC010641 5            | Lynx rufus NC014456 3                 | 0,11111905 |
| Martes pennanti NC010966 16           | Martes americana NC020642 1           | 0,11111986 |
| Neovison vison NC020641 3             | Mustela sibirica NC020637 6           | 0,11112238 |
| Panthera leo NERO 19                  | Felis margarita NC028308 1            | 0,11112276 |
| Panthera leo NERO 19                  | Leopardus jacobita NC028322 1         | 0,11112624 |
| Mungos mungo/gambianus SRR7704821 1   | Xenogale naso C07XAR110 1             | 0,11116348 |
| Panthera onca KP202264 2              | Leptailurus serval NC028316 1         | 0,11116348 |
| Panthera onca KP202264 2              | Lynx canadensis NC028313 1            | 0,11116348 |
| Panthera onca NC022842 1              | Felis nigripes NC028309 1             | 0,1111685  |
| Lutra lutra NC011358 9                | Enhydra lutris NC009692 1             | 0,11117841 |
| Speothos venaticus C48 2              | Canis lupus familiaris NC002008 1231  | 0,11118237 |
| Panthera onca KP202264 2              | Catopuma badia NC028300 1             | 0,11123081 |

|                                       |                                      |            |
|---------------------------------------|--------------------------------------|------------|
| Paradoxurus hermaphroditus NC03959    | Canis lupus familiaris NC002008 1231 | 0,18284746 |
| Puma concolor NC016470 22             | Canis lupus familiaris NC002008 1231 | 0,18285151 |
| Phoca largha NC008430 1               | Canis mesomelas KT448280 1           | 0,18285312 |
| Otocolobus manul NC028323 1           | Martes flavigula NC012141 3          | 0,18285554 |
| Ursus americanus JX193636 3           | Mustela frenata NC020640 1           | 0,18285623 |
| Genetta abyssinica MG489822 1         | Canis lupus chanco NC010340 4        | 0,18285641 |
| Ommatophoca rossii AY377287etc 1      | Urva javanica T413 1                 | 0,18285787 |
| Ommatophoca rossii AY377287etc 1      | Bdeogale nigripes GLC15 1            | 0,18286008 |
| Spilogale putorius NC010497 1         | Paguma larvata PDS11 2               | 0,18286014 |
| Prionailurus rubiginosus NC028304 2   | Eumetopias jubatus NC004030 10       | 0,18286163 |
| Cuon alpinus NC013445 3               | Caracal caracal NC028306 1           | 0,18286608 |
| Mustela itatzi NC034330 19            | Chrotogale owstoni TC19 1            | 0,18286675 |
| Viverra tangalunga MH464792 1         | Arctocepalus townsendi NC008420 1    | 0,18286745 |
| Urva semitorquata MH464789 1          | Arctonyx collaris NC020645 1         | 0,18286823 |
| Callorhinus ursinus NC008415 1        | Attilax paludinosus T606 1           | 0,18286873 |
| Ommatophoca rossii AY377287etc 1      | Helogale parvula SRR773809 1         | 0,18287092 |
| Ursus maritimus NC003428 31           | Eumetopias jubatus NC004030 10       | 0,18287133 |
| Canis adustus KT448271 1              | Arctocepalus australis MGO23139 1    | 0,18287134 |
| Ursus thibetanus formosanus NC0093    | Civettictis civetta NC033378 1       | 0,18287307 |
| Ichneumia albicauda T603 1            | Bassariscus sumichrasti SRX1099089 1 | 0,18287624 |
| Potos flavus T414 1                   | Paradoxurus hermaphroditus NC03959   | 0,18287684 |
| Procyon lotor AB462049 4              | Arctocepalus pusillus NC008417 1     | 0,18287998 |
| Lutra sumatrana NC035810 1            | Canis adustus KT448271 1             | 0,18288086 |
| Neovison vison NC020641 3             | Xenogale naso C07XAR110 1            | 0,18288104 |
| Viverricula indica KX891751 1         | Mustela sibirica AP017394 11         | 0,18288116 |
| Profelis aurata NC028299 1            | Ailurus fulgens styani NC009691 1    | 0,18288182 |
| Phoca fasciata NC008428 1             | Nasua nasua NC020647 1               | 0,18288183 |
| Ursus maritimus GU573488 Svalbard     | Martes zibellina NC011579 39         | 0,18288191 |
| Mustela eversmannii NC028013 1        | Civettictis civetta GLC19 1          | 0,18288209 |
| Mustela putorius NC020638 4           | Leopardus tigrinus NC028317 1        | 0,18288223 |
| Lutra sumatrana NC035810 1            | Leopardus tigrinus NC028317 1        | 0,18288228 |
| Mustela putorius NC020638 4           | Caracal caracal NC028306 1           | 0,18288326 |
| Mustela nivalis T306 5                | Arctocepalus pusillus NC008417 1     | 0,18288344 |
| Mustela itatzi NC034330 19            | Felis chaus NC028307 1               | 0,18288393 |
| Vulpes vulpes NC008434 5              | Felis margarita NC028308 1           | 0,1828842  |
| Mustela kathiah NC023210 1            | Genetta genetta T297 1               | 0,18288437 |
| Prionailurus bengalensis NC028301 12  | Melogale moschata KP276273 1         | 0,18288441 |
| Viverra zibetha T609 1                | Melogale moschata NC020644 1         | 0,18288484 |
| Urocyon littoralis catalinae KP129018 | Phoca vitulina NC001325 1            | 0,18288507 |
| Prionailurus planiceps KY682741 4     | Martes zibellina NC011579 39         | 0,18288518 |
| Melogale moschata V0735A 1            | Arctocepalus guigna NC028321 1       | 0,18288596 |
| Salanoia concolor D378 1              | Martes foina NC020643 1              | 0,18288648 |
| Ursus arctos EU497665 29              | Mustela frenata NC020640 1           | 0,18288687 |
| Mustela sibirica NC020637 6           | Lycyon pictus NC028427 2             | 0,18288709 |
| Procyon lotor AB462049 4              | Genetta servalina NC024568 2         | 0,18288711 |
| Poecilogale albinucha T602 1          | Paradoxurus hermaphroditus NLNC 1    | 0,18288717 |
| Poecilogale albinucha T602 1          | Conepatus chinga NC042596 1          | 0,18288727 |
| Procyon lotor AB462049 4              | Lynx pardinus NC028319 161           | 0,18288846 |
| Ursus arctos GU573491 207             | Mustela eversmannii NC028013 1       | 0,18288849 |
| Ursus maritimus GU573488 Svalbard     | Melogale moschata NC020644 1         | 0,18288919 |
| Zalophus wollebaeki SRR4431565 1      | Procyon lotor AB462049 4             | 0,18289158 |
| Ursus thibetanus formosanus NC0093    | Arctocepalus australis MGO23139 1    | 0,18289268 |
| Neovison vison NC020641 3             | Felis catus NC001700 2               | 0,18289432 |
| Pardofelis marmorata NLN3 2           | Ictonyx striatus T299 1              | 0,182898   |
| Lutra sumatrana NC035810 1            | Acinonyx jubatus NC005212 3          | 0,18289863 |
| Ursus thibetanus mupinensis NC00875   | Catopuma temminckii NC027115 41      | 0,18290065 |
| Viverricula indica NC025296 2         | Ailuropoda melanoleuca NC009492 5    | 0,18290082 |
| Prionodon pardicolor NC024569 2       | Phoca vitulina NC001325 1            | 0,18290094 |
| Prionodon pardicolor NC024569 2       | Phoca largha NC008430 1              | 0,18290104 |
| Prionodon pardicolor NC024569 2       | Neovison vison NC020641 3            | 0,18290168 |
| Speothos venaticus C48 2              | Homotherium latidens MF871702 3      | 0,18290244 |
| Paradoxurus hermaphroditus NLNC 1     | Chrysoyon brachyurus NC024172 1      | 0,18290298 |
| Ursus arctos AP012576 6               | Mustela eversmannii NC028013 1       | 0,1829036  |
| Smilodon populator MF871700 1         | Canis latrans NC008093 7             | 0,18290445 |
| Ursus thibetanus thibetanus NC011118  | Otaria byronia OTAB 1                | 0,18290497 |
| Mungos mungo/gambianus SRR77048       | Canis lupus familiaris NC002008 1231 | 0,18290538 |
| Leopardus jacobita NC028322 1         | Chrysoyon brachyurus NC024172 1      | 0,18290882 |
| Lycalopex sechurae KT448284 1         | Felis silvestris lybica KP202275 4   | 0,18291202 |
| Leopardus wiedii NC028318 1           | Canis mesomelas KT448280 1           | 0,18291207 |
| Ursus americanus JX193636 3           | Arctocepalus townsendi NC008420 1    | 0,18291368 |
| Leopardus geoffroyi NC028320 1        | Chrysoyon brachyurus NC024172 1      | 0,18291484 |
| Melogale moschata V0735A 1            | Civettictis civetta NC033378 1       | 0,18291493 |
| Conepatus chinga NC042596 1           | Callorhinus ursinus NC008415 1       | 0,18292023 |
| Mustela nivalis T306 5                | Canis lupus chanco NC010340 4        | 0,1829212  |
| Puma yagouaroundi NC028311 1          | Gulo gulo NC009685 3                 | 0,18292354 |
| Gallitaxis vittata T412 1             | Eumetopias jubatus NC004030 10       | 0,18292646 |
| Mustela kathiah NC023210 1            | Arctocepalus townsendi NC008420 1    | 0,18293363 |
| Phocarcos hookeri NC008418 1          | Meles meles T303 3                   | 0,18293469 |
| Prionailurus bengalensis CKM45 20     | Canis lupus chanco NC010340 4        | 0,18293765 |
| Vulpes corsac NC023958 1              | Pusa sibirica NC008432 2             | 0,18293779 |
| Ursus spelaeus EU327344 13            | Canis adustus KT448271 1             | 0,18293914 |
| Galerella sanguinea T378 1            | Canis latrans NC008093 7             | 0,18293931 |
| Crossarchus platycephalus C7R66 1     | Arctocepalus gazella BK010918 1      | 0,18293951 |
| Smilodon populator MF871700 1         | Lycalopex sechurae KT448284 1        | 0,18293983 |
| Urocyon littoralis catalinae KP129018 | Erigonathus barbatus NC008426 1      | 0,18293983 |
| Prionodon linsang ERR2391707 1        | Canis latrans NC008093 7             | 0,18294281 |
| Lutra lutra NC011358 9                | Leptailurus serval NC028316 1        | 0,18294398 |
| Leopardus wiedii NC028318 1           | Ailurus fulgens styani NC009691 1    | 0,18294539 |
| Poecilogale albinucha T602 1          | Callorhinus ursinus NC008415 1       | 0,18294744 |
| Felis chaus NC028307 1                | Arctonyx collaris NC020645 1         | 0,18294786 |
| Prionailurus rubiginosus NC028304 2   | Ailurus fulgens styani NC009691 1    | 0,18294805 |
| Otocolobus manul NC028323 1           | Ailurus fulgens styani NC009691 1    | 0,18294901 |
| Paradoxurus hermaphroditus NLNC 1     | Mustela sibirica NC020637 6          | 0,1829491  |
| Ursus maritimus NC003428 31           | Martes zibellina NC011579 39         | 0,18294924 |
| Cynictis penicillata T375 1           | Arctodus simus NC011116 1            | 0,18294932 |
| Viverricula indica KX891745 1         | Tremarctos ornatus NC009969 2        | 0,18295008 |
| Leopardus guigna NC028321 1           | Callorhinus ursinus NC008415 1       | 0,18295041 |
| Potos flavus T414 1                   | Felis nigripes NC028309 1            | 0,18295047 |
| Potos flavus T414 1                   | Catopuma temminckii NC027115 41      | 0,18295068 |
| Pardofelis marmorata NLN3 2           | Martes americana NC020642 1          | 0,18295148 |
| Poecilogale albinucha T602 1          | Neophoca cinerea NC008419 1          | 0,18295169 |
| Vulpes lagopus NC026529 3             | Phoca vitulina NC001325 1            | 0,18295169 |
| Ursus arctos GU573486 5               | Taxidea taxus NC020646 1             | 0,18295191 |

|                                       |                                       |            |
|---------------------------------------|---------------------------------------|------------|
| Panthera uncia KP202269 1             | Caracal caracal NC028306 1            | 0,11123081 |
| Profelis aurata NC028299 1            | Panthera onca KP202264 2              | 0,11123081 |
| Panthera onca KP202264 2              | Leopardus geoffroyi NC028320 1        | 0,11123274 |
| Puma concolor NC016470 22             | Panthera pardus NC010641 5            | 0,11125449 |
| Panthera leo spelaea KX258452 2       | Lynx rufus NC014456 3                 | 0,11127779 |
| Panthera leo spelaea KX258452 2       | Lynx gardinus NC028319 161            | 0,11127786 |
| Panthera onca KP202264 2              | Felis catus NC001700 2                | 0,11129814 |
| Panthera onca KP202264 2              | Felis margarita NC028308 1            | 0,11129814 |
| Profelis aurata NC028299 1            | Panthera uncia KP202269 1             | 0,11129814 |
| Panthera uncia KP202269 1             | Leopardus wiedii NC028318 1           | 0,11129949 |
| Panthera onca NC022842 1              | Leopardus jacobita NC028322 1         | 0,11130507 |
| Prionailurus planiceps KY682741 4     | Panthera pardus NC010641 5            | 0,11132249 |
| Panthera leo NERO 19                  | Leopardus colocolo NC028314 1         | 0,11133867 |
| Panthera leo spelaea KX258452 2       | Leopardus colocolo NC028314 1         | 0,11135845 |
| Panthera pardus japonensis KJ866876 8 | Felis nigripes NC028309 1             | 0,11136547 |
| Prionailurus rubiginosus NC028304 2   | Panthera tigris amoyensis NC014770 2  | 0,11136896 |
| Panthera pardus NC010641 5            | Felis margarita NC028308 1            | 0,11138899 |
| Panthera leo spelaea KX258452 2       | Felis catus NC001700 2                | 0,11141415 |
| Prionailurus planiceps KY682741 4     | Panthera pardus japonensis KJ866876 8 | 0,11150014 |
| Prionailurus planiceps KY682741 4     | Panthera uncia KP202269 1             | 0,11150014 |
| Speothos venaticus C48 2              | Lycan pictus NC028427 2               | 0,11150153 |
| Panthera leo NERO 19                  | Catopuma badia NC028300 1             | 0,11152771 |
| Prionailurus planiceps KY682741 4     | Panthera leo NERO 19                  | 0,11152811 |
| Suricata suricatta SS5M10 1           | Mungos mungo MMMC7 1                  | 0,11156958 |
| Panthera pardus NC010641 5            | Felis nigripes NC028309 1             | 0,11159129 |
| Puma yagouaroundi NC028311 1          | Panthera leo NERO 19                  | 0,11159487 |
| Neovison vison NC020641 3             | Mustela nivalis T306 5                | 0,11159886 |
| Panthera uncia KP202269 1             | Felis catus NC001700 2                | 0,11163448 |
| Panthera tigris amoyensis NC014770 2  | Leopardus pardalis T262 1             | 0,11163961 |
| Viverra tangalunga MH464792 1         | Mustela nigripes NC024942 1           | 0,11165702 |
| Martes pennanti NC020664 16           | Martes melampus NC009678 1            | 0,11165722 |
| Neovison vison NC020641 3             | Mustela sibirica AP017394 11          | 0,11166085 |
| Cuon alpinus NC013445 3               | Chrysocyon brachyurus NC024172 1      | 0,11166325 |
| Panthera pardus japonensis KJ866876 8 | Felis margarita NC028308 1            | 0,11170213 |
| Panthera uncia KP202269 1             | Felis margarita NC028308 1            | 0,11170213 |
| Puma concolor NC016470 22             | Panthera pardus japonensis KJ866876 8 | 0,11170213 |
| Prionailurus viverrinus NC028305 1    | Panthera leo spelaea KX258452 2       | 0,11175341 |
| Panthera tigris NC010642 35           | Leopardus pardalis NC028315 1         | 0,11177424 |
| Panthera onca NC022842 1              | Leopardus guigna NC028321 1           | 0,11177659 |
| Panthera pardus NC010641 5            | Felis chaus NC028307 1                | 0,11179215 |
| Panthera leo spelaea KX258452 2       | Leopardus jacobita NC028322 1         | 0,11181859 |
| Prionailurus planiceps KY682741 4     | Panthera leo spelaea KX258452 2       | 0,11181927 |
| Prionailurus rubiginosus NC028304 2   | Panthera uncia KP202269 1             | 0,11183679 |
| Profelis aurata NC028299 1            | Panthera pardus japonensis KJ866876 8 | 0,11183679 |
| Panthera tigris NC010642 35           | Leopardus geoffroyi NC028320 1        | 0,11184244 |
| Martes zibellina NC011579 39          | Martes pennanti NC020664 16           | 0,11185908 |
| Panthera pardus NC010641 5            | Leopardus tigrinus NC028317 1         | 0,11186281 |
| Martes pennanti NC020664 16           | Martes martes T302 3                  | 0,11186752 |
| Panthera uncia KP202269 1             | Felis nigripes NC028309 1             | 0,11190412 |
| Panthera pardus NC010641 5            | Leopardus geoffroyi NC028320 1        | 0,11193191 |
| Neovison vison NC020641 3             | Mustela altaica NC021751 1            | 0,11193526 |
| Panthera leo spelaea KX258452 2       | Felis margarita NC028308 1            | 0,11195268 |
| Panthera leo spelaea KX258452 2       | Leptailurus serval NC028316 1         | 0,11195433 |
| Mungos mungo/gambianus SRR7704821 1   | Cynictis penicillata T375 1           | 0,11197145 |
| Panthera uncia KP202269 1             | Lynx rufus NC014456 3                 | 0,11197145 |
| Panthera pardus japonensis KJ866876 8 | Leopardus tigrinus NC028317 1         | 0,11197266 |
| Puma concolor NC016470 22             | Panthera tigris NC010642 35           | 0,11197564 |
| Viverra tangalunga MH464792 1         | Mustela itatsi NC034330 19            | 0,11199354 |
| Prionailurus planiceps NC028312 6     | Panthera pardus NC010641 5            | 0,11199606 |
| Ursa javanica/auripunctata NC006835 1 | Crossarchus platycephalus C7R66 1     | 0,11200777 |
| Panthera leo spelaea KX258452 2       | Leopardus tigrinus NC028317 1         | 0,11202134 |
| Profelis aurata NC028299 1            | Panthera pardus NC010641 5            | 0,11202665 |
| Panthera pardus japonensis KJ866876 8 | Leopardus geoffroyi NC028320 1        | 0,11210819 |
| Neofelis nebulosa NC008450 3          | Felis chaus NC028307 1                | 0,11212622 |
| Panthera pardus NC010641 5            | Leopardus guigna NC028321 1           | 0,11213311 |
| Pardofelis marmorata NLN3 2           | Panthera uncia KP202269 1             | 0,11217345 |
| Prionailurus planiceps NC028312 6     | Panthera pardus japonensis KJ866876 8 | 0,11217345 |
| Panthera uncia NC010638 1             | Leopardus pardalis T262 1             | 0,11217474 |
| Panthera tigris NC010642 35           | Lynx lynx NC027083 4                  | 0,11217622 |
| Panthera tigris amoyensis NC014770 2  | Catopuma badia NC028300 1             | 0,11217622 |
| Prionailurus rubiginosus NC028304 2   | Panthera tigris NC010642 35           | 0,11217696 |
| Procyon lotor AB462046 3              | Bassariscus sumichrasti SRX1099089 1  | 0,11218779 |
| Puma yagouaroundi NC028311 1          | Panthera pardus NC010641 5            | 0,11219721 |
| Pardofelis marmorata NLN3 2           | Panthera onca KP202264 2              | 0,11224078 |
| Prionailurus planiceps NC028312 6     | Panthera uncia KP202269 1             | 0,11224078 |
| Prionailurus bengalensis CKM45 20     | Panthera tigris NC010642 35           | 0,11225236 |
| Panthera tigris NC010642 35           | Leopardus colocolo NC028314 1         | 0,11225782 |
| Panthera onca KP202264 2              | Leopardus tigrinus NC028317 1         | 0,1123098  |
| Panthera uncia KP202269 1             | Leopardus guigna NC028321 1           | 0,1123099  |
| Prionailurus bengalensis CKM45 20     | Panthera uncia KP202269 1             | 0,11231069 |
| Panthera tigris amoyensis NC014770 2  | Leptailurus serval NC028316 1         | 0,11231118 |
| Panthera pardus NC010641 5            | Catopuma badia NC028300 1             | 0,11233193 |
| Prionailurus planiceps NC028312 6     | Panthera leo spelaea KX258452 2       | 0,11235831 |
| Ursa brachyura KY117547 1             | Crossarchus platycephalus C7R66 1     | 0,11237544 |
| Panthera tigris NC010642 35           | Leopardus pardalis T262 1             | 0,11238039 |
| Panthera tigris amoyensis NC014770 2  | Leopardus geoffroyi NC028320 1        | 0,11238101 |
| Viverra tangalunga MH464792 1         | Mustela kathiah NC023210 1            | 0,11239737 |
| Viverra tangalunga MH464792 1         | Mustela putorius NC020638 4           | 0,11239737 |
| Panthera leo NERO 19                  | Catopuma temminckii NC027115 41       | 0,11240295 |
| Panthera uncia KP202269 1             | Leopardus geoffroyi NC028320 1        | 0,11244445 |
| Phoca fasciata NC008428 1             | Mirounga leonina NC008422 1           | 0,11244747 |
| Prionailurus planiceps NC028312 6     | Panthera leo NERO 19                  | 0,11247139 |
| Panthera tigris amoyensis NC014770 2  | Lynx gardinus NC028319 161            | 0,11251323 |
| Panthera tigris NC010642 35           | Lynx pardinus NC028319 161            | 0,11251325 |
| Panthera onca NC022842 1              | Catopuma temminckii NC027115 41       | 0,11251512 |
| Panthera leo spelaea KX258452 2       | Caracal caracal NC028306 1            | 0,11255978 |
| Panthera leo spelaea KX258452 2       | Leopardus geoffroyi NC028320 1        | 0,11256035 |
| Speothos venaticus C48 2              | Chrysocyon brachyurus NC024172 1      | 0,11258615 |
| Panthera uncia NC010638 1             | Felis silvestris lybica KP202275 4    | 0,11264476 |
| Mungos mungo/gambianus SRR7704821 1   | Ichneumia albicauda T603 1            | 0,11265392 |
| Panthera leo spelaea KX258452 2       | Lynx canadensis NC028313 1            | 0,11269173 |
| Panthera uncia KP202269 1             | Leopardus jacobita NC028322 1         | 0,11271349 |
| Panthera tigris amoyensis NC014770 2  | Leopardus jacobita NC028322 1         | 0,11278445 |

|                                       |                                     |            |
|---------------------------------------|-------------------------------------|------------|
| Phoca vitulina NC001325 1             | Canis anthus NC027956 2             | 0,18295202 |
| Prionailurus planiceps NC028312 6     | Martes zibellina NC011579 39        | 0,18295239 |
| Phoca largha NC008430 1               | Nyctereutes procyonoides NC013700 3 | 0,18295321 |
| Prionailurus planiceps KY682741 4     | Canis aureus NC027956 2             | 0,18295398 |
| Taxidea taxus NC020646 1              | Galerella sanguinea T378 1          | 0,18295404 |
| Halichoerus grypus NC001602 2         | Canis mesomelas KT448280 1          | 0,18295439 |
| Prionailurus viverrinus NC028305 1    | Nyctereutes procyonoides NC013700 3 | 0,18295519 |
| Mustela kathiah NC023210 1            | Arctocephalus forsteri NC004023 28  | 0,18295549 |
| Melogale moschata NC020644 1          | Genetta genetta T297 1              | 0,18295597 |
| Ursus arctos GU573486 5               | Arctocephalus gazella BK010918 1    | 0,18295726 |
| Prionailurus bengalensis NC028301 12  | Melogale moschata NC020644 1        | 0,18295783 |
| Procyon lotor AB462046 3              | Felis chaus NC028307 1              | 0,18295822 |
| Procyon lotor AB462049 4              | Otocolobus manu NC028323 1          | 0,18295878 |
| Felis nigripes NC028309 1             | Canis aureus KT448274 1             | 0,18295935 |
| Viverricula indica KX891745 1         | Martes foina NC020643 1             | 0,18295941 |
| Zalophus wolfebaeki SRR4431565 1      | Ursus arctos GU573491 207           | 0,18296012 |
| Leopardus jacobita NC028322 1         | Aonyx cinerea NC035814 2            | 0,18296014 |
| Prionodon pardicolor NC024569 2       | Mustela nivalis T306 5              | 0,18296179 |
| Ursus thibetanus mupinensis NC00875   | Lynx canadensis NC028313 1          | 0,18296212 |
| Ursus thibetanus mupinensis NC00875   | Lynx pardinus NC028319 161          | 0,18296295 |
| Melursus ursinus NC009970 2           | Meles leucurus NC039173 4           | 0,18296428 |
| Martes foina NC020643 1               | Felis nigripes NC028309 1           | 0,18296535 |
| Puma yagouaroundi NC028311 1          | Ictonyx striatus T299 1             | 0,18296574 |
| Ursus thibetanus mupinensis NC00875   | Felis chaus NC028307 1              | 0,18296586 |
| Meles anakuma NC009677 1              | Helarctos malayanus NC009968 2      | 0,18296731 |
| Viverricula indica KX891745 1         | Ailuropoda melanoleuca NC009492 5   | 0,18296738 |
| Ursus thibetanus mupinensis NC00875   | Leopardus guigna NC028321 1         | 0,18296829 |
| Zalophus wolfebaeki SRR4431565 1      | Leopardus tigrinus NC028317 1       | 0,18296967 |
| Ursus arctos isabellinus 1885 2       | Canis adustus KT448271 1            | 0,18296985 |
| Zalophus californianus NC008416 1     | Lutrogale perspicillata NC035811 1  | 0,18297271 |
| Leopardus pardalis T262 1             | Canis mesomelas KT448280 1          | 0,1829744  |
| Ursus thibetanus thibetanus NC011118  | Poecilogale albinucha T602 1        | 0,18297587 |
| Panthera uncia NC010638 1             | Canis adustus KT448271 1            | 0,18297675 |
| Lynx lynx NC027083 4                  | Lycalopex secureus KT448284 1       | 0,18297765 |
| Leopardus tigrinus NC028317 1         | Canis lupus chanco NC010340 4       | 0,18297786 |
| Canis adustus KT448271 1              | Arctocephalus pusillus NC008417 1   | 0,18298182 |
| Zalophus californianus NC008416 1     | Catopuma badia NC028300 1           | 0,18298271 |
| Zalophus californianus NC008416 1     | Otocolobus manu NC028323 1          | 0,18298309 |
| Phoca groenlandica NC008429 54        | Cuon alpinus NC013445 3             | 0,18299051 |
| Ursus americanus JX196366 3           | Melogale moschata NC020644 1        | 0,18299167 |
| Panthera pardus japonensis KJ866876 8 | Ommatophoca rossii AY377287etc 1    | 0,18299194 |
| Leopardus guigna NC028321 1           | Gulo gulo NC009685 3                | 0,1829924  |
| Crossarchus platycephalus C7R66 1     | Talopus terrestris T358             | 0,1829949  |
| Phocartos hookeri NC008418 1          | Homotherium latidens MF871702 3     | 0,18299563 |
| Chrotogale owstoni T607 1             | Arctocephalus australis MG023139 1  | 0,18299593 |
| Utra lura NC011358 9                  | Crossarchus platycephalus C7R66 1   | 0,18299697 |
| Otocyon megalotis SAF1 2              | Halichoerus grypus NC001602 2       | 0,18299834 |
| Ursus spelaeus EU327344 13            | Genetta abyssinica MG489822 1       | 0,18299887 |
| Enhydra lutris NC009692 1             | Arctocephalus forsteri KT693377 17  | 0,1829994  |
| Mustela sibirica NC020637 6           | Arctocephalus gazella BK010918 1    | 0,18300338 |
| Martes pennanti NC020664 16           | Conepatus chinga NC042596 1         | 0,18300672 |
| Smilodon populator MF871700 1         | Canis mesomelas KT448280 1          | 0,183007   |
| Nasua nasua NC020647 1                | Mirounga leonina NC008422 1         | 0,18300702 |
| Mungos mungo/gambianus SRR7704821 1   | Canis latrans NC008093 7            | 0,18300703 |
| Nyctereutes procyonoides NC013700 3   | Hemigalus derbyanus MH464791 1      | 0,1830073  |
| Viverra tangalunga MH464792 1         | Tremarctos ornatus NC009969 2       | 0,18300962 |
| Prionailurus planiceps NC028312 6     | Lutra lutra NC011358 9              | 0,18301228 |
| Felis nigripes NC028309 1             | Arctonyx collaris NC020645 1        | 0,1830142  |
| Ursus maritimus GU573488 Svalbard     | Martes melampus NC009678 1          | 0,18301529 |
| Urocyon littoralis catalinae KP129018 | Phoca groenlandica NC008429 54      | 0,18301596 |
| Ursus arctos isabellinus 1885 2       | Enhydra lutris NC009692 1           | 0,18301733 |
| Mustela nigripes NC024942 1           | Felis nigripes NC028309 1           | 0,18301758 |
| Profelis aurata NC028299 1            | Mustela kathiah NC023210 1          | 0,18301778 |
| Mustela itatsi NC034330 19            | Arctotherium sp NC030174 1          | 0,18301795 |
| Puma concolor NC016470 22             | Melogale moschata KP726273 1        | 0,18301825 |
| Prionailurus planiceps NC028312 6     | Arctocephalus forsteri KT693377 17  | 0,18301839 |
| Lutrogale perspicillata NC035811 1    | Arctodus simus NC011116 1           | 0,18301864 |
| Vulpes lagopus NC026529 3             | Phoca largha NC008430 1             | 0,18301888 |
| Urocyon cinereoargenteus NC026723 2   | Phoca largha NC008430 1             | 0,18301944 |
| Vulpes zerdia KI603240 1              | Prionailurus rubiginosus NC028304 2 | 0,18301994 |
| Vulpes vulpes NC008434 5              | Ommatophoca rossii AY377287etc 1    | 0,18302131 |
| Ursus maritimus NC003428 31           | Mustela frenata NC020640 1          | 0,18302153 |
| Ursus maritimus GU573488 Svalbard     | Mustela frenata NC020640 1          | 0,18302155 |
| Vulpes lagopus NC026529 3             | Catopuma badia NC028300 1           | 0,18302198 |
| Hemigalus derbyanus MH464791 1        | Ailuropoda melanoleuca NC009492 5   | 0,1830222  |
| Zalophus wolfebaeki SRR4431565 1      | Mungos mungo/gambianus SRR7704821 1 | 0,18302356 |
| Procyon lotor AB462049 4              | Felis margarita NC028308 1          | 0,18302415 |
| Smilodon populator MF871700 1         | Ictonyx striatus T299 1             | 0,18302432 |
| Neovison vison NC020641 3             | Cynogale bennetti KY117544 1        | 0,18302451 |
| Catopuma badia NC028300 1             | Arctocephalus pusillus NC008417 1   | 0,18302488 |
| Viverra zibetha T609 1                | Ursus arctos GU573491 207           | 0,18302499 |
| Martes pennanti NC020664 16           | Leopardus pardalis NC028315 1       | 0,18302543 |
| Pardofelis marmorata NLN3 2           | Canis aureus KT448274 1             | 0,18302554 |
| Melogale moschata NC020644 1          | Felis catus NC001700 2              | 0,18302605 |
| Prionailurus rubiginosus NC028304 2   | Arctotherium sp NC030174 1          | 0,18302669 |
| Otocyon megalotis SAF1 2              | Leopardus wiedii NC028318 1         | 0,18302777 |
| Ursus arctos GU573486 5               | Ailuurus fulgens NC011124 1         | 0,18302785 |
| Speothos venaticus C48 2              | Pusa hispida NC008433 1             | 0,18302818 |
| Smilodon populator MF871700 1         | Meles meles T303 3                  | 0,18302833 |
| Viverra zibetha T609 1                | Lycalopex secureus KT448284 1       | 0,18303017 |
| Mungos mungo MMMC7 1                  | Canis aureus KT448274 1             | 0,1830323  |
| Viverricula indica KX891751 1         | Ictonyx striatus T299 1             | 0,18303299 |
| Ursus arctos AP012576 6               | Ailuurus fulgens NC011124 1         | 0,18303579 |
| Vulpes vulpes NC008434 5              | Leopardus colocolo NC028314 1       | 0,18303721 |
| Paradoxurus hermaphroditus NC03959    | Chrysocyon brachyurus NC024172 1    | 0,18303734 |
| Lycalopex secureus KT448284 1         | Arctictis binturong T605 2          | 0,18303968 |
| Eumetopias jubatus NC004030 10        | Chrotogale owstoni T607 1           | 0,18303972 |
| Ursus spelaeus NC011112 8             | Mustela altaica NC021751 1          | 0,1830404  |
| Martes pennanti NC020664 16           | Acinonyx jubatus NC005212 3         | 0,18304209 |
| Puma concolor NC016470 22             | Lycalopex secureus KT448284 1       | 0,18304281 |
| Ursus spelaeus NC011112 8             | Leopardus pardalis NC028315 1       | 0,183043   |
| Vulpes vulpes NC008434 5              | Genetta abyssinica MG489822 1       | 0,18304594 |
| Zalophus californianus NC008416 1     | Prionailurus viverrinus NC028305 1  | 0,18304637 |

|                                       |                                       |            |
|---------------------------------------|---------------------------------------|------------|
| Procyon lotor AB462049 4              | Bassariscus sumichrasti SRX1099089 1  | 0,11279359 |
| Prionailurus bengalensis CKM45 20     | Neofelis nebulosa NCO08450 3          | 0,11280221 |
| Panthera pardus NCO10641 5            | Catopuma temminckii NCO27115 41       | 0,11280426 |
| Puma yagouaroundi NCO28311 1          | Panthera leo spelaea KX258452 2       | 0,11282917 |
| Panthera pardus japonensis KJ866876 8 | Felis chaus NCO28307 1                | 0,11284675 |
| Puma yagouaroundi NCO28311 1          | Panthera pardus japonensis KJ866876 8 | 0,11284675 |
| Panthera onca KP202264 2              | Leopardus guigna NCO28321 1           | 0,11284865 |
| Panthera tigris amoyensis NCO14770 2  | Felis chaus NCO28307 1                | 0,11284973 |
| Profelis aurata NCO28299 1            | Panthera leo NERO 19                  | 0,11287371 |
| Pardofelis marmorata NLN3 2           | Panthera leo NERO 19                  | 0,11287486 |
| Panthera pardus japonensis KJ866876 8 | Catopuma badia NCO28300 1             | 0,11291409 |
| Prionailurus viverrinus NCO28305 1    | Panthera tigris amoyensis NCO14770 2  | 0,11291893 |
| Panthera uncia KP202269 1             | Leptailurus serval NCO28316 1         | 0,11298142 |
| Panthera uncia NCO10638 1             | Caracal caracal NCO28306 1            | 0,11298142 |
| Panthera uncia KP202269 1             | Lynx lynx NCO27083 4                  | 0,11304875 |
| Suricata suricatta SSM10 1            | Helogale parvula SRR7637809 1         | 0,11304875 |
| Panthera tigris amoyensis NCO14770 2  | Lynx canadensis NCO28313 1            | 0,11305147 |
| Panthera tigris amoyensis NCO14770 2  | Felis silvestris lybica KP202275 4    | 0,11305166 |
| Prionailurus bengalensis NCO28301 12  | Neofelis nebulosa NCO08450 3          | 0,11306931 |
| Neofelis nebulosa NCO08450 3          | Leopardus pardalis T262 1             | 0,11306951 |
| Panthera uncia KP202269 1             | Catopuma temminckii NCO27115 41       | 0,11311608 |
| Puma yagouaroundi NCO28311 1          | Panthera tigris amoyensis NCO14770 2  | 0,11312006 |
| Panthera tigris amoyensis NCO14770 2  | Leopardus tigrinus NCO28317 1         | 0,11312076 |
| Panthera leo NERO 19                  | Felis chaus NCO28307 1                | 0,11314273 |
| Panthera pardus japonensis KJ866876 8 | Leopardus guigna NCO28321 1           | 0,11318552 |
| Panthera tigris NCO10642 35           | Leopardus jacobita NCO28322 1         | 0,11318865 |
| Neofelis nebulosa NCO08450 3          | Felis silvestris lybica KP202275 4    | 0,11320306 |
| Prionailurus rubiginosus NCO28304 2   | Neofelis nebulosa NCO08450 3          | 0,11321735 |
| Viverra tangalunga MH464792 1         | Mustela nivalis T306 5                | 0,11327769 |
| Panthera tigris amoyensis NCO14770 2  | Lynx rufus NCO14456 3                 | 0,11332152 |
| Pusa hispida NC 008433 1              | Mirounga leonina NCO08422 1           | 0,11332264 |
| Phoca fasciata NCO08428 1             | Mirounga angustirostris SRR10331586 1 | 0,11333221 |
| Panthera leo spelaea KX258452 2       | Catopuma badia NCO28300 1             | 0,11336846 |
| Panthera leo spelaea KX258452 2       | Leopardus guigna NCO28321 1           | 0,11336875 |
| Puma yagouaroundi NCO28311 1          | Panthera uncia KP202269 1             | 0,1133854  |
| Prionailurus viverrinus NCO28305 1    | Panthera uncia KP202269 1             | 0,11338738 |
| Viverra tangalunga MH464792 1         | Mustela sibirica NCO20637 6           | 0,11340692 |
| Puma concolor NCO16470 22             | Panthera uncia NCO10638 1             | 0,11345273 |
| Mungos mungo/gambianus SRR7704821 1   | Bdeogale nigripes GLC15 1             | 0,11352006 |
| Panthera uncia NCO10638 1             | Catopuma badia NCO28300 1             | 0,11352006 |
| Panthera uncia NCO10638 1             | Felis chaus NCO28307 1                | 0,11352006 |
| Mungos mungo MCM7 1                   | Bdeogale nigripes GLC15 1             | 0,1135216  |
| Phoca groenlandica NCO08429 54        | Mirounga leonina NCO08422 1           | 0,11352498 |
| Prionailurus viverrinus NCO28305 1    | Panthera tigris NCO10642 35           | 0,11352515 |
| Viverra tangalunga MH464792 1         | Mustela eversmannii NCO28013 1        | 0,11354153 |
| Viverra tangalunga MH464792 1         | Mustela sibirica AP017394 11          | 0,11354153 |
| Viverra tangalunga MH464792 1         | Mustela altaica NCO21751 1            | 0,11354671 |
| Panthera onca KP202264 2              | Otocolobus manul NCO28323 1           | 0,11358739 |
| Prionailurus planiceps KY682741 4     | Panthera tigris amoyensis NCO14770 2  | 0,11359039 |
| Panthera tigris NCO10642 35           | Leopardus tigrinus NCO28317 1         | 0,11359233 |
| Monachus schauinslandi NCO08421 1     | Erignathus barbatus NCO08426 1        | 0,11366242 |
| Speothos venaticus C48 2              | Uon alpinus NCO13445 3                | 0,113674   |
| Panthera onca KP202264 2              | Felis nigripes NCO28309 1             | 0,11372206 |
| Neofelis nebulosa NCO08450 3          | Leopardus pardalis NCO28315 1         | 0,11374263 |
| Panthera tigris NCO10642 35           | Catopuma badia NCO28300 1             | 0,11379293 |
| Neofelis nebulosa NCO08450 3          | Leptailurus serval NCO28316 1         | 0,11381019 |
| Panthera uncia KP202269 1             | Otocolobus manul NCO28323 1           | 0,11385672 |
| Prionailurus bengalensis NCO28301 12  | Panthera uncia NCO10638 1             | 0,11385672 |
| Profelis aurata NCO28299 1            | Panthera uncia NCO10638 1             | 0,11385672 |
| Panthera onca KP202264 2              | Leopardus jacobita NCO28322 1         | 0,11385837 |
| Panthera tigris NCO10642 35           | Leptailurus serval NCO28316 1         | 0,11385994 |
| Panthera pardus japonensis KJ866876 8 | Catopuma temminckii NCO27115 41       | 0,11392405 |
| Panthera uncia KP202269 1             | Leopardus tigrinus NCO28317 1         | 0,11392921 |
| Pardofelis marmorata NLN3 2           | Panthera leo spelaea KX258452 2       | 0,11403951 |
| Urva semitorquata MH464789 1          | Helogale parvula SRR7637809 1         | 0,11405871 |
| Panthera uncia NCO10638 1             | Leopardus wiedii NCO28318 1           | 0,11406038 |
| Phoca fasciata NCO08428 1             | Monachus schauinslandi NCO08421 1     | 0,11407153 |
| Panthera leo spelaea KX258452 2       | Felis chaus NCO28307 1                | 0,11410853 |
| Profelis aurata NCO28299 1            | Panthera tigris amoyensis NCO14770 2  | 0,11412909 |
| Panthera tigris NCO10642 35           | Felis chaus NCO28307 1                | 0,11412919 |
| Panthera uncia NCO10638 1             | Leopardus colocolo NCO28314 1         | 0,11413946 |
| Neofelis nebulosa NCO08450 3          | Felis nigripes NCO28309 1             | 0,1141459  |
| Panthera uncia KP202269 1             | Lynx canadensis NCO28313 1            | 0,11419337 |
| Suricata suricatta SSM10 1            | Urva semitorquata MH464789 1          | 0,11419337 |
| Panthera tigris NCO10642 35           | Catopuma temminckii NCO27115 41       | 0,1141964  |
| Pardofelis marmorata NLN3 2           | Panthera pardus NCO10641 5            | 0,11421785 |
| Panthera uncia NCO10638 1             | Felis catus NCO01700 2                | 0,1142607  |
| Pardofelis marmorata NLN3 2           | Panthera pardus japonensis KJ866876 8 | 0,1142607  |
| Panthera tigris NCO10642 35           | Lynx canadensis NCO28313 1            | 0,11426342 |
| Profelis aurata NCO28299 1            | Panthera tigris NCO10642 35           | 0,11426375 |
| Prionailurus planiceps KY682741 4     | Neofelis nebulosa NCO08450 3          | 0,11428094 |
| Panthera leo NERO 19                  | Acinonyx jubatus NCO05212 3           | 0,11429977 |
| Panthera onca NCO2842 1               | Acinonyx jubatus NCO05212 3           | 0,11434437 |
| Panthera leo NERO 19                  | Felis nigripes NCO28309 1             | 0,11435611 |
| Panthera uncia NCO10638 1             | Leopardus geoffroyi NCO28320 1        | 0,11439718 |
| Panthera tigris amoyensis NCO14770 2  | Caracal caracal NCO28306 1            | 0,11439892 |
| Panthera tigris NCO10642 35           | Lynx rufus NCO14456 3                 | 0,11439908 |
| Profelis aurata NCO28299 1            | Panthera leo spelaea KX258452 2       | 0,11446615 |
| Prionailurus bengalensis CKM45 20     | Panthera uncia NCO10638 1             | 0,11446635 |
| Suricata suricatta SSM10 1            | Cynictis penicillata T375 1           | 0,11453003 |
| Panthera uncia KP202269 1             | Lynx pardinus NCO28319 161            | 0,11459736 |
| Pusa sibirica NCO08432 2              | Mirounga leonina NCO08422 1           | 0,11459736 |
| Helogale parvula SRR7637809 1         | Galerella sanguinea T378 1            | 0,11460569 |
| Panthera tigris amoyensis NCO14770 2  | Felis catus NCO01700 2                | 0,11466763 |
| Panthera tigris amoyensis NCO14770 2  | Acinonyx jubatus NCO05212 3           | 0,11467905 |
| Prionailurus planiceps NCO28312 6     | Panthera tigris amoyensis NCO14770 2  | 0,11473505 |
| Enhydra lutris NCO09692 1             | Aonyx cinerea NCO35814 2              | 0,11474527 |
| Prionailurus viverrinus NCO28305 1    | Neofelis nebulosa NCO08450 3          | 0,11475382 |
| Martes pennanti NCO20664 16           | Martes foina NCO20643 1               | 0,11475861 |
| Panthera tigris amoyensis NCO14770 2  | Catopuma temminckii NCO27115 41       | 0,11480219 |
| Puma yagouaroundi NCO28311 1          | Panthera tigris NCO10642 35           | 0,11480318 |
| Neofelis nebulosa NCO08450 3          | Leopardus wiedii NCO28318 1           | 0,11482005 |

|                                     |                                     |            |
|-------------------------------------|-------------------------------------|------------|
| Zalophus californianus NCO08416 1   | Genetta servalina NCO24568 2        | 0,18304656 |
| Ursus thibetanus mupinensis NCO0875 | Arctocepalus forsteri NCO40023 28   | 0,1830474  |
| Zalophus californianus NCO08416 1   | Prionailurus rubiginosus NCO28304 2 | 0,18304974 |
| Ursus americanus JX196366 3         | Martes zibellina NCO11579 39        | 0,18304986 |
| Melurus ursinus NCO09970 2          | Homotherium latidens MF871702 3     | 0,18305728 |
| Prionailurus viverrinus NCO28305 1  | Gulo gulo NCO09685 3                | 0,18306012 |
| Paradoxurus jerdoni MH464793 1      | Ommatophoca rossii AY377287etc 1    | 0,18306021 |
| Mustela erminea T305 2              | Cuon alpinus NCO13445 3             | 0,18306324 |
| Otocolobus manul NCO28323 1         | Eumetopias jubatus NCO4030 10       | 0,18306413 |
| Phoca fasciata NCO08428 1           | Cynogale bennetti KY117544 1        | 0,18306819 |
| Lutra lutra LC050126 1              | Eupleres goudotii D128 1            | 0,18306939 |
| Martes americana NCO20642 1         | Fossa fossana D350 1                | 0,1830698  |
| Mustela itatsi NCO34330 19          | Fossa fossana D350 1                | 0,18307105 |
| Neophoca cinerea NCO08419 1         | Melogale moschata V0735A 1          | 0,18307182 |
| Vulpes ferrilata NCO27935 1         | Pusa sibirica NCO08432 2            | 0,18307284 |
| Vulpes zerdia KJ603240 1            | Pusa caspica NCO08431 1             | 0,18307428 |
| Lycyon pictus NCO28427 2            | Homotherium latidens MF871702 3     | 0,18307607 |
| Martes melampus NCO09678 1          | Galerella sanguinea T378 1          | 0,18307671 |
| Vulpes corsac NCO23958 1            | Salanoia concolor D378 1            | 0,18307701 |
| Prionodon linsang ERR2391707 1      | Mustela erminea T305 2              | 0,18307723 |
| Tremarctos ornatus NCO09969 2       | Aonyx cinerea NCO35814 2            | 0,18307737 |
| Smilodon populator MF871700 1       | Mustela itatsi NCO34330 19          | 0,18307841 |
| Viverra tangalunga MH464792 1       | Canis latrans NCO08093 7            | 0,18307891 |
| Lutra lutra NCO11358 9              | Felis silvestris lybica KP202275 4  | 0,18307985 |
| Ursus maritimus NCO03428 31         | Taxidea taxus NCO20646 1            | 0,18308035 |
| Mustela nivalis T306 5              | Chrotogale owstoni T607 1           | 0,1830806  |
| Meles anakuma NCO09677 1            | Felis catus NCO01700 2              | 0,1830814  |
| Profelis aurata NCO28299 1          | Meles meles T303 3                  | 0,18308225 |
| Lynx canadensis NCO28313 1          | Lutra sumatrana NCO35810 1          | 0,18308318 |
| Mustela sibirica NCO20637 6         | Leopardus tigrinus NCO28317 1       | 0,18308425 |
| Prionailurus planiceps KY682741 4   | Arctocepalus australis MG023139 1   | 0,18308547 |
| Prionailurus planiceps KY682741 4   | Arctocepalus forsteri KT693377 17   | 0,18308549 |
| Martes zibellina NCO11579 39        | Catopuma badia NCO28300 1           | 0,1830865  |
| Mustela moschata KP726273 1         | Felis chaus NCO28307 1              | 0,1830866  |
| Vulpes lagopus NCO26529 3           | Prionailurus rubiginosus NCO28304 2 | 0,18308662 |
| Vulpes ferrilata NCO27935 1         | Prionailurus rubiginosus NCO28304 2 | 0,18308678 |
| Prionailurus viverrinus NCO28305 1  | Melogale moschata KP726273 1        | 0,18308735 |
| Martes zibellina NCO11579 39        | Leptailurus serval NCO28316 1       | 0,18308806 |
| Neophoca cinerea NCO08419 1         | Lynx pardinus NCO28319 161          | 0,18308832 |
| Viverra zibetha T609 1              | Procyon lotor AB462049 4            | 0,18308896 |
| Poecilogale albinucha T602 1        | Paguma larvata PD0511 2             | 0,18309063 |
| Ursus arctos pruinosus MG066703 3   | Mustela eversmannii NCO28013 1      | 0,18309088 |
| Tremarctos ornatus NCO09969 2       | Genetta abyssinica MG489822 1       | 0,18309177 |
| Viverra zibetha T609 1              | Poecilogale albinucha T602 1        | 0,18309203 |
| Felis margarita NCO28308 1          | Aonyx cinerea NCO35814 2            | 0,18309264 |
| Ursus maritimus GU573488 Svalbard   | Genetta servalina NCO24568 2        | 0,18309316 |
| Leopardus geoffroyi NCO28320 1      | Aonyx cinerea NCO35814 2            | 0,18309353 |
| Procyon lotor AB462046 3            | Prionailurus viverrinus NCO28305 1  | 0,18309355 |
| Zalophus wolfebaeki SRR4431565 1    | Ursus arctos EU497665 29            | 0,18309484 |
| Ursus thibetanus langier MH281753 2 | Melogale moschata V0735A 1          | 0,18309535 |
| Mustela eversmannii NCO28013 1      | Genetta abyssinica MG489822 1       | 0,18309782 |
| Leopardus tigrinus NCO28317 1       | Ictonyx striatus T299 1             | 0,18309994 |
| Ursus spelaeus EU327344 13          | Arctocepalus townsendi NCO08420 1   | 0,18310066 |
| Ursus spelaeus NCO11112 8           | Arctocepalus australis MG023139 1   | 0,18310113 |
| Lycyon pictus NCO28427 2            | Arctodus simus NCO11116 1           | 0,18310165 |
| Viverra tangalunga MH464792 1       | Leopardus colocolo NCO28314 1       | 0,18310316 |
| Melogale moschata V0735A 1          | Arctocepalus forsteri NCO40023 28   | 0,18310584 |
| Mungos mungo MCM7 1                 | Canis lupus familiaris NCO0208 1231 | 0,18310601 |
| Paradoxurus jerdoni MH464793 1      | Ailuropoda melanoleuca NCO09492 5   | 0,18310736 |
| Canis aureus KT448274 1             | Arctodus simus NCO11116 1           | 0,18310744 |
| Poecilogale albinucha T602 1        | Genetta abyssinica MG489822 1       | 0,18310821 |
| Ursus spelaeus EU327344 13          | Mustela nivalis T306 5              | 0,18310969 |
| Leopardus tigrinus NCO28317 1       | Chrysocyon brachyurus NCO24172 1    | 0,18311064 |
| Prionailurus planiceps KY682741 4   | Chrysocyon brachyurus NCO24172 1    | 0,18311153 |
| Vulpes zerdia KJ603240 1            | Monachus monachus NCO44972 5        | 0,18311438 |
| Zalophus californianus NCO08416 1   | Lynx canadensis NCO28313 1          | 0,18311453 |
| Melurus ursinus NCO09970 2          | Arctocepalus forsteri NCO40023 28   | 0,18311928 |
| Prionodon linsang ERR2391707 1      | Canis lupus chanco NCO10340 4       | 0,18311946 |
| Panthera leo NERO 19                | Mustela erminea T305 2              | 0,18311988 |
| Gulo gulo NCO09685 3                | Genetta servalina NCO24568 2        | 0,18312028 |
| Viverra zibetha T609 1              | Ursus americanus JX196366 3         | 0,18312599 |
| Martes flavigula NCO12141 3         | Galerella sanguinea T378 1          | 0,18312626 |
| Martes flavigula NCO12141 3         | Felis nigripes NCO28309 1           | 0,1831301  |
| Paradoxurus hermaphroditus NLNC 1   | Cuon alpinus NCO13445 3             | 0,18313068 |
| Civettictis civetta NCO33378 1      | Arctocepalus pusillus NCO08417 1    | 0,18313271 |
| Nasua nasua NCO20647 1              | Aonyx cinerea NCO35814 2            | 0,18313684 |
| Melogale moschata KP726273 1        | Urva semitorquata MH464789 1        | 0,18313755 |
| Mustela sibirica AP017394 11        | Urva javanica T413 1                | 0,18313988 |
| Ursus maritimus NCO03428 31         | Martes flavigula NCO12141 3         | 0,18314086 |
| Mungos mungo/gambianus SRR77048     | Arctocepalus gazella BK010918 1     | 0,18314137 |
| Nyctereutes procyonoides NCO13700 3 | Fossa fossana D350 1                | 0,18314138 |
| Vulpes zerdia KJ603240 1            | Nandinia binotata NCO24567 1        | 0,18314311 |
| Meles meles T303 3                  | Canis anthus NCO27956 2             | 0,18314321 |
| Martes melampus NCO09678 1          | Genetta servalina NCO24568 2        | 0,18314458 |
| Mustela putorius NCO20638 4         | Canis anthus NCO27956 2             | 0,18314573 |
| Pardofelis marmorata NLN3 2         | Enhydra lutris NCO09692 1           | 0,18314801 |
| Lutra lutra LC050126 1              | Leopardus tigrinus NCO28317 1       | 0,18314849 |
| Meles meles T303 3                  | Genetta genetta T297 1              | 0,18315075 |
| Ursus thibetanus mupinensis NCO0875 | Arctocepalus australis MG023139 1   | 0,18315142 |
| Meles anakuma NCO09677 1            | Catopuma temminckii NCO27115 41     | 0,1831516  |
| Otocolobus manul NCO28323 1         | Lutra sumatrana NCO35810 1          | 0,18315205 |
| Mustela eversmannii NCO28013 1      | Leptailurus serval NCO28316 1       | 0,1831529  |
| Leopardus wiedii NCO28318 1         | Arctocepalus australis MG023139 1   | 0,18315481 |
| Martes americana NCO20642 1         | Caracal caracal NCO28306 1          | 0,18315499 |
| Martes americana NCO20642 1         | Leopardus geoffroyi NCO28320 1      | 0,18315527 |
| Viverricula indica KX891745 1       | Procyon lotor AB462049 4            | 0,18315598 |
| Ursus maritimus NCO03428 31         | Ailurus fulgens NCO11124 1          | 0,1831561  |
| Martes martes T302 3                | Ichneumia albicauda T603 1          | 0,18315691 |
| Caracal caracal NCO28306 1          | Canis latrans NCO08093 7            | 0,1831571  |
| Procyon lotor AB462049 4            | Lynx canadensis NCO28313 1          | 0,18315735 |
| Vulpes zerdia KJ603240 1            | Prionailurus bengalensis CKM45 20   | 0,18315792 |
| Tremarctos ornatus NCO09969 2       | Arctocepalus forsteri NCO40023 28   | 0,18315816 |
| Poecilogale albinucha T602 1        | Lynx lynx NCO27083 4                | 0,18315905 |



|                                       |                                       |            |
|---------------------------------------|---------------------------------------|------------|
| Panthera onca KP202264 2              | Catopuma temminckii NC027115 41       | 0,11486668 |
| Panthera tigris NC010642 35           | Leopardus guigna NC028321 1           | 0,11493972 |
| Panthera onca KP202264 2              | Acinonyx jubatus NC005212 3           | 0,11494492 |
| Neofelis nebulosa NC008450 3          | Lynx lynx NC027083 4                  | 0,11495237 |
| Neofelis nebulosa NC008450 3          | Lynx canadensis NC028313 1            | 0,11495264 |
| Neofelis nebulosa NC008450 3          | Felis catus NC001700 2                | 0,11495375 |
| Pusa caspica NC008431 1               | Mirounga leonina NC008422 1           | 0,11500134 |
| Panthera tigris amoyensis NC014770 2  | Otocolobus manu NC028323 1            | 0,11500478 |
| Panthera uncia NC010638 1             | Leopardus guigna NC028321 1           | 0,11507058 |
| Ichneumia albicauda T603 1            | Helogale parvula SRR7637809 1         | 0,11507766 |
| Speothos venaticus C48 2              | Lycalopex sechurae KT448284 1         | 0,11507893 |
| Pusa hispida NC 008433 1              | Mirounga angustirostris SRR10331586 1 | 0,11508188 |
| Panthera pardus NC010641 5            | Otocolobus manu NC028323 1            | 0,11509279 |
| Panthera leo spelaea KX258452 2       | Felis nigripes NC028309 1             | 0,11511973 |
| Panthera uncia NC010638 1             | Felis margarita NC028308 1            | 0,115136   |
| Prionailurus planiceps KY682741 4     | Panthera uncia NC010638 1             | 0,115136   |
| Pusa sibirica NC008432 1              | Mirounga angustirostris SRR10331586 1 | 0,11529728 |
| Neofelis nebulosa NC008450 3          | Felis margarita NC028308 1            | 0,11529092 |
| Viverra tangalunga MH464792 1         | Mustela frenata NC020640 1            | 0,11529142 |
| Mungos mungo MMC7 1                   | Urva javanica/auropunctata NC006835 1 | 0,11530624 |
| Panthera leo spelaea KX258452 2       | Catopuma temminckii NC027115 41       | 0,11532141 |
| Phoca largha NC008430 1               | Mirounga leonina NC008422 1           | 0,11534639 |
| Urva javanica/auropunctata NC006835 1 | Helogale parvula SRR7637809 1         | 0,11537123 |
| Martes pennanti NC020664 16           | Martes flavigula NC012141 3           | 0,11539831 |
| Panthera uncia NC010638 1             | Felis nigripes NC028309 1             | 0,11540534 |
| Prionailurus rubiginosus NC028304 2   | Panthera uncia NC010638 1             | 0,11540534 |
| Suricata suricatta SSM10 1            | Bdeogale nigripes GLC15 1             | 0,11540534 |
| Mungos mungo MMC7 1                   | Urva javanica T413 1                  | 0,11540655 |
| Panthera tigris amoyensis NC014770 2  | Leopardus guigna NC028321 1           | 0,11541098 |
| Panthera pardus japonensis KJ866876 8 | Acinonyx jubatus NC005212 3           | 0,11541616 |
| Panthera pardus japonensis KJ866876 8 | Otocolobus manu NC028323 1            | 0,11542767 |
| Panthera uncia NC010638 1             | Leopardus jacobita NC028322 1         | 0,11547399 |
| Phoca groenlandica NC008429 54        | Mirounga angustirostris SRR10331586 1 | 0,11548741 |
| Mirounga leonina NC008422 1           | Halichoerus grypus NC001602 2         | 0,11550284 |
| Panthera pardus NC010641 5            | Acinonyx jubatus NC005212 3           | 0,11550811 |
| Panthera uncia NC010638 1             | Lynx rufus NC014456 3                 | 0,11560733 |
| Pusa hispida NC 008433 1              | Monachus schauinslandi NC008421 1     | 0,11562131 |
| Mungos mungo/gambianus SRR7704821 1   | Urva javanica T413 1                  | 0,11567466 |
| Prionailurus planiceps NC028312 6     | Panthera uncia NC010638 1             | 0,11567466 |
| Panthera tigris amoyensis NC014770 2  | Felis margarita NC028308 1            | 0,1156777  |
| Prionailurus planiceps NC028312 6     | Neofelis nebulosa NC008450 3          | 0,11569503 |
| Neofelis nebulosa NC008450 3          | Catopuma temminckii NC027115 41       | 0,11569517 |
| Panthera leo NERO 19                  | Otocolobus manu NC028323 1            | 0,11570224 |
| Phoca vitulina NC001325 1             | Mirounga leonina NC008422 1           | 0,11575067 |
| Monachus monachus NC004972 5          | Cystophora cristata NC008427 1        | 0,11577519 |
| Phoca fasciata NC008428 1             | Monachus monachus NC004972 5          | 0,11577892 |
| Panthera tigris NC010642 35           | Felis silvestris lycina KP202275 4    | 0,11581217 |
| Prionailurus planiceps KY682741 4     | Panthera tigris NC010642 35           | 0,11581236 |
| Mungos mungo/gambianus SRR7704821 1   | Urva javanica/auropunctata NC006835 1 | 0,11584351 |
| Mirounga leonina NC008422 1           | Cystophora cristata NC008427 1        | 0,11587622 |
| Panthera uncia NC010638 1             | Leptailurus serval NC028316 1         | 0,11587665 |
| Puma concolor NC016470 22             | Neofelis nebulosa NC008450 3          | 0,1159646  |
| Neofelis nebulosa NC008450 3          | Catopuma badia NC028300 1             | 0,11603248 |
| Neofelis nebulosa NC008450 3          | Leopardus geoffroyi NC028320 1        | 0,11603481 |
| Neofelis nebulosa NC008450 3          | Leopardus guigna NC028321 1           | 0,11603494 |
| Phoca groenlandica NC008429 54        | Monachus monachus NC004972 5          | 0,11604822 |
| Suricata suricatta SSM10 1            | Attilax paludinosus T606 1            | 0,11607864 |
| Panthera tigris NC010642 35           | Caracal caracal NC028306 1            | 0,11608211 |
| Smilodon populator MF871700 1         | Prionailurus bengalensis CKM45 20     | 0,11612315 |
| Prionailurus planiceps NC028312 6     | Panthera tigris NC010642 35           | 0,1161491  |
| Helogale parvula SRR7637809 1         | Attilax paludinosus T606 1            | 0,11621331 |
| Panthera tigris NC010642 35           | Otocolobus manu NC028323 1            | 0,11621692 |
| Phoca groenlandica NC008429 54        | Monachus schauinslandi NC008421 1     | 0,11622678 |
| Pusa caspica NC008431 1               | Monachus schauinslandi NC008421 1     | 0,1162906  |
| Pusa hispida NC 008433 1              | Monachus monachus NC004972 5          | 0,11631893 |
| Panthera tigris amoyensis NC014770 2  | Felis nigripes NC028309 1             | 0,11635078 |
| Suricata suricatta SSM10 1            | Ichneumia albicauda T603 1            | 0,11635794 |
| Prionailurus viverrinus NC028305 1    | Panthera uncia NC010638 1             | 0,11641726 |
| Panthera uncia NC010638 1             | Catopuma temminckii NC027115 41       | 0,11648263 |
| Pardofelis marmorata NLN3 2           | Panthera uncia NC010638 1             | 0,11648263 |
| Puma yagouaroundi NC028311 1          | Panthera uncia NC010638 1             | 0,11648263 |
| Suricata suricatta SSM10 1            | Galerella sanguinea T378 1            | 0,11649118 |
| Pusa sibirica NC008432 2              | Monachus schauinslandi NC008421 1     | 0,11649283 |
| Xenogale naso C07XAR110 1             | Helogale parvula SRR7637809 1         | 0,11654996 |
| Mungos mungo MMC7 1                   | Urva brachyura KY117547 1             | 0,11655141 |
| Pardofelis marmorata NLN3 2           | Panthera tigris amoyensis NC014770 2  | 0,11655321 |
| Monachus schauinslandi NC008421 1     | Cystophora cristata NC008427 1        | 0,116559   |
| Helogale parvula SRR7637809 1         | Cynictis penicillata T375 1           | 0,11661729 |
| Suricata suricatta SSM10 1            | Xenogale naso C07XAR110 1             | 0,11661729 |
| Smilodon populator MF871700 1         | Leptailurus serval NC028316 1         | 0,11665657 |
| Panthera leo spelaea KX258452 2       | Otocolobus manu NC028323 1            | 0,11666876 |
| Viverricula indica KX891751 1         | Genetta servalina NC024568 2          | 0,11669248 |
| Pusa caspica NC008431 1               | Mirounga angustirostris SRR10331586 1 | 0,11669339 |
| Phoca fasciata NC008428 1             | Ommatophoca rossii AY377287etc 1      | 0,1168273  |
| Viverra tangalunga MH464792 1         | Neovison vison NC020641 3             | 0,1168437  |
| Phoca largha NC008430 1               | Monachus schauinslandi NC008421 1     | 0,11690599 |
| Pusa sibirica NC008432 2              | Monachus monachus NC004972 5          | 0,11692128 |
| Panthera uncia NC010638 1             | Lynx lynx NC027083 4                  | 0,11695395 |
| Panthera tigris NC010642 35           | Felis margarita NC028308 1            | 0,11695696 |
| Smilodon populator MF871700 1         | Puma concolor NC016470 22             | 0,11707385 |
| Pusa hispida NC 008433 1              | Ommatophoca rossii AY377287etc 1      | 0,11708092 |
| Panthera uncia NC010638 1             | Leopardus tigrinus NC028317 1         | 0,1170901  |
| Viverricula indica NC025296 2         | Genetta servalina NC024568 2          | 0,11709905 |
| Panthera uncia KP202269 1             | Acinonyx jubatus NC005212 3           | 0,11709958 |
| Neofelis nebulosa NC008450 3          | Lynx pardinus NC028319 161            | 0,11710787 |
| Pardofelis marmorata NLN3 2           | Panthera tigris NC010642 35           | 0,11722677 |
| Ommatophoca rossii AY377287etc 1      | Cystophora cristata NC008427 1        | 0,11724197 |
| Smilodon populator MF871700 1         | Prionailurus bengalensis NC028301 12  | 0,11726377 |
| Panthera uncia NC010638 1             | Otocolobus manu NC028323 1            | 0,1172906  |
| Panthera tigris NC010642 35           | Felis catus NC001700 2                | 0,11729348 |
| Panthera tigris NC010642 35           | Felis nigripes NC028309 1             | 0,11729363 |
| Smilodon populator MF871700 1         | Leopardus wiedii NC028318 1           | 0,11742043 |
| Neofelis nebulosa NC008450 3          | Lynx rufus NC014456 3                 | 0,11744661 |

|                                       |                                      |            |
|---------------------------------------|--------------------------------------|------------|
| Pardofelis marmorata NLN3 2           | Mustela nivalis T306 5               | 0,18316138 |
| Poecilogale albinucha T602 1          | Genetta genetta T297 1               | 0,18316151 |
| Lynx rufus NC014456 3                 | Lyaon pictus NC028427 2              | 0,18316559 |
| Zalophus wollebaeki SRR4431565 1      | Genetta servalina NC024568 2         | 0,18316562 |
| Lyaon pictus NC028427 2               | Leopardus pardalis NC028315 1        | 0,18316574 |
| Mustela itatzi NC034330 19            | Arctictis binturong T605 2           | 0,18316637 |
| Ursus thibetanus mupinensis NC00875   | Felis margarita NC028308 1           | 0,18316688 |
| Mustela nivalis T306 5                | Canis adustus KT448271 1             | 0,18316799 |
| Leopardus colocolo NC028314 1         | Ailurus fulgens NC011124 1           | 0,18317017 |
| Viverra tangalunga MH464792 1         | Ursus thibetanus thibetanus NC011118 | 0,18317163 |
| Viverra tangalunga MH464792 1         | Ursus spelaeus NC011112 8            | 0,18317193 |
| Helarctos malayanus NC009968 2        | Bassariscus sumichrasti SRX1099089 1 | 0,18317291 |
| Ursus arctos AP012576 6               | Arctocepalus pusillus NC008417 1     | 0,18317367 |
| Ursus spelaeus NC011112 8             | Bassariscus sumichrasti SRX1099089 1 | 0,18317384 |
| Viverricula indica KX891745 1         | Ursus spelaeus EU327344 13           | 0,18317389 |
| Cynictis penicillata T375 1           | Canis lupus familiaris NC002008 1231 | 0,18317546 |
| Mephitis mephitis NC020648 1          | Genetta servalina NC024568 2         | 0,18317696 |
| Viverra tangalunga MH464792 1         | Canis lupus familiaris NC002008 1231 | 0,18317876 |
| Prionailurus bengalensis NC028301 12  | Chrysocyon brachyurus NC024172 1     | 0,18317957 |
| Ursus thibetanus laniger MH281753 2   | Catopuma temminckii NC027115 41      | 0,18318063 |
| Ursus americanus JX196366 3           | Fossa fossana D350 1                 | 0,18318065 |
| Ursus americanus JX196366 3           | Martes melampus NC009678 1           | 0,18318318 |
| Ursus spelaeus EU327344 13            | Acinonyx jubatus NC005212 3          | 0,18318862 |
| Ursus thibetanus thibetanus NC011118  | Canis adustus KT448271 1             | 0,18318906 |
| Viverra tangalunga MH464792 1         | Canis lupus chanco NC010340 4        | 0,18318947 |
| Gulo gulo NC009685 3                  | Felis margarita NC028308 1           | 0,18319141 |
| Ursus thibetanus thibetanus NC011118  | Canis aureus KT448274 1              | 0,18319145 |
| Taxidea taxus NC020646 1              | Panthera pardus NC010641 5           | 0,18319871 |
| Mungos mungo MMC7 1                   | Lutra sumatrana NC035810 1           | 0,18320246 |
| Smilodon populator MF871700 1         | Martes martes T302 3                 | 0,18320335 |
| Meles anakuma NC009677 1              | Ura semitorquata MH464789 1          | 0,18320386 |
| Smilodon populator MF871700 1         | Martes melampus NC009678 1           | 0,18320499 |
| Vulpes ferrilata NC027935 1           | Pusa caspica NC008431 1              | 0,1832076  |
| Mungotictis decemlineata NC027828     | Lutra sumatrana NC035810 1           | 0,18320778 |
| Urocyon littoralis catalinae KP129018 | Pusa sibirica NC008432 2             | 0,18320845 |
| Fossa fossana D350 1                  | Arctocepalus gazella BK010918 1      | 0,18320848 |
| Vulpes zerda KJ603240 1               | Pusa sibirica NC008432 2             | 0,18320869 |
| Homotherium latidens MF871702 3       | Cuon alpinus NC013445 3              | 0,18320926 |
| Cynictis penicillata T375 1           | Canis anthus NC027956 2              | 0,18320951 |
| Viverricula indica KX891745 1         | Martes melampus NC009678 1           | 0,1832104  |
| Taxidea taxus NC020646 1              | Bdeogale nigripes GLC15 1            | 0,18321276 |
| Mustela sibirica NC020637 6           | Canis anthus NC027956 2              | 0,18321294 |
| Meles anakuma NC009677 1              | Leopardus pardalis T262 1            | 0,18321404 |
| Mustela evermannii NC028013 1         | Canis aureus KT448274 1              | 0,18321511 |
| Paguma larvata PDS511 2               | Melogale moschata KP726273 1         | 0,18321519 |
| Pardofelis marmorata NLN3 2           | Arctonyx collaris NC020645 1         | 0,18321574 |
| Prionailurus planiceps NC028312 6     | Callorhinus ursinus NC008415 1       | 0,18321714 |
| Ursus maritimus NC003428 31           | Martes melampus NC009678 1           | 0,18321727 |
| Meles anakuma NC009677 1              | Genetta genetta T297 1               | 0,18321794 |
| Leopardus colocolo NC028314 1         | Eumetopias jubatus NC004030 10       | 0,18321848 |
| Mustela itatzi NC034330 19            | Felis catus NC001700 2               | 0,18321946 |
| Viverra tangalunga MH464792 1         | Paradoxurus hermaphroditus NC03959   | 0,18321948 |
| Ursus maritimus GU573488 Svalbard     | Arctocepalus gazella BK010918 1      | 0,18321994 |
| Vulpes corsac NC023958 1              | Leopardus pardalis T262 1            | 0,18322036 |
| Prionailurus planiceps NC028312 6     | Arctocepalus australis MGO23139 1    | 0,18322037 |
| Vulpes zerda KJ603240 1               | Lynx lynx NC027083 4                 | 0,18322068 |
| Ursus maritimus GU573488 Svalbard     | Lynx rufus NC014456 3                | 0,18322127 |
| Martes americana NC020642 1           | Canis aureus KT448274 1              | 0,18322161 |
| Phocarcos hookeri NC008418 1          | Lynx pardinus NC028319 161           | 0,18322274 |
| Meles meles T303 3                    | Canis aureus KT448274 1              | 0,18322466 |
| Procyon lotor AB462049 4              | Felis catus NC001700 2               | 0,18322562 |
| Ursus arctos isabellinus 1885 2       | Mustela itatzi NC034330 19           | 0,18322614 |
| Procyon lotor AB462049 4              | Prionailurus planiceps NC028312 6    | 0,18322667 |
| Lutra sumatrana NC035810 1            | Genetta abyssinica MG489822 1        | 0,18322757 |
| Proteles cristata T393 6              | Mustela erminea T305 2               | 0,18322876 |
| Prionailurus viverrinus NC028305 1    | Martes pennanti NC020664 16          | 0,1832289  |
| Ursus arctos GU573486 5               | Neophoca cinerea NC008419 1          | 0,1832298  |
| Mustela nivalis T306 5                | Catopuma badia NC028300 1            | 0,1832315  |
| Procyon lotor AB462046 3              | Leopardus colocolo NC028314 1        | 0,18323188 |
| Ursus thibetanus mupinensis NC00875   | Lynx rufus NC014456 3                | 0,18323217 |
| Ursus arctos GU573486 5               | Melogale moschata NC020644 1         | 0,18323296 |
| Halichoerus grypus NC001602 2         | Cuon alpinus NC013445 3              | 0,18323359 |
| Mungos mungo MMC7 1                   | Eumetopias jubatus NC004030 10       | 0,18323499 |
| Viverra zibetha T609 1                | Canis mesomelas KT448280 1           | 0,18323824 |
| Lyaon pictus NC028427 2               | Caracal caracal NC028306 1           | 0,18323873 |
| Ursus spelaeus EU327344 13            | Genetta servalina NC024568 2         | 0,18324117 |
| Canis lupus familiaris NC002008 1231  | Attilax paludinosus T606 1           | 0,18324228 |
| Ursus thibetanus formosanus NC0093    | Poecilogale albinucha T602 1         | 0,1832429  |
| Mustela nivalis T306 5                | Helarctos malayanus NC009968 2       | 0,18324366 |
| Ursus thibetanus thibetanus NC011118  | Lynx canadensis NC028313 1           | 0,18324442 |
| Genetta abyssinica MG489822 1         | Chrysocyon brachyurus NC024172 1     | 0,18325031 |
| Zalophus californianus NC008416 1     | Prionailurus planiceps KY682741 4    | 0,18325212 |
| Canis aureus KT448274 1               | Arctictis binturong T605 2           | 0,18325263 |
| Smilodon populator MF871700 1         | Poecilogale albinucha T602 1         | 0,18325293 |
| Lycalopex sechurae KT448284 1         | Caracal caracal NC028306 1           | 0,18325298 |
| Panthera uncia NC010638 1             | Monachus monachus NC004972 5         | 0,18325315 |
| Viverricula indica NC025296 2         | Gulo gulo NC009685 3                 | 0,18325543 |
| Spilogale putorius NC010497 1         | Martes zibellina NC011579 39         | 0,18325827 |
| Panthera pardus NC010641 5            | Mustela kathiah NC023210 1           | 0,18325838 |
| Prionailurus planiceps NC028312 6     | Canis lupus chanco NC010340 4        | 0,18326117 |
| Ommatophoca rossii AY377287etc 1      | Bassariscus neblina SRX1097850 1     | 0,18326406 |
| Viverricula indica KX891751 1         | Cuon alpinus NC013445 3              | 0,18326534 |
| Viverricula indica NC025296 2         | Cuon alpinus NC013445 3              | 0,18326664 |
| Potos flavus T414 1                   | Chrotogale owstoni T607 1            | 0,18326731 |
| Mungos mungo/gambianus SRR7704821 1   | Enhydra lutris NC009692 1            | 0,18326814 |
| Viverricula indica NC025296 2         | Tapirus terrestris T358              | 0,18326962 |
| Meles anakuma NC009677 1              | Fossa fossana D350 1                 | 0,18326992 |
| Meles leucurus NC039173 4             | Ura semitorquata MH464789 1          | 0,18327121 |
| Prionodon pardicolor NC024569 2       | Halichoerus grypus NC001602 2        | 0,18327272 |
| Prionailurus bengalensis CKM45 20     | Tapirus terrestris T358              | 0,18327302 |
| Salanoia concolor D378 1              | Lutra lutra NC01358 9                | 0,18327309 |
| Mustela nigripes NC024942 1           | Mungos mungo MMC7 1                  | 0,18327372 |
| Fossa fossana D350 1                  | Arctocepalus townsendi NC008420 1    | 0,18327372 |

|                                       |                                       |            |
|---------------------------------------|---------------------------------------|------------|
| Puma yagouaroundi NC028311 1          | Neofelis nebulosa NC008450 3          | 0,11744683 |
| Hemigalus derbyanus MH464791 1        | Cynogale bennetti KY117544 1          | 0,11748588 |
| Helogale parvula SRR7637809 1         | Deogale nigripes GLC15 1              | 0,11749259 |
| Lutrologale perspicillata NC035811 1  | Enhydra lutris NC009692 1             | 0,11757115 |
| Neofelis nebulosa NC008450 3          | Leopardus jacobita NC028322 1         | 0,11758284 |
| Pusa caspica NC008431 1               | Monachus monachus NC044972 5          | 0,11766217 |
| Mirounga angustirostris SRR10331586 1 | Cystophora cristata NC008427 1        | 0,11770387 |
| Profelis aurata NC028299 1            | Neofelis nebulosa NC008450 3          | 0,11778325 |
| Panthera leo spelaea KK258452 2       | Acinonyx jubatus NC005212 3           | 0,11782512 |
| Phoca vitulina NC001325 1             | Monachus schauinslandi NC008421 1     | 0,11784873 |
| Smilodon populator MF871700 1         | Profelis aurata NC028299 1            | 0,11790703 |
| Smilodon populator MF871700 1         | Caracal caracal NC028306 1            | 0,11795842 |
| Phoca vitulina NC001325 1             | Mirounga angustirostris SRR10331586 1 | 0,1180492  |
| Phoca largha NC008430 1               | Monachus monachus NC044972 5          | 0,11807487 |
| Phoca groenlandica NC008429 54        | Ommatophoca rossii AY377287etc 1      | 0,11813055 |
| Smilodon populator MF871700 1         | Prionailurus rubiginosus NC028304 2   | 0,11813725 |
| Mungos mungo/gambianus SRR7704821 1   | Urva brachyura KY117547 1             | 0,1181659  |
| Viverricula indica XK891745 1         | Genetta servalina NC024568 2          | 0,11817386 |
| Phoca largha NC008430 1               | Mirounga angustirostris SRR10331586 1 | 0,11818356 |
| Otocolobus manu NC028323 1            | Neofelis nebulosa NC008450 3          | 0,11818799 |
| Smilodon populator MF871700 1         | Leopardus pardalis NC028315 1         | 0,11826344 |
| Phoca vitulina NC001325 1             | Monachus monachus NC044972 5          | 0,11834411 |
| Paradoxurus hermaphroditus NLNC 1     | Hemigalus derbyanus MH464791 1        | 0,11834554 |
| Panthera uncia NC010638 1             | Lynx canadensis NC028313 1            | 0,11843523 |
| Viverra zibetha T609 1                | Genetta servalina NC024568 2          | 0,11851054 |
| Neofelis nebulosa NC008450 3          | Leopardus tigrinus NC028317 1         | 0,11852452 |
| Monachus monachus NC044972 5          | Halichoerus grypus NC001602 2         | 0,1186348  |
| Panthera uncia NC010638 1             | Lynx pardinus NC028319 161            | 0,11870455 |
| Phoca vitulina NC001325 1             | Ommatophoca rossii AY377287etc 1      | 0,11870546 |
| Smilodon populator MF871700 1         | Leopardus geoffroyi NC028320 1        | 0,11876641 |
| Genetta servalina NC024568 2          | Civettictis civetta GLC19 1           | 0,11877988 |
| Mirounga angustirostris SRR10331586 1 | Halichoerus grypus NC001602 2         | 0,11881244 |
| Smilodon populator MF871700 1         | Leopardus colocolo NC028314 1         | 0,11885156 |
| Neofelis nebulosa NC008450 3          | Caracal caracal NC028306 1            | 0,11886060 |
| Paradoxurus jerdoni MH464793 1        | Hemigalus derbyanus MH464791 1        | 0,1188942  |
| Urva brachyura KY117547 1             | Helogale parvula SRR7637809 1         | 0,11890654 |
| Phoca largha NC008430 1               | Ommatophoca rossii AY377287etc 1      | 0,11893807 |
| Suricata suricatta SSM10 1            | Urva javanica/auropunctata NC006835 1 | 0,11894092 |
| Pusa caspica NC008431 1               | Ommatophoca rossii AY377287etc 1      | 0,11906636 |
| Urva javanica T413 1                  | Helogale parvula SRR7637809 1         | 0,11910854 |
| Neofelis nebulosa NC008450 3          | Leopardus colocolo NC028314 1         | 0,11914361 |
| Monachus schauinslandi NC008421 1     | Halichoerus grypus NC001602 2         | 0,11915152 |
| Pardofelis marmorata NLN3 2           | Neofelis nebulosa NC008450 3          | 0,11919705 |
| Smilodon populator MF871700 1         | Felis nigripes NC028309 1             | 0,11925292 |
| Smilodon populator MF871700 1         | Leopardus pardalis T262 1             | 0,11945143 |
| Smilodon populator MF871700 1         | Felis chaus NC028307 1                | 0,11948252 |
| Genetta servalina NC024568 2          | Civettictis civetta NC033378 1        | 0,1195465  |
| Viverra zibetha T609 1                | Genetta abyssinica MG489822 1         | 0,11958573 |
| Pusa sibirica NC008432 2              | Ommatophoca rossii AY377287etc 1      | 0,11959648 |
| Paradoxurus hermaphroditus NC039591 1 | Hemigalus derbyanus MH464791 1        | 0,11960472 |
| Mustela erminea T305 2                | Lutra lutra LC050126 1                | 0,11972979 |
| Smilodon populator MF871700 1         | Otocolobus manu NC028323 1            | 0,11973116 |
| Smilodon populator MF871700 1         | Prionailurus viverrinus NC028305 1    | 0,11978362 |
| Viverricula indica NC025296 2         | Genetta abyssinica MG489822 1         | 0,11979228 |
| Ommatophoca rossii AY377287etc 1      | Halichoerus grypus NC001602 2         | 0,11984851 |
| Viverricula indica XK891751 1         | Paradoxurus hermaphroditus NLNC 1     | 0,11985725 |
| Smilodon populator MF871700 1         | Felis margarita NC028308 1            | 0,11998111 |
| Mustela erminea T305 2                | Lutra sumatrana NC035810 1            | 0,11999912 |
| Viverricula indica XK891745 1         | Genetta abyssinica MG489822 1         | 0,1200556  |
| Smilodon populator MF871700 1         | Acinonyx jubatus NC005212 3           | 0,12014836 |
| Smilodon populator MF871700 1         | Felis silvestris lybica KP202275 4    | 0,12018841 |
| Galidictis fasciata DM333 1           | Fossa fossana D350 1                  | 0,12025534 |
| Smilodon populator MF871700 1         | Catopuma badia NC028300 1             | 0,12027574 |
| Martes pennanti NC020664 16           | Gulo gulo NC009685 3                  | 0,12037399 |
| Smilodon populator MF871700 1         | Lynx pardinus NC028319 161            | 0,12039947 |
| Suricata suricatta SSM10 1            | Urva javanica T413 1                  | 0,12045516 |
| Smilodon populator MF871700 1         | Leopardus jacobita NC028322 1         | 0,12047716 |
| Smilodon populator MF871700 1         | Leopardus tigrinus NC028317 1         | 0,12053693 |
| Smilodon populator MF871700 1         | Catopuma temminckii NC027115 41       | 0,12062305 |
| Smilodon populator MF871700 1         | Homotherium latidens MF871702 3       | 0,12064341 |
| Cynogale bennetti KY117544 1          | Chrotogale owstoni T607 1             | 0,12075836 |
| Viverricula indica XK891751 1         | Genetta abyssinica MG489822 1         | 0,12080223 |
| Smilodon populator MF871700 1         | Puma yagouaroundi NC028311 1          | 0,12099345 |
| Smilodon populator MF871700 1         | Leopardus guigna NC028321 1           | 0,12099367 |
| Paguma larvata PDD511 2               | Genetta servalina NC024568 2          | 0,12100195 |
| Prionailurus bengalensis CKM45 20     | Homotherium latidens MF871702 3       | 0,12120473 |
| Panthera uncia NC010638 1             | Acinonyx jubatus NC005212 3           | 0,1212071  |
| Mustela erminea T305 2                | Enhydra lutris NC009692 1             | 0,12121085 |
| Hemigalus derbyanus MH464791 1        | Arctictis binturong T605 2            | 0,12128204 |
| Smilodon populator MF871700 1         | Felis catus NC001700 2                | 0,12128611 |
| Smilodon populator MF871700 1         | Prionailurus planiceps KY682741 4     | 0,12139397 |
| Viverricula indica XK891745 1         | Paradoxurus hermaphroditus NLNC 1     | 0,12140597 |
| Genetta abyssinica MG489822 1         | Civettictis civetta GLC19 1           | 0,1214995  |
| Suricata suricatta SSM10 1            | Urva brachyura KY117547 1             | 0,12166712 |
| Smilodon populator MF871700 1         | Lynx canadensis NC028313 1            | 0,1217572  |
| Smilodon populator MF871700 1         | Prionailurus planiceps NC028312 6     | 0,12176458 |
| Smilodon populator MF871700 1         | Lynx lynx NC027083 4                  | 0,12180305 |
| Mustela erminea T305 2                | Martes melampus NC009678 1            | 0,12188325 |
| Mustela erminea T305 2                | Lutra lutra NC011358 9                | 0,12188339 |
| Mustela erminea T305 2                | Martes zibellina NC011579 39          | 0,12189041 |
| Salanoia concolor D378 1              | Fossa fossana D350 1                  | 0,12207311 |
| Paguma larvata PDD511 2               | Hemigalus derbyanus MH464791 1        | 0,12209646 |
| Viverricula indica NC025296 2         | Paradoxurus hermaphroditus NLNC 1     | 0,1223493  |
| Viverricula indica NC025296 2         | Hemigalus derbyanus MH464791 1        | 0,1223601  |
| Viverra zibetha T609 1                | Paguma larvata PDD511 2               | 0,122416   |
| Mustela erminea T305 2                | Martes martes T302 3                  | 0,12256348 |
| Viverra zibetha T609 1                | Hemigalus derbyanus MH464791 1        | 0,12260202 |
| Viverricula indica XK891751 1         | Genetta genetta T297 1                | 0,12261823 |
| Genetta abyssinica MG489822 1         | Civettictis civetta NC033378 1        | 0,12262067 |
| Diplogale hosi MH464790 1             | Cynogale bennetti KY117544 1          | 0,12265089 |
| Viverricula indica XK891751 1         | Paradoxurus jerdoni MH464793 1        | 0,12272627 |
| Smilodon populator MF871700 1         | Lynx rufus NC014456 3                 | 0,12286318 |
| Smilodon populator MF871700 1         | Pardofelis marmorata NLN3 2           | 0,12296986 |

|                                        |                                    |            |
|----------------------------------------|------------------------------------|------------|
| Neophoca cinerea NC008419 1            | Mustela kathiah NC023210 1         | 0,18327531 |
| Salanoia concolor D378 1               | Enhydra lutris NC009692 1          | 0,18327598 |
| Vulpes ferrillata NC027935 1           | Mirounga leonina NC008422 1        | 0,18327691 |
| Vulpes vulpes NC008434 5               | Mustela frenata NC020640 1         | 0,18327771 |
| Urocyon cinereoargenteus NC026723 3    | Mirounga leonina NC008422 1        | 0,18327774 |
| Martes foina NC020643 1                | Canis adustus KT448271 1           | 0,18327782 |
| Tremarctos ornatus NC009969 2          | Mustela nigripes NC024942 1        | 0,18327878 |
| Tremarctos ornatus NC009969 2          | Mustela itatsi NC034330 19         | 0,1832791  |
| Gulo gulo NC009685 3                   | Canis adustus KT448271 1           | 0,18327919 |
| Tremarctos ornatus NC009969 2          | Procyon lotor AB462049 4           | 0,18327935 |
| Ommatophoca rossii AY377287etc 1       | Cynictis penicillata T375 1        | 0,18328106 |
| Galerella sanguinea T378 1             | Arctonyx collaris NC020645 1       | 0,18328203 |
| Leopardus tigrinus NC028317 1          | Ailuurus fulgens styani NC009691 1 | 0,18328214 |
| Proteles cristata T393 6               | Halichoerus grypus NC001602 2      | 0,1832841  |
| Mustela nivalis T306 5                 | Conepatus chinga NC042596 1        | 0,18328455 |
| Vulpes zerda KJ603240 1                | Phoca fasciata NC008428 1          | 0,18328506 |
| Lycalon pictus NC028427 2              | Crossarchus platycephalus C7R66 1  | 0,18328583 |
| Mustela altaica NC021751 1             | Canis latrans NC008093 7           | 0,18328595 |
| Mustela itatsi NC034330 19             | Civettictis civetta GLC19 1        | 0,18328699 |
| Mustela sibirica AP017394 11           | Caracal caracal NC028306 1         | 0,18328726 |
| Phoca groenlandica NC008429 54         | Galidia elegans D146 1             | 0,18328755 |
| Melogale moschata KP726273 1           | Felis catus NC001700 2             | 0,1832877  |
| Martes martes T302 3                   | Galerella sanguinea T378 1         | 0,18328826 |
| Leopardus wiedii NC028318 1            | Arctocepalus forsteri KT693377 17  | 0,18328932 |
| Ursus arctos EU497665 29               | Mustela putorius NC020638 4        | 0,18329304 |
| Gulo gulo NC009685 3                   | Civettictis civetta NC033378 1     | 0,18329333 |
| Panthera onca NC022842 1               | Meles meles T303 3                 | 0,18329337 |
| Ursus arctos EU497665 29               | Melogale moschata NC020644 1       | 0,18329424 |
| Puma yagouaroundi NC028311 1           | Martes pennanti NC020664 16        | 0,18329498 |
| Paradoxurus hermaphroditus NLNC 1      | Mustela nivalis T306 5             | 0,18329524 |
| Otocolobus manu NC028323 1             | Arctocepalus pusillus NC008417 1   | 0,1832954  |
| Profelis aurata NC028299 1             | Procyon lotor AB462046 3           | 0,18329556 |
| Prionailurus bengalensis CKM45 20      | Poecilogale albinocha T602 1       | 0,18329911 |
| Otocyon megalotis SAF1 2               | Monachus schauinslandi NC008421 1  | 0,18329942 |
| Mustela sibirica AP017394 11           | Arctocepalus forsteri NC040023 28  | 0,18330021 |
| Zalophus wolfebaeki SRR4431565 1       | Catopuma badia NC028300 1          | 0,18330471 |
| Ursus spelaeus EU327344 13             | Fossa fossana D350 1               | 0,18330623 |
| Smilodon populator MF871700 1          | Gulo gulo NC009685 3               | 0,18330683 |
| Mephitis mephitis NC020648 1           | Arctodus simus NC011116 1          | 0,18330984 |
| Viverricula indica NC025296 2          | Ursus spelaeus NC011112 8          | 0,18331039 |
| Ursus spelaeus EU327344 13             | Poecilogale albinocha T602 1       | 0,18331194 |
| Ommatophoca rossii AY377287etc 1       | Ichneumia albicauda T603 1         | 0,18331313 |
| Ursus thibetanus mupinensis NC008795 7 | Arctictis binturong T605 2         | 0,18331537 |
| Odobenus rosmarus NC004029 29          | Arctodus simus NC011116 1          | 0,18331544 |
| Ursus spelaeus NC011112 8              | Catopuma temminckii NC027115 41    | 0,18331583 |
| Ursus thibetanus laniger MH281753 2    | Catopuma badia NC028300 1          | 0,18331617 |
| Leopardus pardalis NC028315 1          | Canis mesomelas KT448280 1         | 0,18331653 |
| Lynx pardinus NC028319 161             | Lycalopex sechurae KT448284 1      | 0,18331753 |
| Zalophus californianus NC008416 1      | Paguma larvata PDD511 2            | 0,18331887 |
| Ursus americanus JX196366 3            | Melogale moschata KP726273 1       | 0,18332018 |
| Ursus americanus JX196366 3            | Enhydra lutris NC009692 1          | 0,18332197 |
| Zalophus californianus NC008416 1      | Prionailurus bengalensis CKM45 20  | 0,18332367 |
| Prionodens lingsang ERR2391707 1       | Halichoerus grypus NC001602 2      | 0,18332441 |
| Civettictis civetta NC033378 1         | Ailuurus fulgens NC011124 1        | 0,18332656 |
| Zalophus californianus NC008416 1      | Ursus arctos AP012576 6            | 0,18332773 |
| Ursus americanus JX196366 3            | Mustela kathiah NC023210 1         | 0,18332855 |
| Ursus americanus JX196366 3            | Mustela nigripes NC024942 1        | 0,18332949 |
| Martes flavigula NC012141 3            | Canis adustus KT448271 1           | 0,18333042 |
| Chrotogale owstoni T607 1              | Arctocepalus forsteri KT693377 17  | 0,18333286 |
| Mephitis mephitis NC020648 1           | Gulo gulo NC009685 3               | 0,18333688 |
| Arctocepalus townsendi NC008420 1      | Ailuurus fulgens NC011124 1        | 0,18333775 |
| Mustela sibirica AP017394 11           | Arctocepalus australis MGO23139 1  | 0,1833391  |
| Lutra sumatrana NC035810 1             | Eupleres goudoti D128 1            | 0,18333957 |
| Leopardus jacobita NC028322 1          | Tapirus terrestris T358            | 0,18334091 |
| Neophoca cinerea NC008419 1            | Mustela sibirica NC020637 6        | 0,18334195 |
| Neophoca cinerea NC008419 1            | Mustela sibirica AP017394 11       | 0,18334198 |
| Viverra zibetha T609 1                 | Enhydra lutris NC009692 1          | 0,18334287 |
| Ursus maritimus GU573488 Svalbard      | Martes flavigula NC012141 3        | 0,18334296 |
| Potos flavus T414 1                    | Helogale parvula SRR7637809 1      | 0,18334357 |
| Potos flavus T414 1                    | Mungos mungo/gambianus SRR77048    | 0,18334371 |
| Paguma larvata PDD511 2                | Callorhinus ursinus NC008415 1     | 0,18334451 |
| Urocyon littoralis catalinae KP129018  | Mirounga leonina NC008422 1        | 0,183345   |
| Melogale moschata NC020644 1           | Crossarchus platycephalus C7R66 1  | 0,1833452  |
| Mungotictis declivineata NC027828      | Arctonyx collaris NC020645 1       | 0,18334679 |
| Lutrologale perspicillata NC035811 1   | Arctocepalus townsendi NC008420 1  | 0,18334684 |
| Vulpes corsac NC023958 1               | Mustela erminea T305 2             | 0,18334821 |
| Civettictis civetta GLC19 1            | Callorhinus ursinus NC008415 1     | 0,18334864 |
| Meles meles T303 3                     | Ichneumia albicauda T603 1         | 0,18334897 |
| Ursus maritimus GU573488 Svalbard      | Taxidea taxus NC020646 1           | 0,18334961 |
| Prionailurus planiceps KY682741 4      | Meles anakuma NC009677 1           | 0,18335018 |
| Ursus arctos GU573491 207              | Callorhinus ursinus NC008415 1     | 0,18335034 |
| Mustela nivalis T306 5                 | Arctocepalus gazella BK010918 1    | 0,18335082 |
| Vulpes corsac NC023958 1               | Smilodon populator MF871700 1      | 0,18335204 |
| Mustela kathiah NC023210 1             | Diplogale hosi MH464790 1          | 0,18335231 |
| Viverricula indica XK891751 1          | Mustela sibirica NC020637 6        | 0,18335268 |
| Paradoxurus hermaphroditus NLNC 1      | Lycalopex sechurae KT448284 1      | 0,18335281 |
| Pardofelis marmorata NLN3 2            | Lutra sumatrana NC035810 1         | 0,18335356 |
| Ictonyx striatus T299 1                | Arctocepalus forsteri KT693377 17  | 0,18335432 |
| Tremarctos ornatus NC009969 2          | Poecilogale albinocha T602 1       | 0,18335482 |
| Mustela itatsi NC034330 19             | Leptailurus serval NC028316 1      | 0,18335505 |
| Vulpes vulpes NC008434 5               | Felis nigripes NC028309 1          | 0,18335524 |
| Lynx pardinus NC028319 161             | Arctocepalus australis MGO23139 1  | 0,18335563 |
| Vulpes vulpes NC008434 5               | Prionailurus planiceps NC028312 6  | 0,18335563 |
| Mustela eversmannii NC028013 1         | Leopardus guigna NC028321 1        | 0,18335631 |
| Mustela erminea T305 2                 | Hyaena hyaena NC020669 1           | 0,1833566  |
| Lynx rufus NC014456 3                  | Canis latrans NC008093 7           | 0,18335724 |
| Ursus arctos isabellinus 1885 2        | Neophoca cinerea NC008419 1        | 0,18335828 |
| Paradoxurus hermaphroditus NC039591    | Monachus schauinslandi NC008421 1  | 0,18335883 |
| Viverra zibetha T609 1                 | Arctocepalus pusillus NC008417 1   | 0,18335907 |
| Lynx rufus NC014456 3                  | Arctotherium sp NC030174 1         | 0,1833621  |
| Phoca largha NC008430 1                | Paradoxurus jerdoni MH464793 1     | 0,1833622  |
| Poecilogale albinocha T602 1           | Leptailurus serval NC028316 1      | 0,18336242 |
| Paradoxurus jerdoni MH464793 1         | Mustela nivalis T306 5             | 0,18336244 |

|                                       |                                       |            |
|---------------------------------------|---------------------------------------|------------|
| Viverricula indica XK891751 1         | Paguma larvata PDD511 2               | 0,12302202 |
| Neofelis nebulosa NCO08450 3          | Acinonyx jubatus NCO05212 3           | 0,12304734 |
| Viverricula indica XK891751 1         | Paradoxurus hermaphroditus NCO39591 1 | 0,12315669 |
| Viverricula indica XK891745 1         | Genetta genetta T297 1                | 0,12329158 |
| Mungotictis decemlineata NCO27828 1   | Fossa fossana D350 1                  | 0,12335231 |
| Leptailurus serval NCO28316 1         | Homotherium latidens MF871702 3       | 0,12337658 |
| Viverricula indica XK891745 1         | Paguma larvata PDD511 2               | 0,12342604 |
| Genetta genetta T297 1                | Civettictis civetta GLC19 1           | 0,12342636 |
| Prionailurus bengalensis NCO28301 12  | Homotherium latidens MF871702 3       | 0,12355223 |
| Mustela erminea T305 2                | Martes americana NCO20642 1           | 0,12357269 |
| Mustela erminea T305 2                | Martes flavigula NCO12141 3           | 0,1236658  |
| Viverricula indica NCO25296 2         | Genetta genetta T297 1                | 0,12376572 |
| Mustela erminea T305 2                | Martes foina NCO20643 1               | 0,12378042 |
| Viverricula indica NCO25296 2         | Paradoxurus jerdoni MH464793 1        | 0,12383036 |
| Viverricula indica NCO25296 2         | Paguma larvata PDD511 2               | 0,12389894 |
| Viverricula indica XK891745 1         | Paradoxurus jerdoni MH464793 1        | 0,12396472 |
| Viverra zibetha T609 1                | Arctictis binturong T605 2            | 0,12397692 |
| Genetta genetta T297 1                | Civettictis civetta NCO33378 1        | 0,12399235 |
| Fossa fossana D350 1                  | Cryptoprocta ferox CF13 1             | 0,12409792 |
| Smilodon populator MF871700 1         | Panthera leo NERO 19                  | 0,12421898 |
| Paradoxurus jerdoni MH464793 1        | Chrotogale owstoni T607 1             | 0,12422005 |
| Hemigalus derbyanus MH464791 1        | Civettictis civetta GLC19 1           | 0,12425752 |
| Viverricula indica XK891745 1         | Paradoxurus hermaphroditus NCO39591 1 | 0,12436873 |
| Lynx rufus NCO14456 3                 | Homotherium latidens MF871702 3       | 0,12439425 |
| Viverricula indica XK891745 1         | Arctictis binturong T605 2            | 0,12458292 |
| Viverra zibetha T609 1                | Paradoxurus hermaphroditus NLNC 1     | 0,12463807 |
| Viverricula indica XK891751 1         | Arctictis binturong T605 2            | 0,12465006 |
| Viverra zibetha T609 1                | Genetta genetta T297 1                | 0,12470578 |
| Paguma larvata PDD511 2               | Chrotogale owstoni T607 1             | 0,12475952 |
| Lynx pardinus NCO28319 161            | Homotherium latidens MF871702 3       | 0,12479014 |
| Salanoia concolor D378 1              | Eupleres goudotii D128 1              | 0,12490153 |
| Mustela erminea T305 2                | Martes pennanti NCO20664 16           | 0,12492132 |
| Viverricula indica XK891745 1         | Hemigalus derbyanus MH464791 1        | 0,12518542 |
| Smilodon populator MF871700 1         | Panthera pardus NCO10641 5            | 0,12521553 |
| Hemigalus derbyanus MH464791 1        | Genetta servalina NCO24568 2          | 0,12530643 |
| Viverricula indica NCO25296 2         | Paradoxurus hermaphroditus NCO39591 1 | 0,12531167 |
| Smilodon populator MF871700 1         | Panthera pardus japonensis KJ866876 8 | 0,12533127 |
| Paradoxurus hermaphroditus NLNC 1     | Chrotogale owstoni T607 1             | 0,12536396 |
| Smilodon populator MF871700 1         | Panthera tigris NCO10642 35           | 0,12545127 |
| Otocolobus manul NCO28323 1           | Homotherium latidens MF871702 3       | 0,12550452 |
| Hemigalus derbyanus MH464791 1        | Civettictis civetta NCO33378 1        | 0,12550922 |
| Viverra zibetha T609 1                | Paradoxurus jerdoni MH464793 1        | 0,12551343 |
| Leopardus tigrinus NCO28317 1         | Homotherium latidens MF871702 3       | 0,12556565 |
| Leopardus jacobita NCO28322 1         | Homotherium latidens MF871702 3       | 0,12562697 |
| Smilodon populator MF871700 1         | Panthera onca NCO22842 1              | 0,12563597 |
| Paradoxurus hermaphroditus NLNC 1     | Diplogale hosei MH464790 1            | 0,12564659 |
| Lutra lutra LCO50126 1                | Lontra canadensis SRR10409165 1       | 0,12571506 |
| Leopardus pardalis T262 1             | Homotherium latidens MF871702 3       | 0,12572984 |
| Smilodon populator MF871700 1         | Panthera uncia KP202269 1             | 0,12576264 |
| Paguma larvata PDD511 2               | Diplogale hosei MH464790 1            | 0,12577026 |
| Leopardus geoffroyi NCO28320 1        | Homotherium latidens MF871702 3       | 0,12579259 |
| Smilodon populator MF871700 1         | Panthera tigris amoyensis NCO14770 2  | 0,12582147 |
| Leopardus guigna NCO28321 1           | Homotherium latidens MF871702 3       | 0,12583199 |
| Mungotictis decemlineata NCO27828 1   | Eupleres goudotii D128 1              | 0,12584354 |
| Prionailurus viverrinus NCO28305 1    | Homotherium latidens MF871702 3       | 0,12586959 |
| Lontra canadensis SRR10409165 1       | Enhydra lutris NCO09692 1             | 0,12591696 |
| Prionailurus rubiginosus NCO28304 2   | Homotherium latidens MF871702 3       | 0,12591739 |
| Lutra sumatrana NCO35810 1            | Lontra canadensis SRR10409165 1       | 0,12598425 |
| Lynx canadensis NCO28313 1            | Homotherium latidens MF871702 3       | 0,12598515 |
| Genetta servalina NCO24568 2          | Arctictis binturong T605 2            | 0,12599693 |
| Smilodon populator MF871700 1         | Panthera onca KP202264 2              | 0,12607536 |
| Leopardus colocolo NCO28314 1         | Homotherium latidens MF871702 3       | 0,12611377 |
| Viverricula indica XK891751 1         | Hemigalus derbyanus MH464791 1        | 0,12611414 |
| Mustela frenata NCO20640 1            | Lutra sumatrana NCO35810 1            | 0,12612361 |
| Paradoxurus jerdoni MH464793 1        | Diplogale hosei MH464790 1            | 0,12613006 |
| Viverricula indica NCO25296 2         | Arctictis binturong T605 2            | 0,12613279 |
| Paguma larvata PDD511 2               | Genetta abyssinica MG489822 1         | 0,12613352 |
| Smilodon populator MF871700 1         | Panthera leo spelaea KX258452 2       | 0,12613575 |
| Paradoxurus hermaphroditus NCO39591 1 | Chrotogale owstoni T607 1             | 0,12617245 |
| Puma yagouaroundi NCO28311 1          | Homotherium latidens MF871702 3       | 0,1262117  |
| Chrotogale owstoni T607 1             | Arctictis binturong T605 2            | 0,12631948 |
| Homotherium latidens MF871702 3       | Felis chaus NCO28307 1                | 0,12637964 |
| Prionailurus planiceps KY682741 4     | Homotherium latidens MF871702 3       | 0,12638649 |
| Paradoxurus jerdoni MH464793 1        | Genetta servalina NCO24568 2          | 0,12638879 |
| Smilodon populator MF871700 1         | Neofelis nebulosa NCO08450 3          | 0,12639903 |
| Mustela erminea T305 2                | Melogale moschata KP726273 1          | 0,12639928 |
| Homotherium latidens MF871702 3       | Catopuma badia NCO28300 1             | 0,12644921 |
| Gallidictis fasciata DM333 1          | Cryptoprocta ferox CF13 1             | 0,12645467 |
| Viverra zibetha T609 1                | Paradoxurus hermaphroditus NCO39591 1 | 0,12645613 |
| Prionailurus planiceps NCO28312 6     | Homotherium latidens MF871702 3       | 0,12645705 |
| Hemigalus derbyanus MH464791 1        | Genetta abyssinica MG489822 1         | 0,12650274 |
| Lutra lutra NCO11358 9                | Lontra canadensis SRR10409165 1       | 0,12658994 |
| Gallidictis fasciata DM333 1          | Eupleres goudotii D128 1              | 0,12665293 |
| Melogale moschata NCO20644 1          | Martes melampus NCO09678 1            | 0,12666331 |
| Leopardus pardalis NCO28315 1         | Homotherium latidens MF871702 3       | 0,12666376 |
| Paradoxurus hermaphroditus NLNC 1     | Genetta servalina NCO24568 2          | 0,12686014 |
| Civettictis civetta GLC19 1           | Arctictis binturong T605 2            | 0,12687282 |
| Viverricula indica NCO25296 2         | Diplogale hosei MH464790 1            | 0,12692247 |
| Lynx lynx NCO27083 4                  | Homotherium latidens MF871702 3       | 0,12695476 |
| Mustela frenata NCO20640 1            | Lutra lutra LCO50126 1                | 0,1269985  |
| Melogale moschata NCO20644 1          | Martes foina NCO20643 1               | 0,12700573 |
| Paradoxurus hermaphroditus NLNC 1     | Civettictis civetta GLC19 1           | 0,12702616 |
| Melogale moschata NCO20644 1          | Martes zibellina NCO11579 39          | 0,127067   |
| Melogale moschata NCO20644 1          | Martes martes T302 3                  | 0,12707634 |
| Paradoxurus hermaphroditus NCO39591 1 | Diplogale hosei MH464790 1            | 0,12711435 |
| Leopardus wiedii NCO28318 1           | Homotherium latidens MF871702 3       | 0,12715741 |
| Paguma larvata PDD511 2               | Genetta genetta T297 1                | 0,12719727 |
| Panthera leo NERO 19                  | Homotherium latidens MF871702 3       | 0,12721229 |
| Civettictis civetta NCO33378 1        | Arctictis binturong T605 2            | 0,12730283 |
| Neovison vison NCO20641 3             | Lutra sumatrana NCO35810 1            | 0,12733865 |
| Puma concolor NCO16470 22             | Homotherium latidens MF871702 3       | 0,12734319 |
| Salanoia concolor D378 1              | Cryptoprocta ferox CF13 1             | 0,12746438 |
| Melogale moschata V0735A 1            | Martes melampus NCO09678 1            | 0,12746483 |

|                                        |                                       |            |
|----------------------------------------|---------------------------------------|------------|
| Prionailurus viverrinus NCO28305 1     | Poecilogale albinucha T602 1          | 0,18336253 |
| Ursus maritimus GU573488 Svalbard      | Martes martes T302 3                  | 0,18336421 |
| Otocyon megalotis SAF 1 2              | Lynx rufus NCO14456 3                 | 0,18336447 |
| Mustela nivalis T306 5                 | Felis margarita NCO28308 1            | 0,18336448 |
| Zalophus wolfebaeki SRR4431565 1       | Mustela nivalis T306 5                | 0,18336704 |
| Zalophus wolfebaeki SRR4431565 1       | Civettictis civetta GLC19 1           | 0,18337004 |
| Prionodon pardicolor NCO24569 2        | Monachus schauinslandi NCO08421 1     | 0,18337084 |
| Ursus arctos GU573486 5                | Mustela nivalis T306 5                | 0,18337165 |
| Paradoxurus hermaphroditus NCO39591 1  | Canis aureus KT448274 1               | 0,18337211 |
| Otaria byronia OTAB 1                  | Melursus ursinus NCO09970 2           | 0,18337287 |
| Lycalopex sechurae KT448284 1          | Leopardus wiedii NCO28318 1           | 0,18337293 |
| Zalophus wolfebaeki SRR4431565 1       | Leopardus geoffroyi NCO28320 1        | 0,18337423 |
| Smilodon populator MF871700 1          | Martes flavigula NCO12141 3           | 0,18337491 |
| Leptailurus serval NCO28316 1          | Chrysocyon brachyurus NCO24172 1      | 0,18337627 |
| Smilodon populator MF871700 1          | Procyon lotor AB462049 3              | 0,18337631 |
| Ursus arctos pruinosus MG066703 3      | Neovison vison NCO20641 3             | 0,18337645 |
| Mustela erminea T305 2                 | Lycalopex sechurae KT448284 1         | 0,18337719 |
| Ursus thibetanus formosanus NCO0933 1  | Caracal caracal NCO28306 1            | 0,18337955 |
| Leopardus pardalis T262 1              | Helarctos malayanus NCO09968 2        | 0,18337989 |
| Zalophus californianus NCO08416 1      | Viverricula indica XK891745 1         | 0,18338315 |
| Ursus thibetanus thibetanus NCO11118 1 | Leopardus guigna NCO28321 1           | 0,18338403 |
| Ursus spelaeus NCO11112 8              | Smilodon populator MF871700 1         | 0,1833865  |
| Melogale moschata KP726273 1           | Civettictis civetta NCO33378 1        | 0,18338677 |
| Zalophus californianus NCO08416 1      | Leopardus wiedii NCO28318 1           | 0,18338735 |
| Martes martes T302 3                   | Canis lupus chanco NCO10340 4         | 0,18338796 |
| Smilodon populator MF871700 1          | Canis anthus NCO27956 2               | 0,18339039 |
| Ursus americanus JX196366 3            | Martes foina NCO20643 1               | 0,18340215 |
| Urva semitorquata MH464789 1           | Enhydra lutris NCO09692 1             | 0,18340428 |
| Paguma larvata PDD511 2                | Lutra lutra LCO50126 1                | 0,18340577 |
| Mustela putorius NCO20638 4            | Mungos mungo MMC7 1                   | 0,1834074  |
| Viverra tangalunga MH464792 1          | Urva semitorquata MH464789 1          | 0,1834088  |
| Mungotictis decemlineata NCO27828 1    | Melogale moschata KP726273 1          | 0,18341066 |
| Taxidea taxus NCO20646 1               | Paradoxurus hermaphroditus NCO39591 1 | 0,18341079 |
| Vulpes lagopus NCO26529 3              | Nandinia binotata NCO24567 1          | 0,18341099 |
| Ursus americanus JX196366 3            | Arctictis binturong T605 2            | 0,18341121 |
| Otaria byronia OTAB 1                  | Crossarchus platycephalus C7R66 1     | 0,18341209 |
| Vulpes zerda KJ603240 1                | Mirounga leonina NCO08422 1           | 0,18341234 |
| Leopardus pardalis T262 1              | Tapirus terrestris T358               | 0,18341322 |
| Urva semitorquata MH464789 1           | Bassariscus sumichrasti SRX1090989 1  | 0,18341334 |
| Xenogale naso C07XAR110 1              | Canis adustus KT448271 1              | 0,18341444 |
| Vulpes vulpes NCO08434 5               | Mustela erminea T305 2                | 0,18341509 |
| Lutrogale perspicillata NCO35811 1     | Arctocephalus gazella BK010918 1      | 0,18341669 |
| Ursus arctos isabellinus 1885 2        | Callorhinus ursinus NCO08415 1        | 0,18341716 |
| Leopardus jacobita NCO28322 1          | Ailuurs fulgens NCO11124 1            | 0,18341726 |
| Prionailurus planiceps NCO28312 6      | Meles anakuma NCO09677 1              | 0,18341726 |
| Felis silvestris lybica KP202275 4     | Ailuurs fulgens NCO11124 1            | 0,18341839 |
| Civettictis civetta GLC19 1            | Arctocephalus gazella BK010918 1      | 0,18341915 |
| Mustela sibirica NCO20637 6            | Arctotherium sp NCO30174 1            | 0,1834193  |
| Ursus arctos EU497665 29               | Martes melampus NCO09678 1            | 0,18341941 |
| Felis chaus NCO28307 1                 | Ailuurs fulgens NCO11124 1            | 0,18341979 |
| Ursus arctos isabellinus 1885 2        | Martes zibellina NCO11579 39          | 0,18342046 |
| Mustela sibirica NCO20637 6            | Leptailurus serval NCO28316 1         | 0,18342218 |
| Prionodon pardicolor NCO24569 2        | Meles anakuma NCO09677 1              | 0,18342221 |
| Ursus americanus JX196366 3            | Genetta abyssinica MG489822 1         | 0,18342228 |
| Vulpes corsac NCO23958 1               | Phoca vitulina NCO01325 1             | 0,18342268 |
| Vulpes ferrilata NCO27935 1            | Leopardus pardalis T262 1             | 0,18342288 |
| Martes zibellina NCO11579 39           | Catopuma temminckii NCO27115 41       | 0,18342294 |
| Vulpes vulpes NCO08434 5               | Leopardus tigrinus NCO28317 1         | 0,183423   |
| Vulpes zerda KJ603240 1                | Lynx pardinus NCO28319 161            | 0,18342347 |
| Melogale moschata KP726273 1           | Leptailurus serval NCO28316 1         | 0,18342349 |
| Vulpes vulpes NCO08434 5               | Otocolobus manul NCO28323 1           | 0,18342361 |
| Lycyon pictus NCO28427 2               | Cynictis penicillata T375 1           | 0,18342362 |
| Ictonyx striatus T299 1                | Arctocephalus gazella BK010918 1      | 0,18342367 |
| Salanoia concolor D378 1               | Neovison vison NCO20641 3             | 0,18342391 |
| Zalophus wolfebaeki SRR4431565 1       | Smilodon populator MF871700 1         | 0,18342425 |
| Mustela sibirica AP017394 11           | Lycyon pictus NCO28427 2              | 0,18342565 |
| Neovison vison NCO20641 3              | Canis anthus NCO27956 2               | 0,18342596 |
| Mustela altaica NCO21751 1             | Arctotherium sp NCO30174 1            | 0,18342607 |
| Ursus maritimus GU573488 Svalbard      | Arctocyon collaris NCO20645 1         | 0,18342699 |
| Ursus arctos isabellinus 1885 2        | Martes martes T302 3                  | 0,18342759 |
| Lynx rufus NCO14456 3                  | Bassariscus sumichrasti SRX1090989 1  | 0,18342841 |
| Viverricula indica XK891751 1          | Mustela nivalis T306 5                | 0,18342899 |
| Panthera tigris NCO10642 35            | Callorhinus ursinus NCO08415 1        | 0,18342926 |
| Prionailurus planiceps NCO28312 6      | Martes pennanti NCO20664 16           | 0,18342933 |
| Puma yagouaroundi NCO28311 1           | Procyon lotor AB462049 3              | 0,18342941 |
| Procyon lotor AB462046 3               | Caracal caracal NCO28306 1            | 0,18342957 |
| Prionailurus bengalensis NCO28301 12   | Arctocephalus pusillus NCO08417 1     | 0,18342969 |
| Martes pennanti NCO20664 16            | Catopuma temminckii NCO27115 41       | 0,18343002 |
| Leopardus geoffroyi NCO28320 1         | Arctocephalus pusillus NCO08417 1     | 0,18343076 |
| Ursus arctos pruinosus MG066703 3      | Ailuurs fulgens styani NCO09691 1     | 0,18343247 |
| Ursus thibetanus thibetanus NCO11118 1 | Lutra lutra NCO11358 9                | 0,18343258 |
| Ursus maritimus GU573488 Svalbard      | Mustela nivalis T306 5                | 0,18343273 |
| Prionailurus bengalensis CKM45 20      | Melogale moschata NCO20644 1          | 0,18343298 |
| Suricata suricatta SSM10 1             | Ommatophoca rossii AY377287etc 1      | 0,18343307 |
| Lycalopex sechurae KT448284 1          | Genetta servalina NCO24568 2          | 0,18343489 |
| Zalophus wolfebaeki SRR4431565 1       | Paguma larvata PDD511 2               | 0,18343645 |
| Canis anthus NCO27956 2                | Arctictis binturong T605 2            | 0,18343689 |
| Lycalopex sechurae KT448284 1          | Leopardus pardalis T262 1             | 0,18343751 |
| Zalophus wolfebaeki SRR4431565 1       | Lynx pardinus NCO28319 161            | 0,18343858 |
| Leopardus geoffroyi NCO28320 1         | Canis aureus KT448274 1               | 0,1834392  |
| Zalophus wolfebaeki SRR4431565 1       | Otocolobus manul NCO28323 1           | 0,18343925 |
| Speothos venaticus C48 2               | Mirounga angustirostris SRR10331586   | 0,18343961 |
| Zalophus wolfebaeki SRR4431565 1       | Prionailurus bengalensis NCO28301 12  | 0,18344009 |
| Poecilogale albinucha T602 1           | Arctictis binturong T605 2            | 0,18344118 |
| Martes melampus NCO09678 1             | Canis lupus familiaris NCO02008 1231  | 0,18344155 |
| Smilodon populator MF871700 1          | Mustela altaica NCO21751 1            | 0,18344155 |
| Ursus thibetanus formosanus NCO0933 1  | Otaria byronia OTAB 1                 | 0,18344177 |
| Mungos mungo MMC7 1                    | Canis lupus chanco NCO10340 4         | 0,18344186 |
| Civettictis civetta GLC19 1            | Chrysocyon brachyurus NCO24172 1      | 0,18344362 |
| Martes zibellina NCO11579 39           | Canis lupus familiaris NCO02008 1231  | 0,18344437 |
| Helarctos malayanus NCO09968 2         | Genetta genetta T297 1                | 0,18344526 |
| Ursus thibetanus formosanus NCO0933 1  | Felis chaus NCO28307 1                | 0,18344583 |
| Paguma larvata PDD511 2                | Helarctos malayanus NCO09968 2        | 0,1834476  |

|                                        |                                    |            |
|----------------------------------------|------------------------------------|------------|
| Panthera onca NC022842 1               | Homotherium latidens MF871702 3    | 0,12757204 |
| Homotherium latidens MF871702 3        | Felis margarita NC028308 1         | 0,1275928  |
| Melogale moschata KP726273 1           | Martes melampus NC009678 1         | 0,12759943 |
| Melogale moschata V0735A 1             | Martes foina NC020643 1            | 0,12760527 |
| Mustela erminea T305 2                 | Aonyx cinerea NC035814 2           | 0,12761182 |
| Paradoxurus jerdoni MH464793 1         | Genetta abyssinica MG489822 1      | 0,12762125 |
| Mustela erminea T305 2                 | Melogale moschata NC020644 1       | 0,12767817 |
| Panthera onca KP202264 2               | Homotherium latidens MF871702 3    | 0,12767838 |
| Homotherium latidens MF871702 3        | Acinonyx jubatus NC005212 3        | 0,12771998 |
| Profelis aurata NC028299 1             | Homotherium latidens MF871702 3    | 0,12772791 |
| Homotherium latidens MF871702 3        | Felis silvestris lybica KP202275 4 | 0,12776919 |
| Homotherium latidens MF871702 3        | Caracal caracal NC028306 1         | 0,12779881 |
| Paguma larvata PDD511 2                | Civettictis civetta GLC19 1        | 0,12780285 |
| Mustela nigripes NC024942 1            | Enhydra lutris NC009692 1          | 0,12780699 |
| Melogale moschata KP726273 1           | Martes foina NC020643 1            | 0,12780729 |
| Melogale moschata V0735A 1             | Martes martes T302 3               | 0,12781055 |
| Mustela putorius NC020638 4            | Enhydra lutris NC009692 1          | 0,12784728 |
| Melogale moschata NC020644 1           | Martes americana NC020642 1        | 0,12784751 |
| Martes flavigula NC012141 3            | Lutra sumatrana NC035810 1         | 0,12797642 |
| Melogale moschata V0735A 1             | Martes zibellina NC011579 39       | 0,12800322 |
| Mustela frenata NC020640 1             | Enhydra lutris NC009692 1          | 0,128143   |
| Melogale moschata KP726273 1           | Martes martes T302 3               | 0,12821439 |
| Melogale moschata KP726273 1           | Lutra sumatrana NC035810 1         | 0,12827243 |
| Mustela itatsi NC034330 19             | Enhydra lutris NC009692 1          | 0,12827787 |
| Panthera uncia KP202269 1              | Homotherium latidens MF871702 3    | 0,12831178 |
| Galidia elegans D146 1                 | Fossa fossana D350 1               | 0,12833452 |
| Mustela frenata NC020640 1             | Lutra lutra NC011358 9             | 0,12834451 |
| Mustela altaica NC021751 1             | Martes melampus NC009678 1         | 0,12835054 |
| Diplogale hosi MH464790 1              | Civettictis civetta GLC19 1        | 0,12844037 |
| Melogale moschata KP726273 1           | Martes zibellina NC011579 39       | 0,12847432 |
| Mustela nigripes NC024942 1            | Martes melampus NC009678 1         | 0,12847936 |
| Diplogale hosi MH464790 1              | Arctictis binturong T605 2         | 0,12849426 |
| Mustela erminea T305 2                 | Ictonyx striatus T299 1            | 0,12856328 |
| Paguma larvata PDD511 2                | Civettictis civetta NC033378 1     | 0,12857017 |
| Homotherium latidens MF871702 3        | Felis nigripes NC028309 1          | 0,12859359 |
| Paradoxurus hermaphroditus NC039591 1  | Genetta servalina NC024568 2       | 0,12861086 |
| Smilodon populator MF871700 1          | Panthera uncia NC010638 1          | 0,12866794 |
| Eupleres goudoti D128 1                | Cryptoprocta ferox CFC13 1         | 0,12867826 |
| Mustela sibirica NC020637 6            | Enhydra lutris NC009692 1          | 0,12868191 |
| Mustela sibirica AP017394 11           | Enhydra lutris NC009692 1          | 0,128682   |
| Viverricula indica XK891751 1          | Diplogale hosi MH464790 1          | 0,12868801 |
| Homotherium latidens MF871702 3        | Felis catus NC001700 2             | 0,12868854 |
| Neovison vison NC020641 3              | Enhydra lutris NC009692 1          | 0,12869066 |
| Neovison vison NC020641 3              | Melogale moschata NC020644 1       | 0,1286916  |
| Mungotictis decemlineata NC027828 1    | Cryptoprocta ferox CFC13 1         | 0,1288107  |
| Mustela altaica NC021751 1             | Enhydra lutris NC009692 1          | 0,12882262 |
| Neovison vison NC020641 3              | Martes flavigula NC012141 3        | 0,12884991 |
| Melogale moschata KP726273 1           | Enhydra lutris NC009692 1          | 0,12887812 |
| Mustela sibirica NC020637 6            | Martes melampus NC009678 1         | 0,12888326 |
| Neovison vison NC020641 3              | Lutra lutra LC050126 1             | 0,12888668 |
| Mustela altaica NC021751 1             | Lutra lutra LC050126 1             | 0,12888914 |
| Mustela altaica NC021751 1             | Martes zibellina NC011579 39       | 0,12889431 |
| Melogale moschata V0735A 1             | Martes americana NC020642 1        | 0,12895453 |
| Melogale moschata NC020644 1           | Enhydra lutris NC009692 1          | 0,12895215 |
| Martes martes T302 3                   | Lutra sumatrana NC035810 1         | 0,1289542  |
| Genetta abyssinica MG489822 1          | Arctictis binturong T605 2         | 0,12907486 |
| Paradoxurus hermaphroditus NLNC 1      | Civettictis civetta NC033378 1     | 0,12910819 |
| Mustela nigripes NC024942 1            | Martes flavigula NC012141 3        | 0,12912056 |
| Martes melampus NC009678 1             | Lutra sumatrana NC035810 1         | 0,12921461 |
| Melogale moschata KP726273 1           | Martes americana NC020642 1        | 0,12921461 |
| Paradoxurus hermaphroditus NLNC 1      | Genetta genetta T297 1             | 0,129217   |
| Ursus thibetanus thibetanus NC011118 4 | Arctodus simus NC011116 1          | 0,12922782 |
| Martes flavigula NC012141 3            | Lutra lutra LC050126 1             | 0,12925565 |
| Viverricula indica NC025296 2          | Chrotogale owstoni T607 1          | 0,12927376 |
| Mustela sibirica AP017394 11           | Martes melampus NC009678 1         | 0,12928711 |
| Mustela eversmanni NC028013 1          | Enhydra lutris NC009692 1          | 0,12928778 |
| Panthera pardus japonensis KJ866876 8  | Homotherium latidens MF871702 3    | 0,12930225 |
| Homotherium latidens MF871702 3        | Catopuma temminckii NC027115 41    | 0,1293024  |
| Ursus thibetanus mupinensis NC008753 2 | Arctodus simus NC011116 1          | 0,12935331 |
| Mustela putorius NC020638 4            | Martes melampus NC009678 1         | 0,12935434 |
| Mustela sibirica AP017394 11           | Martes martes T302 3               | 0,12936427 |
| Mustela frenata NC020640 1             | Martes flavigula NC012141 3        | 0,12938687 |
| Neovison vison NC020641 3              | Arctonyx collaris NC020645 1       | 0,12942721 |
| Poecilogale albinucha T602 1           | Mustela erminea T305 2             | 0,12943478 |
| Martes flavigula NC012141 3            | Lutra lutra NC011358 9             | 0,12945858 |
| Paradoxurus hermaphroditus NLNC 1      | Genetta abyssinica MG489822 1      | 0,12951311 |
| Viverra zibetha T609 1                 | Chrotogale owstoni T607 1          | 0,12954254 |
| Mustela erminea T305 2                 | Melogale moschata V0735A 1         | 0,12956285 |
| Viverricula indica XK891745 1          | Diplogale hosi MH464790 1          | 0,12956387 |
| Mustela altaica NC021751 1             | Martes foina NC020643 1            | 0,12957297 |
| Mustela frenata NC020640 1             | Melogale moschata KP726273 1       | 0,12962995 |
| Mustela frenata NC020640 1             | Melogale moschata NC020644 1       | 0,1296304  |
| Mustela sibirica NC020637 6            | Martes martes T302 3               | 0,12963346 |
| Mustela erminea T305 2                 | Gulo gulo NC009685 3               | 0,12965974 |
| Civettictis civetta GLC19 1            | Chrotogale owstoni T607 1          | 0,12967919 |
| Paradoxurus jerdoni MH464793 1         | Civettictis civetta GLC19 1        | 0,12968823 |
| Mustela nigripes NC024942 1            | Lutra sumatrana NC035810 1         | 0,12969095 |
| Mustela altaica NC021751 1             | Martes americana NC020642 1        | 0,12970167 |
| Melogale moschata KP726273 1           | Lutra lutra LC050126 1             | 0,12975301 |
| Pardofelis marmorata NLN3 2            | Homotherium latidens MF871702 3    | 0,12975444 |
| Martes pennanti NC020664 16            | Enhydra lutris NC009692 1          | 0,12976302 |
| Mustela nivalis T306 5                 | Enhydra lutris NC009692 1          | 0,12976517 |
| Neovison vison NC020641 3              | Melogale moschata KP726273 1       | 0,12976831 |
| Mustela nigripes NC024942 1            | Martes americana NC020642 1        | 0,12983128 |
| Paradoxurus hermaphroditus NC039591 1  | Civettictis civetta GLC19 1        | 0,12989025 |
| Mustela nigripes NC024942 1            | Martes martes T302 3               | 0,12990256 |
| Mustela altaica NC021751 1             | Martes martes T302 3               | 0,12990861 |
| Viverra zibetha T609 1                 | Diplogale hosi MH464790 1          | 0,12994885 |
| Neovison vison NC020641 3              | Lutra lutra NC011358 9             | 0,12996332 |
| Viverricula indica XK891745 1          | Chrotogale owstoni T607 1          | 0,13001248 |
| Melogale moschata NC020644 1           | Lutra sumatrana NC035810 1         | 0,13002895 |
| Ursus thibetanus formosanus NC009331 1 | Arctodus simus NC011116 1          | 0,13003102 |
| Ursus thibetanus laniger MH281753 2    | Arctodus simus NC011116 1          | 0,13003547 |

|                                        |                                      |            |
|----------------------------------------|--------------------------------------|------------|
| Ursus thibetanus formosanus NC009331 1 | Catopuma temminckii NC027115 41      | 0,1834486  |
| Lutra lutra LC050126 1                 | Civettictis civetta NC033378 1       | 0,18344863 |
| Canis mesomelas KT448280 1             | Arctictis binturong T605 2           | 0,18344928 |
| Ursus thibetanus formosanus NC009331 1 | Arctocepalus forsteri NC004023 28    | 0,18345103 |
| Zalophus californianus NC008416 1      | Felis margarita NC028308 1           | 0,18345331 |
| Panthera tigris amoyensis NC014770 2   | Ommatophoca rossii AY377287etc 1     | 0,18345398 |
| Zalophus californianus NC008416 1      | Viverricula indica NC025296 2        | 0,18345445 |
| Melogale moschata NC020644 1           | Canis adustus KT448271 1             | 0,18345526 |
| Mustela altaica NC021751 1             | Canis lupus chanco NC010340 4        | 0,18345779 |
| Lutrogale perspicillata NC035811 1     | Eumetopias jubatus NC004030 10       | 0,18345849 |
| Martes flavigula NC012141 3            | Lycaon pictus NC028427 2             | 0,18345886 |
| Ursus americanus JX196366 3            | Lutra sumatrana NC035810 1           | 0,18345976 |
| Ommatophoca rossii AY377287etc 1       | Canis mesomelas KT448280 1           | 0,18346362 |
| Ursus americanus JX196366 3            | Martes americana NC020642 1          | 0,18346362 |
| Eumetopias jubatus NC004030 10         | Catopuma badia NC028300 1            | 0,18346725 |
| Mustela altaica NC021751 1             | Diplogale hosi MH464790 1            | 0,18346737 |
| Genetta servalina NC024568 2           | Eumetopias jubatus NC004030 10       | 0,18346745 |
| Mustela sibirica NC020637 6            | Arctocepalus forsteri KT693377 17    | 0,18347375 |
| Mungotictis decemlineata NC027828 1    | Lutra lutra NC011358 9               | 0,18347533 |
| Cynogale bennetti KY117544 1           | Arctonyx collaris NC020645 1         | 0,18347631 |
| Viverra tangalunga MH464792 1          | Phocarcus hookeri NC008418 1         | 0,18347658 |
| Prionodon linsang ERR2391707 1         | Miouranga leonina NC008422 1         | 0,18347697 |
| Mungotictis decemlineata NC027828 1    | Martes americana NC020642 1          | 0,18347737 |
| Mustela kathiah NC023210 1             | Cynogale bennetti KY117544 1         | 0,18347737 |
| Vulpes vulpes NC008434 5               | Crossarchus platycephalus C7R66 1    | 0,18347778 |
| Ursus arctos EU497665 29               | Eumetopias jubatus NC004030 10       | 0,18347789 |
| Ursus spelaeus NC011112 8              | Genetta abyssinica MG489822 1        | 0,1834784  |
| Urocyon cinereoargenteus NC026723 2    | Erginathus barbatus NC008426 1       | 0,18347853 |
| Tremarctos ornatus NC009969 2          | Meles anakuma NC009677 1             | 0,18347889 |
| Viverra zibetha T609 1                 | Lutra sumatrana NC035810 1           | 0,18348303 |
| Viverricula indica NC025296 2          | Martes melampus NC009678 1           | 0,18348365 |
| Zalophus wolfebaeki SRR4431565 1       | Chrotogale owstoni T607 1            | 0,18348433 |
| Ursus arctos EU497665 29               | Taxidea taxus NC020646 1             | 0,18348449 |
| Mustela nivalis T306 5                 | Mungos mungo MMC7 1                  | 0,18348522 |
| Felis catus NC001700 2                 | Arctonyx collaris NC020645 1         | 0,18348543 |
| Martes pennanti NC020664 16            | Galidictis fasciata DM333 1          | 0,18348643 |
| Neophoca cinerea NC008419 1            | Mustela nivalis T306 5               | 0,18348692 |
| Vulpes lagopus NC026529 3              | Viverricula indica XK891751 1        | 0,18348692 |
| Panthera uncia KP202269 1              | Mustela kathiah NC023210 1           | 0,18348761 |
| Speothos venaticus C48 2               | Pusa caspica NC008431 1              | 0,18348819 |
| Mustela putorius NC020638 4            | Felis catus NC001700 2               | 0,18348862 |
| Homotherium latidens MF871702 3        | Arctocepalus australis MG023139 1    | 0,18348868 |
| Potos flavus T414 1                    | Lynx canadensis NC028313 1           | 0,18348894 |
| Ursus maritimus NC003428 31            | Arctocepalus gazella BK010918 1      | 0,18348926 |
| Mustela sibirica AP017394 11           | Leptailurus serval NC028316 1        | 0,18348947 |
| Prionailurus viverrinus NC028305 1     | Mustela itatsi NC034330 19           | 0,18348964 |
| Vulpes vulpes NC008434 5               | Felis catus NC001700 2               | 0,18348974 |
| Viverricula indica XK891745 1          | Melogale moschata NC020644 1         | 0,1834898  |
| Vulpes corsac NC023958 1               | Phoca largha NC008430 1              | 0,1834898  |
| Procyon lotor AB462049 4               | Otaria byronia OTAB 1                | 0,18348986 |
| Vulpes vulpes NC008434 5               | Lynx canadensis NC028313 1           | 0,18349001 |
| Paguma larvata PDD511 2                | Mustela altaica NC021751 1           | 0,18349098 |
| Vulpes zerda KJ603240 1                | Catopuma temminckii NC027115 41      | 0,18349135 |
| Ursus thibetanus mupinensis NC008753 2 | Salanoia concolor D378 1             | 0,18349147 |
| Martes americana NC020642 1            | Leopardus tigrinus NC028317 1        | 0,18349177 |
| Catopuma temminckii NC027115 41        | Ailuurus fulgens styani NC009691 1   | 0,18349214 |
| Lynx rufus NC014456 3                  | Arctocepalus pusillus NC008417 1     | 0,18349403 |
| Smilodon populator MF871700 1          | Neovison vison NC020641 3            | 0,18349424 |
| Ursus maritimus NC003428 31            | Arctonyx collaris NC020645 1         | 0,18349427 |
| Procyon lotor AB462049 4               | Lynx rufus NC014456 3                | 0,18349454 |
| Homotherium latidens MF871702 3        | Galictis vittata T412 1              | 0,1834947  |
| Procyon lotor AB462049 4               | Lynx rufus NC014456 3                | 0,18349482 |
| Martes pennanti NC020664 16            | Genetta genetta T297 1               | 0,18349509 |
| Viverricula indica XK891745 1          | Mustela nivalis T306 5               | 0,18349591 |
| Puma concolor NC016470 22              | Procyon lotor AB462046 3             | 0,1834961  |
| Zalophus wolfebaeki SRR4431565 1       | Mungos mungo MMC7 1                  | 0,18349639 |
| Puma concolor NC016470 22              | Martes pennanti NC020664 16          | 0,18349656 |
| Prionailurus planiceps KY682741 4      | Martes pennanti NC020664 16          | 0,18349679 |
| Mustela nivalis T306 5                 | Genetta servalina NC024568 2         | 0,18349688 |
| Mustela altaica NC021751 1             | Leopardus tigrinus NC028317 1        | 0,18349689 |
| Martes pennanti NC020664 16            | Leopardus pardalis T262 1            | 0,18349692 |
| Prionailurus rubiginosus NC028304 2    | Poecilogale albinucha T602 1         | 0,18349725 |
| Ursus thibetanus formosanus NC009331 1 | Arctocepalus townsendi NC008420 1    | 0,18349788 |
| Ursus thibetanus laniger MH281753 2    | Lutra lutra LC050126 1               | 0,18349804 |
| Mustela sibirica AP017394 11           | Chrysocyon brachyurus NC024172 1     | 0,18349835 |
| Procyon lotor AB462049 4               | Catopuma badia NC028300 1            | 0,18349899 |
| Martes martes T302 3                   | Caracal caracal NC028306 1           | 0,18349943 |
| Lynx canadensis NC028313 1             | Canis aureus KT448274 1              | 0,18350047 |
| Viverra tangalunga MH464792 1          | Arctictis binturong T605 2           | 0,18350284 |
| Caracal caracal NC028306 1             | Bassariscus sumichrasti SRX1099089 1 | 0,18350303 |
| Zalophus wolfebaeki SRR4431565 1       | Viverricula indica XK891745 1        | 0,18350396 |
| Melurus ursinus NC009970 2             | Aonyx cinerea NC035814 2             | 0,18350542 |
| Viverricula indica NC025296 2          | Martes foina NC020643 1              | 0,18350565 |
| Civettictis civetta GLC19 1            | Ailuropoda melanoleuca NC009492 5    | 0,18350625 |
| Zalophus wolfebaeki SRR4431565 1       | Viverricula indica NC025296 2        | 0,18350799 |
| Ursus arctos AP012576 6                | Mustela putorius NC020638 4          | 0,18350998 |
| Vulpes ferrillata NC027935 1           | Homotherium latidens MF871702 3      | 0,18351102 |
| Mustela nivalis T306 5                 | Arctictis binturong T605 2           | 0,18351169 |
| Gulo gulo NC009685 3                   | Crossarchus platycephalus C7R66 1    | 0,18351234 |
| Martes zibellina NC011579 39           | Canis lupus chanco NC010340 4        | 0,18351234 |
| Ursus spelaeus NC011112 8              | Leopardus wiedii NC028318 1          | 0,18351461 |
| Ursus thibetanus thibetanus NC011118 4 | Prionailurus rubiginosus NC028304 2  | 0,18351586 |
| Ursus spelaeus NC011112 8              | Caracal caracal NC028306 1           | 0,18351622 |
| Ursus spelaeus NC011112 8              | Leopardus geoffroyi NC028320 1       | 0,18351859 |
| Ictonyx striatus T299 1                | Arctictis binturong T605 2           | 0,18351939 |
| Martes flavigula NC012141 3            | Uva semitorquata MH464789 1          | 0,18352148 |
| Leopardus wiedii NC028318 1            | Arctocepalus forsteri NC004023 28    | 0,18352176 |
| Zalophus californianus NC008416 1      | Leptailurus serval NC028316 1        | 0,18352214 |
| Hemigalus derbyanus MH464791 1         | Galictis vittata T412 1              | 0,183523   |
| Urocyon littoralis catalinae KP129018  | Ailichoerus grypus NC001602 2        | 0,18352823 |
| Martes flavigula NC012141 3            | Catopuma badia NC028300 1            | 0,18353017 |
| Viverricula indica XK891751 1          | Spilogale putorius NC010497 1        | 0,18353374 |
| Martes flavigula NC012141 3            | Felis catus NC001700 2               | 0,18353474 |

|                                        |                                    |            |
|----------------------------------------|------------------------------------|------------|
| Martes americana NC020642 1            | Lutra sumatrana NC035810 1         | 0,13008951 |
| Melogale moschata KP726273 1           | Lutra lutra NC011358 9             | 0,13008951 |
| Hemigalus derbyanus MH464791 1         | Genetta genetta T297 1             | 0,1301342  |
| Melogale moschata V0735A 1             | Enhydra lutris NC009692 1          | 0,1301568  |
| Melogale moschata NC020644 1           | Lutra lutra LC050126 1             | 0,13016334 |
| Diplogale hosei MH464790 1             | Civettictis civetta NC033378 1     | 0,13016795 |
| Martes zibellina NC011579 39           | Lutra sumatrana NC035810 1         | 0,13022411 |
| Mustela itatsi NC034330 19             | Lutra lutra LC050126 1             | 0,13029635 |
| Mustela nigripes NC024942 1            | Lutra lutra LC050126 1             | 0,13029657 |
| Melogale moschata NC020644 1           | Lutra lutra NC011358 9             | 0,13029791 |
| Martes martes T302 3                   | Lutra lutra LC050126 1             | 0,13030045 |
| Mustela nigripes NC024942 1            | Martes zibellina NC011579 39       | 0,13030288 |
| Panthera leo spelaea KX258452 2        | Homotherium latidens MF871702 3    | 0,13035417 |
| Mustela frenata NC020640 1             | Martes melampus NC009678 1         | 0,13036345 |
| Mustela kathiah NC023210 1             | Enhydra lutris NC009692 1          | 0,13036384 |
| Mustela sibirica NC020637 6            | Lutra lutra LC050126 1             | 0,13036391 |
| Martes foina NC020643 1                | Arctonyx collaris NC020645 1       | 0,13036565 |
| Martes martes T302 3                   | Lutra lutra NC011358 9             | 0,13036741 |
| Melogale moschata NC020644 1           | Martes flavigula NC012141 3        | 0,13040665 |
| Martes pennanti NC020664 16            | Lutra sumatrana NC035810 1         | 0,13043644 |
| Mustela sibirica NC020637 6            | Martes americana NC020642 1        | 0,13043694 |
| Mustela putorius NC020638 4            | Martes martes T302 3               | 0,1304411  |
| Mustela altaica NC021751 1             | Martes pennanti NC020664 16        | 0,13044785 |
| Mustela itatsi NC034330 19             | Martes melampus NC009678 1         | 0,13049845 |
| Mustela sibirica NC020637 6            | Lutra sumatrana NC035810 1         | 0,13049857 |
| Mustela eversmannii NC028013 1         | Martes melampus NC009678 1         | 0,13049865 |
| Mustela erminea T305 2                 | Arctonyx collaris NC020645 1       | 0,13049898 |
| Mustela sibirica AP017394 11           | Martes americana NC020642 1        | 0,13050409 |
| Mustela putorius NC020638 4            | Martes americana NC020642 1        | 0,13050434 |
| Mustela sibirica AP017394 11           | Martes zibellina NC011579 39       | 0,13050456 |
| Mustela nivalis T306 5                 | Martes melampus NC009678 1         | 0,13050474 |
| Mustela sibirica AP017394 11           | Melogale moschata NC020644 1       | 0,13050538 |
| Spilogale putorius NC010497 1          | Mephitis mephitis NC020648 1       | 0,13052028 |
| Panthera pardus NC010641 5             | Homotherium latidens MF871702 3    | 0,13053683 |
| Panthera uncia NC010638 1              | Homotherium latidens MF871702 3    | 0,13054007 |
| Mustela kathiah NC023210 1             | Lutra lutra LC050126 1             | 0,13055627 |
| Mustela erminea T305 2                 | Meles leucurus NC039173 4          | 0,13055684 |
| Mustela nivalis T306 5                 | Lutra sumatrana NC035810 1         | 0,13057204 |
| Genetta servalina NC024568 2           | Chrotogale owstoni T607 1          | 0,13062046 |
| Mustela erminea T305 2                 | Lontra canadensis SRR10409165 1    | 0,13063218 |
| Mustela putorius NC020638 4            | Lutra sumatrana NC035810 1         | 0,13063313 |
| Mustela sibirica NC020637 6            | Martes zibellina NC011579 39       | 0,13063931 |
| Mustela erminea T305 2                 | Lutrogale perspicillata NC035811 1 | 0,13064127 |
| Mustela nivalis T306 5                 | Martes martes T302 3               | 0,13064897 |
| Martes melampus NC009678 1             | Lutra lutra NC011358 9             | 0,13069521 |
| Paradoxurus jerdoni MH464793 1         | Genetta genetta T297 1             | 0,13069853 |
| Mustela itatsi NC034330 19             | Martes zibellina NC011579 39       | 0,13070695 |
| Mustela nigripes NC024942 1            | Martes foina NC020643 1            | 0,13071197 |
| Martes flavigula NC012141 3            | Enhydra lutris NC009692 1          | 0,13073057 |
| Mustela sibirica AP017394 11           | Martes flavigula NC012141 3        | 0,13073692 |
| Mustela altaica NC021751 1             | Martes flavigula NC012141 3        | 0,13074307 |
| Martes pennanti NC020664 16            | Lutra lutra NC011358 9             | 0,13077308 |
| Martes pennanti NC020664 16            | Lutra lutra LC050126 1             | 0,13077313 |
| Mustela frenata NC020640 1             | Martes americana NC020642 1        | 0,13077738 |
| Mustela nivalis T306 5                 | Martes zibellina NC011579 39       | 0,13077931 |
| Paradoxurus hermaphroditus NC039591 1  | Genetta abyssinica MG489822 1      | 0,13083141 |
| Melogale moschata V0735A 1             | Lutra sumatrana NC035810 1         | 0,1308971  |
| Mustela altaica NC021751 1             | Lutra lutra NC011358 9             | 0,13090822 |
| Mustela sibirica NC020637 6            | Melogale moschata NC020644 1       | 0,13090906 |
| Martes melampus NC009678 1             | Lutra lutra LC050126 1             | 0,13101369 |
| Mustela kathiah NC023210 1             | Lutra lutra NC011358 9             | 0,13103674 |
| Mustela altaica NC021751 1             | Lutra sumatrana NC035810 1         | 0,13104282 |
| Neovison vison NC020641 3              | Martes zibellina NC011579 39       | 0,1310477  |
| Civettictis civetta NC033378 1         | Chrotogale owstoni T607 1          | 0,13112278 |
| Paradoxurus jerdoni MH464793 1         | Civettictis civetta NC033378 1     | 0,13112836 |
| Melogale moschata KP726273 1           | Martes flavigula NC012141 3        | 0,13114216 |
| Mustela nivalis T306 5                 | Martes flavigula NC012141 3        | 0,13114785 |
| Viverricula indica KX891751 1          | Chrotogale owstoni T607 1          | 0,1311568  |
| Vulpes corsac NC023958 1               | Canis adustus KT448271 1           | 0,13122536 |
| Vulpes vulpes NC008434 5               | Canis adustus KT448271 1           | 0,13123612 |
| Mustela itatsi NC034330 19             | Martes martes T302 3               | 0,13124572 |
| Mustela putorius NC020638 4            | Lutra lutra LC050126 1             | 0,13130607 |
| Mustela kathiah NC023210 1             | Martes martes T302 3               | 0,13131237 |
| Mustela eversmannii NC028013 1         | Lutra sumatrana NC035810 1         | 0,13137364 |
| Neovison vison NC020641 3              | Martes americana NC020642 1        | 0,13138391 |
| Mustela sibirica NC020637 6            | Martes foina NC020643 1            | 0,131385   |
| Paradoxurus hermaphroditus NC039591 1  | Civettictis civetta NC033378 1     | 0,13139741 |
| Martes americana NC020642 1            | Lutra lutra NC011358 9             | 0,13143555 |
| Mustela frenata NC020640 1             | Meles leucurus NC039173 4          | 0,13144304 |
| Mustela sibirica AP017394 11           | Melogale moschata KP726273 1       | 0,13144651 |
| Mustela eversmannii NC028013 1         | Martes martes T302 3               | 0,13145077 |
| Viverra tangalunga MH464792 1          | Enhydra lutris NC009692 1          | 0,13150829 |
| Ursus thibetanus thibetanus NC011118 4 | Arctotherium sp NC030174 1         | 0,13151428 |
| Mustela putorius NC020638 4            | Martes zibellina NC011579 39       | 0,13151442 |
| Mustela nivalis T306 5                 | Martes foina NC020643 1            | 0,13152562 |
| Paradoxurus jerdoni MH464793 1         | Cynogale bennetti KY117544 1       | 0,13154703 |
| Mustela itatsi NC034330 19             | Lutra sumatrana NC035810 1         | 0,1315752  |
| Mustela sibirica AP017394 11           | Lutra lutra LC050126 1             | 0,13157545 |
| Mustela eversmannii NC028013 1         | Lutra lutra LC050126 1             | 0,13157547 |
| Mustela sibirica NC020637 6            | Melogale moschata KP726273 1       | 0,13158108 |
| Mustela kathiah NC023210 1             | Melogale moschata KP726273 1       | 0,13158123 |
| Mustela nivalis T306 5                 | Lutra lutra LC050126 1             | 0,13158162 |
| Mustela nigripes NC024942 1            | Melogale moschata NC020644 1       | 0,13158195 |
| Mustela itatsi NC034330 19             | Martes flavigula NC012141 3        | 0,13161078 |
| Neofelis nebulosa NC008450 3           | Homotherium latidens MF871702 3    | 0,13164064 |
| Neovison vison NC020641 3              | Martes melampus NC009678 1         | 0,13164599 |
| Mustela frenata NC020640 1             | Melogale moschata V0735A 1         | 0,13164954 |
| Mustela frenata NC020640 1             | Martes pennanti NC020664 16        | 0,13165163 |
| Mustela sibirica AP017394 11           | Martes foina NC020643 1            | 0,13165416 |
| Mustela putorius NC020638 4            | Martes flavigula NC012141 3        | 0,13167915 |
| Mustela eversmannii NC028013 1         | Martes flavigula NC012141 3        | 0,13167989 |
| Martes zibellina NC011579 39           | Lutra lutra NC011358 9             | 0,13170469 |
| Mustela eversmannii NC028013 1         | Martes americana NC020642 1        | 0,13171569 |

|                                        |                                      |            |
|----------------------------------------|--------------------------------------|------------|
| Leptailurus serval NC028316 1          | Eumetopias jubatus NC004030 10       | 0,18353651 |
| Nasua nasua NC020647 1                 | Mustela eversmannii NC028013 1       | 0,18353735 |
| Lutra lutra LC050126 1                 | Canis latrans NC008093 7             | 0,18353933 |
| Mustela nigripes NC024942 1            | Chrotogale owstoni T607 1            | 0,1835404  |
| Cynictis penicillata T375 1            | Arctonyx collaris NC020645 1         | 0,18354322 |
| Lutra lutra LC050126 1                 | Galidictis fasciata DM333 1          | 0,18354398 |
| Phocarcos hookeri NC008418 1           | Mustela itatsi NC034330 19           | 0,18354401 |
| Urocyon cinereoargenteus NC026723 2    | Pusa sibirica NC008432 2             | 0,1835451  |
| Potos flavus T414 1                    | Phocarcos hookeri NC008418 1         | 0,18354556 |
| Mungotictis decemlineata NC027828 2    | Meles leucurus NC039173 4            | 0,18354572 |
| Bassariscus sumichrasti SRX1099089 1   | Atilax paludinosus T606 1            | 0,18354715 |
| Mirounga angustirostris SRR10331586 1  | Tapirus terrestris T358              | 0,18354937 |
| Mephitis mephitis NC020648 1           | Lutra lutra NC011358 9               | 0,18354952 |
| Paguma larvata PDS11 2                 | Melogale moschata V0735A 1           | 0,18355167 |
| Puma concolor NC016470 22              | Ailuurus fulgens styani NC009691 1   | 0,18355353 |
| OTaria byronia OTAB 1                  | Chrotogale owstoni T607 1            | 0,1835537  |
| Ursus arctos GU573491 207              | Martes melampus NC009678 1           | 0,18355386 |
| Mustela sibirica AP017394 11           | Arctotherium sp NC030174 1           | 0,18355396 |
| Vulpes zerda K603240 1                 | Viverricula indica KX891745 1        | 0,18355508 |
| Phocarcos hookeri NC008418 1           | Mustela altaica NC021751 1           | 0,18355519 |
| Enhydra lutris NC009692 1              | Arctictis binturong T605 2           | 0,18355555 |
| Mustela itatsi NC034330 19             | Felis nigripes NC028309 1            | 0,18355623 |
| Martes foina NC020643 1                | Atilax paludinosus T606 1            | 0,1835565  |
| Vulpes vulpes NC008434 5               | Prionailurus planiceps KY682741 4    | 0,1835577  |
| Lynx lynx NC027083 4                   | Canis anthus NC027956 2              | 0,18355811 |
| Lynx pardinus NC028319 161             | Canis anthus NC027956 2              | 0,18355881 |
| Taxidea taxus NC020646 1               | Canis aureus KT448274 1              | 0,18355928 |
| Felis catus NC001700 2                 | Canis anthus NC027956 2              | 0,18355951 |
| Ursus maritimus GU573488 Svalbard      | Neophoca cinerea NC008419 1          | 0,18356012 |
| Nyctereutes procyonoides NC013700 3    | Leopardus tigrinus NC028317 1        | 0,18356027 |
| Viverricula indica KX891751 1          | Procyon lotor AB462049 4             | 0,18356046 |
| Catopuma badia NC028300 1              | Ailuurus fulgens NC011124 1          | 0,18356061 |
| Ursus arctos AP012576 6                | Eumetopias jubatus NC004030 10       | 0,18356113 |
| Ursus arctos GU573491 207              | Martes martes T302 3                 | 0,18356253 |
| Ursus arctos EU497665 29               | Mustela itatsi NC034330 19           | 0,18356293 |
| Felis catus NC001700 2                 | Aonyx cinerea NC035814 2             | 0,18356353 |
| Pardofelis marmorata NLN3 2            | Bassariscus sumichrasti SRX1099089 1 | 0,18356416 |
| Mustela erminea T305 2                 | Mirounga leonina NC008422 1          | 0,18356453 |
| Prionailurus bengalensis NC028301 12   | Poecilogale albinocha T602 1         | 0,18356495 |
| Prionailurus bengalensis CKM45 20      | Neophoca cinerea NC008419 1          | 0,1835651  |
| Ursus thibetanus formosanus NC0093     | Melogale moschata V0735A 1           | 0,18356554 |
| Ursus arctos AP012576 6                | Callorhinus ursinus NC008415 1       | 0,18356794 |
| Ursus arctos GU573486 5                | Arctonyx collaris NC020645 1         | 0,1835683  |
| Procyon lotor AB462046 3               | Genetta abyssinica MG489822 1        | 0,18356913 |
| Prionailurus bengalensis CKM45 20      | Canis anthus NC027956 2              | 0,18356977 |
| Mustela altaica NC021751 1             | Canis aureus KT448274 1              | 0,18357231 |
| Melogale moschata KP726273 1           | Acinonyx jubatus NC005212 3          | 0,18357389 |
| Ursus thibetanus mupinensis NC00875    | Catopuma badia NC028300 1            | 0,18357484 |
| Proteles cristata T393 6               | Monachus schauinslandi NC008421 1    | 0,18357907 |
| Zalophus californianus NC008416 1      | Lynx lynx NC027083 4                 | 0,18358552 |
| Martes flavigula NC012141 3            | Uva javanica T413 1                  | 0,18358573 |
| Urocyon cinereoargenteus NC026723 2    | Monachus monachus NC044972 5         | 0,18358582 |
| Ursus thibetanus mupinensis NC00875    | Leopardus colocolo NC028314 1        | 0,18358919 |
| Vulpes corsac NC023958 1               | Hemigalus derbyanus MH464791 1       | 0,1835918  |
| Mustela nigripes NC024942 1            | Cuon alpinus NC013445 3              | 0,18359384 |
| Puma yagouaroundi NC028311 1           | Canis mesomelas KT448280 1           | 0,18359488 |
| Nandinia binotata NC024567 1           | Cuon alpinus NC013445 3              | 0,18359743 |
| Lynx rufus NC014456 3                  | Lycalopex sechurae KT448284 1        | 0,18359767 |
| Ursus thibetanus thibetanus NC011118 4 | Leopardus colocolo NC028314 1        | 0,18360074 |
| Lutra sumatrana NC035810 1             | Atilax paludinosus T606 1            | 0,18360773 |
| Mustela eversmannii NC028013 1         | Arctocepalus townsendi NC008420 1    | 0,18360789 |
| Pusa hispida NC008433 1                | Cynogale bennetti KY117544 1         | 0,18360831 |
| Melogale moschata KP726273 1           | Arctocepalus townsendi NC008420 1    | 0,18360832 |
| Mustela sibirica AP017394 11           | Uva semitorquata MH464789 1          | 0,18360975 |
| Ursus arctos isabellinus 1885 2        | Genetta abyssinica MG489822 1        | 0,18361087 |
| Mungos mungo MMC7 1                    | Arctocepalus forsteri KT693377 17    | 0,18361169 |
| Salanoia concolor D378 1               | Martes zibellina NC011579 39         | 0,18361184 |
| Crossarchus platycephalus C7R66 1      | Canis latrans NC008093 7             | 0,18361202 |
| Lutra lutra LC050126 1                 | Civettictis civetta GLC19 1          | 0,183613   |
| Mustela erminea T305 2                 | Bdeogale nigripes GLC15 1            | 0,18361318 |
| Canis mesomelas KT448280 1             | Acinonyx jubatus NC005212 3          | 0,18361357 |
| Mustela nigripes NC024942 1            | Diplogale hosei MH464790 1           | 0,1836147  |
| Viverra zibetha T609 1                 | Arctocepalus australis MG023139 1    | 0,18361846 |
| Viverra zibetha T609 1                 | Arctocepalus forsteri KT693377 17    | 0,18361862 |
| Paradoxurus jerdoni MH464793 1         | Melogale moschata KP726273 1         | 0,18361935 |
| Bdeogale nigripes GLC15 1              | Arctodus simus NC011116 1            | 0,18362242 |
| Mustela eversmannii NC028013 1         | Leopardus tigrinus NC028317 1        | 0,18362296 |
| Viverricula indica NC025296 2          | Mustela eversmannii NC028013 1       | 0,18362422 |
| Vulpes lagopus NC026529 3              | Lynx pardinus NC028319 161           | 0,18362483 |
| Melogale moschata V0735A 1             | Catopuma badia NC028300 1            | 0,18362561 |
| Martes pennanti NC020664 16            | Civettictis civetta GLC19 1          | 0,18362643 |
| Ursus thibetanus mupinensis NC00875    | Galidictis fasciata DM333 1          | 0,1836267  |
| Ursus arctos GU573491 207              | Mustela frenata NC020640 1           | 0,18362746 |
| Galidictis fasciata DM333 1            | Arctodus simus NC011116 1            | 0,18362804 |
| Lynx lynx NC027083 4                   | Arctocepalus pusillus NC008417 1     | 0,18362805 |
| Nyctereutes procyonoides NC013700 3    | Leopardus jacobita NC028322 1        | 0,18362808 |
| Caracal caracal NC028306 1             | Canis anthus NC027956 2              | 0,1836282  |
| Puma yagouaroundi NC028311 1           | Nyctereutes procyonoides NC013700 3  | 0,18362913 |
| Ursus arctos GU573491 207              | Mustela putorius NC020638 4          | 0,18362941 |
| Viverra tangalunga MH464792 1          | Ursus thibetanus mupinensis NC00875  | 0,18363078 |
| Mustela erminea T305 2                 | Crocuta crocuta NC020670 3           | 0,1836312  |
| Viverricula indica NC025296 2          | Martes martes T302 3                 | 0,18363132 |
| Prionailurus planiceps KY682741 4      | Poecilogale albinocha T602 1         | 0,18363157 |
| Ursus maritimus NC003428 31            | Genetta servalina NC024568 2         | 0,18363188 |
| Procyon lotor AB462046 3               | Leptailurus serval NC028316 1        | 0,18363212 |
| Prionailurus bengalensis NC028301 12   | Aonyx cinerea NC035814 2             | 0,18363288 |
| Ursus thibetanus laniger MH281753 2    | Martes pennanti NC020664 16          | 0,18363313 |
| Ursus maritimus NC003428 31            | Mustela nivalis T306 5               | 0,18363474 |
| Panthera onca NC022842 1               | Mustela nigripes NC024942 1          | 0,18363498 |
| Profelis aurata NC028299 1             | Arctodus simus NC011116 1            | 0,18363568 |
| Genetta abyssinica MG489822 1          | Canis anthus NC027956 2              | 0,18363577 |
| Ursus arctos pruinus MG066703 3        | Arctocepalus pusillus NC008417 1     | 0,18363616 |
| Meles anakuma NC009677 1               | Arctocepalus forsteri NC004023 28    | 0,18363644 |

|                                        |                                 |            |
|----------------------------------------|---------------------------------|------------|
| Genetta genetta T297 1                 | Arctictis binturong T605 2      | 0,13172136 |
| Melogale moschata V0735A 1             | Martes flavigula NC012141 3     | 0,13174751 |
| Galidia elegans D146 1                 | Cryptoprocta ferox CF13 1       | 0,13177334 |
| Mustela sibirica AP017394 11           | Lutra sumatrana NC035810 1      | 0,13177739 |
| Mustela nigripes NC024942 1            | Melogale moschata KP726273 1    | 0,13178295 |
| Helarctos malayanus NC009968 2         | Arctodus simus NC011116 1       | 0,13178392 |
| Ursus americanus JX196366 3            | Arctodus simus NC011116 1       | 0,13179861 |
| Mustela erminea T305 2                 | Meles meles T303 3              | 0,13184702 |
| Melogale moschata NC020644 1           | Martes pennanti NC020664 16     | 0,13185538 |
| Poecilogale albinucha T602 1           | Mustela frenata NC020640 1      | 0,13185722 |
| Panthera tigris amoyensis NC014770 2   | Homotherium latidens MF871702 3 | 0,1318663  |
| Mustela sibirica NC020637 6            | Martes flavigula NC012141 3     | 0,13188124 |
| Lontra canadensis SRR10409165 1        | Aonyx cinerea NC035814 2        | 0,13190658 |
| Martes zibellina NC011579 39           | Lutra lutra LC050126 1          | 0,13190658 |
| Melogale moschata KP726273 1           | Martes pennanti NC020664 16     | 0,13191652 |
| Mustela kathiah NC023210 1             | Martes zibellina NC011579 39    | 0,13191818 |
| Melogale moschata V0735A 1             | Lutra lutra NC011358 9          | 0,13197389 |
| Viverra tangalunga MH464792 1          | Lutra lutra LC050126 1          | 0,13197911 |
| Mustela eversmanni NC028013 1          | Melogale moschata NC020644 1    | 0,1319861  |
| Genetta abyssinica MG489822 1          | Diplogale hosei MH464790 1      | 0,13199119 |
| Mustela itatsi NC034330 19             | Martes foina NC020643 1         | 0,13199161 |
| Lutrogale perspicillata NC035811 1     | Lontra canadensis SRR10409165 1 | 0,13204089 |
| Mustela kathiah NC023210 1             | Martes melampus NC009678 1      | 0,13204582 |
| Martes foina NC020643 1                | Lutra sumatrana NC035810 1      | 0,13204759 |
| Melogale moschata KP726273 1           | Aonyx cinerea NC035814 2        | 0,13210848 |
| Viverra tangalunga MH464792 1          | Lutra sumatrana NC035810 1      | 0,13211386 |
| Mustela eversmanni NC028013 1          | Martes zibellina NC011579 39    | 0,13212001 |
| Mustela nigripes NC024942 1            | Martes pennanti NC020664 16     | 0,13212316 |
| Paradoxurus hermaphroditus NC039591 1  | Genetta genetta T297 1          | 0,1321798  |
| Mustela erminea T305 2                 | Meles anakuma NC009677 1        | 0,13218115 |
| Mustela itatsi NC034330 19             | Martes pennanti NC020664 16     | 0,13219021 |
| Vulpes ferrilata NC027935 1            | Canis adustus KT448271 1        | 0,13219309 |
| Martes americana NC020642 1            | Lutra lutra LC050126 1          | 0,13224308 |
| Mustela itatsi NC034330 19             | Lutra lutra NC011358 9          | 0,1323154  |
| Martes foina NC020643 1                | Enhydra lutris NC009692 1       | 0,13231719 |
| Mustela putorius NC020638 4            | Melogale moschata NC020644 1    | 0,13232239 |
| Mustela nivalis T306 5                 | Martes americana NC020642 1     | 0,13232686 |
| Neovison vison NC020641 3              | Martes pennanti NC020664 16     | 0,13232824 |
| Neovison vison NC020641 3              | Martes foina NC020643 1         | 0,13233246 |
| Martes flavigula NC012141 3            | Arctonyx collaris NC020645 1    | 0,13234426 |
| Lutra lutra LC050126 1                 | Gulo gulo NC009685 3            | 0,13234568 |
| Ursus thibetanus formosanus NC009331 1 | Arctotherium sp NC030174 1      | 0,13238472 |
| Martes martes T302 3                   | Enhydra lutris NC009692 1       | 0,13238701 |
| Lutra sumatrana NC035810 1             | Ictonyx striatus T299 1         | 0,13239047 |
| Mustela altaica NC021751 1             | Gulo gulo NC009685 3            | 0,13242607 |
| Martes melampus NC009678 1             | Lontra canadensis SRR10409165 1 | 0,13244498 |
| Mustela nivalis T306 5                 | Martes pennanti NC020664 16     | 0,13246696 |
| Mustela kathiah NC023210 1             | Martes flavigula NC012141 3     | 0,13248588 |
| Mustela eversmanni NC028013 1          | Melogale moschata KP726273 1    | 0,1325233  |
| Mustela frenata NC020640 1             | Martes martes T302 3            | 0,13252456 |
| Neovison vison NC020641 3              | Martes martes T302 3            | 0,13252814 |
| Meles leucurus NC039173 4              | Martes flavigula NC012141 3     | 0,13254637 |
| Meles leucurus NC039173 4              | Martes foina NC020643 1         | 0,13258635 |
| Meles meles T303 3                     | Martes foina NC020643 1         | 0,13258649 |
| Ursus thibetanus laniger MH281753 2    | Arctotherium sp NC030174 1      | 0,13259166 |
| Lutra lutra LC050126 1                 | Ictonyx striatus T299 1         | 0,1325925  |
| Neovison vison NC020641 3              | Melogale moschata V0735A 1      | 0,13259549 |
| Mustela itatsi NC034330 19             | Ictonyx striatus T299 1         | 0,1325998  |
| Galidia elegans D146 1                 | Eupleres goudotii D128 1        | 0,13271156 |
| Panthera tigris NC010642 35            | Homotherium latidens MF871702 3 | 0,13271758 |
| Mustela kathiah NC023210 1             | Lutra sumatrana NC035810 1      | 0,13271903 |
| Mustela itatsi NC034330 19             | Martes americana NC020642 1     | 0,13272557 |
| Lutra lutra NC011358 9                 | Ictonyx striatus T299 1         | 0,13272676 |
| Mustela eversmanni NC028013 1          | Martes pennanti NC020664 16     | 0,13272899 |
| Lutra lutra NC011358 9                 | Gulo gulo NC009685 3            | 0,13275014 |
| Melogale moschata V0735A 1             | Lutra lutra LC050126 1          | 0,13278148 |
| Ursus thibetanus mupinensis NC008753 2 | Arctotherium sp NC030174 1      | 0,13278426 |
| Mustela frenata NC020640 1             | Lontra canadensis SRR10409165 1 | 0,13278617 |
| Mustela frenata NC020640 1             | Ictonyx striatus T299 1         | 0,13280191 |
| Lutra sumatrana NC035810 1             | Gulo gulo NC009685 3            | 0,13281669 |
| Martes melampus NC009678 1             | Enhydra lutris NC009692 1       | 0,13284878 |
| Mustela kathiah NC023210 1             | Melogale moschata NC020644 1    | 0,13286068 |
| Poecilogale albinucha T602 1           | Neovison vison NC020641 3       | 0,13287169 |
| Melogale moschata V0735A 1             | Gulo gulo NC009685 3            | 0,13288745 |
| Mustela sibirica NC020637 6            | Lutra lutra NC011358 9          | 0,13292144 |
| Vulpes lagopus NC026529 3              | Canis adustus KT448271 1        | 0,13292418 |
| Martes martes T302 3                   | Lontra canadensis SRR10409165 1 | 0,13292475 |
| Mustela nivalis T306 5                 | Lutra lutra NC011358 9          | 0,13292773 |
| Mustela itatsi NC034330 19             | Melogale moschata NC020644 1    | 0,13292824 |
| Mustela putorius NC020638 4            | Martes pennanti NC020664 16     | 0,13293079 |
| Ursus spelaeus EU327344 13             | Arctodus simus NC011116 1       | 0,13293335 |
| Mustela putorius NC020638 4            | Gulo gulo NC009685 3            | 0,13295896 |
| Genetta abyssinica MG489822 1          | Chrotogale owstoni T607 1       | 0,13296601 |
| Ursus semitorquatus MH464789 1         | Fossa fossana D350 1            | 0,13297872 |
| Mustela nigripes NC024942 1            | Lutra lutra NC011358 9          | 0,13298868 |
| Martes foina NC020643 1                | Lutra lutra NC011358 9          | 0,13298978 |
| Mustela frenata NC020640 1             | Martes zibellina NC011579 39    | 0,13299528 |
| Mustela putorius NC020638 4            | Martes foina NC020643 1         | 0,13313502 |
| Taxidea taxus NC020646 1               | Mustela erminea T305 2          | 0,13313967 |
| Mustela kathiah NC023210 1             | Gulo gulo NC009685 3            | 0,13316113 |
| Genetta servalina NC024568 2           | Diplogale hosei MH464790 1      | 0,1331832  |
| Martes foina NC020643 1                | Lutra lutra LC050126 1          | 0,13319179 |
| Mustela putorius NC020638 4            | Melogale moschata KP726273 1    | 0,13319644 |
| Mustela nigripes NC024942 1            | Ictonyx striatus T299 1         | 0,13320555 |
| Mustela frenata NC020640 1             | Gulo gulo NC009685 3            | 0,13322721 |
| Paradoxurus hermaphroditus N1NC 1      | Cynogale bennetti KY117544 1    | 0,13323186 |
| Martes zibellina NC011579 39           | Lontra canadensis SRR10409165 1 | 0,13325258 |
| Melogale moschata NC020644 1           | Gulo gulo NC009685 3            | 0,13329695 |
| Martes foina NC020643 1                | Aonyx cinerea NC035814 2        | 0,13332634 |
| Mustela sibirica AP017394 11           | Martes pennanti NC020664 16     | 0,13333616 |
| Mustela nigripes NC024942 1            | Gulo gulo NC009685 3            | 0,1333627  |
| Neovison vison NC020641 3              | Gulo gulo NC009685 3            | 0,13336611 |
| Martes zibellina NC011579 39           | Enhydra lutris NC009692 1       | 0,13338718 |

|                                        |                                        |            |
|----------------------------------------|----------------------------------------|------------|
| Genetta abyssinica MG489822 1          | Arctocepalus pusillus NC008417 1       | 0,18363692 |
| Viverra zibetha T609 1                 | Ursus arctos pruinosus MG066703 3      | 0,18363759 |
| Ursus thibetanus formosanus NC009331 1 | Galidictis fasciata DM333 1            | 0,18363824 |
| Viverra tangalunga MH464792 1          | Ursus thibetanus formosanus NC009331 1 | 0,18364003 |
| Ursus spelaeus EU327344 13             | Lutra sumatrana NC035810 1             | 0,18364075 |
| Zalophus wollebaeki SRR4431565 1       | Felis margarita NC028308 1             | 0,18364088 |
| Zalophus wollebaeki SRR4431565 1       | Prionailurus rubiginosus NC028304 2    | 0,1836412  |
| Melursus ursinus NC009970 2            | Arctonyx collaris NC020645 1           | 0,18364172 |
| Ursus arctos AP012576 6                | Neophoca cinerea NC008419 1            | 0,18364343 |
| Martes americana NC020642 1            | Leopardus colocolo NC028314 1          | 0,18364401 |
| Mustela altaica NC021751 1             | Helarctos malayanus NC009968 2         | 0,18364654 |
| Ursus spelaeus EU327344 13             | Catopuma temminckii NC027115 41        | 0,18364843 |
| Ursus thibetanus laniger MH281753 2    | Felis silvestris lybica KP202275 4     | 0,18364839 |
| Ursus thibetanus thibetanus NC011116 1 | Lynx pardinus NC028319 161             | 0,18364894 |
| Mustela nigripes NC024942 1            | Lycalopex secureus KT448284 1          | 0,18364908 |
| Ursus thibetanus thibetanus NC011116 1 | Felis margarita NC028308 1             | 0,1836495  |
| Prionailurus planiceps KY682741 4      | Helarctos malayanus NC009968 2         | 0,18364966 |
| Ursus spelaeus EU327344 13             | Ursus thibetanus thibetanus NC011116 1 | 0,18365183 |
| Smilodon populator MF871700 1          | Lycopus pictus NC028427 2              | 0,18365617 |
| Civettictis civetta NC033378 1         | Arctocepalus gazella BK010918 1        | 0,18365696 |
| Mustela kathiah NC023210 1             | Canis mesomelas KT448280 1             | 0,18366022 |
| Taxidea taxus NC020646 1               | Panthera leo NER0 19                   | 0,18366088 |
| Urocyon cinereogargenteus NC026723 2   | Halichoerus grypus NC001602 2          | 0,18366295 |
| Mustela itatsi NC034330 19             | Civettictis civetta NC033378 1         | 0,18366313 |
| Homotherium latidens MF871702 3        | Ailuropoda melanooleuca NC009492 5     | 0,18366578 |
| Ursus americanus JX196366 3            | Mustela putorius NC020638 4            | 0,18366614 |
| Ursus americanus JX196366 3            | Martes martes T302 3                   | 0,18366674 |
| Hyena hyena NC020669 1                 | Canis adustus KT448271 1               | 0,18366948 |
| Proteles cristata T393 6               | Monachus monachus NC004972 5           | 0,18367018 |
| Gulo gulo NC009685 3                   | Genetta abyssinica MG489822 1          | 0,1836758  |
| Ursus semitorquatus MH464789 1         | Callorhinus ursinus NC008415 1         | 0,18367633 |
| Viverra tangalunga MH464792 1          | Mungos mungo MMC7 1                    | 0,18367766 |
| Mungos mungo MMC7 1                    | Arctocepalus australis MG023139 1      | 0,18367887 |
| Procyon lotor AB462049 4               | Chrotogale owstoni T607 1              | 0,18367961 |
| Ursus arctos pruinosus MG066703 3      | Martes flavigula NC012141 3            | 0,18368044 |
| Mustela nivalis T306 5                 | Canis mesomelas KT448280 1             | 0,18368137 |
| Mungos mungo MMC7 1                    | Martes pennanti NC020664 16            | 0,18368308 |
| Mephitis mephitis NC020648 1           | Lutra lutra LC050126 1                 | 0,18368571 |
| Meles anakuma NC009677 1               | Leopardus jacobita NC028322 1          | 0,18368576 |
| Genetta servalina NC024568 2           | Arctocepalus forsteri KT693377 17      | 0,18368662 |
| Meles anakuma NC009677 1               | Caracal caracal NC028306 1             | 0,18368742 |
| Felis catus NC001700 2                 | Ailuurus fulgens NC011124 1            | 0,18368761 |
| Felis nigripes NC028309 1              | Ailuurus fulgens NC011124 1            | 0,18368779 |
| Martes americana NC020642 1            | Genetta abyssinica MG489822 1          | 0,18368803 |
| Vulpes corsac NC023958 1               | Phoca groenlandica NC008429 54         | 0,18368881 |
| Lutra lutra LC050126 1                 | Canis aureus KT448274 1                | 0,18368821 |
| Otocolobus manu NC028323 1             | Callorhinus ursinus NC008415 1         | 0,18368825 |
| Vulpes lagopus NC026529 3              | Viverricula indica KX891745 1          | 0,18368879 |
| Viverricula indica KX891751 1          | Mustela putorius NC020638 4            | 0,18368919 |
| Ursus maritimus NC003428 31            | Arctocepalus towsoni NC008420 1        | 0,18368922 |
| Ursus arctos isabellinus 18B5 2        | Arctocepalus forsteri KT693377 17      | 0,18368962 |
| Profelis aurata NC028299 1             | Martes melampus NC009678 1             | 0,1836898  |
| Otocolobus manu NC028323 1             | Ailuurus fulgens NC011124 1            | 0,18368992 |
| Mustela sibirica AP017394 11           | Felis nigripes NC028309 1              | 0,18369073 |
| Potos flavus T414 1                    | Felis margarita NC028308 1             | 0,18369134 |
| Prionailurus rubiginosus NC028304 2    | Arctocepalus australis MG023139 1      | 0,18369153 |
| Vulpes lagopus NC026529 3              | Felis chaus NC028307 1                 | 0,18369198 |
| Melogale moschata V0735A 1             | Felis silvestris lybica KP202275 4     | 0,18369208 |
| Mustela putorius NC020638 4            | Genetta genetta T297 1                 | 0,18369228 |
| Lynx lynx NC027083 4                   | Lontra canadensis SRR10409165 1        | 0,18369263 |
| Mustela itatsi NC034330 19             | Diplogale hosei MH464790 1             | 0,18369313 |
| Otocolobus manu NC028323 1             | Martes americana NC020642 1            | 0,18369336 |
| Leopardus geoffroyi NC028320 1         | Ailuurus fulgens NC009691 1            | 0,18369354 |
| Viverra zibetha T609 1                 | Arctotherium sp NC030174 1             | 0,18369411 |
| Conepatus chinga NC042596 1            | Arctocepalus pusillus NC008417 1       | 0,18369432 |
| Neobelis nebulosa NC008450 3           | Monachus monachus NC004472 5           | 0,18369474 |
| Tremarctos ornatus NC009969 2          | Leopardus guigna NC028321 1            | 0,18369494 |
| Lynx canadensis NC028313 1             | Arctocepalus pusillus NC008417 1       | 0,18369557 |
| Salanoia concolor D378 1               | Ictonyx striatus T299 1                | 0,18369594 |
| Zalophus wollebaeki SRR4431565 1       | Conepatus chinga NC042596 1            | 0,18369675 |
| Ursus arctos pruinosus MG066703 3      | Mustela putorius NC020638 4            | 0,1836971  |
| Lynx lynx NC027083 4                   | Arctotherium sp NC030174 1             | 0,18369821 |
| Ursus arctos GU573491 207              | Ursus arctos EU497665 29               | 0,18369852 |
| Smilodon populator MF871700 1          | Otaria byronia OTAB 1                  | 0,18369959 |
| Paradoxurus hermaphroditus N1NC 1      | Arctodus simus NC011116 1              | 0,18370028 |
| Leptailurus serval NC028316 1          | Arctotherium sp NC030174 1             | 0,18370049 |
| Ursus maritimus NC003428 31            | Martes martes T302 3                   | 0,18370089 |
| Ursus arctos isabellinus 18B5 2        | Mustela nivalis T306 5                 | 0,18370189 |
| Ursus spelaeus NC011112 8              | Melogale moschata V0735A 1             | 0,18370332 |
| Ursus thibetanus mupinensis NC008753 2 | Felis silvestris lybica KP202275 4     | 0,18370515 |
| Ursus arctos AP012576 6                | Enhydra lutris NC009692 1              | 0,18370681 |
| Lycopus pictus NC028427 2              | Felis nigripes NC028309 1              | 0,18370773 |
| Homotherium latidens MF871702 3        | Arctocepalus forsteri KT693377 17      | 0,18370834 |
| Zalophus wollebaeki SRR4431565 1       | Leopardus pardalis T262 1              | 0,18371132 |
| Chrotogale owstoni T607 1              | Canis lupus familiaris NC002008 1231   | 0,18371506 |
| Mungos mungo MMC7 1                    | Martes flavigula NC012141 3            | 0,18371637 |
| Lynx rufus NC014456 3                  | Chrysocyon brachyurus NC024172 1       | 0,18371689 |
| Paradoxurus jerdoni MH464793 1         | Helarctos malayanus NC009968 2         | 0,18371716 |
| Hemigale derbyanus MH464791 1          | Cuon alpinus NC013445 3                | 0,18371937 |
| Ursus thibetanus laniger MH281753 2    | Leopardus guigna NC028321 1            | 0,18371968 |
| Melogale moschata NC020644 1           | Arctocepalus forsteri NC004028 28      | 0,1837202  |
| Leopardus colocolo NC028314 1          | Ictonyx striatus T299 1                | 0,18372218 |
| Bassariscus sumichrasti SRX1099089     | Arctictis binturong T605 2             | 0,18372227 |
| Mustela nigripes NC024942 1            | Canis mesomelas KT448280 1             | 0,18372458 |
| Lynx canadensis NC028313 1             | Canis lupus chanco NC010340 4          | 0,18372838 |
| Canis lupus chanco NC010340 4          | Arctonyx collaris NC020645 1           | 0,18372849 |
| Viverricula indica KX891751 1          | Eumetopias jubatus NC004030 10         | 0,18373166 |
| Ursus americanus JX196366 3            | Meles anakuma NC009677 1               | 0,18373221 |
| Galerella sanguinea T378 1             | Eumetopias jubatus NC004030 10         | 0,18373354 |
| Mustela sibirica AP017394 11           | Mungos mungo MMC7 1                    | 0,18374369 |
| Neophoca cinerea NC008419 1            | Meles anakuma NC009677 1               | 0,18374377 |
| Ictonyx striatus T299 1                | Canis adustus KT448271 1               | 0,18374714 |

|                                        |                                     |             |
|----------------------------------------|-------------------------------------|-------------|
| Melogale moschata NC020644 1           | Aonyx cinerea NC035814 2            | 0,1333936   |
| Mustela sibirica AP017394 11           | Melogale moschata V0735A 1          | 0,13339858  |
| Mustela frenata NC020640 1             | Martes foina NC020643 1             | 0,13340488  |
| Mustela nivalis T306 5                 | Melogale moschata KP726273 1        | 0,13347074  |
| Mustela sibirica NC020637 6            | Martes pennanti NC020664 16         | 0,13347076  |
| Mustela putorius NC020638 4            | Ictonyx striatus T299 1             | 0,13347496  |
| Melogale moschata KP726273 1           | Gulo gulo NC009685 3                | 0,1334926   |
| Mustela itatsi NC034330 19             | Melogale moschata KP726273 1        | 0,13353303  |
| Neovison vison NC020641 3              | Meles meles T303 3                  | 0,13353457  |
| Mustela eversmanni NC028013 1          | Martes foina NC020643 1             | 0,1335386   |
| Martes melampus NC009678 1             | Arctonyx collaris NC020645 1        | 0,13358907  |
| Mustela eversmanni NC028013 1          | Lutra lutra NC011358 9              | 0,13359454  |
| Vulpes zerda KJ603240 1                | Canis adustus KT448271 1            | 0,13359468  |
| Meles anakuma NC009677 1               | Martes foina NC020643 1             | 0,13359585  |
| Martes martes T302 3                   | Arctonyx collaris NC020645 1        | 0,13359624  |
| Mustela sibirica AP017394 11           | Ictonyx striatus T299 1             | 0,13360958  |
| Mustela nivalis T306 5                 | Gulo gulo NC009685 3                | 0,13363804  |
| Mustela kathiah NC023210 1             | Martes americana NC020642 1         | 0,13366774  |
| Ictonyx striatus T299 1                | Enhydra lutris NC009692 1           | 0,13367     |
| Paradoxurus hermaphroditus NC039591 1  | Cynogale bennetti KY117544 1        | 0,13370234  |
| Mustela putorius NC020638 4            | Lutra lutra NC011358 9              | 0,13372895  |
| Martes americana NC020642 1            | Enhydra lutris NC009692 1           | 0,13379097  |
| Martes americana NC020642 1            | Lontra canadensis SRR10409165 1     | 0,13379097  |
| Meles meles T303 3                     | Martes melampus NC009678 1          | 0,13379097  |
| Galerella sanguinea T378 1             | Fossa fossana D350 1                | 0,13379608  |
| Mustela sibirica NC020637 6            | Ictonyx striatus T299 1             | 0,13381153  |
| Mungos mungo/gambianus SRR7704821 1    | Fossa fossana D350 1                | 0,13385403  |
| Meles leucurus NC039173 4              | Martes melampus NC009678 1          | 0,13385826  |
| Mustela sibirica AP017394 11           | Lutra lutra NC011358 9              | 0,13386375  |
| Mustela frenata NC020640 1             | Arctonyx collaris NC020645 1        | 0,13386425  |
| Taxidea taxus NC020646 1               | Martes melampus NC009678 1          | 0,13387421  |
| Martes flavigula NC021241 3            | Aonyx cinerea NC035814 2            | 0,13390464  |
| Viverra tangalunga MH464792 1          | Lutra lutra NC011358 9              | 0,13393091  |
| Mustela sibirica NC020637 6            | Melogale moschata V0735A 1          | 0,13393697  |
| Neovison vison NC020641 3              | Meles leucurus NC039173 4           | 0,13393815  |
| Viverra tangalunga MH464792 1          | Martes melampus NC009678 1          | 0,133939804 |
| Mustela kathiah NC023210 1             | Martes foina NC020643 1             | 0,13401072  |
| Melogale moschata KP726273 1           | Lutrogale perspicillata NC035811 1  | 0,13405952  |
| Meles leucurus NC039173 4              | Martes americana NC020642 1         | 0,13406016  |
| Neovison vison NC020641 3              | Ictonyx striatus T299 1             | 0,13408539  |
| Mustela sibirica NC020637 6            | Gulo gulo NC009685 3                | 0,13410349  |
| Ursus arctos isabellinus 1885 2        | Arctodus simus NC011116 1           | 0,13413239  |
| Meles meles T303 3                     | Martes martes T302 3                | 0,1341349   |
| Helarctos malayanus NC009968 2         | Arctotherium sp NC030174 1          | 0,13413744  |
| Mustela nigripes NC024942 1            | Melogale moschata V0735A 1          | 0,1341389   |
| Viverra tangalunga MH464792 1          | Martes pennanti NC020664 16         | 0,13414204  |
| Mustela altaica NC021751 1             | Melogale moschata NC020644 1        | 0,13421257  |
| Mustela eversmanni NC028013 1          | Ictonyx striatus T299 1             | 0,13421537  |
| Taxidea taxus NC020646 1               | Martes martes T302 3                | 0,13421924  |
| Mustela eversmanni NC028013 1          | Gulo gulo NC009685 3                | 0,13423836  |
| Martes americana NC020642 1            | Aonyx cinerea NC035814 2            | 0,13426207  |
| Ursus spelaeus NC011112 8              | Arctodus simus NC011116 1           | 0,13428001  |
| Mustela eversmanni NC028013 1          | Melogale moschata V0735A 1          | 0,13434076  |
| Ursus spelaeus NC011112 8              | Arctotherium sp NC030174 1          | 0,13434395  |
| Mustela nivalis T306 5                 | Melogale moschata NC020644 1        | 0,13434753  |
| Martes martes T302 3                   | Ictonyx striatus T299 1             | 0,13441914  |
| Gulo gulo NC009685 3                   | Enhydra lutris NC009692 1           | 0,13443163  |
| Martes zibellina NC011579 39           | Lutrogale perspicillata NC035811 1  | 0,13446392  |
| Martes zibellina NC011579 39           | Arctonyx collaris NC020645 1        | 0,13446397  |
| Melurus ursinus NC009970 2             | Arctodus simus NC011116 1           | 0,13447976  |
| Nyctereutes procyonoides NC013700 3    | Canis adustus KT448271 1            | 0,13451122  |
| Ursus thibetanus laniger MH281753 2    | Tremarctos ornatus NC009969 2       | 0,13451646  |
| Xenogale naso C07XAR110 1              | Fossa fossana D350 1                | 0,13452734  |
| Mustela putorius NC020638 4            | Melogale moschata V0735A 1          | 0,13454276  |
| Ursus spelaeus EU327344 13             | Arctotherium sp NC030174 1          | 0,13454629  |
| Meles meles T303 3                     | Martes zibellina NC011579 39        | 0,13455855  |
| Melogale moschata V0735A 1             | Aonyx cinerea NC035814 2            | 0,13455855  |
| Meles meles T303 3                     | Martes pennanti NC020664 16         | 0,13460831  |
| Martes melampus NC009678 1             | Ictonyx striatus T299 1             | 0,13461104  |
| Mustela sibirica AP017394 11           | Gulo gulo NC009685 3                | 0,13464235  |
| Meles meles T303 3                     | Martes americana NC020642 1         | 0,13466586  |
| Mustela frenata NC020640 1             | Meles anakuma NC009677 1            | 0,13467154  |
| Martes zibellina NC011579 39           | Ictonyx striatus T299 1             | 0,1346783   |
| Meles meles T303 3                     | Gulo gulo NC009685 3                | 0,13469809  |
| Vulpes zerda KJ603240 1                | Nyctereutes procyonoides NC013700 3 | 0,13472027  |
| Genetta genetta T297 1                 | Chrotogale owstoni T607 1           | 0,13472949  |
| Martes foina NC020643 1                | Lontra canadensis SRR10409165 1     | 0,13473929  |
| Mustela nivalis T306 5                 | Ictonyx striatus T299 1             | 0,13475996  |
| Poecilogale albinucha T602 1           | Martes flavigula NC021241 3         | 0,13477819  |
| Martes americana NC020642 1            | Arctonyx collaris NC020645 1        | 0,13480046  |
| Martes melampus NC009678 1             | Aonyx cinerea NC035814 2            | 0,13480046  |
| Mustela kathiah NC023210 1             | Melogale moschata V0735A 1          | 0,13481216  |
| Taxidea taxus NC020646 1               | Martes zibellina NC011579 39        | 0,13482466  |
| Ursus arctos isabellinus 1885 2        | Arctotherium sp NC030174 1          | 0,13487013  |
| Mustela itatsi NC034330 19             | Lontra canadensis SRR10409165 1     | 0,13487262  |
| Meles leucurus NC039173 4              | Martes pennanti NC020664 16         | 0,13487746  |
| Mustela kathiah NC023210 1             | Martes pennanti NC020664 16         | 0,13488159  |
| Mustela altaica NC021751 1             | Melogale moschata KP726273 1        | 0,13488415  |
| Ursus thibetanus thibetanus NC011118 4 | Tremarctos ornatus NC009969 2       | 0,13493207  |
| Prionailurus bengalensis NC028301 12   | Nandinia binotata NC024567 1        | 0,13494131  |
| Martes martes T302 3                   | Aonyx cinerea NC035814 2            | 0,13494311  |
| Viverra tangalunga MH464792 1          | Martes martes T302 3                | 0,13494757  |
| Viverra tangalunga MH464792 1          | Martes foina NC020643 1             | 0,1349531   |
| Meles meles T303 3                     | Martes flavigula NC021241 3         | 0,13496967  |
| Fossa fossana D350 1                   | Atilax paludinosus T606 1           | 0,13499865  |
| Ursus arctos GU573491 207              | Arctodus simus NC011116 1           | 0,13500774  |
| Meles leucurus NC039173 4              | Martes martes T302 3                | 0,13500971  |
| Melogale moschata V0735A 1             | Martes pennanti NC020664 16         | 0,13501239  |
| Martes flavigula NC021241 3            | Lontra canadensis SRR10409165 1     | 0,13504808  |
| Poecilogale albinucha T602 1           | Lutra lutra LC050126 1              | 0,13508137  |
| Viverra tangalunga MH464792 1          | Martes americana NC020642 1         | 0,13514858  |
| Taxidea taxus NC020646 1               | Martes foina NC020643 1             | 0,13516802  |
| Nyctereutes procyonoides NC013700 3    | Canis latrans NC008093 7            | 0,13519154  |

|                                        |                                      |            |
|----------------------------------------|--------------------------------------|------------|
| Mungos mungo/gambianus SRR7704821 1    | Canis anthus NC027956 2              | 0,18374762 |
| Mustela putorius NC020638 4            | Diplogale hosei MH464790 1           | 0,1837482  |
| Tremarctos ornatus NC009969 2          | Aillurus fulgens NC01124 1           | 0,18374845 |
| Lutra sumatrana NC035810 1             | Galerella sanguinea T378 1           | 0,18375221 |
| Lutrogale perspicillata NC035811 1     | Arctocepalus pusillus NC008417 1     | 0,18375231 |
| Smlodon populator MF871700 1           | Lutra lutra NC011358 9               | 0,1837528  |
| Felis chaus NC028307 1                 | Enhydra lutris NC009692 1            | 0,18375304 |
| Leopardus wiedii NC028318 1            | Aillurus fulgens NC011124 1          | 0,18375368 |
| Prionailurus planiceps KY682741 4      | Arctonyx collaris NC020645 1         | 0,18375421 |
| Viverricula indica XK891751 1          | Melogale moschata KP726273 1         | 0,1837543  |
| Leopardus geoffroyi NC028320 1         | Conepatus chinga NC042596 1          | 0,18375468 |
| Pardofelis marmorata NLN3 2            | Mustela kathiah NC023210 1           | 0,18375666 |
| Viverricula indica XK891751 1          | Mustela nigripes NC024942 1          | 0,18375696 |
| Speothos venaticus C48 2               | Pusa sibirica NC008432 2             | 0,1837576  |
| Prionodon linsang ERR2391707 1         | Phoca largha NC008430 1              | 0,18375811 |
| Taxidea taxus NC020646 1               | Nyctereutes procyonoides NC013700 3  | 0,18375835 |
| Mustela sibirica NC020637 6            | Caracal caracal NC028306 1           | 0,18375865 |
| Vulpes vulpes NC008434 5               | Panthera uncia KP202269 1            | 0,18375869 |
| Tremarctos ornatus NC009969 2          | Prionailurus planiceps NC028312 6    | 0,18375902 |
| Nyctereutes procyonoides NC013700 3    | Civettictis civetta GLC19 1          | 0,18375993 |
| Melogale moschata V0735A 1             | Leptailurus serval NC028316 1        | 0,18376043 |
| Lontra canadensis SRR10409165 1        | Arctodus simus NC011116 1            | 0,1837606  |
| Vulpes ferrilata NC027935 1            | Prionailurus bengalensis NC028301 12 | 0,18376064 |
| Martes americana NC020642 1            | Felis chaus NC028307 1               | 0,18376069 |
| Salanoia concolor D378 1               | Arctodus simus NC011116 1            | 0,18376078 |
| Leopardus tigrinus NC028317 1          | Arctocepalus australis MG023139 1    | 0,18376099 |
| Leopardus wiedii NC028318 1            | Canis anthus NC027956 2              | 0,18376103 |
| Martes zibellina NC011579 39           | Leopardus tigrinus NC028317 1        | 0,18376149 |
| Catopuma temminckii NC027115 41        | Aillurus fulgens NC01124 1           | 0,18376164 |
| Ursus arctos pruinosus MG066703 3      | Martes americana NC020642 1          | 0,18376252 |
| Taxidea taxus NC020646 1               | Panthera onca KP202264 2             | 0,18376279 |
| Vulpes vulpes NC008434 5               | Leopardus geoffroyi NC028320 1       | 0,18376333 |
| Profelis aurata NC028299 1             | Canis latrans NC008093 7             | 0,18376334 |
| Ursus arctos GU573491 207              | Arctonyx collaris NC020645 1         | 0,18376344 |
| Ursus arctos GU573486 5                | Arctocepalus forsteri KT693377 1     | 0,18376404 |
| Mustela nivalis T306 5                 | Arctotherium sp NC030174 1           | 0,18376428 |
| Hemigalus derbyanus MH464791 1         | Callorhinus ursinus NC008415 1       | 0,18376474 |
| Hemigalus derbyanus MH464791 1         | Eumetopias jubatus NC004030 10       | 0,1837649  |
| Martes pennanti NC020664 16            | Lynx rufus NC014456 3                | 0,18376555 |
| Otaria byronia OTAB 1                  | Lynx pardinus NC028319 161           | 0,1837659  |
| Ursus thibetanus formosanus NC009333 1 | Lutra lutra LC050126 1               | 0,18376701 |
| Galerella sanguinea T378 1             | Arctodus simus NC011116 1            | 0,18376845 |
| Mustela sibirica NC020637 6            | Arctocepalus forsteri NC040023 28    | 0,18377231 |
| Ursus thibetanus mupinensis NC008779 1 | Puma concolor NC016470 22            | 0,18377335 |
| Ictonyx striatus T299 1                | Genetta servalina NC024568 2         | 0,18377346 |
| Mustela sibirica AP017394 11           | Melurus ursinus NC009970 2           | 0,18377428 |
| Viverricula indica XK891751 1          | Ailluropoda melanoleuca NC009492 5   | 0,18377532 |
| Puma concolor NC016470 22              | Lycya pictus NC028427 2              | 0,18377547 |
| Mustela frenata NC020640 1             | Melurus ursinus NC009970 2           | 0,18377551 |
| Taxidea taxus NC020646 1               | Parahyaena brunnea NC038159 15       | 0,18377846 |
| Lynx lynx NC027083 4                   | Helarctos malayanus NC009968 2       | 0,18378115 |
| Gallictis vittata T412 1               | Arctodus simus NC011116 1            | 0,18378174 |
| Ursus thibetanus thibetanus NC011118 4 | Genetta genetta T297 1               | 0,18378179 |
| Melogale moschata KP726273 1           | Arctocepalus forsteri NC040023 28    | 0,18378228 |
| Ursus thibetanus formosanus NC009333 1 | Felis margarita NC028308 1           | 0,18378228 |
| Melogale moschata NC020644 1           | Acinonyx jubatus NC005212 3          | 0,18378247 |
| Paguma larvata PDD511 2                | Martes flavigula NC021241 3          | 0,18378666 |
| Zalophus californianus NC008416 1      | Lynx rufus NC014456 3                | 0,18378931 |
| Martes martes T302 3                   | Canis lupus familiaris NC002008 1231 | 0,18379037 |
| Civettictis civetta NC033378 1         | Callorhinus ursinus NC008415 1       | 0,18379162 |
| Lynx canadensis NC028313 1             | Canis lupus familiaris NC002008 1231 | 0,18379357 |
| Nyctereutes procyonoides NC013700 3    | Civettictis civetta NC033778 1       | 0,18379702 |
| Eumetopias jubatus NC004030 10         | Bassaricyon neblina SRR1097850 1     | 0,18379724 |
| Lycalopex secureae KT448284 1          | Felis nigripes NC028309 1            | 0,18379788 |
| Ursus americanus JX196366 3            | Mustela eversmanni NC028013 1        | 0,1838004  |
| Vulpes zerda KJ603240 1                | Halichoerus grypus NC001602 2        | 0,18380322 |
| Leopardus geoffroyi NC028320 1         | Eumetopias jubatus NC004030 10       | 0,18380617 |
| Paradoxurus hermaphroditus NLNC 1      | Enhydra lutris NC009692 1            | 0,18380849 |
| Viverra zibetha T609 1                 | Lutra lutra LC050126 1               | 0,18381284 |
| Mustela frenata NC020640 1             | Eupleres goudotii D128 1             | 0,18381436 |
| Phocarcos hookeri NC008418 1           | Aillurus fulgens NC011124 1          | 0,18381596 |
| Meles leucurus NC039173 4              | Canis latrans NC008093 7             | 0,18381631 |
| Vulpes lagopus NC026529 3              | Salanoia concolor D378 1             | 0,18381743 |
| Lutrogale perspicillata NC035811 1     | Homotherium latidens MF871702 3      | 0,18381789 |
| Lutra lutra LC050126 1                 | Catopuma temminckii NC027115 41      | 0,18381937 |
| Martes martes T302 3                   | Cynictis penicillata T375 1          | 0,18381937 |
| Neovison vison NC020641 3              | Galerella sanguinea T378 1           | 0,18382365 |
| Taxidea taxus NC020646 1               | Eupleres goudotii D128 1             | 0,18382415 |
| Melogale moschata KP726273 1           | Genetta genetta T297 1               | 0,18382473 |
| Pardofelis marmorata NLN3 2            | Mustela eversmanni NC028013 1        | 0,18382494 |
| Paradoxurus hermaphroditus NC039591 1  | Mustela nigripes NC024942 1          | 0,18382537 |
| Tremarctos ornatus NC009969 2          | Civettictis civetta GLC19 1          | 0,18382569 |
| Civettictis civetta GLC19 1            | Canis anthus NC027956 2              | 0,18382576 |
| Tremarctos ornatus NC009969 2          | Lynx canadensis NC028313 1           | 0,18382595 |
| Genetta servalina NC024568 2           | Canis anthus NC027956 2              | 0,18382604 |
| Vulpes corsac NC023958 1               | Felis nigripes NC028309 1            | 0,18382648 |
| Vulpes corsac NC023958 1               | Felis silvestris Ibycia KP202275 4   | 0,18382674 |
| Prionailurus planiceps KY682741 4      | Melogale moschata V0735A 1           | 0,18382688 |
| Vulpes corsac NC023958 1               | Felis margarita NC028308 1           | 0,18382695 |
| Melogale moschata V0735A 1             | Leopardus tigrinus NC028317 1        | 0,18382703 |
| Mustela itatsi NC034330 19             | Genetta genetta T297 1               | 0,18382731 |
| Tremarctos ornatus NC009969 2          | Felis silvestris Ibycia KP202275 4   | 0,18382826 |
| Odocoileus manul NC028323 1            | Martes zibellina NC011579 39         | 0,18382849 |
| Ursus arctos GU573491 207              | Neophoca cinerea NC008419 1          | 0,18382924 |
| Viverricula indica XK891745 1          | Martes martes T302 3                 | 0,18382924 |
| Mirounga angustirostris SRR10331586    | Galidia elegans D146 1               | 0,18383028 |
| Ursus arctos GU573486 5                | Arctocepalus townsendi NC008420 1    | 0,1838305  |
| Viverricula indica XK891751 1          | Ursus arctos isabellinus 1885 2      | 0,18383281 |
| Viverra zibetha T609 1                 | Ursus maritimus GU573488 Svalbard    | 0,18383315 |
| Ursus arctos isabellinus 1885 2        | Civettictis civetta GLC19 1          | 0,18383329 |
| Mustela altaica NC021751 1             | Felis nigripes NC028309 1            | 0,18383341 |
| Ursus maritimus NC003428 31            | Civettictis civetta GLC19 1          | 0,18383358 |
| Prionailurus bengalensis CKM45 20      | Phocarcos hookeri NC008418 1         | 0,18383402 |

|                                        |                                      |            |
|----------------------------------------|--------------------------------------|------------|
| Mustela kathiah NC023210 1             | Arctonyx collaris NC020645 1         | 0,13521031 |
| Mustela kathiah NC023210 1             | Meles leucurus NC039173 4            | 0,13521215 |
| Poecilogale albinucha T602 1           | Mustela kathiah NC023210 1           | 0,13522188 |
| Mustela altaica NC021751 1             | Ictonyx striatus T299 1              | 0,135231   |
| Mustela itatsi NC034330 19             | Gulo gulo NC009685 3                 | 0,13524754 |
| Ursus thibetanus formosanus NC009331 1 | Tremarctos ornatus NC009969 2        | 0,1352638  |
| Gulo gulo NC009685 3                   | Arctonyx collaris NC020645 1         | 0,13530296 |
| Taxidea taxus NC020646 1               | Martes flavigula NC012141 3          | 0,13532342 |
| Vulpes lagopus NC026529 3              | Nyctereutes procyonoides NC013700 3  | 0,13539353 |
| Fossa fossana D350 1                   | Crossarchus platycephalus C7R66 1    | 0,13540263 |
| Martes zibellina NC011579 39           | Aonyx cinerea NC035814 2             | 0,13540615 |
| Meles leucurus NC039173 4              | Martes zibellina NC011579 39         | 0,13540615 |
| Prionailurus bengalensis CKM45 20      | Nandinia binotata NC024567 1         | 0,13541621 |
| Poecilogale albinucha T602 1           | Mustela nigripes NC024942 1          | 0,1354242  |
| Viverra tangalunga MH464792 1          | Ictonyx striatus T299 1              | 0,13542733 |
| Viverra tangalunga MH464792 1          | Martes flavigula NC012141 3          | 0,13544641 |
| Viverra tangalunga MH464792 1          | Martes zibellina NC011579 39         | 0,13548553 |
| Ursus americanus JX196366 3            | Arctotherium sp NC030174 1           | 0,13550007 |
| Vulpes vulpes NC008434 5               | Canis aureus KT448274 1              | 0,13550073 |
| Martes americana NC020642 1            | Lutrogale perspicillata NC035811 1   | 0,13554056 |
| Melogale moschata KP726273 1           | Lontra canadensis SRR10409165 1      | 0,13560805 |
| Neovison vison NC020641 3              | Meles anakuma NC009677 1             | 0,13561836 |
| Mustela nigripes NC024942 1            | Arctonyx collaris NC020645 1         | 0,13568184 |
| Mustela frenata NC020640 1             | Meles meles T303 3                   | 0,13568288 |
| Mustela frenata NC020640 1             | Aonyx cinerea NC035814 2             | 0,13568802 |
| Lontra canadensis SRR10409165 1        | Gulo gulo NC009685 3                 | 0,13571578 |
| Martes melampus NC009678 1             | Lutrogale perspicillata NC035811 1   | 0,13574247 |
| Mustela nigripes NC024942 1            | Lontra canadensis SRR10409165 1      | 0,13574773 |
| Martes americana NC020642 1            | Ictonyx striatus T299 1              | 0,13575539 |
| Vulpes corsac NC023958 1               | Canis lupus familiaris NC002008 1231 | 0,13575663 |
| Vulpes corsac NC023958 1               | Canis aureus KT448274 1              | 0,13577823 |
| Meles anakuma NC009677 1               | Martes flavigula NC012141 3          | 0,13577826 |
| Martes flavigula NC012141 3            | Lutrogale perspicillata NC035811 1   | 0,13579077 |
| Taxidea taxus NC020646 1               | Gulo gulo NC009685 3                 | 0,13579646 |
| Meles anakuma NC009677 1               | Martes americana NC020642 1          | 0,13580994 |
| Martes foina NC020643 1                | Lutrogale perspicillata NC035811 1   | 0,13581601 |
| Vulpes vulpes NC008434 5               | Canis lupus familiaris NC002008 1231 | 0,13582353 |
| Ursus maritimus GU573488 Svalbard      | Arctotherium sp NC030174 1           | 0,13588031 |
| Mustela sibirica NC020637 6            | Meles meles T303 3                   | 0,13588408 |
| Lutra lutra LC050126 1                 | Arctonyx collaris NC020645 1         | 0,13594455 |
| Meles anakuma NC009677 1               | Martes melampus NC009678 1           | 0,13594455 |
| Meles meles T303 3                     | Lutra sumatrana NC035810 1           | 0,13594455 |
| Mustela putorius NC020638 4            | Lontra canadensis SRR10409165 1      | 0,13594963 |
| Mustela sibirica NC020637 6            | Lontra canadensis SRR10409165 1      | 0,13601688 |
| Ursus arctos EU497665 29               | Arctodus simus NC011116 1            | 0,13601777 |
| Ursus maritimus GU573488 Svalbard      | Arctodus simus NC011116 1            | 0,13601777 |
| Melogale moschata NC020644 1           | Meles leucurus NC039173 4            | 0,13601899 |
| Poecilogale albinucha T602 1           | Enhydra lutris NC009692 1            | 0,1360234  |
| Poecilogale albinucha T602 1           | Lutra lutra NC011358 9               | 0,1360237  |
| Vulpes ferrilata NC027935 1            | Canis lupus familiaris NC002008 1231 | 0,13602592 |
| Melogale moschata NC020644 1           | Ictonyx striatus T299 1              | 0,13603204 |
| Taxidea taxus NC020646 1               | Martes americana NC020642 1          | 0,13603741 |
| Ursus thibetanus mupinensis NC008753 2 | Tremarctos ornatus NC009969 2        | 0,13606757 |
| Galidictis fasciata DM333 1            | Crossarchus platycephalus C7R66 1    | 0,13607832 |
| Melogale moschata NC020644 1           | Lutrogale perspicillata NC035811 1   | 0,13608463 |
| Mustela itatsi NC034330 19             | Meles leucurus NC039173 4            | 0,13608702 |
| Ursus arctos GU573486 5                | Arctotherium sp NC030174 1           | 0,13608782 |
| Ursus arctos GU573486 5                | Arctodus simus NC011116 1            | 0,13609089 |
| Mustela altaica NC021751 1             | Aonyx cinerea NC035814 2             | 0,13609684 |
| Mustela kathiah NC023210 1             | Ictonyx striatus T299 1              | 0,13610005 |
| Otocyon megalotis SAF1 2               | Canis latrans NC008093 7             | 0,13614045 |
| Nandinia binotata NC024567 1           | Catopuma badia NC028300 1            | 0,13615158 |
| Mustela eversmannii NC028013 1         | Lontra canadensis SRR10409165 1      | 0,13615172 |
| Poecilogale albinucha T602 1           | Mustela altaica NC021751 1           | 0,13617051 |
| Paguma larvata PDD511 2                | Cynogale bennetti KY117544 1         | 0,13619801 |
| Meles anakuma NC009677 1               | Martes zibellina NC011579 39         | 0,13621375 |
| Ursus maritimus NC003428 31            | Arctotherium sp NC030174 1           | 0,13621698 |
| Mustela itatsi NC034330 19             | Melogale moschata V0735A 1           | 0,13622557 |
| Poecilogale albinucha T602 1           | Lutra sumatrana NC035810 1           | 0,13622564 |
| Mustela sibirica NC020637 6            | Aonyx cinerea NC035814 2             | 0,136226   |
| Ursus arctos EU497665 29               | Arctotherium sp NC030174 1           | 0,1362844  |
| Melogale moschata NC020644 1           | Meles anakuma NC009677 1             | 0,13628815 |
| Meles anakuma NC009677 1               | Martes martes T302 3                 | 0,13628855 |
| Mustela putorius NC020638 4            | Aonyx cinerea NC035814 2             | 0,13629305 |
| Mustela nivalis T306 5                 | Aonyx cinerea NC035814 2             | 0,13629866 |
| Martes foina NC020643 1                | Ictonyx striatus T299 1              | 0,13630426 |
| Vulpes vulpes NC008434 5               | Canis latrans NC008093 7             | 0,13633609 |
| Vulpes zerda K1603240 1                | Canis latrans NC008093 7             | 0,13633609 |
| Martes martes T302 3                   | Lutrogale perspicillata NC035811 1   | 0,13635615 |
| Ictonyx striatus T299 1                | Arctonyx collaris NC020645 1         | 0,13636389 |
| Urva brachyura KY117547 1              | Fossa fossana D350 1                 | 0,13641261 |
| Lutra lutra NC011358 9                 | Arctonyx collaris NC020645 1         | 0,13641565 |
| Mustela sibirica AP017394 11           | Meles meles T303 3                   | 0,13642254 |
| Viverricula indica XK891745 1          | Prionailurus bengalensis NC028301 12 | 0,13642465 |
| Poecilogale albinucha T602 1           | Mustela sibirica NC020637 6          | 0,13643372 |
| Vulpes lagopus NC026529 3              | Otocyon megalotis SAF1 2             | 0,13647892 |
| Mungos mungo MMMC7 1                   | Fossa fossana D350 1                 | 0,1364826  |
| Ursus maritimus NC003428 31            | Arctodus simus NC011116 1            | 0,13648912 |
| Mustela nivalis T306 5                 | Melogale moschata V0735A 1           | 0,13649999 |
| Otocyon megalotis SAF1 2               | Canis adustus KT448271 1             | 0,13652189 |
| Lutra sumatrana NC035810 1             | Arctonyx collaris NC020645 1         | 0,13655023 |
| Melogale moschata KP726273 1           | Arctonyx collaris NC020645 1         | 0,13655023 |
| Mustela sibirica AP017394 11           | Lontra canadensis SRR10409165 1      | 0,13655534 |
| Mustela itatsi NC034330 19             | Arctonyx collaris NC020645 1         | 0,13655666 |
| Melogale moschata NC020644 1           | Arctonyx collaris NC020645 1         | 0,13655764 |
| Ursus arctos pruinosus MG066703 3      | Arctodus simus NC011116 1            | 0,13656498 |
| Taxidea taxus NC020646 1               | Lutra sumatrana NC035810 1           | 0,13656858 |
| Vulpes lagopus NC026529 3              | Canis aureus KT448274 1              | 0,13658413 |
| Vulpes corsac NC023958 1               | Canis latrans NC008093 7             | 0,1366054  |
| Urocyon cinereoargenteus NC026723 21   | Canis adustus KT448271 1             | 0,13661675 |
| Ursus arctos GU573491 207              | Arctotherium sp NC030174 1           | 0,13662091 |
| Nyctereutes procyonoides NC013700 3    | Canis mesomelas KT448280 1           | 0,13662739 |

|                                        |                                       |            |
|----------------------------------------|---------------------------------------|------------|
| Ictonyx striatus T299 1                | Galidictis fasciata DM333 1           | 0,18383595 |
| Ursus arctos GU573491 207              | Poecilogale albinucha T602 1          | 0,18383726 |
| Zalophus californianus NC008416 1      | Chrotogale owstoni T607 1             | 0,18383755 |
| Mustela sibirica AP017394 11           | Arctictis binturong T605 2            | 0,18383886 |
| Ursus thibetanus mupinensis NC008753 2 | Leopardus jacobita NC028322 1         | 0,18384007 |
| Enhydra lutris NC009692 1              | Arctocepalus forsteri NC004023 28     | 0,1838402  |
| Ursus thibetanus mupinensis NC008753 2 | Poecilogale albinucha T602 1          | 0,18384106 |
| Ursus thibetanus thibetanus NC011118 8 | Galidictis fasciata DM333 1           | 0,18384194 |
| Mustela putorius NC020638 4            | Arctocepalus forsteri NC004023 28     | 0,1838426  |
| Zalophus wolfebaeki SRR4431565 1       | Leopardus pardalis NC028315 1         | 0,18384425 |
| Ursus thibetanus mupinensis NC008753 2 | Prionailurus bengalensis CKM45 20     | 0,18384472 |
| Mustela itatsi NC034330 19             | Helarctos malayanus NC009968 2        | 0,18384531 |
| Phocartos hookeri NC008418 1           | Acinonyx jubatus NC005212 3           | 0,18384618 |
| Viverra zibetha T609 1                 | Ursus arctos AP012576 6               | 0,18384714 |
| Nyctereutes procyonoides NC013700 3    | Leopardus colocolo NC028314 1         | 0,18384872 |
| Meles anakuma NC009677 1               | Urva javanica/auropunctata NC006835 1 | 0,18384932 |
| Canis lupus familiaris NC002008 1231   | Arctonyx collaris NC020645 1          | 0,18385102 |
| Zalophus wolfebaeki SRR4431565 1       | Ursus arctos AP012576 6               | 0,1838516  |
| Prionailurus planiceps NC028312 6      | Chrysocyon brachyurus NC024172 1      | 0,18385237 |
| Ursus thibetanus formosanus NC009331 1 | Leopardus guigna NC028321 1           | 0,18385343 |
| Urva javanica/auropunctata NC006835 1  | Bassariscus sumichrasti SRX1099089 1  | 0,18385643 |
| Prionailurus planiceps NC028312 6      | Canis lupus familiaris NC002008 1231  | 0,18386132 |
| Eumetopias jubatus NC004030 10         | Conepatus chinga NC042596 1           | 0,18386377 |
| Gulo gulo NC009685 3                   | Felis catus NC001700 2                | 0,18386824 |
| Martes pennanti NC020664 16            | Canis lupus chanco NC010340 4         | 0,18386908 |
| Gulo gulo NC009685 3                   | Felis chaus NC028307 1                | 0,18386926 |
| Enhydra lutris NC009692 1              | Arctocepalus australis MG023139 1     | 0,18387483 |
| Mustela putorius NC020638 4            | Chrotogale owstoni T607 1             | 0,1838765  |
| Meles meles T303 3                     | Atilax paludinosus T606 1             | 0,18387757 |
| Viverricula indica XK891751 1          | Lutra lutra LC050126 1                | 0,18387817 |
| Melogale moschata V0735A 1             | Urva semitorquata MH464789 1          | 0,18387829 |
| Lutra sumatrana NC035810 1             | Galidictis fasciata DM333 1           | 0,18388048 |
| Pusa caspica NC008431 1                | Prionodon linsleyi ERR2391707 1       | 0,18388095 |
| Mustela kathiah NC023210 1             | Cynictis penicillata T375 1           | 0,18388107 |
| Mephitis mephitis NC020648 1           | Canis adustus KT448271 1              | 0,18388262 |
| Mustela altaica NC021751 1             | Chrotogale owstoni T607 1             | 0,18388273 |
| Meles meles T303 3                     | Canis latrans NC008093 7              | 0,18388285 |
| Ursus thibetanus formosanus NC009331 1 | Canis adustus KT448271 1              | 0,18388285 |
| Civettictis civetta NC033378 1         | Chrysocyon brachyurus NC024172 1      | 0,18388312 |
| Procyon lotor AB462049 4               | Arctocepalus gazella BK010918 1       | 0,18388316 |
| Vulpes ferrilata NC027935 1            | Mustela frenata NC020640 1            | 0,18388402 |
| Mustela eversmannii NC028013 1         | Canis latrans NC008093 7              | 0,18388566 |
| Eupleres goudotii D128 1               | Arctotherium sp NC030174 1            | 0,1838868  |
| Lutra lutra NC011358 9                 | Felis margarita NC028308 1            | 0,18388775 |
| Fossa fossana D350 1                   | Arctotherium sp NC030174 1            | 0,18388815 |
| Prionodon pardicolor NC024569 2        | Martes melampus NC009678 1            | 0,18388882 |
| Martes melampus NC009678 1             | Lycan pictus NC028427 2               | 0,18388888 |
| Cynictis penicillata T375 1            | Canis aureus KT448274 1               | 0,18388893 |
| Prionodon pardicolor NC024569 2        | Mustela frenata NC020640 1            | 0,1838918  |
| Paradoxurus hermaphroditus NC03959 1   | Mustela putorius NC020638 4           | 0,18389224 |
| Mustela eversmannii NC028013 1         | Felis catus NC001700 2                | 0,18389271 |
| Ursus arctos GU573491 207              | Enhydra lutris NC009692 1             | 0,18389286 |
| Martes foina NC020643 1                | Eupleres goudotii D128 1              | 0,18389361 |
| Vulpes corsac NC023958 1               | Felis chaus NC028307 1                | 0,18389387 |
| Vulpes lagopus NC026529 3              | Felis silvestris Ibyca KP202275 4     | 0,18389413 |
| Martes foina NC020643 1                | Canis latrans NC008093 7              | 0,18389463 |
| Mustela altaica NC021751 1             | Arctocepalus pusillus NC008417 1      | 0,18389481 |
| Prionailurus bengalensis NC028301 12   | Arctocepalus gazella BK010918 1       | 0,18389492 |
| Prionodon pardicolor NC024569 2        | Mustela sibirica NC020637 6           | 0,18389544 |
| Galerella sanguinea T378 1             | Canis aureus KT448274 1               | 0,18389544 |
| Nyctereutes procyonoides NC013700 3    | Lynx pardinus NC028319 161            | 0,18389656 |
| Mustela putorius NC020638 4            | Lycan pictus NC028427 2               | 0,18389703 |
| Mustela itatsi NC034330 19             | Lycan pictus NC028427 2               | 0,18389794 |
| Paguma larvata PDD511 2                | Arctotherium sp NC030174 1            | 0,18389837 |
| Poecilogale albinucha T602 1           | Felis silvestris Ibyca KP202275 4     | 0,18390022 |
| Leopardus geoffroyi NC028320 1         | Canis latrans NC008093 7              | 0,18390065 |
| Mustela eversmannii NC028013 1         | Chrysocyon brachyurus NC024172 1      | 0,18390203 |
| Leopardus guigna NC028321 1            | Arctocepalus pusillus NC008417 1      | 0,1839021  |
| Leptailurus serval NC028316 1          | Aonyx cinerea NC035814 2              | 0,18390225 |
| Mustela sibirica NC020637 6            | Chrysocyon brachyurus NC024172 1      | 0,1839027  |
| Zalophus wolfebaeki SRR4431565 1       | Lutrogale perspicillata NC035811 1    | 0,18390299 |
| Zalophus wolfebaeki SRR4431565 1       | Prionailurus planiceps KY682741 4     | 0,18391018 |
| Smiñodon populator MF871700 1          | Mustela putorius NC020638 4           | 0,1839136  |
| Ursus spelaeus NC011112 8              | Genetta servalina NC024568 2          | 0,18391456 |
| Zalophus wolfebaeki SRR4431565 1       | Prionailurus bengalensis CKM45 20     | 0,18391486 |
| Ursus spelaeus EU327344 13             | Bassariscus sumichrasti SRX1099089 1  | 0,18391524 |
| Meles leucurus NC039173 4              | Urva javanica/auropunctata NC006835 1 | 0,18391682 |
| Ursus thibetanus thibetanus NC011118 8 | Lynx lynx NC027083 4                  | 0,18391715 |
| Ursus spelaeus NC011112 8              | Leopardus pardalis T262 1             | 0,1839186  |
| Poecilogale albinucha T602 1           | Leopardus colocolo NC028314 1         | 0,18392004 |
| Ursus spelaeus NC011112 8              | Profelis aurata NC028299 1            | 0,1839202  |
| Mephitis mephitis NC020648 1           | Martes foina NC020643 1               | 0,18392031 |
| Prionailurus rubiginosus NC028304 2    | Helarctos malayanus NC009968 2        | 0,18392038 |
| Vulpes ferrilata NC027935 1            | Hemigalus derbyanus MH464791 1        | 0,18392418 |
| Zalophus californianus NC008416 1      | Puma yagouaroundi NC028311 1          | 0,18392563 |
| Neovison vison NC020641 3              | Ailuropoda melanoleuca NC009492 5     | 0,18392633 |
| Prionailurus bengalensis CKM45 20      | Chrysocyon brachyurus NC024172 1      | 0,183927   |
| Otocyon megalotis SAF1 2               | Monachus monachus NC044972 5          | 0,18392803 |
| Speothos venaticus C48 2               | Monachus monachus NC044972 5          | 0,18393047 |
| Taxidea taxus NC020646 1               | Canis lupus chanco NC010340 4         | 0,18393441 |
| Viverricula indica NC025296 2          | Ursus americanus JX196366 3           | 0,18393643 |
| Vulpes corsac NC023958 1               | Halichoerus grypus NC001602 2         | 0,18393701 |
| Genetta abyssinica MG489822 1          | Eumetopias jubatus NC004030 10        | 0,18393962 |
| Mungos mungo MMMC7 1                   | Lutra lutra LC050126 1                | 0,18394022 |
| Prionailurus viverrinus NC028305 1     | Eumetopias jubatus NC004030 10        | 0,18394296 |
| Mustela itatsi NC034330 19             | Arctocepalus forsteri KT693377 17     | 0,18394552 |
| Meles anakuma NC009677 1               | Urva javanica T413 1                  | 0,18394573 |
| Phocartos hookeri NC008418 1           | Mustela putorius NC020638 4           | 0,18394788 |
| Potos flavus T414 1                    | Cynictis penicillata T375 1           | 0,18394865 |
| Spilogale putorius NC010497 1          | Ictonyx striatus T299 1               | 0,18394914 |
| Urva semitorquata MH464789 1           | Canis latrans NC008093 7              | 0,18394929 |
| Vulpes lagopus NC026529 3              | Fossa fossana D350 1                  | 0,18394952 |
| Vulpes corsac NC023958 1               | Nandinia binotata NC024567 1          | 0,18394953 |



|                                          |                                      |            |
|------------------------------------------|--------------------------------------|------------|
| Mustela sibirica AP017394 11             | Aonyx cinerea NC035814 2             | 0,13662961 |
| Martes flavigula NC012141 3              | Ictonyx striatus T299 1              | 0,13667524 |
| Melogale moschata V0735A 1               | Lutrogale perspicillata NC035811 1   | 0,13668418 |
| Mustela sibirica NC020637 6              | Meles leucurus NC039173 4            | 0,13669224 |
| Vulpes zerda K1603240 1                  | Canis aureus KT448274 1              | 0,13669686 |
| Poecilogale albinucha T602 1             | Mustela sibirica AP017394 11         | 0,13670279 |
| Enhydra lutris NC009692 1                | Arctonyx collaris NC020645 1         | 0,13675214 |
| Meles leucurus NC039173 4                | Lutra sumatrana NC035810 1           | 0,13675214 |
| Mustela nigripes NC024942 1              | Meles meles T303 3                   | 0,13675921 |
| Mustela itatsi NC034330 19               | Meles meles T303 3                   | 0,13675953 |
| Mustela nigripes NC024942 1              | Meles leucurus NC039173 4            | 0,13675971 |
| Mustela nivalis T306 5                   | Lontra canadensis SRR10409165 1      | 0,13676293 |
| Ursus arctos AP012576 6                  | Arctodus simus NC011116 1            | 0,136765   |
| Taxidea taxus NC020646 1                 | Martes pennanti NC020664 16          | 0,13676673 |
| Viverra tangalunga MH464792 1            | Poecilogale albinucha T602 1         | 0,13677077 |
| Poecilogale albinucha T602 1             | Mustela itatsi NC034330 19           | 0,13683763 |
| Tremarctos ornatus NC009969 2            | Helarctos malayanus NC009968 2       | 0,13687734 |
| Nandinia binotata NC024567 1             | Felis silvestris lybica KP202275 4   | 0,13689408 |
| Mustela nigripes NC024942 1              | Aonyx cinerea NC035814 2             | 0,13689893 |
| Viverra zibetha T609 1                   | Catopuma badia NC028300 1            | 0,13690002 |
| Martes pennanti NC020664 16              | Ictonyx striatus T299 1              | 0,13691074 |
| Urocyon littoralis catalinae KP129018 15 | Canis adustus KT448271 1             | 0,13693956 |
| Mustela sibirica AP017394 11             | Arctonyx collaris NC020645 1         | 0,13696063 |
| Mustela sibirica AP017394 11             | Meles leucurus NC039173 4            | 0,13696145 |
| Poecilogale albinucha T602 1             | Mustela putorius NC020638 4          | 0,13697219 |
| Salanoia concolor D378 1                 | Crossarchus platycephalus C7R66 1    | 0,13702086 |
| Meles meles T303 3                       | Lutra lutra LC050126 1               | 0,13702133 |
| Ursus arctos pruinusos MG066703 3        | Arctotherium sp NC030174 1           | 0,13703083 |
| Mustela kathiah NC023210 1               | Aonyx cinerea NC035814 2             | 0,13703389 |
| Viverra zibetha T609 1                   | Prionailurus bengalensis CKM45 20    | 0,13703421 |
| Vulpes lagopus NC026529 3                | Canis latrans NC008093 7             | 0,13707669 |
| Tremarctos ornatus NC009969 2            | Melursus ursinus NC009970 2          | 0,13708828 |
| Mustela putorius NC020638 4              | Meles leucurus NC039173 4            | 0,13709671 |
| Poecilogale albinucha T602 1             | Arctonyx collaris NC020645 1         | 0,13709891 |
| Ursus arctos AP012576 6                  | Arctotherium sp NC030174 1           | 0,13712032 |
| Nyctereutes procyonoides NC013700 3      | Canis aureus KT448274 1              | 0,13711531 |
| Vulpes ferrillata NC027935 1             | Canis latrans NC008093 7             | 0,13714401 |
| Vulpes vulpes NC008434 5                 | Nyctereutes procyonoides NC013700 3  | 0,13714401 |
| Fossa fossana D350 1                     | Cynictis penicillata T375 1          | 0,13715324 |
| Melogale moschata KP726273 1             | Meles leucurus NC039173 4            | 0,13715594 |
| Viverra tangalunga MH464792 1            | Melogale moschata NC020644 1         | 0,13716854 |
| Genetta genetta T297 1                   | Diplogale hosei MH464790 1           | 0,13717189 |
| Mustela nivalis T306 5                   | Lutrogale perspicillata NC035811 1   | 0,13717356 |
| Mustela sibirica NC020637 6              | Arctonyx collaris NC020645 1         | 0,13722976 |
| Ichneumia albicauda T603 1               | Fossa fossana D350 1                 | 0,13723078 |
| Ictonyx striatus T299 1                  | Aonyx cinerea NC035814 2             | 0,13723585 |
| Mustela altaica NC021751 1               | Lontra canadensis SRR10409165 1      | 0,13730121 |
| Viverra tangalunga MH464792 1            | Aonyx cinerea NC035814 2             | 0,13730311 |
| Prionailurus rubiginosus NC028304 2      | Nandinia binotata NC024567 1         | 0,13736521 |
| Vulpes zerda K1603240 1                  | Canis lupus familiaris NC002008 1231 | 0,13737629 |
| Nandinia binotata NC024567 1             | Lynx lynx NC027083 4                 | 0,13743198 |
| Melogale moschata NC020644 1             | Meles meles T303 3                   | 0,13743249 |
| Viverra tangalunga MH464792 1            | Melogale moschata KP726273 1         | 0,13743691 |
| Viverricula indica NC025296 2            | Prionailurus bengalensis NC028301 12 | 0,13743792 |
| Urva semitorquata MH464789 1             | Galidictis fasciata DM333 1          | 0,13749282 |
| Vulpes ferrillata NC027935 1             | Canis aureus KT448274 1              | 0,13752396 |
| Meles leucurus NC039173 4                | Gulo gulo NC009685 3                 | 0,13752571 |
| Viverra zibetha T609 1                   | Cynogale bennetti KY117544 1         | 0,13754736 |
| Fossa fossana D350 1                     | Bdeogale nigripes GLC15 1            | 0,13755724 |
| Leopardus colocolo NC028314 1            | Civettictis civetta GLC19 1          | 0,13758628 |
| Helogale parvula SRR7637809 1            | Fossa fossana D350 1                 | 0,13762456 |
| Meles meles T303 3                       | Lutra lutra LC050126 1               | 0,13762702 |
| Melogale moschata KP726273 1             | Meles meles T303 3                   | 0,13762702 |
| Mustela putorius NC020638 4              | Arctonyx collaris NC020645 1         | 0,13763358 |
| Mustela kathiah NC023210 1               | Meles meles T303 3                   | 0,13763449 |
| Civettictis civetta GLC19 1              | Catopuma badia NC028300 1            | 0,13763981 |
| Vulpes lagopus NC026529 3                | Canis lupus familiaris NC002008 1231 | 0,13764131 |
| Taxidea taxus NC020646 1                 | Lutra lutra LC050126 1               | 0,13764514 |
| Lontra canadensis SRR10409165 1          | Ictonyx striatus T299 1              | 0,13764893 |
| Poecilogale albinucha T602 1             | Mustela nivalis T306 5               | 0,13765147 |
| Melogale moschata KP726273 1             | Meles anakuma NC009677 1             | 0,13769433 |
| Martes pennanti NC020664 16              | Arctonyx collaris NC020645 1         | 0,13770416 |
| Viverra zibetha T609 1                   | Prionailurus rubiginosus NC028304 2  | 0,13770434 |
| Martes pennanti NC020664 16              | Aonyx cinerea NC035814 2             | 0,13770546 |
| Poecilogale albinucha T602 1             | Mustela eversmanni NC028013 1        | 0,13771249 |
| Melogale moschata V0735A 1               | Meles leucurus NC039173 4            | 0,13776162 |
| Mustela itatsi NC034330 19               | Meles anakuma NC009677 1             | 0,13776776 |
| Mustela eversmanni NC028013 1            | Arctonyx collaris NC020645 1         | 0,13776839 |
| Mustela eversmanni NC028013 1            | Meles leucurus NC039173 4            | 0,13776913 |
| Viverra tangalunga MH464792 1            | Gulo gulo NC009685 3                 | 0,13780534 |
| Nyctereutes procyonoides NC013700 3      | Canis lupus familiaris NC002008 1231 | 0,13784593 |
| Vulpes vulpes NC008434 5                 | Canis lupus chanco NC010340 4        | 0,13785121 |
| Poecilogale albinucha T602 1             | Martes martes T302 3                 | 0,1378521  |
| Ursus arctos isabellinus 1885 2          | Tremarctos ornatus NC009969 2        | 0,13789116 |
| Melogale moschata V0735A 1               | Arctonyx collaris NC020645 1         | 0,13789622 |
| Salanoia concolor D378 1                 | Urva semitorquata MH464789 1         | 0,1378964  |
| Viverra zibetha T609 1                   | Prionailurus viverrinus NC028305 1   | 0,13790634 |
| Taxidea taxus NC020646 1                 | Enhydra lutris NC009692 1            | 0,13791415 |
| Lobodon carcinophaga NC008423 1          | Eumetopias jubatus NC004030 10       | 0,13793579 |
| Ictonyx striatus T299 1                  | Gulo gulo NC009685 3                 | 0,13794485 |
| Suricata suricatta SSM10 1               | Fossa fossana D350 1                 | 0,13796122 |
| Melogale moschata V0735A 1               | Meles anakuma NC009677 1             | 0,13796352 |
| Mustela kathiah NC023210 1               | Meles anakuma NC009677 1             | 0,13796929 |
| Mustela sibirica NC020637 6              | Meles anakuma NC009677 1             | 0,1379697  |
| Cryptoprocta ferox FC13 1                | Crossarchus platycephalus C7R66 1    | 0,13796977 |
| Nandinia binotata NC024567 1             | Felis margarita NC028308 1           | 0,13797162 |
| Meles anakuma NC009677 1                 | Martes pennanti NC020664 16          | 0,1379737  |
| Mustela itatsi NC034330 19               | Aonyx cinerea NC035814 2             | 0,13797617 |
| Mustela nivalis T306 5                   | Meles leucurus NC039173 4            | 0,13797709 |
| Mungotictis decemlineata NC027828 1      | Crossarchus platycephalus C7R66 1    | 0,13803066 |
| Salanoia concolor D378 1                 | Xenogale naso C07XAR110 1            | 0,13803151 |
| Nandinia binotata NC024567 1             | Leopardus pardalis T262 1            | 0,13804035 |
| Viverra zibetha T609 1                   | Prionailurus bengalensis NC028301 12 | 0,13804089 |

|                                          |                                      |            |
|------------------------------------------|--------------------------------------|------------|
| Nyctereutes procyonoides NC013700 3      | Meles meles T303 3                   | 0,18395033 |
| Nasua nasua NC020647 1                   | Mustela nivalis T306 5               | 0,18395118 |
| Mustela sibirica AP017394 11             | Diplogale hosei MH464790 1           | 0,18395254 |
| Ichneumia albicauda T603 1               | Canis latrans NC008093 7             | 0,18395276 |
| Ursus arctos pruinusos MG066703 3        | Taxidea taxus NC020646 1             | 0,18395574 |
| Tremarctos ornatus NC009969 2            | Genetta servalina NC024568 2         | 0,18395665 |
| Salanoia concolor D378 1                 | Martes pennanti NC020664 16          | 0,18395704 |
| Ommatophoca rossii AY377287etc 1         | Xenogale naso C07XAR110 1            | 0,18395722 |
| Ursus maritimus GU573488 Svalbard        | Arctocepalus townsendi NC008420 1    | 0,18395858 |
| Mungos mungo/gambianus SRR77048          | Martes foina NC020643 1              | 0,18395969 |
| Ursus thibetanus mupiniensis NC00875     | Melogale moschata V0735A 1           | 0,18395998 |
| Mustela nigripes NC024942 1              | Felis chaus NC028307 1               | 0,18396127 |
| Vulpes ferrillata NC027935 1             | Phoca largha NC008430 1              | 0,18396175 |
| Tremarctos ornatus NC009969 2            | Leopardus tigrinus NC028317 1        | 0,18396187 |
| Prionodon pardicor NC024569 2            | Mustela nigripes NC024942 1          | 0,1839626  |
| Leopardus geoffroyi NC028320 1           | Arctocepalus forsteri KT693377 17    | 0,18396373 |
| Vulpes vulpes NC008434 5                 | Catopuma temminckii NC027115 41      | 0,18396413 |
| Prionailurus planiceps KY682741 4        | Nyctereutes procyonoides NC013700 3  | 0,18396452 |
| Urocyon cinereogargenteus NC026723 2     | Mirounga angustirostris SRR10331586  | 0,18396494 |
| Lynx pardinus NC028319 161               | Aonyx cinerea NC035814 2             | 0,18396619 |
| Viverra zibetha T609 1                   | Ursus maritimus NC003428 31          | 0,18396786 |
| Ursus thibetanus mupiniensis NC00875     | Otaria byronia OTAB 1                | 0,18396938 |
| Speothos venaticus C48 2                 | Phoca groenlandica NC008429 54       | 0,18396978 |
| Taxidea taxus NC020646 1                 | Lycaon pictus NC028427 2             | 0,18396987 |
| Panthera uncia NC010638 1                | Mirounga angustirostris SRR10331586  | 0,18397008 |
| Lutra lutra LC050126 1                   | Helarctos malayanus NC009968 2       | 0,18397038 |
| Smilodon populator MF871700 1            | Melursus ursinus NC009970 2          | 0,18397042 |
| Mephitis mephitis NC020648 1             | Homotherium latidens MF871702 3      | 0,18397157 |
| Smilodon populator MF871700 1            | Mustela sibirica AP017394 11         | 0,18397179 |
| Mustela nigripes NC024942 1              | Arctictis binturong T605 2           | 0,18397419 |
| Panthera tigris NC010642 35              | Ommatophoca rossii AY377287etc 1     | 0,18397497 |
| Mustela sibirica NC020637 6              | Helarctos malayanus NC009968 2       | 0,1839765  |
| Zalophus wolfebaeki SRR4431565 1         | Lynx canadensis NC028313 1           | 0,18397653 |
| Mustela itatsi NC034330 19               | Arctocepalus forsteri NC040023 28    | 0,18397672 |
| Arctocepalus gazella BK010918 1          | Acinonyx jubatus NC005212 3          | 0,18397807 |
| Panthera onca NC022842 1                 | Melogale moschata NC020644 1         | 0,18397978 |
| Ursus thibetanus thibetanus NC011113     | Aonyx cinerea NC035814 2             | 0,18398072 |
| Neophoca cinerea NC008419 1              | Acinonyx jubatus NC005212 3          | 0,18398114 |
| Viverricula indica NC025296 2            | Ursus spelaeus EU327344 13           | 0,1839837  |
| Ursus spelaeus NC011112 8                | Lynx lynx NC027083 4                 | 0,18398428 |
| Ursus thibetanus thibetanus NC011113     | Paguma larvata PD0511 2              | 0,18398435 |
| Ursus spelaeus EU327344 13               | Puma yagouaroundi NC028311 1         | 0,18398497 |
| Martes pennanti NC020664 16              | Leopardus colocolo NC028314 1        | 0,18398653 |
| Urocyon littoralis catalinae KP129018 15 | Monachus monachus NC044972 5         | 0,18398985 |
| Zalophus californianus NC008416 1        | Civettictis civetta GLC19 1          | 0,18399192 |
| Zalophus californianus NC008416 1        | Prionailurus planiceps NC028312 6    | 0,18399213 |
| Leptailurus serval NC028316 1            | Gulo gulo NC009685 3                 | 0,18400167 |
| Ursus americanus JX196366 3              | Mustela itatsi NC034330 19           | 0,18400295 |
| Martes pennanti NC020664 16              | Civettictis civetta NC033378 1       | 0,184003   |
| Panthera pardus NC010641 5               | Mustela erminea T305 2               | 0,1840038  |
| Lycalopex schuareze KT448284 1           | Felis chaus NC028307 1               | 0,18400384 |
| Otocyon megalotis SAF1 2                 | Homotherium latidens MF871702 3      | 0,18400723 |
| Chrotogale owstoni T607 1                | Arctocepalus gazella BK010918 1      | 0,18400736 |
| Viverricula indica XK891751 1            | Tapirus terrestris T358              | 0,18400805 |
| Prionailurus rubiginosus NC028304 2      | Tapirus terrestris T358              | 0,18400949 |
| Urva brachyura KY117547 1                | Callorhinus ursinus NC008415 1       | 0,18401153 |
| Callorhinus ursinus NC008415 1           | Bdeogale nigripes GLC15 1            | 0,18401241 |
| Meles meles T303 3                       | Urva brachyura KY117547 1            | 0,18401301 |
| Leptailurus serval NC028316 1            | Tapirus terrestris T358              | 0,1840148  |
| Mustela nivalis T306 5                   | Diplogale hosei MH464790 1           | 0,18401505 |
| Mustela frenata NC020640 1               | Bdeogale nigripes GLC15 1            | 0,18401565 |
| Mustela itatsi NC034330 19               | Urva javanica T413 1                 | 0,18401597 |
| Vulpes lagopus NC026529 3                | Crossarchus platycephalus C7R66 1    | 0,18401684 |
| Xenogale naso C07XAR110 1                | Bassariscus sumichrasti SRR1099089 1 | 0,18401927 |
| Catopuma badia NC028300 1                | Tapirus terrestris T358              | 0,18402037 |
| Mustela frenata NC020640 1               | Mungotictis decemlineata NC027828 1  | 0,18402253 |
| Leopardus tigrinus NC028317 1            | Ailurus fulgens NC011124 1           | 0,18402311 |
| Viverra zibetha T609 1                   | Arctocepalus gazella BK010918 1      | 0,1840236  |
| Martes americana NC020642 1              | Genetta servalina NC024568 2         | 0,18402386 |
| Tremarctos ornatus NC009969 2            | Galerella sanguinea T378 1           | 0,18402502 |
| Ursus arctos isabellinus 1885 2          | Arctocepalus australis MG023139 1    | 0,18402626 |
| Ursus maritimus GU573488 Svalbard        | Arctocepalus forsteri KT693377 17    | 0,18402655 |
| Potos flavus T414 1                      | Felis chaus NC028307 1               | 0,18402763 |
| Vulpes lagopus NC026529 3                | Felis nigripes NC028309 1            | 0,18402861 |
| Ictonyx striatus T299 1                  | Arctocepalus townsendi NC008420 1    | 0,18402864 |
| Ictonyx striatus T299 1                  | Chrotogale owstoni T607 1            | 0,18402889 |
| Viverricula indica XK891745 1            | Martes pennanti NC020664 16          | 0,18402895 |
| Vulpes lagopus NC026529 3                | Felis margarita NC028308 1           | 0,18402909 |
| Viverra zibetha T609 1                   | Nyctereutes procyonoides NC013700 3  | 0,18402965 |
| Lynx pardinus NC028319 161               | Lontra canadensis SRR10409165 1      | 0,18403007 |
| Phocarcos hookeri NC008418 1             | Lynx canadensis NC028313 1           | 0,18403022 |
| Felis margarita NC028308 1               | Canis anthus NC027956 2              | 0,1840314  |
| Ursus arctos pruinusos MG066703 3        | Mustela frenata NC020640 1           | 0,18403167 |
| Genetta servalina NC024568 2             | Arctocepalus pusillus NC008417 1     | 0,18403199 |
| Mustela altaica NC021751 1               | Genetta servalina NC024568 2         | 0,18403204 |
| Otocolobus manul NC028323 1              | Nyctereutes procyonoides NC013700 3  | 0,18403284 |
| Neophoca cinerea NC008419 1              | Leopardus wiedii NC028318 1          | 0,18403311 |
| Mustela altaica NC021751 1               | Felis chaus NC028307 1               | 0,18403517 |
| Catopuma temminckii NC027115 41          | Canis anthus NC027956 2              | 0,18403532 |
| Lynx pardinus NC028319 161               | Arctotherium sp NC030174 1           | 0,18403554 |
| Panthera onca NC022842 1                 | Enhydra lutris NC009692 1            | 0,18403587 |
| Prionailurus planiceps NC028312 6        | Arctotherium sp NC030174 1           | 0,18403643 |
| Martes pennanti NC020664 16              | Leopardus guigna NC028321 1          | 0,18403718 |
| Otaria byronia OTAB 1                    | Leopardus pardalis NC028315 1        | 0,18403731 |
| Otocyon megalotis SAF1 2                 | Lynx lynx NC027083 4                 | 0,18403809 |
| Ursus arctos pruinusos MG066703 3        | Ailurus fulgens NC011124 1           | 0,18403839 |
| Procyon lotor AB462046 3                 | Catopuma temminckii NC027115 41      | 0,18403855 |
| Catopuma temminckii NC027115 41          | Arctotherium sp NC030174 1           | 0,18403912 |
| Martes foina NC020643 1                  | Genetta genetta T297 1               | 0,18403971 |
| Zalophus wolfebaeki SRR4431565 1         | Prionailurus viverrinus NC028305 1   | 0,18404021 |
| Ursus arctos GU573486 5                  | Genetta servalina NC024568 2         | 0,18404207 |
| Cryptoprocta ferox FC13 1                | Canis adustus KT448271 1             | 0,18404241 |
| Mustela sibirica NC020637 6              | Melursus ursinus NC009970 2          | 0,18404366 |

|                                      |                                      |            |
|--------------------------------------|--------------------------------------|------------|
| Neovison vison NC020641 3            | Lontra canadensis SRR10409165 1      | 0,13804905 |
| Nandinia binotata NC024567 1         | Genetta abyssinica MG489822 1        | 0,1380865  |
| Vulpes corsac NC023958 1             | Nyctereutes procyonoides NC013700 3  | 0,13808659 |
| Meles anakuma NC009677 1             | Lutra sumatrana NC035810 1           | 0,13809812 |
| Mungotitis decemlineata NC027828 1   | Xenogale naso C07XAR110 1            | 0,13809863 |
| Mustela sibirica AP017394 11         | Meles anakuma NC009677 1             | 0,13810435 |
| Mustela putorius NC020638 4          | Meles meles T303 3                   | 0,13810529 |
| Viverra zibetha T609 1               | Leopardus pardalis T262 1            | 0,13810714 |
| Prionailurus bengalensis NC028301 12 | Genetta servalina NC024568 2         | 0,13810901 |
| Viverricula indica NC025296 2        | Leopardus pardalis T262 1            | 0,13811094 |
| Otocyon megalotis SAF1 2             | Canis aureus KT448274 1              | 0,13814998 |
| Leopardus colocolo NC028314 1        | Civettictis civetta NC033378 1       | 0,13815473 |
| Puma yagouaroundi NC028311 1         | Nandinia binotata NC024567 1         | 0,13817321 |
| Viverricula indica KX891745 1        | Prionailurus bengalensis CKM45 20    | 0,13817899 |
| Ursus americanus JX196366 3          | Tremarctos ornatus NC009969 2        | 0,13817912 |
| Mustela nivalis T306 5               | Arctonyx jubatus NC005212 3          | 0,13817915 |
| Vulpes zerda KJ603240 1              | Canis lupus chanco NC010340 4        | 0,13818333 |
| Ursus spelaeus NC011112 8            | Tremarctos ornatus NC009969 2        | 0,13822268 |
| Melurus ursinus NC009970 2           | Arctotherium sp NC030174 1           | 0,13824809 |
| Otocyon megalotis SAF1 2             | Canis lupus chanco NC010340 4        | 0,1382491  |
| Mustela kathiah NC023210 1           | Lontra canadensis SRR10409165 1      | 0,13830461 |
| Melogale moschata NC020644 1         | Lontra canadensis SRR10409165 1      | 0,13830645 |
| Viverra zibetha T609 1               | Leopardus wiedii NC028318 1          | 0,1383094  |
| Viverricula indica NC025296 2        | Prionailurus rubiginosus NC028304 2  | 0,13831353 |
| Mustela altaica NC021751 1           | Melogale moschata V0735A 1           | 0,13831708 |
| Civettictis civetta NC033378 1       | Catopuma badia NC028300 1            | 0,13834637 |
| Viverricula indica KX891745 1        | Cynogale bennetti KY117544 1         | 0,13835551 |
| Meles leucurus NC039173 4            | Lutra lutra LC050126 1               | 0,13836733 |
| Viverra zibetha T609 1               | Leopardus pardalis NC028315 1        | 0,13837638 |
| Poecilogale albinucha T602 1         | Martes melampus NC009678 1           | 0,13837896 |
| Viverricula indica NC025296 2        | Lutrocyon serval NC028316 1          | 0,13838063 |
| Hydrurga leptonyx NC008425 1         | Eumetopias jubatus NC004030 10       | 0,1384066  |
| Meles meles T303 3                   | Ichthyonyx striatus T299 1           | 0,13844998 |
| Nyctereutes procyonoides NC013700 3  | Canis lupus chanco NC010340 4        | 0,13845478 |
| Gulo gulo NC009685 3                 | Aonyx cinerea NC035814 2             | 0,13847303 |
| Vulpes vulpes NC008434 5             | Otocyon megalotis SAF1 2             | 0,13849859 |
| Mungotitis decemlineata NC027828 1   | Ura semitorquata MH464789 1          | 0,13850221 |
| Mustela altaica NC021751 1           | Lutrogale perspicillata NC035811 1   | 0,13851926 |
| Taxidea taxus NC020646 1             | Meles meles T303 3                   | 0,13852146 |
| Vulpes ferriata NC027935 1           | Nyctereutes procyonoides NC013700 3  | 0,13855787 |
| Ursus arctos GU573491 207            | Tremarctos ornatus NC009969 2        | 0,13856503 |
| Meles meles T303 3                   | Enhydra lutris NC009692 1            | 0,13856922 |
| Viverricula indica NC025296 2        | Catopuma badia NC028300 1            | 0,13858709 |
| Taxidea taxus NC020646 1             | Lutra lutra NC011358 9               | 0,13858773 |
| Otocyon megalotis SAF1 2             | Canis lupus familiaris NC002008 1231 | 0,13859136 |
| Viverricula indica NC025296 2        | Leopardus colocolo NC028314 1        | 0,13859873 |
| Martes pennanti NC020664 16          | Lontra canadensis SRR10409165 1      | 0,13864699 |
| Mustela nigripes NC024942 1          | Lutrogale perspicillata NC035811 1   | 0,13864934 |
| Melogale moschata KP726273 1         | Ichthyonyx striatus T299 1           | 0,13864996 |
| Viverricula indica KX891745 1        | Catopuma badia NC028300 1            | 0,13865082 |
| Neovison vison NC020641 3            | Aonyx cinerea NC035814 2             | 0,13865368 |
| Viverricula indica KX891751 1        | Cynogale bennetti KY117544 1         | 0,13869165 |
| Ura semitorquata MH464789 1          | Eupleres goudotii D128 1             | 0,13870285 |
| Meles leucurus NC039173 4            | Lutra lutra NC011358 9               | 0,13870732 |
| Nandinia binotata NC024567 1         | Leopardus pardalis NC028315 1        | 0,1387136  |
| Viverricula indica KX891751 1        | Prionailurus bengalensis NC028301 12 | 0,1387136  |
| Salanoia concolor D378 1             | Galerella sanguinea T378 1           | 0,13871466 |
| Viverricula indica NC025296 2        | Prionailurus bengalensis CKM45 20    | 0,1387209  |
| Lynx pardinus NC028319 161           | Genetta abyssinica MG489822 1        | 0,13874216 |
| Vulpes zerda KJ603240 1              | Otocyon megalotis SAF1 2             | 0,13876989 |
| Taxidea taxus NC020646 1             | Mustela nigripes NC024942 1          | 0,13879202 |
| Vulpes ferriata NC027935 1           | Canis lupus chanco NC010340 4        | 0,13879335 |
| Vulpes corsac NC023958 1             | Canis lupus chanco NC010340 4        | 0,1387935  |
| Mustela erminea T305 2               | Galictis vittata T412 1              | 0,13879997 |
| Ursus spelaeus EU327344 13           | Tremarctos ornatus NC009969 2        | 0,13882367 |
| Puma concolor NC016470 22            | Civettictis civetta GLC19 1          | 0,13884956 |
| Mustela itatsi NC034330 19           | Galictis vittata T412 1              | 0,13886641 |
| Leptonychotes weddellii NC008424 1   | Callorhinus ursinus NC008415 1       | 0,13890003 |
| Galidictis fasciata DM333 1          | Attilax paludinosus T606 1           | 0,13890673 |
| Taxidea taxus NC020646 1             | Mustela putorius NC020638 4          | 0,13892661 |
| Prionailurus bengalensis NC028301 12 | Civettictis civetta NC033378 1       | 0,13895039 |
| Nandinia binotata NC024567 1         | Felis catus NC001700 2               | 0,13898143 |
| Otocolobus manul NC028323 1          | Nandinia binotata NC024567 1         | 0,13898169 |
| Nandinia binotata NC024567 1         | Leopardus wiedii NC028318 1          | 0,13898325 |
| Viverricula indica KX891745 1        | Prionailurus rubiginosus NC028304 2  | 0,13898361 |
| Melogale moschata V0735A 1           | Ichthyonyx striatus T299 1           | 0,13898632 |
| Martes pennanti NC020664 16          | Lutrogale perspicillata NC035811 1   | 0,13904867 |
| Nandinia binotata NC024567 1         | Leopardus geoffroyi NC028320 1       | 0,13905029 |
| Lynx rufus NC014456 3                | Civettictis civetta GLC19 1          | 0,13905102 |
| Mustela frenata NC020640 1           | Lutrogale perspicillata NC035811 1   | 0,1390532  |
| Taxidea taxus NC020646 1             | Mustela frenata NC020640 1           | 0,1390615  |
| Viverricula indica KX891745 1        | Leopardus colocolo NC028314 1        | 0,13906658 |
| Vulpes vulpes NC008434 5             | Canis arthus NC027956 2              | 0,13909648 |
| Otocyon megalotis SAF1 2             | Nyctereutes procyonoides NC013700 3  | 0,1391038  |
| Vulpes ferriata NC027935 1           | Otocyon megalotis SAF1 2             | 0,13910519 |
| Poecilogale albinucha T602 1         | Meles meles T303 3                   | 0,13911711 |
| Prionailurus bengalensis NC028301 12 | Civettictis civetta GLC19 1          | 0,13911901 |
| Mustela altaica NC021751 1           | Meles meles T303 3                   | 0,13912131 |
| Meles leucurus NC039173 4            | Ichthyonyx striatus T299 1           | 0,13912311 |
| Civettictis civetta GLC19 1          | Acinonyx jubatus NC005212 3          | 0,13913117 |
| Taxidea taxus NC020646 1             | Melogale moschata NC020644 1         | 0,13913245 |
| Zalophus californianus NC008416 1    | Hydrurga leptonyx NC008425 1         | 0,13913828 |
| Meles anakuma NC009677 1             | Gulo gulo NC009685 3                 | 0,13914113 |
| Meles leucurus NC039173 4            | Enhydra lutris NC009692 1            | 0,13914791 |
| Mungos mungo/gambianus SRR7704821 1  | Galidictis fasciata DM333 1          | 0,13917677 |
| Mustela nivalis T306 5               | Meles meles T303 3                   | 0,13918862 |
| Taxidea taxus NC020646 1             | Mustela sibirica NC020637 6          | 0,13919741 |
| Leptonychotes weddellii NC008424 1   | Eumetopias jubatus NC004030 10       | 0,13920502 |
| Hydrurga leptonyx NC008425 1         | Callorhinus ursinus NC008415 1       | 0,13924709 |
| Prionailurus planiceps KY682741 4    | Nandinia binotata NC024567 1         | 0,13925055 |
| Melogale moschata V0735A 1           | Meles meles T303 3                   | 0,13930951 |
| Prionailurus planiceps NC028312 6    | Nandinia binotata NC024567 1         | 0,1393179  |
| Prionailurus viverrinus NC028305 1   | Nandinia binotata NC024567 1         | 0,13932091 |

|                                      |                                    |            |
|--------------------------------------|------------------------------------|------------|
| Mustela sibirica AP017394 11         | Helarctos malayanus NC009968 2     | 0,18404375 |
| Mustela kathiah NC023210 1           | Melurus ursinus NC009970 2         | 0,18404472 |
| Lutra lutra NC011358 9               | Genetta abyssinica MG489822 1      | 0,18404493 |
| Mustela nigripes NC024942 1          | Melurus ursinus NC009970 2         | 0,18404518 |
| Meles meles T303 3                   | Canis mesomelas KT448280 1         | 0,18404958 |
| Ursus thibetanus laniger MH281753 2  | Poecilogale albinucha T602 1       | 0,18405248 |
| Arctotherium sp NC030174 1           | Acinonyx jubatus NC005212 3        | 0,18405281 |
| Ursus thibetanus thibetanus NC011111 | Felis silvestris lybica KP202275 4 | 0,18405309 |
| Profelis aurata NC028299 1           | Chrysocyon brachyurus NC024172 1   | 0,18405339 |
| Ursus thibetanus thibetanus NC011111 | Leopardus tigrinus NC028317 1      | 0,18405411 |
| Ursus thibetanus formosanus NC00933  | Catopuma badia NC028300 1          | 0,18405516 |
| Helarctos malayanus NC009968 2       | Caracal caracal NC028306 1         | 0,18405554 |
| Smilodon populator MF871700 1        | Eumetopias jubatus NC004030 10     | 0,18405771 |
| Leopardus geoffroyi NC028320 1       | Canis lupus chanco NC010340 4      | 0,18406075 |
| Lycalopex secureae KT448284 1        | Felis margarita NC028308 1         | 0,18406557 |
| Lutra lutra NC011358 9               | Felis catus NC001700 2             | 0,18406782 |
| Ursus americanus JX196366 3          | Genetta servalina NC024568 2       | 0,18406843 |
| Mungos mungo MCM7 1                  | Meles anakuma NC009677 1           | 0,18407708 |
| Lutra sumatrana NC035810 1           | Ura semitorquata MH464789 1        | 0,18407811 |
| Mungos mungo/gambianus SRR77048      | Meles meles T303 3                 | 0,18407902 |
| Phocarcotus hookeri NC008418 1       | Crossarchus platycephalus C7R66 1  | 0,18408145 |
| Meles leucurus NC039173 4            | Cynogale bennetti KY117544 1       | 0,18408345 |
| Lutra lutra NC011358 9               | Civettictis civetta GLC19 1        | 0,18408389 |
| Puma yagouaroundi NC028311 1         | Tapirus terrestris T358            | 0,18408391 |
| Lutra lutra NC011358 9               | Galerella sanguinea T378 1         | 0,18408583 |
| Galerella sanguinea T378 1           | Enhydra lutris NC009692 1          | 0,18408762 |
| Mustela itatsi NC034330 19           | Canis anthus NC027956 2            | 0,18408903 |
| Neovison vison NC020641 3            | Eupleres goudotii D128 1           | 0,18409033 |
| Viverricula indica KX891745 1        | Melogale moschata V0735A 1         | 0,18409036 |
| Prionailurus planiceps NC028312 6    | Arctonyx collaris NC020645 1       | 0,18409064 |
| Viverra zibetha T609 1               | Melogale moschata V0735A 1         | 0,18409075 |
| Panthera uncia KP202269 1            | Enhydra lutris NC009692 1          | 0,18409199 |
| Lutra lutra NC011358 9               | Cryptothroca ferox CF13 1          | 0,18409206 |
| Acinonyx jubatus NC005212 3          | Tapirus terrestris T358            | 0,18409236 |
| Ursus thibetanus mupinensis NC00875  | Lutra lutra LC050126 1             | 0,1840928  |
| Panthera uncia NC010638 1            | Mustela frenata NC020640 1         | 0,18409322 |
| Ura semitorquata MH464789 1          | Canis aureus KT448274 1            | 0,18409325 |
| Ursus spelaeus EU327344 13           | Civettictis civetta NC033378 1     | 0,18409339 |
| Ursus spelaeus NC011112 8            | Civettictis civetta NC033378 1     | 0,18409362 |
| Ursus splanax EU327344 13            | Smilodon populator MF871700 1      | 0,18409364 |
| Ura javanica T413 1                  | Arctodus simus NC011116 1          | 0,18409394 |
| Viverricula indica NC025296 2        | Melogale moschata KP726273 1       | 0,18409401 |
| Ursus maritimus GU573488 Svalbard    | Genetta abyssinica MG489822 1      | 0,18409446 |
| Prionodon linsang ERR2391707 1       | Phoca vitulina NC001325 1          | 0,18409482 |
| Ursus maritimus GU573488 Svalbard    | Enhydra lutris NC009692 1          | 0,18409494 |
| Mustela evermanni NC028013 1         | Caracal caracal NC028306 1         | 0,18409537 |
| Panthera uncia KP202269 1            | Mustela erminea T305 2             | 0,18409599 |
| Vulpes vulpes NC008434 5             | Prionailurus viverrinus NC028305 1 | 0,18409625 |
| Vulpes vulpes NC008434 5             | Profelis aurata NC028299 1         | 0,18409649 |
| Mustela nigripes NC024942 1          | Genetta genetta T297 1             | 0,18409671 |
| Tremarctos ornatus NC009969 2        | Caracal caracal NC028306 1         | 0,18409762 |
| Lynx canadensis NC028313 1           | Canis latrans NC008093 7           | 0,1840979  |
| Mustela evermanni NC028013 1         | Lycaon pictus NC028427 2           | 0,18409854 |
| Procyon lotor AB462049 4             | Civettictis civetta GLC19 1        | 0,18409862 |
| Ursus arctos EU497665 29             | Genetta abyssinica MG489822 1      | 0,18409908 |
| Prionailurus bengalensis CKM45 20    | Arctocepalus australis MG023139 1  | 0,18409963 |
| Caracal caracal NC028306 1           | Arctocepalus pusillus NC008417 1   | 0,18410306 |
| Melogale moschata KP726273 1         | Homotherium latidens MF871702 3    | 0,18410321 |
| Leopardus pardalis NC028315 1        | Arctotherium sp NC030174 1         | 0,18410337 |
| Panthera onca KP202264 2             | Melogale moschata NC020644 1       | 0,18410382 |
| Ursus arctos AP012576 6              | Genetta abyssinica MG489822 1      | 0,18410455 |
| Otaria byronia OTAB 1                | Leopardus wiedii NC028318 1        | 0,18410546 |
| Ursus arctos EU497665 29             | Mustela nivalis T306 5             | 0,18410616 |
| Ursus thibetanus mupinensis NC00875  | Lynx lynx NC027083 4               | 0,18410668 |
| Procyon lotor AB462046 3             | Leopardus geoffroyi NC028320 1     | 0,18410669 |
| Prionailurus viverrinus NC028305 1   | Canis aureus KT448274 1            | 0,18410738 |
| Mephitis mephitis NC020648 1         | Melogale moschata NC020644 1       | 0,18410814 |
| Ursus thibetanus laniger MH281753 2  | Galidictis fasciata DM333 1        | 0,18410841 |
| Ursus thibetanus mupinensis NC00875  | Leopardus tigrinus NC028317 1      | 0,18410935 |
| Zalophus wollebaeki SRR4431565 1     | Paradoxurus jerdoni MH464793 1     | 0,18410985 |
| Helarctos malayanus NC009968 2       | Chrotogale owstoni T607 1          | 0,18411289 |
| Canis anthus NC027956 2              | Acinonyx jubatus NC005212 3        | 0,18411414 |
| Gulo gulo NC009685 3                 | Chrotogale owstoni T607 1          | 0,1841161  |
| Leopardus colocolo NC028314 1        | Canis anthus NC027956 2            | 0,18411645 |
| Ursus thibetanus thibetanus NC011111 | Lynx rufus NC014456 3              | 0,18411988 |
| Ursus thibetanus thibetanus NC011111 | Puma concolor NC016470 22          | 0,18412179 |
| Ursus thibetanus laniger MH281753 2  | Lycaon pictus NC028427 2           | 0,18412428 |
| Ursus thibetanus thibetanus NC011111 | Prionailurus bengalensis CKM45 20  | 0,18412529 |
| Prionailurus bengalensis NC028301 12 | Canis mesomelas KT448280 1         | 0,18412608 |
| Lynx pardinus NC028319 161           | Arctocepalus forsteri NC004023 28  | 0,18412659 |
| Zalophus californianus NC008416 1    | Leopardus jacobita NC028322 1      | 0,18412973 |
| Leopardus geoffroyi NC028320 1       | Arctocepalus forsteri NC004023 28  | 0,18413179 |
| Ommatophoca rossii AY377287etc 1     | Lycaon pictus NC028427 2           | 0,18413502 |
| Ommatophoca rossii AY377287etc 1     | Hyaena hyaena NC020669 1           | 0,18413597 |
| Felis chaus NC028307 1               | Canis lupus chanco NC010340 4      | 0,184136   |
| Ursus thibetanus laniger MH281753 2  | Acinonyx jubatus NC005212 3        | 0,1841369  |
| Genetta abyssinica MG489822 1        | Aonyx cinerea NC035814 2           | 0,184137   |
| Ursus thibetanus thibetanus NC011111 | Acinonyx jubatus NC005212 3        | 0,18413751 |
| Ursus americanus JX196366 3          | Chrotogale owstoni T607 1          | 0,18413781 |
| Mungos mungo/gambianus SRR77048      | Lutra lutra NC011358 9             | 0,18414137 |
| Lutra lutra LC050126 1               | Ura semitorquata MH464789 1        | 0,18414342 |
| Mustela sibirica NC020637 6          | Arctocepalus australis MG023139 1  | 0,18414705 |
| Ursus arctos isabellinus 1885 3      | Gulo gulo NC009685 3               | 0,18414718 |
| Mustela itatsi NC034330 19           | Arctocepalus australis MG023139 1  | 0,18414746 |
| Mustela kathiah NC023210 1           | Attilax paludinosus T606 1         | 0,18414947 |
| Viverra tangalunga MH464792 1        | Smilodon populator MF871700 1      | 0,18415229 |
| Vulpes lagopus NC026529 3            | Mungotitis decemlineata NC027828 1 | 0,1841538  |
| Martes martes T302 3                 | Bdeogale nigripes GLC15 1          | 0,18415396 |
| Tremarctos ornatus NC009969 2        | Mustela putorius NC020638 4        | 0,18415417 |
| Vulpes ferriata NC027935 1           | Salanoia concolor D378 1           | 0,18415469 |
| Salanoia concolor D378 1             | Canis latrans NC008093 7           | 0,18415543 |
| Lutra lutra LC050126 1               | Felis chaus NC028307 1             | 0,18415664 |
| Crossarchus platycephalus C7R66 1    | Arctotherium sp NC030174 1         | 0,18415761 |

|                                      |                                    |            |
|--------------------------------------|------------------------------------|------------|
| Leptailurus serval NC028316 1        | Genetta servalina NC024568 2       | 0,13932119 |
| Otocolobus manu NC028323 1           | Civettictis civetta GLC19 1        | 0,13932155 |
| Mustela sibirica NC020637 6          | Lutrogale perspicillata NC035811 1 | 0,13932224 |
| Prionailurus bengalensis CKM45 20    | Genetta servalina NC024568 2       | 0,13932443 |
| Taxidea taxus NC020646 1             | Mustela sibirica AP017394 11       | 0,13933185 |
| Mustela nigripes NC024942 1          | Galictis vittata T412 1            | 0,13933748 |
| Leptailurus serval NC028316 1        | Genetta abyssinica MG489822 1      | 0,13934301 |
| Civettictis civetta NC033378 1       | Acinonyx jubatus NC005212 3        | 0,13936523 |
| Viverricula indica NC025296 2        | Cynogale bennetti KY117544 1       | 0,13936636 |
| Homotherium latidens MF871702 3      | Genetta servalina NC024568 2       | 0,13938498 |
| Viverra zibetha T609 1               | Prionailurus planiceps NC028312 6  | 0,13938744 |
| Viverra zibetha T609 1               | Prionailurus planiceps KY682741 4  | 0,13938755 |
| Mustela frenata NC020640 1           | Mustela sibirica T412 1            | 0,13940494 |
| Taxidea taxus NC020646 1             | Ictonyx striatus T299 1            | 0,13941048 |
| Vulpes corsac NC023958 1             | Otocyon megalotis SAF1 2           | 0,13944145 |
| Ursus arctos AP012576 6              | Tremarctos ornatus NC009969 2      | 0,13944745 |
| Viverra tangalunga MH464792 1        | Arctonyx collaris NC020645 1       | 0,13945049 |
| Viverricula indica XK891745 1        | Leptailurus serval NC028316 1      | 0,13945496 |
| Viverricula indica XK891745 1        | Puma yagouaroundi NC028311 1       | 0,13945498 |
| Leopardus pardalis T262 1            | Civettictis civetta GLC19 1        | 0,13945517 |
| Leptailurus serval NC028316 1        | Civettictis civetta GLC19 1        | 0,13945593 |
| Viverra zibetha T609 1               | Leopardus colocolo NC028314 1      | 0,13947031 |
| Vulpes zerda KJ603240 1              | Canis anthus NC027956 2            | 0,13950044 |
| Leopardus colocolo NC028314 1        | Hemigalus derbyanus MH464791 1     | 0,13950756 |
| Viverra tangalunga MH464792 1        | Lontra canadensis SRR10409165 1    | 0,13951649 |
| Mustela putorius NC020638 4          | Meles anakuma NC009677 1           | 0,13951774 |
| Viverra tangalunga MH464792 1        | Melogale moschata V0735A 1         | 0,1395238  |
| Viverricula indica NC025296 2        | Profelis aurata NC028299 1         | 0,13952531 |
| Viverricula indica XK891745 1        | Acinonyx jubatus NC005212 3        | 0,13953419 |
| Prionailurus rubiginosus NC028304 2  | Civettictis civetta NC033378 1     | 0,1395568  |
| Vulpes corsac NC023958 1             | Canis anthus NC027956 2            | 0,13956776 |
| Taxidea taxus NC020646 1             | Meles leucurus NC039173 4          | 0,13959832 |
| Meles anakuma NC009677 1             | Enhydra lutris NC009692 1          | 0,13964601 |
| Meles anakuma NC009677 1             | Lutra lutra LC050126 1             | 0,13964601 |
| Mustela nigripes NC024942 1          | Meles anakuma NC009677 1           | 0,13965227 |
| Viverra zibetha T609 1               | Otocolobus manu NC028323 1         | 0,1396756  |
| Mustela altaica NC021751 1           | Arctonyx collaris NC020645 1       | 0,13969566 |
| Viverricula indica NC025296 2        | Otocolobus manu NC028323 1         | 0,13966055 |
| Leopardus wiedii NC028318 1          | Hemigalus derbyanus MH464791 1     | 0,13966361 |
| Viverricula indica NC025296 2        | Acinonyx jubatus NC005212 3        | 0,13967206 |
| Genetta abyssinica MG489822 1        | Catopuma badia NC028300 1          | 0,13967754 |
| Leopardus pardalis T262 1            | Civettictis civetta NC033378 1     | 0,13968723 |
| Puma concolor NC016470 22            | Genetta abyssinica MG489822 1      | 0,13968895 |
| Ursus arctos T413 1                  | Fossa fossana D350 1               | 0,13971183 |
| Ursus arctos GU573486 5              | Tremarctos ornatus NC009969 2      | 0,13971609 |
| Nandinia binotata NC024567 1         | Lynx canadensis NC028313 1         | 0,13972144 |
| Mustela eversmannii NC028013 1       | Lutrogale perspicillata NC035811 1 | 0,13972594 |
| Prionailurus bengalensis NC028301 12 | Genetta genetta T297 1             | 0,13972606 |
| Prionailurus bengalensis CKM45 20    | Civettictis civetta GLC19 1        | 0,13972843 |
| Poecilogale albinucha T602 1         | Martes foina NC020643 1            | 0,13973249 |
| Ursus maritimus GU573488 Svalbard    | Tremarctos ornatus NC009969 2      | 0,13977756 |
| Mustela eversmannii NC028013 1       | Meles meles T303 3                 | 0,13978781 |
| Viverricula indica XK891745 1        | Prionailurus viverrinus NC028305 1 | 0,13979137 |
| Viverra zibetha T609 1               | Profelis aurata NC028299 1         | 0,13979222 |
| Prionailurus rubiginosus NC028304 2  | Civettictis civetta GLC19 1        | 0,13979258 |
| Mustela sibirica AP017394 11         | Lutrogale perspicillata NC035811 1 | 0,13979317 |
| Lutra lutra LC050126 1               | Galictis vittata T412 1            | 0,13979743 |
| Taxidea taxus NC020646 1             | Arctonyx collaris NC020645 1       | 0,13979749 |
| Poecilogale albinucha T602 1         | Melogale moschata NC020644 1       | 0,13979934 |
| Viverra tangalunga MH464792 1        | Taxidea taxus NC020646 1           | 0,13980152 |
| Viverra zibetha T609 1               | Acinonyx jubatus NC005212 3        | 0,13980375 |
| Otocyon megalotis SAF1 2             | Canis anthus NC027956 2            | 0,13984437 |
| Otocyon megalotis SAF1 2             | Canis mesomelas KT448280 1         | 0,13984571 |
| Nandinia binotata NC024567 1         | Leopardus jacobita NC028322 1      | 0,13985869 |
| Leopardus wiedii NC028318 1          | Genetta servalina NC024568 2       | 0,13985872 |
| Prionailurus rubiginosus NC028304 2  | Genetta servalina NC024568 2       | 0,13985987 |
| Nandinia binotata NC024567 1         | Acinonyx jubatus NC005212 3        | 0,13987075 |
| Puma concolor NC016470 22            | Civettictis civetta NC033378 1     | 0,1398941  |
| Ursus arctos EU497665 29             | Tremarctos ornatus NC009969 2      | 0,13991249 |
| Ursus arctos prinosus MG066703 3     | Tremarctos ornatus NC009969 2      | 0,13991882 |
| Prionailurus bengalensis NC028301 12 | Hemigalus derbyanus MH464791 1     | 0,13991892 |
| Nandinia binotata NC024567 1         | Catopuma temminckii NC027115 41    | 0,13992265 |
| Mungotictis decemlineata NC027828 1  | Galerella sanguinea T378 1         | 0,13992617 |
| Mustela putorius NC020638 4          | Lutrogale perspicillata NC035811 1 | 0,13992797 |
| Viverricula indica NC025296 2        | Leopardus pardalis NC028315 1      | 0,13992892 |
| Leptailurus serval NC028316 1        | Hemigalus derbyanus MH464791 1     | 0,13995668 |
| Vulpes ferrilata NC027935 1          | Canis anthus NC027956 2            | 0,13997172 |
| Melogale moschata V0735A 1           | Lontra canadensis SRR10409165 1    | 0,13998251 |
| Nandinia binotata NC024567 1         | Lynx pardinus NC028319 161         | 0,13999099 |
| Viverricula indica XK891745 1        | Otocolobus manu NC028323 1         | 0,13999403 |
| Poecilogale albinucha T602 1         | Martes zibellina NCD11579 39       | 0,13999431 |
| Ursus arctos prinosus MG066703 3     | Fossa fossana D350 1               | 0,14001818 |
| Vulpes lagopus NC026529 3            | Canis anthus NC027956 2            | 0,14003906 |
| Nandinia binotata NC024567 1         | Genetta servalina NC024568 2       | 0,14005573 |
| Viverricula indica XK891751 1        | Otocolobus manu NC028323 1         | 0,14006092 |
| Viverricula indica NC025296 2        | Puma yagouaroundi NC028311 1       | 0,14006442 |
| Zalophus wolfebaeki SRR4431565 1     | Hydrurga leptonyx NC008425 1       | 0,14006908 |
| Taxidea taxus NC020646 1             | Melogale moschata KP726273 1       | 0,14007445 |
| Prionailurus bengalensis CKM45 20    | Civettictis civetta NC033378 1     | 0,14009885 |
| Galidictis fasciata DM333 1          | Cynictis penicillata T375 1        | 0,14012004 |
| Viverricula indica XK891745 1        | Nandinia binotata NC024567 1       | 0,14012234 |
| Puma concolor NC016470 22            | Nandinia binotata NC024567 1       | 0,14012583 |
| Galidictis fasciata DM333 1          | Galerella sanguinea T378 1         | 0,14012697 |
| Viverricula indica NC025296 2        | Nandinia binotata NC024567 1       | 0,14012726 |
| Poecilogale albinucha T602 1         | Melogale moschata KP726273 1       | 0,14012836 |
| Viverricula indica NC025296 2        | Leopardus wiedii NC028318 1        | 0,14013118 |
| Lutra sumatrana NC035810 1           | Galictis vittata T412 1            | 0,14013416 |
| Vulpes lagopus NC026529 3            | Canis lupus chanco NCD10340 4      | 0,14014085 |
| Otocolobus manu NC028323 1           | Civettictis civetta NC033378 1     | 0,14016007 |
| Prionailurus bengalensis NC028301 12 | Genetta abyssinica MG489822 1      | 0,14016214 |
| Viverra tangalunga MH464792 1        | Meles meles T303 3                 | 0,14019212 |
| Taxidea taxus NC020646 1             | Mustela itarsi NC034330 19         | 0,14020552 |
| Felis chaus NC028307 1               | Civettictis civetta NC033378 1     | 0,14022918 |

|                                     |                                      |            |
|-------------------------------------|--------------------------------------|------------|
| Lutra lutra NC011358 9              | Leopardus guigna NC028321 1          | 0,18415843 |
| Ursus arctos GU573491 207           | Genetta abyssinica MG489822 1        | 0,18415913 |
| Caracal caracal NC028306 1          | Ailurus fulgens styani NC000961 1    | 0,18416077 |
| Potos flavus T414 1                 | Canis adustus KT448271 1             | 0,1841612  |
| Ursus maritimus NC003428 31         | Arctocepalus forsteri KT693377 17    | 0,18416125 |
| Ursus arctos EU497665 29            | Martes zibellina NCD11579 39         | 0,18416131 |
| Lutra sumatrana NC035810 1          | Caracal caracal NC028306 1           | 0,18416201 |
| Ursus maritimus NC003428 31         | Enhydra lutris NC009692 1            | 0,18416226 |
| Mustela sibirica AP017394 11        | Genetta genetta T297 1               | 0,18416356 |
| Vulpes lagopus NC026529 3           | Leopardus pardalis NC028315 1        | 0,18416364 |
| Vulpes lagopus NC026529 3           | Leptailurus serval NC028316 1        | 0,18416429 |
| Leopardus pardalis NC028315 1       | Arctocepalus forsteri KT693377 17    | 0,18416436 |
| Prionailurus viverrinus NC028305 1  | Melogale moschata V0735A 1           | 0,18416476 |
| Nyctereutes procyonoides NC013700 3 | Lynx lynx NC027083 4                 | 0,18416518 |
| Neophoca cinerea NC008419 1         | Leopardus pardalis NC028315 1        | 0,18416721 |
| Vulpes corsac NC023958 1            | Catopuma badia NC028300 1            | 0,18416741 |
| Paradoxurus jerdoni MH464793 1      | Lycalopex secureae KT448284 1        | 0,18416744 |
| Ursus arctos GU573486 5             | Arctocepalus australis MG023139 1    | 0,18416792 |
| Otaria byronia OTAB 1               | Lynx canadensis NC028313 1           | 0,18416874 |
| Catopuma badia NC028300 1           | Aonyx cinerea NC035814 2             | 0,18416962 |
| Ursus maritimus GU573488 Svalbard   | Civettictis civetta GLC19 1          | 0,18417026 |
| Chrotogale owstoni T607 1           | Ailuropoda melanoleuca NC009492 5    | 0,18417141 |
| Speothos venaticus C48 2            | Phoca fasciata NC008428 1            | 0,18417148 |
| Viverricula indica XK891745 1       | Speothos venaticus C48 2             | 0,18417355 |
| Felis chaus NC028307 1              | Arctodus simus NCD11116 1            | 0,18417367 |
| Speothos venaticus C48 2            | Phoca largha NC008430 1              | 0,18417408 |
| Ursus spelaeus EU327344 13          | Melogale moschata V0735A 1           | 0,18417469 |
| Ursus thibetanus mupinensis NC00875 | Genetta genetta T297 1               | 0,18417469 |
| Viverra zibetha T609 1              | Ursus arctos GU573486 5              | 0,184176   |
| Ursus arctos GU573486 5             | Civettictis civetta GLC19 1          | 0,18417655 |
| Ursus thibetanus mupinensis NC00875 | Paguma larvata PDD511 2              | 0,18417674 |
| Ursus thibetanus mupinensis NC00875 | Prionailurus rubiginosus NC028304 2  | 0,18417804 |
| Ursus arctos AP012576 6             | Arctocepalus gazella BK010918 1      | 0,18417846 |
| Ursus spelaeus NC028307 1           | Arctocepalus forsteri KT693377 17    | 0,18417868 |
| Ursus arctos AP012576 6             | Mustela frenata NC020640 1           | 0,18417892 |
| Vulpes corsac NC023958 1            | Acinonyx jubatus NC005212 3          | 0,18417922 |
| Zalophus wolfebaeki SRR4431565 1    | Lynx rufus NCD14456 3                | 0,18417932 |
| Vulpes ferrilata NC027935 1         | Acinonyx jubatus NC005212 3          | 0,18417965 |
| Phoca groenlandica NC008429 54      | Crocota crocata NC020670 3           | 0,18417975 |
| Taxidea taxus NC020646 1            | Canis mesomelas KT448280 1           | 0,18417986 |
| Canis adustus KT448271 1            | Arctocepalus forsteri NCD04023 28    | 0,18418212 |
| Ursus americanus JX196366 3         | Gulo gulo NC009685 3                 | 0,18418235 |
| Viverra tangalunga MH464792 1       | Ursus spelaeus EU327344 13           | 0,18418238 |
| Ursus arctos AP012576 6             | Arctonyx collaris NC020645 1         | 0,18418242 |
| Zalophus californianus NC008416 1   | Eupleres goudotii D128 1             | 0,18418311 |
| Leptailurus serval NC028316 1       | Ailuropoda melanoleuca NC009492 5    | 0,18418333 |
| Melogale moschata V0735A 1          | Genetta abyssinica MG489822 1        | 0,18418387 |
| Martes flavigula NCD12141 3         | Conepatus chinga NC042596 1          | 0,18418416 |
| Zalophus californianus NC008416 1   | Conepatus chinga NC042596 1          | 0,18418449 |
| Spilogale putorius NC010497 1       | Callorhinus ursinus NC008415 1       | 0,18418576 |
| Ursus thibetanus laniger MH281753 2 | Lynx rufus NCD14456 3                | 0,18418585 |
| Monachus schauinslandi NC008421 1   | Crocota crocata NC020670 3           | 0,18418677 |
| Mustela kathiah NC023210 1          | Ursus arctos GU573486 5              | 0,18419212 |
| Arctocepalus forsteri NC004023 28   | Aonyx cinerea NC035814 2             | 0,18419388 |
| Otaria byronia OTAB 1               | Canis adustus KT448271 1             | 0,18419626 |
| Ommatophoca rossii AY377287etc1     | Lycalopex secureae KT448284 1        | 0,18419635 |
| Leopardus guigna NC028321 1         | Canis lupus familiaris NC002008 1231 | 0,18420166 |
| Pardofelis marmorata NLN3 2         | Gulo gulo NC009685 3                 | 0,18420386 |
| Ursus spelaeus EU327344 13          | Arctocepalus forsteri NCD04023 28    | 0,18420438 |
| Ursus thibetanus laniger MH281753 2 | Leopardus colocolo NC028314 1        | 0,18420564 |
| Prionailurus planiceps KY682741 4   | Eumetopias jubatus NC004030 10       | 0,18420869 |
| Puma concolor NC016470 22           | Eumetopias jubatus NC004030 10       | 0,18420929 |
| Mungos mungo/gambianus SRR77048     | Lutra lutra LC050126 1               | 0,18420936 |
| Meles leucurus NC039173 4           | Eupleres goudotii D128 1             | 0,18421182 |
| Felis margarita NC028308 1          | Canis mesomelas KT448280 1           | 0,18421191 |
| Ursus maritimus NC003428 31         | Gulo gulo NC009685 3                 | 0,1842147  |
| Meles meles T303 3                  | Cynictis penicillata T375 1          | 0,18421502 |
| Mustela eversmannii NC028013 1      | Arctocepalus gazella BK010918 1      | 0,18421566 |
| Neophoca cinerea NC008419 1         | Chrotogale owstoni T607 1            | 0,1842158  |
| Ursus arctos prinosus MG066703 3    | Canis lupus chanco NCD10340 4        | 0,18421602 |
| Lutra lutra NC011358 9              | Galidictis fasciata DM333 1          | 0,18421644 |
| Lutra lutra LC050126 1              | Galidia elegans D146 1               | 0,18421736 |
| Canis anthus NC027956 2             | Attilax paludinosus T606 1           | 0,18421851 |
| Otocolobus manu NC028323 1          | Lutra lutra NC011358 9               | 0,18422352 |
| Profelis aurata NC028299 1          | Arctonyx collaris NC020645 1         | 0,1842268  |
| Mustela nivalis T306 5              | Attilax paludinosus T606 1           | 0,18422703 |
| Pardofelis marmorata NLN3 2         | Callorhinus ursinus NC008415 1       | 0,18422741 |
| Smilodon populator MF871700 1       | Callorhinus ursinus NC008415 1       | 0,18422782 |
| Melogale moschata NC020644 1        | Homotherium latidens MF871702 3      | 0,18422796 |
| Tremarctos ornatus NC009969 2       | Otaria byronia OTAB 1                | 0,18422821 |
| Ursus arctos GU573491 207           | Arctocepalus forsteri KT693377 17    | 0,18422846 |
| Phoca groenlandica NC008429 54      | Nasua nasua NCD20647 1               | 0,18422873 |
| Paguma larvata PDD511 2             | Canis anthus NC027956 2              | 0,18423107 |
| Panthera pardus japonensis KJ866876 | Mustela erminea T305 2               | 0,18423121 |
| Melogale moschata KP726273 1        | Caracal caracal NC028306 1           | 0,1842313  |
| Potos flavus T414 1                 | Ichneumia albicauda T603 1           | 0,18423183 |
| Ursus maritimus NC003428 31         | Phocarcus hookeri NC008418 1         | 0,18423235 |
| Leopardus geoffroyi NC028320 1      | Arctocepalus australis MG023139 1    | 0,18423316 |
| Ursus maritimus NC003428 31         | Neophoca cinerea NC008419 1          | 0,18423337 |
| Vulpes corsac NC023958 1            | Mirounga angustirostris SRR10331586  | 0,1842337  |
| Potos flavus T414 1                 | Ailuropoda melanoleuca NC009492 5    | 0,18423538 |
| Ursus arctos EU497665 29            | Martes martes T302 3                 | 0,18423602 |
| Felis margarita NC028308 1          | Arctocepalus pusillus NC008417 1     | 0,18423672 |
| Ursus arctos EU497665 29            | Civettictis civetta GLC19 1          | 0,1842377  |
| Profelis aurata NC028299 1          | Procyon lotor AB462049 4             | 0,1842379  |
| Paradoxurus hermaphroditus NC03959  | Arctodus simus NCD11116 1            | 0,1842387  |
| Melogale moschata V0735A 1          | Helarctos malayanus NC009968 2       | 0,18424009 |
| Melogale moschata V0735A 1          | Canis adustus KT448271 1             | 0,18424013 |
| Panthera onca NC022842 1            | Mustela putorius NC020638 4          | 0,18424074 |
| Felis margarita NC028308 1          | Bassariscus sumichrasti SRX1099089 1 | 0,18424107 |
| Ursus maritimus GU573488 Svalbard   | Poecilogale albinucha T602 1         | 0,18424131 |
| Helarctos malayanus NC009968 2      | Crossarchus platycephalus C7R66 1    | 0,18424244 |
| Chrotogale owstoni T607 1           | Canis lupus chanco NCD10340 4        | 0,18424296 |

|                                     |                                     |            |
|-------------------------------------|-------------------------------------|------------|
| Eupleres goudotii D128 1            | Crossarchus platycephalus C7R66 1   | 0,14025235 |
| Nandinia binotata NC024567 1        | Civettictis civetta GLC19 1         | 0,14025782 |
| Mustela eversmanni NC028013 1       | Meles anakuma NC009677 1            | 0,14025818 |
| Nandinia binotata NC024567 1        | Leptailurus serval NC028316 1       | 0,14020686 |
| Felis margarita NC028308 1          | Civettictis civetta GLC19 1         | 0,14026375 |
| Meles anakuma NC009677 1            | Ictonyx striatus T299 1             | 0,14026727 |
| Mustela sibirica NC020637 6         | Galictis vittata T412 1             | 0,14027967 |
| Smilodon populator MF871700 1       | Civettictis civetta GLC19 1         | 0,14032175 |
| Viverra zibetha T609 1              | Caracal caracal NC028306 1          | 0,14033066 |
| Prionailurus planiceps KY682741 4   | Civettictis civetta GLC19 1         | 0,14033087 |
| Prionailurus viverrinus NC028305 1  | Genetta servalina NC024568 2        | 0,14033094 |
| Felis silvestris lybica KP202275 4  | Civettictis civetta GLC19 1         | 0,14033099 |
| Galictis vittata T412 1             | Enhydra lutris NC009692 1           | 0,14033593 |
| Mustela itatsi NC034330 19          | Lutrogale perspicillata NC035811 1  | 0,14039923 |
| Prionailurus planiceps KY682741 4   | Civettictis civetta NC033378 1      | 0,14043316 |
| Lynx rufus NC014456 3               | Civettictis civetta NC033378 1      | 0,14043441 |
| Otocyon megalotis SAF1 2            | Lycalopex schuerae KT448284 1       | 0,14043655 |
| Vulpes vulpes NC008434 5            | Canis mesomelas KT448280 1          | 0,14044291 |
| Galidia elegans D146 1              | Crossarchus platycephalus C7R66 1   | 0,14045416 |
| Mustela altaica NC021751 1          | Meles leucurus NC039173 4           | 0,14046748 |
| Galictis vittata T412 1             | Aonyx cinerea NC035814 2            | 0,14047004 |
| Vulpes corsac NC023958 1            | Canis mesomelas KT448280 1          | 0,14050972 |
| Leopardus pardalis NC028315 1       | Genetta abyssinica MG489822 1       | 0,14051503 |
| Meles anakuma NC009677 1            | Lutra lutra NC011358 9              | 0,1405209  |
| Salanoia concolor D378 1            | Cynictis penicillata T375 1         | 0,14052373 |
| Viverricula indica XK891745 1       | Leopardus pardalis NC028315 1       | 0,14053087 |
| Viverricula indica XK891751 1       | Prionailurus rubiginosus NC028304 2 | 0,14053181 |
| Viverricula indica NC025296 2       | Leopardus jacobita NC028322 1       | 0,14053543 |
| Nyctereutes procyonoides NC013700 3 | Canis anthus NC027956 2             | 0,14057766 |
| Salanoia concolor D378 1            | Attilax paludinosus T606 1          | 0,14058983 |
| Mungotictis decemlineata NC027828 1 | Bdeogale nigripes GLC15 1           | 0,14059038 |
| Viverricula indica XK891745 1       | Leopardus pardalis T262 1           | 0,14059833 |
| Mustela putorius NC020638 4         | Galictis vittata T412 1             | 0,14061619 |
| Smilodon populator MF871700 1       | Civettictis civetta NC033378 1      | 0,14064857 |
| Ursus maritimus NC003428 31         | Tremarctos ornatus NC009969 2       | 0,14065324 |
| Leptonychotes weddellii NC008424 1  | Arctocepalus pusillus NC008417 1    | 0,14065702 |
| Nandinia binotata NC024567 1        | Lynx rufus NC014456 3               | 0,14066437 |
| Nandinia binotata NC024567 1        | Leopardus guigna NC028321 1         | 0,14066631 |
| Viverra zibetha T609 1              | Leptailurus serval NC028316 1       | 0,14066721 |
| Prionailurus planiceps NC028312 6   | Civettictis civetta GLC19 1         | 0,1406675  |
| Nyctereutes procyonoides NC013700 3 | Lycalopex schuerae KT448284 1       | 0,14068627 |
| Cynogale bennetti KY117544 1        | Civettictis civetta GLC19 1         | 0,14071362 |
| Eupleres goudotii D128 1            | Cynictis penicillata T375 1         | 0,14072175 |
| Salanoia concolor D378 1            | Mungos mungo/gambianus SRR7704821 1 | 0,14072509 |
| Mungotictis decemlineata NC027828 1 | Cynictis penicillata T375 1         | 0,14072566 |
| Poecilogale albinucha T602 1        | Meles leucurus NC039173 4           | 0,14073238 |
| Otocolobus manul NC028323 1         | Genetta servalina NC024568 2        | 0,14073573 |
| Viverricula indica XK891745 1       | Catopuma temminckii NC027115 41     | 0,14073846 |
| Lutra lutra NC011358 9              | Galictis vittata T412 1             | 0,1407398  |
| Taxidea taxus NC020646 1            | Neovison vison NC020641 3           | 0,14074993 |
| Nandinia binotata NC024567 1        | Fossa fossana D350 1                | 0,14078912 |
| Leopardus wiedii NC028318 1         | Civettictis civetta GLC19 1         | 0,14080222 |
| Salanoia concolor D378 1            | Ichneumia albicauda T603 1          | 0,14083008 |
| Leopardus colocolo NC028314 1       | Genetta servalina NC024568 2        | 0,14081778 |
| Civettictis civetta GLC19 1         | Catopuma temminckii NC027115 41     | 0,14087218 |
| Viverricula indica NC025296 2       | Puma concolor NC016470 22           | 0,14087228 |
| Nandinia binotata NC024567 1        | Leopardus colocolo NC028314 1       | 0,14088166 |
| Hemigaleus derbyanus MH464791 1     | Catopuma badia NC028300 1           | 0,14090793 |
| Mungotictis decemlineata NC027828 1 | Attilax paludinosus T606 1          | 0,14092635 |
| Xenogale naso C07XAR110 1           | Galidictis fasciata DM333 1         | 0,140927   |
| Viverricula indica XK891751 1       | Nandinia binotata NC024567 1        | 0,14093027 |
| Leopardus pardalis T262 1           | Genetta servalina NC024568 2        | 0,14093597 |
| Lynx pardinus NC028319 161          | Genetta servalina NC024568 2        | 0,14093645 |
| Leopardus pardalis NC028315 1       | Civettictis civetta GLC19 1         | 0,14093649 |
| Mustela eversmanni NC028013 1       | Galictis vittata T412 1             | 0,14095265 |
| Felis silvestris lybica KP202275 4  | Civettictis civetta NC033378 1      | 0,14096937 |
| Otocolobus manul NC028323 1         | Genetta abyssinica MG489822 1       | 0,14097464 |
| Gulo gulo NC009685 3                | Galictis vittata T412 1             | 0,14097911 |
| Prionailurus rubiginosus NC028304 2 | Genetta abyssinica MG489822 1       | 0,14098673 |
| Nyctereutes procyonoides NC013700 3 | Chrysocyon brachyurus NC024172 1    | 0,14099646 |
| Viverra zibetha T609 1              | Puma concolor NC016470 22           | 0,14100361 |
| Felis nigripes NC028309 1           | Civettictis civetta GLC19 1         | 0,14100444 |
| Leopardus wiedii NC028318 1         | Genetta abyssinica MG489822 20      | 0,14100587 |
| Viverricula indica XK891751 1       | Prionailurus bengalensis CKM45 20   | 0,14100657 |
| Viverricula indica NC025296 2       | Felis nigripes NC028309 1           | 0,14100678 |
| Taxidea taxus NC020646 1            | Mustela eversmanni NC028013 1       | 0,14101312 |
| Leopardus wiedii NC028318 1         | Civettictis civetta NC033378 1      | 0,1410345  |
| Leptailurus serval NC028316 1       | Civettictis civetta NC033378 1      | 0,14103824 |
| Prionailurus planiceps NC028312 6   | Civettictis civetta NC033378 1      | 0,14103933 |
| Leopardus jacobita NC028322 1       | Hemigaleus derbyanus MH464791 1     | 0,14105934 |
| Lobodon carcinophaga NC008423 1     | Callorhinus ursinus NC008415 1      | 0,14106432 |
| Fossa fossana D350 1                | Civettictis civetta GLC19 1         | 0,14106551 |
| Paguma larvata PDD511 2             | Leptailurus serval NC028316 1       | 0,14107093 |
| Viverricula indica XK891745 1       | Profelis aurata NC028299 1          | 0,14107139 |
| Viverricula indica NC025296 2       | Prionailurus viverrinus NC028305 1  | 0,14107412 |
| Mirounga leonina NC008422 1         | Eumetopias jubatus NC004030 10      | 0,14109118 |
| Poecilogale albinucha T602 1        | Gulo gulo NC009685 3                | 0,14110492 |
| Smilodon populator MF871700 1       | Nandinia binotata NC024567 1        | 0,14110847 |
| Mungos mungo/gambianus SRR7704821 1 | Eupleres goudotii D128 1            | 0,14112648 |
| Vulpes ferriata NC027935 1          | Canis mesomelas KT448280 1          | 0,14112729 |
| Mungotictis decemlineata NC027828 1 | Mungos mungo/gambianus SRR7704821 1 | 0,141129   |
| Viverricula indica NC025296 2       | Fossa fossana D350 1                | 0,14113729 |
| Mustela kathiah NC023210 1          | Lutrogale perspicillata NC035811 1  | 0,14113902 |
| Civettictis civetta GLC19 1         | Caracal caracal NC028306 1          | 0,14113948 |
| Viverricula indica XK891745 1       | Leopardus geoffroyi NC028320 1      | 0,14114265 |
| Taxidea taxus NC020646 1            | Melogale moschata V0735A 1          | 0,14115159 |
| Eumetopias jubatus NC004030 10      | Erignathus barbatus NC008426 1      | 0,1411608  |
| Mungos mungo MMC7 1                 | Galidictis fasciata DM333 1         | 0,14119992 |
| Viverricula indica XK891751 1       | Leopardus pardalis T262 1           | 0,14120351 |
| Lynx pardinus NC028319 161          | Civettictis civetta GLC19 1         | 0,14120577 |
| Mustela sibirica AP017394 11        | Galictis vittata T412 1             | 0,14122182 |
| Leopardus pardalis NC028315 1       | Civettictis civetta NC033378 1      | 0,14123614 |
| Lynx pardinus NC028319 161          | Civettictis civetta NC033378 1      | 0,14124246 |

|                                     |                                       |            |
|-------------------------------------|---------------------------------------|------------|
| Paguma larvata PDD511 2             | Ictonyx striatus T299 1               | 0,18424471 |
| Ictonyx striatus T299 1             | Felis catus NC001700 2                | 0,18424517 |
| Ursus arctos AP012576 6             | Martes americana NC020642 1           | 0,18424977 |
| Fossa fossana D350 1                | Canis lupus familiaris NC002008 1231  | 0,18425021 |
| Taxidea taxus NC020646 1            | Lycalopex schuerae KT448284 1         | 0,18425098 |
| Ursus arctos AP012576 6             | Genetta servalina NC024568 2          | 0,18425129 |
| Prionodon pardicolor NC024569 2     | Chrysocyon brachyurus NC024172 1      | 0,18425159 |
| Procyon lotor AB462049 4            | Acinonyx jubatus NC005212 3           | 0,18425186 |
| Ursus thibetanus laniger MH281753 2 | Paguma larvata PDD511 2               | 0,18425432 |
| Felis nigripes NC028309 1           | Chrysocyon brachyurus NC024172 1      | 0,18425545 |
| Spilogale putorius NC010497 1       | Chrotogale owstoni T607 1             | 0,18425621 |
| Chrysocyon brachyurus NC024172 1    | Caracal caracal NC028306 1            | 0,18425633 |
| Puma yagouaroundi NC028311 1        | Chrysocyon brachyurus NC024172 1      | 0,18425678 |
| Prionailurus bengalensis CKM45 20   | Helarctos malayanus NC009968 2        | 0,18426031 |
| Leopardus tigrinus NC028317 1       | Gulo gulo NC009685 3                  | 0,18426995 |
| Phoca vitulina NC001325 1           | Cuon alpinus NC013445 3               | 0,18427168 |
| Ursus spelaeus NC011112 8           | Leopardus colocolo NC028314 1         | 0,18427393 |
| Martes melampus NC009678 1          | Canis mesomelas KT448280 1            | 0,18427597 |
| Homotherium latidens MF871702 3     | Helarctos malayanus NC009968 2        | 0,18428141 |
| Paguma larvata PDD511 2             | Enhydra lutris NC009692 1             | 0,18428242 |
| Mustela sibirica NC020637 6         | Ursus semitorquatus MH464789 1        | 0,18428311 |
| Viverra zibetha T609 1              | Lutra lutra NC011358 9                | 0,18428354 |
| Mungos mungo MMC7 1                 | Arctocepalus townsendi NC008420 1     | 0,18428402 |
| Neophoca cinerea NC008419 1         | Mustela eversmanni NC028013 1         | 0,1842847  |
| Mustela kathiah NC023210 1          | Ursus arctos T413 1                   | 0,1842849  |
| Mungotictis decemlineata NC027828 1 | Martes zibellina NC011579 39          | 0,18428549 |
| Tremarctos ornatus NC009969 2       | Arctocepalus townsendi NC008420 1     | 0,18428561 |
| Smilodon populator MF871700 1       | Martes zibellina NC011579 39          | 0,18428932 |
| Melogale moschata NC020644 1        | Eupleres goudotii D128 1              | 0,18428999 |
| Potos flavius T414 1                | Mungotictis decemlineata NC027828 1   | 0,18429004 |
| Lutra lutra NC011358 9              | Leopardus tigrinus NC028317 1         | 0,18429323 |
| Puma concolor NC016470 22           | Ailuropus fulgens NC011124 1          | 0,18429443 |
| Vulpes corsac NC023958 1            | Viverra zibetha T609 1                | 0,18429458 |
| Prionodon pardicolor NC024569 2     | Melogale moschata KP726273 1          | 0,1842957  |
| Ursus arctos GU573491 207           | Arctocepalus australis MG023139 1     | 0,18429577 |
| Ursus arctos GU573491 207           | Martes pennanti NC020664 16           | 0,18429588 |
| Attilax paludinosus T606 1          | Arctodus simus NC011116 1             | 0,18429594 |
| Neophoca cinerea NC008419 1         | Galerella sanguinea T378 1            | 0,18429594 |
| Pardofelis marmorata NLN3 2         | Mustela sibirica AP017394 11          | 0,18429618 |
| Ursus arctos EU497665 29            | Fossa fossana D350 1                  | 0,18429668 |
| Ursus arctos isabellinus 18B5 2     | Arctocepalus gazella BK010918 1       | 0,18429686 |
| Poecilogale albinucha T602 1        | Phocarcus hookeri NC008418 1          | 0,18429694 |
| Profelis aurata NC028299 1          | Lutra sumatrana NC035810 1            | 0,18429719 |
| Ursus arctos GU573491 207           | Arctocepalus gazella BK010918 1       | 0,18429722 |
| Lynx lynx NC027083 4                | Arctocepalus australis MG023139 1     | 0,18429804 |
| Tremarctos ornatus NC009969 2       | Leopardus wiedii NC028318 1           | 0,1842986  |
| Pardofelis marmorata NLN3 2         | Martes zibellina NC011579 39          | 0,18429866 |
| Vulpes zerda KJ603240 1             | Viverricula indica NC025296 2         | 0,18429874 |
| Ursus maritimus NC003428 31         | Genetta abyssinica MG489822 1         | 0,18429932 |
| Felis nigripes NC028309 1           | Canis anthus NC027956 2               | 0,18430063 |
| Leopardus wiedii NC028318 1         | Arctocepalus gazella BK010918 1       | 0,18430093 |
| Prionailurus planiceps KY682741 4   | Canis latrans NC008093 7              | 0,18430144 |
| Zalophus wollebaeki SRR4431565 1    | Bassariscus neblina SRX10997850 1     | 0,18430148 |
| Procyon lotor AB462049 4            | Prionailurus planiceps KY682741 4     | 0,18430361 |
| Procyon lotor AB462049 4            | Prionailurus planiceps NC028312 6     | 0,18430382 |
| Enhydra lutris NC009692 1           | Ailuropoda melanoleuca NC009492 5     | 0,18430491 |
| Martes pennanti NC020664 16         | Catopuma badia NC028300 1             | 0,18430503 |
| Puma concolor NC016470 22           | Aonyx cinerea NC035814 2              | 0,18430515 |
| Ichneumia albicauda T603 1          | Canis aureus KT448274 1               | 0,18430628 |
| Martes pennanti NC020664 16         | Leopardus geoffroyi NC028320 1        | 0,1843065  |
| Felis catus NC001700 2              | Bassariscus sumichrasti SRX10999089 1 | 0,18430707 |
| Pardofelis marmorata NLN3 2         | Arctodus simus NC011116 1             | 0,18430752 |
| Ursus arctos GU573486 5             | Bassariscus sumichrasti SRX1099089 1  | 0,18431024 |
| Mustela putorius NC020638 4         | Arctictis binturong T605 2            | 0,18431038 |
| Ursus thibetanus mupinensis NC00875 | Felis catus NC001700 2                | 0,18431102 |
| Felis chaus NC028307 1              | Canis aureus KT448274 1               | 0,1843126  |
| Mustela putorius NC020638 4         | Melursus ursinus NC009970 2           | 0,18431424 |
| Diplogale hoesi MH464790 1          | Conepatus chinga NC042596 1           | 0,18431467 |
| Zalophus wollebaeki SRR4431565 1    | Leptailurus serval NC028316 1         | 0,18431503 |
| Ursus arctos GU573486 5             | Poecilogale albinucha T602 1          | 0,18431541 |
| Ursus arctos AP012576 6             | Civettictis civetta GLC19 1           | 0,18431824 |
| Ursus spelaeus EU327344 13          | Mustela altaica NC021751 1            | 0,18431975 |
| Ursus thibetanus formosanus NC0093  | Lynx pardinus NC028319 161            | 0,18431985 |
| Ursus spelaeus NC011112 8           | Paguma larvata PDD511 2               | 0,18432103 |
| Ursus spelaeus NC011112 8           | Prionailurus rubiginosus NC028304 2   | 0,18432385 |
| Panthera onca NC022842 1            | Ictonyx striatus T299 1               | 0,18432407 |
| Smilodon populator MF871700 1       | Melogale moschata KP726273 1          | 0,18432523 |
| Zalophus californianus NC008416 1   | Caracal caracal NC028306 1            | 0,1843297  |
| Leopardus guigna NC028321 1         | Canis lupus chanco NC010340 4         | 0,18433321 |
| Genetta abyssinica MG489822 1       | Canis mesomelas KT448280 1            | 0,18433474 |
| Otocolobus manul NC028323 1         | Canis mesomelas KT448280 1            | 0,18433514 |
| Helarctos malayanus NC009968 2      | Acinonyx jubatus NC005212 3           | 0,1843403  |
| Mustela kathiah NC023210 1          | Cuon alpinus NC013445 3               | 0,18434083 |
| Neofelis nebulosa NC008450 3        | Monachus schauinslandi NC008421 1     | 0,18434455 |
| Martes melampus NC009678 1          | Chrotogale owstoni T607 1             | 0,18434478 |
| Viverricula indica XK891745 1       | Spilogale putorius NC010497 1         | 0,18434589 |
| Felis silvestris lybica KP202275 4  | Canis mesomelas KT448280 1            | 0,18434609 |
| Martes melampus NC009678 1          | Canis anthus NC027956 2               | 0,18435143 |
| Zalophus wollebaeki SRR4431565 1    | Civettictis civetta NC033378 1        | 0,18435179 |
| Civettictis civetta NC033378 1      | Ailuropoda melanoleuca NC009492 5     | 0,1843521  |
| Mustela nigripes NC024942 1         | Cynictis penicillata T375 1           | 0,18435256 |
| Neophoca cinerea NC008419 1         | Mungos mungo MMC7 1                   | 0,18435423 |
| Viverricula indica XK891751 1       | Martes melampus NC009678 1            | 0,18435536 |
| Ursus thibetanus laniger MH281753 2 | Civettictis civetta NC033378 1        | 0,18435562 |
| Lutra lutra LC050126 1              | Galerella sanguinea T378 1            | 0,1843558  |
| Tremarctos ornatus NC009969 2       | Mustela eversmanni NC028013 1         | 0,18435606 |
| Tremarctos ornatus NC009969 2       | Phocarcus hookeri NC008418 1          | 0,18435609 |
| Paradoxurus jerdoni MH464793 1      | Lutra sumatrana NC035810 1            | 0,18435645 |
| Lutra lutra LC050126 1              | Caracal caracal NC028306 1            | 0,18435839 |
| Galerella sanguinea T378 1          | Callorhinus ursinus NC008415 1        | 0,18435898 |
| Conepatus chinga NC042596 1         | Civettictis civetta GLC19 1           | 0,18435919 |
| Ommatophoca rossii AY377287etc 1    | Melogale bennetti KY117544 1          | 0,18435986 |
| Vulpes vulpes NC008434 5            | Paguma larvata PDD511 2               | 0,1843611  |

|                                      |                                    |            |
|--------------------------------------|------------------------------------|------------|
| Poecilogale albinucha T602 1         | Martes pennanti NC020664 16        | 0,14128296 |
| Salanoia concolor D378 1             | Bdeogale nigripes GLC15 1          | 0,14133121 |
| Poecilogale albinucha T602 1         | Martes americana NC020642 1        | 0,14134029 |
| Viverra zibetha T609 1               | Puma yagouaroundi NC028311 1       | 0,14134055 |
| Felis chaus NC028307 1               | Civettictis civetta GLC19 1        | 0,14134172 |
| Mustela nivalis T306 5               | Meles anakuma NC009677 1           | 0,14134187 |
| Viverricula indica NC025296 2        | Caracal caracal NC028306 1         | 0,14134349 |
| Taxidea taxus NC020646 1             | Mustela altaica NC021751 1         | 0,14135858 |
| Pusa hispida NC 008433 1             | Callorhinus ursinus NC008415 1     | 0,14140247 |
| Cynogale bennetti KY117544 1         | Civettictis civetta NC033378 1     | 0,14141513 |
| Nandinia binotata NC024567 1         | Civettictis civetta NC033378 1     | 0,14143682 |
| Galidictis fasciata DM333 1          | Bdeogale nigripes GLC15 1          | 0,14146614 |
| Vulpes zerda KJ603240 1              | Hemigalus derbyanus MH464791 1     | 0,14146812 |
| Leopardus pardalis NC028315 1        | Genetta servalina NC024568 2       | 0,14147449 |
| Viverricula indica XK891745 1        | Felis nigripes NC028309 1          | 0,14147478 |
| Leopardus geoffroyi NC028320 1       | Civettictis civetta GLC19 1        | 0,14147913 |
| Neovison vison NC020641 3            | Lutrogale perspicillata NC035811 1 | 0,14148016 |
| Viverricula indica NC025296 2        | Leopardus geoffroyi NC028320 1     | 0,14148323 |
| Zalophus californianus NC008416 1    | Lobodon carinophaga NC008423 1     | 0,14149468 |
| Neovison vison NC020641 3            | Galictis vittata T412 1            | 0,14149676 |
| Homotherium latidens MF871702 3      | Civettictis civetta GLC19 1        | 0,14150123 |
| Puma yagouaroundi NC028311 1         | Hemigalus derbyanus MH464791 1     | 0,14152511 |
| Viverra tangalunga MH464792 1        | Meles anakuma NC009677 1           | 0,14153665 |
| Viverricula indica XK891745 1        | Leopardus jacobita NC028322 1      | 0,14154156 |
| Felis catus NC001700 2               | Civettictis civetta GLC19 1        | 0,14154291 |
| Viverricula indica NC025296 2        | Leopardus tigrinus NC028317 1      | 0,14154534 |
| Felis margarita NC028308 1           | Civettictis civetta NC033378 1     | 0,14157574 |
| Cynogale bennetti KY117544 1         | Arctictis binturong T605 2         | 0,14159773 |
| Leopardus geoffroyi NC028320 1       | Hemigalus derbyanus MH464791 1     | 0,14159901 |
| Homotherium latidens MF871702 3      | Hemigalus derbyanus MH464791 1     | 0,14160495 |
| Nandinia binotata NC024567 1         | Caracal caracal NC028306 1         | 0,14160763 |
| Taxidea taxus NC020646 1             | Mustela kathiah NC023210 1         | 0,14161819 |
| Monachus schauinslandi NC008421 1    | Eumetopias jubatus NC004030 10     | 0,14164017 |
| Leopardus geoffroyi NC028320 1       | Civettictis civetta NC033378 1     | 0,14164411 |
| Leopardus geoffroyi NC028320 1       | Genetta abyssinica MG489822 1      | 0,14166701 |
| Hydrurga leptonyx NC008425 1         | Arctocepalus gazella BK010918 1    | 0,14167391 |
| Puma yagouaroundi NC028311 1         | Civettictis civetta GLC19 1        | 0,14167778 |
| Viverra tangalunga MH464792 1        | Lutrogale perspicillata NC035811 1 | 0,14167798 |
| Lynx canadensis NC028313 1           | Genetta abyssinica MG489822 1      | 0,14168176 |
| Genetta servalina NC024568 2         | Acinonyx jubatus NC005212 3        | 0,14169019 |
| Otocyon megalotis SAF1 2             | Cuon alpinus NC013445 3            | 0,14169435 |
| Fossa fossana D350 1                 | Civettictis civetta NC033378 1     | 0,14170752 |
| Puma yagouaroundi NC028311 1         | Civettictis civetta NC033378 1     | 0,14171173 |
| Leopardus pardalis NC028315 1        | Hemigalus derbyanus MH464791 1     | 0,14172229 |
| Phoca fasciata NC008428 1            | Callorhinus ursinus NC008415 1     | 0,14173488 |
| Lynx lynx NC027083 4                 | Genetta abyssinica MG489822 1      | 0,14174782 |
| Martes martes T302 3                 | Galictis vittata T412 1            | 0,14175929 |
| Meles meles T303 3                   | Aonyx cinerea NC035814 2           | 0,14179958 |
| Puma yagouaroundi NC028311 1         | Genetta abyssinica MG489822 1      | 0,14180616 |
| Nandinia binotata NC024567 1         | Felis nigripes NC028309 1          | 0,14180954 |
| Lutrogale perspicillata NC035811 1   | Ictonyx striatus T299 1            | 0,14181145 |
| Poecilogale albinucha T602 1         | Aonyx cinerea NC035814 2           | 0,14181168 |
| Mungotictis decemlineata NC027828 1  | Ichneumia albicauda T603 1         | 0,14181282 |
| Viverricula indica XK891751 1        | Acinonyx jubatus NC005212 3        | 0,14182326 |
| Leopardus colocolo NC028314 1        | Genetta abyssinica MG489822 1      | 0,14182504 |
| Mustela altaica NC021751 1           | Galictis vittata T412 1            | 0,14183344 |
| Leptonychotes weddellii NC008424 1   | Arctocepalus forsteri KT693377 17  | 0,1418643  |
| Salanoia concolor D378 1             | Helogale parvula SRR7637809 1      | 0,14186925 |
| Viverra tangalunga MH464792 1        | Meles leucurus NC039173 4          | 0,14187498 |
| Pardofelis marmorata NLN3 2          | Nandinia binotata NC024567 1       | 0,14187682 |
| Viverra zibetha T609 1               | Lynx pardinus NC028319 1           | 0,14187843 |
| Viverricula indica XK891751 1        | Leptailurus serval NC028316 1      | 0,14187866 |
| Otocyon megalotis SAF1 2             | Chrysocyon brachyurus NC024172 1   | 0,14188126 |
| Genetta abyssinica MG489822 1        | Acinonyx jubatus NC005212 3        | 0,14188913 |
| Genetta abyssinica MG489822 1        | Fossa fossana D350 1               | 0,14193068 |
| Pusa sibirica NC008432 2             | Callorhinus ursinus NC008415 1     | 0,14193182 |
| Genetta abyssinica MG489822 1        | Felis nigripes NC028309 1          | 0,14193276 |
| Smilodon populator MF871700 1        | Genetta abyssinica MG489822 1      | 0,14193991 |
| Poecilogale albinucha T602 1         | Meles anakuma NC009677 1           | 0,14194375 |
| Viverricula indica XK891745 1        | Puma concolor NC016470 22          | 0,14194606 |
| Leopardus pardalis T262 1            | Genetta abyssinica MG489822 1      | 0,14194977 |
| Viverra zibetha T609 1               | Catopuma temminckii NC027115 41    | 0,14195053 |
| Viverra zibetha T609 1               | Leopardus geoffroyi NC028320 1     | 0,14195089 |
| Viverricula indica NC025296 2        | Catopuma temminckii NC027115 41    | 0,14195387 |
| Zalophus wolbeaeki SRR4431565 1      | Lobodon carinophaga NC008423 1     | 0,14195402 |
| Lutrogale perspicillata NC035811 1   | Gulo gulo NC009685 3               | 0,14197484 |
| Civettictis civetta NC033378 1       | Caracal caracal NC028306 1         | 0,14197776 |
| Prionailurus bengalensis CKM45 20    | Genetta abyssinica MG489822 1      | 0,14200956 |
| Viverricula indica XK891745 1        | Leopardus tigrinus NC028317 1      | 0,14201276 |
| Prionailurus rubiginosus NC028304 2  | Genetta genetta T297 1             | 0,14201573 |
| Viverricula indica XK891751 1        | Catopuma badia NC028300 1          | 0,14201808 |
| Taxidea taxus NC020646 1             | Meles anakuma NC009677 1           | 0,14201827 |
| Ictonyx striatus T299 1              | Galictis vittata T412 1            | 0,14203928 |
| Viverricula indica XK891745 1        | Leopardus wiedii NC028318 1        | 0,14208004 |
| Viverra zibetha T609 1               | Leopardus jacobita NC028322 1      | 0,14208062 |
| Prionailurus bengalensis NC028301 12 | Paguma larvata PDD511 2            | 0,14208063 |
| Viverricula indica XK891745 1        | Caracal caracal NC028306 1         | 0,14208128 |
| Martes melampus NC009678 1           | Galictis vittata T412 1            | 0,14208999 |
| Viverricula indica NC025296 2        | Homotherium latidens MF871702 3    | 0,14210999 |
| Leopardus pardalis T262 1            | Hemigalus derbyanus MH464791 1     | 0,14213343 |
| Viverra zibetha T609 1               | Lynx rufus NC014456 3              | 0,14214772 |
| Genetta servalina NC024568 2         | Felis chaus NC028307 1             | 0,14214976 |
| Prionailurus viverrinus NC028305 1   | Genetta genetta T297 1             | 0,14215058 |
| Zalophus californianus NC008416 1    | Mirounga leonina NC008422 1        | 0,14215723 |
| Mustela kathiah NC023210 1           | Galictis vittata T412 1            | 0,14216217 |
| Felis nigripes NC028309 1            | Civettictis civetta NC033378 1     | 0,14217849 |
| Hemigalus derbyanus MH464791 1       | Acinonyx jubatus NC005212 3        | 0,14218308 |
| Civettictis civetta NC033378 1       | Catopuma temminckii NC027115 41    | 0,14218412 |
| Leptonychotes weddellii NC008424 1   | Arctocepalus australis MG023139 1  | 0,14220087 |
| Hydrurga leptonyx NC008425 1         | Arctocepalus forsteri KT693377 17  | 0,14221221 |
| Viverricula indica XK891751 1        | Leopardus pardalis NC028315 1      | 0,14221349 |
| Zalophus wolbeaeki SRR4431565 1      | Leptonychotes weddellii NC008424 1 | 0,14221364 |
| Ichneumia albicauda T603 1           | Galidictis fasciata DM333 1        | 0,14221482 |

|                                       |                                      |            |
|---------------------------------------|--------------------------------------|------------|
| Lutra lutra LC050126 1                | Cryptothroca ferox FC13 1            | 0,18436207 |
| Panthera onca KP202264 2              | Callorhinus ursinus NC008415 1       | 0,18436219 |
| Panthera onca KP202264 2              | Mustela nigripes NC024942 1          | 0,18436417 |
| Lycyaon pictus NC028427 2             | Galerella sanguinea T378 1           | 0,18436457 |
| Mustela sibirica NC020637 6           | Felis chaus NC028307 1               | 0,18436517 |
| Prionailurus bengalensis NC028301 12  | Arctocepalus australis MG023139 1    | 0,18436552 |
| Vulpes lagopus NC026529 3             | Pardofelis marmorata NLN3 2          | 0,18436535 |
| Lynx canadensis NC028313 1            | Arctocepalus australis MG023139 1    | 0,18436547 |
| Mustela sibirica NC020637 6           | Genetta genetta T297 1               | 0,18436554 |
| Vulpes vulpes NC008434 5              | Neovison vison NC020641 3            | 0,18436563 |
| Lynx rufus NC014456 3                 | Arctocepalus australis MG023139 1    | 0,18436569 |
| Otocolobus manul NC028323 1           | Melogale moschata KP726273 1         | 0,184366   |
| Prionailurus planiceps KY682741 4     | Arctocepalus gazella BK010918 1      | 0,18436612 |
| Tremarctos ornatus NC009969 2         | Catopuma temminckii NC027115 41      | 0,18436639 |
| Prionodon pardicolor NC024569 2       | Mustela itatsi NC034330 19           | 0,18436672 |
| Ursus maritimus GUS73488 Svalbard     | Phocarcos hookeri NC008418 1         | 0,18436709 |
| Nyctereutes procyonoides NC013700 3   | Lynx canadensis NC028313 1           | 0,18436773 |
| Leopardus pardalis NC028315 1         | Arctocepalus gazella BK010918 1      | 0,18436776 |
| Vulpes corsac NC023958 1              | Prionailurus bengalensis CKM45 20    | 0,18436931 |
| Ursus arctos EU497665 29              | Arctonyx collaris NC020645 1         | 0,18436982 |
| Viverricula indica NC025296 2         | Otocyon megalotis SAF1 2             | 0,18437064 |
| Ursus arctos GUS73486 5               | Ehnydra lutris NC009692 1            | 0,1843708  |
| Ursus arctos AP012576 6               | Taxidea taxus NC020646 1             | 0,18437089 |
| Panthera onca KP202264 2              | Neovison vison NC020641 3            | 0,18437146 |
| Poecilogale albinucha T602 1          | Leopardus wiedii NC028318 1          | 0,18437274 |
| Ursus arctos GUS73491 207             | Genetta servalina NC024568 2         | 0,18437245 |
| Panthera tigris amoyensis NC014770 2  | Mustela kathiah NC023210 1           | 0,18437277 |
| Otocolobus manul NC028323 1           | Melogale moschata NC020644 1         | 0,18437289 |
| Panthera onca KP202264 2              | Mustela nivalis T306 5               | 0,18437344 |
| Odobenus rosmarus NC004029 29         | Lutra sumatrana NC035810 1           | 0,18437557 |
| Melursus ursinus NC009970 2           | Mustela moschata KP726273 1          | 0,18437579 |
| Ursus thibetanus formosanus NC0093    | Chrotogale owstoni T607 1            | 0,18437648 |
| Panthera leo spelaea KX258452 2       | Mustela kathiah NC023210 1           | 0,18437657 |
| Ursus arctos GUS73486 5               | Phocarcos hookeri NC008418 1         | 0,18437676 |
| Ictonyx striatus T299 1               | Felis margarita NC028308 1           | 0,18438035 |
| Ursa semitorquata MH464789 1          | Canis lupus chanco NC010340 4        | 0,18438154 |
| Paradoxurus hermaphroditus NLNC 1     | Lycyaon pictus NC028427 2            | 0,18438262 |
| Mustela nigripes NC024942 1           | Arctocepalus forsteri NC004023 28    | 0,18438405 |
| Paradoxurus hermaphroditus NC03959    | Ailuropoda melanoleuca NC009492 5    | 0,18438685 |
| Ursus thibetanus laniger MH281753 2   | Leopardus jacobita NC028322 1        | 0,18438943 |
| Ursus thibetanus laniger MH281753 2   | Leopardus tigrinus NC028317 1        | 0,18438944 |
| Potos flavus T414 1                   | Diplogale hosei MH464790 1           | 0,18439053 |
| Chrotogale owstoni T607 1             | Tapirus terrestris T358              | 0,18439388 |
| Melursus ursinus NC009970 2           | Catopuma badia NC028300 1            | 0,18439448 |
| Martes flavigula NC012141 3           | Bdeogale nigripes GLC15 1            | 0,18439636 |
| Otocolobus manul NC028323 1           | Lycalopex schuereae KT448284 1       | 0,18439645 |
| Lycyaon pictus NC028427 2             | Leopardus colocolo NC028314 1        | 0,18439899 |
| Ursus thibetanus thibetanus NC011118  | Ictonyx striatus T299 1              | 0,18440016 |
| Ursus americanus JX196366 3           | Leopardus pardalis NC028315 1        | 0,18440701 |
| Lycalopex schuereae KT448284 1        | Leopardus colocolo NC028314 1        | 0,18440759 |
| Prionailurus planiceps KY682741 4     | Canis mesomelas KT448280 1           | 0,18440869 |
| Ictonyx striatus T299 1               | Hemigalus derbyanus MH464791 1       | 0,18440963 |
| Canis lupus chanco NC010340 4         | Arctodus simus NC011116 1            | 0,1844101  |
| Ursus americanus JX196366 3           | Catopuma temminckii NC027115 41      | 0,1844115  |
| Fossa fossana D350 1                  | Tapirus terrestris T358              | 0,18441154 |
| Lutra sumatrana NC035810 1            | Chrotogale owstoni T607 1            | 0,18441154 |
| Martes melampus NC009678 1            | Ursa semitorquata MH464789 1         | 0,18441294 |
| Mungos mungo/gambianus SRR77048       | Meles leucurus NC039173 4            | 0,18441543 |
| Meles leucurus NC039173 4             | Ursa javanica T413 1                 | 0,18441668 |
| Ictonyx striatus T299 1               | Civettictis civetta NC033378 1       | 0,18441711 |
| Viverra tangalunga MH464792 1         | Attilax paludinosus T606 1           | 0,18441913 |
| Mustela itatsi NC034330 19            | Attilax paludinosus T606 1           | 0,18441929 |
| Mustela nigripes NC024942 1           | Ursa javanica T413 1                 | 0,18441974 |
| Leopardus pardalis T262 1             | Conepatus chinga NC042596 1          | 0,18442116 |
| Poecilogale albinucha T602 1          | Chrotogale owstoni T607 1            | 0,18442225 |
| Lutrogale perspicillata NC035811 1    | Crossarchus platycephalus C7R66 1    | 0,18442358 |
| Bassaricyon neblina SRR1097850 1      | Arctocepalus pusillus NC008417 1     | 0,18442394 |
| Arctocepalus australis MG023139 1     | Aonyx cinerea NC035814 2             | 0,18442409 |
| Martes martes T302 3                  | Xenogale naso C07XAR110 1            | 0,18442424 |
| Ursa javanica T413 1                  | Bassaricyon sumichrasti SRR1099089 1 | 0,18442659 |
| Felis chaus NC028307 1                | Callorhinus ursinus NC008415 1       | 0,18442838 |
| Felis silvestris lybica KP202275 4    | Callorhinus ursinus NC008415 1       | 0,18442877 |
| Catopuma temminckii NC027115 41       | Callorhinus ursinus NC008415 1       | 0,18442887 |
| Vulpes zerda KJ603240 1               | Phoca groenlandica NC008429 54       | 0,18442969 |
| Ursus arctos isabellinus 1885 2       | Melogale moschata V0735A 1           | 0,18443067 |
| Potos flavus T414 1                   | Pardofelis marmorata NLN3 2          | 0,18443197 |
| Cryptothroca ferox FC13 1             | Callorhinus ursinus NC008415 1       | 0,18443242 |
| Potos flavus T414 1                   | Caracal caracal NC028306 1           | 0,18443254 |
| Lynx lynx NC027083 4                  | Arctocepalus forsteri KT693377 17    | 0,18443258 |
| Prionailurus bengalensis NC028301 12  | Melogale moschata V0735A 1           | 0,18443312 |
| Vulpes corsac NC023958 1              | Prionailurus bengalensis NC028301 12 | 0,18443374 |
| Mungotictis decemlineata NC027828     | Arctodus simus NC011116 1            | 0,18443391 |
| Vulpes zerda KJ603240 1               | Phoca vitulina NC001325 1            | 0,18443534 |
| Ursus arctos EU497665 29              | Neophoca cinerea NC008419 1          | 0,18443562 |
| Tremarctos ornatus NC009969 2         | Leopardus geoffroyi NC028320 1       | 0,18443574 |
| Urocyon littoralis catalinae KP129018 | Mirounga angustirostris SRR10331586  | 0,18443623 |
| Ursus arctos isabellinus 1885 2       | Arctonyx collaris NC020645 1         | 0,18443669 |
| Procyon lotor AB462049 4              | Felis nigripes NC028309 1            | 0,1844378  |
| Prionailurus planiceps KY682741 4     | Arctocepalus pusillus NC008417 1     | 0,18443801 |
| Procyon lotor AB462046 3              | Felis nigripes NC028309 1            | 0,18443826 |
| Smilodon populator MF871700 1         | Phocarcos hookeri NC008418 1         | 0,18443848 |
| Panthera onca NC022842 1              | Lutra lutra LC050126 1               | 0,18443927 |
| Puma yagouaroundi NC028311 1          | Arctocepalus pusillus NC008417 1     | 0,18443949 |
| Martes pennanti NC020664 16           | Felis silvestris lybica KP202275 4   | 0,18443991 |
| Poecilogale albinucha T602 1          | Arctotherium sp NC030174 1           | 0,1844402  |
| Prionailurus planiceps KY682741 4     | Arctotherium sp NC030174 1           | 0,18444031 |
| Leopardus guigna NC028321 1           | Aonyx cinerea NC035814 2             | 0,18444046 |
| Taxidea taxus NC020646 1              | Chrysocyon brachyurus NC024172 1     | 0,18444195 |
| Viverra tangalunga MH464792 1         | Chrysocyon brachyurus NC024172 1     | 0,18444243 |
| Panthera tigris amoyensis NC014770 2  | Mustela erminea T305 2               | 0,18444288 |
| Ursus arctos isabellinus 1885 2       | Profelis aurata NC028299 1           | 0,18444538 |
| Ursus arctos isabellinus 1885 2       | Martes foina NC020643 1              | 0,18444586 |
| Viverricula indica XK891745 1         | Ictonyx striatus T299 1              | 0,18444626 |

|                                          |                                       |            |
|------------------------------------------|---------------------------------------|------------|
| Viverricula indica XK891751 1            | Leopardus colocolo NC028314 1         | 0,14223126 |
| Homotherium latidens MF871702 3          | Civettictis civetta NC033378 1        | 0,14224084 |
| Vulpes vulpes NC008434 5                 | Lycalopex sechurae KT448284 1         | 0,1422603  |
| Urocyon cinereoargenteus NC026723 21     | Canis latrans NC008093 7              | 0,14226082 |
| Lynx lynx NC027083 4                     | Civettictis civetta GLC19 1           | 0,14228275 |
| Zalophus californianus NC008416 1        | Leptonychotes weddellii NC008424 1    | 0,14229339 |
| Nandinia binotata NC024567 1             | Crossarchus platycephalus C7R66 1     | 0,14233774 |
| Phoca groenlandica NC008429 54           | Callorhinus ursinus NC008415 1        | 0,14234082 |
| Leptonychotes weddellii NC008424 1       | Arctocephalus gazella BK010918 1      | 0,14240336 |
| Vulpes lagopus NC026529 3                | Canis mesomelas KT448280 1            | 0,14240423 |
| Meles leucurus NC039173 4                | Aonyx cinerea NC035814 2              | 0,14240527 |
| Viverricula indica XK891751 1            | Leopardus wiedii NC028318 1           | 0,1424159  |
| Hemigalus derbyanus MH464791 1           | Caracal caracal NC028306 1            | 0,14241596 |
| Viverricula indica XK891745 1            | Felis silvestris lybica KP202275 4    | 0,14241751 |
| Genetta servalina NC024568 2             | Felis margarita NC028308 1            | 0,14241862 |
| Prionailurus bengalensis CKM45 20        | Paguma larvata PDD511 2               | 0,14242075 |
| Leopardus guigna NC028321 1              | Hemigalus derbyanus MH464791 1        | 0,14242192 |
| Prionailurus bengalensis CKM45 20        | Genetta genetta T297 1                | 0,14242228 |
| Taxidea taxus NC020646 1                 | Mustela nivalis T306 5                | 0,1424356  |
| Prionailurus bengalensis CKM45 20        | Hemigalus derbyanus MH464791 1        | 0,14243667 |
| Felis catus NC001700 2                   | Civettictis civetta NC033378 1        | 0,14243139 |
| Cystophora cristata NC008427 1           | Callorhinus ursinus NC008415 1        | 0,14246973 |
| Arctonyx collaris NC020645 1             | Aonyx cinerea NC035814 2              | 0,14247258 |
| Eupleres goodii D128 1                   | Attilax paludinosus T606 1            | 0,1424731  |
| Nandinia binotata NC024567 1             | Genetta genetta T297 1                | 0,1424804  |
| Poecilogale albinocha T602 1             | Melogale moschata V0735A 1            | 0,14248399 |
| Genetta servalina NC024568 2             | Catopuma badia NC028300 1             | 0,14248897 |
| Prionailurus bengalensis NC028301 12     | Arctictis binturong T605 2            | 0,14249776 |
| Arctictis binturong T605 2               | Acinonyx jubatus NC005212 3           | 0,14250831 |
| Urva javanica/auropunctata NC006835 1    | Galidictis fasciata DM333 1           | 0,14251265 |
| Pusa caspica NC008431 1                  | Callorhinus ursinus NC008415 1        | 0,14253761 |
| Zalophus wollebaeki SRR4431565 1         | Mirounga leonina NC008422 1           | 0,14254895 |
| Galerella sanguinea T378 1               | Cryptoprocta ferox CF13 1             | 0,14255834 |
| Urocyon littoralis catalinae KP129018 15 | Canis latrans NC008093 7              | 0,14259745 |
| Viverra zibetha T609 1                   | Smilodon populator MF871700 1         | 0,14261273 |
| Vulpes zerda K1603240 1                  | Lycalopex sechurae KT448284 1         | 0,14261304 |
| Leopardus pardalis T262 1                | Fossa fossana D350 1                  | 0,14261954 |
| Profelis aurata NC028299 1               | Civettictis civetta GLC19 1           | 0,14262099 |
| Melogale moschata NC020644 1             | Galictis vittata T412 1               | 0,14263058 |
| Viverricula indica XK891745 1            | Smilodon populator MF871700 1         | 0,14263469 |
| Prionailurus rubiginosus NC028304 2      | Hemigalus derbyanus MH464791 1        | 0,14264055 |
| Hydrurga leptonyx NC008425 1             | Arctocephalus pusillus NC008417 1     | 0,14268832 |
| Lynx lynx NC027083 4                     | Civettictis civetta NC033378 1        | 0,14272478 |
| Ichneumia albicauda T603 1               | Eupleres goodii D128 1                | 0,14275366 |
| Viverricula indica XK891745 1            | Felis chaus NC028307 1                | 0,14275476 |
| Puma concolor NC016470 22                | Genetta servalina NC024568 2          | 0,14275508 |
| Prionailurus viverrinus NC028305 1       | Genetta abyssinica MG489822 1         | 0,14276293 |
| Mungotictis decemlineata NC027828 1      | Mungos mungo MMC7 1                   | 0,14281464 |
| Lobodon carinophaga NC008423 1           | Arctocephalus forsteri KF693377 17    | 0,14281777 |
| Viverra zibetha T609 1                   | Felis chaus NC028307 1                | 0,14282237 |
| Genetta servalina NC024568 2             | Felis silvestris lybica KP202275 4    | 0,14282241 |
| Genetta servalina NC024568 2             | Felis nigripes NC028309 1             | 0,14282268 |
| Salanoia concolor D378 1                 | Urva javanica/auropunctata NC006835 1 | 0,14284892 |
| Genetta servalina NC024568 2             | Fossa fossana D350 1                  | 0,14288312 |
| Viverricula indica XK891751 1            | Prionailurus viverrinus NC028305 1    | 0,14288813 |
| Viverricula indica NC025296 2            | Felis chaus NC028307 1                | 0,14289233 |
| Martes zibellina NC011579 39             | Galictis vittata T412 1               | 0,14289321 |
| Leopardus tigrinus NC028317 1            | Genetta abyssinica MG489822 1         | 0,14289418 |
| Martes foina NC020643 1                  | Galictis vittata T412 1               | 0,14289618 |
| Prionodon pardicolor NC024569 2          | Leopardus pardalis NC028315 1         | 0,14290223 |
| Leptailurus serval NC028316 1            | Genetta genetta T297 1                | 0,1429586  |
| Paguma larvata PDD511 2                  | Catopuma badia NC028300 1             | 0,14296192 |
| Leopardus jacobita NC028322 1            | Genetta abyssinica MG489822 1         | 0,14296772 |
| Catopuma badia NC028300 1                | Arctictis binturong T605 2            | 0,14297596 |
| Homotherium latidens MF871702 3          | Genetta abyssinica MG489822 1         | 0,14301282 |
| Salanoia concolor D378 1                 | Mungos mungo MMC7 1                   | 0,14301716 |
| Viverricula indica XK891751 1            | Leopardus jacobita NC028322 1         | 0,14302216 |
| Viverricula indica XK891751 1            | Puma yagouaroundi NC028311 1          | 0,14302331 |
| Viverricula indica XK891745 1            | Prionailurus planiceps KY682741 4     | 0,14302337 |
| Prionailurus planiceps NC028312 6        | Genetta servalina NC024568 2          | 0,14302437 |
| Prionailurus planiceps KY682741 4        | Genetta servalina NC024568 2          | 0,14302443 |
| Prionailurus planiceps NC028312 6        | Genetta abyssinica MG489822 1         | 0,14303313 |
| Paguma larvata PDD511 2                  | Leopardus colocolo NC028314 1         | 0,14303915 |
| Lynx rufus NC014456 3                    | Genetta abyssinica MG489822 1         | 0,1430475  |
| Genetta servalina NC024568 2             | Cynogale benetti KY117544 1           | 0,1430711  |
| Viverra zibetha T609 1                   | Lynx lynx NC027083 4                  | 0,14309011 |
| Paradoxurus hermaphroditus NLNC 1        | Leptailurus serval NC028316 1         | 0,14309014 |
| Leopardus jacobita NC028322 1            | Genetta servalina NC024568 2          | 0,14309125 |
| Viverricula indica NC025296 2            | Leopardus guigna NC028321 1           | 0,14309955 |
| Prionodon pardicolor NC024569 2          | Leopardus pardalis T262 1             | 0,14310439 |
| Smilodon populator MF871700 1            | Genetta servalina NC024568 2          | 0,14311649 |
| Leopardus tigrinus NC028317 1            | Hemigalus derbyanus MH464791 1        | 0,1431292  |
| Meles anakuma NC009677 1                 | Aonyx cinerea NC035814 2              | 0,14314556 |
| Nandinia binotata NC024567 1             | Mungotictis decemlineata NC027828 1   | 0,1431485  |
| Urva semitorquata MH464789 1             | Cryptoprocta ferox CF13 1             | 0,14315437 |
| Paguma larvata PDD511 2                  | Leopardus pardalis T262 1             | 0,14315623 |
| Prionailurus viverrinus NC028305 1       | Civettictis civetta GLC19 1           | 0,14315987 |
| Prionailurus planiceps NC028312 6        | Genetta genetta T297 1                | 0,14316054 |
| Viverricula indica NC025296 2            | Felis silvestris lybica KP202275 4    | 0,14316173 |
| Viverricula indica XK891751 1            | Leopardus geoffroyi NC028320 1        | 0,14316286 |
| Genetta abyssinica MG489822 1            | Caracal caracal NC028306 1            | 0,14317612 |
| Mungotictis decemlineata NC027828 1      | Urva javanica/auropunctata NC006835 1 | 0,14318494 |
| Prionailurus viverrinus NC028305 1       | Civettictis civetta NC033378 1        | 0,14319517 |
| Xenogale naso C07XAR110 1                | Eupleres goodii D128 1                | 0,14321236 |
| Monachus monachus NC004972 5             | Eumetopias jubatus NC004030 10        | 0,14321844 |
| Monachus schauinslandi NC008421 1        | Callorhinus ursinus NC008415 1        | 0,14321876 |
| Nandinia binotata NC024567 1             | Leopardus tigrinus NC028317 1         | 0,14322557 |
| Puma yagouaroundi NC028311 1             | Genetta servalina NC024568 2          | 0,14322665 |
| Prionailurus planiceps KY682741 4        | Genetta abyssinica MG489822 1         | 0,14324124 |
| Martes flavigula NC012141 3              | Galictis vittata T412 1               | 0,14327352 |
| Erignathus barbatus NC008426 1           | Callorhinus ursinus NC008415 1        | 0,14327678 |
| Mungotictis decemlineata NC027828 1      | Helogale parvula SRR7637809 1         | 0,14328319 |
| Nandinia binotata NC024567 1             | Galidictis fasciata DM333 1           | 0,14328367 |

|                                        |                                      |            |
|----------------------------------------|--------------------------------------|------------|
| Prionailurus viverrinus NC028305 1     | Lycaon pictus NC028427 2             | 0,18444899 |
| Martes foina NC020643 1                | Canis aureus KT448274 1              | 0,18445064 |
| Otocolobus manul NC028323 1            | Lycaon pictus NC028427 2             | 0,18445121 |
| Urocyon thibetanus formosanus NC009933 | Lynx canadensis NC028313 1           | 0,18445365 |
| Urocyon thibetanus mupinensis NC008775 | Canis aureus KT448274 1              | 0,18445846 |
| Mungos mungo/gambianus SRR77048        | Martes flavigula NC012141 3          | 0,18445939 |
| Zalophus californianus NC008416 1      | Felis silvestris lybica KP202275 4   | 0,18446319 |
| Spilogale putorius NC010497 1          | Arctodus simus NC011116 1            | 0,18446869 |
| Galidictis fasciata DM333 1            | Eumetopias jubatus NC004030 10       | 0,18446918 |
| Gulo gulo NC009685 3                   | Felis nigripes NC028309 1            | 0,18447483 |
| Mirounga leonina NC008422 1            | Tapirus terrestris T358              | 0,18447854 |
| Lutra lutra LC050126 1                 | Urva javanica T413 1                 | 0,18447903 |
| Civettictis civetta NC033378 1         | Aonyx cinerea NC035814 2             | 0,18447979 |
| Ursus arctos EU497665 29               | Canis adustus KT448271 1             | 0,18448125 |
| Ursus maritimus GU573488 Svalbard      | Gulo gulo NC009685 3                 | 0,1844843  |
| Mustela nigripes NC024942 1            | Arctocephalus forsteri KF693377 17   | 0,1844845  |
| Urva javanica T413 1                   | Arctonyx collaris NC020645 1         | 0,18448536 |
| Phocartos hookeri NC008418 1           | Fossa fossana D350 1                 | 0,18448575 |
| Mustela itata NC034330 19              | Xenogale naso C07XAR110 1            | 0,184487   |
| Vulpes zerda K1603240 1                | Crossarchus platycephalus C7R66 1    | 0,18448958 |
| Martes pennanti NC020664 16            | Urva semitorquata MH464789 1         | 0,18449025 |
| Galidictis fasciata DM333 1            | Arctonyx collaris NC020645 1         | 0,18449053 |
| Arctocephalus forsteri KF693377 17     | Aonyx cinerea NC035814 2             | 0,1844915  |
| Lutra lutra NC011358 9                 | Catopuma temminckii NC027115 41      | 0,18449228 |
| Pardofelis marmorata NLN3 2            | Lutra lutra LC050126 1               | 0,18449438 |
| Mustela sibirica NC020637 6            | Diplogale hoesi MH464790 1           | 0,18449485 |
| Panthera onca KP202264 2               | Lutra lutra NC011358 9               | 0,18449587 |
| Monachus schauinslandi NC008421 1      | Tapirus terrestris T358              | 0,18449678 |
| Prionailurus rubiginosus NC028304 2    | Aillurus fulgens NC011124 1          | 0,18449703 |
| Ursus arctos pruinosus MG066703 3      | Martes zibellina NC011579 39         | 0,18449801 |
| Ursus maritimus NC003428 31            | Martes pennanti NC020664 16          | 0,18449881 |
| Lycaon pictus NC028427 2               | Fossa fossana D350 1                 | 0,18449835 |
| Mustela sibirica AP017394 11           | Ichneumia albicauda T603 1           | 0,184499   |
| Paradoxurus hermaphroditus NC03959     | Mustela itatai NC034330 19           | 0,1844992  |
| Vulpes ferrillata NC027935 1           | Phoca vitulina NC001325 1            | 0,18450065 |
| Leopardus pardalis NC028315 1          | Arctocephalus australis MG023139 1   | 0,18450125 |
| Leopardus pardalis T262 1              | Arctocephalus australis MG023139 1   | 0,18450157 |
| Martes zibellina NC011579 39           | Caracal caracal NC028306 1           | 0,18450217 |
| Prionailurus planiceps NC028312 6      | Lontra canadensis SRR10409165 1      | 0,18450221 |
| Pusa hispida NC 008433 1               | Paradoxurus hermaphroditus NC03959   | 0,18450238 |
| Felis silvestris lybica KP202275 4     | Arctocephalus pusillus NC008417 1    | 0,18450569 |
| Ursus arctos EU497665 29               | Genetta servalina NC024568 2         | 0,18450719 |
| Paradoxurus hermaphroditus NC03959     | Canis mesomelas KT448280 1           | 0,18450768 |
| Otocolobus manul NC028323 1            | Martes pennanti NC020664 16          | 0,18450789 |
| Nandinia binotata NC024567 1           | Ailluropoda melanoleuca NC009492 5   | 0,18450814 |
| Mustela nivalis T306 5                 | Felis catus NC001700 2               | 0,18450883 |
| Otocyon megalotis SAF1 2               | Leopardus jacobita NC028322 1        | 0,18450962 |
| Otocyon megalotis SAF1 2               | Catopuma badia NC028300 1            | 0,18450968 |
| Otocyon megalotis SAF1 2               | Leopardus geoffroyi NC028320 1       | 0,18451089 |
| Lycaon pictus NC028427 2               | Genetta servalina NC024568 2         | 0,18451367 |
| Urocyon thibetanus mupinensis NC008775 | Prionailurus planiceps KY682741 4    | 0,18451372 |
| Ictonyx striatus T299 1                | Civettictis civetta GLC19 1          | 0,18451409 |
| Zalophus wollebaeki SRR4431565 1       | Leopardus wiedii NC028318 1          | 0,18451816 |
| Mustela erminea T305 2                 | Ailluropoda melanoleuca NC009492 5   | 0,18451992 |
| Urocyon thibetanus formosanus NC009933 | Genetta genetta T297 1               | 0,18452001 |
| Genetta servalina NC024568 2           | Chrysoyon brachyurus NC024172 1      | 0,18452069 |
| Urocyon thibetanus laniger MH281753 2  | Felis catus NC001700 2               | 0,18452361 |
| Homotherium latidens MF871702 3        | Arctocephalus townsendi NC008420 1   | 0,18452364 |
| Leopardus pardalis T262 1              | Galictis vittata T412 1              | 0,18452455 |
| Ursus spelaeus NC011112 8              | Prionailurus bengalensis NC028301 12 | 0,18452646 |
| Otaria byronia OTAB 1                  | Acinonyx jubatus NC005212 3          | 0,1845268  |
| Smilodon populator MF871700 1          | Arctocephalus forsteri KF693377 17   | 0,18452908 |
| Hemigalus derbyanus MH464791 1         | Canis mesomelas KT448280 1           | 0,1845292  |
| Zalophus californianus NC008416 1      | Felis nigripes NC028309 1            | 0,18453008 |
| Urocyon thibetanus formosanus NC009933 | Acinonyx jubatus NC005212 3          | 0,18453392 |
| Spilogale putorius NC010497 1          | Martes pennanti NC020664 16          | 0,18454242 |
| Ursus americanus JX196366 3            | Mustela altaica NC021751 1           | 0,18454449 |
| Mungos mungo/gambianus SRR77048        | Arctonyx collaris NC020645 1         | 0,18455043 |
| Mungos mungo/gambianus SRR77048        | Martes zibellina NC011579 39         | 0,18455151 |
| Mustela nigripes NC024942 1            | Urva semitorquata MH464789 1         | 0,18455282 |
| Mungos mungo/gambianus SRR77048        | Arctocephalus australis MG023139 1   | 0,18455333 |
| Phocartos hookeri NC008418 1           | Mustela sibirica AP017394 11         | 0,18455346 |
| Mungos mungo MMC7 1                    | Canis anthus NC027956 2              | 0,18455476 |
| Mungos mungo MMC7 1                    | Canis latrans NC008093 7             | 0,18455495 |
| Mungotictis decemlineata NC027828      | Meles anakuma NC009677 1             | 0,18455714 |
| Ursus arctos GU573486 5                | Gulo gulo NC009685 3                 | 0,18455768 |
| Leopardus wiedii NC028318 1            | Tapirus terrestris T358              | 0,18455797 |
| Prionailurus bengalensis NC028301 12   | Conepatus chinga NC024596 1          | 0,18455897 |
| Meles meles T303 3                     | Galerella sanguinea T378 1           | 0,1845599  |
| Profelis aurata NC028299 1             | Lutra lutra NC011358 9               | 0,18456006 |
| Genetta servalina NC024568 2           | Arctocephalus townsendi NC008420 1   | 0,18456072 |
| Leopardus pardalis NC028315 1          | Aillurus fulgens styani NC009691 1   | 0,18456098 |
| Poecilogale albinocha T602 1           | Canis adustus KT448271 1             | 0,18456307 |
| Urocyon thibetanus mupinensis NC008775 | Lutra lutra NC011358 9               | 0,1845635  |
| Melursus ursinus NC009970 2            | Hemigalus derbyanus MH464791 1       | 0,1845638  |
| Ursus arctos GU573491 207              | Arctocephalus townsendi NC008420 1   | 0,18456455 |
| Neovison vison NC020641 3              | Cynictis penicillata T375 1          | 0,18456502 |
| Ursus maritimus GU573488 Svalbard      | Arctocephalus australis MG023139 1   | 0,18456519 |
| Mungos mungo/gambianus SRR77048        | Arctodus simus NC011116 1            | 0,18456542 |
| Profelis aurata NC028299 1             | Potos flavus T414 1                  | 0,18456687 |
| Ursus arctos AP012576 6                | Martes flavigula NC012141 3          | 0,18456693 |
| Vulpes ferrillata NC027935 1           | Leopardus pardalis NC028315 1        | 0,18456757 |
| Tramectos ornatus NC009969 2           | Leopardus pardalis NC028315 1        | 0,1845677  |
| Vulpes lagopus NC026529 3              | Puma concolor NC016470 22            | 0,1845679  |
| Prionodon pardicolor NC024569 2        | Mustela sibirica AP017394 11         | 0,18456812 |
| Leopardus pardalis T262 1              | Arctocephalus forsteri KF693377 17   | 0,18456876 |
| Paradoxurus hermaphroditus NC03959     | Canis anthus NC027956 2              | 0,18456894 |
| Viverra tangalunga MH464792 1          | Prionodon pardicolor NC024569 2      | 0,18456957 |
| Neophoca cinerea NC008419 3            | Lynx rufus NC014456 3                | 0,18456958 |
| Ursus arctos GU573491 207              | Meles anakuma NC009677 1             | 0,18457028 |
| Puma concolor NC016470 22              | Canis anthus NC027956 2              | 0,18457042 |
| Viverricula indica NC025296 2          | Melogale moschata NC020644 1         | 0,18457055 |
| Prionodon pardicolor NC024569 2        | Canis latrans NC008093 7             | 0,18457076 |

|                                      |                                      |            |
|--------------------------------------|--------------------------------------|------------|
| Viverricula indica XK891751 1        | Fossa fossana D350 1                 | 0,14328668 |
| Mungos mungo/gambianus SRR7704821 1  | Cryptoprocta ferox CF13 1            | 0,1432893  |
| Galerella sanguinea T378 1           | Eupleres goudotii D128 1             | 0,143291   |
| Salanoia concolor D378 1             | Civettictis civetta GLC19 1          | 0,14329141 |
| Viverra zibetha T609 1               | Felis silvestris lybica KP202275 4   | 0,14329307 |
| Zalophus californianus NC008416 1    | Pusa hispida NC 008433 1             | 0,14331394 |
| Puma concolor NC016470 22            | Hemigalus derbyanus MH464791 1       | 0,14331591 |
| Salanoia concolor D378 1             | Civettictis civetta NC033378 1       | 0,14332667 |
| Leopardus guigna NC028321 1          | Civettictis civetta NC033378 1       | 0,14332956 |
| Mirounga leonina NC008422 1          | Callorhinus ursinus NC008415 1       | 0,14332452 |
| Homotherium latidens MF871702 3      | Genetta genetta T297 1               | 0,1433488  |
| Viverricula indica XK891745 1        | Fossa fossana D350 1                 | 0,14335407 |
| Panthera uncia KP202269 1            | Nandinia binotata NC024567 1         | 0,14335856 |
| Nandinia binotata NC024567 1         | Felis chaus NC028307 1               | 0,14335868 |
| Viverricula indica XK891745 1        | Prionailurus planiceps NC028312 6    | 0,14336    |
| Genetta abyssinica MG489822 1        | Felis chaus NC028307 1               | 0,14336026 |
| Lynx canadensis NC028313 1           | Genetta servalina NC024568 2         | 0,1433603  |
| Genetta servalina NC024568 2         | Caracal caracal NC028306 1           | 0,14336154 |
| Prionodon pardicolor NC024569 2      | Leopardus wiedii NC028318 1          | 0,14337368 |
| Genetta abyssinica MG489822 1        | Cynogale bennetti KY117544 1         | 0,1433793  |
| Catopuma temminckii NC027115 41      | Arctictis binturong T605 2           | 0,14337988 |
| Pusa hispida NC 008433 1             | Eumetopias jubatus NC004030 10       | 0,14339508 |
| Otaria byronia OTAB 1                | Leptonychotes weddellii NC008424 1   | 0,14341682 |
| Viverra zibetha T609 1               | Pardofelis marmorata NLN3 2          | 0,14342773 |
| Viverricula indica XK891751 1        | Profelis aurata NC028299 1           | 0,14342777 |
| Viverricula indica XK891745 1        | Felis margarita NC028308 1           | 0,14342779 |
| Leopardus wiedii NC028318 1          | Genetta genetta T297 1               | 0,1434292  |
| Lobodon carcinophaga NC008423 1      | Arctocepalus pusillus NC008417 1     | 0,14342937 |
| Paradoxurus hermaphroditus NLNC 1    | Catopuma badia NC028300 1            | 0,14343436 |
| Urocyon cinereoargenteus NC026723 21 | Canis lupus familiaris NC002008 1231 | 0,14343607 |
| Prionailurus bengalensis CKM45 20    | Arctictis binturong T605 2           | 0,14344384 |
| Salanoia concolor D378 1             | Nandinia binotata NC024567 1         | 0,14348531 |
| Helogale parvula SRR7637809 1        | Galictis fasciata DM333 1            | 0,14348558 |
| Mungos mungo MMC7 1                  | Eupleres goudotii D128 1             | 0,14348562 |
| Mungotictis declininea NC027828 1    | Urva javanica T413 1                 | 0,14348608 |
| Genetta genetta T297 1               | Fossa fossana D350 1                 | 0,14349014 |
| Viverricula indica XK891751 1        | Leopardus tigrinus NC028317 1        | 0,14349343 |
| Prionailurus bengalensis NC028301 12 | Paradoxurus hermaphroditus NLNC 1    | 0,14349374 |
| Lynx pardinus NC028319 161           | Genetta genetta T297 1               | 0,1434963  |
| Panthera onca NC022842 1             | Nandinia binotata NC024567 1         | 0,14350189 |
| Vulpes corsac NC023958 1             | Cuon alpinus NC013445 3              | 0,14350547 |
| Vulpes vulpes NC008434 5             | Cuon alpinus NC013445 3              | 0,14350575 |
| Viverra tangelunga MH464792 1        | Galictis vittata T412 1              | 0,14351076 |
| Salanoia concolor D378 1             | Genetta abyssinica MG489822 1        | 0,14352354 |
| Phoca fasciata NC008428 1            | Eumetopias jubatus NC004030 10       | 0,14352648 |
| Hydrurga leptonyx NC008425 1         | Arctocepalus australis MG021319 1    | 0,14355886 |
| Leopardus wiedii NC028318 1          | Fossa fossana D350 1                 | 0,14356245 |
| Leopardus jacobita NC028322 1        | Civettictis civetta GLC19 1          | 0,14356329 |
| Melogale moschata KP726273 1         | Galictis vittata T412 1              | 0,14356592 |
| Lutrogale perspicillata NC035811 1   | Arctonyx collaris NC020645 1         | 0,14361493 |
| Paguma larvata PDD511 2              | Leopardus pardalis NC028315 1        | 0,14362757 |
| Viverricula indica XK891751 1        | Felis nigripes NC028309 1            | 0,14362913 |
| Leopardus tigrinus NC028317 1        | Civettictis civetta GLC19 1          | 0,14363045 |
| Leopardus guigna NC028321 1          | Civettictis civetta GLC19 1          | 0,14363407 |
| Viverra zibetha T609 1               | Leopardus guigna NC028321 1          | 0,14363441 |
| Genetta abyssinica MG489822 1        | Felis silvestris lybica KP202275 4   | 0,14364217 |
| Taxidea taxus NC020646 1             | Poecilogale albinucha T602 1         | 0,14364518 |
| Genetta abyssinica MG489822 1        | Felis margarita NC028308 1           | 0,14364547 |
| Monachus monachus NC004972 5         | Callorhinus ursinus NC008415 1       | 0,14364867 |
| Hemigalus derbyanus MH464791 1       | Felis nigripes NC028309 1            | 0,14367661 |
| Prionailurus rubiginosus NC028304 2  | Fossa fossana D350 1                 | 0,14369465 |
| Profelis aurata NC028299 1           | Nandinia binotata NC024567 1         | 0,14369518 |
| Prionailurus rubiginosus NC028304 2  | Paguma larvata PDD511 2              | 0,1436968  |
| Lynx lynx NC027083 4                 | Genetta servalina NC024568 2         | 0,1436969  |
| Hydrurga leptonyx NC008425 1         | Arctocepalus forsteri NC004023 28    | 0,14374806 |
| Prionailurus planiceps NC028312 6    | Hemigalus derbyanus MH464791 1       | 0,14375238 |
| Helogale parvula SRR7637809 1        | Eupleres goudotii D128 1             | 0,14375271 |
| Vulpes vulpes NC008434 5             | Chrysocyon brachyurus NC024172 1     | 0,14375703 |
| Parahyaena brunnea NC038159 15       | Fossa fossana D350 1                 | 0,14376573 |
| Felis margarita NC028308 1           | Arctictis binturong T605 2           | 0,14377691 |
| Prionodon pardicolor NC024569 2      | Leopardus jacobita NC028322 1        | 0,14377786 |
| Mustela nivalis T306 5               | Galictis vittata T412 1              | 0,1437858  |
| Leopardus guigna NC028321 1          | Genetta abyssinica MG489822 1        | 0,14378671 |
| Profelis aurata NC028299 1           | Civettictis civetta NC033378 1       | 0,14379783 |
| Vulpes corsac NC023958 1             | Lycalopex securus KT448284 1         | 0,14382173 |
| Mirounga leonina NC008422 1          | Arctocepalus pusillus NC008417 1     | 0,14382233 |
| Viverra zibetha T609 1               | Fossa fossana D350 1                 | 0,14382561 |
| Hemigalus derbyanus MH464791 1       | Felis margarita NC028308 1           | 0,14383145 |
| Leopardus pardalis NC028315 1        | Fossa fossana D350 1                 | 0,14383157 |
| Halichoerus grypus NC001602 2        | Callorhinus ursinus NC008415 1       | 0,14385632 |
| Homotherium latidens MF871702 3      | Chrotogale owstoni T607 1            | 0,14386177 |
| Phoca vitulina NC001325 1            | Callorhinus ursinus NC008415 1       | 0,14389476 |
| Panthera uncia NC010638 1            | Nandinia binotata NC024567 1         | 0,14389709 |
| Martes americana NC020642 1          | Galictis vittata T412 1              | 0,14390272 |
| Leptailurus serval NC028316 1        | Arctictis binturong T605 2           | 0,14391187 |
| Leopardus colocolo NC028314 1        | Fossa fossana D350 1                 | 0,14391445 |
| Viverricula indica NC025296 2        | Smilodon populator MF871700 1        | 0,14396206 |
| Viverra zibetha T609 1               | Leopardus tigrinus NC028317 1        | 0,14396594 |
| Viverra zibetha T609 1               | Felis nigripes NC028309 1            | 0,1439666  |
| Lynx rufus NC014456 3                | Genetta servalina NC024568 2         | 0,14396665 |
| Viverricula indica XK891745 1        | Leopardus guigna NC028321 1          | 0,14397095 |
| Viverricula indica XK891751 1        | Catopuma temminckii NC027115 41      | 0,14397104 |
| Vulpes zerda K1603240 1              | Cuon alpinus NC013445 3              | 0,14397703 |
| Pusa caspica NC008431 1              | Eumetopias jubatus NC004030 10       | 0,14399338 |
| Panthera leo NERO 19                 | Nandinia binotata NC024567 1         | 0,14399496 |
| Urocyon cinereoargenteus NC026723 21 | Canis anthus NC027956 2              | 0,1440113  |
| Vulpes lagopus NC026529 3            | Urocyon cinereoargenteus NC026723 21 | 0,1440113  |
| Mirounga leonina NC008422 1          | Arctocepalus forsteri KT693377 17    | 0,14401746 |
| Vulpes lagopus NC026529 3            | Lycalopex securus KT448284 1         | 0,14401762 |
| Nyctereutes procyonoides NC013700 3  | Lycalopex securus KT448284 1         | 0,1440179  |
| Nandinia binotata NC024567 1         | Urva semitorquata MH464789 1         | 0,144021   |
| Profelis aurata NC028299 1           | Hemigalus derbyanus MH464791 1       | 0,14402145 |
| Halichoerus grypus NC001602 2        | Eumetopias jubatus NC004030 10       | 0,14402184 |

|                                        |                                      |            |
|----------------------------------------|--------------------------------------|------------|
| Prionailurus bengalensis CKM45 20      | Arctocepalus gazella BK010918 1      | 0,1845722  |
| Lycalopex pictus NC028427 2            | Arctonyx collaris NC020645 1         | 0,18457289 |
| Prionailurus viverrinus NC028305 1     | Neophoca cinerea NC008419 1          | 0,18457311 |
| Panthera tigris amoyensis NC0014770 2  | Callorhinus ursinus NC008415 1       | 0,18457378 |
| Panthera onca NC022842 1               | Lutra lutra NC011358 9               | 0,18457399 |
| Procyon lotor AB462049 4               | Prionailurus viverrinus NC028305 1   | 0,1845745  |
| Otaria byronia OTAB 1                  | Leopardus pardalis T262 1            | 0,18457656 |
| Speothos venaticus C48 2               | Phoca vitulina NC001325 1            | 0,18457852 |
| Prionailurus bengalensis CKM45 20      | Arctotherium sp NC030174 1           | 0,18457896 |
| Ursus thibetanus thibetanus NC011111 1 | Crossarchus platycephalus C7R66 1    | 0,18457998 |
| Felis chaus NC028307 1                 | Bassariscus sumichrasti SRX1099089 1 | 0,18458004 |
| Paradoxurus jerdoni MH464793 1         | Ictonyx striatus T299 1              | 0,18458183 |
| Zalophus wollebaeki SRR4431565 1       | Lynx lynx NC027083 4                 | 0,18458231 |
| Melogale moschata NC020644 1           | Arctictis binturong T605 2           | 0,18458256 |
| Ursus spelaeus EU327344 13             | Arctocepalus australis MG023139 1    | 0,18458268 |
| Zalophus californianus NC008416 1      | Bassaricyon neblina SRX1097850 1     | 0,18458317 |
| Zalophus wollebaeki SRR4431565 1       | Felis silvestris lybica KP202275 4   | 0,18458362 |
| Zalophus wollebaeki SRR4431565 1       | Prionailurus planiceps NC028312 6    | 0,18458369 |
| Ursus thibetanus formosanus NC00993 1  | Puma concolor NC016470 22            | 0,18459097 |
| Ursus spelaeus NC011112 8              | Felis silvestris lybica KP202275 4   | 0,18459162 |
| Lutra lutra NC011358 9                 | Civettictis civetta NC033378 1       | 0,18459302 |
| Prionailurus planiceps KY682741 4      | Arctocepalus forsteri NC004023 28    | 0,18459862 |
| Viverricula indica XK891751 1          | Gulo gulo NC009685 3                 | 0,18459952 |
| Ursus thibetanus laniger MH281753 2    | Ictonyx striatus T299 1              | 0,18460065 |
| Lynx canadensis NC028313 1             | Lycalopex securus KT448284 1         | 0,1846008  |
| Smilodon populator MF871700 1          | Arctocepalus australis MG023139 1    | 0,18460242 |
| Felis chaus NC028307 1                 | Canis lupus familiaris NC002008 1231 | 0,18460336 |
| Phoca largha NC008430 1                | Cuon alpinus NC013445 3              | 0,18460783 |
| Ursus thibetanus laniger MH281753 2    | Canis aureus KT448274 1              | 0,18460897 |
| Lutra lutra NC011358 9                 | Urva semitorquata MH464789 1         | 0,18461406 |
| Speothos venaticus C48 2               | Halichoerus grypus NC001602 2        | 0,18461408 |
| Lutra lutra NC011358 9                 | Canis latrans NC008093 7             | 0,18461561 |
| Lutra lutra NC011358 9                 | Eupleres goudotii D128 1             | 0,18461753 |
| Melogale moschata KP726273 1           | Crossarchus platycephalus C7R66 1    | 0,18461765 |
| Mustela putorius NC020638 4            | Arctocepalus forsteri KT693377 17    | 0,18461874 |
| Zalophus californianus NC008416 1      | Leopardus colocolo NC028314 1        | 0,18461934 |
| Mustela kathiah NC023210 1             | Mungos mungo/gambianus SRR77048 1    | 0,18461992 |
| Melogale moschata V0735A 1             | Chrotogale owstoni T607 1            | 0,18462023 |
| Mustela kathiah NC023210 1             | Urva brachyura KY117547 1            | 0,18462104 |
| Mustela sibirica NC020637 6            | Urva javanica T413 1                 | 0,1846212  |
| Viverra tangelunga MH464792 1          | Xenogale naso C07XAR110 1            | 0,18462157 |
| Felis catus NC001700 2                 | Canis mesomelas KT448280 1           | 0,18462203 |
| Vulpes corsac NC023958 1               | Crossarchus platycephalus C7R66 1    | 0,18462253 |
| Paradoxurus hermaphroditus NLNC 1      | Callorhinus ursinus NC008415 1       | 0,18462257 |
| Meles meles T303 3                     | Galidia elegans D146 1               | 0,18462282 |
| Procyon lotor AB462046 3               | Arctocepalus forsteri KT693377 17    | 0,18462297 |
| Catopuma temminckii NC027115 41        | Canis mesomelas KT448280 1           | 0,18462315 |
| Phoca groenlandica NC008429 54         | Tapirus terrestris T358              | 0,18462369 |
| Spilogale putorius NC010497 1          | Arctictis binturong T605 2           | 0,18462451 |
| Tremarctos ornatus NC009969 2          | Mustela sibirica AP017394 11         | 0,18462466 |
| Lutrogale perspicillata NC035811 1     | Callorhinus ursinus NC008415 1       | 0,18462496 |
| Mungotictis declininea NC027828 1      | Aonyx cinerea NC0035814 2            | 0,18462513 |
| Phocartos hookeri NC008418 1           | Lutrogale perspicillata NC035811 1   | 0,18462521 |
| Lutra lutra LC050126 1                 | Genetta genetta T297 1               | 0,18462534 |
| Vulpes vulpes NC008434 5               | Viverra tangelunga MH464792 1        | 0,18462618 |
| Galictis fasciata DM333 1              | Arctocepalus pusillus NC008417 1     | 0,18462801 |
| Otaria byronia OTAB 1                  | Mungos mungo MMC7 1                  | 0,18462847 |
| Genetta servalina NC024568 2           | Arctocepalus australis MG023139 1    | 0,18462867 |
| Ursus arctos prinosus MG066703 3       | Eumetopias jubatus NC004030 10       | 0,1846302  |
| Hemigalus derbyanus MH464791 1         | Arctocepalus pusillus NC008417 1     | 0,18463089 |
| Mungotictis declininea NC027828 1      | Martes pennanti NC020664 6           | 0,18463093 |
| Phocartos hookeri NC008418 1           | Mustela nivalis T306 5               | 0,18463103 |
| Ursus maritimus GU573488 Svalbard      | Canis adustus GU7448271 1            | 0,18463105 |
| Viverricula indica XK891751 1          | Mustela eversmannii NC028013 1       | 0,18463163 |
| Cuon alpinus NC013445 3                | Acinonyx jubatus NC005212 3          | 0,18463245 |
| Ursus arctos GU573491 207              | Melogale moschata V0735A 1           | 0,18463278 |
| Potos flavus T414 1                    | Felis catus NC001700 2               | 0,1846337  |
| Ursus arctos EU497665 29               | Arctocepalus gazella BK010918 1      | 0,18463403 |
| Speothos venaticus C48 2               | Nandinia binotata NC024567 1         | 0,18463431 |
| Prionailurus planiceps NC028312 6      | Melogale moschata V0735A 1           | 0,18463437 |
| Vulpes lagopus NC026529 3              | Prionailurus viverrinus NC028305 1   | 0,18463503 |
| Profelis aurata NC028299 1             | Mustela erminea T305 2               | 0,18463594 |
| Leopardus guigna NC028321 1            | Ailuropus fulgens styani NC009691 1  | 0,18463625 |
| Viverricula indica NC025296 2          | Tremarctos ornatus NC009969 2        | 0,18463692 |
| Viverricula indica XK891745 1          | Arctocepalus pusillus NC008417 1     | 0,18463811 |
| Phocartos hookeri NC008418 1           | Leopardus tigrinus NC028317 1        | 0,18463875 |
| Neophoca cinerea NC008419 1            | Leopardus pardalis T262 1            | 0,18463902 |
| Otaria byronia OTAB 1                  | Lynx lynx NC027083 4                 | 0,1846396  |
| Poecilogale albinucha T602 1           | Lynx canadensis NC028313 1           | 0,18464085 |
| Prionodon pardicolor NC024569 2        | Mustela altaica NC021751 1           | 0,18464106 |
| Ursus arctos isabellinus 1885 2        | Otaria byronia OTAB 1                | 0,18464394 |
| Smilodon populator MF871700 1          | Neophoca cinerea NC008419 1          | 0,18464421 |
| Mustela erminea T305 2                 | Chrysocyon brachyurus NC024172 1     | 0,18464449 |
| Ursus maritimus NC003428 31            | Poecilogale albinucha T602 1         | 0,18464538 |
| Ursus arctos isabellinus 1885 2        | Poecilogale albinucha T602 1         | 0,18464558 |
| Lycalopex securus KT448284 1           | Ailuropus fulgens styani NC009691 1  | 0,18464607 |
| Lycalopex pictus NC028427 2            | Leopardus jacobita NC028322 1        | 0,18464866 |
| Chrotogale owstoni T607 1              | Canis aureus KT448274 1              | 0,1846493  |
| Ursus thibetanus mupinensis NC00875 1  | Prionailurus bengalensis NC028301 12 | 0,18464975 |
| Arctocepalus australis MG023139 1      | Acinonyx jubatus NC005212 3          | 0,18465066 |
| Odobenus rosmarus NC004029 29          | Arctotherium sp NC030174 1           | 0,18465124 |
| Zalophus wollebaeki SRR4431565 1       | Caracal caracal NC028306 1           | 0,18465129 |
| Melogale moschata V0735A 1             | Acinonyx jubatus NC005212 3          | 0,18465154 |
| Viverra tangelunga MH464792 1          | Ursus thibetanus laniger MH281753 2  | 0,18465196 |
| Mustela putorius NC020638 4            | Ailuropus melanoleuca NC009492 5     | 0,1846524  |
| Vulpes zerda K1603240 1                | Leopardus colocolo NC028314 1        | 0,18465483 |
| Tremarctos ornatus NC009969 2          | Odobenus rosmarus NC004029 29        | 0,18465541 |
| Ursus thibetanus formosanus NC00933 1  | Lynx rufus NC014456 3                | 0,1846564  |
| Mephitis mephitis NC020648 1           | Martes martes T302 3                 | 0,18465707 |
| Ursus thibetanus laniger MH281753 2    | Genetta genetta T297 1               | 0,18465725 |
| Poecilogale albinucha T602 1           | Acinonyx jubatus NC005212 3          | 0,18465772 |
| Ursus thibetanus formosanus NC00933 1  | Leopardus tigrinus NC028317 1        | 0,18465781 |
| Lynx lynx NC027083 4                   | Chrysocyon brachyurus NC024172 1     | 0,18465982 |

|                                          |                                          |            |
|------------------------------------------|------------------------------------------|------------|
| Urva brachyura KY117547 1                | Galidictis fasciata DM333 1              | 0,14402558 |
| Vulpes corsac NC023958 1                 | Chrysocyon brachyurus NC024172 1         | 0,14402673 |
| Prionailurus planiceps KY682741 4        | Genetta genetta T297 1                   | 0,14403594 |
| Leopardus geoffroyi NC028320 1           | Genetta servalina NC024568 2             | 0,14403825 |
| Urocyon littoralis catalinae KP129018 15 | Canis lupus familiaris NC002008 1231     | 0,14404221 |
| Eupleres goodotii D128 1                 | Bdeogale nigripes GLC15 1                | 0,14408854 |
| Galidia elegans D146 1                   | Atilax paludinosus T606 1                | 0,14409043 |
| Viverricula indica XK891751 1            | Felis catus NC001700 2                   | 0,14410082 |
| Viverricula indica XK891751 1            | Felis chaus NC028307 1                   | 0,14410108 |
| Viverricula indica NC025296 2            | Felis catus NC001700 2                   | 0,1441043  |
| Paradoxurus jerdoni MH464793 1           | Homotherium latidens MF871702 3          | 0,14410508 |
| Zalophus californianus NC008416 1        | Erigonathus barbatus NC008426 1          | 0,14410993 |
| Leopardus tigrinus NC028317 1            | Civettictis civetta NC033378 1           | 0,14413436 |
| Urocyon littoralis catalinae KP129018 15 | Canis anthus NC027956 2                  | 0,14414597 |
| Mungos mungo/gambianus SRR770482 1       | Galidia elegans D146 1                   | 0,14415851 |
| Prionailurus bengalensis NC028301 12     | Fossa fossana D350 1                     | 0,14416611 |
| Prionailurus planiceps KY682741 4        | Paguma larvata PDD511 2                  | 0,14416794 |
| Paguma larvata PDD511 2                  | Otocolobus manul NC028323 1              | 0,14416867 |
| Leopardus pardalis NC028315 1            | Genetta genetta T297 1                   | 0,14416958 |
| Meles leucurus NC039173 4                | Galictis vittata T412 1                  | 0,14417131 |
| Viverricula indica NC025296 2            | Felis margarita NC028308 1               | 0,14417189 |
| Paguma larvata PDD511 2                  | Acinonyx jubatus NC005212 3              | 0,14417949 |
| Prionodon pardicolor NC024569 2          | Leopardus geoffroyi NC028320 1           | 0,14418179 |
| Martes pennanti NC020664 16              | Galictis vittata T412 1                  | 0,14418246 |
| Prionodon pardicolor NC024569 2          | Leopardus colocolo NC028314 1            | 0,14419755 |
| Profelis aurata NC028299 1               | Genetta abyssinica MG489822 1            | 0,14419869 |
| Lobodon carcinophaga NC008423 1          | Arctocepalus forsteri NC004023 28        | 0,14421088 |
| Lynx rufus NC014456 3                    | Fossa fossana D350 1                     | 0,14423311 |
| Paguma larvata PDD511 2                  | Leopardus wiedii NC028318 1              | 0,14423393 |
| Prionailurus planiceps NC028312 6        | Paguma larvata PDD511 2                  | 0,14423518 |
| Mustela altaica NC021751 1               | Meles anakuma NC009677 1                 | 0,14423583 |
| Viverra zibetha T609 1                   | Felis margarita NC028308 1               | 0,14423592 |
| Genetta servalina NC024568 2             | Felis catus NC001700 2                   | 0,1442364  |
| Urocyon cinereoargenteus NC026723 21     | Canis lupus chanco NC010340 4            | 0,14423761 |
| Leopardus guigna NC028321 1              | Genetta servalina NC024568 2             | 0,14424005 |
| Smilodon populator MF871700 1            | Hemigalus derbyanus MH464791 1           | 0,14426425 |
| Vulpes lagopus NC026529 3                | Urocyon littoralis catalinae KP129018 15 | 0,14428061 |
| Meles meles T303 3                       | Lutrologale perspicillata NC035811 1     | 0,14428809 |
| Lobodon carcinophaga NC008423 1          | Arctocepalus gazella BK010918 1          | 0,14429949 |
| Hyena hyaena NC020669 1                  | Fossa fossana D350 1                     | 0,14430372 |
| Lynx canadensis NC028313 1               | Genetta genetta T297 1                   | 0,14430419 |
| Viverricula indica NC025296 2            | Lynx pardinus NC028319 161               | 0,14430653 |
| Zalophus wolbeaeki SRR4431565 1          | Pusa hispida NC 008433 1                 | 0,14431332 |
| Prionailurus planiceps KY682741 4        | Hemigalus derbyanus MH464791 1           | 0,14431819 |
| Leopardus jacobita NC028322 1            | Civettictis civetta NC033378 1           | 0,14433666 |
| Mirounga leonina NC008422 1              | Arctocepalus gazella BK010918 1          | 0,14435446 |
| Zalophus wolbeaeki SRR4431565 1          | Erigonathus barbatus NC008426 1          | 0,14436781 |
| Mungos mungo MIMC7 1                     | Genetta abyssinica MG489822 1            | 0,14439161 |
| Hemigalus derbyanus MH464791 1           | Felis silvestris lybica KP202275 4       | 0,14440638 |
| Leptonychotes weddellii NC008424 1       | Arctocepalus forsteri NC004023 28        | 0,14441129 |
| Vulpes ferrilata NC027935 1              | Lycalopex secureus KT448284 1            | 0,14442685 |
| Salanoia concolor D378 1                 | Urva brachyura KY117547 1                | 0,14442918 |
| Phoca largha NC008430 1                  | Callorhinus ursinus NC008415 1           | 0,14443353 |
| Hydrurga leptonyx NC008425 1             | Arctocepalus townsendi NC008420 1        | 0,14443387 |
| Viverricula indica XK891751 1            | Prionailurus planiceps NC028312 6        | 0,14443691 |
| Viverricula indica XK891751 1            | Felis silvestris lybica KP202275 4       | 0,14443716 |
| Urocyon cinereoargenteus NC026723 21     | Canis aureus KT448274 1                  | 0,14443775 |
| Pardofelis marmorata NLN3 2              | Genetta servalina NC024568 2             | 0,14443852 |
| Lynx rufus NC014456 3                    | Genetta genetta T297 1                   | 0,14443922 |
| Prionailurus rubiginosus NC028304 2      | Arctictis binturong T605 2               | 0,14445071 |
| Mirounga angustirostris SRR10331586 1    | Eumetopias jubatus NC004030 10           | 0,14446919 |
| Lynx rufus NC014456 3                    | Hemigalus derbyanus MH464791 1           | 0,14447008 |
| Viverricula indica NC025296 2            | Prionailurus planiceps KY682741 4        | 0,14450833 |
| Prionailurus viverrinus NC028305 1       | Arctictis binturong T605 2               | 0,14451677 |
| Puma concolor NC016470 22                | Arctictis binturong T605 2               | 0,1445179  |
| Vulpes vulpes NC008434 5                 | Urocyon cinereoargenteus NC026723 21     | 0,14454992 |
| Viverricula indica XK891751 1            | Homotherium latidens MF871702 3          | 0,14456677 |
| Lobodon carcinophaga NC008423 1          | Arctocepalus australis MG023139 1        | 0,14456847 |
| Panthera onca KP202264 2                 | Civettictis civetta GLC19 1              | 0,14457355 |
| Urocyon littoralis catalinae KP129018 15 | Canis lupus chanco NC010340 4            | 0,14457425 |
| Otocolobus manul NC028323 1              | Genetta genetta T297 1                   | 0,14457476 |
| Viverricula indica NC025296 2            | Prionailurus planiceps NC028312 6        | 0,14457567 |
| Genetta genetta T297 1                   | Catopuma badia NC028300 1                | 0,14457674 |
| Prionodon pardicolor NC024569 2          | Leptailurus serval NC028316 1            | 0,14458272 |
| Felis chaus NC028307 1                   | Arctictis binturong T605 2               | 0,14458512 |
| Pardofelis marmorata NLN3 2              | Civettictis civetta NC033378 1           | 0,14460325 |
| Urva brachyura KY117547 1                | Hemigalus derbyanus MH464791 1           | 0,14460854 |
| Vulpes zerda KJ603240 1                  | Lyaon pictus NC028427 2                  | 0,14462306 |
| Urva javanica T413 1                     | Galidictis fasciata DM333 1              | 0,14463136 |
| Lynx canadensis NC028313 1               | Civettictis civetta GLC19 1              | 0,14463963 |
| Pardofelis marmorata NLN3 2              | Civettictis civetta GLC19 1              | 0,14464039 |
| Viverricula indica NC025296 2            | Lynx canadensis NC028313 1               | 0,14464302 |
| Salanoia concolor D378 1                 | Leopardus jacobita NC028322 1            | 0,14464507 |
| Viverricula indica XK891745 1            | Homotherium latidens MF871702 3          | 0,14466055 |
| Pusa sibirica NC008432 2                 | Eumetopias jubatus NC004030 10           | 0,14466701 |
| Urva semitorquata MH464789 1             | Galidia elegans D146 1                   | 0,14466938 |
| Mungotictis decemlineata NC027828 1      | Civettictis civetta GLC19 1              | 0,14470515 |
| Viverricula indica XK891745 1            | Lynx lynx NC027083 4                     | 0,14470607 |
| Viverra zibetha T609 1                   | Lynx canadensis NC028313 1               | 0,14470622 |
| Viverricula indica XK891751 1            | Caracal caracal NC028306 1               | 0,14470693 |
| Leopardus tigrinus NC028317 1            | Genetta servalina NC024568 2             | 0,14470728 |
| Monachus schauinslandi NC008421 1        | Arctocepalus pusillus NC008417 1         | 0,14470908 |
| Taxidea taxus NC020646 1                 | Lontra canadensis SRR10409165 1          | 0,14471093 |
| Vulpes lagopus NC026529 3                | Cuon alpinus NC013445 3                  | 0,14471334 |
| Lynx lynx NC027083 4                     | Hemigalus derbyanus MH464791 1           | 0,14474517 |
| Paradoxurus hermaphroditus NC039591 1    | Leptailurus serval NC028316 1            | 0,14477314 |
| Vulpes vulpes NC008434 5                 | Urocyon littoralis catalinae KP129018 15 | 0,14481923 |
| Lynx pardinus NC028319 161               | Fossa fossana D350 1                     | 0,14483899 |
| Panthera onca KP202264 2                 | Nandinia binotata NC024567 1             | 0,14483993 |
| Viverricula indica XK891751 1            | Prionailurus planiceps KY682741 4        | 0,14484096 |
| Panthera leo NERO 19                     | Civettictis civetta NC033378 1           | 0,14484195 |
| Otaria byronia OTAB 1                    | Hydrurga leptonyx NC008425 1             | 0,14484303 |
| Zalophus californianus NC008416 1        | Pusa caspica NC008431 1                  | 0,14485417 |

|                                      |                                      |            |
|--------------------------------------|--------------------------------------|------------|
| Ursus thibetanus thibetanus NC011118 | Leopardus jacobita NC028322 1        | 0,18465991 |
| Canis mesomelas KT448280 1           | Arctonyx collaris NC020645 1         | 0,18466166 |
| Ursus americanus JX196366 3          | Melogale moschata V0735A 1           | 0,18466672 |
| Ictonyx striatus T299 1              | Arctocepalus forsteri NC004023 28    | 0,18466896 |
| Salanoia concolor D378 1             | Eumetopias jubatus NC004030 10       | 0,18467097 |
| Martes flavigula NC012141 3          | Chrysocyon brachyurus NC024172 1     | 0,18467224 |
| Smilodon populator MF871700 1        | Mustela eversmanni NC028013 1        | 0,18467723 |
| Mephitis mephitis NC020648 1         | Genetta abyssinica MG489822 1        | 0,18467356 |
| Paradoxurus jerdoni MH464793 1       | Eumetopias jubatus NC004030 10       | 0,18467483 |
| Gulo gulo NC009685 3                 | Catopuma temminckii NC027115 41      | 0,18467724 |
| Prionailurus bengalensis CKM45 20    | Canis mesomelas KT448280 1           | 0,18468358 |
| Meles meles T303 3                   | Hemigalus parvulus SRR7637809 1      | 0,18468522 |
| Puma yagouaroundi NC028311 1         | Cuon alpinus NC013445 3              | 0,18468538 |
| Ursus thibetanus thibetanus NC011118 | Canis lupus familiaris NC002008 1231 | 0,18468565 |
| Martes zibellina NC011579 39         | Urva semitorquata MH464789 1         | 0,18468659 |
| Mustela putorius NC020638 4          | Urva javanica T413 1                 | 0,18468715 |
| Martes zibellina NC011579 39         | Urva javanica T413 1                 | 0,18468732 |
| Mustela putorius NC020638 4          | Xenogale naso C07XAR110 1            | 0,18468833 |
| Phocarcotus hookeri NC008418 1       | Mustela nigripes NC020492 1          | 0,18468888 |
| Procyon lotor AB462046 3             | Arctocepalus australis MG023139 1    | 0,18469058 |
| Salanoia concolor D378 1             | Callorhinus ursinus NC008415 1       | 0,18469131 |
| Martes martes T302 3                 | Urva javanica T413 1                 | 0,18469185 |
| Martes martes T302 3                 | Atilax paludinosus T606 1            | 0,18469276 |
| Viverra tangalunga MH464792 1        | Salanoia concolor D378 1             | 0,18469322 |
| Mustela eversmanni NC028013 1        | Canis anthus NC027956 2              | 0,18469395 |
| Martes zibellina NC011579 39         | Galarella sanguinea T378 1           | 0,18469627 |
| Urva brachyura KY117547 1            | Bassariscus sumichrasti SRX109089 1  | 0,18469667 |
| Paradoxurus hermaphroditus NLNC 1    | Melogale moschata KP726273 1         | 0,18469681 |
| Mustela altaica NC021751 1           | Arctocepalus forsteri KT693377 17    | 0,18469696 |
| Mustela nivalis T306 5               | Mungos mungo/gambianus SRR77048      | 0,18469732 |
| Ursus arctos AP012576 6              | Gulo gulo NC009685 3                 | 0,18469818 |
| Ursus arctos isabellinus 1885 2      | Arctocepalus townsendi NC008420 1    | 0,18469895 |
| Ursus arctos isabellinus 1885 2      | Martes pennanti NC020664 16          | 0,18469998 |
| Paradoxurus hermaphroditus NC039591  | Mustela eversmanni NC028013 1        | 0,18470016 |
| Profelis aurata NC028299 1           | Ailurus fulgens NC011124 1           | 0,18470021 |
| Pardofelis marmorata NLN3 2          | Mustela sibirica NC020637 6          | 0,18470021 |
| Paradoxurus hermaphroditus NC039591  | Mustela sibirica AP017394 11         | 0,18470033 |
| Lycalopex secureus KT448284 1        | Arctodus simus NC011116 1            | 0,18470043 |
| Viverricula indica XK891751 1        | Tremarctos ornatus NC009969 2        | 0,18470202 |
| Genetta genetta T297 1               | Ailurus fulgens NC011124 1           | 0,18470214 |
| Vulpes ferrilata NC027935 1          | Felis chaus NC028307 1               | 0,18470226 |
| Neophoca cinerea NC008419 1          | Civettictis civetta GLC19 1          | 0,18470255 |
| Melogale moschata V0735A 1           | Catopuma temminckii NC027115 41      | 0,18470278 |
| Fossa fossana D350 1                 | Canis aureus KT448274 1              | 0,18470374 |
| Leopardus pardalis T262 1            | Canis anthus NC027956 2              | 0,18470392 |
| Ursus arctos pruinosus MG066703 3    | Callorhinus ursinus NC008415 1       | 0,18470411 |
| Vulpes zerda KJ603240 1              | Leopardus tigrinus NC028317 1        | 0,18470411 |
| Lontra canadensis SRR10409165 1      | Leopardus geoffroyi NC028320 1       | 0,18470521 |
| Prionailurus bengalensis NC028301 12 | Phocarcotus hookeri NC008418 1       | 0,18470567 |
| Ursus arctos GU573486 5              | Martes pennanti NC020664 16          | 0,18470639 |
| Procyon lotor AB462046 3             | Paradoxurus jerdoni MH464793 1       | 0,18470782 |
| Ichneumia albicauda T603 1           | Arctotherium sp NC030174 1           | 0,18471029 |
| Otaria byronia OTAB 1                | Leopardus tigrinus NC028317 1        | 0,18471171 |
| Pardofelis marmorata NLN3 2          | Neowison vison NC020641 3            | 0,18471199 |
| Melogale moschata V0735A 1           | Homotherium latidens MF871702 3      | 0,18471213 |
| Ursus americanus JX196366 3          | Canis adustus KT448271 1             | 0,18471366 |
| Ursus thibetanus laniger MH281753 2  | Mungotictis decemlineata NC027828 1  | 0,1847143  |
| Mustela sibirica NC020637 6          | Arctictis binturong T605 2           | 0,1847145  |
| Prionodon pardicolor NC024569 2      | Martes foyna NC020643 1              | 0,18471561 |
| Speothos venaticus C48 2             | Puma yagouaroundi NC028311 1         | 0,18471648 |
| Mustela altaica NC021751 1           | Arctictis binturong T605 2           | 0,18471652 |
| Taxidea taxus NC020646 1             | Hyaena hyaena NC020669 1             | 0,18471658 |
| Mephitis mephitis NC020648 1         | Martes americana NC020642 1          | 0,18471667 |
| Urva javanica T413 1                 | Canis lupus chanco NC010340 4        | 0,18471794 |
| Ursus spelaeus EU327344 13           | Lynx lynx NC027083 4                 | 0,18472105 |
| Ursus spelaeus EU327344 13           | Leopardus wiedii NC028318 1          | 0,18472141 |
| Ursus spelaeus EU327344 13           | Caracal caracal NC028306 1           | 0,18472314 |
| Meles leucurus NC039173 4            | Canis lupus familiaris NC002008 1231 | 0,18472353 |
| Ursus spelaeus NC011118 8            | Lynx pardinus NC028319 161           | 0,18472625 |
| Procyon lotor AB462049 4             | Genetta abyssinica MG489822 1        | 0,18472679 |
| Ursus arctos AP012576 6              | Poecillogale albinucha T602 1        | 0,18472724 |
| Leopardus colocolo NC028314 1        | Arctocepalus pusillus NC008417 1     | 0,18472861 |
| Vulpes lagopus NC026529 3            | Hemigalus derbyanus MH464791 1       | 0,18472911 |
| Ursus thibetanus thibetanus NC011118 | Lyaon pictus NC028427 2              | 0,1847304  |
| Leopardus guigna NC028321 1          | Canis aureus KT448274 1              | 0,18473119 |
| Lyaon pictus NC028427 2              | Arctictis binturong T605 2           | 0,18473236 |
| Zalophus californianus NC008416 1    | Ursus arctos pruinosus MG066703 3    | 0,18473265 |
| Zalophus californianus NC008416 1    | Catopuma temminckii NC027115 41      | 0,18473357 |
| Ictonyx striatus T299 1              | Acinonyx jubatus NC005212 3          | 0,18473448 |
| Prionailurus planiceps NC028312 6    | Arctocepalus forsteri NC004023 28    | 0,1847349  |
| Spilogale putorius NC010497 1        | Melogale moschata NC020644 1         | 0,18473583 |
| Lynx rufus NC014456 3                | Canis lupus familiaris NC002008 1231 | 0,18473674 |
| Civettictis civetta GLC19 1          | Canis mesomelas KT448280 1           | 0,18474174 |
| Zalophus californianus NC008416 1    | Hemigalus derbyanus MH464791 1       | 0,18474601 |
| Smilodon populator MF871700 1        | Martes pennanti NC020664 16          | 0,18474773 |
| Puma yagouaroundi NC028311 1         | Eumetopias jubatus NC004030 10       | 0,18474795 |
| Mungos mungo/gambianus SRR77048      | Martes melampus NC009678 1           | 0,1847485  |
| Martes melampus NC009678 1           | Cynictis penicillata T375 1          | 0,18475115 |
| Viverricula indica XK891751 1        | Lutra lutra NC011358 9               | 0,18475308 |
| Mustela sibirica NC020637 6          | Mungos mungo MIMC7 1                 | 0,18475381 |
| Mustela nigripes NC024942 1          | Mungos mungo/gambianus SRR77048      | 0,18475462 |
| Neophoca cinerea NC008419 1          | Crossarchus platycephalus C7R66 1    | 0,18475577 |
| Prionodon linsang ERR2391707 4       | Meles leucurus NC039173 4            | 0,18475579 |
| Meles leucurus NC039173 4            | Galidictis fasciata DM333 1          | 0,18475732 |
| Gulo gulo NC009685 3                 | Acinonyx jubatus NC005212 3          | 0,18475801 |
| Salanoia concolor D378 1             | Meles anakuma NC009677 1             | 0,18475842 |
| Eupleres goodotii D128 1             | Arctocepalus pusillus NC008417 1     | 0,18475884 |
| Leopardus jacobita NC028322 1        | Conepatus chinga NC024596 1          | 0,18475926 |
| Vulpes corsac NC023958 1             | Mungotictis decemlineata NC027828 1  | 0,18476011 |
| Panthera onca KP202264 2             | Meles leucurus NC039173 4            | 0,18476288 |
| Pardofelis marmorata NLN3 2          | Meles leucurus NC039173 4            | 0,1847629  |
| Civettictis civetta GLC19 1          | Arctocepalus forsteri KT693377 17    | 0,18476437 |
| Meles leucurus NC039173 4            | Ichneumia albicauda T603 1           | 0,18476543 |



|                                          |                                       |            |
|------------------------------------------|---------------------------------------|------------|
| Viverricula indica XK891751 1            | Smilodon populator MF871700 1         | 0,14485513 |
| Poecilogale albinucha T602 1             | Galectis vittata T412 1               | 0,1448562  |
| Taxidea taxus NC020646 1                 | Aonyx cinerea NC035814 2              | 0,1448563  |
| Nandinia binotata NC024567 1             | Hemigalus derbyanus MH464791 1        | 0,14486863 |
| Hemigalus derbyanus MH464791 1           | Felis catus NC001700 2                | 0,14488131 |
| Phocarcctos hookeri NC008418 1           | Leptonyctotes weddellii NC008424 1    | 0,14489262 |
| Leptonyctotes weddellii NC008424 1       | Arctocepalus townsendi NC008420 1     | 0,14489335 |
| Paguma larvata PDD511 2                  | Nandinia binotata NC024567 1          | 0,14490277 |
| Cryptoprocta ferox CFC13 1               | Attilax paludinosus T606 1            | 0,14490487 |
| Lutrogale perspicillata NC035811 1       | Galectis vittata T412 1               | 0,14491133 |
| Zalophus californianus NC008416 1        | Mirounga angustirostris SRR10331586 1 | 0,14492962 |
| Mungotictis decemlineata NC027828 1      | Civettictis civetta NC033378 1        | 0,14494228 |
| Ursa brachyura KY117547 1                | Eupleres goudotii D128 1              | 0,14496379 |
| Xenogale naso C07XAR110 1                | Galidia elegans D146 1                | 0,14496599 |
| Vulpes lagopus NC026529 3                | Chrysoyon brachyurus NC024172 1       | 0,14496891 |
| Prionailurus viverrinus NC028305 1       | Hemigalus derbyanus MH464791 1        | 0,14497469 |
| Viverricula indica XK891745 1            | Lynx pardinus NC028319 161            | 0,14497574 |
| Prionailurus bengalensis CKM45 20        | Fossa fossana D350 1                  | 0,1449776  |
| Otaria byronia OTAB 1                    | Lobodon carinophaga NC008423 1        | 0,14497906 |
| Felis silvestris lybica KP202275 4       | Arctictis binturong T605 2            | 0,14498901 |
| Otocolobus manul NC028323 1              | Arctictis binturong T605 2            | 0,14498961 |
| Phoca groenlandica NC008429 54           | Eumetopias jubatus NC004030 10        | 0,14499016 |
| Prionailurus bengalensis CKM45 20        | Diplogale hoesi MH464790 1            | 0,14501067 |
| Felis silvestris lybica KP202275 4       | Chrotogale owstoni T607 1             | 0,14503402 |
| Salanoia concolor D378 1                 | Ursa javanica T413 1                  | 0,14503498 |
| Urocyon littoralis catalinae KP129018 15 | Canis aureus KT448274 1               | 0,145045   |
| Puma concolor NC016470 22                | Genetta genetta T297 1                | 0,14504558 |
| Viverricula indica XK891751 1            | Leopardus guigna NC028321 1           | 0,14504841 |
| Zalophus wolfebaeki SRR4431565 1         | Mirounga angustirostris SRR10331586 1 | 0,14505184 |
| Genetta genetta T297 1                   | Acinonyx jubatus NC005212 3           | 0,14505844 |
| Leopardus colocolo NC028314 1            | Arctictis binturong T605 2            | 0,14507246 |
| Vulpes corsac NC023958 1                 | Lycyon pictus NC028427 2              | 0,14510004 |
| Poecilogale albinucha T602 1             | Lontra canadensis SRR10409165 1       | 0,14510882 |
| Viverricula indica XK891751 1            | Puma concolor NC016470 22             | 0,14511004 |
| Viverra zibetha T609 1                   | Felis catus NC001700 2                | 0,14511108 |
| Leopardus pardalis T262 1                | Genetta genetta T297 1                | 0,14511238 |
| Prionodon pardicolor NC024569 2          | Leopardus tigrinus NC028317 1         | 0,14511961 |
| Caracal caracal NC028306 1               | Arctictis binturong T605 2            | 0,14512402 |
| Genetta abyssinica MG489822 1            | Catopuma temminckii NC027115 41       | 0,14513697 |
| Prionailurus rubiginosus NC028304 2      | Chrotogale owstoni T607 1             | 0,14516659 |
| Viverricula indica XK891751 1            | Felis catus NC001700 2                | 0,14517777 |
| Viverricula indica NC025296 2            | Lynx lynx NC027083 4                  | 0,14518183 |
| Genetta abyssinica MG489822 1            | Galidictis fasciata DM333 1           | 0,1452069  |
| Mirounga leonina NC008422 1              | Arctocepalus australis MG023139 1     | 0,14522928 |
| Vulpes vulpes NC008434 5                 | Speothos venaticus C48 2              | 0,14522965 |
| Leptailurus serval NC028316 1            | Chrotogale owstoni T607 1             | 0,14523394 |
| Helogale parvula SRR7637809 1            | Galidia elegans D146 1                | 0,1452354  |
| Helogale parvula SRR7637809 1            | Cryptoprocta ferox CFC13 1            | 0,14524172 |
| Leopardus pardalis T262 1                | Crossarchus platycephalus C7R66 1     | 0,14524616 |
| Smilodon populator MF871700 1            | Paguma larvata PDD511 2               | 0,14524819 |
| Paguma larvata PDD511 2                  | Catopuma temminckii NC027115 41       | 0,1452515  |
| Vulpes ferrilata NC027935 1              | Cuon alpinus NC013445 3               | 0,14525643 |
| Leopardus colocolo NC028314 1            | Genetta genetta T297 1                | 0,14526361 |
| Neophoca cinerea NC008419 1              | Leptonyctotes weddellii NC008424 1    | 0,14529774 |
| Lynx pardinus NC028319 161               | Hemigalus derbyanus MH464791 1        | 0,14529835 |
| Prionailurus bengalensis NC028301 12     | Paradoxurus hermaphroditus NC039591 1 | 0,14531149 |
| Genetta servalina NC024568 2             | Catopuma temminckii NC027115 41       | 0,14531739 |
| Panthera tigris amoyensis NC014770 2     | Nandinia binotata NC024567 1          | 0,14531846 |
| Zalophus californianus NC008416 1        | Pusa sibirica NC008432 2              | 0,14532101 |
| Viverra zibetha T609 1                   | Panthera onca NC022842 1              | 0,14532128 |
| Leopardus pardalis T262 1                | Arctictis binturong T605 2            | 0,14532425 |
| Profelis aurata NC028299 1               | Arctictis binturong T605 2            | 0,14532608 |
| Zalophus californianus NC008416 1        | Phoca fasciata NC008428 1             | 0,145329   |
| Zalophus californianus NC008416 1        | Phoca groenlandica NC008429 54        | 0,14533128 |
| Eumetopias jubatus NC004030 10           | Cystophora cristata NC008427 1        | 0,14533387 |
| Hemigalus derbyanus MH464791 1           | Felis chaus NC028307 1                | 0,14535107 |
| Panthera uncia KP202269 1                | Civettictis civetta NC033378 1        | 0,14535172 |
| Panthera onca KP202264 2                 | Civettictis civetta NC033378 1        | 0,14535187 |
| Lynx canadensis NC028313 1               | Hemigalus derbyanus MH464791 1        | 0,14535764 |
| Suricata suricatta SSM10 1               | Eupleres goudotii D128 1              | 0,14536817 |
| Felis margarita NC028308 1               | Chrotogale owstoni T607 1             | 0,14537059 |
| Suricata suricatta SSM10 1               | Galidictis fasciata DM333 1           | 0,14537123 |
| Vulpes zerda KJ603240 1                  | Chrysoyon brachyurus NC024172 1       | 0,14537141 |
| Paradoxurus hermaphroditus NLNC 1        | Leopardus wiedii NC028318 1           | 0,145377   |
| Neophoca cinerea NC008419 1              | Lobodon carinophaga NC008423 1        | 0,14537775 |
| Viverricula indica XK891751 1            | Felis margarita NC028308 1            | 0,14538009 |
| Viverra zibetha T609 1                   | Homotherium latidens MF871702 3       | 0,14538069 |
| Panthera onca NC022842 1                 | Civettictis civetta GLC19 1           | 0,14538911 |
| Lynx canadensis NC028313 1               | Civettictis civetta NC033378 1        | 0,14541876 |
| Phoca fasciata NC008428 1                | Arctocepalus gazella BK010918 1       | 0,14544053 |
| Paguma larvata PDD511 2                  | Lynx pardinus NC028319 161            | 0,14544697 |
| Viverricula indica XK891745 1            | Pardofelis marmorata NLN3 2           | 0,14544748 |
| Leopardus wiedii NC028318 1              | Crossarchus platycephalus C7R66 1     | 0,14544815 |
| Genetta genetta T297 1                   | Felis nigripes NC028309 1             | 0,14545026 |
| Prionodon pardicolor NC024569 2          | Leopardus guigna NC028321 1           | 0,14546144 |
| Paradoxurus hermaphroditus NLNC 1        | Leopardus colocolo NC028314 1         | 0,14546224 |
| Viverra zibetha T609 1                   | Panthera leo NERO 19                  | 0,14547808 |
| Panthera leo NERO 19                     | Civettictis civetta GLC19 1           | 0,14547834 |
| Mirounga leonina NC008422 1              | Arctocepalus townsendi NC008420 1     | 0,14549774 |
| Meles leucurus NC039173 4                | Lutrogale perspicillata NC035811 1    | 0,1454992  |
| Galidia elegans D146 1                   | Bdeogale nigripes GLC15 1             | 0,14550515 |
| Poecilogale albinucha T602 1             | Lutrogale perspicillata NC035811 1    | 0,1455116  |
| Lynx lynx NC027083 4                     | Genetta genetta T297 1                | 0,14551622 |
| Melogale moschata V0735A 1               | Galidictis vittata T412 1             | 0,14551763 |
| Zalophus wolfebaeki SRR4431565 1         | Phoca groenlandica NC008429 54        | 0,1455214  |
| Diplogale hoesi MH464790 1               | Acinonyx jubatus NC005212 3           | 0,14552206 |
| Lynx pardinus NC028319 161               | Arctictis binturong T605 2            | 0,14552785 |
| Smilodon populator MF871700 1            | Fossa fossana D350 1                  | 0,14554466 |
| Zalophus californianus NC008416 1        | Monachus monachus NC044972 5          | 0,1455531  |
| Erignathus barbatus NC008426 1           | Arctocepalus gazella BK010918 1       | 0,14556825 |
| Lontra canadensis SRR10409165 1          | Arctonyx collaris NC020645 1          | 0,14556834 |
| Zalophus californianus NC008416 1        | Halichoerus grypus NC001602 2         | 0,1455687  |
| Prionailurus planiceps KY682741 4        | Fossa fossana D350 1                  | 0,14558005 |

|                                      |                                      |            |
|--------------------------------------|--------------------------------------|------------|
| Vulpes ferrilata NC027935 1          | Phoca groenlandica NC008429 54       | 0,18476564 |
| Martes zibellina NC011579 39         | Ichneumia albicauda T603 1           | 0,18476641 |
| Martes foina NC020643 1              | Ursa javanica T413 1                 | 0,18476836 |
| Prionailurus rubiginosus NC028304 2  | Arctocepalus forsteri KT693377 17    | 0,1847688  |
| Cynogale bennetti KY117544 1         | Bassariscus sumichrasti SRR1099089 1 | 0,18476933 |
| Vulpes ferrilata NC027935 1          | Leopardus wiedii NC028318 1          | 0,18476962 |
| Speothos venaticus C48 2             | Mustela frenata NC020640 1           | 0,18476996 |
| Phocarcctos hookeri NC008418 1       | Lynx lynx NC027083 4                 | 0,18477069 |
| Leopardus pardalis NC028315 1        | Canis anthus NC027956 2              | 0,18477076 |
| Prionodon pardicolor NC024569 2      | Martes martes T302 3                 | 0,18477137 |
| Prionailurus planiceps KY682741 4    | Lontra canadensis SRR10409165 1      | 0,18477157 |
| Prionailurus planiceps NC028312 6    | Canis anthus NC027956 2              | 0,18477227 |
| Ursus thibetanus mupinensis NC00879  | Chrotogale owstoni T607 1            | 0,18477266 |
| Leopardus geoffroyi NC028320 1       | Arctocepalus gazella BK010918 1      | 0,18477276 |
| Prionailurus planiceps NC028312 6    | Canis latrans NC008093 7             | 0,18477277 |
| Profelis aurata NC028299 1           | Canis anthus NC027956 2              | 0,18477298 |
| Panthera tigris amoyensis NC014770 2 | Meles meles T303 3                   | 0,18477331 |
| Felis chaus NC028307 1               | Canis latrans NC008093 7             | 0,1847735  |
| Phocarcctos hookeri NC008418 1       | Leopardus geoffroyi NC028320 1       | 0,18477395 |
| Martes pennanti NC020664 16          | Ichneumia albicauda T603 1           | 0,18477444 |
| Ursus arctos GU573491 207            | Mustela itatsi NC034330 19           | 0,18477461 |
| Zalophus wolfebaeki SRR4431565 1     | Ursa semitorquata MH464789 1         | 0,18477537 |
| Ursus arctos GU573491 207            | Aonyx cinerea NC035814 2             | 0,18477552 |
| Procyon lotor AB462049 4             | Caracal caracal NC028306 1           | 0,18477565 |
| Ursus lotor isabellinus 18B5 2       | Bassariscus sumichrasti SRR1099089 1 | 0,18477571 |
| Procyon lotor AB462046 3             | Leopardus tigrinus NC028317 1        | 0,18477593 |
| Paradoxurus hermaphroditus NC03959   | Lycalopex sechurae KT448284 1        | 0,18477611 |
| Ursus thibetanus formosanus NC0093   | Lutra lutra NC011358 9               | 0,18477646 |
| Procyon lotor AB462046 3             | Leopardus jacobita NC028322 1        | 0,18477683 |
| Martes pennanti NC020664 16          | Helarctos malayanus NC009968 2       | 0,18477774 |
| Ursus maritimus NC003428 31          | Otaria byronia OTAB 1                | 0,18477805 |
| Otocyon megalotis SAF1 2             | Lynx canadensis NC028313 1           | 0,18477872 |
| Taxidea taxus NC020646 1             | Cryptoprocta ferox CFC13 1           | 0,18478246 |
| Speothos venaticus C48 2             | Monachus schauinslandi NC008421 1    | 0,18478259 |
| Meles leucurus NC039173 4            | Ailuropoda melanoleuca NC009492 5    | 0,18478346 |
| Martes eversmannii NC028013 1        | Melurus ursinus NC009970 2           | 0,18478511 |
| Ursus thibetanus formosanus NC0093   | Aonyx cinerea NC035814 2             | 0,18478581 |
| Martes pennanti NC020664 16          | Arctictis binturong T605 2           | 0,18478604 |
| Prionodon pardicolor NC024569 2      | Lycyon pictus NC028427 2             | 0,18478608 |
| Viverricula indica NC025296 2        | Ictonyx striatus T299 1              | 0,1847866  |
| Zalophus californianus NC008416 1    | Bdeogale nigripes GLC15 1            | 0,18478814 |
| Zalophus californianus NC008416 1    | Ursa semitorquata MH464789 1         | 0,18478855 |
| Ursus spelaeus EU327344 13           | Leopardus pardalis T262 1            | 0,18478879 |
| Profelis aurata NC028299 1           | Lycyon pictus NC028427 2             | 0,184789   |
| Ursus spelaeus EU327344 13           | Leopardus pardalis NC028315 1        | 0,18478902 |
| Mephitis mephitis NC020648 1         | Martes pennanti NC020664 16          | 0,18478964 |
| Ursus thibetanus formosanus NC0093   | Felis silvestris lybica KP202275 4   | 0,18479216 |
| Lynx lynx NC027083 4                 | Galidictis vittata T412 1            | 0,18479261 |
| Martes americana NC020642 1          | Canis lupus chanco NC010340 4        | 0,18480036 |
| Lutra sumatrana NC035810 1           | Civettictis civetta NC033378 1       | 0,18480089 |
| Martes foina NC020643 1              | Canis lupus familiaris NC002008 1231 | 0,18480395 |
| Martes flavivulva NC012141 3         | Arctictis binturong T605 2           | 0,18480635 |
| Zalophus californianus NC008416 1    | Galidictis vittata T412 1            | 0,18480822 |
| Lycyon pictus NC028427 2             | Gulo gulo NC009685 3                 | 0,18480875 |
| Tremarctos ornatus NC009969 2        | Civettictis civetta NC033378 1       | 0,18480924 |
| Prionodon pardicolor NC024569 2      | Gulo gulo NC009685 3                 | 0,18480933 |
| Ursus thibetanus formosanus NC0093   | Canis aureus KT448274 1              | 0,18481119 |
| Genetta genetta T297 1               | Canis lupus chanco NC010340 4        | 0,18481244 |
| Vulpes ferrilata NC027935 1          | Halichoerus grypus NC001602 2        | 0,18481302 |
| Leptailurus serval NC028316 1        | Cuon alpinus NC013445 3              | 0,18481453 |
| Prionodon pardicolor NC024569 2      | Lycalopex sechurae KT448284 1        | 0,18481472 |
| Prionailurus planiceps NC028312 6    | Eumetopias jubatus NC004030 10       | 0,18481481 |
| Mungos mungo MMC7 1                  | Lutra lutra NC011358 9               | 0,1848149  |
| Ursus americanus JX196366 3          | Mustela nivalis T306 5               | 0,18481548 |
| Lutra lutra NC011358 9               | Attilax paludinosus T606 1           | 0,18481693 |
| Phocarcctos hookeri NC008418 1       | Enhydra lutris NC009692 1            | 0,18481885 |
| Mustela eversmannii NC028013 1       | Chrotogale owstoni T607 1            | 0,18481933 |
| Mungos mungo/gambianus SRR77048      | Tapirus terrestris T358              | 0,18481997 |
| Martes zibellina NC011579 39         | Attilax paludinosus T606 1           | 0,18482149 |
| Mustela itatsi NC034330 19           | Mungos mungo MMC7 1                  | 0,18482201 |
| Mustela sibirica AP017394 11         | Ursa brachyura KY117547 1            | 0,18482251 |
| Mustela nigripes NC024942 1          | Xenogale naso C07XAR110 1            | 0,18482333 |
| Mungotictis decemlineata NC027828    | Melogale moschata V0735A 1           | 0,18482438 |
| Smilodon populator MF871700 1        | Arctocepalus forsteri NC004023 28    | 0,1848283  |
| Mungos mungo/gambianus SRR77048      | Bassariscus sumichrasti SRR1099089 1 | 0,18482891 |
| Martes martes T302 3                 | Chrotogale owstoni T607 1            | 0,18482935 |
| Pardofelis marmorata NLN3 2          | Lutra lutra NC011358 9               | 0,18483111 |
| Viverricula indica XK891745 1        | Martes zibellina NC011579 39         | 0,1848318  |
| Otocyon megalotis SAF1 2             | Crossarchus platycephalus C7R66 1    | 0,18483211 |
| Panthera uncia NC010638 1            | Mirounga leonina NC008422 1          | 0,18483213 |
| Nasua nasua NC020647 1               | Ictonyx striatus T299 1              | 0,18483216 |
| Pusa sibirica NC008432 2             | Paradoxurus hermaphroditus NC03959   | 0,18483232 |
| Ursus thibetanus thibetanus NC01111  | Canis lupus chanco NC010340 4        | 0,18483256 |
| Viverra zibetha T609 1               | Tremarctos ornatus NC009969 2        | 0,18483384 |
| Mustela kathiah NC023210 1           | Galerella sanguinea T378 1           | 0,1848343  |
| Suricata suricatta SSM10 1           | Arctodus simus NC011116 1            | 0,18483479 |
| Martes martes T302 3                 | Canis anthus NC027956 2              | 0,18483497 |
| Parahyaena brunnea NC038159 15       | Enhydra lutris NC009692 1            | 0,18483518 |
| Mustela sibirica NC020637 6          | Ichneumia albicauda T603 1           | 0,18483575 |
| Mustela sibirica AP017394 11         | Felis chaus NC028307 1               | 0,18483645 |
| Lontra canadensis SRR10409165 1      | Arctotherium sp NC030174 1           | 0,18483646 |
| Vulpes lagopus NC026529 3            | Felis catus NC001700 2               | 0,18483655 |
| Viverra tangalunga MH464792 1        | Ichneumia albicauda T603 1           | 0,18483664 |
| Viverricula indica XK891751 1        | Melogale moschata NC020644 1         | 0,18483686 |
| Canis aureus KT448274 1              | Arctonyx collaris NC020645 1         | 0,18483689 |
| Puma yagouaroundi NC028311 1         | Melogale moschata V0735A 1           | 0,18483737 |
| Melogale moschata V0735A 1           | Felis chaus NC028307 1               | 0,18483779 |
| Zalophus californianus NC008416 1    | Civettictis civetta NC033378 1       | 0,18483901 |
| Tremarctos ornatus NC009969 2        | Catopuma badia NC028300 1            | 0,18483903 |
| Vulpes zerda KJ603240 1              | Phoca lagha NC008430 1               | 0,18483914 |
| Mustela altaica NC021751 1           | Galidictis fasciata DM333 1          | 0,18483944 |
| Prionailurus viverrinus NC028305 1   | Canis latrans NC008093 7             | 0,18483952 |
| Prionailurus planiceps KY682741 4    | Neophoca cinerea NC008419 1          | 0,1848399  |

|                                          |                                       |            |
|------------------------------------------|---------------------------------------|------------|
| Pusa hispida NC 008433 1                 | Arctocepalus gazella BK010918 1       | 0,14558049 |
| Zalophus wolbeaeki SRR4431565 1          | Phoca fasciata NC008428 1             | 0,14558671 |
| Viverricula indica NC025296 2            | Panthera onca NC022842 1              | 0,14559415 |
| Genetta abyssinica MG489822 1            | Felis catus NC001700 2                | 0,14562331 |
| Panthera onca NC022842 1                 | Civettictis civetta NC033378 1        | 0,14562543 |
| Neophoca cinerea NC008419 1              | Erignathus barbatus NC008426 1        | 0,14563526 |
| Monachus schauinslandi NC008421 1        | Arctocepalus gazella BK010918 1       | 0,14564575 |
| Prionailurus bengalensis NC028301 12     | Paradoxurus jerdoni MH464793 1        | 0,14564845 |
| Chrotogale owstoni T607 1                | Acinonyx jubatus NC005212 3           | 0,14564922 |
| Prionailurus viverrinus NC028305 1       | Fossa fossana D350 1                  | 0,14565606 |
| Profelis aurata NC028299 1               | Genetta servalina NC024568 2          | 0,14565116 |
| Genetta genetta T297 1                   | Felis margarita NC028308 1            | 0,14565191 |
| Mungotictis decemlineata NC027828 1      | Lynx rufus NC014456 3                 | 0,14565192 |
| Salanoia concolor D378 1                 | Prionailurus rubiginosus NC028304 2   | 0,14565362 |
| Salanoia concolor D378 1                 | Leopardus pardalis T262 1             | 0,14565593 |
| Zalophus wolbeaeki SRR4431565 1          | Monachus schauinslandi NC008421 1     | 0,14565732 |
| Puma yagouaroundi NC028311 1             | Arctictis binturong T605 2            | 0,14566284 |
| Paguma larvata PDD511 2                  | Homotherium latidens MF871702 3       | 0,14566858 |
| Urocyon cinereoargenteus NC026723 21     | Nyctereutes procyonoides NC013700 3   | 0,14569448 |
| Urocyon littoralis catalinae KP129018 15 | Nyctereutes procyonoides NC013700 3   | 0,14569448 |
| Prionailurus bengalensis NC028301 12     | Chrotogale owstoni T607 1             | 0,14570451 |
| Urocyon cinereoargenteus NC026723 21     | Otocyon megalotis SAF1 2              | 0,14570458 |
| Erignathus barbatus NC008426 1           | Arctocepalus pusillus NC008417 1      | 0,14570771 |
| Prionodon linsang ERR2391707 1           | Paguma larvata PDD511 2               | 0,14571044 |
| Fossa fossana D350 1                     | Catopuma badia NC028300 1             | 0,14571244 |
| Neophoca cinerea NC008419 1              | Hydrurga leptonyx NC008425 1          | 0,14571366 |
| Lynx lynx NC027083 4                     | Fossa fossana D350 1                  | 0,14571441 |
| Prionailurus viverrinus NC028305 1       | Paguma larvata PDD511 2               | 0,14571629 |
| Zalophus wolbeaeki SRR4431565 1          | Pusa caspica NC008431 1               | 0,14571884 |
| Leopardus pardalis T262 1                | Eupleres goudotii D128 1              | 0,14572006 |
| Puma concolor NC016470 22                | Prionodon pardicolor NC024569 2       | 0,1457267  |
| Nandinia binotata NC024567 1             | Homotherium latidens MF871702 3       | 0,14575015 |
| Phoca largha NC008430 1                  | Eumetopias jubatus NC004030 10        | 0,14575771 |
| Erignathus barbatus NC008426 1           | Arctocepalus townsendi NC008420 1     | 0,14576897 |
| Viverricula indica XK891745 1            | Lynx canadensis NC028313 1            | 0,14578351 |
| Viverricula indica XK891745 1            | Lynx rufus NC014456 3                 | 0,14578371 |
| Leopardus colocolo NC028314 1            | Chrotogale owstoni T607 1             | 0,14578809 |
| Prionodon pardicolor NC024569 2          | Prionailurus rubiginosus NC028304 2   | 0,14579414 |
| Zalophus californianus NC008416 1        | Cystophora cristata NC008427 1        | 0,14579636 |
| Uruva javanica/eurpunctata NC006835 1    | Genetta servalina NC024568 2          | 0,14580975 |
| Urocyon littoralis catalinae KP129018 15 | Otocyon megalotis SAF1 2              | 0,14583924 |
| Vulpes vulpes NC008434 5                 | Lyacon pictus NC028427 2              | 0,14584059 |
| Otocyon megalotis SAF1 2                 | Lyacon pictus NC028427 2              | 0,14584135 |
| Galidia elegans D146 1                   | Galerella sanguinea T378 1            | 0,14584158 |
| Mungos mungo MMC7 1                      | Galidia elegans D146 1                | 0,14584433 |
| Viverricula indica XK891751 1            | Prionodon linsang ERR2391707 1        | 0,14584546 |
| Phocartos hookeri NC008418 1             | Hydrurga leptonyx NC008425 1          | 0,14584802 |
| Pusa hispida NC 008433 1                 | Neophoca cinerea NC008419 1           | 0,14584851 |
| Leopardus pardalis NC028315 1            | Crossarchus platycephalus C7R66 1     | 0,14585188 |
| Salanoia concolor D378 1                 | Prionailurus bengalensis NC028301 12  | 0,14585604 |
| Leopardus pardalis NC028315 1            | Arctictis binturong T605 2            | 0,14586291 |
| Prionodon pardicolor NC024569 2          | Acinonyx jubatus NC005212 3           | 0,14587334 |
| Prionailurus bengalensis NC028301 12     | Diplogale hosei MH464790 1            | 0,14589873 |
| Nandinia binotata NC024567 1             | Xenogale naso C07XAR110 1             | 0,14590267 |
| Nasua nasua NC020647 1                   | Bassariscus neblina SRX1097850 1      | 0,14591631 |
| Mungotictis decemlineata NC027828 1      | Catopuma badia NC028300 1             | 0,14591983 |
| Viverricula indica NC025296 2            | Pardofelis marmorata NLN3 2           | 0,14592259 |
| Salanoia concolor D378 1                 | Leopardus wiedii NC028318 1           | 0,14592519 |
| Prionailurus planiceps NC028312 6        | Arctictis binturong T605 2            | 0,14593196 |
| Zalophus californianus NC008416 1        | Monachus schauinslandi NC008421 1     | 0,14593881 |
| Mirounga leonina NC008422 1              | Arctocepalus forsteri NC004023 28     | 0,14595531 |
| Genetta abyssinica MG489822 1            | Crossarchus platycephalus C7R66 1     | 0,14595619 |
| Phoca vitulina NC001325 1                | Eumetopias jubatus NC004030 10        | 0,14595763 |
| Xenogale naso C07XAR110 1                | Cryptoprocta ferox CFC13 1            | 0,14598207 |
| Cryptoprocta ferox CFC13 1               | Bdeogale nigripes GLC15 1             | 0,14598235 |
| Prionailurus rubiginosus NC028304 2      | Crossarchus platycephalus C7R66 1     | 0,14598449 |
| Panthera pardus japonensis KJ866876 8    | Nandinia binotata NC024567 1          | 0,14598487 |
| Salanoia concolor D378 1                 | Catopuma badia NC028300 1             | 0,14598714 |
| Genetta genetta T297 1                   | Caracal caracal NC028306 1            | 0,14598903 |
| Mungotictis decemlineata NC027828 1      | Leopardus jacobita NC028322 1         | 0,14599133 |
| Lynx pardinus NC028319 161               | Cryptoprocta ferox CFC13 1            | 0,14599334 |
| Felis catus NC001700 2                   | Arctictis binturong T605 2            | 0,14599897 |
| Prionailurus planiceps KY682741 4        | Arctictis binturong T605 2            | 0,14599925 |
| Zalophus wolbeaeki SRR4431565 1          | Monachus monachus NC044972 5          | 0,14601305 |
| Mungotictis decemlineata NC027828 1      | Genetta abyssinica MG489822 1         | 0,1460361  |
| Meles meles T303 3                       | Lontra canadensis SRR10409165 1       | 0,14603944 |
| Puma yagouaroundi NC028311 1             | Chrotogale owstoni T607 1             | 0,14604063 |
| Spilogale putorius NC010497 1            | Conepatus chinga NC042596 1           | 0,14604205 |
| Viverra zibetha T609 1                   | Nandinia binotata NC024567 1          | 0,14604792 |
| Lobodon carcinophaga NC008423 1          | Arctocepalus townsendi NC008420 1     | 0,14604945 |
| Genetta genetta T297 1                   | Felis silvestris lybica KP202275 4    | 0,14605559 |
| Viverricula indica NC025296 2            | Lynx rufus NC014456 3                 | 0,14605726 |
| Prionodon pardicolor NC024569 2          | Prionailurus planiceps KY682741 4     | 0,14606321 |
| Hemigalus derbyanus MH464791 1           | Catopuma temminckii NC027115 41       | 0,1460682  |
| Panthera pardus NC010641 5               | Nandinia binotata NC024567 1          | 0,14607827 |
| Suricata suricatta SSM10 1               | Salanoia concolor D378 1              | 0,14611141 |
| Phoca fasciata NC008428 1                | Arctocepalus pusillus NC008417 1      | 0,14611794 |
| Pardofelis marmorata NLN3 2              | Genetta abyssinica MG489822 1         | 0,14611822 |
| Prionailurus planiceps NC028312 6        | Fossa fossana D350 1                  | 0,1461187  |
| Fossa fossana D350 1                     | Caracal caracal NC028306 1            | 0,14611898 |
| Panthera uncia KP202269 1                | Civettictis civetta GLC19 1           | 0,14612234 |
| Meles meles T303 3                       | Galictis vittata T412 1               | 0,14612359 |
| Salanoia concolor D378 1                 | Leopardus pardalis NC028315 1         | 0,14612705 |
| Nandinia binotata NC024567 1             | Arctictis binturong T605 2            | 0,14612938 |
| Panthera leo spelaea KX258452 2          | Civettictis civetta NC033378 1        | 0,1461571  |
| Nandinia binotata NC024567 1             | Cynictis penicillata T375 1           | 0,14617559 |
| Suricata suricatta SSM10 1               | Mungotictis decemlineata NC027828 1   | 0,1461786  |
| Mirounga angustirostris SRR10331586 1    | Callorhinus ursinus NC008415 1        | 0,14618157 |
| Prionodon linsang ERR2391707 1           | Paradoxurus hermaphroditus NC039591 1 | 0,14618184 |
| Zalophus wolbeaeki SRR4431565 1          | Pusa sibirica NC008432 1              | 0,14618574 |
| Leptailurus serval NC028316 1            | Fossa fossana D350 1                  | 0,14618638 |
| Salanoia concolor D378 1                 | Lynx lynx NC027083 4                  | 0,1461902  |
| Salanoia concolor D378 1                 | Lynx canadensis NC028313 1            | 0,14619069 |

|                                      |                                      |            |
|--------------------------------------|--------------------------------------|------------|
| Prionailurus planiceps NC028312 6    | Nyctereutes procyonoides NC013700 3  | 0,18484008 |
| Viverricula indica NC025296 2        | Martes pennanti NC020664 16          | 0,18484031 |
| Canis latrans NC008093 7             | Arctodus simus NC011116 1            | 0,18484117 |
| Panthera onca KP202264 2             | Aonyx cinerea NC035814 2             | 0,18484168 |
| Viverra tangalunga MH464792 1        | Ursus maritimus GU573488 Svalbard    | 0,18484189 |
| Ursus arctos pruinosus MG066703 3    | Martes martes T302 3                 | 0,18484227 |
| Leopardus guigna NC028321 1          | Canis latrans NC008093 7             | 0,184843   |
| Otaria byronia OTAB 1                | Lynx rufus NC014456 3                | 0,18484308 |
| Phoca groenlandica NC008429 54       | Panthera uncia NC010638 1            | 0,1848436  |
| Mephitis mephitis NC020648 1         | Melogale moschata KP726273 1         | 0,18484381 |
| Otaria byronia OTAB 1                | Ictonyx striatus T299 1              | 0,18484443 |
| Viverricula indica XK891751 1        | Martes foina NC020643 1              | 0,18484447 |
| Profelis aurata NC028299 1           | Arctotherium sp NC030174 1           | 0,18484497 |
| Mustela altaica NC021751 1           | Ichneumia albicauda T603 1           | 0,18484581 |
| Viverra tangalunga MH464792 1        | Panthera onca NC022842 1             | 0,18484662 |
| Ursus arctos GU573491 207            | Mustela nivalis T306 5               | 0,18484668 |
| Otaria byronia OTAB 1                | Leopardus geoffroyi NC028320 1       | 0,18484733 |
| Procyon lotor AB462049 4             | Leopardus colocolo NC028314 1        | 0,18484762 |
| Viverra tangalunga MH464792 1        | Ursus arctos GU573486 5              | 0,18484822 |
| Otocolobus manul NC028323 1          | Otaria byronia OTAB 1                | 0,18484873 |
| Ursus arctos AP012576 6              | Martes pennanti NC020664 16          | 0,18485048 |
| Ursus arctos AP012576 6              | Martes martes NC011579 39            | 0,18485071 |
| Meles meles T303 3                   | Ailuropoda melanoleuca NC009492 5    | 0,18485099 |
| Ursus arctos GU573486 5              | Otaria byronia OTAB 1                | 0,18485151 |
| Ursus thibetanus thibetanus NC011118 | Mungotictis decemlineata NC027828 1  | 0,18485159 |
| Paguma larvata PDD511 2              | Lyacon pictus NC028427 2             | 0,18485251 |
| Paguma larvata PDD511 2              | Canis mesomelas KT448280 1           | 0,18485554 |
| Ursus spelaeus EU327344 13           | Prionailurus bengalensis NC028301 12 | 0,18485765 |
| Ursus thibetanus formosanus NC0093   | Prionailurus planiceps KY682741 4    | 0,18485951 |
| Ursus thibetanus thibetanus NC011118 | Felis catus NC001700 2               | 0,18486083 |
| Leopardus pardalis NC028315 1        | Herpoceros malayanus NC009968 2      | 0,18486106 |
| Ursus thibetanus thibetanus NC011118 | Prionailurus planiceps KY682741 4    | 0,18486223 |
| Melursus ursinus NC009970 2          | Leopardus pardalis NC028315 1        | 0,18486241 |
| Mustela altaica NC021751 1           | Arctocepalus forsteri NC004023 28    | 0,18486436 |
| Martes flavigula NC012141 3          | Cynictis penicillata T375 1          | 0,18486547 |
| Genetta abyssinica MG489822 1        | Arctotherium sp NC030174 1           | 0,18486556 |
| Zalophus californianus NC008416 1    | Paradoxurus jerdoni MH464793 1       | 0,18486875 |
| Ursus americanus JX196366 3          | Mustela sibirica NC020637 6          | 0,18487534 |
| Prionodon pardicolor NC024569 2      | Martes flavigula NC012141 3          | 0,18487597 |
| Lynx rufus NC014456 3                | Canis lupus chanco NC010340 4        | 0,18487817 |
| Leopardus geoffroyi NC028320 1       | Canis mesomelas KT448280 1           | 0,18487985 |
| Procyon lotor AB462049 4             | Civettictis civetta NC003677 1       | 0,18488082 |
| Phocartos hookeri NC008418 1         | Meles anakuma NC009777 1             | 0,18488774 |
| Mustela kathiah NC023210 1           | Eupleres goudotii D128 1             | 0,18488812 |
| Mustela eversmanni NC028013 1        | Mungos mungo MMC7 1                  | 0,18488836 |
| Xenogale naso C07XAR110 1            | Arctonyx colaris NC020645 1          | 0,18488947 |
| Potos flavus T414 1                  | Canis aureus KT448274 1              | 0,18489002 |
| Phocartos hookeri NC008418 1         | Mustela sibirica NC020637 6          | 0,18489014 |
| Martes americana NC020642 1          | Canis latrans NC008093 7             | 0,18489149 |
| Ursus spelaeus NC011112 8            | Spilogale putorius NC010497 1        | 0,18489237 |
| Tremarctos ornatus NC009969 2        | Mustela sibirica NC020637 6          | 0,18489408 |
| Helogale parvula SRR7637809 1        | Bassariscus sumichrasti SRX1099089 1 | 0,18489517 |
| Otaria byronia OTAB 1                | Mungos mungo/gambianus SRR77048      | 0,18489638 |
| Viverra tangalunga MH464792 1        | Canis anthus NC027956 2              | 0,18489729 |
| Viverricula indica XK891745 1        | Martes americana NC020642 1          | 0,18489829 |
| Viverricula indica NC025296 2        | Callorhinus ursinus NC008415 1       | 0,18489856 |
| Prionailurus bengalensis CKM45 20    | Conepatus chinga NC042596 1          | 0,18489955 |
| Diplogale hosei MH464790 1           | Arctodus simus NC011116 1            | 0,1848996  |
| Panthera onca KP202264 2             | Lutra lutra LC050126 1               | 0,18489987 |
| Felis margarita NC028308 1           | Callorhinus ursinus NC008415 1       | 0,18490005 |
| Lutra sumatrana NC035810 1           | Genetta genetta T297 1               | 0,18490031 |
| Puma concolor NC016470 22            | Callorhinus ursinus NC008415 1       | 0,18490046 |
| Vulpes lagopus NC026529 3            | Martes martes T302 3                 | 0,18490149 |
| Ursus maritimus NC003428 31          | Arctocepalus australis MG023139 1    | 0,18490186 |
| Melogale moschata V0735A 1           | Genetta genetta T297 1               | 0,18490197 |
| Ursus maritimus NC003428 31          | Canis adustus KT448271 1             | 0,18490236 |
| Viverricula indica NC025296 2        | Martes americana NC020642 1          | 0,18490256 |
| Mustela putorius NC020638 4          | Felis nigripes NC028309 1            | 0,18490277 |
| Ictonyx striatus T299 1              | Arctocepalus australis MG023139 1    | 0,18490279 |
| Mungos mungo/gambianus SRR77048      | Ictonyx striatus T299 1              | 0,18490297 |
| Martes foina NC020643 1              | Bdeogale nigripes GLC15 1            | 0,18490306 |
| Viverricula indica NC025296 2        | Martes zibellina NC011579 39         | 0,18490316 |
| Martes foina NC020643 1              | Cynictis penicillata T375 1          | 0,18490322 |
| Phocartos hookeri NC008418 1         | Canis adustus KT448271 1             | 0,18490399 |
| Ursus arctos GU573486 5              | Canis aureus KT448271 1              | 0,18490507 |
| Leopardus tigrinus NC028317 1        | Arctocepalus forsteri KT693377 17    | 0,1849056  |
| Leopardus geoffroyi NC028320 1       | Ailuropus fulgens NC011124 1         | 0,18490584 |
| Vulpes lagopus NC026529 3            | Catopuma temminckii NC027115 41      | 0,18490671 |
| Nyctereutes procyonoides NC013700 3  | Felis nigripes NC028309 1            | 0,18490687 |
| Nyctereutes procyonoides NC013700 3  | Felis silvestris lybica KP202275 4   | 0,18490708 |
| Vulpes ferrilata NC027935 1          | Prionailurus bengalensis CKM45 20    | 0,18490836 |
| Paradoxurus jerdoni MH464793 1       | Arctocepalus pusillus NC008417 1     | 0,18490925 |
| Prionodon pardicolor NC024569 2      | Melogale moschata NC020644 1         | 0,18490931 |
| Ursus maritimus GU573488 Svalbard    | Bassariscus sumichrasti SRX1099089 1 | 0,18490994 |
| Poecilogale albinucha T602 1         | Lynx rufus NC014456 3                | 0,18490998 |
| Leopardus geoffroyi NC028320 1       | Canis anthus NC027956 2              | 0,1849101  |
| Poecilogale albinucha T602 1         | Felis chaus NC028307 1               | 0,18491028 |
| Poecilogale albinucha T602 1         | Felis margarita NC028308 1           | 0,18491054 |
| Martes pennanti NC020664 16          | Leopardus tigrinus NC028317 1        | 0,18491146 |
| Ursus thibetanus laniger MH281753 2  | Lutra lutra NC011358 9               | 0,18491149 |
| Ursus arctos isabellinus 18B5 2      | Mustela altaica NC021751 1           | 0,18491155 |
| Puma yagouaroundi NC028311 1         | Poecilogale albinucha T602 1         | 0,18491165 |
| Viverricula indica NC025296 2        | Arctocepalus pusillus NC008417 1     | 0,18491188 |
| Mustela altaica NC021751 1           | Lyacon pictus NC028427 2             | 0,18491374 |
| Mustela nivalis T306 5               | Felis chaus NC028307 1               | 0,18491381 |
| Ursus spelaeus NC011112 8            | Lutra lutra LC050126 1               | 0,18491443 |
| Prionailurus bengalensis CKM45 20    | Lutrogale perspicillata NC035811 1   | 0,18491448 |
| Leopardus colocolo NC028314 1        | Conepatus chinga NC042596 1          | 0,18491578 |
| Ursus thibetanus formosanus NC0093   | Mungotictis decemlineata NC027828 1  | 0,18491657 |
| Smilodon populator MF871700 1        | Martes americana NC020642 1          | 0,1849169  |
| Ursus arctos GU573486 5              | Mustela altaica NC021751 1           | 0,18491846 |
| Otocolobus manul NC028323 1          | Ictonyx striatus T299 1              | 0,18491974 |
| Lutra lutra LC050126 1               | Canis lupus familiaris NC002008 1231 | 0,18492028 |

|                                       |                                       |            |
|---------------------------------------|---------------------------------------|------------|
| Prionailurus rubiginosus NC028304 2   | Mungotictis decemlineata NC027828 1   | 0,14619209 |
| Leopardus wiedii NC028318 1           | Arctictis binturong T605 2            | 0,14619979 |
| Galidictis fasciata DM333 1           | Civettictis civetta NC033378 1        | 0,14622369 |
| Vulpes corsac NC023958 1              | Speothos venaticus C48 2              | 0,14623991 |
| Speothos venaticus C48 2              | Nyctereutes procyonoides NC013700 3   | 0,14624061 |
| Pusa sibirica NC008432 2              | Neophoca cinerea NC008419 1           | 0,14624238 |
| Lynx canadensis NC028313 1            | Fossa fossana D350 1                  | 0,14625289 |
| Galidictis fasciata DM333 1           | Civettictis civetta GLC19 1           | 0,14625446 |
| Viverricula indica NK891751 1         | Lynx pardinus NC028319 161            | 0,1462547  |
| Paguma larvata PDD511 2               | Lynx rufus NC014456 3                 | 0,14625499 |
| Pusa hispida NC 008433 1              | Otaria byronia OTAB 1                 | 0,1462553  |
| Leopardus pardalis T262 1             | Galidictis fasciata DM333 1           | 0,14626247 |
| Zalophus californianus NC008416 1     | Phoca largha NC008430 1               | 0,14627492 |
| Homotherium latidens MF871702 3       | Arctictis binturong T605 2            | 0,14628518 |
| Hemigalus derbyanus MH464791 1        | Cynictis penicillata T375 1           | 0,14629336 |
| Mungotictis decemlineata NC027828 1   | Ursa brachyura KY117547 1             | 0,14631434 |
| Viverricula indica NC025296 2         | Panthera onca KP202264 2              | 0,14632687 |
| Zalophus californianus NC008416 1     | Phoca vitulina NC001325 1             | 0,14634247 |
| Otaria byronia OTAB 1                 | Halichoerus grypus NC001602 2         | 0,14635183 |
| Panthera uncia NC010638 1             | Civettictis civetta NC033378 1        | 0,14636201 |
| Zalophus wollebakei SRR4431565 1      | Halichoerus grypus NC001602 2         | 0,14636606 |
| Meles anakuma NC009677 1              | Lutrogale perspicillata NC035811 1    | 0,14637418 |
| Nandinia binotata NC024567 1          | Atlix paludinosus T606 1              | 0,14637759 |
| Nandinia binotata NC024567 1          | Eupleres goudotii D128 1              | 0,14637816 |
| Prionodon linsang ERR2391707 1        | Paradoxurus hermaphroditus NLNC 1     | 0,1463837  |
| Cynictis penicillata T375 1           | Cryptoprocta ferox FC13 1             | 0,14638621 |
| Mungos mungo MMC7 1                   | Cryptoprocta ferox FC13 1             | 0,14638977 |
| Puma yagouaroundi NC028311 1          | Paguma larvata PDD511 2               | 0,14639044 |
| Zalophus wollebakei SRR4431565 1      | Cystophora cristata NC008427 1        | 0,14639112 |
| Puma yagouaroundi NC028311 1          | Prionodon pardicolor NC024569 2       | 0,1464045  |
| Ommatophoca rossii AY377287etc 1      | Eumetopias jubatus NC004030 10        | 0,14642513 |
| Vulpes zerda KJ603240 1               | Speothos venaticus C48 2              | 0,14644141 |
| Smilodon populator MF871700 1         | Chrotogale owstoni T607 1             | 0,14644431 |
| Vulpes ferriata NC027935 1            | Lyaon pictus NC028427 2               | 0,14644693 |
| Felis catus NC001700 2                | Chrotogale owstoni T607 1             | 0,14644824 |
| Viverricula indica NK891745 1         | Mungos mungo MMC7 1                   | 0,14645158 |
| Prionailurus planiceps NC028312 6     | Paradoxurus hermaphroditus NLNC 1     | 0,14645632 |
| Lontra canadensis SRR10409165 1       | Galictis vittata T412 1               | 0,14645985 |
| Mungotictis decemlineata NC027828 1   | Leopardus wiedii NC028318 1           | 0,14646322 |
| Mungotictis decemlineata NC027828 1   | Leopardus pardalis T262 1             | 0,14646323 |
| Paradoxurus hermaphroditus NLNC 1     | Acinonyx jubatus NC005212 3           | 0,14646775 |
| Leopardus pardalis T262 1             | Cryptoprocta ferox FC13 1             | 0,14646864 |
| Fossa fossana D350 1                  | Acinonyx jubatus NC005212 3           | 0,14647007 |
| Ursa javanica/auropunctata NC006835 1 | Hemigalus derbyanus MH464791 1        | 0,14649099 |
| Erigonathus barbatus NC008426 1       | Arctocepalus forsteri NC004023 28     | 0,14650041 |
| Mungos mungo MMC7 1                   | Genetta servalina NC024568 2          | 0,14651959 |
| Viverra zibetha T609 1                | Panthera onca KP202264 2              | 0,14652567 |
| Mungotictis decemlineata NC027828 1   | Lynx lynx NC027083 4                  | 0,14652641 |
| Leopardus jacobita NC028322 1         | Genetta genetia T297 1                | 0,14652686 |
| Mungotictis decemlineata NC027828 1   | Leopardus pardalis NC028315 1         | 0,14653054 |
| Paradoxurus jerdoni MH464793 1        | Catopuma badia NC028300 1             | 0,146532   |
| Urocyon cinereoargenteus NC026723 21  | Canis mesomelas KT448280 1            | 0,14654979 |
| Hemigalus derbyanus MH464791 1        | Fossa fossana D350 1                  | 0,14657161 |
| Erigonathus barbatus NC008426 1       | Arctocepalus forsteri KT693377 17     | 0,14657786 |
| Galidia elegans D146 1                | Cynictis penicillata T375 1           | 0,14658298 |
| Chrotogale owstoni T607 1             | Catopuma badia NC028300 1             | 0,14658435 |
| Paradoxurus hermaphroditus NLNC 1     | Leopardus pardalis T262 1             | 0,14658876 |
| Viverricula indica NC025296 2         | Mungos mungo MMC7 1                   | 0,14659093 |
| Viverricula indica NK891751 1         | Lynx lynx NC027083 4                  | 0,14659104 |
| Leopardus geoffroyi NC028320 1        | Fossa fossana D350 1                  | 0,14659131 |
| Mungos mungo MMC7 1                   | Leopardus wiedii NC028318 1           | 0,14659147 |
| Prionailurus bengalensis CKM45 20     | Crossarchus platycephalus C7R66 1     | 0,14659411 |
| Lynx canadensis NC028313 1            | Galidictis fasciata DM333 1           | 0,1465949  |
| Panthera tigris NC010642 35           | Nandinia binotata NC024567 1          | 0,14659782 |
| Prionodon pardicolor NC024569 2       | Catopuma badia NC028300 1             | 0,14660624 |
| Paradoxurus hermaphroditus NLNC 1     | Homotherium latidens MF871702 3       | 0,1466265  |
| Nandinia binotata NC024567 1          | Chrotogale owstoni T607 1             | 0,14663649 |
| Leptailurus serval NC028316 1         | Diplogale hosei MH464790 1            | 0,14664018 |
| Meles leucurus NC039173 4             | Lontra canadensis SRR10409165 1       | 0,14664513 |
| Puma concolor NC016470 22             | Chrotogale owstoni T607 1             | 0,14664809 |
| Vulpes lagopus NC026529 3             | Lyaon pictus NC028427 2               | 0,14664856 |
| Viverricula indica NK891745 1         | Prionodon linsang ERR2391707 1        | 0,14665341 |
| Viverricula indica NK891745 1         | Crossarchus platycephalus C7R66 1     | 0,14665417 |
| Otocolobus manul NC028323 1           | Hemigalus derbyanus MH464791 1        | 0,14665812 |
| Genetta servalina NC024568 2          | Galerella sanguinea T378 1            | 0,14666523 |
| Ursa javanica/auropunctata NC006835 1 | Galidia elegans D146 1                | 0,14666588 |
| Crossarchus platycephalus C7R66 1     | Civettictis civetta NC033378 1        | 0,14666843 |
| Viverricula indica NC025296 2         | Ursa javanica/auropunctata NC006835 1 | 0,14669038 |
| Vulpes corsac NC023958 1              | Urocyon cinereoargenteus NC026723 21  | 0,14670438 |
| Prionailurus viverrinus NC028305 1    | Chrotogale owstoni T607 1             | 0,14671588 |
| Viverra zibetha T609 1                | Panthera leo spelaea KX258452 2       | 0,14672557 |
| Paguma larvata PDD511 2               | Leopardus jacobita NC028322 1         | 0,14672559 |
| Paguma larvata PDD511 2               | Lynx lynx NC027083 4                  | 0,14672588 |
| Viverricula indica NK891751 1         | Lynx rufus NC014456 3                 | 0,14672604 |
| Puma concolor NC016470 22             | Paguma larvata PDD511 2               | 0,14672682 |
| Leopardus jacobita NC028322 1         | Fossa fossana D350 1                  | 0,14672723 |
| Phoca largha NC008430 1               | Arctocepalus pusillus NC008417 1      | 0,14672753 |
| Salanoia concolor D378 1              | Lynx pardinus NC028319 161            | 0,14672993 |
| Paguma larvata PDD511 2               | Leopardus geoffroyi NC028320 1        | 0,14673258 |
| Monachus monachus NC044972 5          | Arctocepalus pusillus NC008417 1      | 0,1467586  |
| Mephitis mephitis NC020648 1          | Conepatus chinga NC042596 1           | 0,1467644  |
| Otaria byronia OTAB 1                 | Erigonathus barbatus NC008426 1       | 0,14678413 |
| Viverricula indica NK891745 1         | Bdeogale nigripes GLC15 1             | 0,14678846 |
| Salanoia concolor D378 1              | Genetta servalina NC024568 2          | 0,14679296 |
| Prionailurus planiceps KY682741 4     | Paradoxurus hermaphroditus NLNC 1     | 0,1467931  |
| Pusa hispida NC 008433 1              | Arctocepalus pusillus NC008417 1      | 0,14679444 |
| Galictis vittata T412 1               | Arctonyx collaris NC020645 1          | 0,14679673 |
| Mungotictis decemlineata NC027828 1   | Lynx pardinus NC028319 161            | 0,14679691 |
| Salanoia concolor D378 1              | Lynx rufus NC014456 3                 | 0,146797   |
| Lynx pardinus NC028319 161            | Galictis fasciata DM333 1             | 0,1467973  |
| Prionailurus bengalensis NC028301 12  | Mungotictis decemlineata NC027828 1   | 0,14679848 |
| Nyctereutes procyonoides NC013700 3   | Cuon alpinus NC013445 3               | 0,14680761 |
| Monachus monachus NC044972 5          | Arctocepalus gazella BK010918 1       | 0,14681751 |

|                                      |                                      |            |
|--------------------------------------|--------------------------------------|------------|
| Genetta abyssinica MG489822 1        | Arctocepalus forsteri KT693377 17    | 0,18492243 |
| Nyctereutes procyonoides NC013700 3  | Acinonyx jubatus NC005212 3          | 0,18492399 |
| Ursus spelaeus EU327344 13           | Prionailurus rubiginosus NC028304 2  | 0,18492477 |
| Ursus thibetanus laniger MH281753 2  | Lynx lynx NC027083 4                 | 0,18492568 |
| Ursus spelaeus EU327344 13           | Leopardus geoffroyi NC028320 1       | 0,18492787 |
| Genetta servalina NC024568 2         | Canis mesomelas KT448280 1           | 0,18492845 |
| Leopardus wiedii NC028318 1          | Galictis vittata T412 1              | 0,18492858 |
| Lycalopex sechurae KT448284 1        | Leopardus pardalis NC028315 1        | 0,18493047 |
| Smilodon populator MF871700 1        | Melogale moschata NC020644 1         | 0,18493663 |
| Martes foina NC020643 1              | Hemigalus derbyanus MH464791 1       | 0,18493782 |
| Genetta abyssinica MG489822 1        | Ailuropoda melanoleuca NC009492 5    | 0,18494469 |
| Taxidea taxus NC020646 1             | Cynogale bennetti KY117544 1         | 0,18494968 |
| Leopardus guigna NC028321 1          | Eumetopias jubatus NC004030 10       | 0,18495145 |
| Tremarctos ornatus NC009969 2        | Crossarchus platycephalus C7R66 1    | 0,18495195 |
| Mustela nigripes NC024942 1          | Arctocepalus australis MGO23139 1    | 0,18495591 |
| Crossarchus platycephalus C7R66 1    | Arctocepalus townsendi NC008420 1    | 0,1849571  |
| Mustela sibirica NC020637 6          | Ursa brachyura KY117547 1            | 0,1849573  |
| Mungos mungo/gambianus SRR77048      | Arctocepalus forsteri KT693377 17    | 0,1849575  |
| Mustela nivalis T306 5               | Lycalopex sechurae KT448284 1        | 0,18495791 |
| Potos flavus T414 1                  | Ursa javanica T413 1                 | 0,18495858 |
| Leopardus tigrinus NC028317 1        | Conepatus chinga NC042596 1          | 0,1849609  |
| Galidia elegans D146 1               | Aonyx cinerea NC035814 2             | 0,18496166 |
| Leopardus tigrinus NC028317 1        | Tapirus terrestris T358              | 0,18496294 |
| Taxidea taxus NC020646 1             | Helogale parvula SRR7637809 1        | 0,18496361 |
| Genetta genetia T297 1               | Callorhinus ursinus NC008415 1       | 0,18496622 |
| Civettictis civetta GLC19 1          | Arctocepalus australis MGO23139 1    | 0,18496625 |
| Ictonyx striatus T299 1              | Crossarchus platycephalus C7R66 1    | 0,18496798 |
| Vulpes lagopus NC026529 3            | Genetta servalina NC024568 2         | 0,18496822 |
| Ursus arctos pruinus MG066703 3      | Martes melampus NC009678 1           | 0,18496825 |
| Martes foina NC020643 1              | Chrotogale owstoni T607 1            | 0,18496908 |
| Ichneumia albicauda T603 1           | Arctonyx collaris NC020645 1         | 0,18496941 |
| Viverra tangalunga MH464792 1        | Panthera uncia KP202269 1            | 0,18496957 |
| Mustela nigripes NC024942 1          | Cryptoprocta ferox FC13 1            | 0,18496987 |
| Lyaon pictus NC028427 2              | Ursa semitorquata MH464789 1         | 0,18497002 |
| Viverra zibetha T609 1               | Phocarcos hookeri NC008418 1         | 0,18497039 |
| Vulpes corsac NC023958 1             | Lynx rufus NC014456 3                | 0,18497117 |
| Lynx canadensis NC028313 1           | Arctocepalus forsteri KT693377 17    | 0,18497141 |
| Vulpes lagopus NC026529 3            | Prionailurus planiceps KY682741 4    | 0,18497184 |
| Vulpes corsac NC023958 1             | Neovison vison NC020641 3            | 0,18497217 |
| Lynx canadensis NC028313 1           | Lontra canadensis SRR10409165 1      | 0,18497218 |
| Vulpes zerda KJ603240 1              | Lynx canadensis NC028313 1           | 0,18497227 |
| Lyaon pictus NC028427 2              | Ursa javanica T413 1                 | 0,18497232 |
| Leopardus guigna NC028321 1          | Arctocepalus australis MGO23139 1    | 0,18497369 |
| Poecilogale albinucha T602 1         | Paradoxurus hermaphroditus NC03959   | 0,18497425 |
| Zalophus wollebakei SRR4431565 1     | Eupleres goudotii D128 1             | 0,18497503 |
| Neovison vison NC020641 3            | Helogale parvula SRR7637809 1        | 0,1849751  |
| Ursus arctos pruinus MG066703 3      | Arctonyx collaris NC020645 1         | 0,18497598 |
| Ursus arctos GU573486 5              | Fossa fossana D350 1                 | 0,18497618 |
| Procyon lotor AB462049 4             | Leopardus tigrinus NC028317 1        | 0,18497755 |
| Prionailurus planiceps KY682741 4    | Lutrogale perspicillata NC035811 1   | 0,1849781  |
| Poecilogale albinucha T602 1         | Leopardus jacobita NC028322 1        | 0,18497857 |
| Panthera tigris NC010642 35          | Mustela kathiah NC023210 1           | 0,18497859 |
| Melogale moschata NC020644 1         | Caracal caracal NC028306 1           | 0,18497877 |
| Melogale moschata NC020644 1         | Catopuma temminckii NC027115 41      | 0,18497927 |
| Leopardus tigrinus NC028317 1        | Arctotherium sp NC030174 1           | 0,18497938 |
| Caracal caracal NC028306 1           | Aonyx cinerea NC035814 2             | 0,1849796  |
| Tremarctos ornatus NC009969 2        | Ictonyx striatus T299 1              | 0,18497968 |
| Mustela nivalis T306 5               | Felis nigripes NC028309 1            | 0,18498006 |
| Ursus maritimus GU573488 Svalbard    | Otaria byronia OTAB 1                | 0,18498017 |
| Otocyon megalotis SAF 1 2            | Leopardus tigrinus NC028317 1        | 0,18498047 |
| Otocyon megalotis SAF 1 2            | Felis silvestris Ilybia KP202275 4   | 0,18498062 |
| Otaria byronia OTAB 1                | Catopuma badia NC028300 1            | 0,18498135 |
| Procyon lotor AB462049 4             | Leopardus geoffroyi NC028320 1       | 0,1849817  |
| Melurus ursinus NC009970 2           | Lutra sumatrana NC035810 1           | 0,18498503 |
| Ursus thibetanus thibetanus NC011118 | Chrotogale owstoni T607 1            | 0,1849851  |
| Ursus thibetanus thibetanus NC011118 | Phocarcos hookeri NC008418 1         | 0,184986   |
| Arctocepalus townsendi NC008420 1    | Acinonyx jubatus NC005212 3          | 0,1849865  |
| Melurus ursinus NC009970 2           | Bassariscus sumichrasti SRX1099089 1 | 0,18498732 |
| Prionodon pardicolor NC024569 2      | Ommatophoca osii AY377287etc 1       | 0,18498835 |
| Ursus arctos GU573486 5              | Genetta abyssinica MG489822 1        | 0,1849889  |
| Mustela nigripes NC024942 1          | Ailuropoda melanoleuca NC009492 5    | 0,18498957 |
| Ursus thibetanus formosanus NC0093   | Paradoxurus jerdoni MH464793 1       | 0,18499041 |
| Tremarctos ornatus NC009969 2        | Acinonyx jubatus NC005212 3          | 0,18499057 |
| Ichneumia albicauda T603 1           | Canis lupus chanco NC010340 4        | 0,18499108 |
| Ursus arctos AP012576 6              | Mustela itarsi NC034330 19           | 0,18499193 |
| Ursus spelaeus NC011112 8            | Lynx canadensis NC028313 1           | 0,18499495 |
| Ursus thibetanus formosanus NC0093   | Prionailurus rubiginosus NC028304 2  | 0,18499543 |
| Mustela itarsi NC034330 19           | Ursa javanica/auropunctata NC006835  | 0,18499574 |
| Ursus spelaeus NC011112 8            | Felis margarita NC028308 1           | 0,18499619 |
| Catopuma badia NC028300 1            | Ailuropoda melanoleuca NC009492 5    | 0,18499793 |
| Ursus thibetanus thibetanus NC011118 | Prionailurus bengalensis NC028301 12 | 0,18499808 |
| Ursus thibetanus laniger MH281753 2  | Prionailurus bengalensis CKM45 20    | 0,18500021 |
| Lontra canadensis SRR10409165 1      | Eumetopias jubatus NC004030 10       | 0,18500115 |
| Genetta genetia T297 1               | Canis lupus familiaris NC002008 1231 | 0,18500364 |
| Conepatus chinga NC042596 1          | Civettictis civetta NC033378 1       | 0,18500584 |
| Ursus arctos AP012576 6              | Canis adustus KT448271 1             | 0,1850066  |
| Leopardus pardalis NC028315 1        | Arctocepalus forsteri NC004023 28    | 0,18500842 |
| Otocolobus manul NC028323 1          | Gulo gulo NC009685 3                 | 0,18501112 |
| Ursus thibetanus formosanus NC0093   | Leopardus colocolo NC028314 1        | 0,18501283 |
| Ursus spelaeus EU327344 13           | Ictonyx striatus T299 1              | 0,18501517 |
| Puma concolor NC016470 22            | Cuon alpinus NC013445 3              | 0,18501569 |
| Martes melampus NC009678 1           | Ursa javanica T413 1                 | 0,18501979 |
| Paradoxurus jerdoni MH464793 1       | Enhydra lutris NC009692 1            | 0,18502012 |
| Lontra canadensis SRR10409165 1      | Callorhinus ursinus NC008415 1       | 0,18502194 |
| Lontra canadensis SRR10409165 1      | Fossa fossana D350 1                 | 0,18502256 |
| Fossa fossana D350 1                 | Canis latrans NC008093 7             | 0,18502611 |
| Martes zibellina NC011579 39         | Canis anthus NC027956 2              | 0,18502651 |
| Ursa javanica/auropunctata NC006835  | Canis lupus familiaris NC002008 1231 | 0,18502653 |
| Mungotictis decemlineata NC027828 1  | Enhydra lutris NC009692 1            | 0,18502682 |
| Galidictis fasciata DM333 1          | Enhydra lutris NC009692 1            | 0,18502723 |
| Ursa javanica T413 1                 | Canis latrans NC008093 7             | 0,1850275  |
| Bassariscus neblina SRX1097850 1     | Arctocepalus forsteri KT693377 17    | 0,18502782 |

|                                       |                                          |            |
|---------------------------------------|------------------------------------------|------------|
| Smilodon populator MF871700 1         | Paradoxurus hermaphroditus NLNC 1        | 0,14682744 |
| Hemigalus derbyanus MH464791 1        | Galerella sanguinea T378 1               | 0,14683121 |
| Pusa sibirica NC008432 2              | Phocarcos hookeri NC008418 1             | 0,14684698 |
| Pusa caspica NC008431 1               | Neophoca cinerea NC008419 1              | 0,14684808 |
| Pusa caspica NC008431 1               | Arctocepalus gazella BK010918 1          | 0,14684871 |
| Pusa caspica NC008431 1               | Otaria byronia OTAB 1                    | 0,14685027 |
| Phoca groenlandica NC008429 54        | Arctocepalus gazella BK010918 1          | 0,14685443 |
| Pusa hispida NC 008433 1              | Phocarcos hookeri NC008418 1             | 0,14685816 |
| Prionailurus bengalensis NC028301 12  | Urva semitorquata MH464789 1             | 0,14686024 |
| Paradoxurus jerdoni MH464793 1        | Leptailurus serval NC028316 1            | 0,14686082 |
| Panthera pardus japonensis KJ866876 8 | Civettictis civetta GLC19 1              | 0,14686309 |
| Prionailurus bengalensis CKM45 20     | Paradoxurus hermaphroditus NLNC 1        | 0,14686385 |
| Hyaena hyaena NC020669 1              | Crossarchus platycephalus C7R66 1        | 0,14686422 |
| Leopardus wiedii NC028318 1           | Galidictis fasciata DM333 1              | 0,14686853 |
| Prionodon pardicolor NC024569 2       | Prionailurus bengalensis NC028301 12     | 0,14687221 |
| Prionodon linsang ERR2391707 1        | Hemigalus derbyanus MH464791 1           | 0,14688964 |
| Felis nigripes NC028309 1             | Diplogale hosei MH464790 1               | 0,14690214 |
| Vulpes corsac NC023958 1              | Urocyon littoralis catalinae KP129018 15 | 0,14690635 |
| Leopardus wiedii NC028318 1           | Chrotogale owstoni T607 1                | 0,14691566 |
| Civettictis civetta GLC19 1           | Bdeogale nigripes GLC15 1                | 0,14692384 |
| Panthera leo spelaea KX258452 2       | Civettictis civetta GLC19 1              | 0,14692786 |
| Profelis aurata NC028299 1            | Paradoxurus hermaphroditus NLNC 1        | 0,14692843 |
| Phoca largha NC008430 1               | Otaria byronia OTAB 1                    | 0,14692855 |
| Mungotictis decemlineata NC027828 1   | Lynx canadensis NC028313 1               | 0,14693122 |
| Profelis aurata NC028299 1            | Genetta genetta T297 1                   | 0,14693919 |
| Urva javanica/auropunctata NC006835 1 | Genetta abyssinica MG489822 1            | 0,14693446 |
| Prionodon pardicolor NC024569 2       | Prionailurus planiceps NC028312 6        | 0,14693889 |
| Viverricula indica KX891745 1         | Urva javanica/auropunctata NC006835 1    | 0,14695629 |
| Viverricula indica NC025296 2         | Panthera leo NERO 19                     | 0,14696306 |
| Neophoca cinerea NC008419 1           | Mirounga leonina NC008422 1              | 0,14698146 |
| Leopardus tigrinus NC028317 1         | Chrotogale owstoni T607 1                | 0,14698327 |
| Chrotogale owstoni T607 1             | Caracal caracal NC028306 1               | 0,14698416 |
| Urva javanica T413 1                  | Hemigalus derbyanus MH464791 1           | 0,14698455 |
| Prionailurus bengalensis CKM45 20     | Chrotogale owstoni T607 1                | 0,14698827 |
| Vulpes ferrillata NC027935 1          | Chrysocyon brachyurus NC024172 1         | 0,14698903 |
| Paradoxurus hermaphroditus NLNC 1     | Nandinia binotata NC024567 1             | 0,14698973 |
| Prionailurus rubiginosus NC028304 2   | Paradoxurus hermaphroditus NLNC 1        | 0,14699526 |
| Prionailurus bengalensis NC028301 12  | Attilax paludinosus T606 1               | 0,14699562 |
| Panthera leo spelaea KX258452 2       | Nandinia binotata NC024567 1             | 0,14699739 |
| Parahyaena brunnea NC038159 15        | Galidictis fasciata DM333 1              | 0,1469982  |
| Otaria byronia OTAB 1                 | Monachus schauinslandi NC008421 1        | 0,1470001  |
| Genetta genetta T297 1                | Catopuma temminckii NC027115 41          | 0,14700113 |
| Leopardus pardalis NC028315 1         | Chrotogale owstoni T607 1                | 0,1470501  |
| Urva javanica T413 1                  | Eupleres goudotii D128 1                 | 0,14705113 |
| Pusa caspica NC008431 1               | Arctocepalus pusillus NC008417 1         | 0,14705333 |
| Mirounga angustirostris SRR10331586 1 | Arctocepalus forsteri KT693377 17        | 0,14705826 |
| Genetta servalina NC024568 2          | Crossarchus platycephalus C7R66 1        | 0,14705867 |
| Crossarchus platycephalus C7R66 1     | Civettictis civetta GLC19 1              | 0,14705887 |
| Paradoxurus hermaphroditus NLNC 1     | Leopardus pardalis NC028315 1            | 0,14706002 |
| Ichneumia albicauda T603 1            | Hemigalus derbyanus MH464791 1           | 0,1470623  |
| Salanoia concolor D378 1              | Catopuma temminckii NC027115 41          | 0,14706428 |
| Puma yagouaroundi NC028311 1          | Genetta genetta T297 1                   | 0,14706603 |
| Genetta genetta T297 1                | Felis chaus NC028307 1                   | 0,14706641 |
| Nandinia binotata NC024567 1          | Galidia elegans D146 1                   | 0,14712073 |
| Otaria byronia OTAB 1                 | Mirounga leonina NC008422 1              | 0,14712246 |
| Phoca fasciata NC008428 1             | Arctocepalus forsteri KT693377 17        | 0,14712352 |
| Phocarcos hookeri NC008418 1          | Lobodon carinophaga NC008423 1           | 0,14712791 |
| Viverricula indica KX891751 1         | Pardofelis marmorata NLN3 2              | 0,14713046 |
| Parahyaena brunnea NC038159 15        | Crossarchus platycephalus C7R66 1        | 0,1471331  |
| Paradoxurus hermaphroditus NC039591 1 | Acinonyx jubatus NC005212 3              | 0,14714043 |
| Leopardus jacobita NC028322 1         | Arctictis binturong T605 2               | 0,14714296 |
| Lynx rufus NC014456 3                 | Arctictis binturong T605 2               | 0,14714403 |
| Leopardus colocolo NC028314 1         | Cryptoprocta ferox FC13 1                | 0,14715593 |
| Phocarcos hookeri NC008418 1          | Mirounga leonina NC008422 1              | 0,14718257 |
| Erigonathus barbatus NC008426 1       | Arctocepalus australis MG023139 1        | 0,14718381 |
| Nandinia binotata NC024567 1          | Mungos mungo MMC7 1                      | 0,14718725 |
| Ichneumia albicauda T603 1            | Galidia elegans D146 1                   | 0,14719021 |
| Viverricula indica KX891751 1         | Mungos mungo MMC7 1                      | 0,1471919  |
| Diplogale hosei MH464790 1            | Catopuma badia NC028300 1                | 0,14719735 |
| Viverricula indica NC025296 2         | Crossarchus platycephalus C7R66 1        | 0,1471986  |
| Panthera uncia NC010638 1             | Civettictis civetta GLC19 1              | 0,1471996  |
| Ichneumia albicauda T603 1            | Cryptoprocta ferox FC13 1                | 0,14720519 |
| Paradoxurus hermaphroditus NC039591 1 | Catopuma badia NC028300 1                | 0,14720584 |
| Zalophus wollebaeki SRR4431565 1      | Phoca largha NC008430 1                  | 0,14720683 |
| Lynx lynx NC027083 4                  | Arctictis binturong T605 2               | 0,14721111 |
| Monachus monachus NC044972 5          | Arctocepalus australis MG023139 1        | 0,14722142 |
| Panthera pardus NC010641 5            | Civettictis civetta GLC19 1              | 0,14723113 |
| Vulpes ferrillata NC027935 1          | Urocyon cinereoargenteus NC026723 21     | 0,14724298 |
| Vulpes ferrillata NC027935 1          | Urocyon littoralis catalinae KP129018 15 | 0,14724298 |
| Leopardus pardalis T262 1             | Chrotogale owstoni T607 1                | 0,14725168 |
| Pusa sibirica NC008432 2              | Arctocepalus pusillus NC008417 1         | 0,14725518 |
| Pusa hispida NC 008433 1              | Arctocepalus forsteri KT693377 17        | 0,14726293 |
| Neophoca cinerea NC008419 1           | Monachus schauinslandi NC008421 1        | 0,14726315 |
| Prionailurus rubiginosus NC028304 2   | Paradoxurus hermaphroditus NC039591 1    | 0,14726427 |
| Puma concolor NC016470 22             | Attilax paludinosus T606 1               | 0,14726442 |
| Leopardus tigrinus NC028317 1         | Fossa fossana D350 1                     | 0,14726591 |
| Meles anakuma NC009677 1              | Galictis vittata T412 1                  | 0,14726742 |
| Leopardus jacobita NC028322 1         | Galidictis fasciata DM333 1              | 0,14727227 |
| Zalophus wollebaeki SRR4431565 1      | Phoca vitulina NC001325 1                | 0,14727433 |
| Leopardus colocolo NC028314 1         | Crossarchus platycephalus C7R66 1        | 0,14728287 |
| Smilodon populator MF871700 1         | Prionodon linsang ERR2391707 1           | 0,14728402 |
| Monachus schauinslandi NC008421 1     | Arctocepalus australis MG023139 1        | 0,14732872 |
| Lynx lynx NC027083 4                  | Crossarchus platycephalus C7R66 1        | 0,14732942 |
| Phoca largha NC008430 1               | Neophoca cinerea NC008419 1              | 0,14733028 |
| Paguma larvata PDD511 2               | Leopardus tigrinus NC028317 1            | 0,14733167 |
| Viverricula indica KX891751 1         | Lynx canadensis NC028313 1               | 0,1473318  |
| Mungos mungo/gambianus SRR770482 1    | Leopardus wiedii NC028318 1              | 0,14733239 |
| Leopardus wiedii NC028318 1           | Attilax paludinosus T606 1               | 0,14733356 |
| Mirounga angustirostris SRR10331586 1 | Arctocepalus pusillus NC008417 1         | 0,14733461 |
| Galerella sanguinea T378 1            | Civettictis civetta GLC19 1              | 0,14733876 |
| Leopardus pardalis NC028315 1         | Cryptoprocta ferox FC13 1                | 0,14734375 |
| Leopardus wiedii NC028318 1           | Cryptoprocta ferox FC13 1                | 0,1473438  |
| Taxidea taxus NC020646 1              | Lutrogale perspicillata NC035811 1       | 0,14734517 |

|                                      |                                     |            |
|--------------------------------------|-------------------------------------|------------|
| Procyon lotor AB462049 4             | Fossa fossana D350 1                | 0,1850279  |
| Leopardus pardalis T262 1            | Ailurus fulgens styani NC009691 1   | 0,18503268 |
| Lynx rufus NC014456 3                | Ailurus fulgens styani NC009691 1   | 0,18503268 |
| Canis anthus NC027956 2              | Arctonyx collaris NC020645 1        | 0,18503296 |
| Leopardus geoffroyi NC028320 1       | Tapirus terrestris T358             | 0,18503439 |
| Felis catus NC001700 2               | Callorhinus ursinus NC008415 1      | 0,18503477 |
| Lynx rufus NC014456 3                | Canis mesomelas KT448280 1          | 0,18503478 |
| Mustela altaica NC021751 1           | Cynictis penicillata T375 1         | 0,18503487 |
| Panthera uncia KP202269 1            | Mustela nigripes NC024942 1         | 0,18503746 |
| Mustela eversmannii NC028013 1       | Felis nigripes NC028309 1           | 0,18503751 |
| Mustela putorius NC020638 4          | Felis chaus NC028307 1              | 0,18503845 |
| Vulpes ferrillata NC027935 1         | Lynx rufus NC014456 3               | 0,18503879 |
| Melogale moschata V0735A 1           | Felis margarita NC028308 1          | 0,18503903 |
| Mustela kathiah NC023210 1           | Ichneumia albicauda T603 1          | 0,1850394  |
| Vulpes corsac NC023958 1             | Leptailurus serval NC028316 1       | 0,18503949 |
| Panthera uncia KP202269 1            | Puma yagouaroundi NC028311 1        | 0,18503952 |
| Prionailurus planiceps NC028312 6    | Arctocepalus gazella BK010918 1     | 0,18503958 |
| Parahyaena brunnea NC038159 15       | Mustela putorius NC020638 4         | 0,1850407  |
| Lynx maritimus GU573488 Svalbard     | Meles anakuma NC009677 1            | 0,18504187 |
| Ursus canadensis NC028313 1          | Lutrogale perspicillata NC035811 1  | 0,18504331 |
| Panthera onca NC022842 1             | Meles leucurus NC039173 4           | 0,18504348 |
| Felis nigripes NC028309 1            | Arctocepalus pusillus NC008417 1    | 0,18504454 |
| Nasua nasua NC020647 1               | Galictis vittata T412 1             | 0,18504474 |
| Viverricula indica KX891745 1        | Ursus arctos isabellinus 18B5 2     | 0,18504474 |
| Prionailurus rubiginosus NC028304 2  | Arctocepalus pusillus NC008417 1    | 0,18504529 |
| Pardofelis marmorata NLN3 2          | Mustela altaica NC021751 1          | 0,1850455  |
| Prionailurus planiceps NC028312 6    | Poecilogale albinucha T602 1        | 0,18504579 |
| Puma concolor NC016470 22            | Poecilogale albinucha T602 1        | 0,18504597 |
| Poecilogale albinucha T602 1         | Leopardus tigrinus NC028317 1       | 0,18504651 |
| Puma yagouaroundi NC028311 1         | Arctotherium sp NC030174 1          | 0,18504708 |
| Prionailurus planiceps KY682741 4    | Otaria byronia OTAB 1               | 0,18504749 |
| Panthera leo spelaea KX258452 2      | Mustela frenata NC020640 1          | 0,18504755 |
| Panthera tigris NC010642 35          | Mustela erminea T305 2              | 0,18504868 |
| Prionailurus rubiginosus NC028304 2  | Otaria byronia OTAB 1               | 0,18504894 |
| Viverricula indica NC025296 2        | Speothos venustus C48 2             | 0,18505019 |
| Ursus spelaeus EU327344 13           | Chrotogale owstoni T607 1           | 0,18505244 |
| Galerella sanguinea T378 1           | Canis lupus chanco NC010340 4       | 0,18505344 |
| Viverra zibetha T609 1               | Ailuropus mandchourensis NC009492 5 | 0,18505374 |
| Lycalopex schuereae KT448284 1       | Ailurus fulgens NC011124 1          | 0,18505719 |
| Parahyaena brunnea NC038159 15       | Neovison vison NC020641 3           | 0,18505904 |
| Smilodon populator MF871700 1        | Chrysocyon brachyurus NC024172 1    | 0,18505959 |
| Ursus spelaeus EU327344 13           | Profelis aurata NC028299 1          | 0,18506017 |
| Ursus thibetanus thibetanus NC011118 | Lynx pardinus NC028319 161          | 0,18506169 |
| Ursus thibetanus laniger MH281753 2  | Paradoxurus jerdoni MH464793 1      | 0,18506193 |
| Mephitis mephitis NC020648 1         | Civettictis civetta GLC19 1         | 0,18506277 |
| Prionailurus bengalensis NC028301 12 | Galictis vittata T412 1             | 0,18506357 |
| Ursus spelaeus NC011112 8            | Leopardus jacobita NC028322 1       | 0,18506393 |
| Neophoca cinerea NC008419 1          | Genetta abyssinica MG489822 1       | 0,18506396 |
| Ursus thibetanus thibetanus NC011118 | Leptailurus serval NC028316 1       | 0,18506567 |
| Prionailurus rubiginosus NC028304 2  | Mustela ursinus NC009970 2          | 0,18506601 |
| Melurus ursinus NC009970 2           | Catopuma temminckii NC027115 41     | 0,18506704 |
| Panthera leo NERO 19                 | Enhydra lutris NC009692 1           | 0,18506758 |
| Meles leucurus NC039173 4            | Canis lupus chanco NC010340 4       | 0,18507174 |
| Canis adustus KT448271 1             | Arctocepalus gazella BK010918 1     | 0,18507276 |
| Otaria byronia OTAB 1                | Hemigalus derbyanus MH464791 1      | 0,18507475 |
| Melurus ursinus NC009970 2           | Genetta abyssinica MG489822 1       | 0,18507686 |
| Leopardus tigrinus NC028317 1        | Arctocepalus forsteri NC040023 28   | 0,18507741 |
| Meles leucurus NC039173 4            | Canis adustus KT448271 1            | 0,18508148 |
| Paguma larvata PDD511 2              | Cuon alpinus NC013445 3             | 0,18508242 |
| Mungos mungo/gambianus SRR770482 1   | Lutra sumatrana NC035810 1          | 0,18508676 |
| Cuon alpinus NC013445 3              | Catopuma temminckii NC027115 41     | 0,18508795 |
| Puma concolor NC016470 22            | Canis mesomelas KT448280 1          | 0,18508834 |
| Phoca groenlandica NC008429 54       | Cynogale bennetti KY117544 1        | 0,18508871 |
| Eupleres goudotii D128 1             | Arctonyx collaris NC020645 1        | 0,18508998 |
| Mungos mungo MMC7 1                  | Melogale moschata KP726273 1        | 0,18509033 |
| Martes zibellina NC011579 39         | Xenogale naso C07AR110 1            | 0,18509096 |
| Mungos mungo/gambianus SRR770482 1   | Arctocepalus townsendi NC008420 1   | 0,18509121 |
| Ursus arctos GU573491 207            | Smilodon populator MF871700 1       | 0,18509339 |
| Viverra tangalunga MH464792 1        | Cynictis penicillata T375 1         | 0,18509354 |
| Potos flavus T414 1                  | Eupleres goudotii D128 1            | 0,18509416 |
| Leopardus guigna NC028321 1          | Cuon alpinus NC013445 3             | 0,18509448 |
| Cuon alpinus NC013445 3              | Arctictis binturong T605 2          | 0,18509515 |
| Procyon lotor AB462046 3             | Crossarchus platycephalus C7R66 1   | 0,18509527 |
| Cynogale bennetti KY117544 1         | Ailurus fulgens styani NC009691 1   | 0,18509686 |
| Viverricula indica KX891751 1        | Lutra sumatrana NC035810 1          | 0,18509801 |
| Lutra lutra NC011358 9               | Felis catus NC001700 2              | 0,18509987 |
| Lutra sumatrana NC035810 1           | Civettictis civetta GLC19 1         | 0,18509988 |
| Pardofelis marmorata NLN3 2          | Meles meles T303 3                  | 0,1851     |
| Lutra lutra NC011358 9               | Felis nigripes NC028309 1           | 0,18510008 |
| Mustela nivalis T306 5               | Eupleres goudotii D128 1            | 0,18510048 |
| Felis silvestris lybica KP202275 4   | Conepatus chinga NC042596 1         | 0,18510069 |
| Prionailurus planiceps KY682741 4    | Ailurus fulgens styani NC009691 1   | 0,18510205 |
| Panthera uncia NC010638 1            | Mustela kathiah NC023210 1          | 0,18510365 |
| Zalophus wollebaeki SRR4431565 1     | Hemigalus derbyanus MH464791 1      | 0,18510386 |
| Ursus maritimus GU573488 Svalbard    | Martes pennanti NC020664 16         | 0,18510412 |
| Potos flavus T414 1                  | Panthera uncia KP202269 1           | 0,18510452 |
| Panthera onca KP202264 2             | Mustela putorius NC020638 4         | 0,18510464 |
| Salanoia concolor D378 1             | Mustela nivalis T306 5              | 0,18510561 |
| Martes pennanti NC020664 16          | Canis anthus NC027956 2             | 0,1851061  |
| Prionodon pardicolor NC024569 2      | Mustela putorius NC020638 4         | 0,18510704 |
| Genetta servalina NC024568 2         | Aonyx cinerea NC020638 4            | 0,18510759 |
| Lynx canadensis NC028313 1           | Canis anthus NC027956 2             | 0,18510759 |
| Leopardus tigrinus NC028317 1        | Canis anthus NC027956 2             | 0,18510772 |
| Profelis aurata NC028299 1           | Martes zibellina NC011579 39        | 0,18510799 |
| Leopardus colocolo NC028314 1        | Cuon alpinus NC013445 3             | 0,1851083  |
| Lontra canadensis SRR10409165 1      | Leopardus jacobita NC028322 1       | 0,18510874 |
| Prionailurus bengalensis NC028301 12 | Lontra canadensis SRR10409165 1     | 0,18510877 |
| Vulpes corsac NC023958 1             | Catopuma temminckii NC027115 41     | 0,18510933 |
| Ursus thibetanus mupinensis NC00875  | Procyon lotor AB462049 4            | 0,18511134 |
| Ursus arctos GU573491 207            | Bassariscus sumichrasti SRX109089 1 | 0,18511184 |
| Ursus maritimus GU573488 Svalbard    | Aonyx cinerea NC020638 4            | 0,18511233 |
| Ursus maritimus GU573488 Svalbard    | Mustela altaica NC021751 1          | 0,18511386 |
| Leopardus tigrinus NC028317 1        | Aonyx cinerea NC020638 4            | 0,18511471 |

|                                          |                                       |            |
|------------------------------------------|---------------------------------------|------------|
| Leopardus geoffroyi NC028320 1           | Arctictis binturong T605 2            | 0,14735284 |
| Homotherium latidens MF871702 3          | Fossa fossana D350 1                  | 0,14735974 |
| Neophoca cinerea NC008419 1              | Halichoerus grypus NC001602 2         | 0,14735983 |
| Hemigalus derbyanus MH464791 1           | Bdeogale nigripes GLC15 1             | 0,14736557 |
| Cystophora cristata NC008427 1           | Arctocepalus australis MG023139 1     | 0,14738685 |
| Phoca fasciata NC008428 1                | Arctocepalus australis MG023139 1     | 0,14739268 |
| Leopardus geoffroyi NC028320 1           | Chrotogale owstoni T607 1             | 0,14739378 |
| Viverricula indica NC025296 2            | Prionodon linsang ERR2391707 1        | 0,14739522 |
| Urva brachyura KY117547 1                | Cryptoprocta ferox CFC13 1            | 0,14739648 |
| Urocyon cinereoargenteus NC026723 21     | Chrysocyon brachyurus NC024172 1      | 0,14739726 |
| Fossa fossana D350 1                     | Felis silvestris lybica KP202275 4    | 0,14739811 |
| Paradoxurus hermaphroditus NC039591 1    | Caracal caracal NC028306 1            | 0,14739935 |
| Paguma larvata PDD511 2                  | Caracal caracal NC028306 1            | 0,14740051 |
| Lynx lynx NC027083 4                     | Galidictis fasciata DM333 1           | 0,14740245 |
| Prionailurus bengalensis CKM45 20        | Mungotictis decemlineata NC027828 1   | 0,14740738 |
| Monachus monachus NC044972 5             | Arctocepalus townsendi NC008420 1     | 0,14742284 |
| Otocolobus manu NC028323 1               | Chrotogale owstoni T607 1             | 0,14745571 |
| Profelis aurata NC028299 1               | Fossa fossana D350 1                  | 0,14746583 |
| Panthera pardus NC010641 5               | Civettictis civetta NC033378 1        | 0,14746608 |
| Paradoxurus hermaphroditus NLNC 1        | Caracal caracal NC028306 1            | 0,14746697 |
| Leopardus wiedii NC028318 1              | Urva semitorquata MH464789 1          | 0,14746758 |
| Leopardus wiedii NC028318 1              | Eupleres goudotii D128 1              | 0,14747071 |
| Prionailurus rubiginosus NC028304 2      | Galidictis fasciata DM333 1           | 0,14747204 |
| Paradoxurus hermaphroditus NC039591 1    | Leopardus colocolo NC028314 1         | 0,14748697 |
| Panthera pardus japonensis KJ866876 8    | Civettictis civetta NC033378 1        | 0,14750208 |
| Genetta genetta T297 1                   | Cynogale bennetti KY117544 1          | 0,14751644 |
| Homotherium latidens MF871702 3          | Diplogale hosei MH464790 1            | 0,14751984 |
| Leopardus geoffroyi NC028320 1           | Diplogale hosei MH464790 1            | 0,14752185 |
| Mungos mungo/gambianus SRR7704821 1      | Genetta abyssinica MG489822 1         | 0,14753237 |
| Prionailurus rubiginosus NC028304 2      | Helogale parvula SRR7637809 1         | 0,14753354 |
| Ommatophoca rossii AY377287etc 1         | Callorhinus ursinus NC008415 1        | 0,14753412 |
| Profelis aurata NC028299 1               | Paguma larvata PDD511 2               | 0,14753531 |
| Viverricula indica NC025296 2            | Panthera pardus japonensis KJ866876 8 | 0,14753872 |
| Leopardus geoffroyi NC028320 1           | Genetta genetta T297 1                | 0,14754507 |
| Leopardus colocolo NC028314 1            | Eupleres goudotii D128 1              | 0,14755276 |
| Urva javanica/auropunctata NC006835 1    | Eupleres goudotii D128 1              | 0,14755946 |
| Halichoerus grypus NC001602 2            | Arctocepalus pusillus NC008417 1      | 0,14756487 |
| Viverra zibetha T609 1                   | Panthera pardus NC010641 5            | 0,14756581 |
| Smilodon populator MF871700 1            | Genetta genetta T297 1                | 0,14756808 |
| Paguma larvata PDD511 2                  | Fossa fossana D350 1                  | 0,14759561 |
| Prionodon linsang ERR2391707 1           | Prionailurus bengalensis NC028301 12  | 0,14759591 |
| Viverra zibetha T609 1                   | Crossarchus platycephalus C7R66 1     | 0,14759706 |
| Mungos mungo MMCT 7                      | Civettictis civetta GLC19 1           | 0,14759754 |
| Pusa hispida NC 008433 1                 | Arctocepalus australis MG023139 1     | 0,14759956 |
| Paguma larvata PDD511 2                  | Felis chaus NC028307 1                | 0,14760272 |
| Viverra zibetha T609 1                   | Panthera pardus japonensis KJ866876 8 | 0,14760309 |
| Salanoia concolor D378 1                 | Felis silvestris lybica KP202275 4    | 0,14760543 |
| Mungos mungo MMCT 7                      | Hemigalus derbyanus MH464791 1        | 0,14760782 |
| Paguma larvata PDD511 2                  | Leopardus guigna NC028321 1           | 0,14760803 |
| Phocarcos hookeri NC008418 1             | Erigonathus barbatus NC008426 1       | 0,14764531 |
| Smilodon populator MF871700 1            | Prionodon pardicolor NC024569 2       | 0,14765522 |
| Nandinia binotata NC024567 1             | Bdeogale nigripes GLC15 1             | 0,14765689 |
| Pusa sibirica NC008432 2                 | Otaria byronia OTAB 1                 | 0,14765838 |
| Felis chaus NC028307 1                   | Chrotogale owstoni T607 1             | 0,1476604  |
| Prionodon linsang ERR2391707 1           | Paradoxurus jerdoni MH464793 1        | 0,14766292 |
| Urva semitorquata MH464789 1             | Civettictis civetta GLC19 1           | 0,14766474 |
| Prionailurus rubiginosus NC028304 2      | Urva semitorquata MH464789 1          | 0,14766808 |
| Genetta servalina NC024568 2             | Galidictis fasciata DM333 1           | 0,14766861 |
| Prionailurus rubiginosus NC028304 2      | Attilax paludinosus T606 1            | 0,14766891 |
| Prionailurus bengalensis CKM45 20        | Paradoxurus jerdoni MH464793 1        | 0,1476721  |
| Salanoia concolor D378 1                 | Puma yagouaroundi NC028311 1          | 0,14767423 |
| Prionailurus viverrinus NC028305 1       | Mungotictis decemlineata NC027828 1   | 0,14767663 |
| Lynx lynx NC027083 4                     | Cryptoprocta ferox CFC13 1            | 0,14767656 |
| Genetta abyssinica MG489822 1            | Galerella sanguinea T378 1            | 0,14768323 |
| Mungos mungo/gambianus SRR7704821 1      | Hemigalus derbyanus MH464791 1        | 0,14768752 |
| Paradoxurus hermaphroditus NC039591 1    | Homotherium latidens MF871702 3       | 0,14768879 |
| Civettictis civetta NC033378 1           | Bdeogale nigripes GLC15 1             | 0,14769574 |
| Pusa caspica NC008431 1                  | Bdeogale nigripes GLC15 1             | 0,14772345 |
| Leopardus jacobita NC028322 1            | Chrotogale owstoni T607 1             | 0,14772387 |
| Otaria byronia OTAB 1                    | Cystophora cristata NC008427 1        | 0,147726   |
| Viverricula indica KX891745 1            | Mungos mungo/gambianus SRR7704821 1   | 0,14773154 |
| Urva semitorquata MH464789 1             | Genetta servalina NC024568 2          | 0,14773174 |
| Lynx rufus NC014456 3                    | Crossarchus platycephalus C7R66 1     | 0,14773388 |
| Leopardus colocolo NC028314 1            | Diplogale hosei MH464790 1            | 0,14773466 |
| Salanoia concolor D378 1                 | Prionailurus bengalensis CKM45 20     | 0,14774442 |
| Urocyon cinereoargenteus NC026723 21     | Lycalopex sechurae KT448284 1         | 0,14776009 |
| Neophoca cinerea NC008419 1              | Monachus monachus NC044972 5          | 0,14776282 |
| Halichoerus grypus NC001602 2            | Arctocepalus gazella BK010918 1       | 0,14776565 |
| Urocyon littoralis catalinae KP129018 15 | Canis mesomelas KT448280 1            | 0,14776957 |
| Phocarcos hookeri NC008418 1             | Phoca fasciata NC008428 1             | 0,14779598 |
| Puma yagouaroundi NC028311 1             | Fossa fossana D350 1                  | 0,14780205 |
| Viverricula indica NC025296 2            | Bdeogale nigripes GLC15 1             | 0,14780258 |
| Mungotictis decemlineata NC027828 1      | Genetta servalina NC024568 2          | 0,14780271 |
| Profelis aurata NC028299 1               | Paradoxurus hermaphroditus NC039591 1 | 0,14780337 |
| Phoca vitulina NC001325 1                | Otaria byronia OTAB 1                 | 0,14780432 |
| Prionailurus bengalensis NC028301 12     | Eupleres goudotii D128 1              | 0,14780457 |
| Leopardus pardalis T262 1                | Attilax paludinosus T606 1            | 0,14780478 |
| Viverra zibetha T609 1                   | Panthera uncia KP202269 1             | 0,14780517 |
| Smilodon populator MF871700 1            | Crossarchus platycephalus C7R66 1     | 0,14780684 |
| Mungotictis decemlineata NC027828 1      | Leopardus tigrinus NC028317 1         | 0,14780955 |
| Viverricula indica KX891745 1            | Panthera onca NC022842 1              | 0,14781277 |
| Lynx canadensis NC028313 1               | Arctictis binturong T605 2            | 0,14781725 |
| Salanoia concolor D378 1                 | Acinonyx jubatus NC005212 3           | 0,14782362 |
| Leopardus pardalis NC028315 1            | Diplogale hosei MH464790 1            | 0,14783034 |
| Civettictis civetta NC033378 1           | Attilax paludinosus T606 1            | 0,14783192 |
| Galerella sanguinea T378 1               | Civettictis civetta NC033378 1        | 0,14784102 |
| Fossa fossana D350 1                     | Chrotogale owstoni T607 1             | 0,14785017 |
| Vulpes lagopus NC026529 3                | Speothos venaticus C48 2              | 0,14785568 |
| Nandinia binotata NC024567 1             | Mungos mungo/gambianus SRR7704821 1   | 0,14785887 |
| Viverra zibetha T609 1                   | Xenogale naso C07XAR110 1             | 0,14786601 |
| Paradoxurus hermaphroditus NC039591 1    | Leopardus wiedii NC028318 1           | 0,14786761 |
| Mungos mungo/gambianus SRR7704821 1      | Leopardus geoffroyi NC028320 1        | 0,14787172 |
| Parahaena brunnea NC038159 15            | Mungotictis decemlineata NC027828 1   | 0,14787361 |

|                                      |                                      |            |
|--------------------------------------|--------------------------------------|------------|
| Panthera onca NC022842 1             | Melogale moschata KP276273 1         | 0,18511599 |
| Civettictis civetta NC033378 1       | Canis mesomelas KT448280 1           | 0,18511713 |
| Otocolobus manu NC028323 1           | Arctodus simus NC011116 1            | 0,18511726 |
| Speothos venaticus C48 2             | Leopardus wiedii NC028318 1          | 0,18511763 |
| Ursus arctos pruinosus MG066703 3    | Aonyx cinerea NC035814 2             | 0,18511838 |
| Ursus arctos AP012576 6              | Arctocepalus forsteri KT693377 17    | 0,18511991 |
| Lycyon pictus NC028427 2             | Genetta genetta T297 1               | 0,18512097 |
| Zalophus wolfebaeki SRR4431565 1     | Felis catus NC001700 2               | 0,18512191 |
| Panthera onca NC022842 1             | Aonyx cinerea NC035814 2             | 0,18512195 |
| Ursus maritimus NC003428 31          | Leopardus geoffroyi NC028320 1       | 0,18512213 |
| Panthera uncia KP202269 1            | Canis aureus KT448274 1              | 0,18512261 |
| Ursus thibetanus laniger MH281753 2  | Aonyx cinerea NC035814 2             | 0,18512277 |
| Vulpes corsac NC023958 1             | Leopardus colocolo NC028314 1        | 0,18512425 |
| Speothos venaticus C48 2             | Hemigalus derbyanus MH464791 1       | 0,18512693 |
| Ursus arctos isabellinus 1885 2      | Arctictis binturong T605 2           | 0,18512829 |
| Mustela nivalis T306 5               | Melurus ursinus NC009970 2           | 0,18512908 |
| Ursus spelaeus NC011112 8            | Felis catus NC001700 2               | 0,18512999 |
| Galictis vittata T412 1              | Catopuma badia NC028300 1            | 0,18513136 |
| Ursus spelaeus NC011112 8            | Puma concolor NC016470 22            | 0,18513167 |
| Zalophus californianus NC008416 1    | Felis catus NC001700 2               | 0,18513262 |
| Leopardus guigna NC028321 1          | Chrysocyon brachyurus NC024172 1     | 0,18513751 |
| Ursus thibetanus formosanus NC00933  | Ictonyx striatus T299 1              | 0,18513834 |
| Salanoia concolor D378 1             | Martes flavigula NC012141 3          | 0,18514508 |
| Ursus maritimus NC003428 31          | Smilodon populator MF871700 1        | 0,18515015 |
| Leopardus colocolo NC028314 1        | Helarctos malayanus NC009968 2       | 0,18515031 |
| Cystophora cristata NC008427 1       | Tapirus terrestris T358              | 0,18515246 |
| Viverricula indica KX891745 1        | Tapirus terrestris T358              | 0,18515339 |
| Mustela sibirica AP017394 11         | Canis mesomelas KT448280 1           | 0,18515378 |
| Enhydra lutris NC009692 1            | Attilax paludinosus T606 1           | 0,18515587 |
| Ursus arctos GU573491 207            | Gulo gulo NC009685 3                 | 0,18515754 |
| Martes americana NC020642 1          | Chrotogale owstoni T607 1            | 0,18515943 |
| Vulpes vulpes NC008434 5             | Fossa fossana D350 1                 | 0,18516101 |
| Nyctereutes procyonoides NC013700 3  | Helogale parvula SRR7637809 1        | 0,18516181 |
| Conepatus chinga NC042596 1          | Arctocepalus gazella BK010918 1      | 0,18516321 |
| Vulpes vulpes NC008434 5             | Salanoia concolor D378 1             | 0,18516409 |
| Prionailurus rubiginosus NC028304 2  | Conepatus chinga NC042596 1          | 0,18516453 |
| Leopardus pardalis NC028315 1        | Ailurus fulgens NC011124 1           | 0,18516725 |
| Leopardus guigna NC028321 1          | Tapirus terrestris T358              | 0,18516952 |
| Lutra sumatrana NC035810 1           | Cryptoprocta ferox CFC13 1           | 0,18516962 |
| Prionodon linsang ERR2391707 1       | Phoca groenlandica NC008429 54       | 0,18516971 |
| Vulpes ferrillata NC027935 1         | Genetta servalina NC024568 2         | 0,18517075 |
| Parahaena brunnea NC038159 15        | Lutra lutra LC050126 1               | 0,18517125 |
| Mustela frenata NC020640 1           | Hyaena hyaena NC020669 1             | 0,18517159 |
| Galerella sanguinea T378 1           | Aonyx cinerea NC035814 2             | 0,18517187 |
| Otocyon megalotis SAF1 2             | Mustela frenata NC020640 1           | 0,18517233 |
| Martes pennanti NC020664 16          | Canis latrans NC008093 7             | 0,18517257 |
| Lutra sumatrana NC035810 1           | Felis chaus NC028307 1               | 0,18517266 |
| Paradoxurus hermaphroditus NLNC 1    | Melogale moschata NC020644 1         | 0,18517275 |
| Caracal caracal NC028306 1           | Arctocepalus australis MG023139 1    | 0,18517312 |
| Prionailurus bengalensis NC028301 12 | Arctocepalus forsteri KT693377 17    | 0,18517326 |
| Otocolobus manu NC028323 1           | Arctocepalus gazella BK010918 1      | 0,18517406 |
| Ursus thibetanus thibetanus NC011118 | Conepatus chinga NC042596 1          | 0,18517427 |
| Vulpes ferrillata NC027935 1         | Leptailurus serval NC028316 1        | 0,18517441 |
| Civettictis civetta GLC19 1          | Aonyx cinerea NC035814 2             | 0,18517473 |
| Vulpes zerdia KJ603240 1             | Leopardus jacobita NC028322 1        | 0,18517563 |
| Prionailurus planiceps KY682741 4    | Phocarcos hookeri NC008418 1         | 0,18517628 |
| Prionailurus planiceps NC028312 6    | Neophoca cinerea NC008419 1          | 0,18517658 |
| Zalophus wolfebaeki SRR4431565 1     | Salanoia concolor D378 1             | 0,18517663 |
| Vulpes ferrillata NC027935 1         | Catopuma temminckii NC027115 41      | 0,18517664 |
| Paguma larvata PDD511 2              | Arctocepalus pusillus NC008417 1     | 0,18517794 |
| Neophoca cinerea NC008419 1          | Arctocepalus tigrinus NC028317 1     | 0,18517801 |
| Chrotogale owstoni T607 1            | Arctocepalus forsteri NC004023 28    | 0,18517803 |
| Zalophus wolfebaeki SRR4431565 1     | Bdeogale nigripes GLC15 1            | 0,18517825 |
| Fossa fossana D350 1                 | Chrysocyon brachyurus NC024172 1     | 0,18517841 |
| Viverra tangalunga MH464792 1        | Ursus maritimus NC003428 31          | 0,18517849 |
| Ursus thibetanus mupinensis NC00875  | Procyon lotor AB462046 3             | 0,18517919 |
| Ursus maritimus NC003428 31          | Bassariscus sumichrasti SRX1099089 1 | 0,18517922 |
| Ursus arctos EU497665 29             | Bassariscus sumichrasti SRX1099089 1 | 0,18517926 |
| Ursus maritimus NC003428 31          | Aonyx cinerea NC035814 2             | 0,18517961 |
| Ursus arctos EU497665 29             | Aonyx cinerea NC035814 2             | 0,18517962 |
| Panthera tigris amoyensis NC014770 2 | Mustela frenata NC020640 1           | 0,18517986 |
| Pardofelis marmorata NLN3 2          | Melogale moschata NC020644 1         | 0,18518002 |
| Procyon lotor AB462049 4             | Leptailurus serval NC028316 1        | 0,18518035 |
| Prionailurus bengalensis NC028301 12 | Lutrogale perspicillata NC035811 1   | 0,18518119 |
| Melogale moschata NC020644 1         | Chrysocyon brachyurus NC024172 1     | 0,18518393 |
| Ursus thibetanus formosanus NC00933  | Crossarchus platycephalus C7R66 1    | 0,18518451 |
| Prionailurus bengalensis CKM45 20    | Aonyx cinerea NC035814 2             | 0,18518463 |
| Poecilogale albinocha T602 1         | Leopardus guigna NC028321 1          | 0,18518512 |
| Chrysocyon brachyurus NC024172 1     | Ailurus fulgens styani NC009691 1    | 0,18518537 |
| Ursus thibetanus mupinensis NC00875  | Prionailurus planiceps NC028312 6    | 0,18518704 |
| Ursus arctos AP012576 6              | Arctocepalus australis MG023139 1    | 0,18518728 |
| Profelis aurata NC028299 1           | Martes foina NC020643 1              | 0,18518756 |
| Vulpes lagopus NC026529 3            | Acinonyx jubatus NC005212 3          | 0,18518983 |
| Zalophus wolfebaeki SRR4431565 1     | Puma yagouaroundi NC028311 1         | 0,18519022 |
| Melurus ursinus NC009970 2           | Melogale moschata NC020644 1         | 0,18519206 |
| Ursus spelaeus NC011112 8            | Phocarcos hookeri NC008418 1         | 0,18519248 |
| Ursus arctos GU573491 207            | Martes foina NC020643 1              | 0,18519276 |
| Ursus thibetanus formosanus NC00933  | Paguma larvata PDD511 2              | 0,18519332 |
| Ursus spelaeus EU327344 13           | Lynx pardinus NC028319 161           | 0,18519349 |
| Lutra lutra LC050126 1               | Canis lupus chanco NC010340 4        | 0,18519357 |
| Ursus spelaeus EU327344 13           | Felis silvestris lybica KP202275 4   | 0,18519358 |
| Ichneumia albicauda T603 1           | Helarctos malayanus NC009968 2       | 0,18519519 |
| Martes foina NC020643 1              | Arctictis binturong T605 2           | 0,18519618 |
| Leopardus wiedii NC028318 1          | Helarctos malayanus NC009968 2       | 0,18519835 |
| Ursus spelaeus NC011112 8            | Leopardus tigrinus NC028317 1        | 0,18519862 |
| Lycalopex sechurae KT448284 1        | Civettictis civetta GLC19 1          | 0,18519962 |
| Mustela nivalis T306 5               | Arctocepalus forsteri NC004023 28    | 0,18520199 |
| Speothos venaticus C48 2             | Acinonyx jubatus NC005212 3          | 0,18520222 |
| Helarctos malayanus NC009968 2       | Canis aureus KT448274 1              | 0,18520247 |
| Ursus americanus JX196366 3          | Martes pennanti NC020664 16          | 0,18520536 |
| Panthera pardus NC010641 5           | Enhydra lutris NC009692 1            | 0,18521154 |
| Ursus americanus JX196366 3          | Mustela sibirica AP017394 11         | 0,18521206 |
| Martes flavigula NC012141 3          | Caracal caracal NC028306 1           | 0,18521425 |

|                                          |                                       |            |
|------------------------------------------|---------------------------------------|------------|
| Genetta genetta T297 1                   | Felis catus NC001700 2                | 0,14787397 |
| Leopardus pardalis NC028315 1            | Eupleres goudotii D128 1              | 0,14787473 |
| Viverra zibetha T609 1                   | Panthera tigris amoyensis NC014770 2  | 0,14787816 |
| Viverricula indica NC025296 2            | Ichneumia albicauda T603 1            | 0,14787966 |
| Viverricula indica NC025296 2            | Panthera pardus NC010641 5            | 0,14790572 |
| Urva javanica T413 1                     | Galidia elegans D146 1                | 0,14792962 |
| Speothos venaticus C48 2                 | Otocyon megalotis SAF1 2              | 0,14793015 |
| Helogale parvula SRR7637809 1            | Civettictis civetta GLC19 1           | 0,14793423 |
| Crossarchus platycephalus C7R66 1        | Catopuma badia NC028300 1             | 0,14793457 |
| Monachus schauinslandi NC008421 1        | Arctocepalus forsteri KT693377 17     | 0,14793481 |
| Suricata suricatta SSM10 1               | Cryptoprocta ferox FC13 1             | 0,14793487 |
| Pusa hispida NC 008433 1                 | Arctocepalus townsendi NC008420 1     | 0,14793597 |
| Prionailurus bengalensis NC028301 12     | Crossarchus platycephalus C7R66 1     | 0,14793736 |
| Prionailurus bengalensis NC028301 12     | Helogale parvula SRR7637809 1         | 0,14793761 |
| Prionailurus rubiginosus NC028304 2      | Paradoxurus jerdoni MH464793 1        | 0,14793786 |
| Lynx rufus NC014456 3                    | Galidictis fasciata DM333 1           | 0,14794226 |
| Prionodon pardicolor NC024569 2          | Lynx rufus NC014456 3                 | 0,14794807 |
| Leopardus tigrinus NC028317 1            | Diplogale hosei MH464790 1            | 0,14796215 |
| Urocyon littoralis catalinae KP129018 15 | Lycalopex sechurae KT448284 1         | 0,14796257 |
| Leopardus pardalis T262 1                | Diplogale hosei MH464790 1            | 0,14796972 |
| Pusa caspica NC008431 1                  | Arctocepalus forsteri KT693377 17     | 0,14799349 |
| Pusa sibirica NC008432 2                 | Arctocepalus gazella BK010918 1       | 0,14799434 |
| Profelis aurata NC028299 1               | Chrotogale owstoni T607 1             | 0,14799514 |
| Prionodon linsang ERR2391707 1           | Prionailurus rubiginosus NC028304 2   | 0,14799981 |
| Mungos mungo/gambianus SRR7704821 1      | Civettictis civetta GLC19 1           | 0,14800146 |
| Phocarcos hookeri NC008418 1             | Phoca largha NC008430 1               | 0,14800207 |
| Puma concolor NC016470 22                | Paradoxurus hermaphroditus NLNC 1     | 0,14800529 |
| Viverricula indica NC025296 2            | Mungos mungo/gambianus SRR7704821 1   | 0,14800553 |
| Paradoxurus hermaphroditus NLNC 1        | Otocolobus manul NC028323 1           | 0,14800583 |
| Phoca vitulina NC001325 1                | Arctocepalus pusillus NC008417 1      | 0,14800772 |
| Prionailurus bengalensis CKM45 20        | Paradoxurus hermaphroditus NC039591 1 | 0,14800827 |
| Viverricula indica NC025296 2            | Mungotictis decemlineata NC027828 1   | 0,14800969 |
| Mungos mungo MMC7 1                      | Leopardus colocolo NC028314 1         | 0,14801934 |
| Salanoia concolor D378 1                 | Leopardus colocolo NC028314 1         | 0,14802343 |
| Pusa caspica NC008431 1                  | Phocarcos hookeri NC008418 1          | 0,14805889 |
| Cystophora cristata NC008427 1           | Arctocepalus forsteri KT693377 17     | 0,14806011 |
| Felis silvestris lybica KP202275 4       | Diplogale hosei MH464790 1            | 0,14806266 |
| Urocyon littoralis catalinae KP129018 15 | Chrysoyon brachyurus NC024172 1       | 0,14807063 |
| Phoca largha NC008430 1                  | Arctocepalus gazella BK010918 1       | 0,14807242 |
| Mungos mungo MMC7 1                      | Leopardus pardalis NC028315 1         | 0,14807278 |
| Paguma larvata PDD511 2                  | Felis silvestris lybica KP202275 4    | 0,14807342 |
| Monachus monachus NC044972 5             | Arctocepalus forsteri KT693377 17     | 0,14809698 |
| Panthera leo NERO 19                     | Genetta servalina NC024568 2          | 0,14810477 |
| Pusa sibirica NC008432 2                 | Arctocepalus forsteri KT693377 17     | 0,14812823 |
| Smilodon populator MF871700 1            | Paradoxurus hermaphroditus NC039591 1 | 0,14812848 |
| Chrotogale owstoni T607 1                | Catopuma temminckii NC027115 41       | 0,14813526 |
| Mirounga angustirostris SRR10331586 1    | Arctocepalus australis MG023139 1     | 0,14813555 |
| Phoca groenlandica NC008429 54           | Arctocepalus pusillus NC008417 1      | 0,14813836 |
| Prionailurus planiceps NC028312 6        | Attilax paludinosus T606 1            | 0,14813979 |
| Mungos mungo MMC7 1                      | Leopardus pardalis T262 1             | 0,14814004 |
| Paguma larvata PDD511 2                  | Felis margarita NC028308 1            | 0,14814091 |
| Salanoia concolor D378 1                 | Leopardus tigrinus NC028317 1         | 0,14814712 |
| Ichneumia albicauda T603 1               | Genetta abyssinica MG489822 1         | 0,14815438 |
| Paradoxurus jerdoni MH464793 1           | Leopardus colocolo NC028314 1         | 0,14815608 |
| Otaria byronia OTAB 1                    | Monachus monachus NC044972 5          | 0,14817517 |
| Leopardus guigna NC028321 1              | Chrotogale owstoni T607 1             | 0,14820151 |
| Civettictis civetta GLC19 1              | Attilax paludinosus T606 1            | 0,14820327 |
| Leopardus guigna NC028321 1              | Fossa fossana D350 1                  | 0,14820734 |
| Viverra zibetha T609 1                   | Galidictis fasciata DM333 1           | 0,14820762 |
| Parahyaena brunnea NC038159 15           | Mungos mungo/gambianus SRR7704821 1   | 0,14821035 |
| Prionailurus bengalensis CKM45 20        | Eupleres goudotii D128 1              | 0,14821155 |
| Viverra zibetha T609 1                   | Panthera tigris NC010642 35           | 0,14821494 |
| Prionodon pardicolor NC024569 2          | Felis chaus NC028307 1                | 0,14822179 |
| Prionodon pardicolor NC024569 2          | Prionailurus bengalensis CKM45 20     | 0,14822212 |
| Helogale parvula SRR7637809 1            | Civettictis civetta NC033378 1        | 0,14823948 |
| Phoca fasciata NC008428 1                | Arctocepalus forsteri NC004023 28     | 0,14826266 |
| Pusa caspica NC008431 1                  | Arctocepalus australis MG023139 1     | 0,14826275 |
| Phoca groenlandica NC008429 54           | Arctocepalus forsteri KT693377 17     | 0,14826792 |
| Prionodon linsang ERR2391707 1           | Leptailurus serval NC028316 1         | 0,14826943 |
| Viverricula indica KX891745 1            | Cynictis penicillata T375 1           | 0,14826982 |
| Paradoxurus jerdoni MH464793 1           | Leopardus wiedii NC028318 1           | 0,14827219 |
| Viverricula indica NC025296 2            | Salanoia concolor D378 1              | 0,14827968 |
| Leopardus pardalis NC028315 1            | Galidictis fasciata DM333 1           | 0,14828248 |
| Salanoia concolor D378 1                 | Prionailurus viverrinus NC028305 1    | 0,14828289 |
| Zalophus californianus NC008416 1        | Ommatophoca rossii AY377287etc 1      | 0,14829901 |
| Phocarcos hookeri NC008418 1             | Halichoerus grypus NC001602 2         | 0,14830185 |
| Prionailurus planiceps NC028312 6        | Urva semitorquata MH464789 1          | 0,14834009 |
| Paguma larvata PDD511 2                  | Lynx canadensis NC028313 1            | 0,14834197 |
| Paradoxurus hermaphroditus NC039591 1    | Otocolobus manul NC028323 1           | 0,14834213 |
| Mungos mungo/gambianus SRR7704821 1      | Leopardus pardalis T262 1             | 0,14834326 |
| Mungos mungo/gambianus SRR7704821 1      | Leopardus guigna NC028321 1           | 0,14834324 |
| Prionailurus bengalensis CKM45 20        | Urva semitorquata MH464789 1          | 0,14834476 |
| Salanoia concolor D378 1                 | Parahyaena brunnea NC038159 15        | 0,14834532 |
| Viverricula indica NC025296 2            | Panthera uncia KP202269 1             | 0,14834684 |
| Viverricula indica KX891745 1            | Ichneumia albicauda T603 1            | 0,14834704 |
| Prionodon pardicolor NC024569 2          | Lynx pardus NC028319 161              | 0,14835225 |
| Panthera onca KP202264 2                 | Genetta abyssinica MG489822 1         | 0,14835617 |
| Vulpes zerdia KJ603240 1                 | Urocyon cinereoargenteus NC026723 21  | 0,14838754 |
| Prionodon pardicolor NC024569 2          | Homotherium latidens MF871702 3       | 0,14839013 |
| Zalophus wolfebaeki SRR4431565 1         | Ommatophoca rossii AY377287etc 1      | 0,14839156 |
| Pusa sibirica NC008432 2                 | Arctocepalus australis MG023139 1     | 0,14839742 |
| Nandinia binotata NC024567 1             | Urva javanica T413 1                  | 0,14839752 |
| Phoca fasciata NC008428 1                | Arctocepalus townsendi NC008420 1     | 0,14840165 |
| Viverricula indica KX891745 1            | Urva semitorquata MH464789 1          | 0,14840457 |
| Genetta servalina NC024568 2             | Bdeogale nigripes GLC15 1             | 0,14840927 |
| Phoca vitulina NC001325 1                | Neophoca cinerea NC008419 1           | 0,14840771 |
| Urva semitorquata MH464789 1             | Caracal caracal NC028306 1            | 0,14840914 |
| Puma yagouaroundi NC028311 1             | Paradoxurus hermaphroditus NLNC 1     | 0,14840959 |
| Parahyaena brunnea NC038159 15           | Galidia elegans D146 1                | 0,14841135 |
| Parahyaena brunnea NC038159 15           | Urva semitorquata MH464789 1          | 0,14841184 |
| Prionailurus bengalensis CKM45 20        | Helogale parvula SRR7637809 1         | 0,14841224 |
| Leopardus tigrinus NC028317 1            | Genetta genetta T297 1                | 0,14841239 |
| Prionailurus bengalensis CKM45 20        | Attilax paludinosus T606 1            | 0,14841288 |

|                                      |                                       |            |
|--------------------------------------|---------------------------------------|------------|
| Ursus americanus JX196366 3          | Catopuma badia NC028300 1             | 0,18522042 |
| Meles anakuma NC009677 1             | Arctocepalus gazella BK010918 1       | 0,18522124 |
| Mustela frenata NC020640 1           | Cynogale bennetti KY117544 1          | 0,18522148 |
| Smilodon populator MF871700 1        | Arctocepalus pusillus NC008417 1      | 0,18522424 |
| Ursus americanus JX196366 3          | Caracal caracal NC028306 1            | 0,18522464 |
| Mustela putorius NC020638 4          | Arctocepalus australis MG023139 1     | 0,18522477 |
| Phoca fasciata NC008428 1            | Tapirus terrestris T358               | 0,18522488 |
| Fossa fossana D350 1                 | Aillurus fulgens styani NC009691 1    | 0,18522778 |
| Vulpes zerdia KJ603240 1             | Fossa fossana D350 1                  | 0,18523011 |
| Mungos mungo/gambianus SRR7704821 1  | Martes pennanti NC020664 16           | 0,18523158 |
| Vulpes corsac NC023958 1             | Viverra tangalunga MH464792 1         | 0,18523252 |
| Profelis aurata NC028299 1           | Enhydra lutris NC009692 1             | 0,18523352 |
| Lutra lutra NC011358 9               | Caracal caracal NC028306 1            | 0,18523364 |
| Lutra lutra NC011358 9               | Felis chaus NC028307 1                | 0,185234   |
| Prionailurus planiceps KY682741 4    | Aillurus fulgens NC011124 1           | 0,1852369  |
| Mustela kathiah NC023210 1           | Hyaena hyaena NC020669 1              | 0,18523695 |
| Prionodon pardicolor NC024569 2      | Martes americana NC020642 1           | 0,18523782 |
| Prionodon pardicolor NC024569 2      | Martes zibellina NC011579 39          | 0,18523787 |
| Ursus maritimus NC003428 31          | Fossa fossana D350 1                  | 0,18523929 |
| Ursus arctos pruinus MG066703 3      | Enhydra lutris NC009692 1             | 0,18523993 |
| Mustela nigripes NC024942 1          | Ichneumia albicauda T603 1            | 0,18524049 |
| Vulpes vulpes NC008434 5             | Pardofelis marmorata NLN3 2           | 0,18524063 |
| Vulpes ferrilata NC027935 1          | Lynx pardus NC028319 161              | 0,18524092 |
| Vulpes corsac NC023958 1             | Prionailurus planiceps KY682741 4     | 0,18524104 |
| Prionailurus rubiginosus NC028304 2  | Arctocepalus gazella BK010918 1       | 0,18524134 |
| Canis aureus KT448274 1              | Bdeogale nigripes GLC15 1             | 0,18524137 |
| Leopardus wiedii NC028318 1          | Arctocepalus townsendi NC008420 1     | 0,18524191 |
| Profelis aurata NC028299 1           | Martes americana NC020642 1           | 0,18524204 |
| Ursus thibetanus mupinensis NC008795 | Mungotictis decemlineata NC027828 1   | 0,18524218 |
| Lynx rufus NC014456 3                | Arctocepalus gazella BK010918 1       | 0,18524233 |
| Tremarctos ornatus NC009969 2        | Paguma larvata PDD511 2               | 0,18524361 |
| Vulpes ferrilata NC027935 1          | Mirounga angustirostris SRR10331586 1 | 0,18524383 |
| Viverricula indica KX891751 1        | Martes martes T302 3                  | 0,18524392 |
| Prionailurus bengalensis CKM45 20    | Arctocepalus forsteri KT693377 17     | 0,18524437 |
| Pardofelis marmorata NLN3 2          | Arctocepalus pusillus NC008417 1      | 0,18524563 |
| Speothos venaticus C48 2             | Mustela erminea T305 2                | 0,18524568 |
| Neophoca cinerea NC008419 1          | Leopardus geoffroyi NC028320 1        | 0,18524583 |
| Puma concolor NC016470 22            | Arctocepalus pusillus NC008417 1      | 0,18524677 |
| Lynx canadensis NC028313 1           | Arctotherium sp NC030174 1            | 0,18524726 |
| Arctocepalus gazella BK010918 1      | Ailuropoda melanoleuca NC009492 5     | 0,18524763 |
| Prionailurus viverrinus NC028305 1   | Arctocepalus pusillus NC008417 1      | 0,18524899 |
| Mephitis mephitis NC020648 1         | Martes melampus NC009678 1            | 0,18524963 |
| Otocyon megalotis SAF1 2             | Lynx pardus NC028319 161              | 0,18525015 |
| Ursus arctos pruinus MG066703 3      | Neophoca cinerea NC008419 1           | 0,18525049 |
| Ursus arctos pruinus MG066703 3      | Mustela nivalis T306 5                | 0,18525094 |
| Speothos venaticus C48 2             | Arctocepalus pardalis NC028315 1      | 0,18525212 |
| Martes foina NC020643 1              | Cryptoprocta ferox FC13 1             | 0,18525252 |
| Taxidea taxus NC020646 1             | Panthera tigris amoyensis NC014770 2  | 0,18525349 |
| Ursus maritimus GU573488 Svalbard    | Martes foina NC020643 1               | 0,1852539  |
| Martes flavigula NC012141 3          | Canis mesomelas KT448280 1            | 0,18525393 |
| Ursus arctos AP012576 6              | Arctocepalus townsendi NC008420 1     | 0,18525405 |
| Ursus thibetanus mupinensis NC008795 | Paradoxurus jerdoni MH464793 1        | 0,18525416 |
| Speothos venaticus C48 2             | Prionailurus rubiginosus NC028304 2   | 0,1852548  |
| Prionailurus bengalensis CKM45 20    | Otaria byronia OTAB 1                 | 0,18525498 |
| Lutra lutra LC050126 1               | Urva javanica/auropunctata NC006835   | 0,18525542 |
| Zalophus wolfebaeki SRR4431565 1     | Ursus arctos pruinus MG066703 3       | 0,18525644 |
| Zalophus wolfebaeki SRR4431565 1     | Felis nigripes NC028309 1             | 0,18525654 |
| Chrysoyon brachyurus NC024172 1      | Arctotherium sp NC030174 1            | 0,18525666 |
| Melurus ursinus NC009970 2           | Aillurus fulgens NC011124 1           | 0,18525767 |
| Melurus ursinus NC009970 2           | Aillurus fulgens styani NC009691 1    | 0,18525782 |
| Mustela itatai NC034330 19           | Ailuropoda melanoleuca NC009492 5     | 0,18525881 |
| Ursus thibetanus formosanus NC00993  | Lynx lynx NC027083 4                  | 0,18526196 |
| Ursus thibetanus laniger MH281753 2  | Lynx canadensis NC028313 1            | 0,18526278 |
| Galerella sanguinea T378 1           | Canis lupus familiaris NC002008 1231  | 0,1852631  |
| Ursus spelaeus NC011112 8            | Lynx rufus NC014456 3                 | 0,18526451 |
| Ursus thibetanus laniger MH281753 2  | Leptailurus serval NC028316 1         | 0,18526734 |
| Ursus thibetanus formosanus NC00993  | Prionailurus bengalensis CKM45 20     | 0,18526742 |
| Zalophus californianus NC008416 1    | Pardofelis marmorata NLN3 2           | 0,18527138 |
| Zalophus californianus NC008416 1    | Ailuropoda melanoleuca NC009492 5     | 0,18527557 |
| Ursus spelaeus EU327344 13           | Leopardus colocolo NC028314 1         | 0,18527904 |
| Ichneumia albicauda T603 1           | Gulo gulo NC009685 3                  | 0,18528007 |
| Leopardus pardalis T262 1            | Arctocepalus forsteri NC004023 28     | 0,18528025 |
| Leopardus colocolo NC028314 1        | Galictis vittata T412 1               | 0,18528137 |
| Ursus americanus JX196366 3          | Leopardus pardalis T262 1             | 0,18528265 |
| Viverra tangalunga MH464792 1        | Cuon alpinus NC013445 3               | 0,18528365 |
| Martes flavigula NC012141 3          | Felis chaus NC028307 1                | 0,1852839  |
| Urva javanica/auropunctata NC006835  | Canis aureus KT448274 1               | 0,18528485 |
| Otocolobus manul NC028323 1          | Cuon alpinus NC013445 3               | 0,18528651 |
| Ursus thibetanus mupinensis NC008795 | Spilogale putorius NC010497 1         | 0,18528754 |
| Martes americana NC020642 1          | Urva semitorquata MH464789 1          | 0,18529236 |
| Mungos mungo MMC7 1                  | Martes zibellina NC011579 39          | 0,18529323 |
| Otocyon megalotis SAF1 2             | Martes flavigula NC012141 3           | 0,18529338 |
| Lontra canadensis SRR10409165 1      | Arctocepalus townsendi NC008420 1     | 0,18529354 |
| Lutra lutra NC011358 9               | Galidia elegans D146 1                | 0,18529378 |
| Ursus thibetanus thibetanus NC011112 | Spilogale putorius NC010497 1         | 0,18529411 |
| Mustela putorius NC020638 4          | Cynictis penicillata T375 1           | 0,18529478 |
| Prionailurus bengalensis CKM45 20    | Cuon alpinus NC013445 3               | 0,18529485 |
| Ursus arctos isabellinus 1885 2      | Smilodon populator MF871700 1         | 0,18529692 |
| Leopardus wiedii NC028318 1          | Conepatus chinga NC042596 1           | 0,18529753 |
| Procyon lotor AB462046 3             | Phocarcos hookeri NC008418 1          | 0,18529861 |
| Procyon lotor AB462046 3             | Mungos mungo MMC7 1                   | 0,18529882 |
| Vulpes lagopus NC026529 3            | Galidictis fasciata DM333 1           | 0,18529904 |
| Paguma larvata PDD511 2              | Lutra sumatrana NC035810 1            | 0,18529941 |
| Mungos mungo MMC7 1                  | Aonyx cinerea NC035814 2              | 0,1853005  |
| Mustela nivalis T306 5               | Arctocepalus forsteri KT693377 17     | 0,18530256 |
| Hyaena hyaena NC020669 1             | Enhydra lutris NC009692 1             | 0,18530287 |
| Mustela nivalis T306 5               | Urva semitorquata MH464789 1          | 0,18530376 |
| Taxidea taxus NC020646 1             | Canis anthus NC027956 2               | 0,18530481 |
| Parahyaena brunnea NC038159 15       | Lutra lutra NC011358 9                | 0,18530566 |
| Neovison vison NC020641 3            | Bdeogale nigripes GLC15 1             | 0,18530579 |
| Ursus arctos EU497665 29             | Arctocepalus forsteri KT693377 17     | 0,18530607 |
| Mungos mungo MMC7 1                  | Arctodus simus NC011116 1             | 0,18530631 |
| Vulpes corsac NC023958 1             | Lynx pardus NC028319 161              | 0,18530799 |

|                                       |                                          |            |
|---------------------------------------|------------------------------------------|------------|
| Puma yagouaroundi NC028311 1          | Mungotictis decemlineata NC027828 1      | 0,14841463 |
| Neofelis nebulosa NC008450 3          | Nandinia binotata NC024567 1             | 0,1484372  |
| Leopardus wiedii NC028318 1           | Diplogale hoesi MH464790 1               | 0,14844979 |
| Monachus schauinslandi NC008421 1     | Arctocepalus townsendi NC008420 1        | 0,1484731  |
| Phocarcos hookeri NC008418 1          | Phoca vitulina NC001325 1                | 0,14847364 |
| Paradoxurus hermaphroditus NLNC 1     | Leopardus tigrinus NC028317 1            | 0,14847466 |
| Viverricula indica NC025296 2         | Cynictis penicillata T375 1              | 0,14847565 |
| Prionailurus viverrinus NC028305 1    | Attilax paludinosus T606 1               | 0,14847901 |
| Prionailurus viverrinus NC028305 1    | Crossarchus platycephalus C7R66 1        | 0,14847903 |
| Salanoia concolor D378 1              | Panthera pardus japonensis KJ866876 8    | 0,14848058 |
| Leopardus wiedii NC028318 1           | Galidia elegans D146 1                   | 0,14848323 |
| Prionodon pardicolor NC024569 2       | Felis silvestris lybica KP202275 4       | 0,14848678 |
| Prionodon pardicolor NC024569 2       | Felis nigripes NC028309 1                | 0,14848724 |
| Prionodon pardicolor NC024569 2       | Felis margarita NC028308 1               | 0,14848728 |
| Prionodon pardicolor NC024569 2       | Otocolobus manul NC028323 1              | 0,14848892 |
| Monachus monachus NC044972 5          | Arctocepalus forsteri NC004023 28        | 0,14849417 |
| Eupleres goudotii D128 1              | Civettictis civetta NC033378 1           | 0,14850047 |
| Prionailurus rubiginosus NC028304 2   | Diplogale hoesi MH464790 1               | 0,14851657 |
| Felis margarita NC028308 1            | Diplogale hoesi MH464790 1               | 0,14852847 |
| Cystophora cristata NC008427 1        | Arctocepalus pusillus NC008417 1         | 0,14853539 |
| Viverricula indica XK891751 1         | Mungos mungo/gambianus SRR7704821 1      | 0,14853945 |
| Prionailurus planiceps KY682741 4     | Crossarchus platycephalus C7R66 1        | 0,14854282 |
| Panthera onca KP202264 2              | Fossa fossana D350 1                     | 0,14854328 |
| Leopardus pardalis T262 1             | Ura semitorquata MH464789 1              | 0,14854488 |
| Crossarchus platycephalus C7R66 1     | Crocota crocata NC020670 3               | 0,14854878 |
| Homotherium latidens MF871702 3       | Cynogale bennetti KY117544 1             | 0,1485493  |
| Salanoia concolor D378 1              | Leopardus geoffroyi NC028320 1           | 0,14854977 |
| Prionailurus bengalensis NC028301 12  | Galidictis fasciata DM333 1              | 0,14854978 |
| Leopardus guigna NC028321 1           | Genetta genetta T297 1                   | 0,14855087 |
| Lynx rufus NC014456 3                 | Cryptoprocta ferox CF13 1                | 0,14855251 |
| Leopardus colocolo NC028314 1         | Ura semitorquata MH464789 1              | 0,14855739 |
| Prionodon pardicolor NC024569 2       | Catopuma temminckii NC027115 41          | 0,14855897 |
| Pusa sibirica NC008432 2              | Arctocepalus townsendi NC008420 1        | 0,14859886 |
| Cryptoprocta ferox CFC13 1            | Civettictis civetta GLC19 1              | 0,14860952 |
| Viverricula indica XK891745 1         | Mungotictis decemlineata NC027828 1      | 0,14861071 |
| Lynx lynx NC027083 4                  | Eupleres goudotii D128 1                 | 0,14861149 |
| Prionailurus planiceps NC028312 6     | Eupleres goudotii D128 1                 | 0,14861235 |
| Mungotictis decemlineata NC027828 1   | Catopuma temminckii NC027115 41          | 0,14861347 |
| Leopardus jacobita NC028322 1         | Crossarchus platycephalus C7R66 1        | 0,14861354 |
| Pardofelis marmorata NLN3 2           | Genetta genetta T297 1                   | 0,14861456 |
| Leopardus tigrinus NC028317 1         | Galidictis fasciata DM333 1              | 0,1486187  |
| Leopardus pardalis T262 1             | Hyena hyaena NC020669 1                  | 0,14862579 |
| Mungotictis decemlineata NC027828 1   | Acinonyx jubatus NC005212 3              | 0,14863147 |
| Xenogale naso C07XAR110 1             | Civettictis civetta NC033378 1           | 0,14863819 |
| Ura semitorquata MH464789 1           | Civettictis civetta NC033378 1           | 0,14863884 |
| Felis nigripes NC028309 1             | Chrotogale owstoni T607 1                | 0,14866954 |
| Phocarcos hookeri NC008418 1          | Phoca groenlandica NC008429 54           | 0,14867151 |
| Mungos mungo MMC7 1                   | Genetta genetta T297 1                   | 0,14867552 |
| Panthera onca KP202264 2              | Genetta servalina NC024568 2             | 0,14868067 |
| Panthera pardus japonensis KJ866876 8 | Genetta servalina NC024568 2             | 0,14868076 |
| Parahyaena brunnea NC038159 15        | Heligale parvula SRR7637809 1            | 0,14868136 |
| Smilodon populator MF871700 1         | Heligale parvula SRR7637809 1            | 0,14868237 |
| Leopardus geoffroyi NC028320 1        | Galidictis fasciata DM333 1              | 0,14868379 |
| Prionodon pardicolor NC024569 2       | Caracal caracal NC028306 1               | 0,14868988 |
| Leopardus guigna NC028321 1           | Arctictis binturong T605 2               | 0,14869982 |
| Vulpes ferriata NC027935 1            | Speothos venaticus C48 2                 | 0,14873104 |
| Paradoxurus jerdoni MH464793 1        | Nandinia binotata NC024567 1             | 0,14874034 |
| Phoca largha NC008430 1               | Arctocepalus townsendi NC008420 1        | 0,14874446 |
| Prionailurus planiceps KY682741 4     | Attilax paludinosus T606 1               | 0,14874579 |
| Lynx pardinus NC028319 161            | Eupleres goudotii D128 1                 | 0,14874631 |
| Caracal caracal NC028306 1            | Attilax paludinosus T606 1               | 0,14874631 |
| Leopardus wiedii NC028318 1           | Heligale parvula SRR7637809 1            | 0,14874689 |
| Arctodus simus NC011116 1             | Ailuropoda melanoleuca NC009492 5        | 0,14875087 |
| Salanoia concolor D378 1              | Prionailurus planiceps KY682741 4        | 0,14875087 |
| Viverricula indica NC025296 2         | Galidictis fasciata DM333 1              | 0,14875166 |
| Panthera onca NC022842 1              | Fossa fossana D350 1                     | 0,14875378 |
| Leopardus jacobita NC028322 1         | Cryptoprocta ferox CFC13 1               | 0,14875835 |
| Leopardus colocolo NC028314 1         | Civettictis civetta GLC19 1              | 0,14876422 |
| Mungos mungo/gambianus SRR7704821 1   | Civettictis civetta NC033378 1           | 0,14877383 |
| Mungos mungo MMC7 1                   | Civettictis civetta NC033378 1           | 0,14877446 |
| Panthera pardus NC010641 5            | Genetta servalina NC024568 2             | 0,14877793 |
| Vulpes zerda KJ603240 1               | Urocyon littoralis catalinae KP129018 15 | 0,14879149 |
| Hemigalus derbyanus MH464791 1        | Attilax paludinosus T606 1               | 0,14880347 |
| Prionodon linsang EKR2391707 1        | Prionailurus planiceps KY682741 4        | 0,14880773 |
| Prionodon linsang EKR2391707 1        | Genetta servalina NC024568 2             | 0,14880858 |
| Xenogale naso C07XAR110 1             | Civettictis civetta GLC19 1              | 0,14880905 |
| Ura semitorquata MH464789 1           | Catopuma badia NC028300 1                | 0,14881118 |
| Paradoxurus hermaphroditus NLNC 1     | Leopardus jacobita NC028322 1            | 0,14881144 |
| Prionailurus planiceps KY682741 4     | Ura semitorquata MH464789 1              | 0,14881122 |
| Mungos mungo/gambianus SRR7704821 1   | Leptailurus serval NC028316 1            | 0,14881279 |
| Viverricula indica NC025296 2         | Ura semitorquata MH464789 1              | 0,1488134  |
| Leopardus pardalis NC028315 1         | Ura semitorquata MH464789 1              | 0,14881402 |
| Parahyaena brunnea NC038159 15        | Eupleres goudotii D128 1                 | 0,14881583 |
| Cryptoprocta ferox CFC13 1            | Catopuma badia NC028300 1                | 0,14881764 |
| Hyena hyaena NC020669 1               | Galidictis fasciata DM333 1              | 0,14881811 |
| Salanoia concolor D378 1              | Prionailurus planiceps NC028312 6        | 0,14881834 |
| Mungotictis decemlineata NC027828 1   | Leopardus geoffroyi NC028320 1           | 0,14881867 |
| Prionailurus bengalensis CKM45 20     | Galidictis fasciata DM333 1              | 0,1488221  |
| Smilodon populator MF871700 1         | Ura semitorquata MH464789 1              | 0,14883052 |
| Viverricula indica XK891745 1         | Panthera leo NERO 19                     | 0,14884858 |
| Smilodon populator MF871700 1         | Arctictis binturong T605 2               | 0,14887257 |
| Paradoxurus hermaphroditus NLNC 1     | Cynictis penicillata T375 1              | 0,14887524 |
| Paradoxurus hermaphroditus NC039591 1 | Leopardus pardalis NC028315 1            | 0,14887725 |
| Monachus schauinslandi NC008421 1     | Arctocepalus forsteri NC004023 28        | 0,14887802 |
| Puma yagouaroundi NC028311 1          | 0,14888001                               |            |
| Puma yagouaroundi NC028311 1          | Paradoxurus hermaphroditus NC039591 1    | 0,14888062 |
| Leptailurus serval NC028316 1         | Attilax paludinosus T606 1               | 0,14888133 |
| Viverricula indica NC025296 2         | Panthera leo spelaea KX258452 2          | 0,14888206 |
| Paradoxurus jerdoni MH464793 1        | Acinonyx jubatus NC005212 3              | 0,1488919  |
| Ura semitorquata MH464789 1           | Hemigalus derbyanus MH464791 1           | 0,14892706 |
| Cystophora cristata NC008427 1        | Arctocepalus gazella BK010918 1          | 0,14893594 |
| Phoca fasciata NC008428 1             | Neophoca cinerea NC008419 1              | 0,14894199 |
| Genetta servalina NC024568 2          | Attilax paludinosus T606 1               | 0,1489436  |

|                                      |                                      |            |
|--------------------------------------|--------------------------------------|------------|
| Catopuma badia NC028300 1            | Arctocepalus gazella BK010918 1      | 0,18530846 |
| Vulpes zerda KJ603240 1              | Lynx lynx NC027083 4                 | 0,18530889 |
| Vulpes lagopus NC026529 3            | Puma yagouaroundi NC028311 1         | 0,18530908 |
| Nyctereutes procyonoides NC013700 3  | Arctodus simus NC011116 1            | 0,18530931 |
| Lynx pardinus NC028319 161           | Arctocepalus gazella BK010918 1      | 0,18530947 |
| Neophoca cinerea NC008419 1          | Lynx canadensis NC028313 1           | 0,18530972 |
| Leopardus guigna NC028321 1          | Arctocepalus forsteri KT693377 17    | 0,18531032 |
| Pardofelis marmorata NLN3 2          | Canis latrans NC008093 7             | 0,1853106  |
| Martes foina NC020643 1              | Galidia elegans D146 1               | 0,18531083 |
| Ursus arctos GU573491 207            | Lutra sumatrana NC035810 1           | 0,18531086 |
| Prionailurus viverrinus NC028305 1   | Arctocepalus gazella BK010918 1      | 0,18531111 |
| Lyaon pictus NC028427 2              | Ichneumia albicauda T603 1           | 0,18531115 |
| Proteles cristata T393 6             | Lutra lutra NC011358 9               | 0,18531159 |
| Phocarcos hookeri NC008418 1         | Leopardus pardalis T262 1            | 0,18531197 |
| Vulpes zerda KJ603240 1              | Monachus schauinslandi NC008421 1    | 0,18531321 |
| Viverricula indica NC025296 2        | Aonyx cinerea NC035814 2             | 0,18531379 |
| Viverricula indica XK891751 1        | Ursus arctos GU573491 207            | 0,18531428 |
| Martes pennanti NC020664 16          | Leptailurus serval NC028316 1        | 0,18531573 |
| Ursus maritimus NC003428 31          | Mustela altaica NC021751 1           | 0,18531598 |
| Martes flavigula NC012141 3          | Chrotogale owstoni T607 1            | 0,18531707 |
| Ursus arctos AP012576 6              | Melogale moschata V0735A 1           | 0,18531765 |
| Mustela eversmannii NC028013 1       | Arctictis binturong T605 2           | 0,18532009 |
| Lyaon pictus NC028427 2              | Arctotherium sp NC030174 1           | 0,18532063 |
| Crossarchus platycephalus C7R66 1    | Chrysocyon brachyurus NC024172 1     | 0,18532185 |
| Ictonyx striatus T299 1              | Catopuma temminckii NC027115 41      | 0,18532425 |
| Viverra tangalunga MH464792 1        | Helarctos malayanus NC009968 2       | 0,18532631 |
| Paradoxurus hermaphroditus NLNC 1    | Martes flavigula NC012141 3          | 0,18532646 |
| Vulpes lagopus NC026529 3            | Leopardus colocolo NC028314 1        | 0,1853267  |
| Martes zibellina NC011579 39         | Ura javanica/auropunctata NC006835   | 0,18532844 |
| Spilogale putorius NC010497 1        | Cynogale bennetti KY117544 1         | 0,18533127 |
| Lynx pardinus NC028319 161           | Helarctos malayanus NC009968 2       | 0,18533313 |
| Martes pennanti NC020664 16          | Canis lupus familiaris NC002008 1231 | 0,18534121 |
| Paradoxurus hermaphroditus NLNC 1    | Ommatophoca rossii AY377287etc 1     | 0,18534505 |
| Martes flavigula NC012141 3          | Genetta genetta T297 1               | 0,1853468  |
| Panthera onca KP202264 2             | Martes flavigula NC012141 3          | 0,18535382 |
| Pusa caspica NC008431 1              | Tapirus terrestris T358              | 0,18535432 |
| Ursus maritimus NC003428 31          | Civettictis civetta NC033378 1       | 0,18535545 |
| Nyctereutes procyonoides NC013700 3  | Genetta abyssinica MG489822 1        | 0,18535496 |
| Mustela itatis NC034330 19           | Canis mesomelas KT448280 1           | 0,18535551 |
| Paguma larvata PDD5 11 2             | Lutra lutra NC011358 9               | 0,18535751 |
| Lutra sumatrana NC035810 1           | Xenogale naso C07XAR110 1            | 0,18535842 |
| Enhydra lutris NC009692 1            | Canis latrans NC008093 7             | 0,18535872 |
| Ursus arctos EU497665 29             | Gulo gulo NC009685 3                 | 0,18535997 |
| Mustela itatis NC034330 19           | Mungos mungo/gambianus SRR77048      | 0,18536077 |
| Suricata suricatta SSM10 1           | Mustela kathian NC023210 1           | 0,18536101 |
| Suricata suricatta SSM10 1           | Mustela frenata NC020640 1           | 0,18536173 |
| Mustela nigripes NC024942 1          | Ura brachyura KY117547 1             | 0,18536176 |
| Vulpes corsac NC023958 1             | Mustela nigripes NC024942 1          | 0,18536636 |
| Viverricula indica XK891745 1        | Arctocepalus forsteri KT693377 17    | 0,18536833 |
| Martes martes T302 3                 | Galidia elegans D146 1               | 0,18537052 |
| Profelis aurata NC028299 1           | Callorhinus ursinus NC008415 1       | 0,18537137 |
| Melogale moschata KP726273 1         | Hyena hyaena NC020669 1              | 0,18537217 |
| Ursus arctos EU497665 29             | Arctocepalus townsendi NC008420 1    | 0,18537274 |
| Lycalopex schuereae KT448284 1       | Civettictis civetta NC033378 1       | 0,18537325 |
| Ursus arctos EU497665 29             | Enhydra lutris NC009692 1            | 0,18537438 |
| Martes flavigula NC012141 3          | Ura javanica/auropunctata NC006835   | 0,18537439 |
| Mustela eversmannii NC028013 1       | Felis chaus NC028307 1               | 0,1853752  |
| Vulpes corsac NC023958 1             | Leopardus pardalis NC028315 1        | 0,18537527 |
| Vulpes corsac NC023958 1             | Prionailurus viverrinus NC028305 1   | 0,18537536 |
| Lynx rufus NC014456 3                | Arctocepalus forsteri KT693377 17    | 0,1853756  |
| Vulpes corsac NC023958 1             | Puma concolor NC016470 22            | 0,18537576 |
| Ursus arctos GU573491 207            | Phocarcos hookeri NC008418 1         | 0,18537706 |
| Tremarctos ornatus NC009969 2        | Profelis aurata NC028299 1           | 0,18537717 |
| Paradoxurus jerdoni MH464793 1       | Nyctereutes procyonoides NC013700 3  | 0,18537785 |
| Lontra canadensis SRR10409165 1      | Leopardus wiedii NC028318 1          | 0,18537793 |
| Taxidea taxus NC020646 1             | Panthera uncia KP202269 1            | 0,18537834 |
| Ursus maritimus NC003428 31          | Meles anakuma NC009677 1             | 0,18537849 |
| Ursus arctos isabellinus 1885 2      | Meles anakuma NC009677 1             | 0,18537851 |
| Prionailurus bengalensis CKM45 20    | Melogale moschata V0735A 1           | 0,18537967 |
| Lynx pardinus NC028319 161           | Lutrogale perspicillata NC035811 1   | 0,18538034 |
| Felis catus NC001700 2               | Arctocepalus pusillus NC008417 1     | 0,18538092 |
| Ursus arctos prunosus MG066703 3     | Mustela itatis NC034330 19           | 0,18538103 |
| Puma concolor NC016470 22            | Ursus lotor AB462049 4               | 0,18538134 |
| Prionailurus planiceps NC028312 6    | Lutrogale perspicillata NC035811 1   | 0,18538208 |
| Leopardus jacobita NC028322 1        | Arctocepalus pusillus NC008417 1     | 0,18538305 |
| Ursus thibetanus laniger MH281753 2  | Crossarchus platycephalus C7R66 1    | 0,18538349 |
| Melursus ursinus NC009970 2          | Martes pennanti NC020664 16          | 0,18538496 |
| Vulpes vulpes NC008434 5             | Arctictis binturong T605 2           | 0,18538509 |
| Panthera onca NC022842 1             | Mustela itatis NC034330 19           | 0,18538576 |
| Ursus maritimus NC003428 31          | Martes foina NC020643 1              | 0,18538858 |
| Ursus spelaeus NC011112 8            | Chrotogale owstoni T607 1            | 0,1853888  |
| Viverricula indica NC025296 2        | Otaria byronia OTAB 1                | 0,18538882 |
| Lutra lutra NC011358 9               | Ura javanica/auropunctata NC006835   | 0,18538888 |
| Zalophus wolfebaeki SRR4431565 1     | Catopuma temminckii NC027115 41      | 0,18539208 |
| Ursus thibetanus thibetanus NC011112 | Procyon lotor AB462049 4             | 0,18539225 |
| Melursus ursinus NC009970 2          | Genetta servalina NC024568 2         | 0,18539709 |
| Paguma larvata PDD5 11 2             | Ailuropoda melanoleuca NC009492 5    | 0,18539762 |
| Lynx canadensis NC028313 1           | Helarctos malayanus NC009968 2       | 0,1853977  |
| Ursus thibetanus mupinensis NC00875  | Ictonyx striatus T299 1              | 0,18539797 |
| Ursus spelaeus EU327344 13           | Catopuma badia NC028300 1            | 0,18539941 |
| Martes martes T302 3                 | Ura javanica/auropunctata NC006835   | 0,1854004  |
| Civettictis civetta NC033378 1       | Tapirus terrestris T358              | 0,18540122 |
| Leopardus geoffroyi NC028320 1       | Galictis vittata T412 1              | 0,18540227 |
| Puma yagouaroundi NC028311 1         | Melursus ursinus NC009970 2          | 0,18540315 |
| Ursus spelaeus NC011112 8            | Prionailurus bengalensis CKM45 20    | 0,18540464 |
| Salanoia concolor D378 1             | Gulo gulo NC009685 3                 | 0,18540676 |
| Meles anakuma NC009677 1             | Canis lupus chanco NC010340 4        | 0,18540794 |
| Enhydra lutris NC009692 1            | Chrotogale owstoni T607 1            | 0,18541354 |
| Ursus americanus JX196366 3          | Paguma larvata PDD5 11 2             | 0,18541729 |
| Eumetopias jubatus NC004030 10       | Civettictis civetta GLC19 1          | 0,18541893 |
| Hemigalus derbyanus MH464791 1       | Arctocepalus forsteri KT693377 17    | 0,18541944 |
| Mustela putorius NC020638 4          | Canis mesomelas KT448280 1           | 0,18542051 |
| Prionailurus planiceps NC028312 6    | Canis mesomelas KT448280 1           | 0,18542257 |

|                                       |                                       |            |
|---------------------------------------|---------------------------------------|------------|
| Lynx rufus NC014456 3                 | Urva semitorquata MH464789 1          | 0,14894602 |
| Viverricula indica NC025296 2         | Urva javanica T413 1                  | 0,14894709 |
| Genetta genetta T297 1                | Galidictis fasciata DM333 1           | 0,14894864 |
| Prionailurus planiceps KY682741 4     | Eupleres goudotii D128 1              | 0,14894892 |
| Prionailurus viverrinus NC028305 1    | Helogale parvula SRR7637809 1         | 0,14894971 |
| Paradoxurus jerdoni MH464793 1        | Catopuma temminckii NC027115 41       | 0,14895648 |
| Felis nigripes NC028309 1             | Arctictis binturong T605 2            | 0,14896227 |
| Neophoca cinerea NC008419 1           | Cystophora cristata NC008427 1        | 0,14900236 |
| Viverricula indica XK891745 1         | Urva javanica T413 1                  | 0,14901073 |
| Lynx canadensis NC028313 1            | Crossarchus platycephalus C7R66 1     | 0,14901286 |
| Fossa fossana D350 1                  | Felis margarita NC028308 1            | 0,14901438 |
| Phoca largha NC008430 1               | Arctocepalus forsteri KT693377 17     | 0,14901445 |
| Prionailurus planiceps KY682741 4     | Paradoxurus hermaphroditus NC039591 1 | 0,14901486 |
| Mungotictis decemlineata NC027828 1   | Felis silvestris lybica KP202275 4    | 0,1490193  |
| Viverricula indica NC025296 2         | Galerella sanguinea T378 1            | 0,14902237 |
| Leopardus guigna NC028321 1           | Cryptoprocta ferox CFC13 1            | 0,14902397 |
| Viverricula indica NC025296 2         | Prionodon pardicolor NC024569 2       | 0,14902404 |
| Leopardus tigrinus NC028317 1         | Cryptoprocta ferox CFC13 1            | 0,14902794 |
| Mungus mungo/gambianus SRR7704821 1   | Leopardus colocolo NC028314 1         | 0,14903234 |
| Panthera tigris amoyensis NC014770 2  | Civettictis civetta NC033378 1        | 0,14906187 |
| Leopardus jacobita NC028322 1         | Diplogale hosei MH464790 1            | 0,14907092 |
| Mirounga angustirostris SRR10331586 1 | Arctocepalus gazella BK010918 1       | 0,14907874 |
| Felis silvestris lybica KP202275 4    | Crossarchus platycephalus C7R66 1     | 0,14908116 |
| Lynx rufus NC014456 3                 | Atlix paludinosus T606 1              | 0,14908139 |
| Fossa fossana D350 1                  | Felis catus NC001700 2                | 0,14908153 |
| Phoca largha NC008430 1               | Arctocepalus australis MG023139 1     | 0,14908178 |
| Prionailurus rubiginosus NC028304 2   | Mungus mungo/gambianus SRR7704821 1   | 0,14908192 |
| Nandinia binotata NC024567 1          | Ichneumia albicauda T603 1            | 0,14908203 |
| Viverricula indica NC025296 2         | Atlix paludinosus T606 1              | 0,14908262 |
| Paradoxurus jerdoni MH464793 1        | Otocolobus manul NC028323 1           | 0,14908318 |
| Otaria byronia OTAB 1                 | Mirounga angustirostris SRR10331586 1 | 0,14908673 |
| Paradoxurus hermaphroditus NLNC 1     | Catopuma temminckii NC027115 41       | 0,14909084 |
| Puma yagouaroundi NC028311 1          | Diplogale hosei MH464790 1            | 0,1491383  |
| Urva semitorquata MH464789 1          | Felis margarita NC028308 1            | 0,14914887 |
| Phoca groenlandica NC008429 54        | Otaria byronia OTAB 1                 | 0,14914888 |
| Prionailurus planiceps KY682741 4     | Helogale parvula SRR7637809 1         | 0,14914912 |
| Prionailurus rubiginosus NC028304 2   | Bdeogale nigripes GLC15 1             | 0,14914936 |
| Phoca vitulina NC001325 1             | Arctocepalus gazella BK010918 1       | 0,14914994 |
| Viverricula indica XK891745 1         | Panthera onca KP202264 2              | 0,14915152 |
| Galidictis fasciata DM333 1           | Catopuma badia NC028300 1             | 0,14915152 |
| Paradoxurus hermaphroditus NLNC 1     | Leopardus geoffroyi NC028320 1        | 0,14915705 |
| Mungotictis decemlineata NC027828 1   | Leopardus colocolo NC028314 1         | 0,14917187 |
| Panthera pardus NC010641 5            | Genetta abyssinica MG489822 1         | 0,14921035 |
| Phoca groenlandica NC008429 54        | Arctocepalus australis MG023139 1     | 0,14921039 |
| Mirounga angustirostris SRR10331586 1 | Arctocepalus forsteri NC004023 28     | 0,14921114 |
| Viverra zibetha T609 1                | Urva javanica T413 1                  | 0,14921287 |
| Viverricula indica NC025296 2         | Eupleres goudotii D128 1              | 0,14921464 |
| Nandinia binotata NC024567 1          | Cryptoprocta ferox CFC13 1            | 0,14921466 |
| Phoca fasciata NC008428 1             | Otaria byronia OTAB 1                 | 0,14921553 |
| Pusa hispida NC 008433 1              | Arctocepalus forsteri NC004023 28     | 0,14921556 |
| Prionailurus bengalensis NC028301 12  | Mungus mungo/gambianus SRR7704821 1   | 0,14921664 |
| Prionailurus planiceps NC028312 6     | Paradoxurus hermaphroditus NC039591 1 | 0,14921668 |
| Viverra zibetha T609 1                | Salanoia concolor D378 1              | 0,14921726 |
| Paguma larvata PDD511 2               | Felis nigripes NC028309 1             | 0,14921828 |
| Mungotictis decemlineata NC027828 1   | Leopardus guigna NC028321 1           | 0,14922125 |
| Cryptoprocta ferox CFC13 1            | Civettictis civetta NC033378 1        | 0,14924508 |
| Halichoerus grypus NC001602 2         | Arctocepalus townsendi NC008420 1     | 0,14924565 |
| Smilodon populator MF871700 1         | Paradoxurus jerdoni MH464793 1        | 0,14926688 |
| Eupleres goudotii D128 1              | Civettictis civetta GLC19 1           | 0,14927804 |
| Hyena hyaena NC020669 1               | Urva semitorquata MH464789 1          | 0,14928523 |
| Viverra zibetha T609 1                | Panthera uncia NC010638 1             | 0,14928639 |
| Leopardus guigna NC028321 1           | Galidictis fasciata DM333 1           | 0,14928941 |
| Prionodon pardicolor NC024569 2       | Lynx lynx NC027083 4                  | 0,14929399 |
| Panthera onca NC022842 1              | Genetta servalina NC024568 2          | 0,14929442 |
| Viverra zibetha T609 1                | Urva javanica/auropunctata NC006835 1 | 0,14931455 |
| Phoca vitulina NC001325 1             | Arctocepalus forsteri KT693377 17     | 0,14935314 |
| Salanoia concolor D378 1              | Genetta genetta T297 1                | 0,14935216 |
| Leopardus pardalis T262 1             | Ichneumia albicauda T603 1            | 0,14935358 |
| Prionailurus bengalensis CKM45 20     | Mungus mungo MMC7 1                   | 0,14935392 |
| Leopardus wiedii NC028318 1           | Hyena hyaena NC020669 1               | 0,14936571 |
| Viverricula indica XK891751 1         | Urva javanica/auropunctata NC006835 1 | 0,14938071 |
| Halichoerus grypus NC001602 2         | Arctocepalus forsteri KT693377 17     | 0,14938101 |
| Salanoia concolor D378 1              | Panthera pardus NC010641 5            | 0,14939038 |
| Felis catus NC001700 2                | Diplogale hosei MH464790 1            | 0,14940363 |
| Viverricula indica XK891751 1         | Bdeogale nigripes GLC15 1             | 0,14941439 |
| Prionodon linsang ERR2391707 1        | Prionailurus bengalensis CKM45 20     | 0,14941725 |
| Otocolobus manul NC028323 1           | Fossa fossana D350 1                  | 0,14941852 |
| Prionailurus planiceps KY682741 4     | Mungotictis decemlineata NC027828 1   | 0,14942385 |
| Prionodon pardicolor NC024569 2       | Prionailurus viverrinus NC028305 1    | 0,14943074 |
| Leopardus tigrinus NC028317 1         | Arctictis binturong T605 2            | 0,14943239 |
| Urva javanica T413 1                  | Genetta abyssinica MG489822 1         | 0,14943711 |
| Nandinia binotata NC024567 1          | Urva javanica/auropunctata NC006835 1 | 0,14943849 |
| Panthera pardus japonensis KJ866876 8 | Genetta abyssinica MG489822 1         | 0,14945482 |
| Meles anakuma NC009677 1              | Lontra canadensis SRR10409165 1       | 0,1494717  |
| Cystophora cristata NC008427 1        | Arctocepalus forsteri NC004023 28     | 0,14947371 |
| Viverricula indica XK891751 1         | Crossarchus platycephalus C7R66 1     | 0,14948206 |
| Urva semitorquata MH464789 1          | Genetta genetta T297 1                | 0,14948346 |
| Paradoxurus jerdoni MH464793 1        | Leopardus pardalis T262 1             | 0,14948402 |
| Puma concolor NC016470 22             | Fossa fossana D350 1                  | 0,14948532 |
| Catopuma badia NC028300 1             | Atlix paludinosus T606 1              | 0,14948544 |
| Puma concolor NC016470 22             | Mungus mungo/gambianus SRR7704821 1   | 0,14948551 |
| Prionailurus planiceps NC028312 6     | Crossarchus platycephalus C7R66 1     | 0,1494856  |
| Prionailurus planiceps NC028312 6     | Paradoxurus jerdoni MH464793 1        | 0,14948647 |
| Paradoxurus hermaphroditus NLNC 1     | Felis nigripes NC028309 1             | 0,1494866  |
| Paradoxurus jerdoni MH464793 1        | Felis margarita NC028308 1            | 0,14948663 |
| Panthera leo NERO 19                  | Hemigalus derbyanus MH464791 1        | 0,14948732 |
| Salanoia concolor D378 1              | Felis catus NC001700 2                | 0,149491   |
| Xenogale naso C07XAR110 1             | Hemigalus derbyanus MH464791 1        | 0,14951533 |
| Taxidea taxus NC020646 1              | Galictis vittata T412 1               | 0,1495166  |
| Phoca groenlandica NC008429 54        | Neophoca cinerea NC008419 1           | 0,14954811 |
| Viverricula indica XK891745 1         | Atlix paludinosus T606 1              | 0,1495491  |
| Viverra zibetha T609 1                | Cynictis penicillata T375 1           | 0,14954929 |
| Paradoxurus hermaphroditus NC039591 1 | Leopardus pardalis T262 1             | 0,14955077 |

|                                       |                                      |            |
|---------------------------------------|--------------------------------------|------------|
| Prionailurus bengalensis NC028301 12  | Tapirus terrestris T358              | 0,18542467 |
| Meles leucurus NC039173 4             | Xenogale naso C07XAR110 1            | 0,18542627 |
| Civettictis civetta GLC19 1           | Tapirus terrestris T358              | 0,1854272  |
| Melogale moschata KP726273 1          | Xenogale naso C07XAR110 1            | 0,18542726 |
| Martes zibellina NC011579 39          | Bdeogale nigripes GLC15 1            | 0,18542808 |
| Procyon lotor AB462046 3              | Arctocepalus townsendi NC008420 1    | 0,18542996 |
| Meles meles T303 3                    | Cynogale bennetti KY117544 1         | 0,18543106 |
| Mungus mungo/gambianus SRR77048       | Martes martes T302 3                 | 0,18543112 |
| Neofelis nebulosa NC008450 3          | Canis adustus KT448271 1             | 0,18543252 |
| Galerella sanguinea T378 1            | Bassariscus sumichrasti SRX1099089 1 | 0,18543354 |
| Salanoia concolor D378 1              | Arctocepalus pusillus NC008417 1     | 0,18543574 |
| Martes zibellina NC011579 39          | Canis mesomelas KT448280 1           | 0,1854362  |
| Vulpes zerda KI603240 1               | Mustela erminea T305 2               | 0,18543632 |
| Viverricula indica XK891751 1         | Melogale moschata V0735A 1           | 0,18543735 |
| Pardofelis marmorata NLN3 2           | Meles anakuma NC009677 1             | 0,1854376  |
| Pusa caspica NC008431 1               | Paradoxurus hermaphroditus NC03959   | 0,18543826 |
| Mustela nivalis T306 5                | Urva javanica T413 1                 | 0,18543963 |
| Ursus maritimus GU573488 Svalbard     | Melogale moschata V0735A 1           | 0,18544082 |
| Ursus maritimus NC003428 31           | Melogale moschata V0735A 1           | 0,18544082 |
| Ursus maritimus GU573488 Svalbard     | Smilodon populator MF871700 1        | 0,18544137 |
| Panthera onca KP202264 2              | Mustela itarsi NC034330 19           | 0,18544145 |
| Mungus mungo/gambianus SRR77048       | Lycena pictus NC028427 2             | 0,18544215 |
| Mustela putorius NC020638 4           | Ichneumia albicauda T603 1           | 0,18544215 |
| Prionailurus bengalensis NC028301 12  | Arctocepalus townsendi NC008420 1    | 0,18544225 |
| Mustela eversmannii NC028013 1        | Genetta genetta T297 1               | 0,18544263 |
| Canis adustus KT448271 1              | Callorhinus ursinus NC008415 1       | 0,18544403 |
| Lontra canadensis SRR10409165 1       | Catopuma badia NC028300 1            | 0,18544407 |
| Leopardus tigrinus NC028317 1         | Arctocepalus gazella BK010918 1      | 0,18544454 |
| Vulpes zerda KI603240 1               | Mirounga angustirostris SRR10331586  | 0,18544549 |
| Tremarctos ornatus NC009969 2         | Felis margarita NC028308 1           | 0,18544571 |
| Nasua nasua NC020647 1                | Monachus schauinslandi NC008421 1    | 0,18544608 |
| Nyctereutes procyonoides NC013700 3   | Felis margarita NC028308 1           | 0,18544622 |
| Profelis aurata NC028299 1            | Nyctereutes procyonoides NC013700 3  | 0,18544693 |
| Lynx lynx NC027083 4                  | Lutrogale perspicillata NC035811 1   | 0,18544734 |
| Urocyon littoralis catalinae KP129018 | Monachus schauinslandi NC008421 1    | 0,18544744 |
| Urocyon cinereargenteus NC026723 2    | Monachus schauinslandi NC008421 1    | 0,1854475  |
| Prionailurus viverrinus NC028305 1    | Phocarcus hookeri NC008418 1         | 0,18544826 |
| Panthera tigris NC010642 35           | Mustela frenata NC020640 1           | 0,18544929 |
| Poecililogale albinucha T602 1        | Otocolobus manul NC028323 1          | 0,18545012 |
| Profelis aurata NC028299 1            | Arctocepalus pusillus NC008417 1     | 0,18545015 |
| Panthera onca NC022842 1              | Mustela eversmannii NC028013 1       | 0,18545288 |
| Ursus spelaeus EU327344 13            | Lutra lutra LC050126 1               | 0,18545315 |
| Lutra lutra NC011358 9                | Canis aureus KT448274 1              | 0,18545382 |
| Ursus arctos pruinosus MG066703 3     | Civettictis civetta GLC19 1          | 0,18545592 |
| Ursus arctos EU497665 29              | Martes foina NC020643 1              | 0,18545607 |
| Ursus thibetanus mupinensis NC00875   | Felis nigripes NC028309 1            | 0,18545614 |
| Ursus arctos isabellinus 1885 2       | Leopardus geoffroyi NC028320 1       | 0,18545865 |
| Eumetopias jubatus NC004030 10        | Civettictis civetta NC033378 1       | 0,18545885 |
| Zalophus wolfebaeki SRR4431565 1      | Leopardus jacobita NC028322 1        | 0,18546171 |
| Zalophus californianus NC008416 1     | Salanoia concolor D378 1             | 0,18546204 |
| Leopardus colocolo NC028314 1         | Arctocepalus gazella BK010918 1      | 0,18546386 |
| Urva brachyura KY117547 1             | Canis lupus chanco NC010340 4        | 0,18546401 |
| Ursus arctos AP012576 6               | Bassariscus sumichrasti SRX1099089 1 | 0,18546405 |
| Urva javanica/auropunctata NC006835   | Canis latrans NC008093 7             | 0,18546607 |
| Ursus arctos AP012576 6               | Martes martes T302 3                 | 0,18546616 |
| Ursus thibetanus formosanus NC00933   | Leopardus jacobita NC028322 1        | 0,18546617 |
| Otocyon megalotis SAF1 2              | Leopardus colocolo NC028314 1        | 0,18546626 |
| Mustela sibirica AP017394 11          | Urva javanica/auropunctata NC006835  | 0,18546655 |
| Galictis vittata T412 1               | Felis silvestris lybica KP202275 4   | 0,18546662 |
| Ursus thibetanus laniger MH281753 2   | Felis nigripes NC028309 1            | 0,18546687 |
| Civettictis civetta GLC19 1           | Arctocepalus forsteri NC004023 28    | 0,18546757 |
| Ichneumia albicauda T603 1            | Canis lupus familiaris NC002008 1231 | 0,18546772 |
| Prionailurus planiceps NC028312 6     | Helarctos malayanus NC009968 2       | 0,18546793 |
| Urva javanica/auropunctata NC006835   | Arctonyx collaris NC020645 1         | 0,18546796 |
| Melurus ursinus NC009970 2            | Felis silvestris lybica KP202275 4   | 0,18546833 |
| Martes flavigula NC012141 3           | Xenogale naso C07XAR110 1            | 0,18547395 |
| Lynx canadensis NC028313 1            | Arctocepalus forsteri NC004023 28    | 0,18547606 |
| Lycena pictus NC028427 2              | Urva javanica/auropunctata NC006835  | 0,18547766 |
| Neofelis nebulosa NC008450 3          | Mustela erminea T305 2               | 0,1854794  |
| Pardofelis marmorata NLN3 2           | Canis lupus chanco NC010340 4        | 0,1854821  |
| Cuon alpinus NC013445 3               | Civettictis civetta GLC19 1          | 0,18548737 |
| Paradoxurus hermaphroditus NC03959    | Cuon alpinus NC013445 3              | 0,18548788 |
| Eumetopias jubatus NC004030 10        | Catopuma temminckii NC027115 41      | 0,18548894 |
| Leopardus jacobita NC028322 1         | Eumetopias jubatus NC004030 10       | 0,18549022 |
| Lutra lutra LC050126 1                | Atlix paludinosus T606 1             | 0,18549091 |
| Melogale moschata V0735A 1            | Crossarchus platycephalus C7R66 1    | 0,18549295 |
| Meles leucurus NC039173 4             | Cynictis penicillata T375 1          | 0,18549402 |
| Mustela sibirica AP017394 11          | Mungus mungo/gambianus SRR77048      | 0,18549454 |
| Martes americana NC020642 1           | Urva javanica T413 1                 | 0,18549487 |
| Martes americana NC020642 1           | Cynictis penicillata T375 1          | 0,18549514 |
| Eupleres goudotii D128 1              | Callorhinus ursinus NC008415 1       | 0,18549597 |
| Mustela frenata NC020640 1            | Helogale parvula SRR7637809 1        | 0,18549669 |
| Viverra tangalunga MH464792 1         | Urva brachyura KY117547 1            | 0,18549681 |
| Smilodon populator MF871700 1         | Aonyx cinerea NC035814 2             | 0,18549703 |
| Potos flavus T414 1                   | Canis latrans NC008093 7             | 0,18549709 |
| Phocarcus hookeri NC008418 1          | Mungus mungo MMC7 1                  | 0,18549785 |
| Canis latrans NC008093 7              | Bdeogale nigripes GLC15 1            | 0,1854984  |
| Prionodon linsang ERR2391707 1        | Arctonyx collaris NC020645 1         | 0,18549857 |
| Nyctereutes procyonoides NC013700 3   | Bdeogale nigripes GLC15 1            | 0,18549922 |
| Procyon lotor AB462046 3              | Fossa fossana D350 1                 | 0,18549965 |
| Atlix paludinosus T606 1              | Aonyx cinerea NC035814 2             | 0,18549982 |
| Urva semitorquata MH464789 1          | Aonyx cinerea NC035814 2             | 0,18550029 |
| Bassaricyon neblina SRX1097850 1      | Arctocepalus gazella BK010918 1      | 0,18550065 |
| Ichneumia albicauda T603 1            | Canis anthus NC027956 2              | 0,18550135 |
| Meles anakuma NC009677 1              | Canis latrans NC008093 7             | 0,18550164 |
| Conepatus chinga NC022596 1           | Caracal caracal NC028306 1           | 0,18550211 |
| Viverricula indica XK891745 1         | Arctocepalus australis MG023139 1    | 0,18550278 |
| Lynx rufus NC014456 3                 | Ailuurus fulgens NC011124 1          | 0,18550424 |
| Paradoxurus jerdoni MH464793 1        | Melogale moschata V0735A 1           | 0,18550432 |
| Melogale moschata NC020644 1          | Canis latrans NC008093 7             | 0,18550603 |
| Taxidea taxus NC020646 1              | Canis latrans NC008093 7             | 0,18550643 |
| Vulpes corsac NC023958 1              | Genetta servalina NC024568 2         | 0,18550685 |
| Vulpes zerda KI603240 1               | Genetta servalina NC024568 2         | 0,18550749 |



|                                       |                                       |            |
|---------------------------------------|---------------------------------------|------------|
| Prionodon pardicolor NC024569 2       | Nandinia binotata NC024567 1          | 0,14955126 |
| Panthera leo spelaea KX258452 2       | Genetta servalina NC024568 2          | 0,14955308 |
| Paradoxurus hermaphroditus NLNC 1     | Lynx rufus NC014456 3                 | 0,14955331 |
| Leopardus pardalis NC028315 1         | Attilax paludinosus T606 1            | 0,14955541 |
| Leopardus tigrinus NC028317 1         | Crossarchus platycephalus C7R66 1     | 0,14955615 |
| Viverricula indica KX891745 1         | Galerella sanguinea T378 1            | 0,14955685 |
| Puma yagouaroundi NC028311 1          | Galidictis fasciata DM333 1           | 0,14956003 |
| Panthera tigris amoyensis NC014770 2  | Civettictis civetta GLC19 1           | 0,14956166 |
| Lynx canadensis NC028313 1            | Cryptoprocta ferox CFC13 1            | 0,14956225 |
| Viverricula indica NC025296 2         | Panthera tigris NC010642 35           | 0,14956468 |
| Genetta abyssinica MG489822 1         | Cryptoprocta ferox CFC13 1            | 0,14958076 |
| Panthera onca NC022842 1              | Genetta abyssinica MG489822 1         | 0,14959538 |
| Prionodon linsang ERR2391707 1        | Prionailurus planiceps NC028312 6     | 0,14961573 |
| Prionailurus rubiginosus NC028304 2   | Mungos mungo MMC7 1                   | 0,14962    |
| Viverricula indica KX891745 1         | Galidictis fasciata DM333 1           | 0,14962137 |
| Pardofelis marmorata NLN3 2           | Paguma larvata PDD511 2               | 0,14962219 |
| Leopardus pardalis T262 1             | Helogale parvula SRR7637809 1         | 0,14962222 |
| Mungos mungo MMC7 1                   | Leopardus pardalis NC028312 1         | 0,14962268 |
| Prionailurus planiceps NC028312 6     | Mungotictis decemlineata NC027828 1   | 0,14962605 |
| Viverricula indica KX891745 1         | Panthera onca NC022842 1              | 0,14963049 |
| Panthera leo NERO 19                  | Genetta abyssinica MG489822 1         | 0,14963241 |
| Mirounga angustirostris SRR10331586 1 | Arctocepalus townsendi NC008420 1     | 0,1496834  |
| Urva javanica T413 1                  | Cryptoprocta ferox CFC13 1            | 0,14968559 |
| Lynx pardinus NC028319 161            | Crossarchus platycephalus C7R66 1     | 0,1496868  |
| Urva semitorquata MH464789 1          | Felis silvestris lybica KP202275 4    | 0,14968732 |
| Phoca vitulina NC001325 1             | Arctocepalus australis MG023139 1     | 0,14968793 |
| Viverricula indica NC025296 2         | Xenogale naso C07XAR110 1             | 0,14968807 |
| Puma yagouaroundi NC028311 1          | Paradoxurus jerdoni MH464793 1        | 0,14968893 |
| Mungos mungo MMC7 1                   | Leopardus jacobita NC028322 1         | 0,14968948 |
| Prionailurus viverrinus NC028305 1    | Mungos mungo/gambianus SRR7704821 1   | 0,14968994 |
| Viverricula indica KX891745 1         | Panthera pardus japonensis KJ866876 8 | 0,14969015 |
| Prionailurus bengalensis NC028301 12  | Cryptoprocta ferox CFC13 1            | 0,14969751 |
| Prionailurus bengalensis NC028301 12  | Parahaena brunnea NC038159 15         | 0,14970502 |
| Halichoerus grypus NC001602 2         | Arctocepalus australis MG023139 1     | 0,14971777 |
| Prionailurus viverrinus NC028305 1    | Diplogale hosei MH464790 1            | 0,14973408 |
| Panthera tigris NC010642 35           | Civettictis civetta NC03378 1         | 0,1497357  |
| Nandinia binotata NC024567 1          | Helogale parvula SRR7637809 1         | 0,14974414 |
| Pusa caspica NC008431 1               | Arctocepalus forsteri NC004023 28     | 0,14974473 |
| Odobenus rosmarus NC004029 29         | Callorhinus ursinus NC008415 1        | 0,14974864 |
| Leopardus jacobita NC028322 1         | Urva semitorquata MH464789 1          | 0,1497573  |
| Ichneumia albicauda T603 1            | Genetta servalina NC024568 2          | 0,14976446 |
| Urva javanica/auripunctata NC006835 1 | Genetta genetta T297 1                | 0,14978471 |
| Prionailurus planiceps NC028312 6     | Diplogale hosei MH464790 1            | 0,14979732 |
| Hemigalus derbyanus MH464791 1        | Crossarchus platycephalus C7R66 1     | 0,14979734 |
| Phocarcos hookeri NC008418 1          | Cystophora cristata NC008427 1        | 0,14980903 |
| Prionodon linsang ERR2391707 1        | Leopardus pardalis T262 1             | 0,14981589 |
| Prionodon linsang ERR2391707 1        | Leopardus pardalis NC028315 1         | 0,1498159  |
| Viverricula indica KX891745 1         | Panthera leo spelaea KX258452 2       | 0,14982192 |
| Prionailurus viverrinus NC028305 1    | Paradoxurus hermaphroditus NLNC 1     | 0,14982212 |
| Viverricula indica NC025296 2         | Urva brachyura KY117547 1             | 0,14982264 |
| Crossarchus platycephalus C7R66 1     | Caracal caracal NC028306 1            | 0,14982307 |
| Paradoxurus jerdoni MH464793 1        | Felis silvestris lybica KP202275 4    | 0,14982311 |
| Prionailurus planiceps KY682741 4     | Paradoxurus jerdoni MH464793 1        | 0,14982326 |
| Prionailurus rubiginosus NC028304 2   | Galerella sanguinea T378 1            | 0,14982361 |
| Paradoxurus hermaphroditus NLNC 1     | Felis chaus NC028307 1                | 0,14982392 |
| Genetta abyssinica MG489822 1         | Galidia elegans D146 1                | 0,14982793 |
| Leptailurus serval NC028316 1         | Galidictis fasciata DM333 1           | 0,14982961 |
| Leopardus colocolo NC028314 1         | Hyaena hyaena NC020669 1              | 0,14985214 |
| Prionodon pardicolor NC024569 2       | Hemigalus derbyanus MH464791 1        | 0,14985235 |
| Neofelis nebulosa NC008450 3          | Civettictis civetta GLC19 1           | 0,14985365 |
| Panthera pardus NC010641 5            | Genetta genetta T297 1                | 0,14985764 |
| Prionailurus planiceps NC028312 6     | Chrotogale owstoni T607 1             | 0,14987998 |
| Cynictis penicillata T375 1           | Civettictis civetta GLC19 1           | 0,14988641 |
| Puma concolor NC016470 22             | Crossarchus platycephalus C7R66 1     | 0,1498898  |
| Viverra zibetha T609 1                | Mungotictis decemlineata NC027828 1   | 0,14989035 |
| Paradoxurus jerdoni MH464793 1        | Felis nigripes NC028309 1             | 0,14989054 |
| Leopardus guigna NC028321 1           | Crossarchus platycephalus C7R66 1     | 0,14989148 |
| Hyaena hyaena NC020669 1              | Helogale parvula SRR7637809 1         | 0,14989176 |
| Proteles cristata T393 6              | Crossarchus platycephalus C7R66 1     | 0,14989468 |
| Paradoxurus hermaphroditus NC039591 1 | Catopuma temminckii NC027115 41       | 0,14989556 |
| Smilodon populator MF871700 1         | Galerella sanguinea T378 1            | 0,14990054 |
| Cystophora cristata NC008427 1        | Arctocepalus townsendi NC008420 1     | 0,14994451 |
| Pusa sibirica NC008432 2              | Arctocepalus forsteri NC004023 28     | 0,14994614 |
| Prionailurus planiceps KY682741 4     | Chrotogale owstoni T607 1             | 0,14994739 |
| Phoca groenlandica NC008429 54        | Arctocepalus forsteri NC004023 28     | 0,14994796 |
| Suricata suricatta S5M10 1            | Galidia elegans D146 1                | 0,14994982 |
| Phoca vitulina NC001325 1             | Arctocepalus townsendi NC008420 1     | 0,14995667 |
| Puma yagouaroundi NC028311 1          | Mungos mungo MMC7 1                   | 0,14995669 |
| Prionailurus planiceps NC028312 6     | Helogale parvula SRR7637809 1         | 0,14995718 |
| Paradoxurus hermaphroditus NLNC 1     | Lynx pardinus NC028319 161            | 0,14995734 |
| Smilodon populator MF871700 1         | Attilax paludinosus T606 1            | 0,14995867 |
| Panthera pardus japonensis KJ866876 8 | Genetta genetta T297 1                | 0,14996153 |
| Salanoia concolor D378 1              | Felis margarita NC028308 1            | 0,14996275 |
| Salanoia concolor D378 1              | Puma concolor NC016470 22             | 0,1499631  |
| Panthera tigris NC010642 35           | Genetta servalina NC024568 2          | 0,14996566 |
| Genetta abyssinica MG489822 1         | Eupleres goudotii D128 1              | 0,14996722 |
| Cynictis penicillata T375 1           | Civettictis civetta NC03378 1         | 0,14996951 |
| Genetta abyssinica MG489822 1         | Bdeogale nigripes GLC15 1             | 0,14999554 |
| Paradoxurus hermaphroditus NLNC 1     | Mungos mungo MMC7 1                   | 0,15001835 |
| Paguma larvata PDD511 2               | Mungos mungo MMC7 1                   | 0,15001953 |
| Viverra zibetha T609 1                | Urva semitorquata MH464789 1          | 0,15002081 |
| Viverra zibetha T609 1                | Helogale parvula SRR7637809 1         | 0,15002099 |
| Felis silvestris lybica KP202275 4    | Attilax paludinosus T606 1            | 0,1500247  |
| Viverricula indica KX891745 1         | Salanoia concolor D378 1              | 0,15002503 |
| Puma concolor NC016470 22             | Paradoxurus jerdoni MH464793 1        | 0,15002528 |
| Viverricula indica NC025296 2         | Helogale parvula SRR7637809 1         | 0,15002552 |
| Mungos mungo/gambianus SRR7704821 1   | Leopardus pardalis NC028315 1         | 0,15002556 |
| Lynx rufus NC014456 3                 | Eupleres goudotii D128 1              | 0,15002578 |
| Leopardus wiedii NC028318 1           | Ichneumia albicauda T603 1            | 0,15002707 |
| Galidictis fasciata DM333 1           | Felis silvestris lybica KP202275 4    | 0,15002997 |
| Viverricula indica NC025296 2         | Panthera uncia NC010638 1             | 0,15003017 |
| Prionailurus planiceps NC028312 6     | Galidictis fasciata DM333 1           | 0,15003031 |
| Salanoia concolor D378 1              | Leopardus guigna NC028321 1           | 0,1500306  |

|                                     |                                     |            |
|-------------------------------------|-------------------------------------|------------|
| Viverra tangalunga MH464792 1       | Panthera onca KP202264 2            | 0,1855083  |
| Ursus maritimus GU573488 Svalbard   | Fossa fossana D350 1                | 0,18550861 |
| Cryptoprocta ferox CFC13 1          | Aonyx cinerea NC035814 2            | 0,18550935 |
| Panthera pardus japonensis KJ866876 | Mustela nigripes NC024942 1         | 0,18550937 |
| Felis silvestris lybica KP202275 4  | Arctocepalus australis MG023139 1   | 0,18550953 |
| Odocoileus manul NC028323 1         | Arctocepalus australis MG023139 1   | 0,18550986 |
| Lynx pardinus NC028319 161          | Arctocepalus townsendi NC008420 1   | 0,18551016 |
| Meles anakuma NC009677 1            | Canis adustus KT448271 1            | 0,18551038 |
| Vulpes corsac NC023958 1            | Profelis aurata NC028299 1          | 0,18551049 |
| Mustela nivalis T306 5              | Canis anthus NC027956 2             | 0,18551135 |
| Viverricula indica NC025296 2       | Urocyon cinereoargenteus NC026723 2 | 0,18551151 |
| Paguma larvata PDD511 2             | Nyctereutes procyonoides NC013700 3 | 0,18551162 |
| Prionailurus rubiginosus NC028304 2 | Lontra canadensis SRR10409165 1     | 0,18551247 |
| Viverricula indica KX891745 1       | Otocyon megalotis SAF1 2            | 0,18551247 |
| Parahaena brunnea NC038159 15       | Mustela nigripes NC024942 1         | 0,1855125  |
| Tremarctos ornatus NC009969 2       | Puma yagouaroundi NC028311 1        | 0,18551286 |
| Ursus arctos EU497665 29            | Smilodon populator MF871700 1       | 0,18551296 |
| Ursus arctos prunosus MG066703 3    | Melogale moschata V0735A 1          | 0,18551438 |
| Lynx rufus NC014456 3               | Aonyx cinerea NC035814 2            | 0,18551499 |
| Ursus thibetanus mupinensis NC00879 | Aonyx cinerea NC035814 2            | 0,185516   |
| Viverricula indica KX891751 1       | Ursus maritimus GU573488 Svalbard   | 0,18551646 |
| Ursus arctos isabellinus 1885 2     | Aonyx cinerea NC035814 2            | 0,18551651 |
| Phoca vitulina NC001325 1           | Paradoxurus hermaphroditus NC03959  | 0,18551716 |
| Prionailurus rubiginosus NC028304 2 | Lutrogale perspicillata NC035811 1  | 0,18551737 |
| Puma yagouaroundi NC028311 1        | Aonyx cinerea NC035814 2            | 0,1855185  |
| Panthera onca NC022842 1            | Callorhinus ursinus NC008415 1      | 0,18551853 |
| Viverricula indica KX891745 1       | Otaria byronia OTAB 1               | 0,18551907 |
| Ursus arctos prunosus MG066703 3    | Poecilogale albinucha T602 1        | 0,18552054 |
| Puma yagouaroundi NC028311 1        | Otaria byronia OTAB 1               | 0,1855215  |
| Ursus arctos GU573486 5             | Aonyx cinerea NC035814 2            | 0,18552235 |
| Speothos venaticus C48 2            | Paradoxurus jerdoni MH464793 1      | 0,18552303 |
| Panthera onca KP202264 2            | Ictonyx striatus T299 1             | 0,18552479 |
| Proteles cristata T393 6            | Phoca groenlandica NC008429 54      | 0,18552575 |
| Zalophus wollebaeki SRR4431565 1    | Pardofelis marmorata NLN3 2         | 0,18552633 |
| Procyon lotor AB462046 3            | Helarctos malayanus NC009968 2      | 0,18552773 |
| Xenogale naso C07XAR110 1           | Canis lupus chanco NC010340 4       | 0,18552962 |
| Lycan pictus NC028427 2             | Catopuma temminckii NC027115 41     | 0,18552993 |
| Genetta genetta T297 1              | Canis aureus KT448274 1             | 0,1855302  |
| Gulo gulo NC009685 3                | Eupleres goudotii D128 1            | 0,18553238 |
| Ursus thibetanus formosanus NC0093  | Felis catus NC001700 2              | 0,18553273 |
| Ursus spelaeus EU327344 13          | Paguma larvata PDD511 2             | 0,18553354 |
| Prionailurus rubiginosus NC028304 2 | Galictis vittata T412 1             | 0,18553446 |
| Zalophus wollebaeki SRR4431565 1    | Galictis vittata T412 1             | 0,185535   |
| Ursus thibetanus formosanus NC0093  | Lycan pictus NC028427 2             | 0,18553594 |
| Procyon lotor AB462046 3            | Arctocepalus forsteri NC004023 28   | 0,185536   |
| Mungos mungo/gambianus SRR77048     | Arctocepalus forsteri NC004023 28   | 0,18553644 |
| Ursus thibetanus laniger MH281753 2 | Odocoileus manul NC028323 1         | 0,18553661 |
| Puma yagouaroundi NC028311 1        | Helarctos malayanus NC009968 2      | 0,18553731 |
| Panthera onca NC022842 1            | Canis aureus KT448274 1             | 0,18554135 |
| Zalophus californianus NC008416 1   | Felis chaus NC028307 1              | 0,18554144 |
| Zalophus wollebaeki SRR4431565 1    | Leopardus colocolo NC028314 1       | 0,18554789 |
| Ursus arctos EU497665 29            | Civettictis civetta NC03378 1       | 0,18555641 |
| Urva javanica T413 1                | Enhydra lutris NC009692 1           | 0,18555781 |
| Melogale moschata V0735A 1          | Eupleres goudotii D128 1            | 0,18556079 |
| Meles meles T303 3                  | Bdeogale nigripes GLC15 1           | 0,18556149 |
| Mustela itatsi NC034330 19          | Urva brachyura KY117547 1           | 0,18556403 |
| Ursus thibetanus formosanus NC0093  | Spilogale putorius NC010497 1       | 0,18556423 |
| Neophoca cinerea NC008419 1         | Eupleres goudotii D128 1            | 0,18556511 |
| Zalophus wollebaeki KP72673 1       | Galidia elegans D146 1              | 0,18556516 |
| Galidictis fasciata DM333 1         | Callorhinus ursinus NC008415 1      | 0,18556729 |
| Xenogale naso C07XAR110 1           | Aonyx cinerea NC035814 2            | 0,18556747 |
| Mustela nigripes NC024942 1         | Galidictis fasciata DM333 1         | 0,18556778 |
| Cynogale bennetti KY17544 1         | Ailuurus fulgens NC011124 1         | 0,18556787 |
| Prionodon linsang ERR2391707 1      | Canis anthus NC027956 2             | 0,18556871 |
| Vulpes zerdia KJ603240 1            | Mustela frenata NC020640 1          | 0,18556958 |
| Civettictis civetta GLC19 1         | Arctocepalus townsendi NC008420 1   | 0,18557176 |
| Viverricula indica KX891751 1       | Martes americana NC020642 1         | 0,18557194 |
| Prionodon pardicolor NC024569 2     | Lutra sumatrana NC035810 1          | 0,18557294 |
| Martes zibellina NC011579 39        | Cryptoprocta ferox CFC13 1          | 0,18557322 |
| Profelis aurata NC028299 1          | Meles anakuma NC009677 1            | 0,18557325 |
| Leopardus guigna NC028321 1         | Conepatus chinga NC042596 1         | 0,18557341 |
| Prionailurus planiceps NC028312 6   | Ailuurus fulgens NC011124 1         | 0,18557352 |
| Melogale moschata NC020644 1        | Galidia elegans D146 1              | 0,18557358 |
| Smilodon populator MF871700 1       | Arctocepalus gazella BK010918 1     | 0,18557388 |
| Martes americana NC020642 1         | Ichneumia albicauda T603 1          | 0,18557437 |
| Mustela sibirica AP017394 11        | Hyaena hyaena NC020669 1            | 0,18557473 |
| Mustela putorius NC020638 4         | Cryptoprocta ferox CFC13 1          | 0,18557544 |
| Parahaena brunnea NC038159 15       | Lutra sumatrana NC035810 1          | 0,18557568 |
| Ursus arctos GU573491 207           | Fossa fossana D350 1                | 0,18557583 |
| Prionailurus rubiginosus NC028304 2 | Arctocepalus townsendi NC008420 1   | 0,18557666 |
| Vulpes corsac NC023958 1            | Leopardus wiedii NC028318 1         | 0,18557738 |
| Ursus arctos isabellinus 1885 2     | Chrotogale owstoni T607 1           | 0,18557759 |
| Vulpes ferrillata NC027935 1        | Felis silvestris lybica KP202275 4  | 0,18557778 |
| Galerella sanguinea T378 1          | Arctocepalus pusillus NC008417 1    | 0,18557829 |
| Tremarctos ornatus NC009969 2       | Leopardus jacobita NC028322 1       | 0,18557836 |
| Ursus arctos isabellinus 1885 2     | Phocarcos hookeri NC008418 1        | 0,18557923 |
| Vulpes zerdia KJ603240 1            | Prionailurus viverrinus NC028305 1  | 0,18557929 |
| Leopardus pardalis T262 1           | Arctocepalus gazella BK010918 1     | 0,18557984 |
| Lycalopex securea KT448284 1        | Arctotherium sp NC030174 1          | 0,18557984 |
| Ursus arctos isabellinus 1885 2     | Lutra sumatrana NC035810 1          | 0,1855803  |
| Poecilogale albinucha T602 1        | Crossarchus platycephalus C7R66 1   | 0,18558055 |
| Proteles cristata T393 6            | Lutra lutra LC050126 1              | 0,18558128 |
| Vulpes ferrillata NC027935 1        | Catopuma badia NC028300 1           | 0,18558149 |
| Martes martes T302 3                | Cryptoprocta ferox CFC13 1          | 0,18558159 |
| Genetta genetta T297 1              | Arctotherium sp NC030174 1          | 0,18558227 |
| Viverra tangalunga MH464792 1       | Ursus arctos isabellinus 1885 2     | 0,18558261 |
| Viverra tangalunga MH464792 1       | Ursus arctos EU497665 29            | 0,18558267 |
| Galictis vittata T412 1             | Arctocepalus forsteri KT693377 17   | 0,1855848  |
| Ursus arctos prunosus MG066703 3    | Mustela altaica NC021751 1          | 0,18558532 |
| Lutra lutra NC011358 9              | Helarctos malayanus NC009968 2      | 0,18558556 |
| Mustela nivalis T306 5              | Genetta genetta T297 1              | 0,18558642 |
| Otaria byronia OTAB 1               | Catopuma temminckii NC027115 41     | 0,18558677 |
| Profelis aurata NC028299 1          | Martes martes T302 3                | 0,18558775 |

|                                       |                                      |            |
|---------------------------------------|--------------------------------------|------------|
| Leopardus pardalis NC028315 1         | Galidia elegans D146 1               | 0,15003183 |
| Lynx canadensis NC028313 1            | Hyaena hyaena NC020669 1             | 0,15003644 |
| Prionailurus planiceps KY682741 4     | Diplogale hosei MH464790 1           | 0,15006764 |
| Viverra zibetha T609 1                | Atilax paludinosus T606 1            | 0,15008818 |
| Fossa fossana D350 1                  | Catopuma temminckii NC027115 41      | 0,15009837 |
| Profelis aurata NC028299 1            | Crossarchus platycephalus C7R66 1    | 0,15009242 |
| Mungotictis decemlineata NC027828 1   | Genetta genetta T297 1               | 0,15009262 |
| Mungotictis decemlineata NC027828 1   | Hyaena hyaena NC020669 1             | 0,15009606 |
| Salanoia concolor D378 1              | Caracal caracal NC028306 1           | 0,15009841 |
| Salanoia concolor D378 1              | Leptailurus serval NC028316 1        | 0,15009886 |
| Viverricula indica XK891751 1         | Prionodon pardicolor NC024569 2      | 0,15009941 |
| Felis silvestris lybica KP202275 4    | Cryptoprocta ferox CFC13 1           | 0,15010105 |
| Prionodon pardicolor NC024569 2       | Genetta servalina NC024568 2         | 0,15010113 |
| Prionodon pardicolor NC024569 2       | Lynx canadensis NC028313 1           | 0,15010241 |
| Prionodon pardicolor NC024569 2       | Felis catus NC001700 2               | 0,15010284 |
| Genetta abyssinica MG489822 1         | Atilax paludinosus T606 1            | 0,15011761 |
| Urva semitorquata MH464789 1          | Genetta abyssinica MG489822 1        | 0,15012553 |
| Prionodon linsang ERR2391707 1        | Lynx pardinus NC028319 161           | 0,15015407 |
| Viverra zibetha T609 1                | Mungos mungo MMC7 1                  | 0,15015526 |
| Mungotictis decemlineata NC027828 1   | Homotherium latidens MF871702 3      | 0,15015839 |
| Pardofelis marmorata NLN3 2           | Fossa fossana D350 1                 | 0,15015897 |
| Parahyaena brunnea NC038159 15        | Galerella sanguinea T378 1           | 0,15016314 |
| Prionodon linsang ERR2391707 1        | Genetta abyssinica MG489822 1        | 0,15016373 |
| Fossa fossana D350 1                  | Crocota crocata NC020670 3           | 0,15016565 |
| Helogale parvula SRR7637809 1         | Crocota crocata NC020670 3           | 0,15016623 |
| Lynx lynx NC027083 4                  | Hyaena hyaena NC020669 1             | 0,15017175 |
| Urva javanica/auripunctata NC006835 1 | Cryptoprocta ferox CFC13 1           | 0,1501946  |
| Lynx pardinus NC028319 161            | Chrotogale owstoni T607 1            | 0,15021801 |
| Mungos mungo MMC7 1                   | Leptailurus serval NC028316 1        | 0,15022567 |
| Prionailurus rubiginosus NC028304 2   | Cynictis penicillata T375 1          | 0,15022591 |
| Felis nigripes NC028309 1             | Crossarchus platycephalus C7R66 1    | 0,15022594 |
| Paradoxurus hermaphroditus NC039591 1 | Felis margarita NC028308 1           | 0,15022697 |
| Leptailurus serval NC028316 1         | Crossarchus platycephalus C7R66 1    | 0,15022707 |
| Leptailurus serval NC028316 1         | Urva semitorquata MH464789 1         | 0,15022722 |
| Paradoxurus hermaphroditus NLNC 1     | Felis margarita NC028308 1           | 0,15022734 |
| Mungos mungo/gambianus SRR7704821 1   | Leopardus tigrinus NC028317 1        | 0,15022829 |
| Arctotherium sp NC030174 1            | Ailuropoda melanoileuca NC009492 5   | 0,15022835 |
| Viverricula indica XK891745 1         | Panthera uncia KP202269 1            | 0,15022881 |
| Leopardus guigna NC028321 1           | Atilax paludinosus T606 1            | 0,15022916 |
| Viverra zibetha T609 1                | Prionodon pardicolor NC024569 2      | 0,15023547 |
| Prionailurus viverrinus NC028305 1    | Galidictis fasciata DM333 1          | 0,15023614 |
| Prionodon linsang ERR2391707 1        | Leopardus colocolo NC028314 1        | 0,15023682 |
| Viverricula indica NC025296 2         | Panthera tigris amoyensis NC014770 2 | 0,15023839 |
| Leopardus pardalis NC028315 1         | Hyaena hyaena NC020669 1             | 0,15024161 |
| Pardofelis marmorata NLN3 2           | Arctictis bitorquatus T605 2         | 0,15024196 |
| Homotherium latidens MF871702 3       | Crossarchus platycephalus C7R66 1    | 0,15024716 |
| Puma concolor NC016470 22             | Diplogale hosei MH464790 1           | 0,1502735  |
| Prionodon linsang ERR2391707 1        | Leopardus wiedii NC028318 1          | 0,15028745 |
| Mungos mungo MMC7 1                   | Homotherium latidens MF871702 3      | 0,15028824 |
| Viverricula indica XK891745 1         | Suricata suricatta SSM10 1           | 0,15028998 |
| Genetta servalina NC024568 2          | Cynictis penicillata T375 1          | 0,15029024 |
| Paradoxurus jerdoni MH464793 1        | Leopardus pardalis NC028315 1        | 0,15029196 |
| Neofelis nebulosa NC008450 3          | Civettictis civetta NC033378 1       | 0,15029351 |
| Paguma larvata PDD511 2               | Felis catus NC001700 2               | 0,15029542 |
| Galidictis fasciata DM333 1           | Catopuma temminckii NC027115 41      | 0,15029638 |
| Hyaena hyaena NC020669 1              | Eupleres goudotii D128 1             | 0,15029664 |
| Parahyaena brunnea NC038159 15        | Xenogale naso C07XAR110 1            | 0,15029696 |
| Paradoxurus hermaphroditus NLNC 1     | Leopardus guigna NC028321 1          | 0,15030189 |
| Parahyaena brunnea NC038159 15        | Lynx lynx NC027083 4                 | 0,15030819 |
| Galidictis fasciata DM333 1           | Acinonyx jubatus NC005212 3          | 0,15031619 |
| Viverricula indica XK891745 1         | Panthera leo NERO 19                 | 0,1503274  |
| Paradoxurus hermaphroditus NLNC 1     | Fossa fossana D350 1                 | 0,15035592 |
| Puma concolor NC016470 22             | Prionodon linsang ERR2391707 1       | 0,15035631 |
| Viverra zibetha T609 1                | Prionodon linsang ERR2391707 1       | 0,15035711 |
| Genetta genetta T297 1                | Crossarchus platycephalus C7R66 1    | 0,15035947 |
| Mungos mungo MMC7 1                   | Catopuma badia NC028300 1            | 0,15036002 |
| Eupleres goudotii D128 1              | Catopuma badia NC028300 1            | 0,15036041 |
| Prionodon linsang ERR2391707 1        | Catopuma badia NC028300 1            | 0,15036213 |
| Felis nigripes NC028309 1             | Eupleres goudotii D128 1             | 0,15036231 |
| Paradoxurus jerdoni MH464793 1        | Caracal caracal NC028306 1           | 0,1503624  |
| Salanoia concolor D378 1              | Otocolobus manul NC028323 1          | 0,15036853 |
| Urocyon cinereoargenteus NC026723 21  | Cuon alpinus NC013445 3              | 0,15036917 |
| Leopardus geoffroyi NC028320 1        | Cryptoprocta ferox CFC13 1           | 0,15037058 |
| Parahyaena brunnea NC038159 15        | Lynx canadensis NC028313 1           | 0,15037356 |
| Genetta abyssinica MG489822 1         | Cynictis penicillata T375 1          | 0,15038618 |
| Neofelis nebulosa NC008450 3          | Genetta servalina NC024568 2         | 0,15039267 |
| Viverricula indica XK891745 1         | Panthera pardus NC010641 5           | 0,15039456 |
| Hemigale derbyanus MH464791 1         | Eupleres goudotii D128 1             | 0,15041208 |
| Viverricula indica XK891751 1         | Urva javanica T413 1                 | 0,15042467 |
| Proteles cristata T393 6              | Fossa fossana D350 1                 | 0,15043159 |
| Prionailurus bengalensis CKM45 20     | Mungos mungo/gambianus SRR7704821 1  | 0,15043217 |
| Prionodon linsang ERR2391707 1        | Acinonyx jubatus NC005212 3          | 0,15043534 |
| Viverricula indica XK891745 1         | Prionodon pardicolor NC024569 2      | 0,15043578 |
| Ichneumia albicauda T603 1            | Civettictis civetta GLC19 1          | 0,15043625 |
| Parahyaena brunnea NC038159 15        | Cryptoprocta ferox CFC13 1           | 0,15043934 |
| Viverra zibetha T609 1                | Neofelis nebulosa NC008450 3         | 0,15046045 |
| Urva javanica/auripunctata NC006835 1 | Catopuma badia NC028300 1            | 0,15046078 |
| Urva javanica T413 1                  | Genetta servalina NC024568 2         | 0,15049244 |
| Puma concolor NC016470 22             | Mungos mungo MMC7 1                  | 0,15049495 |
| Leopardus pardalis T262 1             | Urva javanica T413 1                 | 0,1504955  |
| Felis margarita NC028308 1            | Crossarchus platycephalus C7R66 1    | 0,15049557 |
| Fossa fossana D350 1                  | Felis nigripes NC028309 1            | 0,15049568 |
| Paradoxurus jerdoni MH464793 1        | Lynx pardinus NC028319 161           | 0,15049601 |
| Fossa fossana D350 1                  | Felis chaus NC028307 1               | 0,15049605 |
| Panthera leo spelaea KX258452 2       | Genetta genetta T297 1               | 0,15049675 |
| Leopardus geoffroyi NC028320 1        | Urva semitorquata MH464789 1         | 0,15049765 |
| Panthera pardus japonensis KJ866876 8 | Mungotictis decemlineata NC027828 1  | 0,15050039 |
| Galidictis fasciata DM333 1           | Caracal caracal NC028306 1           | 0,15050255 |
| Prionodon pardicolor NC024569 2       | Civettictis civetta GLC19 1          | 0,15050304 |
| Prionailurus bengalensis CKM45 20     | Parahyaena brunnea NC038159 15       | 0,15052186 |
| Pardofelis marmorata NLN3 2           | Hemigale derbyanus MH464791 1        | 0,15053008 |
| Salanoia concolor D378 1              | Panthera leo NERO 19                 | 0,15053426 |
| Urva brachyura KY117547 1             | Galidia elegans D146 1               | 0,15055574 |

|                                      |                                      |            |
|--------------------------------------|--------------------------------------|------------|
| Ursus arctos EU497665 29             | Poecilogale albinucha T602 1         | 0,18558812 |
| Prionailurus bengalensis NC028301 12 | Otaria byronia OTAB 1                | 0,18558837 |
| Panthera onca NC022842 1             | Canis latrans NC008093 7             | 0,18558942 |
| Neovison vison NC020641 3            | Caracal caracal NC028306 1           | 0,18558961 |
| Phocarcctos hookeri NC008418 1       | Melurus ursinus NC009970 2           | 0,18559001 |
| Pardofelis marmorata NLN3 2          | Lycan pictus NC028427 2              | 0,18559152 |
| Ictonyx striatus T299 1              | Felis nigripes NC028309 1            | 0,18559203 |
| Ursus thibetanus mupinensis NC00875  | Leptailurus serval NC028316 1        | 0,18559307 |
| Lycan pictus NC028427 2              | Leopardus geoffroyi NC028320 1       | 0,18559609 |
| Ursus spelaeus EU327344 13           | Phocarcctos hookeri NC008418 1       | 0,18559693 |
| Ursus spelaeus EU327344 13           | Lynx rufus NC014456 3                | 0,18559718 |
| Lynx canadensis NC028313 1           | Galictis vittata T412 1              | 0,18559775 |
| Ursus spelaeus EU327344 13           | Felis margarita NC028308 1           | 0,18559808 |
| Meles anakuma NC009677 1             | Canis lupus familiaris NC002008 1231 | 0,18560055 |
| Lynx rufus NC014456 3                | Helarctos malayanus NC009968 2       | 0,18560056 |
| Prionodon linsang ERR2391707 1       | Canis lupus familiaris NC002008 1231 | 0,18560109 |
| Leopardus pardalis NC028315 1        | Galictis vittata T412 1              | 0,18560195 |
| Ursus thibetanus laniger MH281753 2  | Puma concolor NC016470 22            | 0,18560244 |
| Puma concolor NC016470 22            | Chrysocyon brachyurus NC024172 1     | 0,18560331 |
| Melurus ursinus NC009970 2           | Leopardus wiedii NC028318 1          | 0,18560362 |
| Genetta abyssinica MG489822 1        | Arctocepalus australis MG023139 1    | 0,18560392 |
| Leopardus geoffroyi NC028320 1       | Helarctos malayanus NC009968 2       | 0,18560626 |
| Gulo gulo NC009685 3                 | Galidictis fasciata DM333 1          | 0,18560889 |
| Lynx lynx NC027083 4                 | Arctocepalus forsteri NC004023 28    | 0,18561137 |
| Pardofelis marmorata NLN3 2          | Canis lupus familiaris NC002008 1231 | 0,1856126  |
| Leopardus wiedii NC028318 1          | Cuon alpinus NC013445 3              | 0,18561959 |
| Ursus spelaeus EU327344 13           | Canis mesomelas KT448280 1           | 0,18562092 |
| Viverra tangalunga MH464792 1        | Civettictis civetta NC033378 1       | 0,18562368 |
| Ursus arctos isabellinus 1885 2      | Xenogale naso C07XAR110 1            | 0,18562466 |
| Lutra lutra NC011358 9               | Conepatus chinga NC042596 1          | 0,18562539 |
| Fossa fossana D350 1                 | Atilax paludinosus T606 1            | 0,18562593 |
| Martes melampus NC009678 1           | Xenogale naso C07XAR110 1            | 0,18562917 |
| Martes americana NC020642 1          | Mungos mungo/gambianus SRR77048      | 0,18562949 |
| Mustela putorius NC020638 4          | Urva javanica T413 1                 | 0,18562962 |
| Melagale moschata KP72673 1          | Bassaricyon neblina SRX1097850 1     | 0,18562999 |
| Crossarchus platycephalus C7R66 1    | Atilax paludinosus T606 1            | 0,18563074 |
| Mustela sibirica NC020637 6          | Canis anthus NC027956 2              | 0,18563277 |
| Galerella sanguinea T378 1           | Martes martes T302 3                 | 0,18563382 |
| Mungos mungo MMC7 1                  | Fossa fossana D350 1                 | 0,18563519 |
| Lutrogale perspicillata NC035811 1   | Conepatus chinga NC042596 1          | 0,18563521 |
| Smilodon populator MF871700 1        | Mustela nigripes NC024942 1          | 0,18563636 |
| Vulpes ferrilata NC027935 1          | Enhydra lutris NC009692 1            | 0,18563691 |
| Genetta genetta T297 1               | Acinonyx jubatus NC005212 3          | 0,18563727 |
| Ursus americanus JX196366 3          | Ichneumia albicauda T603 1           | 0,18563788 |
| Martes melampus NC009678 1           | Arctocepalus australis MG023139 1    | 0,18563958 |
| Mustela altaica NC021751 1           | Galerella sanguinea T378 1           | 0,18564039 |
| Viverra tangalunga MH464792 1        | Enhydra lutris NC009692 1            | 0,18564071 |
| Panthera pardus japonensis KJ866876  | Mustela altaica NC021751 1           | 0,18564276 |
| Tremarctos ornatus NC009969 2        | Ictonyx striatus T299 1              | 0,18564357 |
| Mungos mungo MMC7 1                  | Crossarchus platycephalus C7R66 1    | 0,18564397 |
| Ursus thibetanus mupinensis NC00875  | Felis catus NC001700 2               | 0,18564451 |
| Vulpes corsac NC023958 1             | Mustela erminea T305 2               | 0,18564467 |
| Panthera uncia NC010638 1            | Felis nigripes NC028309 1            | 0,18564485 |
| Vulpes ferrilata NC027935 1          | Aonyx cinerea NC035814 2             | 0,18564606 |
| Viverricula indica XK891745 1        | Canis mesomelas KT448280 1           | 0,18564694 |
| Martes martes T302 3                 | Felis nigripes NC028309 1            | 0,18564703 |
| Lontra canadensis SRR10409165 1      | Arctocepalus australis MG023139 1    | 0,18564726 |
| Hemigale derbyanus MH464791 1        | Lutra sumatrana NC035810 1           | 0,18564774 |
| Ursus maritimus NC003428 31          | Catopuma badia NC028300 1            | 0,18564795 |
| Neophoca cinerea NC008419 1          | Neophoca cinerea NC008419 1          | 0,18564862 |
| Prionailurus rubiginosus NC028304 2  | Melagale moschata V0735A 1           | 0,18564893 |
| Ursus arctos GU573486 5              | Leptailurus serval NC028316 1        | 0,18564928 |
| Neophoca cinerea NC008419 1          | Neophoca cinerea NC008419 1          | 0,18564932 |
| Otocolobus manul NC028323 1          | Arctocepalus pusillus NC008417 1     | 0,18565048 |
| Catopuma temminckii NC027115 41      | Felis silvestris lybica KP202275 4   | 0,18565057 |
| Lutrogale perspicillata NC035811 1   | Lontra canadensis CKM45 20           | 0,18565062 |
| Prionailurus bengalensis CKM45 20    | Procyon lotor AB462049 4             | 0,18565169 |
| Viverricula indica XK891745 1        | Ursus arctos isabellinus 1885 2      | 0,18565272 |
| Neovison vison NC020641 3            | Hyaena hyaena NC020669 1             | 0,18565315 |
| Ursus arctos GU573486 5              | Meles anakuma NC009677 1             | 0,18565346 |
| Panthera leo spelaea KX258452 2      | Mustela erminea T305 2               | 0,18565485 |
| Viverricula indica XK891751 1        | Speothos venaticus C48 2             | 0,18565539 |
| Zalophus wolfebaeki SRR4431565 1     | Viverricula indicus XK891751 1       | 0,18565886 |
| Speothos venaticus C48 2             | Prionailurus bengalensis NC028301 12 | 0,18565923 |
| Vulpes ferrilata NC027935 1          | Leopardus colocolo NC028314 1        | 0,18566331 |
| Ursus arctos AP012576 6              | Lutra sumatrana NC035810 1           | 0,18566382 |
| Urva brachyura KY117547 1            | Canis lupus familiaris NC002008 1231 | 0,18566661 |
| Ursus thibetanus thibetanus NC011113 | Paradoxurus jerdoni MH464793 1       | 0,18566664 |
| Ursus arctos GU573491 207            | Canis adustus KT448271 1             | 0,18566762 |
| Zalophus californianus NC008416 1    | Galidictis fasciata DM333 1          | 0,18566798 |
| Prionailurus viverrinus NC028305 1   | Chrysocyon brachyurus NC024172 1     | 0,18566956 |
| Ursus spelaeus NC011112 8            | Felis chaus NC028307 1               | 0,18566996 |
| Helogale parvula SRR7637809 1        | Canis adustus KT448271 1             | 0,18567076 |
| Ursus arctos GU573486 5              | Arctocepalus forsteri NC004023 28    | 0,18567316 |
| Melurus ursinus NC009970 2           | Leptailurus serval NC028316 1        | 0,18567319 |
| Ursus spelaeus NC011112 8            | Leopardus guigna NC028321 1          | 0,18567386 |
| Gulo gulo NC009685 3                 | Canis latrans NC008093 7             | 0,18567483 |
| Eumetopias jubatus NC004030 10       | Bdeogale nigripes GLC15 1            | 0,18567815 |
| Zalophus californianus NC008416 1    | Leopardus guigna NC028321 1          | 0,18567896 |
| Mustela nivialis T306 5              | Cuon alpinus NC013445 3              | 0,18568984 |
| Ursus maritimus GU573488 Svalbard    | Civettictis civetta NC033378 1       | 0,18569121 |
| Martes melampus NC009678 1           | Xenogale naso C07XAR110 1            | 0,18569346 |
| Mustela nigripes NC024942 1          | Eupleres goudotii D128 1             | 0,18569705 |
| Ursus arctos GU573486 5              | Civettictis civetta NC033378 1       | 0,18569756 |
| Mustela kathiah NC023210 1           | Xenogale naso C07XAR110 1            | 0,18569845 |
| Tremarctos ornatus NC009969 2        | Lutrogale perspicillata NC035811 1   | 0,18569855 |
| Bdeogale nigripes GLC15 1            | Arctocepalus forsteri KT693377 17    | 0,18569884 |
| Procyon lotor AB462049 4             | Arctocepalus townsendi NC008420 1    | 0,18569928 |
| Vulpes zerdia KJ603240 1             | Melagale moschata KP72673 1          | 0,18569999 |
| Xenogale naso C07XAR110 1            | Canis latrans NC008093 7             | 0,18570009 |
| Procyon lotor AB462049 4             | Arctocepalus forsteri KT693377 17    | 0,18570016 |
| Lynx lynx NC027083 4                 | Canis mesomelas KT448280 1           | 0,18570086 |
| Ursus spelaeus EU327344 13           | Spilogale putorius NC010497 1        | 0,18570104 |

|                                          |                                       |            |
|------------------------------------------|---------------------------------------|------------|
| Prionailurus bengalensis NC028301 12     | Mungos mungo MMC7 1                   | 0,15056261 |
| Lynx canadensis NC028313 1               | Eupleres goudotii D128 1              | 0,15056427 |
| Prionailurus viverrinus NC028305 1       | Urva semitorquata MH464789 1          | 0,15056579 |
| Panthera onca KP202264 2                 | Genetta genetta T297 1                | 0,15056734 |
| Salanoia concolor D378 1                 | Pardofelis marmorata NLN3 2           | 0,15056862 |
| Viverricula indica XK891751 1            | Ichneumia albicauda T603 1            | 0,15056896 |
| Prionailurus planiceps KY682741 4        | Galidictis fasciata DM333 1           | 0,15056908 |
| Felis margarita NC028308 1               | Cryptoprocta ferox CFC13 1            | 0,15057254 |
| Puma concolor NC016470 22                | Cryptoprocta ferox CFC13 1            | 0,15057282 |
| Prionodon pardicolor NC024569 2          | Civettictis civetta NC033378 1        | 0,15060516 |
| Paradoxurus hermaphroditus NC039591 1    | Eupleres goudotii D128 1              | 0,15062572 |
| Phocarcus hookeri NC008418 1             | Mirounga angustirostris SRR10331586 1 | 0,15062763 |
| Neophoca cinerea NC008419 1              | Mirounga angustirostris SRR10331586 1 | 0,15062882 |
| Mungos mungo/gambianus SRR7704821 1      | Catopuma temminckii NC027115 41       | 0,15062925 |
| Paradoxurus hermaphroditus NC039591 1    | Felis silvestris lybica KP202275 4    | 0,15063083 |
| Prionailurus bengalensis NC028301 12     | Bdeogale nigripes GLC15 1             | 0,15063117 |
| Viverricula indica XK891751 1            | Panthera onca KP202264 2              | 0,1506325  |
| Mungos mungo MMC7 1                      | Leopardus geoffroyi NC028320 1        | 0,15063263 |
| Parahyaena brunnea NC038159 15           | Atilax paludinosus T606 1             | 0,15063322 |
| Parahyaena brunnea NC038159 15           | Cynictis penicillata T375 1           | 0,15063509 |
| Salanoia concolor D378 1                 | Profelis aurata NC028299 1            | 0,15063734 |
| Parahyaena brunnea NC038159 15           | Mungos mungo MMC7 1                   | 0,15063737 |
| Profelis aurata NC028299 1               | Galidictis fasciata DM333 1           | 0,15063755 |
| Urocyon littoralis catalinae KP129018 15 | Cuon alpinus NC013445 3               | 0,15063863 |
| Viverricula indica XK891745 1            | Panthera tigris NC010642 35           | 0,1506393  |
| Profelis aurata NC028299 1               | Diplogale hosei MH464790 1            | 0,15067005 |
| Leopardus guigna NC028321 1              | Diplogale hosei MH464790 1            | 0,1506831  |
| Viverricula indica XK891745 1            | Xenogale naso CO7XAR110 1             | 0,1506936  |
| Felis chaus NC028307 1                   | Diplogale hosei MH464790 1            | 0,15069535 |
| Lynx rufus NC014456 3                    | Helogale parvula SRR7637809 1         | 0,15069664 |
| Paradoxurus jerdoni MH464793 1           | Leopardus jacobita NC028322 1         | 0,15069667 |
| Viverricula indica XK891751 1            | Mungotictis decemlineata NC027828 1   | 0,15069844 |
| Felis silvestris lybica KP202275 4       | Eupleres goudotii D128 1              | 0,15069906 |
| Prionodon pardicolor NC024569 2          | Paguma larvata PDD511 2               | 0,15070577 |
| Otocolobus manul NC028323 1              | Cryptoprocta ferox CFC13 1            | 0,15070786 |
| Panthera leo NERO 19                     | Genetta genetta T297 1                | 0,15073277 |
| Nandinia binotata NC024567 1             | Urva brachyura KY117547 1             | 0,15075411 |
| Viverricula indica XK891745 1            | Eupleres goudotii D128 1              | 0,15075813 |
| Puma yagouaroundi NC028311 1             | Prionodon linsang ERR2391707 1        | 0,1507605  |
| Viverricula indica XK891751 1            | Cynictis penicillata T375 1           | 0,15076111 |
| Paradoxurus jerdoni MH464793 1           | Felis catus NC028307 1                | 0,15076648 |
| Mungos mungo/gambianus SRR7704821 1      | Hyena hyaena NC020669 1               | 0,15076655 |
| Parahyaena brunnea NC038159 15           | Bdeogale nigripes GLC15 1             | 0,15076922 |
| Salanoia concolor D378 1                 | Felis nigripes NC028309 1             | 0,15077087 |
| Smilodon populator MF871700 1            | Diplogale hosei MH464790 1            | 0,15080331 |
| Smilodon populator MF871700 1            | Eupleres goudotii D128 1              | 0,15082301 |
| Urva semitorquata MH464789 1             | Catopuma temminckii NC027115 41       | 0,15083061 |
| Catopuma temminckii NC027115 41          | Atilax paludinosus T606 1             | 0,15083146 |
| Viverra zibetha T609 1                   | Galidia elegans D146 1                | 0,15083283 |
| Prionailurus rubiginosus NC028304 2      | Eupleres goudotii D128 1              | 0,15083462 |
| Prionailurus bengalensis CKM45 20        | Hyena hyaena NC020669 1               | 0,15084702 |
| Otocolobus manul NC028323 1              | Diplogale hosei MH464790 1            | 0,15084861 |
| Lynx rufus NC014456 3                    | Chrotogale owstoni T607 1             | 0,15089177 |
| Suricata suricatta SSM10 1               | Prionailurus rubiginosus NC028304 2   | 0,15089905 |
| Puma concolor NC016470 22                | Urva semitorquata MH464789 1          | 0,1508998  |
| Puma yagouaroundi NC028311 1             | Mungos mungo/gambianus SRR7704821 1   | 0,15090007 |
| Paradoxurus jerdoni MH464793 1           | Felis catus NC001700 2                | 0,15090041 |
| Leopardus pardalis NC028315 1            | Helogale parvula SRR7637809 1         | 0,15091039 |
| Profelis aurata NC028299 1               | Atilax paludinosus T606 1             | 0,15091047 |
| Leopardus guigna NC028321 1              | Urva semitorquata MH464789 1          | 0,15091082 |
| Leopardus pardalis T262 1                | Galerella sanguinea T378 1            | 0,15091084 |
| Leopardus wiedii NC028318 1              | Galerella sanguinea T378 1            | 0,15091096 |
| Leopardus jacobita NC028322 1            | Atilax paludinosus T606 1             | 0,15092064 |
| Phoca largha NC008430 1                  | Arctocepalus forsteri NC004023 28     | 0,15093084 |
| Mungotictis decemlineata NC027828 1      | Felis catus NC001700 2                | 0,15094083 |
| Parahyaena brunnea NC038159 15           | Ichneumia albicauda T603 1            | 0,15094628 |
| Prionailurus bengalensis NC028301 12     | Hyena hyaena NC020669 1               | 0,15091212 |
| Eupleres goudotii D128 1                 | Acinonyx jubatus NC005212 3           | 0,15091679 |
| Smilodon populator MF871700 1            | Mungos mungo MMC7 1                   | 0,15091747 |
| Cynictis penicillata T375 1              | Chrotogale owstoni T607 1             | 0,15094915 |
| Urva brachyura KY117547 1                | Genetta servalina NC024568 2          | 0,15096386 |
| Mungos mungo/gambianus SRR7704821 1      | Genetta servalina NC024568 2          | 0,15096398 |
| Felis margarita NC028308 1               | Atilax paludinosus T606 1             | 0,15096772 |
| Paradoxurus hermaphroditus NLNC 1        | Felis silvestris lybica KP202275 4    | 0,15096787 |
| Viverricula indica XK891751 1            | Panthera pardus japonensis KJ866876 8 | 0,15096915 |
| Leopardus pardalis NC028315 1            | Ichneumia albicauda T603 1            | 0,15096942 |
| Prionailurus viverrinus NC028305 1       | Eupleres goudotii D128 1              | 0,15097164 |
| Salanoia concolor D378 1                 | Hyena hyaena NC020669 1               | 0,15097207 |
| Leopardus pardalis T262 1                | Galidia elegans D146 1                | 0,15097463 |
| Viverricula indica XK891745 1            | Panthera tigris amoyensis NC014770 2  | 0,15097632 |
| Prionailurus planiceps NC028312 6        | Cryptoprocta ferox CFC13 1            | 0,15097691 |
| Prionailurus bengalensis NC028301 12     | Urva javanica/auropunctata NC006835 1 | 0,15099879 |
| Halichoerus grypus NC001602 2            | Arctocepalus forsteri NC004023 28     | 0,1510019  |
| Tremarctos ornatus NC009969 2            | Ailuropoda melanoleuca NC009492 5     | 0,15102033 |
| Urva javanica T413 1                     | Civettictis civetta GLC19 1           | 0,15103145 |
| Mungos mungo MMC7 1                      | Lynx lynx NC027083 4                  | 0,15103269 |
| Nandinia binotata NC024567 1             | Galerella sanguinea T378 1            | 0,15103282 |
| Salanoia concolor D378 1                 | Panthera leo spelaea KX258452 2       | 0,15103328 |
| Prionailurus bengalensis NC028301 12     | Cynictis penicillata T375 1           | 0,15103416 |
| Panthera tigris amoyensis NC014770 2     | Genetta servalina NC024568 2          | 0,15104298 |
| Panthera tigris NC010642 35              | Civettictis civetta GLC19 1           | 0,15104339 |
| Felis catus NC001700 2                   | Cryptoprocta ferox CFC13 1            | 0,15104355 |
| Fossa fossana D350 1                     | Arctictis binturong T605 2            | 0,15104519 |
| Prionailurus bengalensis CKM45 20        | Cryptoprocta ferox CFC13 1            | 0,15104747 |
| Galidia elegans D146 1                   | Civettictis civetta NC033378 1        | 0,15106235 |
| Phocarcus hookeri NC008418 1             | Monachus monachus NC0044972 5         | 0,15106243 |
| Prionodon linsang ERR2391707 1           | Civettictis civetta GLC19 1           | 0,15109809 |
| Helogale parvula SRR7637809 1            | Catopuma temminckii NC027115 41       | 0,15110064 |
| Paradoxurus jerdoni MH464793 1           | Leopardus tigrinus NC028317 1         | 0,15110064 |
| Paradoxurus jerdoni MH464793 1           | Lynx lynx NC027083 4                  | 0,15110157 |
| Prionodon linsang ERR2391707 1           | Leopardus geoffroyi NC028320 1        | 0,15112023 |
| Puma yagouaroundi NC028311 1             | Atilax paludinosus T606 1             | 0,15110311 |
| Leopardus geoffroyi NC028320 1           | Helogale parvula SRR7637809 1         | 0,15110423 |

|                                      |                                         |            |
|--------------------------------------|-----------------------------------------|------------|
| Galidia elegans D146 1               | Callorhinus ursinus NC008415 1          | 0,18570124 |
| Vulpes lagopus NC026529 3            | Mustela frenata NC020640 1              | 0,18570128 |
| Panthera onca NC022842 1             | Martes flavigula NC012141 3             | 0,18570133 |
| Mustela putorius NC020638 4          | Galidictis fasciata DM333 1             | 0,1857021  |
| Salanoia concolor D378 1             | Bassariscus sumichrasti SRX1090089 1    | 0,18570215 |
| Salanoia concolor D378 1             | Mustela putorius NC020638 4             | 0,18570228 |
| Procyon lotor AB462046 3             | Atilax paludinosus T606 1               | 0,1857024  |
| Martes pennanti NC020664 16          | Chrotogale owstoni T607 1               | 0,18570268 |
| Salanoia concolor D378 1             | Lutrogale perspicillata NC035811 1      | 0,18570313 |
| Melogale moschata NC020644 1         | Xenogale naso CO7XAR110 1               | 0,18570462 |
| Panthera uncia KP202269 1            | Lutra lutra LC050126 1                  | 0,18570745 |
| Mustela altaica NC021751 1           | Urva javanica T413 1                    | 0,18570775 |
| Viverricula indica NC025296 2        | Arctocepalus forsteri KT693377 17       | 0,18570879 |
| Martes zibellina NC011579 39         | Genetta genetta T297 1                  | 0,18570963 |
| Potos flavus T414 1                  | Panthera pardus japonensis KJ866876 8   | 0,18571028 |
| Ursus arctos EU497665 29             | Martes pennanti NC020664 16             | 0,18571036 |
| Ursus arctos pruinus MG066703 3      | Martes pennanti NC020664 16             | 0,18571042 |
| Mungos mungo MMC7 1                  | Lycyon pictus NC028427 2                | 0,18571118 |
| Prionailurus planiceps KY682741 4    | Arctocepalus townsendi NC008420 1       | 0,18571131 |
| Poecilogale albinucha T602 1         | Catopuma temminckii NC027115 41         | 0,18571182 |
| Melogale moschata U0735A 1           | Felis catus NC001700 2                  | 0,18571213 |
| Parahyaena brunnea NC038159 15       | Melogale moschata KP726273 1            | 0,18571247 |
| Neophoca cinerea NC008419 1          | Lynx lynx NC027083 4                    | 0,18571354 |
| Paguma larvata PDD511 2              | Martes pennanti NC020664 16             | 0,18571359 |
| Neovison vison NC020641 3            | Mungotictis decemlineata NC027828 1     | 0,18571369 |
| Vulpes zerdia KJ603240 1             | Prionailurus bengalensis NC028301 12    | 0,18571398 |
| Martes flavigula NC012141 3          | Lycalopex securae KT448284 1            | 0,18571436 |
| Leopardus guigna NC028321 1          | Arctocepalus gazella BK010918 1         | 0,18571545 |
| Panthera tigris NC010642 35          | Meles leucurus NC039173 4               | 0,18571557 |
| Panthera tigris amoyensis NC014770 2 | Meles leucurus NC039173 4               | 0,18571566 |
| Panthera uncia KP202269 1            | Bassariscus sumichrasti SRX1090089 1    | 0,18571727 |
| Viverricula indica XK891751 1        | Ursus maritimus NC003428 31             | 0,18571846 |
| Panthera onca NC022842 1             | Arctonyx collaris NC020645 1            | 0,18571964 |
| Martes pennanti NC020664 16          | Felis nigripes NC028309 1               | 0,1857197  |
| Lycalopex securae KT448284 1         | Chrotogale owstoni T607 1               | 0,18572029 |
| Ursus arctos GU573491 207            | Otaria byronia OTAB 1                   | 0,18572082 |
| Speothos venaticus C48 2             | Leopardus pardalis T262 1               | 0,18572375 |
| Prionailurus viverrinus NC028305 1   | Otaria byronia OTAB 1                   | 0,18572438 |
| Viverricula indica XK891751 1        | Ursus arctos GU573486 5                 | 0,18572496 |
| Viverricula indica XK891751 1        | Ursus arctos pruinus MG066703 3         | 0,18572518 |
| Arctocepalus forsteri KT693377 17    | Acinonyx jubatus NC005212 3             | 0,18572806 |
| Ursus arctos EU497665 29             | Leopardus geoffroyi NC028320 1          | 0,18572831 |
| Ursus thibetanus thibetanus NC011118 | Canis anthus NC027956 2                 | 0,1857288  |
| Lycyon pictus NC028427 2             | Leopardus guigna NC028321 1             | 0,18573041 |
| Martes americana NC020642 1          | Canis lupus familiaris NC002008 1231    | 0,18573359 |
| Viverra zibetha T609 1               | Arctocepalus forsteri NC004023 28       | 0,18573412 |
| Ursus thibetanus formosanus NC0093   | Prionailurus bengalensis NC028312 6     | 0,18573497 |
| Panthera onca KP202264 2             | Canis aureus KT448274 1                 | 0,18573514 |
| Melurus ursinus NC009970 2           | Lynx lynx NC027083 4                    | 0,18573558 |
| Ursus thibetanus thibetanus NC011118 | Felis nigripes NC028309 1               | 0,18573676 |
| Urva semitorquata MH464789 1         | Gulo gulo NC009685 3                    | 0,18573718 |
| Lynx canadensis NC028313 1           | Chrysocyon brachyurus NC024172 1        | 0,18573742 |
| Ursus thibetanus laniger MH281753 2  | Prionailurus rubiginosus NC028304 2     | 0,18573762 |
| Ursus thibetanus thibetanus NC011118 | Prionailurus thibetanus NC028312 6      | 0,18573773 |
| Prionailurus bengalensis NC028301 12 | Helarctos malayanus NC009968 2          | 0,18573879 |
| Ursus spelaeus NC011112 8            | Leptailurus serval NC028316 1           | 0,18573898 |
| Zalophus californianus NC008416 1    | Viverricula indica XK891751 1           | 0,18574014 |
| Panthera uncia KP202269 1            | Canis lupus chanco NC010340 4           | 0,18574123 |
| Zalophus californianus NC008416 1    | Puma concolor NC016470 22               | 0,18574397 |
| Panthera leo NERO 19                 | Mustela nigripes NC024942 1             | 0,18574554 |
| Lycalopex securae KT448284 1         | Leopardus tigrinus NC028317 1           | 0,18574603 |
| Mustela sibirica AP017394 11         | Cuon alpinus NC013445 3                 | 0,18574636 |
| Zalophus californianus NC008416 1    | Parahyaena brunnea NC038159 15          | 0,18574767 |
| Prionodon linsang ERR2391707 1       | Lycalopex securae KT448284 1            | 0,18575047 |
| Mustela sibirica AP017394 11         | Lycalopex securae KT448284 1            | 0,18575294 |
| Melogale moschata KP726273 1         | Atilax paludinosus T606 1               | 0,18576354 |
| Poecilogale albinucha T602 1         | Nasua nasua NC020647 1                  | 0,18576431 |
| Viverra tangalunga MH464792 1        | Mungos mungo/gambianus SRR77048         | 0,18576494 |
| Mustela sibirica AP017394 11         | Atilax paludinosus T606 1               | 0,18576497 |
| Meles anakuma NC009677 1             | Cynogale bennetti KY117544 1            | 0,18576504 |
| Mustela nigripes NC024942 1          | Atilax paludinosus T606 1               | 0,18576555 |
| Potos flavus T414 1                  | Xenogale naso CO7XAR110 1               | 0,18576726 |
| Crossarchus platycephalus C7R66 1    | Conepatus chinga NC042596 1             | 0,18576822 |
| Lutra lutra NC011358 9               | Genetta genetta T297 1                  | 0,18576941 |
| Viverricula indica XK891745 1        | Callorhinus ursinus NC008415 1          | 0,18576972 |
| Paradoxurus jerdoni MH464793 1       | Arctocepalus australis MG023139 1       | 0,18576974 |
| Vulpes vulpes NC008434 5             | Mustela nigripes NC024942 1             | 0,18577009 |
| Neophoca cinerea NC008419 1          | Lutrogale perspicillata NC035811 1      | 0,18577096 |
| Lynx canadensis NC028313 1           | Ailuurus fulgens styani NC009691 1      | 0,18577272 |
| Martes melampus NC009678 1           | Genetta genetta T297 1                  | 0,18577352 |
| Cynictis penicillata T375 1          | Arctotherium sp NC030174 1              | 0,18577413 |
| Genetta servalina NC024568 2         | Arctocepalus gazella BK010918 1         | 0,18577459 |
| Gulo gulo NC009685 3                 | Canis lupus familiaris NC002008 1231    | 0,18577529 |
| Panthera onca KP202264 2             | Enhydra lutris NC009692 1               | 0,18577543 |
| Mustela nivalis T306 5               | Cynictis penicillata T375 1             | 0,18577668 |
| Ursus arctos EU497665 29             | Arctocepalus australis MG023139 1       | 0,18577738 |
| Poecilogale albinucha T602 1         | Fossa fossana D350 1                    | 0,18577787 |
| Vulpes lagopus NC026529 3            | Lynx lynx NC027083 4                    | 0,18577945 |
| Vulpes lagopus NC026529 3            | Prionailurus planiceps NC028312 6       | 0,18577988 |
| Ommatophoca rossii AY377287etc 1     | Galidia elegans D146 1                  | 0,18578051 |
| Panthera onca KP202264 2             | Canis latrans NC008093 7                | 0,18578057 |
| Viverricula indica NC025296 2        | Urocyon littoralis catalinae KP129018 1 | 0,18578085 |
| Leopardus guigna NC028321 1          | Ailuurus fulgens NC011124 1             | 0,18578124 |
| Tremarctos ornatus NC009969 2        | Felis catus NC001700 2                  | 0,18578175 |
| Proteles cristata T393 6             | Ommatophoca rossii AY377287etc 1        | 0,18578225 |
| Nyctereutes procyonoides NC013700 3  | Neovison vison NC020641 3               | 0,18578255 |
| Prionailurus viverrinus NC028305 1   | Lontra canadensis SRR10409165 1         | 0,18578286 |
| Phocarcus hookeri NC008418 1         | Leopardus wiedii NC028318 1             | 0,18578349 |
| Vulpes corsac NC023958 1             | Leopardus geoffroyi NC028320 1          | 0,18578357 |
| Vulpes vulpes NC008434 5             | Leopardus guigna NC028321 1             | 0,18578368 |
| Procyon lotor AB462046 3             | Diplogale hosei MH464790 1              | 0,18578383 |
| Procyon lotor AB462049 4             | Paradoxurus jerdoni MH464793 1          | 0,18578456 |
| Prionodon pardicolor NC024569 2      | Martes pennanti NC020664 16             | 0,185785   |

|                                       |                                       |            |
|---------------------------------------|---------------------------------------|------------|
| Proteles cristata T393 6              | Helogale parvula SRR7637809 1         | 0,15110666 |
| Prionailurus rubiginosus NC028304 2   | Galidia elegans D146 1                | 0,15110745 |
| Viverricula indica XX891751 1         | Panthera tigris NC010642 35           | 0,15110974 |
| Suricata suricatta SSM10 1            | Civettictis civetta NC033378 1        | 0,15113102 |
| Phoca groenlandica NC008429 54        | Arctocepalus townsendi NC008420 1     | 0,15116215 |
| Viverricula indica XK891751 1         | Urva semitorquata MH464789 1          | 0,15116516 |
| Viverricula indica XK891745 1         | Urva brachyura KY117547 1             | 0,15116534 |
| Viverricula indica NC025296 2         | Suricata suricatta SSM10 1            | 0,15116973 |
| Eupleres goudotii D128 1              | Crocota crocata NC020670 3            | 0,15117538 |
| Prionodon pardicolor NC024569 2       | Paradoxurus hermaphroditus NLNC 1     | 0,15117742 |
| Parahaena brunnea NC038159 15         | Leopardus pardalis T262 1             | 0,15118858 |
| Urva javanica/auropunctata NC006835 1 | Civettictis civetta GLC19 1           | 0,15120243 |
| Paradoxurus hermaphroditus NC039591 1 | Cynictis penicillata T375 1           | 0,15123203 |
| Mungos mungo MM7C 1                   | Lynx rufus NC014456 3                 | 0,15123516 |
| Leptailurus serval NC028316 1         | Urva brachyura KY117547 1             | 0,1512356  |
| Leopardus pardalis T262 1             | Cynictis penicillata T375 1           | 0,15123627 |
| Cynictis penicillata T375 1           | Catopuma badia NC028300 1             | 0,15123665 |
| Paradoxurus hermaphroditus NC039591 1 | Felis catus NC001700 2                | 0,15123679 |
| Panthera pardus japonensis KJ866876 8 | Fossa fossana D350 1                  | 0,15123709 |
| Leopardus geoffroyi NC028320 1        | Attilax paludinosus T606 1            | 0,15123908 |
| Proteles cristata T393 6              | Mungotictis decemlineata NC027828 1   | 0,15123956 |
| Leopardus guignae NC028321 1          | Eupleres goudotii D128 1              | 0,15123993 |
| Salanoia concolor D378 1              | Proteles cristata T393 6              | 0,15124001 |
| Galidictis fasciata DM333 1           | Felis margarita NC028308 1            | 0,15124249 |
| Paguma larvata PDD511 2               | Ichneumia albicauda T603 1            | 0,15124613 |
| Profelis aurata NC028299 1            | Cryptoprocta ferox CF13 1             | 0,15124615 |
| Prionodon pardicolor NC024569 2       | Pardofelis marmorata NLN3 2           | 0,15124868 |
| Mungos mungo MM7C 1                   | Acinonyx jubatus NC005212 3           | 0,15125005 |
| Prionailurus viverrinus NC028305 1    | Parahaena brunnea NC038159 15         | 0,15125585 |
| Panthera leo NERO 19                  | Fossa fossana D350 1                  | 0,15127249 |
| Ichneumia albicauda T603 1            | Civettictis civetta NC033378 1        | 0,15127647 |
| Viverricula indica XK891751 1         | Attilax paludinosus T606 1            | 0,15129577 |
| Viverra zibetha T609 1                | Mungos mungo/gambianus SRR7704821 1   | 0,15130037 |
| Mungos mungo MM7C 1                   | Felis margarita NC028308 1            | 0,1513027  |
| Phocarcos hookeri NC008418 1          | Monachus schauinslandi NC008421 1     | 0,15130304 |
| Felis catus NC001700 2                | Crossarchus platycephalus C7R66 1     | 0,15130311 |
| Felis catus NC001700 2                | Attilax paludinosus T606 1            | 0,15130401 |
| Paradoxurus jerdoni MH464793 1        | Lynx rufus NC014456 3                 | 0,15130411 |
| Paradoxurus hermaphroditus NLNC 1     | Felis catus NC001700 2                | 0,15130448 |
| Profelis aurata NC028299 1            | Paradoxurus jerdoni MH464793 1        | 0,15130518 |
| Leopardus geoffroyi NC028320 1        | Crossarchus platycephalus C7R66 1     | 0,15130542 |
| Prionailurus rubiginosus NC028304 2   | Ichneumia albicauda T603 1            | 0,15130574 |
| Ichneumia albicauda T603 1            | Catopuma badia NC028300 1             | 0,151306   |
| Puma concolor NC016470 22             | Mungotictis decemlineata NC027828 1   | 0,15130955 |
| Parahaena brunnea NC038159 15         | Lynx pardinus NC028319 161            | 0,15131889 |
| Leopardus colocolo NC028314 1         | Urva javanica T413 1                  | 0,15132035 |
| Prionodon linsang ERR2391707 1        | Civettictis civetta NC033378 1        | 0,15133108 |
| Parahaena brunnea NC038159 15         | Urva javanica/auropunctata NC006835 1 | 0,15134141 |
| Diplogale hosei MH464790 1            | Caracal caracal NC028306 1            | 0,15136829 |
| Urva javanica/auropunctata NC006835 1 | Civettictis civetta NC033378 1        | 0,15136963 |
| Urva semitorquata MH464789 1          | Felis catus NC001700 2                | 0,15137063 |
| Lynx rufus NC014456 3                 | Ichneumia albicauda T603 1            | 0,15137154 |
| Panthera tigris NC010642 35           | Genetta abyssinica MG489822 1         | 0,15137173 |
| Viverricula indica XK891751 1         | Salanoia concolor D378 1              | 0,15137209 |
| Paradoxurus hermaphroditus NC039591 1 | Felis chaus NC028307 1                | 0,15137228 |
| Paradoxurus hermaphroditus NC039591 1 | Leopardus geoffroyi NC028320 1        | 0,15137393 |
| Profelis aurata NC028299 1            | Prionodon pardicolor NC024569 2       | 0,15138394 |
| Viverricula indica XK891751 1         | Ailuropoda melanoleuca NC009492 5     | 0,15138851 |
| Panthera pardus NC010641 5            | Panthera pardus NC010641 5            | 0,15140407 |
| Lynx lynx NC027083 4                  | Mungotictis decemlineata NC027828 1   | 0,15141013 |
| Leopardus pardalis NC028315 1         | Helogale parvula SRR7637809 1         | 0,15143685 |
| Felis margarita NC028308 1            | Cynictis penicillata T375 1           | 0,15143809 |
| Leopardus tigrinus NC028317 1         | Eupleres goudotii D128 1              | 0,15144001 |
| Leopardus jacobita NC028322 1         | Urva semitorquata MH464789 1          | 0,15144008 |
| Mungotictis decemlineata NC027828 1   | Eupleres goudotii D128 1              | 0,15144368 |
| Cynictis penicillata T375 1           | Felis margarita NC028308 1            | 0,15144391 |
| Mungos mungo/gambianus SRR7704821 1   | Arctictis binturong T605 2            | 0,15144825 |
| Suricata suricatta SSM10 1            | Homotherium latidens MF871702 3       | 0,15146597 |
| Paradoxurus jerdoni MH464793 1        | Genetta abyssinica MG489822 1         | 0,15147297 |
| Prionailurus planiceps NC028312 6     | Mungos mungo MM7C 1                   | 0,15149957 |
| Paradoxurus hermaphroditus NC039591 1 | Mungos mungo/gambianus SRR7704821 1   | 0,15150563 |
| Panthera uncia KP202269 1             | Lynx pardinus NC028319 161            | 0,15150569 |
| Puma concolor NC016470 22             | Genetta abyssinica MG489822 1         | 0,15150616 |
| Leopardus pardalis NC028315 1         | Paradoxurus hermaphroditus NC039591 1 | 0,15150642 |
| Viverricula indica XK891751 1         | Galerella sanguinea T378 1            | 0,15150774 |
| Lynx rufus NC014456 3                 | Galerella sanguinea T378 1            | 0,15150943 |
| Mungotictis decemlineata NC027828 1   | Galidia elegans D146 1                | 0,15150987 |
| Phoca vitulina NC001325 1             | Caracal caracal NC028306 1            | 0,15151222 |
| Leopardus jacobita NC028322 1         | Arctocepalus forsteri NC004023 28     | 0,15151265 |
| Otocolobus manul NC028323 1           | Galidia elegans D146 1                | 0,15151304 |
| Viverra zibetha T609 1                | Galidictis fasciata DM333 1           | 0,15151323 |
| Prionodon linsang ERR2391707 1        | Ichneumia albicauda T603 1            | 0,15151555 |
| Leopardus colocolo NC028314 1         | Homotherium latidens MF871702 3       | 0,15151794 |
| Leopardus colocolo NC028314 1         | Galerella sanguinea T378 1            | 0,15152404 |
| Leopardus colocolo NC028314 1         | Helogale parvula SRR7637809 1         | 0,15152453 |
| Urva javanica T413 1                  | Attilax paludinosus T606 1            | 0,1515248  |
| Panthera leo NERO 19                  | Civettictis civetta NC033378 1        | 0,15153535 |
| Pardofelis marmorata NLN3 2           | Mungotictis decemlineata NC027828 1   | 0,15154402 |
| Paradoxurus hermaphroditus NC039591 1 | Chrotogale owstoni T607 1             | 0,15156542 |
| Lynx lynx NC027083 4                  | Leopardus tigrinus NC028317 1         | 0,15157142 |
| Genetta servalina NC024568 2          | Urva semitorquata MH464789 1          | 0,15157163 |
| Prionailurus bengalensis NC028301 12  | Cryptoprocta ferox CF13 1             | 0,15157229 |
| Leptailurus serval NC028316 1         | Urva javanica T413 1                  | 0,15157261 |
| Leopardus wiedii NC028318 1           | Urva javanica T413 1                  | 0,15157281 |
| Galidia elegans D146 1                | Urva javanica T413 1                  | 0,15157303 |
| Leptailurus serval NC028316 1         | Civettictis civetta GLC19 1           | 0,15157305 |
| Paradoxurus hermaphroditus NC039591 1 | Cynictis penicillata T375 1           | 0,15157305 |
| Mungotictis decemlineata NC027828 1   | Felis nigripes NC028309 1             | 0,1515737  |
| Prionodon linsang ERR2391707 1        | Crocota crocata NC020670 3            | 0,15157887 |
| Viverricula indica XK891751 1         | Arctictis binturong T605 2            | 0,15158062 |
| Parahaena brunnea NC038159 15         | Panthera tigris amoyensis NC014770 2  | 0,15158141 |
| Ommatophoca rossii AY377287etc 1      | Leopardus wiedii NC028318 1           | 0,15159249 |
|                                       | Arctocepalus gazella BK010918 1       | 0,1516294  |

|                                      |                                      |            |
|--------------------------------------|--------------------------------------|------------|
| Prionailurus planiceps NC028312 6    | Arctocepalus pusillus NC008417 1     | 0,18578508 |
| Galictis vittata T412 1              | Conepatus chinga NC042596 1          | 0,18578571 |
| Martes martes T302 3                 | Lycaon pictus NC028427 2             | 0,18578631 |
| Leopardus pardalis T262 1            | Arctotherium sp NC030174 1           | 0,18578698 |
| Felis silvestris lybica KP202275 4   | Arctotherium sp NC030174 1           | 0,18578714 |
| Paradoxurus hermaphroditus NC039591  | Mustela nivalis T306 5               | 0,18578722 |
| Prionailurus bengalensis NC028301 12 | Arctotherium sp NC030174 1           | 0,18578762 |
| Caracal caracal NC028306 1           | Arctotherium sp NC030174 1           | 0,18578772 |
| Puma concolor NC016470 22            | Otocyon megalotis SAF 2              | 0,18578847 |
| Ursus arctos AP012576 6              | Fossa fossana D350 1                 | 0,18578885 |
| Ursus thibetanus mupinensis NC00875  | Ichneumia albicauda T603 1           | 0,18578905 |
| Monachus monachus NC044972 5         | Tapirus terrestris T358              | 0,18578917 |
| Melursus ursinus NC009970 2          | Fossa fossana D350 1                 | 0,18578982 |
| Ursus spelaeus NC011112 8            | Lutrogale perspicillata NC035811 1   | 0,18579096 |
| Cuon alpinus NC013445 3              | Civettictis civetta NC033378 1       | 0,18579304 |
| Ursus thibetanus laniger MH281753 2  | Chrotogale owstoni T607 1            | 0,18579373 |
| Galictis vittata T412 1              | Arctocepalus pusillus NC008417 1     | 0,1857941  |
| Panthera uncia KP202269 1            | Ictonyx striatus T299 1              | 0,1857942  |
| Speothos venaticus C48 2             | Neovison vison NC020641 3            | 0,18579435 |
| Ursus maritimus NC003428 31          | Catopuma temminckii NC027115 41      | 0,18579492 |
| Ursus thibetanus laniger MH281753 2  | Procyon lotor AB462049 4             | 0,18579559 |
| Mungos mungo MM7C 1                  | Canis mesomelas KT448280 1           | 0,18579598 |
| Ictonyx striatus T299 1              | Arctotherium sp NC030174 1           | 0,18579592 |
| Canis lupus chanco NC010340 4        | Bdeogale nigripes GLC15 1            | 0,18579608 |
| Helarctos malayanus NC009968 2       | Canis latrans NC008093 7             | 0,18579629 |
| Mustela eversmannii NC028013 1       | Ailuropoda melanoleuca NC009492 5    | 0,18579692 |
| Ursus thibetanus thibetanus NC011112 | Procyon lotor AB462046 3             | 0,18579701 |
| Panthera onca NC022842 1             | Neovison vison NC020641 3            | 0,18579721 |
| Diplogale hosei MH464790 1           | Canis lupus familiaris NC002008 1231 | 0,18579844 |
| Panthera onca NC022842 1             | Mustela nivalis T306 5               | 0,1857986  |
| Ursus thibetanus laniger MH281753 2  | Ichneumia albicauda T603 1           | 0,18579951 |
| Diplogale hosei MH464790 1           | Canis aureus KT448274 1              | 0,18580264 |
| Mustela nigripes NC024942 1          | Urva javanica/auropunctata NC006835  | 0,18580411 |
| Profelis aurata NC028299 1           | Helarctos malayanus NC009968 2       | 0,18580686 |
| Prionailurus bengalensis CKM45 20    | Melursus ursinus NC009970 2          | 0,18580994 |
| Viverricula indica XK891745 1        | Gulo gulo NC009685 3                 | 0,1858117  |
| Homotherium latidens MF871702 3      | Arctocepalus gazella BK010918 1      | 0,18581207 |
| Leopardus jacobita NC028322 1        | Canis lupus familiaris NC002008 1231 | 0,18581349 |
| Ursus arctos pruinosus MG066703 3    | Genetta abyssinica MG489822 1        | 0,18581358 |
| Homotherium latidens MF871702 3      | Bassaricyon neblina SRX1097850 1     | 0,18581468 |
| Cynictis penicillata T375 1          | Canis mesomelas KT448280 1           | 0,18581524 |
| Prionailurus viverrinus NC028305 1   | Canis lupus chanco NC010340 4        | 0,18582378 |
| Lutra lutra NC011358 9               | Urva javanica T413 1                 | 0,18582478 |
| Eumetopias jubatus NC004030 10       | Cryptoprocta ferox CF13 1            | 0,18582582 |
| Urva javanica T413 1                 | Callorhinus ursinus NC008415 1       | 0,18582961 |
| Mustela sibirica NC020637 6          | Canis mesomelas KT448280 1           | 0,18582991 |
| Pusa hispida NC 008433 1             | Tapirus terrestris T358              | 0,18583241 |
| Phocarcos hookeri NC008418 1         | Mustela eversmannii NC028013 1       | 0,18583269 |
| Mustela sibirica NC020637 6          | Xenogale naso C07XAN110 1            | 0,18583328 |
| Bassaricyon neblina SRX1097850 1     | Arctocepalus australis MG023139 1    | 0,18583542 |
| Mustela sibirica AP017394 11         | Galidictis fasciata DM333 1          | 0,18583669 |
| Vulpes corsac NC023958 1             | Mustela sibirica AP017394 11         | 0,18583713 |
| Salanoia concolor D378 1             | Mustela nigripes NC024942 1          | 0,18583716 |
| Vulpes ferrilata NC027935 1          | Mungotictis decemlineata NC027828 1  | 0,18583777 |
| Otaria byronia OTAB 1                | Bassaricyon neblina SRX1097850 1     | 0,18583778 |
| Leopardus colocolo NC028314 1        | Canis mesomelas KT448280 1           | 0,18583797 |
| Mungotictis decemlineata NC027828 1  | Canis latrans NC008093 7             | 0,18583862 |
| Melogale moschata NC020644 1         | Attilax paludinosus T606 1           | 0,18583877 |
| Chrotogale owstoni T607 1            | Arctotherium sp NC030174 1           | 0,1858391  |
| Martes americana NC020642 1          | Galerella sanguinea T378 1           | 0,18584086 |
| Melursus ursinus NC009970 2          | Gulo gulo NC009685 3                 | 0,18584116 |
| Prionodon linsang ERR2391707 1       | Poecilogale albinucha T602 1         | 0,18584128 |
| Viverra zibetha T609 1               | Lontra canadensis SRR10409165 1      | 0,18584175 |
| Prionailurus planiceps NC028312 6    | Ailuurus fulgens styani NC009691 1   | 0,18584269 |
| Viverricula indica NC025296 2        | Melogale moschata V0735A 1           | 0,18584429 |
| Vulpes zerdia KJ603240 1             | Viverricula indica XK891751 1        | 0,18584545 |
| Vulpes lagopus NC026529 3            | Prionodon pardicolor NC024569 2      | 0,18584573 |
| Panthera onca KP202269 1             | Melogale moschata KP726273 1         | 0,18584579 |
| Cryptoprocta ferox CF13 1            | Arctocepalus pusillus NC008417 1     | 0,18584746 |
| Nyctereutes procyonoides NC013700 3  | Genetta servalina NC024568 2         | 0,18584746 |
| Caracal caracal NC028306 1           | Arctocepalus gazella BK010918 1      | 0,18584754 |
| Mephitis mephitis NC020648 1         | Callorhinus ursinus NC008415 1       | 0,18584783 |
| Panthera uncia KP202269 1            | Canis latrans NC008093 7             | 0,18584785 |
| Ursus thibetanus formosanus NC00933  | Conepatus chinga NC042596 1          | 0,18584795 |
| Ursus thibetanus mupinensis NC00875  | Phocarcos hookeri NC008418 1         | 0,18584816 |
| Lontra canadensis SRR10409165 1      | Felis silvestris lybica KP202275 4   | 0,18584883 |
| Vulpes zerdia KJ603240 1             | Catopuma badia NC028300 1            | 0,18584901 |
| Prionailurus planiceps NC028312 6    | Phocarcos hookeri NC008418 1         | 0,18584976 |
| Vulpes zerdia KJ603240 1             | Leopardus geoffroyi NC028320 1       | 0,1858504  |
| Melogale moschata KP726273 1         | Chrysocyon brachyurus NC024172 1     | 0,18585059 |
| Ichneumia albicauda T603 1           | Arctocepalus pusillus NC008417 1     | 0,18585065 |
| Poecilogale albinucha T602 1         | Felis catus NC001700 2               | 0,18585283 |
| Martes pennanti NC020664 16          | Felis catus NC001700 2               | 0,18585405 |
| Martes pennanti NC020664 16          | Felis margarita NC028308 1           | 0,18585436 |
| Viverra zibetha T609 1               | Otaria byronia OTAB 1                | 0,18585621 |
| Ursus spelaeus NC011112 8            | Lutra lutra NC011358 9               | 0,18585666 |
| Procyon lotor AB462049 4             | Leopardus guigna NC028321 1          | 0,18585668 |
| Panthera onca NC022842 1             | Melogale moschata V0735A 1           | 0,18585695 |
| Martes pennanti NC020664 16          | Lycaon pictus NC028427 2             | 0,18585753 |
| Ursus thibetanus formosanus NC00933  | Phocarcos hookeri NC008418 1         | 0,18585876 |
| Mustela nivalis T306 5               | Lycaon pictus NC028427 2             | 0,18585928 |
| Salanoia concolor D378 1             | Canis aureus KT448274 1              | 0,18585943 |
| Ursus arctos AP012576 6              | Martes melampus NC009678 1           | 0,18585952 |
| Ursus arctos isabellinus 1885 2      | Prionailurus bengalensis NC028301 12 | 0,18585968 |
| Canis aureus KT448274 1              | Ailuurus fulgens styani NC009691 1   | 0,18586142 |
| Ursus thibetanus mupinensis NC00875  | Otocolobus manul NC028323 1          | 0,18586256 |
| Ursus arctos isabellinus 1885 2      | Prionailurus bengalensis CKM45 20    | 0,18586257 |
| Viverra tangalunga MH464792 1        | Melursus ursinus NC009970 2          | 0,18586352 |
| Arctotherium sp NC030174 1           | Arctictis binturong T605 2           | 0,18586512 |
| Canis aureus EU327344 13             | Felis catus NC001700 2               | 0,18586682 |
| Ursus thibetanus thibetanus NC011112 | Ichneumia albicauda T603 1           | 0,18586885 |
| Ursus arctos GU573491 207            | Arctocepalus forsteri NC004023 28    | 0,18586894 |
| Ursus arctos AP012576 6              | Aonyx cinerea NC035814 2             | 0,18586949 |

|                                         |                                       |            |
|-----------------------------------------|---------------------------------------|------------|
| Paradoxurus hermaphroditus NC039591 1   | Leopardus jacobita NC028322 1         | 0,15163875 |
| Viverricula indica XK891751 1           | Panthera leo spelaea KX258452 2       | 0,15164042 |
| Otocolobus manul NC028323 1             | Eupleres goudotii D128 1              | 0,15164278 |
| Mungotictis decemlineata NC027828 1     | Leptailurus serval NC028316 1         | 0,15164724 |
| Felis nigripes NC028309 1               | Cryptoprocta ferox CFC13 1            | 0,15164973 |
| Crossarchus platycephalus C7R66 1       | Acinonyx jubatus NC005212 3           | 0,15165603 |
| Cryptoprocta ferox CFC13 1              | Acinonyx jubatus NC005212 3           | 0,15166578 |
| Prionodon linsang ERR2391707 1          | Nandinia binotata NC024567 1          | 0,15169674 |
| Prionodon linsang ERR2391707 1          | Felis nigripes NC028309 1             | 0,15170331 |
| Paguma larvata PDD511 2                 | Mungos mungo/gambianus SRR7704821 1   | 0,15170377 |
| Pardofelis marmorata NLN3 2             | Attilax paludinosus T606 1            | 0,15170807 |
| Puma yagouaroundi NC028311 1            | Urva semitorquata MH464789 1          | 0,15170844 |
| Mungos mungo/gambianus SRR7704821 1     | Leopardus jacobita NC028322 1         | 0,15170968 |
| Mungos mungo MMC7 1                     | Hyaena hyaena NC020669 1              | 0,15171145 |
| Galidictis fasciata DM333 1             | Felis catus NC001700 2                | 0,15171333 |
| Prionailurus rubiginosus NC028304 2     | Prionailurus rubiginosus NC020669 1   | 0,15171953 |
| Ommatophoca rossii AY377287etc 1        | Arctocepalus pusillus NC008417 1      | 0,15171996 |
| Lynx pardinus NC028319 161              | Arctocepalus NC020669 1               | 0,15172009 |
| Parahyaena brunnea NC038159 15          | Lynx rufus NC014456 3                 | 0,15172298 |
| Prionodon pardicolor NC024569 2         | Genetta abyssinica MG489822 1         | 0,15174761 |
| Panthera leo NERO 19                    | Arctictis binturong T605 2            | 0,15175645 |
| Lynx canadensis NC028313 1              | Chrotogale owstoni T607 1             | 0,151767   |
| Prionodon linsang ERR2391707 1          | Prionailurus viverrinus NC028305 1    | 0,15176988 |
| Paguma larvata PDD511 2                 | Cynictis penicillata T375 1           | 0,15177086 |
| Mungos mungo/gambianus SRR7704821 1     | Lynx pardinus NC028319 161            | 0,15177388 |
| Mungos mungo MMC7 1                     | Lynx pardinus NC028319 161            | 0,15177399 |
| Prionailurus bengalensis NC028301 12    | Urva brachyura KY117547 1             | 0,15177399 |
| Helogale parvula SRR7637809 1           | Catopuma badia NC028300 1             | 0,15177453 |
| Urva semitorquata MH464789 1            | Felis nigripes NC028309 1             | 0,15177482 |
| Leopardus wiedii NC028318 1             | Xenogale naso C07XAR110 1             | 0,15177558 |
| Otocolobus manul NC028323 1             | Attilax paludinosus T606 1            | 0,15177695 |
| Leopardus geoffroyi NC028320 1          | Urva javanica T413 1                  | 0,15177727 |
| Pardofelis marmorata NLN3 2             | Mungotictis decemlineata NC027828 1   | 0,15178029 |
| Leopardus tigrinus NC028317 1           | Eupleres goudotii D128 1              | 0,15178053 |
| Salanoia concolor D378 1                | Crocota crocata NC020670 3            | 0,1517809  |
| Puma concolor NC016470 22               | Galidictis fasciata DM333 1           | 0,15178142 |
| Panthera tigris NC010642 35             | Genetta genetta T297 1                | 0,15178537 |
| Diplogale hosei MH464790 1              | Catopuma temminckii NC027115 41       | 0,15179057 |
| Leopardus colocolo NC028314 1           | Galidia elegans D146 1                | 0,15179519 |
| Prionailurus rubiginosus NC028304 2     | Urva javanica/auripunctata NC006835 1 | 0,15180619 |
| Parahyaena brunnea NC038159 15          | Leopardus colocolo NC028314 1         | 0,15181008 |
| Urva brachyura KY117547 1               | Civettictis civetta GLC19 1           | 0,15183951 |
| Prionailurus rubiginosus NC028304 2     | Urva brachyura KY117547 1             | 0,15184118 |
| Mungos mungo/gambianus SRR7704821 1     | Catopuma badia NC028300 1             | 0,15184185 |
| Paradoxurus hermaphroditus NLNC 1       | Lynx lynx NC027083 4                  | 0,15184227 |
| Prionodon linsang ERR2391707 1          | Leopardus guigna NC028321 1           | 0,15184289 |
| Viverricula indica XK891751 1           | Galidictis fasciata DM333 1           | 0,15184379 |
| Leopardus geoffroyi NC028320 1          | Cynictis penicillata T375 1           | 0,15184462 |
| Leopardus geoffroyi NC028320 1          | Ichneumia albicauda T603 1            | 0,15184684 |
| Panthera pardus japonensis KJ866876 8   | Galidictis fasciata DM333 1           | 0,15184711 |
| Prionailurus rubiginosus NC028304 2     | Cryptoprocta ferox CFC13 1            | 0,15185253 |
| Panthera onca NC022842 1                | Genetta genetta T297 1                | 0,15185457 |
| Salanoia concolor D378 1                | Homotherium latidens MF871702 3       | 0,15185921 |
| Puma yagouaroundi NC028311 1            | Parahyaena brunnea NC038159 15        | 0,15185964 |
| Prionailurus bengalensis NC028301 12    | Cynogale bennetti KY117544 1          | 0,15188162 |
| Viverricula indica XK891751 1           | Xenogale naso C07XAR110 1             | 0,1519056  |
| Viverricula indica XK891745 1           | Helogale parvula SRR7637809 1         | 0,15190615 |
| Panthera leo spelaea KX258452 2         | Mungotictis decemlineata NC027828 1   | 0,15190777 |
| Lynx lynx NC027083 4                    | Bdeogale nigripes GLC15 1             | 0,15190823 |
| Leopardus pardalis T262 1               | Urva brachyura KY117547 1             | 0,15190902 |
| Pardofelis marmorata NLN3 2             | Urva semitorquata MH464789 1          | 0,15190935 |
| Prionailurus planiceps KY682741 4       | Mungos mungo/gambianus SRR7704821 1   | 0,1519096  |
| Leopardus wiedii NC028318 1             | Cynictis penicillata T375 1           | 0,15190968 |
| Prionailurus bengalensis NC028301 12    | Galerella sanguinea T378 1            | 0,15191105 |
| Prionailurus planiceps KY682741 4       | Cryptoprocta ferox CFC13 1            | 0,15191957 |
| Puma yagouaroundi NC028311 1            | Cryptoprocta ferox CFC13 1            | 0,15191993 |
| Leopardus colocolo NC028314 1           | Cynictis penicillata T375 1           | 0,15192629 |
| Smilodon populator MF871700 1           | Cynictis isabellinus T375 1           | 0,15193202 |
| Paguma larvata PDD511 2                 | Crossarchus platycephalus C7R66 1     | 0,15193233 |
| Viverra zibetha T609 1                  | Bdeogale nigripes GLC15 1             | 0,15193433 |
| Crossarchus platycephalus C7R66 1       | Catopuma temminckii NC027115 41       | 0,15194722 |
| Prionailurus viverrinus NC028305 1      | Paradoxurus hermaphroditus NC039591 1 | 0,15197612 |
| Lynx lynx NC027083 4                    | Attilax paludinosus T606 1            | 0,1519763  |
| Leopardus pardalis T262 1               | Xenogale naso C07XAR110 1             | 0,15197721 |
| Prionailurus viverrinus NC028305 1      | Urva javanica T413 1                  | 0,15197773 |
| Pardofelis marmorata NLN3 2             | Paradoxurus hermaphroditus NLNC 1     | 0,15197799 |
| Panthera tigris amoyensis NC014770 2    | Genetta abyssinica MG489822 1         | 0,15197828 |
| Hyaena hyaena NC020669 1                | Galerella sanguinea T378 1            | 0,15197866 |
| Hyaena hyaena NC020669 1                | Galidia elegans D146 1                | 0,15198047 |
| Lynx lynx NC027083 4                    | Galidia elegans D146 1                | 0,15198053 |
| Prionailurus bengalensis CKM45 20       | Bdeogale nigripes GLC15 1             | 0,15198117 |
| Prionailurus rubiginosus NC028304 2     | Parahyaena brunnea NC038159 15        | 0,15199402 |
| Lynx pardinus NC028319 161              | Diplogale hosei MH464790 1            | 0,15203145 |
| Ommatophoca rossii AY377287etc 1        | Arctocepalus forsteri NC004023 28     | 0,15203856 |
| Mungos mungo/gambianus SRR7704821 1     | Genetta genetta T297 1                | 0,15204257 |
| Mungos mungo MMC7 1                     | Catopuma temminckii NC027115 41       | 0,15204273 |
| Cynictis penicillata T375 1             | Caracal caracal NC028306 1            | 0,1520444  |
| Galerella sanguinea T378 1              | Catopuma badia NC028300 1             | 0,15204492 |
| Prionailurus viverrinus NC028305 1      | Mungos mungo MMC7 1                   | 0,15204617 |
| Galidia elegans D146 1                  | Felis silvestris lybica KP202275 4    | 0,15204917 |
| Paguma larvata PDD511 2                 | Galerella sanguinea T378 1            | 0,15205242 |
| Ursus thibetanus mupiniensis NC008753 2 | Ailuropoda melanoleuca NC009492 5     | 0,15205458 |
| Helarctos malayanus NC009968 2          | Ailuropoda melanoleuca NC009492 5     | 0,15206185 |
| Urva javanica/auripunctata NC006835 1   | Arctictis binturong T605 2            | 0,15208726 |
| Urocyon cinereoargenteus NC026723 21    | Lycan pictus NC028427 2               | 0,15209682 |
| Paradoxurus jerdoni MH464793 1          | Fossa fossana D350 1                  | 0,15210666 |
| Genetta genetta T297 1                  | Attilax paludinosus T606 1            | 0,1521094  |
| Lynx canadensis NC028313 1              | Urva semitorquata MH464789 1          | 0,15211049 |
| Prionailurus planiceps NC028312 6       | Mungos mungo MMC7 1                   | 0,1521112  |
| Leopardus pardalis NC028315 1           | Urva javanica T413 1                  | 0,15211143 |
| Urva javanica T413 1                    | Catopuma badia NC028300 1             | 0,15211211 |
| Suricata suricatta SSM10 1              | Leopardus pardalis T262 1             | 0,15211223 |
| Leptailurus serval NC028316 1           | Eupleres goudotii D128 1              | 0,152114   |

|                                      |                                      |            |
|--------------------------------------|--------------------------------------|------------|
| Ursus thibetanus formosanus NC00933  | Felis nigripes NC028309 1            | 0,1858696  |
| Ursus thibetanus thibetanus NC011118 | Panthera pardus japonensis KJ866876  | 0,18587025 |
| Neophoca cinerea NC008419 1          | Leopardus colocolo NC028314 1        | 0,1858703  |
| Puma concolor NC016470 22            | Galictis vittata T412 1              | 0,18587089 |
| Leptailurus serval NC028316 1        | Galictis vittata T412 1              | 0,18587144 |
| Prionailurus planiceps KY682741 4    | Melursus ursinus NC009970 2          | 0,18587323 |
| Zalophus californianus NC008416 1    | Cryptoprocta ferox CFC13 1           | 0,18587331 |
| Ursus thibetanus thibetanus NC011118 | Otocolobus manul NC028323 1          | 0,18587372 |
| Prionailurus viverrinus NC028305 1   | Melursus ursinus NC009970 2          | 0,18587397 |
| Urva brachyura KY117547 1            | Eumetopias jubatus NC004030 10       | 0,18587881 |
| Ursus americanus JX196366 3          | Phocarcos hookeri NC008418 1         | 0,18588173 |
| Lycalopex securus KT448284 1         | Leopardus geoffroyi NC028320 1       | 0,18588406 |
| Zalophus californianus NC008416 1    | Panthera tigris NC010642 35          | 0,18588465 |
| Viverra tangalunga MH464792 1        | Lycalopex securus KT448284 1         | 0,18588947 |
| Mustela eversmannii NC028013 1       | Lycalopex securus KT448284 1         | 0,18588983 |
| Melursus ursinus NC009970 2          | Leopardus colocolo NC028314 1        | 0,18589164 |
| Ursus arctos GU573491 207            | Civettictis civetta NC033378 1       | 0,18589313 |
| Paradoxurus hermaphroditus NLNC 1    | Eumetopias jubatus NC004030 10       | 0,18589321 |
| Prionailurus rubiginosus NC028304 2  | Cuon alpinus NC013445 3              | 0,18589745 |
| Meles leucurus NC039173 4            | Urva brachyura KY117547 1            | 0,18589783 |
| Vulpes corsac NC023958 1             | Genetta abyssinica MG489822 1        | 0,18589872 |
| Mustela putorius NC020638 4          | Urva javanica T413 1                 | 0,18590066 |
| Neophoca cinerea NC008419 1          | Mungos mungo/gambianus SRR77048      | 0,18590188 |
| Leopardus geoffroyi NC028320 1       | Cuon alpinus NC013445 3              | 0,18590248 |
| Meles anakuma NC009677 1             | Galidictis fasciata DM333 1          | 0,18590304 |
| Salanoia concolor D378 1             | Nyctereutes procyonoides NC013700 3  | 0,18590473 |
| Mungos mungo MMC7 1                  | Melogale moschata NC020644 1         | 0,18590477 |
| Attilax paludinosus T606 1           | Arctocepalus pusillus NC008417 1     | 0,18590498 |
| Nyctereutes procyonoides NC013700 3  | Mustela nigripes NC024942 1          | 0,18590556 |
| Vulpes ferrilata NC027935 1          | Smilodon populator MF871700 1        | 0,18590613 |
| Mustela erminea T305 2               | Cynogale bennetti KY117544 1         | 0,18590625 |
| Lutrogale perspicillata NC035811 1   | Arctocepalus australis MG023139 1    | 0,18590626 |
| Vulpes ferrilata NC027935 1          | Mustela erminea T305 2               | 0,18590714 |
| Chrotogale owstoni T607 1            | Canis anthus NC027956 2              | 0,18590776 |
| Leopardus pardalis T262 1            | Ailuurus fulgens NC011124 1          | 0,18590803 |
| Mustela sibirica NC020637 6          | Galerella sanguinea T378 1           | 0,18590807 |
| Felis margarita NC028308 1           | Conepatus chinga NC024596 1          | 0,18590961 |
| Gulo gulo NC009685 3                 | Ailuropoda melanoleuca NC009492 5    | 0,18591012 |
| Mustela nivalis T306 5               | Xenogale naso C07XAR110 1            | 0,18591034 |
| Suricata suricatta SSM10 1           | Neovison vison NC020641 3            | 0,18591061 |
| Viverricula indica NC025296 2        | Arctocepalus australis MG023139 1    | 0,1859107  |
| Vulpes zerdia KJ603240 1             | Martes martes T302 3                 | 0,18591075 |
| Vulpes vulpes NC008434 5             | Martes martes T302 3                 | 0,18591115 |
| Mustela sibirica NC020637 6          | Hyaena hyaena NC020669 1             | 0,18591163 |
| Helogale parvula SRR7637809 1        | Arctodus simus NC011116 1            | 0,18591215 |
| Leptailurus serval NC028316 1        | Conepatus chinga NC024596 1          | 0,18591224 |
| Panthera onca KP202264 2             | Mustela sibirica AP017394 11         | 0,18591265 |
| Paradoxurus hermaphroditus NC03959   | Mustela altaica NC021751 1           | 0,18591291 |
| Suricata suricatta SSM10 1           | Martes foina NC020643 1              | 0,1859131  |
| Pardofelis marmorata NLN3 2          | Melogale moschata KP726273 1         | 0,18591318 |
| Panthera onca KP202269 1             | Lutra sumatrana NC035810 1           | 0,18591335 |
| Tremarctos ornatus NC009969 2        | Leopardus pardalis T262 1            | 0,1859152  |
| Martes martes T302 3                 | Hemigalus striatus MH464791 1        | 0,18591546 |
| Neophoca cinerea NC008419 1          | Ictonyx striatus T299 1              | 0,18591674 |
| Smilodon populator MF871700 1        | Mephitis mephitis NC020648 1         | 0,18591782 |
| Conepatus chinga NC024596 1          | Ailuropoda melanoleuca NC009492 5    | 0,18591823 |
| Neophoca cinerea NC008419 1          | Caracal caracal NC028306 1           | 0,18591841 |
| Mungotictis decemlineata NC027828    | Ictonyx striatus T299 1              | 0,18591879 |
| Neophoca cinerea NC008419 1          | Leopardus guigna NC028321 1          | 0,18591915 |
| Procyon lotor AB462046 3             | Paradoxurus hermaphroditus NLNC 1    | 0,18591919 |
| Martes martes T302 3                 | Genetta genetta T297 1               | 0,18592031 |
| Viverricula indica XK891751 1        | Ursus arctos EU497665 29             | 0,18592052 |
| Profelis aurata NC028299 1           | Melogale moschata NC020644 1         | 0,18592145 |
| Leopardus wiedii NC028318 1          | Arctotherium sp NC030174 1           | 0,18592179 |
| Ursus arctos GU573491 207            | Mustela altaica NC021751 1           | 0,18592198 |
| Otocolobus manul NC028323 1          | Aonyx cinerea NC035814 2             | 0,18592267 |
| Chrysocyon brachyurus NC024172 1     | Arctonyx collaris NC020645 1         | 0,18592399 |
| Ursus arctos isabellinus 18B5 2      | Caracal caracal NC028306 1           | 0,18592684 |
| Leopardus colocolo NC028314 1        | Tapirus terrestris T358              | 0,18592791 |
| Ursus spelaeus NC011112 8            | Salanoia concolor D378 1             | 0,18592916 |
| Helarctos malayanus NC009968 2       | Aonyx cinerea NC035814 2             | 0,18592997 |
| Ursus maritimus GU573488 Svalbard    | Leopardus geoffroyi NC028320 1       | 0,18593024 |
| Arctocepalus pusillus NC008417 1     | Ailuropoda melanoleuca NC009492 5    | 0,1859304  |
| Fossa fossana D350 1                 | Canis lupus chanco NC010340 4        | 0,18593085 |
| Procyon lotor AB462049 4             | Helarctos malayanus NC009968 2       | 0,18593121 |
| Ursus arctos AP012576 6              | Meles anakuma NC009677 1             | 0,18593256 |
| Panthera pardus japonensis KJ866876  | Canis aureus KT448274 1              | 0,18593355 |
| Leopardus colocolo NC028314 1        | Arctocepalus australis MG023139 1    | 0,18593432 |
| Leopardus tigrinus NC028317 1        | Galictis vittata T412 1              | 0,18593682 |
| Ursus arctos AP012576 6              | Mustela altaica NC021751 1           | 0,18593735 |
| Zalophus wolfebaeki SRR4431565 1     | Parahyaena brunnea NC038159 15       | 0,18593737 |
| Ursus arctos AP012576 6              | Mustela nivalis T306 5               | 0,18593957 |
| Lynx pardinus NC028319 161           | Chrysocyon brachyurus NC024172 1     | 0,18593958 |
| Vulpes zerdia KJ603240 1             | Genetta abyssinica MG489822 1        | 0,18593995 |
| Leopardus colocolo NC028314 1        | Arctotherium sp NC030174 1           | 0,18594085 |
| Procyon lotor AB462046 3             | Canis lupus familiaris NC002008 1231 | 0,1859412  |
| Otocolobus manul NC028323 1          | Helarctos malayanus NC009968 2       | 0,18594158 |
| Leopardus guigna NC028321 1          | Helarctos malayanus NC009968 2       | 0,18594302 |
| Ursus spelaeus NC011112 8            | Catopuma badia NC028300 1            | 0,18594338 |
| Otaria byronia OTAB 1                | Leopardus colocolo NC028314 1        | 0,18594342 |
| Ursus arctos isabellinus 18B5 2      | Leopardus colocolo NC028314 1        | 0,18594393 |
| Martes foina NC020643 1              | Canis lupus chanco NC010340 4        | 0,18595053 |
| Ursus arctos AP012576 6              | Arctictis binturong T605 2           | 0,18595141 |
| Ursus americanus JX196366 3          | Civettictis civetta GLC19 1          | 0,18595409 |
| Genetta abyssinica MG489822 1        | Arctocepalus townsendi NC008420 1    | 0,18595427 |
| Urva javanica/auripunctata NC006835  | Chrysocyon brachyurus NC024172 1     | 0,18595588 |
| Leopardus pardalis T262 1            | Cuon alpinus NC013445 3              | 0,18595615 |
| Martes flavigula NC012141 3          | Catopuma temminckii NC027115 41      | 0,18595676 |
| Ursus spelaeus NC011112 8            | Ictonyx striatus T299 1              | 0,18595774 |
| Neophoca cinerea NC008419 1          | Civettictis civetta NC033378 1       | 0,18595994 |
| Panthera onca KP202264 2             | Eumetopias jubatus NC004030 10       | 0,18596242 |
| Panthera pardus NC010641 5           | Melogale moschata NC020644 1         | 0,18596368 |
| Lutra sumatrana NC035810 1           | Urva javanica T413 1                 | 0,18596415 |

|                                          |                                       |            |
|------------------------------------------|---------------------------------------|------------|
| Leopardus colocolo NC028314 1            | Bdeogale nigripes GLC15 1             | 0,15212917 |
| Leopardus colocolo NC028314 1            | Ichneumia albicauda T603 1            | 0,15213111 |
| Urocyon littoralis catalinae KP129018 15 | Lycan pictus NC028427 2               | 0,15216416 |
| Genetta servalina NC024568 2             | Eupleres goudotii D128 1              | 0,15217288 |
| Suricata suricatta SSM10 1               | Civettictis civetta GLC19 1           | 0,15217592 |
| Mungos mungo/gambianus SRR7704821 1      | Lynx rufus NC014456 3                 | 0,15217793 |
| Lynx rufus NC014456 3                    | Xenogale naso C07XAR110 1             | 0,15217805 |
| Helogale parvula SRR7637809 1            | Felis silvestris lybica KP202275 4    | 0,15217865 |
| Catopuma badia NC028300 1                | Bdeogale nigripes GLC15 1             | 0,15217972 |
| Parahyaena brunnea NC038159 15           | Urva javanica T413 1                  | 0,15218151 |
| Leptailurus serval NC028316 1            | Ichneumia albicauda T603 1            | 0,15218152 |
| Panthera uncia KP202269 1                | Genetta servalina NC024568 2          | 0,15218233 |
| Lynx pardinus NC028319 161               | Galidia elegans D146 1                | 0,15218337 |
| Paradoxurus hermaphroditus NC039591 1    | Leopardus guigna NC028321 1           | 0,15218742 |
| Mungos mungo MMC7 1                      | Arctictis binturong T605 2            | 0,15218882 |
| Urva semitorquata MH464789 1             | Acinonyx jubatus NC005212 3           | 0,1521941  |
| Panthera onca KP202264 2                 | Hemigalus derbyanus MH464791 1        | 0,15219487 |
| Panthera leo spelaea XK258452 2          | Hemigalus derbyanus MH464791 1        | 0,15220106 |
| Panthera onca NC028242 1                 | Hemigalus derbyanus MH464791 1        | 0,15222564 |
| Ichneumia albicauda T603 1               | Chrotogale owstoni T607 1             | 0,15224212 |
| Mungos mungo MMC7 1                      | Caracal caracal NC028306 1            | 0,15224595 |
| Smilodon populator MF871700 1            | Urva javanica/auropunctata NC006835 1 | 0,15224683 |
| Profelis aurata NC028299 1               | Mungos mungo/gambianus SRR7704821 1   | 0,15224701 |
| Galidictis fasciata DM333 1              | Felis nigripes NC028309 1             | 0,15225232 |
| Prionodon pardicolor NC024569 2          | Panthera onca KP202264 2              | 0,15225761 |
| Atilax paludinosus T606 1                | Acinonyx jubatus NC005212 3           | 0,15226211 |
| Ursus thibetanus laniger MH281753 2      | Ailuropoda melanoleuca NC009492 5     | 0,15226255 |
| Paradoxurus hermaphroditus NLNC 1        | Urva javanica/auropunctata NC006835 1 | 0,15227346 |
| Viverricula indica NC025296 2            | Neofelis nebulosa NC008450 3          | 0,15228209 |
| Paradoxurus hermaphroditus NC039591 1    | Mungos mungo MMC7 1                   | 0,15230736 |
| Prionodon linsang ERR2391707 1           | Leopardus tigrinus NC028317 1         | 0,15230738 |
| Prionodon linsang ERR2391707 1           | Leopardus jacobita NC028322 1         | 0,15230772 |
| Pardofelis marmorata NLN3 2              | Helogale parvula SRR7637809 1         | 0,15231337 |
| Hyena hyaena NC020669 1                  | Xenogale naso C07XAR110 1             | 0,15231465 |
| Puma yagouaroundi NC028311 1             | Ichneumia albicauda T603 1            | 0,15231605 |
| Viverricula indica XK891745 1            | Panthera uncia NC010638 1             | 0,15231615 |
| Leopardus guigna NC028321 1              | Galerella sanguinea T378 1            | 0,15231693 |
| Hyena hyaena NC020669 1                  | Cryptoprocta ferox FC13 1             | 0,15232769 |
| Leopardus tigrinus NC028317 1            | Hyaena hyaena NC020669 1              | 0,15232964 |
| Leopardus pardalis T262 1                | Urva javanica/auropunctata NC006835 1 | 0,15234642 |
| Panthera pardus japonensis KJ866876 8    | Hemigalus derbyanus MH464791 1        | 0,15235974 |
| Crossarchus platycephalus C7R66 1        | Chrotogale owstoni T607 1             | 0,15236008 |
| Cynogale bennetti KY117544 1             | Acinonyx jubatus NC005212 3           | 0,15236397 |
| Lynx lynx NC027083 4                     | Chrotogale owstoni T607 1             | 0,15237333 |
| Paguma larvata PDD511 2                  | Urva semitorquata MH464789 1          | 0,15237699 |
| Xenogale naso C07XAR110 1                | Genetta servalina NC024568 2          | 0,15237775 |
| Mungos mungo/gambianus SRR7704821 1      | Lynx lynx NC027083 4                  | 0,15237924 |
| Mungos mungo MMC7 1                      | Felis silvestris lybica KP202275 4    | 0,1523798  |
| Leopardus wiedii NC028318 1              | Urva brachyura KY117547 1             | 0,15238041 |
| Profelis aurata NC028299 1               | Urva semitorquata MH464789 1          | 0,15238194 |
| Otocolobus manul NC028323 1              | Crossarchus platycephalus C7R66 1     | 0,15238199 |
| Leopardus jacobita NC028322 1            | Ichneumia albicauda T603 1            | 0,15238413 |
| Smilodon populator MF871700 1            | Ichneumia albicauda T603 1            | 0,15238523 |
| Pardofelis marmorata NLN3 2              | Galidictis fasciata DM333 1           | 0,15238722 |
| Paradoxurus jerdoni MH464793 1           | Leopardus geoffroyi NC028320 1        | 0,15238941 |
| Pardofelis marmorata NLN3 2              | Cryptoprocta ferox FC13 1             | 0,15239109 |
| Smilodon populator MF871700 1            | Bdeogale nigripes GLC15 1             | 0,15239951 |
| Ichneumia albicauda T603 1               | Diplogale hosei MH464790 1            | 0,15241219 |
| Smilodon populator MF871700 1            | Cynogale bennetti KY117544 1          | 0,15241227 |
| Mungos mungo/gambianus SRR7704821 1      | Chrotogale owstoni T607 1             | 0,15242846 |
| Prionodon linsang ERR2391707 1           | Lynx rufus NC014456 3                 | 0,15244351 |
| Paradoxurus hermaphroditus NC039591 1    | Lynx rufus NC014456 3                 | 0,15244846 |
| Otocolobus manul NC028323 1              | Urva semitorquata MH464789 1          | 0,15244946 |
| Puma concolor NC016470 22                | Ichneumia albicauda T603 1            | 0,15245017 |
| Hemigalus derbyanus MH464791 1           | Helogale parvula SRR7637809 1         | 0,15245464 |
| Diplogale hosei MH464790 1               | Atilax paludinosus T606 1             | 0,15245672 |
| Zalophus californianus NC008416 1        | Odobenus rosmarus NC004029 29         | 0,1524671  |
| Mungos mungo MMC7 1                      | Diplogale hosei MH464790 1            | 0,15247315 |
| Viverricula indica XK891745 1            | Neofelis nebulosa NC008450 3          | 0,1524808  |
| Suricata suricatta SSM10 1               | Nandinia binotata NC024567 1          | 0,15250471 |
| Paradoxurus hermaphroditus NLNC 1        | Mungos mungo/gambianus SRR7704821 1   | 0,15251154 |
| Lynx pardinus NC028319 161               | Urva semitorquata MH464789 1          | 0,15251511 |
| Ichneumia albicauda T603 1               | Catopuma temminckii NC027115 41       | 0,15251742 |
| Galidia elegans D146 1                   | Catopuma badia NC028300 1             | 0,15251854 |
| Lynx canadensis NC028313 1               | Galidia elegans D146 1                | 0,15251969 |
| Parahyaena brunnea NC038159 15           | Leopardus pardalis NC028315 1         | 0,15253505 |
| Panthera pardus NC010641 5               | Galidictis fasciata DM333 1           | 0,15255629 |
| Viverra zibetha T609 1                   | Suricata suricatta SSM10 1            | 0,15257962 |
| Viverra zibetha T609 1                   | Urva brachyura KY117547 1             | 0,15257971 |
| Lynx rufus NC014456 3                    | Urva javanica T413 1                  | 0,15258101 |
| Viverra zibetha T609 1                   | Cryptoprocta ferox FC13 1             | 0,15258232 |
| Prionailurus planiceps KY682741 4        | Mungos mungo MMC7 1                   | 0,15258245 |
| Prionailurus viverrinus NC028305 1       | Paradoxurus jerdoni MH464793 1        | 0,15258282 |
| Paradoxurus hermaphroditus NLNC 1        | Lynx canadensis NC028313 1            | 0,15258303 |
| Felis nigripes NC028309 1                | Atilax paludinosus T606 1             | 0,15258361 |
| Hyena hyaena NC020669 1                  | Cynictis penicillata T375 1           | 0,15258408 |
| Mungos mungo MMC7 1                      | Leopardus tigrinus NC028317 1         | 0,15258513 |
| Ommatophoca rossii AY377287etc 1         | Arctocepalus forsteri KT693377 17     | 0,15258551 |
| Leopardus tigrinus NC028317 1            | Galerella sanguinea T378 1            | 0,15258558 |
| Prionailurus bengalensis CKM45 20        | Galerella sanguinea T378 1            | 0,15258764 |
| Ursus arctos isabellinus 18B5 2          | Ailuropoda melanoleuca NC009492 5     | 0,15258832 |
| Otocolobus manul NC028323 1              | Mungotictis decemlineata NC027828 1   | 0,15259022 |
| Hyena hyaena NC020669 1                  | Catopuma badia NC028300 1             | 0,15259333 |
| Parahyaena brunnea NC038159 15           | Leopardus guigna NC028321 1           | 0,15260126 |
| Homotherium latidens MF871702 3          | Galerella sanguinea T378 1            | 0,15260206 |
| Helogale parvula SRR7637809 1            | Genetta abyssinica MG489822 1         | 0,15263847 |
| Urva brachyura KY117547 1                | Genetta abyssinica MG489822 1         | 0,15263937 |
| Paguma larvata PDD511 2                  | Eupleres goudotii D128 1              | 0,15264252 |
| Paradoxurus jerdoni MH464793 1           | Cynictis penicillata T375 1           | 0,15264589 |
| Prionodon linsang ERR2391707 1           | Otocolobus manul NC028323 1           | 0,15264639 |
| Suricata suricatta SSM10 1               | Prionailurus bengalensis NC028301 12  | 0,15264985 |
| Puma yagouaroundi NC028311 1             | Cynictis penicillata T375 1           | 0,15265013 |
| Viverricula indica XK891745 1            | Galidia elegans D146 1                | 0,15265058 |

|                                     |                                      |            |
|-------------------------------------|--------------------------------------|------------|
| Mustela itatsi NC034330 19          | Eupleres goudotii D128 1             | 0,18596649 |
| Martes americana NC020642 1         | Bdeogale nigripes GLC15 1            | 0,18596651 |
| Fossa fossana D350 1                | Canis anthus NC027956 2              | 0,18596879 |
| Mungos mungo/gambianus SRR7704821 1 | Ailuurus fulgens styani NC009691 1   | 0,18596923 |
| Neophoca cinerea NC008419 1         | Urva semitorquata MH464789 1         | 0,18596943 |
| Neophoca cinerea NC008419 1         | Bassaricyon neblina SRX1097850 1     | 0,18596974 |
| Nyctereutes procyonoides NC013700 3 | Mungos mungo MMC7 1                  | 0,1859708  |
| Vulpes vulpes NC008434 5            | Mungotictis decemlineata NC027828 1  | 0,18597175 |
| Vulpes corsac NC023958 1            | Mustela putorius NC020638 4          | 0,18597206 |
| Urva semitorquata MH464789 1        | Arctocepalus pusillus NC008417 1     | 0,18597214 |
| Martes pennanti NC020664 16         | Eupleres goudotii D128 1             | 0,18597326 |
| Panthera onca NC028242 1            | Eumetopias jubatus NC004030 10       | 0,18597339 |
| Felis nigripes NC028309 1           | Canis mesomelas KT448280 1           | 0,18597457 |
| Martes melampus NC009678 1          | Cryptoprocta ferox FC13 1            | 0,18597527 |
| Lynx pardinus NC028319 161          | Ailuurus fulgens styani NC009691 1   | 0,18597556 |
| Lutra lutra LC050126 1              | Hyaena hyaena NC020669 1             | 0,18597676 |
| Panthera uncia NC010638 1           | Enhydra lutris NC009692 1            | 0,18597707 |
| Mustela altaica NC021751 1          | Mungos mungo/gambianus SRR7704821 1  | 0,18597709 |
| Felis nigripes NC028309 1           | Callorhinus ursinus NC008415 1       | 0,18597716 |
| Lutrogale perspicillata NC035811 1  | Leopardus pardalis T262 1            | 0,18597774 |
| Mephitis mephitis NC020648 1        | Civettictis civetta NC033378 1       | 0,18597807 |
| Catopuma badia NC028300 1           | Arctocepalus australis MG023139 1    | 0,18598083 |
| Parahyaena brunnea NC038159 15      | Martes zibellina NC011579 39         | 0,1859818  |
| Vulpes ferrilata NC027935 1         | Felis margarita NC028308 1           | 0,18598205 |
| Vulpes ferrilata NC027935 1         | Puma yagouaroundi NC028311 1         | 0,1859825  |
| Lynx rufus NC014456 3               | Canis anthus NC027956 2              | 0,18598275 |
| Mustela frenata NC020640 1          | Cryptoprocta ferox FC13 1            | 0,18598381 |
| Felis nigripes NC028309 1           | Aonyx cinerea NC035814 2             | 0,1859877  |
| Zalophus wolfebaeki SRR4431565 1    | Galidictis fasciata DM333 1          | 0,18598981 |
| Poecilogale albinocha T602 1        | Civettictis civetta GLC19 1          | 0,18598985 |
| Ursus arctos isabellinus 18B5 2     | Paradoxurus jerdoni MH464793 1       | 0,18598931 |
| Ursus arctos EU497665 29            | Otaria byronia OTAB 1                | 0,1859903  |
| Otocyon megalotis SAF1 2            | Felis catus NC001700 2               | 0,18599062 |
| Parahyaena brunnea NC038159 15      | Arctodus simus NC011116 1            | 0,18599351 |
| Parahyaena brunnea NC038159 15      | Canis adustus KT448271 1             | 0,1859937  |
| Lycan pictus NC028427 2             | Leopardus tigrinus NC028317 1        | 0,18599522 |
| Lutra sumatrana NC035810 1          | Ailuropoda melanoleuca NC009492 5    | 0,18599552 |
| Zalophus wolfebaeki SRR4431565 1    | Genetta genetta T297 1               | 0,18599623 |
| Ursus arctos isabellinus 18B5 2     | Catopuma temminckii NC027115 41      | 0,1859968  |
| Ursus thibetanus mupinensis NC00875 | Lycan pictus NC028427 2              | 0,18599881 |
| Panthera onca NC028242 1            | Bassariscus sumichrasti SRX1099089 1 | 0,18599917 |
| Paradoxurus hermaphroditus NC039591 | Lycan pictus NC028427 2              | 0,18599947 |
| Lontra canadensis SRR10409165 1     | Leopardus colocolo NC028314 1        | 0,18600123 |
| Taxidea taxus NC020646 1            | Panthera leo spelaea XK258452 2      | 0,18600138 |
| Viverricula indica XK891751 1       | Ursus arctos AP012576 6              | 0,18600228 |
| Urva javanica/auropunctata NC006835 | Canis anthus NC027956 2              | 0,18600248 |
| Ursus arctos isabellinus 18B5 2     | Arctocepalus forsteri NC004023 27    | 0,18600538 |
| Ursus arctos AP012576 6             | Otaria byronia OTAB 1                | 0,18600602 |
| Helarctos malayanus NC009968 2      | Felis margarita NC028308 1           | 0,18600671 |
| Mungos mungo MMC7 1                 | Arctocepalus forsteri NC004023 28    | 0,18601116 |
| Poecilogale albinocha T602 1        | Canis lupus familiaris NC002008 1231 | 0,18601188 |
| Zalophus californianus NC008416 1   | Genetta genetta T297 1               | 0,18601191 |
| Panthera pardus japonensis KJ866876 | Canis lupus chanco NC010340 4        | 0,18601404 |
| Civettictis civetta NC033378 1      | Arctocepalus australis MG023139 1    | 0,18601507 |
| Civettictis civetta NC033378 1      | Arctocepalus forsteri KT693377 17    | 0,18601513 |
| Neofelis nebulosa NC008450 3        | Mustela frenata NC020640 1           | 0,18601556 |
| Mustela nivalis T306 5              | Urva javanica/auropunctata NC006835  | 0,18601595 |
| Ursus arctos GU573486 5             | Acinonyx jubatus NC005212 3          | 0,1860161  |
| Mustela sibirica NC020637 6         | Cuon alpinus NC013445 3              | 0,18601781 |
| Zalophus californianus NC008416 1   | Panthera tigris amoyensis NC014770 2 | 0,18601938 |
| Potos flavus T414 1                 | Panthera pardus NC010641 5           | 0,18602155 |
| Galictis vittata T412 1             | Acinonyx jubatus NC005212 3          | 0,18602192 |
| Canis lupus chanco NC010340 4       | Bassariscus sumichrasti SRX1099089 1 | 0,18602289 |
| Canis lupus chanco NC010340 4       | Arctotherium sp NC030174 1           | 0,18602298 |
| Leopardus guigna NC028321 1         | Arctocepalus forsteri NC004023 28    | 0,18602306 |
| Spilogale putorius NC010497 1       | Genetta servalina NC024568 2         | 0,18602541 |
| Ursus americanus JX196366 3         | Leopardus geoffroyi NC028320 1       | 0,18602806 |
| Martes melampus NC009678 1          | Eupleres goudotii D128 1             | 0,18603075 |
| Leopardus tigrinus NC028317 1       | Cuon alpinus NC013445 3              | 0,18603079 |
| Prionailurus viverrinus NC028305 1  | Tapirus terrestris T358              | 0,18603139 |
| Ursus thibetanus laniger MH281753 2 | Canis lupus familiaris NC002008 1231 | 0,18603314 |
| Martes americana NC020642 1         | Atilax paludinosus T606 1            | 0,18603322 |
| Phocarcos hookeri NC008418 1        | Chrotogale owstoni T607 1            | 0,1860334  |
| Atilax paludinosus T606 1           | Arctonyx collaris NC020645 1         | 0,18603335 |
| Martes zibellina NC011579 39        | Cynictis penicillata T375 1          | 0,18603399 |
| Bdeogale nigripes GLC15 1           | Arctonyx collaris NC020645 1         | 0,1860342  |
| Mustela putorius NC020638 4         | Urva brachyura KY117547 1            | 0,18603471 |
| Vulpes zerdia KI603240 1            | Melogale moschata V0735A 1           | 0,18603615 |
| Urva semitorquata MH464789 1        | Canis anthus NC027956 2              | 0,18603656 |
| Melogale moschata KP726273 1        | Canis latrans NC008093 7             | 0,18603697 |
| Procyon lotor AB462049 4            | Arctocepalus australis MG023139 1    | 0,18603705 |
| Neophoca cinerea NC008419 1         | Atilax paludinosus T606 1            | 0,18603732 |
| Lynx pardinus NC028319 161          | Canis mesomelas KT448280 1           | 0,18603799 |
| Mustela eversmanni NC028013 1       | Diplogale hosei MH464790 1           | 0,18603812 |
| Meles leucurus NC039173 4           | Canis anthus NC027956 2              | 0,18603839 |
| Viverricula indica XK891751 1       | Callorhinus ursinus NC008415 1       | 0,18603864 |
| Mustela sibirica NC020637 6         | Galidictis fasciata DM333 1          | 0,1860387  |
| Salanoia concolor D378 1            | Mustela sibirica NC020637 6          | 0,18603885 |
| Martes martes T302 3                | Eupleres goudotii D128 1             | 0,18604089 |
| Melogale moschata NC020644 1        | Cynictis penicillata T375 1          | 0,18604158 |
| Mustela putorius NC020638 4         | Galerella sanguinea T378 1           | 0,18604384 |
| Mustela altaica NC021751 1          | Eupleres goudotii D128 1             | 0,18604483 |
| Genetta genetta T297 1              | Arctocepalus townsendi NC008420 1    | 0,18604498 |
| Canis latrans NC008093 7            | Bassariscus sumichrasti SRX1099089 1 | 0,18604587 |
| Prionodon linsang ERR2391707 1      | Arctodus simus NC011116 1            | 0,18604599 |
| Ursus arctos EU497665 29            | Melogale moschata V0735A 1           | 0,18604685 |
| Viverra tangalunga MH464792 1       | Panthera pardus japonensis KJ866876  | 0,18604755 |
| Pardofelis marmorata NLN3 2         | Melogale moschata V0735A 1           | 0,18604805 |
| Mustela nivalis T306 5              | Galidictis fasciata DM333 1          | 0,18604812 |
| Vulpes corsac NC023958 1            | Mustela nivalis T306 5               | 0,18604819 |
| Potos flavus T414 1                 | Cryptoprocta ferox FC13 1            | 0,18604934 |
| Vulpes lagopus NC026529 3           | Leopardus tigrinus NC028317 1        | 0,18604939 |
| Prionodon pardicolor NC024569 2     | Mustela eversmanni NC028013 1        | 0,18604946 |

|                                        |                                       |            |
|----------------------------------------|---------------------------------------|------------|
| Felis chaus NCO28307 1                 | Eupleres goudotii D128 1              | 0,15265171 |
| Prionailurus bengalensis NCO28301 12   | Ichneumia albicauda T603 1            | 0,15265253 |
| Otocolobus manul NCO28323 1            | Ichneumia albicauda T603 1            | 0,1526531  |
| Viverricula indica NCO25296 2          | Cryptoprocta ferox CF C13 1           | 0,1526555  |
| Profelis aurata NCO28299 1             | Mungotictis decemlineata NCO27828 1   | 0,15265727 |
| Prionodon pardicolor NCO24569 2        | Paradoxurus hermaphroditus NCO39591 1 | 0,15265913 |
| Urva javanica T413 1                   | Arctictis binturong T605 2            | 0,15266033 |
| Urva semitorquata MH464789 1           | Arctictis binturong T605 2            | 0,15266103 |
| Mungos mungo/gambianus SRR7704821 1    | Arctictis binturong T605 2            | 0,15266109 |
| Lynx rufus NCO14456 3                  | Hyaena hyaena NCO20669 1              | 0,15266274 |
| Ursus thibetanus formosanus NCO09331 1 | Catopuma temminckii NCO09492 5        | 0,15266322 |
| Prionailurus viverrinus NCO28305 1     | Cryptoprocta ferox CF C13 1           | 0,15266402 |
| Lynx canadensis NCO28313 1             | Diplogale hosei MH464790 1            | 0,15270182 |
| Viverra zibetha T609 1                 | Eupleres goudotii D128 1              | 0,15271114 |
| Genetta genetta T297 1                 | Bdeogale nigripes GLC15 1             | 0,15271579 |
| Mungos mungo MMC7 1                    | Lynx canadensis NCO28313 1            | 0,15271629 |
| Profelis aurata NCO28299 1             | Urva brachyura KY117547 1             | 0,15271699 |
| Lynx pardinus NCO28319 161             | Bdeogale nigripes GLC15 1             | 0,15271704 |
| Galerella sanguinea T378 1             | Catopuma temminckii NCO27115 41       | 0,15271775 |
| Genetta servalina NCO24568 2           | Galidia elegans D146 1                | 0,15271789 |
| Leopardus jacobita NCO28322 1          | Cynictis penicillata T375 1           | 0,15271804 |
| Homotherium latidens MF871702 3        | Galidictis fasciata DM333 1           | 0,15271819 |
| Panthera pardus NCO10641 5             | Hemigalus derbyanus MH464791 1        | 0,1527205  |
| Cryptoprocta ferox CF C13 1            | Catopuma temminckii NCO27115 41       | 0,15272281 |
| Zalophus wolfebaeki SRR4431565 1       | Odobenus rosmarus NCO04029 29         | 0,15272374 |
| Paradoxurus jerdoni MH464793 1         | Leopardus guigna NCO28321 1           | 0,15272613 |
| Salanoia concolor D378 1               | Hemigalus derbyanus MH464791 1        | 0,15275313 |
| Panthera pardus NCO10641 5             | Fossa fossana D350 1                  | 0,15275484 |
| Viverricula indica KX891751 1          | Eupleres goudotii D128 1              | 0,15277776 |
| Prionodon linsang ERR2391707 1         | Genetta genetta T297 1                | 0,15278216 |
| Smilodon populator MF871700 1          | Mungos mungo/gambianus SRR7704821 1   | 0,15278429 |
| Otocolobus manul NCO28323 1            | Mungos mungo/gambianus SRR7704821 1   | 0,15278576 |
| Prionodon linsang ERR2391707 1         | Catopuma temminckii NCO27115 41       | 0,15278646 |
| Otocolobus manul NCO28323 1            | Galerella sanguinea T378 1            | 0,15278703 |
| Prionailurus bengalensis CKM45 20      | Urva brachyura KY117547 1             | 0,15278724 |
| Leopardus guigna NCO28321 1            | Urva javanica T413 1                  | 0,15278748 |
| Leopardus tigrinus NCO28317 1          | Atilax paludinosus T606 1             | 0,15278807 |
| Proteles cristata T393 6               | Galidictis fasciata DM333 1           | 0,15278919 |
| Genetta genetta T297 1                 | Galerella sanguinea T378 1            | 0,15279399 |
| Leopardus jacobita NCO28322 1          | Hyaena hyaena NCO20669 1              | 0,15280066 |
| Smilodon populator MF871700 1          | Cryptoprocta ferox CF C13 1           | 0,15280679 |
| Suricata suricatta SSM10 1             | Hemigalus derbyanus MH464791 1        | 0,15281686 |
| Otaria byronia OTAB 1                  | Ommatophoca rossii AY377287etc 1      | 0,15283197 |
| Viverricula indica KX891751 1          | Suricata suricatta SSM10 1            | 0,15284853 |
| Potos flavus T414 1                    | Bassaricyon sumichrasti SRX1099089 1  | 0,15284859 |
| Urva javanica T413 1                   | Genetta genetta T297 1                | 0,15285053 |
| Panthera leo spelaea KX258452 2        | Fossa fossana D350 1                  | 0,15285181 |
| Prionailurus rubiginosus NCO28304 2    | Urva javanica T413 1                  | 0,15285191 |
| Lynx lynx NCO27083 4                   | Ichneumia albicauda T603 1            | 0,15285224 |
| Panthera uncia KP202269 1              | Fossa fossana D350 1                  | 0,15285267 |
| Felis catus NCO01700 2                 | Eupleres goudotii D128 1              | 0,15285368 |
| Galidia elegans D146 1                 | Catopuma temminckii NCO27115 41       | 0,15285505 |
| Leopardus geoffroyi NCO28320 1         | Eupleres goudotii D128 1              | 0,15285589 |
| Ursus maritimus GU573488 Svalbard      | Ailuropoda melanoleuca NCO09492 5     | 0,15285763 |
| Prionailurus viverrinus NCO28305 1     | Hyaena hyaena NCO20669 1              | 0,15286708 |
| Panthera leo spelaea KX258452 2        | Genetta abyssinica MG489822 1         | 0,1528721  |
| Proteles cristata T393 6               | Prionailurus bengalensis NCO28301 12  | 0,15287469 |
| Leopardus colocolo NCO28314 1          | Urva javanica/auropunctata NCO06835 1 | 0,15290016 |
| Paguma larvata PDD511 2                | Xenogale naso C07XAR110 1             | 0,15291548 |
| Viverricula indica KX891751 1          | Urva brachyura KY117547 1             | 0,152916   |
| Viverricula indica KX891751 1          | Helogale parvula SRR7637809 1         | 0,15291603 |
| Phocarcos hookeri NCO08418 1           | Odobenus rosmarus NCO04029 29         | 0,15291867 |
| Leopardus pardalis NCO28315 2          | Urva brachyura KY117547 1             | 0,15291987 |
| Pardofelis marmorata NLN3 2            | Crossarchus platycephalus C7R66 1     | 0,15291917 |
| Urva brachyura KY117547 1              | Catopuma badia NCO28300 1             | 0,15291952 |
| Lynx pardinus NCO28319 161             | Atilax paludinosus T606 1             | 0,15291975 |
| Lynx pardinus NCO28319 161             | Ichneumia albicauda T603 1            | 0,15292037 |
| Helogale parvula SRR7637809 1          | Caracal caracal NCO28306 1            | 0,15292077 |
| Leopardus guigna NCO28321 1            | Cynictis penicillata T375 1           | 0,15292218 |
| Ichneumia albicauda T603 1             | Hyaena hyaena NCO20669 1              | 0,15292294 |
| Panthera uncia KP202269 1              | Galidictis fasciata DM333 1           | 0,15292433 |
| Puma yagouaroundi NCO28311 1           | Galidia elegans D146 1                | 0,15292604 |
| Cynictis penicillata T375 1            | Acinonyx jubatus NCO05212 3           | 0,15293311 |
| Leopardus guigna NCO28321 1            | Hyaena hyaena NCO20669 1              | 0,15293464 |
| Prionodon linsang ERR2391707 1         | Felis chaus NCO28307 1                | 0,15293819 |
| Suricata suricatta SSM10 1             | Genetta servalina NCO24568 2          | 0,1529388  |
| Genetta genetta T297 1                 | Cynictis penicillata T375 1           | 0,15298484 |
| Lynx pardinus NCO28319 161             | Helogale parvula SRR7637809 1         | 0,15298627 |
| Felis chaus NCO28307 1                 | Crossarchus platycephalus C7R66 1     | 0,15298714 |
| Felis chaus NCO28307 1                 | Atilax paludinosus T606 1             | 0,1529882  |
| Puma yagouaroundi NCO28311 1           | Eupleres goudotii D128 1              | 0,15298933 |
| Leopardus jacobita NCO28322 1          | Galerella sanguinea T378 1            | 0,1529897  |
| Leopardus geoffroyi NCO28320 1         | Galerella sanguinea T378 1            | 0,15299021 |
| Hemigalus derbyanus MH464791 1         | Galidictis fasciata DM333 1           | 0,15299523 |
| Panthera tigris amoyensis NCO14770 2   | Genetta genetta T297 1                | 0,15299737 |
| Homotherium latidens MF871702 3        | Atilax paludinosus T606 1             | 0,15301009 |
| Panthera leo NERO 19                   | Galidictis fasciata DM333 1           | 0,15302557 |
| Neofelis nebulosa NCO08450 3           | Genetta abyssinica MG489822 1         | 0,15303725 |
| Helogale parvula SRR7637809 1          | Genetta servalina NCO24568 2          | 0,15305136 |
| Lynx rufus NCO14456 3                  | Bdeogale nigripes GLC15 1             | 0,15305361 |
| Lynx canadensis NCO28313 1             | Atilax paludinosus T606 1             | 0,15305384 |
| Xenogale naso C07XAR110 1              | Caracal caracal NCO28306 1            | 0,15305389 |
| Mungos mungo/gambianus SRR7704821 1    | Caracal caracal NCO28306 1            | 0,15305515 |
| Viverricula indica KX891751 1          | Panthera uncia KP202269 1             | 0,15305665 |
| Suricata suricatta SSM10 1             | Prionailurus bengalensis CKM45 20     | 0,15305765 |
| Panthera uncia KP202269 1              | Genetta genetta T297 1                | 0,15305875 |
| Viverra zibetha T609 1                 | Galerella sanguinea T378 1            | 0,15306269 |
| Mungos mungo/gambianus SRR7704821 1    | Acinonyx jubatus NCO05212 3           | 0,15306893 |
| Galidia elegans D146 1                 | Acinonyx jubatus NCO05212 3           | 0,15307538 |
| Prionodon pardicolor NCO24569 2        | Arctictis binturong T605 2            | 0,1530755  |
| Homotherium latidens MF871702 3        | Urva semitorquata MH464789 1          | 0,15308549 |
| Urocyon cinereoargenteus NCO26723 21   | Speothos venaticus C48 2              | 0,15310735 |
| Leptailurus serval NCO28316 1          | Xenogale naso C07XAR110 1             | 0,15312123 |

|                                        |                                       |            |
|----------------------------------------|---------------------------------------|------------|
| Melogale moschata V0735A 1             | Caracal caracal NCO28306 1            | 0,18604955 |
| Neophoca cinerea NCO08419 1            | Ichneumia albicauda T603 1            | 0,18604964 |
| Vulpes zerda KJ603240 1                | Smilodon populator MF871700 1         | 0,18605037 |
| Phocarcos hookeri NCO08418 1           | Lynx rufus NCO14456 3                 | 0,18605095 |
| Martes pennanti NCO20664 16            | Galerella sanguinea T378 1            | 0,18605132 |
| Phocarcos hookeri NCO08418 1           | Leopardus pardalis NCO28315 1         | 0,18605216 |
| Vulpes lagopus NCO26529 3              | Leopardus geoffroyi NCO28320 1        | 0,18605256 |
| Genetta genetta T297 1                 | Arctocephalus pusillus NCO08417 1     | 0,18605407 |
| Mustela nivalis T306 5                 | Hyaena hyaena NCO20669 1              | 0,18605632 |
| Martes pennanti NCO20664 16            | Felis chaus NCO28307 1                | 0,18605685 |
| Ursus arctos EU497665 29               | Arctodus simus NCO11116 1             | 0,1860572  |
| Ursus arctos GU573486 5                | Lutra sumatrana NCO35810 1            | 0,18605836 |
| Otaria byronia OTAB 1                  | Leopardus guigna NCO28321 1           | 0,18605934 |
| Ursus arctos isabellinus 18B5 2        | Prionailurus rubiginosus NCO28304 2   | 0,18606129 |
| Panthera onca NCO22842 1               | Nyctereutes procyonoides NCO13700 3   | 0,18606143 |
| Ursus arctos EU497665 29               | Catopuma temminckii NCO27115 41       | 0,18606456 |
| Enhydra lutris NCO09692 1              | Canis lupus familiaris NCO02008 1231  | 0,18606627 |
| Ommatophoca rossii AY377287etc 1       | Tapirus terrestris T358               | 0,18606766 |
| Salanoia concolor D378 1               | Canis lupus chanco NCO10340 4         | 0,1860688  |
| Galictis vittata T412 1                | Civettictis civetta GLC19 1           | 0,18606897 |
| Ursus spelaeus EU327344 13             | Puma concolor NCO16470 20             | 0,18606928 |
| Ursus arctos GU573486 5                | Leopardus geoffroyi NCO28320 1        | 0,18607105 |
| Paradoxurus jerdoni MH464793 1         | Martes flavigula NCO12143 3           | 0,18607184 |
| Urva javanica/auropunctata NCO06835 1  | Enhydra lutris NCO09692 1             | 0,18607195 |
| Galictis vittata T412 1                | Felis catus NCO01700 2                | 0,18607253 |
| Melursus ursinus NCO09970 2            | Lynx canadensis NCO28313 1            | 0,18607275 |
| Ursus spelaeus EU327344 13             | Prionailurus bengalensis CKM45 20     | 0,18607295 |
| Mustela putorius NCO20638 4            | Urva javanica/auropunctata NCO06835 1 | 0,18607329 |
| Ursus thibetanus laniger MH281753 2    | Prionailurus planiceps KY682741 4     | 0,18607344 |
| Ursus thibetanus laniger MH281753 2    | Prionailurus bengalensis NCO28301 12  | 0,18607484 |
| Ursus thibetanus thibetanus NCO11118 1 | Profelis aurata NCO28299 1            | 0,18607549 |
| Vulpes zerda KJ603240 1                | Homotherium latidens MF871702 3       | 0,1860767  |
| Ursus maritimus GU573488 Svalbard      | Acinonyx jubatus NCO05212 3           | 0,18607716 |
| Ursus maritimus NCO03428 31            | Acinonyx jubatus NCO05212 3           | 0,18607719 |
| Spilogale putorius NCO10497 1          | Melogale moschata V0735A 1            | 0,18607721 |
| Spilogale putorius NCO10497 1          | Melogale moschata KP726273 1          | 0,18607795 |
| Chrysocyon brachyurus NCO24172 1       | Ailuropoda melanoleuca NCO09492 5     | 0,18608193 |
| Prionailurus viverrinus NCO28305 1     | Canis lupus familiaris NCO02008 1231  | 0,18608357 |
| Mustela putorius NCO20638 4            | Cuon alpinus NCO13445 3               | 0,186085   |
| Otocolobus manul NCO28323 1            | Arctocephalus forsteri NCO04023 28    | 0,18608524 |
| Nyctereutes procyonoides NCO13700 3    | Martes flavigula NCO12143 3           | 0,1860856  |
| Felis silvestris lybica KP202275 4     | Cuon alpinus NCO13445 3               | 0,18609223 |
| Smilodon populator MF871700 1          | Cuon alpinus NCO13445 3               | 0,18609279 |
| Ursus americanus JX196366 3            | Prionailurus rubiginosus NCO28304 2   | 0,18609346 |
| Mustela altaica NCO21751 1             | Cuon alpinus NCO13445 3               | 0,18609409 |
| Felis margarita NCO28308 1             | Eumetopias jubatus NCO04030 10        | 0,186096   |
| Profelis aurata NCO28299 1             | Tapirus terrestris T358               | 0,18609752 |
| Prionodon pardicolor NCO24569 2        | Canis lupus chanco NCO10340 4         | 0,18609914 |
| Ursus arctos GU573486 5                | Smilodon populator MF871700 1         | 0,1860999  |
| Urva brachyura KY117547 1              | Arctonyx collaris NCO20645 1          | 0,18610057 |
| Mustela sibirica NCO20637 6            | Eupleres goudotii D128 1              | 0,18610074 |
| Martes melampus NCO09678 1             | Galidia elegans D146 1                | 0,18610153 |
| Lutra sumatrana NCO35810 1             | Galidia elegans D146 1                | 0,18610314 |
| Bassaricyon neblina SRX1097850 1       | Arctocephalus townsendi NCO08420 1    | 0,18610382 |
| Suricata suricatta SSM10 1             | Potos flavus T414 1                   | 0,18610385 |
| Salanoia concolor D378 1               | Mustela kathina NCO23210 1            | 0,18610764 |
| Galidia elegans D146 1                 | Arctonyx collaris NCO20645 1          | 0,18610767 |
| Meles leucurus NCO39173 4              | Galerella sanguinea T378 1            | 0,18610825 |
| Melogale moschata NCO20644 1           | Urva javanica T413 1                  | 0,18610837 |
| Leopardus pardalis NCO28315 1          | Tapirus terrestris T358               | 0,18610841 |
| Vulpes vulpes NCO08434 5               | Melogale moschata NCO20644 1          | 0,18611139 |
| Panthera onca KP202264 2               | Arctonyx collaris NCO20645 1          | 0,18611217 |
| Prionodon linsang ERR2391707 1         | Ommatophoca rossii AY377287etc 1      | 0,18611224 |
| Genetta genetta T297 1                 | Arctocephalus forsteri KT693377 17    | 0,18611312 |
| Caracal caracal NCO28306 1             | Ailuurus fulgens NCO11124 1           | 0,18611379 |
| Martes zibellina NCO11579 39           | Lyacon pictus NCO28427 2              | 0,18611404 |
| Tremarctos ornatus NCO09969 2          | Genetta genetta T297 1                | 0,18611406 |
| Mustela nigripes NCO24942 1            | Hyaena hyaena NCO20669 1              | 0,18611486 |
| Otocolobus manul NCO28323 1            | Arctocephalus forsteri KT693377 17    | 0,18611594 |
| Parahaena brunnea NCO38159 15          | Martes americana NCO20642 1           | 0,18611643 |
| Vulpes ferrillata NCO27935 1           | Profelis aurata NCO28299 1            | 0,18611677 |
| Vulpes zerda KJ603240 1                | Felis silvestris lybica KP202275 4    | 0,18611684 |
| Bassaricyon neblina SRX1097850 1       | Arctodus simus NCO11116 1             | 0,18611711 |
| Leopardus jacobita NCO28322 1          | Canis latrans NCO08093 7              | 0,18611859 |
| Ursus maritimus GU573488 Svalbard      | Lutra sumatrana NCO35810 1            | 0,18611917 |
| Prionailurus bengalensis CKM45 20      | Arctocephalus townsendi NCO08420 1    | 0,18611947 |
| Ursus arctos pruinus MG066703 3        | Arctocephalus gazella BK010918 1      | 0,18612231 |
| Viverricula indica KX891745 1          | Ursus maritimus GU573488 Svalbard     | 0,18612224 |
| Viverricula indica KX891745 1          | Ursus maritimus NCO03428 31           | 0,18612242 |
| Galictis vittata T412 1                | Arctocephalus australis MGO23139 1    | 0,18612331 |
| Mustela sibirica AP017394 11           | Ailuropoda melanoleuca NCO09492 5     | 0,18612759 |
| Leopardus geoffroyi NCO28320 1         | Arctotherium sp NCO30174 1            | 0,18612768 |
| Helogale parvula SRR7637809 1          | Canis aureus KT448274 1               | 0,18612868 |
| Urva javanica T413 1                   | Canis aureus KT448274 1               | 0,18612885 |
| Vulpes ferrillata NCO27935 1           | Ommatophoca rossii AY377287etc 1      | 0,1861293  |
| Melursus ursinus NCO09970 2            | Meles anakuma NCO09677 1              | 0,1861316  |
| Parahaena brunnea NCO38159 15          | Martes foina NCO20643 1               | 0,18613169 |
| Ictonyx striatus T299 1                | Genetta genetta T297 1                | 0,18613246 |
| Ursus thibetanus thibetanus NCO11118 1 | Canis latrans NCO08093 7              | 0,18613295 |
| Ursus thibetanus laniger MH281753 2    | Phocarcos hookeri NCO08418 1          | 0,18613301 |
| Zalophus wolfebaeki SRR4431565 1       | Ailuropoda melanoleuca NCO09492 5     | 0,18613428 |
| Zalophus wolfebaeki SRR4431565 1       | Leopardus guigna NCO28321 1           | 0,18613522 |
| Ursus spelaeus EU327344 13             | Leopardus tigrinus NCO28317 1         | 0,18613599 |
| Prionodon pardicolor NCO24569 2        | Canis aureus KT448274 1               | 0,18613678 |
| Ursus spelaeus EU327344 13             | Felis chaus NCO28307 1                | 0,18613699 |
| Mustela eversmanni NCO28013 1          | Arctocephalus forsteri NCO04023 28    | 0,18613772 |
| Bassaricyon sumichrasti SRX1099089 1   | Ailuropoda melanoleuca NCO09492 5     | 0,18613966 |
| Canis aureus KT448274 1                | Arctotherium sp NCO30174 1            | 0,18614005 |
| Prionailurus planiceps KY682741 4      | Galictis vittata T412 1               | 0,18614054 |
| Vulpes corsac NCO23958 1               | Ommatophoca rossii AY377287etc 1      | 0,18614163 |
| Ursus arctos pruinus MG066703 3        | Arctictis binturong T605 2            | 0,18614449 |
| Panthera uncia NCO10638 1              | Ommatophoca rossii AY377287etc 1      | 0,18614875 |
| Lutra lutra NCO11358 9                 | Chrotogale owstoni T607 1             | 0,18615364 |

|                                          |                                       |            |
|------------------------------------------|---------------------------------------|------------|
| Puma concolor NC016470 22                | Helogale parvula SRR7637809 1         | 0,15312195 |
| Leptailurus serval NC028316 1            | Galerella sanguinea T378 1            | 0,15312347 |
| Pardofelis marmorata NLN3 2              | Eupleres goudotii D128 1              | 0,15312357 |
| Leopardus geoffroyi NC028320 1           | Galidia elegans D146 1                | 0,15312783 |
| Ursus arctos GU573486 5                  | Ailuropoda melanoleuca NC009492 5     | 0,15313278 |
| Ursus colocolo NC028314 1                | Xenogale naso C07XAR110 1             | 0,1531338  |
| Hyaena hyaena NC020669 1                 | Urva javanica/auropunctata NC006835 1 | 0,1531567  |
| Lynx rufus NC014456 3                    | Galerella sanguinea T378 1            | 0,15318869 |
| Genetta genetta T297 1                   | Galidia elegans D146 1                | 0,15318985 |
| Leopardus guigna NC028321 1              | Helogale parvula SRR7637809 1         | 0,15319191 |
| Leopardus guigna NC028321 1              | Ichneumia albicauda T603 1            | 0,15319365 |
| Salanoia concolor D378 1                 | Felis chaus NC028307 1                | 0,15319557 |
| Cryptoprocta ferox FC13 1                | Caracal caracal NC028306 1            | 0,15319927 |
| Leopardus geoffroyi NC028320 1           | Hyaena hyaena NC020669 1              | 0,15320374 |
| Leopardus colocolo NC028314 1            | Urva brachyura KY117547 1             | 0,15320586 |
| Parahyaena brunnea NC038159 15           | Leopardus geoffroyi NC028320 1        | 0,15320751 |
| Prionodon pardicolor NC024569 2          | Panthera onca NC022842 1              | 0,15320876 |
| Urva semitorquata MH464789 1             | Chrotogale owstoni T607 1             | 0,15323789 |
| Prionodon linsang ERR2391707 1           | Lynx lynx NC027083 4                  | 0,15325116 |
| Mungos mungo/gambianus SRR7704821 1      | Felis silvestris lybica KP202275 4    | 0,15325566 |
| Mungos mungo/gambianus SRR7704821 1      | Felis margarita NC028308 1            | 0,15325607 |
| Helogale parvula SRR7637809 1            | Felis margarita NC028308 1            | 0,15325637 |
| Leopardus pardalis T262 1                | Bdeogale nigripes GLC15 1             | 0,15325768 |
| Mungotictis decemlineata NC027828 1      | Felis nigripes NC028309 1             | 0,15326205 |
| Prionodon pardicolor NC024569 2          | Paradoxurus jerdoni MH464793 1        | 0,15326495 |
| Ursus spelaeus NC011112 8                | Ailuropoda melanoleuca NC009492 5     | 0,15327267 |
| Nandinia binotata NC024567 1             | Diplogale hosei MH464790 1            | 0,15328267 |
| Urva brachyura KY117547 1                | Civettictis civetta NC03378 1         | 0,1532862  |
| Smilodon populator MF871700 1            | Galidictis fasciata DM333 1           | 0,15330154 |
| Xenogale naso C07XAR110 1                | Genetta abyssinica MG489822 1         | 0,15331778 |
| Paguma larvata PDD511 2                  | Bdeogale nigripes GLC15 1             | 0,15331963 |
| Profelis aurata NC028299 1               | Prionodon linsang ERR2391707 1        | 0,15331976 |
| Lynx canadensis NC028313 1               | Helogale parvula SRR7637809 1         | 0,15332247 |
| Felis silvestris lybica KP202275 4       | Cynictis penicillata T375 1           | 0,15332247 |
| Prionailurus planiceps KY682741 4        | Bdeogale nigripes GLC15 1             | 0,15332398 |
| Prionailurus planiceps NC028312 6        | Galerella sanguinea T378 1            | 0,15332454 |
| Leopardus guigna NC028321 1              | Urva brachyura KY117547 1             | 0,15332566 |
| Prionailurus bengalensis CKM45 20        | Cynictis penicillata T375 1           | 0,15332679 |
| Otaria byronia OTAB 1                    | Odobenus rosmarus NC004029 29         | 0,15332703 |
| Panthera onca NC022842 1                 | Paguma larvata PDD511 2               | 0,15333456 |
| Urva javanica/auropunctata NC006835 1    | Caracal caracal NC028306 1            | 0,15335611 |
| Paradoxurus hermaphroditus NLNC 1        | Panthera leo NERO 19                  | 0,15335618 |
| Prionodon linsang ERR2391707 1           | Diplogale hosei MH464790 1            | 0,15337904 |
| Genetta genetta T297 1                   | Eupleres goudotii D128 1              | 0,15338655 |
| Profelis aurata NC028299 1               | Helogale parvula SRR7637809 1         | 0,15339208 |
| Leopardus wiedii NC028318 1              | Bdeogale nigripes GLC15 1             | 0,1533924  |
| Galidictis fasciata DM333 1              | Crocota crocata NC020670 3            | 0,15339595 |
| Galidia elegans D146 1                   | Felis margarita NC028308 1            | 0,15339653 |
| Panthera tigris amoyensis NC014770 2     | Fossa fossana D350 1                  | 0,15339799 |
| Leptailurus serval NC028316 1            | Cryptoprocta ferox FC13 1             | 0,15340132 |
| Urva javanica T413 1                     | Diplogale hosei MH464790 1            | 0,15341173 |
| Smilodon populator MF871700 1            | Mungotictis decemlineata NC027828 1   | 0,15342522 |
| Lynx rufus NC014456 3                    | Urva javanica/auropunctata NC006835 1 | 0,15342684 |
| Odobenus rosmarus NC004029 29            | Eumetopias jubatus NC004030 10        | 0,15343158 |
| Cynogale bennetti KY117544 1             | Catopuma badia NC028300 1             | 0,15343894 |
| Urocyon littoralis catalinae KP129018 15 | Speothos venaticus C48 2              | 0,15344399 |
| Urva javanica/auropunctata NC006835 1    | Diplogale hosei MH464790 1            | 0,1534458  |
| Prionodon linsang ERR2391707 1           | Lynx canadensis NC028313 1            | 0,15345326 |
| Xenogale naso C07XAR110 1                | Catopuma badia NC028300 1             | 0,15345666 |
| Eupleres goudotii D128 1                 | Catopuma temminckii NC027115 41       | 0,15345713 |
| Profelis aurata NC028299 1               | Mungos mungo MMC7 1                   | 0,15345785 |
| Prionailurus planiceps NC028312 6        | Bdeogale nigripes GLC15 1             | 0,1534587  |
| Prionailurus viverrinus NC028305 1       | Bdeogale nigripes GLC15 1             | 0,15346046 |
| Leopardus guigna NC028321 1              | Galidia elegans D146 1                | 0,15346442 |
| Prionodon pardicolor NC024569 2          | Genetta genetta T297 1                | 0,15346946 |
| Xenogale naso C07XAR110 1                | Diplogale hosei MH464790 1            | 0,15347438 |
| Leopardus geoffroyi NC028320 1           | Urva javanica/auropunctata NC006835 1 | 0,15349281 |
| Leopardus colocolo NC028314 1            | Cynogale bennetti KY117544 1          | 0,15351996 |
| Prionodon linsang ERR2391707 1           | Felis silvestris lybica KP202275 4    | 0,15352127 |
| Lynx rufus NC014456 3                    | Urva brachyura KY117547 1             | 0,15352312 |
| Paradoxurus jerdoni MH464793 1           | Lynx canadensis NC028313 1            | 0,15352577 |
| Otocolobus manul NC028323 1              | Urva javanica T413 1                  | 0,15352596 |
| Puma concolor NC016470 22                | Bdeogale nigripes GLC15 1             | 0,15352607 |
| Puma yagouaroundi NC028311 1             | Helogale parvula SRR7637809 1         | 0,15352648 |
| Eupleres goudotii D128 1                 | Caracal caracal NC028306 1            | 0,15352805 |
| Prionailurus bengalensis CKM45 20        | Urva javanica T413 1                  | 0,15352857 |
| Ursus maritimus NC003428 31              | Ailuropoda melanoleuca NC009492 5     | 0,15353099 |
| Homotherium latidens MF871702 3          | Xenogale naso C07XAR110 1             | 0,15353853 |
| Ichneumia albicauda T603 1               | Acinonyx jubatus NC005212 3           | 0,15354189 |
| Lynx lynx NC027083 4                     | Diplogale hosei MH464790 1            | 0,15357073 |
| Homotherium latidens MF871702 3          | Bdeogale nigripes GLC15 1             | 0,15358081 |
| Paradoxurus hermaphroditus NC039591 1    | Fossa fossana D350 1                  | 0,15358789 |
| Mungos mungo/gambianus SRR7704821 1      | Lynx canadensis NC028313 1            | 0,15359148 |
| Pardofelis marmorata NLN3 2              | Mungos mungo/gambianus SRR7704821 1   | 0,15359236 |
| Lynx canadensis NC028313 1               | Ichneumia albicauda T603 1            | 0,15359311 |
| Prionailurus viverrinus NC028305 1       | Cynictis penicillata T375 1           | 0,15359397 |
| Puma yagouaroundi NC028311 1             | Galerella sanguinea T378 1            | 0,15359457 |
| Leopardus geoffroyi NC028320 1           | Urva brachyura KY117547 1             | 0,15359493 |
| Salanoia concolor D378 1                 | Panthera uncia KP202269 1             | 0,15359795 |
| Mungos mungo/gambianus SRR7704821 1      | Felis chaus NC028307 1                | 0,15360634 |
| Galerella sanguinea T378 1               | Felis silvestris lybica KP202275 4    | 0,1536607  |
| Viverricula indica NC025296 2            | Galidia elegans D146 1                | 0,15366575 |
| Paguma larvata PDD511 2                  | Urva brachyura KY117547 1             | 0,15372404 |
| Paradoxurus hermaphroditus NC039591 1    | Lynx canadensis NC028313 1            | 0,15372734 |
| Otocolobus manul NC028323 1              | Mungos mungo MMC7 1                   | 0,15372747 |
| Helogale parvula SRR7637809 1            | Felis nigripes NC028309 1             | 0,15372767 |
| Caracal caracal NC028306 1               | Bdeogale nigripes GLC15 1             | 0,15372868 |
| Leopardus pardalis NC028315 1            | Bdeogale nigripes GLC15 1             | 0,1537288  |
| Leptailurus serval NC028316 1            | Bdeogale nigripes GLC15 1             | 0,15372884 |
| Hyaena hyaena NC020669 1                 | Bdeogale nigripes GLC15 1             | 0,15372922 |
| Prionailurus viverrinus CKM45 20         | Xenogale naso C07XAR110 1             | 0,15373041 |
| Prionailurus bengalensis NC028305 1      | Galerella sanguinea T378 1            | 0,15373085 |
| Smilodon populator MF871700 1            | Salanoia concolor D378 1              | 0,15373227 |

|                                      |                                      |            |
|--------------------------------------|--------------------------------------|------------|
| Canis lupus familiaris NC002008 1231 | Arctodus simus NC011116 1            | 0,18615371 |
| Ursus thibetanus mupinensis NC008795 | Canis lupus familiaris NC002008 1231 | 0,18615603 |
| Ursus arctos GU573491 207            | Spilogale putorius NC010497 1        | 0,18615827 |
| Conepatus chinga NC042596 1          | Canis adustus KT448271 1             | 0,1861618  |
| Mustela itatsi NC034330 19           | Lycalopex sechurae KT448284 1        | 0,18616195 |
| Poecilogale albinucha T602 1         | Canis mesomelas KT448280 1           | 0,18616214 |
| Pardofelis marmorata NLN3 2          | Eumetopias jubatus NC004030 10       | 0,18616302 |
| Prionodon linsang ERR2391707 1       | Canis mesomelas KT448280 1           | 0,18616515 |
| Martes americana NC020642 1          | Eupleres goudotii D128 1             | 0,18616778 |
| Cynogale bennetti KY117544 1         | Conepatus chinga NC042596 1          | 0,18616791 |
| Melogale moschata V0735A 1           | Xenogale naso C07XAR110 1            | 0,18616793 |
| Ursus arctos pruinusos MG066703 3    | Gulo gulo NC009685 3                 | 0,18616842 |
| Mustela putorius NC020638 4          | Atilax paludinosus T606 1            | 0,18616915 |
| Mustela sibirica AP017394 1          | Xenogale naso C07XAR110 1            | 0,1861694  |
| Mustela eversmannii NC028013 1       | Cynictis penicillata T375 1          | 0,1861698  |
| Mustela sibirica AP017394 1          | Cynictis penicillata T375 1          | 0,18616986 |
| Profelis aurata NC028299 1           | Canis mesomelas KT448280 1           | 0,1861725  |
| Martes americana NC020642 1          | Hemigalys derbianus MH464791 1       | 0,18617332 |
| Suricata suricatta SSM10 1           | Procyon lotor AB462046 3             | 0,18617371 |
| Panthera tigris NC010642 35          | Eumetopias jubatus NC004030 10       | 0,18617393 |
| Salanoia concolor D378 1             | Mustela itatsi NC034330 19           | 0,18617438 |
| Mustela kathiah NC023210 1           | Galidictis fasciata DM333 1          | 0,18617485 |
| Lynx canadensis NC028313 1           | Conepatus chinga NC042596 1          | 0,18617652 |
| Viverra zibetha T609 1               | Arctocepalus townsendi NC008420 1    | 0,18617655 |
| Cynictis penicillata T375 1          | Bassariscus sumichrasti SRX1099089 1 | 0,18617722 |
| Vulpes vulpes NC008434 5             | Paradoxurus jerdoni MH464793 1       | 0,18617892 |
| Panthera pardus NC010641 5           | Canis aureus KT448274 1              | 0,18617903 |
| Vulpes corsac NC023958 1             | Arctodus simus NC011116 1            | 0,18617968 |
| Mustela altaica NC021751 1           | Canis mesomelas KT448280 1           | 0,18617979 |
| Ursus thibetanus laniger MH281753 2  | Canis lupus chanco NC010340 4        | 0,18618102 |
| Pardofelis marmorata NLN3 2          | Mustela itatsi NC034330 19           | 0,18618174 |
| Martes flavigula NC012141 3          | Cuon alpinus NC013445 3              | 0,18618296 |
| Hyaena hyaena NC020669 1             | Aonyx cinerea NC035814 2             | 0,18618354 |
| Parahyaena brunnea NC038159 15       | Aonyx cinerea NC035814 2             | 0,18618396 |
| Vulpes zerda K1603240 1              | Pardofelis marmorata NLN3 2          | 0,18618412 |
| Otocolobus manul NC028323 1          | Melogale moschata V0735A 1           | 0,18618447 |
| Lynx canadensis NC028313 1           | Arctocepalus gazella BKO10918 1      | 0,18618505 |
| Nyctereutes procyonoides NC013700 3  | Felis catus NC001700 2               | 0,1861864  |
| Procyon lotor AB462046 3             | Genetta genetta T297 1               | 0,18618822 |
| Mungos mungo MMC7 1                  | Chrysocyon brachyurus NC024172 1     | 0,18618836 |
| Potos flavus T414 1                  | Parahyaena brunnea NC038159 15       | 0,18618885 |
| Panthera uncia KP202269 1            | Aonyx cinerea NC035814 2             | 0,18618858 |
| Zalophus wolfebaeki SRR4431565 1     | Atilax paludinosus T606 1            | 0,18618873 |
| Speothos venaticus C48 2             | Mustela kathiah NC023210 1           | 0,18618874 |
| Mustela altaica NC021751 1           | Galerella sanguinea T378 1           | 0,18619068 |
| Puma yagouaroundi NC028311 1         | Otocyon megalotis SAF1 2             | 0,18619213 |
| Otocyon megalotis SAF1 2             | Otocolobus manul NC028323 1          | 0,18619217 |
| Prionailurus planiceps NC028312 6    | Otaria byronia OTAB 1                | 0,18619218 |
| Ursus arctos isabellinus 1885 2      | Paguma larvata PDD511 2              | 0,18619245 |
| Odobenus rosmarus NC004029 29        | Mustela erminea T305 2               | 0,18619248 |
| Prionailurus viverrinus NC028305 1   | Aonyx cinerea NC035814 2             | 0,18619248 |
| Mustela itatsi NC034330 19           | Chrysocyon brachyurus NC024172 1     | 0,1861928  |
| Mustela nivalis T306 5               | Ichneumia albicauda T603 1           | 0,18619317 |
| Ursus spelaeus EU327344 13           | Lutra lutra NC011358 9               | 0,18619338 |
| Panthera onca NC022842 1             | Mustela sibirica NC020637 6          | 0,1861937  |
| Genetta abyssinica MG489822 1        | Galictis vittata T412 1              | 0,18619429 |
| Salanoia concolor D378 1             | Helarctos malayanus NC009968 2       | 0,18619622 |
| Ursus arctos GU573491 207            | Martes foina NC020643 1              | 0,18619668 |
| Ursus arctos pruinusos MG066703 3    | Genetta servalina NC024568 2         | 0,18619716 |
| Meles anakuma NC009677 1             | Ailuropoda melanoleuca NC009492 5    | 0,18619874 |
| Genetta abyssinica MG489822 1        | Cuon alpinus NC013445 3              | 0,1861988  |
| Ursus maritimus NC003428 31          | Catopuma badia NC028300 1            | 0,18619977 |
| Zalophus californianus NC008416 1    | Urva brachyura KY117547 1            | 0,18620202 |
| Ursus maritimus GU573488 Svalbard    | Arctocepalus forsteri NC004023 28    | 0,18620664 |
| Diplogale hosei MH464790 1           | Canis lupus chanco NC010340 4        | 0,1862067  |
| Lynx pardinus NC028319 161           | Galictis vittata T412 1              | 0,18620713 |
| Panthera leo NERO 19                 | Ailurolfulgens styani NC009691 1     | 0,18620723 |
| Ursus thibetanus laniger MH281753 2  | Cryptoprocta ferox FC13 1            | 0,18620847 |
| Prionailurus viverrinus NC028305 1   | Galictis vittata T412 1              | 0,18620889 |
| Ursus spelaeus NC011112 8            | Prionailurus viverrinus NC028305 1   | 0,18620905 |
| Melurus ursinus NC009970 2           | Felis margarita NC028308 1           | 0,18620974 |
| Ursus arctos EU497665 29             | Acinonyx jubatus NC005212 3          | 0,18621185 |
| Panthera pardus NC010641 5           | Arctonyx collaris NC020645 1         | 0,18622047 |
| Lutra lutra LC050126 1               | Chrotogale owstoni T607 1            | 0,18622082 |
| Leopardus pardalis NC028315 1        | Cuon alpinus NC013445 3              | 0,18622564 |
| Ursus arctos isabellinus 1885 2      | Spilogale putorius NC010497 1        | 0,18622564 |
| Paradoxurus jerdoni MH464793 1       | Lutra lutra LC050126 1               | 0,18623078 |
| Lutra lutra LC050126 1               | Xenogale naso C07XAR110 1            | 0,18623132 |
| Enhydra lutris NC009692 1            | Cynictis penicillata T375 1          | 0,18623148 |
| Ursus thibetanus formosanus NC00933  | Canis lupus familiaris NC002008 1231 | 0,18623196 |
| Helogale parvula SRR7637809 1        | Arctonyx collaris NC020645 1         | 0,18623444 |
| Vulpes vulpes NC008434 5             | Enhydra lutris NC009692 1            | 0,18623595 |
| Fossa fossana D350 1                 | Bassariscus neblina SRX1097850 1     | 0,18623698 |
| Mungos mungo MMC7 1                  | Ailurolfulgens styani NC009691 1     | 0,18623698 |
| Mustela eversmannii NC028013 1       | Canis mesomelas KT448280 1           | 0,1862372  |
| Crossarchus cynictisphalus C7R66 1   | Ailurolfulgens styani NC009691 1     | 0,18623765 |
| Melogale moschata V0735A 1           | Galidia elegans D146 1               | 0,1862382  |
| Meles leucurus NC039173 4            | Galidia elegans D146 1               | 0,18623871 |
| Nyctereutes procyonoides NC013700 3  | Urva semitorquata MH464789 1         | 0,1862392  |
| Nyctereutes procyonoides NC013700 3  | Galerella sanguinea T378 1           | 0,18623944 |
| Mustela altaica NC021751 1           | Lycalopex sechurae KT448284 1        | 0,18624057 |
| Procyon lotor AB462049 4             | Pococartes hookeri NC008418 1        | 0,18624072 |
| Procyon lotor AB462049 4             | Mungos mungo MMC7 1                  | 0,18624103 |
| Panthera tigris amoyensis NC014770 2 | Eumetopias jubatus NC004030 10       | 0,18624134 |
| Diplogale hosei MH464790 1           | Chrysocyon brachyurus NC024172 1     | 0,18624143 |
| Vulpes zerda K1603240 1              | Salanoia concolor D378 1             | 0,18624175 |
| Suricata suricatta SSM10 1           | Bassariscus sumichrasti SRX1099089 1 | 0,18624207 |
| Tremarctos ornatus NC009969 2        | Chrotogale owstoni T607 1            | 0,18624231 |
| Lontra canadensis SRR10409165 1      | Canis adustus KT448271 1             | 0,18624233 |
| Galictis canadensis T412 1           | Civettictis civetta NC03378 1        | 0,18624237 |
| Martes pennanti NC020664 1           | Atilax paludinosus T606 1            | 0,18624301 |
| Lutrogale perspicillata NC035811 1   | Arctocepalus forsteri KT693377 17    | 0,18624307 |
| Lynx lynx NC027083 4                 | Ailurolfulgens styani NC009691 1     | 0,18624392 |



|                                       |                                         |            |
|---------------------------------------|-----------------------------------------|------------|
| Galidia elegans D146 1                | Felis catus NCO01700 2                  | 0,15373252 |
| Proteles cristata T393 6              | Mungos mungo MMC7 1                     | 0,15373598 |
| Panthera onca NCO22842 1              | Atilax paludinosus T606 1               | 0,15373677 |
| Salanoia concolor D378 1              | Panthera tigris amoyensis NCO14770 2    | 0,15373819 |
| Ursus arctos AP012576 6               | Ailuropoda melanoleuca NCO09492 5       | 0,15374576 |
| Pardofelis marmorata NLN3 2           | Diplogale hoesi MH464790 1              | 0,15374732 |
| Panthera uncia KP202269 1             | Hemigale derbyanus MH464791 1           | 0,15375456 |
| Panthera leo NERO 19                  | Crossarchus platycephalus C7R66 1       | 0,15375991 |
| Prionailurus viverrinus NCO28305 1    | Urvava javanica/auropunctata NCO06835 1 | 0,15376057 |
| Leopardus wiedii NCO28318 1           | Urvava javanica/auropunctata NCO06835 1 | 0,15376099 |
| Fossa fossana D350 1                  | Diplogale hoesi MH464790 1              | 0,15376467 |
| Puma yagouaroundi NCO28311 1          | Cynogale bennetti KY117544 1            | 0,15376736 |
| Paradoxurus jerdoni MH464793 1        | Crossarchus platycephalus C7R66 1       | 0,15379092 |
| Prionodon pardicolor NCO24569 2       | Chrotogale owstoni T607 1               | 0,15379199 |
| Smilodon populator MF871700 1         | Urvava brachyura KY117547 1             | 0,15379338 |
| Profelis aurata NCO28299 1            | Xenogale naso C07XAR110 1               | 0,1537948  |
| Leopardus pardalis NCO28315 1         | Xenogale naso C07XAR110 1               | 0,15379536 |
| Suricata suricatta SSM10 1            | Leopardus wiedii NCO28318 1             | 0,15379572 |
| Prionailurus planiceps KY682741 4     | Galerella sanguinea T378 1              | 0,15379599 |
| Mungotictis decemlineata NCO27828 1   | Felis chaus NCO28307 1                  | 0,15380135 |
| Leopardus tigrinus NCO28317 1         | Galidia elegans D146 1                  | 0,15380275 |
| Parahyaena brunnea NCO38159 15        | Leopardus tigrinus NCO28317 1           | 0,15381554 |
| Paguma larvata PDS11 2                | Urvava javanica T413 1                  | 0,15385838 |
| Odobenus rosmarus NCO04029 29         | Arctocepalus forsteri KT693377 17       | 0,15385886 |
| Prionailurus rubiginosus NCO28304 2   | Xenogale naso C07XAR110 1               | 0,15386152 |
| Paradoxurus hermaphroditus NCO39591 1 | Lynx lynx NCO27083 4                    | 0,15386195 |
| Hyena hyaena NCO20669 1               | Atilax paludinosus T606 1               | 0,15386382 |
| Galerella sanguinea T378 1            | Caracal caracal NCO28306 1              | 0,15386395 |
| Puma concolor NCO16470 22             | Eupleres goudotii D128 1                | 0,15386462 |
| Panthera uncia NCO10638 1             | Genetta servalina NCO24568 2            | 0,15386553 |
| Panthera onca NCO22842 1              | Crossarchus platycephalus C7R66 1       | 0,15387091 |
| Ichneumia albicauda T603 1            | Genetta genetta T297 1                  | 0,15387289 |
| Puma concolor NCO16470 22             | Parahyaena brunnea NCO38159 15          | 0,15387933 |
| Ommatophoca rossii AY377287etc 1      | Arctocepalus australis MG023139 1       | 0,15390785 |
| Panthera tigris NCO10642 35           | Hemigale derbyanus MH464791 1           | 0,15390955 |
| Panthera pardus japonensis KJ866876 8 | Chrotogale owstoni T607 1               | 0,15392548 |
| Mungos mungo MMC7 1                   | Felis catus NCO01700 2                  | 0,15392884 |
| Prionailurus bengalensis NCO28301 12  | Xenogale naso C07XAR110 1               | 0,15392891 |
| Pardofelis marmorata NLN3 2           | Paradoxurus hermaphroditus NCO39591 1   | 0,15393037 |
| Leopardus geoffroyi NCO28320 1        | Bdeogale nigripes GLC15 1               | 0,15393257 |
| Proteles cristata T393 6              | Eupleres goudotii D128 1                | 0,153933   |
| Ursus arctos GU573491 207             | Ailuropoda melanoleuca NCO09492 5       | 0,15393505 |
| Prionailurus bengalensis KCM45 20     | Ichneumia albicauda T603 1              | 0,15393513 |
| Panthera tigris NCO10642 35           | Fossa fossana D350 1                    | 0,15393685 |
| Paradoxurus hermaphroditus NLNC 1     | Ichneumia albicauda T603 1              | 0,15394017 |
| Crossarchus platycephalus C7R66 1     | Arctictis binturong T605 2              | 0,15394136 |
| Galerella sanguinea T378 1            | Arctictis binturong T605 2              | 0,15395299 |
| Paguma larvata PDS11 2                | Urvava javanica/auropunctata NCO06835 1 | 0,15395847 |
| Paradoxurus hermaphroditus NLNC 1     | Urvava semitorquata MH464789 1          | 0,15395929 |
| Paguma larvata PDS11 2                | Atilax paludinosus T606 1               | 0,15399283 |
| Lynx pardinus NCO28319 161            | Cynictis penicillata T375 1             | 0,15399526 |
| Pardofelis marmorata NLN3 2           | Mungos mungo MMC7 1                     | 0,15399578 |
| Pardofelis marmorata NLN3 2           | Paradoxurus jerdoni MH464793 1          | 0,15399793 |
| Paradoxurus hermaphroditus NLNC 1     | Panthera onca KP202264 2                | 0,15399852 |
| Leopardus tigrinus NCO28317 1         | Helogale parvula SRR7637809 1           | 0,15399969 |
| Profelis aurata NCO28299 1            | Ichneumia albicauda T603 1              | 0,1539997  |
| Proteles cristata T393 6              | Urvava semitorquata MH464789 1          | 0,15400279 |
| Panthera tigris amoyensis NCO14770 2  | Galidictis fasciata DM333 1             | 0,15400803 |
| Cryptoprocta ferox FC13 1             | Crocota crocata NCO20670 3              | 0,15400897 |
| Ursus spelaeus EU327344 13            | Ailuropoda melanoleuca NCO09492 5       | 0,15401366 |
| Melurus ursinus NCO09970 2            | Ailuropoda melanoleuca NCO09492 5       | 0,15401579 |
| Diplogale hoesi MH464790 1            | Cynictis penicillata T375 1             | 0,15402769 |
| Leopardus guigna NCO28321 1           | Urvava javanica/auropunctata NCO06835 1 | 0,15403177 |
| Chrotogale owstoni T607 1             | Atilax paludinosus T606 1               | 0,15404694 |
| Prionodon linsang ERR2391707 1        | Felis catus NCO01700 2                  | 0,15405998 |
| Prionodon linsang ERR2391707 1        | Pardofelis marmorata NLN3 2             | 0,15406001 |
| Prionodon linsang ERR2391707 1        | Felis margarita NCO28308 1              | 0,15406023 |
| Profelis aurata NCO28299 1            | Galerella sanguinea T378 1              | 0,1540661  |
| Leopardus jacobita NCO28322 1         | Helogale parvula SRR7637809 1           | 0,15406705 |
| Panthera uncia KP202269 1             | Mungotictis decemlineata NCO27828 1     | 0,15406924 |
| Prionailurus planiceps KY682741 4     | Galidia elegans D146 1                  | 0,15407006 |
| Panthera pardus japonensis KJ866876 8 | Arctictis binturong T605 2              | 0,1540803  |
| Smilodon populator MF871700 1         | Urvava javanica T413 1                  | 0,15409194 |
| Leptailurus serval NCO28316 1         | Urvava javanica/auropunctata NCO06835 1 | 0,15409686 |
| Panthera leo NERO 19                  | Paguma larvata PDS11 2                  | 0,15409839 |
| Panthera tigris amoyensis NCO14770 2  | Hemigale derbyanus MH464791 1           | 0,15412369 |
| Paradoxurus hermaphroditus NLNC 1     | Urvava javanica T413 1                  | 0,15412737 |
| Paradoxurus hermaphroditus NLNC 1     | Crossarchus platycephalus C7R66 1       | 0,15412758 |
| Panthera uncia KP202269 1             | Crossarchus platycephalus C7R66 1       | 0,15413076 |
| Helogale parvula SRR7637809 1         | Felis catus NCO01700 2                  | 0,15413129 |
| Leopardus tigrinus NCO28317 1         | Cynictis penicillata T375 1             | 0,15413211 |
| Galerella sanguinea T378 1            | Felis margarita NCO28308 1              | 0,15413243 |
| Diplogale hoesi MH464790 1            | Bdeogale nigripes GLC15 1               | 0,15414    |
| Paradoxurus hermaphroditus NLNC 1     | Galerella sanguinea T378 1              | 0,15414034 |
| Mungos mungo MMC7 1                   | Crocota crocata NCO20670 3              | 0,1541431  |
| Parahyaena brunnea NCO38159 15        | Leptailurus serval NCO28316 1           | 0,15414928 |
| Parahyaena brunnea NCO38159 15        | Leopardus jacobita NCO28322 1           | 0,15415232 |
| Mungotictis decemlineata NCO27828 1   | Hemigale derbyanus MH464791 1           | 0,15415335 |
| Neofelis nebulosa NCO08450 3          | Fossa fossana D350 1                    | 0,15416011 |
| Prionodon linsang ERR2391707 1        | Caracal caracal NCO28306 1              | 0,15419486 |
| Paguma larvata PDS11 2                | Helogale parvula SRR7637809 1           | 0,15419513 |
| Panthera leo spelaeus KX258452 2      | Galidictis fasciata DM333 1             | 0,15419684 |
| Puma concolor NCO16470 22             | Cynictis penicillata T375 1             | 0,15419827 |
| Urvava javanica T413 1                | Caracal caracal NCO28306 1              | 0,15419894 |
| Suricata suricatta SSM10 1            | Prionailurus viverrinus NCO28305 1      | 0,15420084 |
| Panthera onca KP202264 2              | Paguma larvata PDS11 2                  | 0,15420136 |
| Parahyaena brunnea NCO38159 15        | Urvava brachyura KY117547 1             | 0,15420184 |
| Leopardus guigna NCO28321 1           | Bdeogale nigripes GLC15 1               | 0,1542021  |
| Helogale parvula SRR7637809 1         | Acinonyx jubatus NCO05212 3             | 0,15421426 |
| Panthera leo NERO 19                  | Chrotogale owstoni T607 1               | 0,15422513 |
| Panthera uncia NCO10638 1             | Genetta abyssinica MG489822 1           | 0,15423809 |
| Suricata suricatta SSM10 1            | Opomphoca rossii AY377287etc 1          | 0,15426512 |
| Lynx canadensis NCO28313 1            | Bdeogale nigripes GLC15 1               | 0,15426522 |

|                                      |                                       |            |
|--------------------------------------|---------------------------------------|------------|
| Mustela frenata NCO20640 1           | Galidia elegans D146 1                | 0,18624477 |
| Paradoxurus hermaphroditus NLNC 1    | Melogale moschata V0735A 1            | 0,18624492 |
| Viverricula indica NCO25296 2        | Arctocepalus townsendi NCO08420 1     | 0,18624675 |
| Mustela altaica NCO21751 1           | Xenogale naso C07XAR110 1             | 0,18624739 |
| Panthera onca KP202264 2             | Mustela evermanni NCO28013 1          | 0,18624941 |
| Felis margarita NCO28308 1           | Arctocepalus australis MG023139 1     | 0,18625036 |
| Mustela nivalis T306 5               | Mungotictis decemlineata NCO27828 1   | 0,18625066 |
| Lycan pictus NCO28427 2              | Bdeogale nigripes GLC15 1             | 0,18625109 |
| Panthera onca KP202264 2             | Nyctereutes procyonoides NCO13700 3   | 0,186252   |
| Leopardus jacobita NCO28322 1        | Arctocepalus australis MG023139 1     | 0,18625247 |
| Prionailurus viverrinus NCO28305 1   | Arctocepalus australis MG023139 1     | 0,18625256 |
| Puma concolor NCO16470 22            | Lontra canadensis SRR10409165 1       | 0,18625304 |
| Panthera pardicolor NCO24569 2       | Potos flavus T414 1                   | 0,18625344 |
| Phocarcos hookeri NCO08418 1         | Catopuma badia NCO28300 1             | 0,18625373 |
| Panthera tigris NCO10642 35          | Meles meles T303 3                    | 0,1862544  |
| Nyctereutes procyonoides NCO13700 3  | Caracal caracal NCO28306 1            | 0,18625495 |
| Viverricula indica KX891745 1        | Ursus arctos GU573491 207             | 0,18625569 |
| Mephitis mephitis NCO20648 1         | Chrotogale owstoni T607 1             | 0,1862572  |
| Hyena hyaena NCO20669 1              | Arctodus simus NCO11116 1             | 0,18625724 |
| Mustela nivalis T306 5               | Galerella sanguinea T378 1            | 0,18625756 |
| Phoca largha NCO08430 1              | Paradoxurus hermaphroditus NCO39591   | 0,18625772 |
| Leopardus jacobita NCO28322 1        | Arctotherium sp NCO30174 1            | 0,18625858 |
| Diplogale hoesi MH464790 1           | Canis latrans NCO08093 7              | 0,18625948 |
| Otocyon megalotis SAF1 2             | Leptailurus serval NCO28316 1         | 0,18625955 |
| Panthera onca NCO22842 1             | Mustela sibirica AP017394 11          | 0,18626098 |
| Ursus thibetanus laniger MH281753 2  | Prionodon linsang ERR2391707 1        | 0,1862637  |
| Ursus maritimus GU573488 Svalbard    | Catopuma temminckii NCO27115 41       | 0,18626638 |
| Ursus thibetanus mupinensis NCO0879  | Prionodon linsang ERR2391707 1        | 0,18626645 |
| Arctonyx colliaris NCO20645 1        | Ailuropoda melanoleuca NCO09492 5     | 0,1862673  |
| Zalophus wollebaeki SRR4431565 1     | Puma concolor NCO16470 22             | 0,18626797 |
| Ursus arctos AP012576 6              | Phocarcos hookeri NCO08418 1          | 0,18626836 |
| Martes melampus NCO09678 1           | Hemigale derbyanus MH464791 1         | 0,18626894 |
| Prionailurus bengalensis NCO28301 12 | Mephitis mephitis NCO20648 1          | 0,18627045 |
| Ursus spelaeus EU327344 13           | Lynx canadensis NCO28313 1            | 0,18627048 |
| Xenogale naso C07XAR110 1            | Canis lupus familiaris NCO02008 1231  | 0,18627287 |
| Mustela sibirica NCO20637 6          | Urvava javanica/auropunctata NCO06835 | 0,18627483 |
| Otocolobus manul NCO28323 1          | Galictis vittata T412 1               | 0,18627539 |
| Lutra sumatrana NCO35810 1           | Urvava javanica/auropunctata NCO06835 | 0,18627566 |
| Leopardus jacobita NCO28322 1        | Galictis vittata T412 1               | 0,18627582 |
| Melurus ursinus NCO09970 2           | Felis catus NCO01700 2                | 0,18627618 |
| Odobenus rosmarus NCO04029 29        | Martes foina NCO20643 1               | 0,1862765  |
| Genetta abyssinica MG489822 1        | Tapirus terrestris T358               | 0,18627761 |
| Ursus arctos isabellinus 1885 2      | Acinonyx jubatus NCO05212 3           | 0,18627872 |
| Panthera leo NERO 19                 | Canis latrans NCO08093 7              | 0,18628305 |
| Panthera leo NERO 19                 | Arctonyx colliaris NCO20645 1         | 0,18628332 |
| Eupleres goudotii D128 1             | Eumetopias jubatus NCO04030 10        | 0,18628469 |
| Prionailurus rubiginosus NCO28304 2  | Arctocepalus forsteri NCO04023 28     | 0,18628849 |
| Gulo gulo NCO09685 3                 | Caracal caracal NCO28306 1            | 0,18629198 |
| Ursus americanus JX196366 3          | Leopardus wiedii NCO28318 1           | 0,18629335 |
| Poecilogale albinucha T602 1         | Civettictis civetta NCO33378 1        | 0,18629539 |
| Ichneumia albicauda T603 1           | Eumetopias jubatus NCO04030 10        | 0,18629608 |
| Panthera leo spelaeus KX258452 2     | Canis lupus chanco NCO10340 4         | 0,18629654 |
| Mungos mungo MMC7 1                  | Martes melampus NCO09678 1            | 0,18629763 |
| Leopardus tigrinus NCO28317 1        | Canis mesomelas KT448280 1            | 0,18629836 |
| Paradoxurus hermaphroditus NLNC 1    | Lutra lutra LC050126 1                | 0,18629849 |
| Martes melampus NCO09678 1           | Bdeogale nigripes GLC15 1             | 0,18629965 |
| Meles anakuma NCO09677 1             | Eupleres goudotii D128 1              | 0,18630053 |
| Lontra canadensis SRR10409165 1      | Crossarchus platycephalus C7R66 1     | 0,18630126 |
| Mungos mungo MMC7 1                  | Tapirus terrestris T358               | 0,18630134 |
| Otaria byronia OTAB 1                | Civettictis civetta NCO33378 1        | 0,18630193 |
| Melogale moschata KP726273 1         | Helogale parvula SRR7637809 1         | 0,18630205 |
| Mustela itatsi NCO34330 19           | Cynictis penicillata T375 1           | 0,18630531 |
| Viverra tangalunga MH464792 1        | Bdeogale nigripes GLC15 1             | 0,18630536 |
| Vulpes ferrilata NCO27935 1          | Crossarchus platycephalus C7R66 1     | 0,18630636 |
| Nyctereutes procyonoides NCO13700 3  | Atilax paludinosus T606 1             | 0,18630658 |
| Galidictis fasciata DM333 1          | Aonyx cinerea NCO35814 2              | 0,18630888 |
| Mustela itatsi NCO34330 19           | Galidictis fasciata DM333 1           | 0,18630894 |
| Galidictis fasciata DM333 1          | Canis latrans NCO08093 7              | 0,18630968 |
| Spilogale putorius NCO10497 1        | Helarctos malayanus NCO09968 2        | 0,18631005 |
| Panthera uncia KP202269 1            | Lutra lutra NCO11358 9                | 0,18631355 |
| Mustela itatsi NCO34330 19           | Galerella sanguinea T378 1            | 0,18631393 |
| Paradoxurus hermaphroditus NCO39591  | Mustela sibirica NCO20637 6           | 0,1863163  |
| Civettictis civetta NCO33378 1       | Arctocepalus forsteri NCO04023 28     | 0,18631631 |
| Mustela itatsi NCO34330 19           | Cryptoprocta ferox FC13 1             | 0,18631697 |
| Martes foina NCO20643 1              | Xenogale naso C07XAR110 1             | 0,18631718 |
| Vulpes vulpes NCO08434 5             | Panthera pardus japonensis KJ866876   | 0,18631734 |
| Otocolobus manul NCO28323 1          | Arctocepalus townsendi NCO08420 1     | 0,18631764 |
| Leptailurus serval NCO28316 1        | Arctocepalus forsteri KT693377 17     | 0,18631792 |
| Lynx rufus NCO14456 3                | Arctocepalus townsendi NCO08420 1     | 0,18631797 |
| Lynx lynx NCO27083 4                 | Arctocepalus townsendi NCO08420 1     | 0,18631802 |
| Mustela itatsi NCO34330 19           | Ichneumia albicauda T603 1            | 0,18631807 |
| Vulpes ferrilata NCO27935 1          | Lynx lynx NCO27083 4                  | 0,18631819 |
| Vulpes ferrilata NCO27935 1          | Prionailurus viverrinus NCO28305 1    | 0,18631847 |
| Vulpes ferrilata NCO27935 1          | Leopardus tigrinus NCO28317 1         | 0,18631859 |
| Paradoxurus jerdoni MH464793 1       | Martes pennanti NCO20664 16           | 0,18631877 |
| Leopardus tigrinus NCO28317 1        | Arctocepalus townsendi NCO08420 1     | 0,18631947 |
| Canis latrans NCO08093 7             | Arctotherium sp NCO30174 1            | 0,18631949 |
| Potos flavus T414 1                  | Hyena hyaena NCO20669 1               | 0,18631971 |
| Tremarctos ornatus NCO09969 2        | Puma concolor NCO16470 22             | 0,18631977 |
| Paradoxurus hermaphroditus NLNC 1    | Nyctereutes procyonoides NCO13700 3   | 0,18632038 |
| Felis chaus NCO28307 1               | Canis anthus NCO27956 2               | 0,18632187 |
| Tremarctos ornatus NCO09969 2        | Felis chaus NCO28307 1                | 0,18632284 |
| Panthera tigris NCO10642 35          | Meles anakuma NCO09677 1              | 0,18632405 |
| Ursus arctos EU497665 29             | Mustela altaica NCO21751 1            | 0,18632586 |
| Otocyon megalotis SAF1 2             | Martes foina NCO20643 1               | 0,1863299  |
| Viverricula indica KX891745 1        | Ursus arctos GU573486 5               | 0,18633085 |
| Lutrogale perspicillata NCO35811 1   | Leopardus colocolo NCO28314 1         | 0,18633235 |
| Ursus thibetanus mupinensis NCO0879  | Prionailurus viverrinus NCO28305 1    | 0,18633242 |
| Ursus maritimus GU573488 Svalbard    | Catopuma badia NCO28300 1             | 0,18633449 |
| Martes melampus NCO09678 1           | Urvava javanica/auropunctata NCO06835 | 0,18633465 |
| Mustela itatsi NCO34330 19           | Melurus ursinus NCO09970 2            | 0,18633503 |
| Paradoxurus hermaphroditus NCO39591  | Ommatophoca rossii AY377287etc 1      | 0,18633692 |
| Proteles cristata T393 6             | Martes foina NCO20643 1               | 0,18633702 |

|                                       |                                       |            |
|---------------------------------------|---------------------------------------|------------|
| Prionailurus planiceps NC028312 6     | Xenogale naso C07XAR110 1             | 0,15426548 |
| Prionailurus viverrinus NC028305 1    | Urva brachyura KY117547 1             | 0,1542666  |
| Nandinia binotata NC024567 1          | Hyaeena hyaena NC020669 1             | 0,15426764 |
| Lynx pardinus NC028319 161            | Urva javanica/auropunctata NC006835 1 | 0,15429671 |
| Odobenus rosmarus NC004029 29         | Arctocepalus australis MG023139 1     | 0,15433013 |
| Lynx pardinus NC028319 161            | Urva javanica T413 1                  | 0,15433197 |
| Panthera onca KP202264 2              | Atilax paludinosus T606 1             | 0,15433335 |
| Cynictis penicillata T375 1           | Catopuma temminckii NC027115 41       | 0,15433353 |
| Prionailurus viverrinus NC028305 1    | Xenogale naso C07XAR110 1             | 0,15433517 |
| Panthera uncia NC010638 1             | Galidictis fasciata DM333 1           | 0,15433845 |
| Prionailurus planiceps NC028312 6     | Urva javanica/auropunctata NC006835 1 | 0,15433951 |
| Galidictis fasciata DM333 1           | Felis chaus NC028307 1                | 0,15434077 |
| Salanoia concolor D378 1              | Arctictis binturong T605 2            | 0,15435179 |
| Leopardus pardalis NC028315 1         | Urva javanica/auropunctata NC006835 1 | 0,15436698 |
| Profelis aurata NC028299 1            | Urva javanica/auropunctata NC006835 1 | 0,15436706 |
| Leopardus jacobita NC028322 1         | Cynogale bennetti KY117544 1          | 0,15437151 |
| Xenogale naso C07XAR110 1             | Chrotogale owstoni T607 1             | 0,15438378 |
| Homotherium latidens MF871702 3       | Cynictis penicillata T375 1           | 0,15439595 |
| Urva javanica T413 1                  | Felis silvestris lybica KP202275 4    | 0,15439977 |
| Panthera onca KP202264 2              | Crossarchus platycephalus C7R66 1     | 0,15439989 |
| Puma concolor NC016470 22             | Urva javanica T413 1                  | 0,15440018 |
| Leopardus jacobita NC028322 1         | Urva javanica T413 1                  | 0,15440144 |
| Salanoia concolor D378 1              | Paguma larvata PDD511 2               | 0,15440264 |
| Urva javanica/auropunctata NC006835 1 | Acinonyx jubatus NC005212 3           | 0,15445027 |
| Odobenus rosmarus NC004029 29         | Arctocepalus gazella BK010918 1       | 0,1544656  |
| Helogale parvula SRR7637809 1         | Genetta genetta T297 1                | 0,15446633 |
| Suricata suricatta SSM10 1            | Lynx lynx NC027083 4                  | 0,1544672  |
| Mungos mungo/gambianus SRR7704821 1   | Felis catus NC001700 2                | 0,15446763 |
| Urva semitorquata MH464789 1          | Felis chaus NC028307 1                | 0,15446863 |
| Suricata suricatta SSM10 1            | Leopardus pardalis NC028315 1         | 0,15446897 |
| Ursus arctos EU497665 29              | Ailuropoda melanoleuca NC009492 5     | 0,15447368 |
| Puma yagouaroundi NC028311 1          | Hyaeena hyaena NC020669 1             | 0,15448073 |
| Galerella sanguinea T378 1            | Acinonyx jubatus NC005212 3           | 0,15448397 |
| Prionailurus planiceps NC028312 6     | Urva javanica/auropunctata NC006835 1 | 0,15449981 |
| Neofelis nebulosa NC008450 3          | Genetta genetta T297 1                | 0,15450227 |
| Puma concolor NC016470 22             | Urva javanica/auropunctata NC006835 1 | 0,15450346 |
| Homotherium latidens MF871702 3       | Urva brachyura KY117547 1             | 0,15451176 |
| Panthera pardus NC010641 5            | Arctictis binturong T605 2            | 0,15451397 |
| Galerella sanguinea T378 1            | Chrotogale owstoni T607 1             | 0,15453032 |
| Prionailurus planiceps KY682741 4     | Urva javanica T413 1                  | 0,15453477 |
| Prionailurus planiceps NC028312 6     | Urva javanica T413 1                  | 0,1545348  |
| Suricata suricatta SSM10 1            | Prionailurus planiceps NC028312 6     | 0,15453506 |
| Panthera uncia NC010638 1             | Fossa fossana D350 1                  | 0,1545359  |
| Ichneumia albicauda T603 1            | Caracal caracal NC028306 1            | 0,15453836 |
| Odobenus rosmarus NC004029 29         | Mirounga leonina NC008422 1           | 0,15453944 |
| Panthera onca KP202264 2              | Galidictis fasciata DM333 1           | 0,15454067 |
| Felis chaus NC028307 1                | Cryptoprocta ferox CFC13 1            | 0,15454552 |
| Panthera leo spelaea KX258452 2       | Arctictis binturong T605 2            | 0,15454545 |
| Prionailurus planiceps KY682741 4     | Urva javanica/auropunctata NC006835 1 | 0,15456697 |
| Leptailurus serval NC028316 1         | Cynogale bennetti KY117544 1          | 0,15457518 |
| Suricata suricatta SSM10 1            | Diplogale hoesi MH464790 1            | 0,15457973 |
| Urva brachyura KY117547 1             | Caracal caracal NC028306 1            | 0,15460242 |
| Suricata suricatta SSM10 1            | Pardofelis marmorata NLN3 2           | 0,15460251 |
| Profelis aurata NC028299 1            | Urva javanica T413 1                  | 0,15460287 |
| Parahyaena brunnea NC038159 15        | Nandinia binotata NC024567 1          | 0,15460695 |
| Salanoia concolor D378 1              | Panthera uncia NC010638 1             | 0,15460798 |
| Parahyaena brunnea NC038159 15        | Acinonyx jubatus NC005212 3           | 0,15463877 |
| Paradoxurus hermaphroditus NC039591 1 | Urva semitorquata MH464789 1          | 0,15466608 |
| Lynx canadensis NC028313 1            | Urva javanica T413 1                  | 0,15466803 |
| Lynx rufus NC014456 3                 | Cynictis penicillata T375 1           | 0,15466854 |
| Suricata suricatta SSM10 1            | Prionailurus planiceps KY682741 4     | 0,15466973 |
| Paguma larvata PDD511 2               | Galidictis fasciata DM333 1           | 0,15467229 |
| Puma concolor NC016470 22             | Galidia elegans D146 1                | 0,1546763  |
| Homotherium latidens MF871702 3       | Urva javanica/auropunctata NC006835 1 | 0,15467742 |
| Mungos mungo/gambianus SRR7704821 1   | Crocota crocata NC020670 3            | 0,15467809 |
| Panthera uncia NC010638 1             | Hemigalus derbyanus MH464791 1        | 0,15468143 |
| Ichneumia albicauda T603 1            | Arctictis binturong T605 2            | 0,15469515 |
| Prionailurus bengalensis CKM45 20     | Urva javanica/auropunctata NC006835 1 | 0,15470649 |
| Lynx rufus NC014456 3                 | Diplogale hoesi MH464790 1            | 0,15470666 |
| Galerella sanguinea T378 1            | Diplogale hoesi MH464790 1            | 0,15471897 |
| Paradoxurus hermaphroditus NLNC 1     | Bdeogale nigripes GLC15 1             | 0,1547333  |
| Paradoxurus hermaphroditus NLNC 1     | Urva brachyura KY117547 1             | 0,15473361 |
| Felis margarita NC028308 1            | Cynictis penicillata T375 1           | 0,15473677 |
| Viverricula indica KX891751 1         | Galidia elegans D146 1                | 0,15473834 |
| Leopardus jacobita NC028322 1         | Xenogale naso C07XAR110 1             | 0,15473846 |
| Profelis aurata NC028299 1            | Eupleres goudotii D128 1              | 0,15473971 |
| Galidia elegans D146 1                | Crocota crocata NC020670 3            | 0,15474284 |
| Panthera tigris amoyensis NC014770 2  | Mungotictis decemlineata NC027828 1   | 0,15474786 |
| Urva brachyura KY117547 1             | Arctictis binturong T605 2            | 0,15474814 |
| Parahyaena brunnea NC038159 15        | Catopuma badia NC028300 1             | 0,15475199 |
| Suricata suricatta SSM10 1            | Leopardus colocolo NC028314 1         | 0,15475528 |
| Puma yagouaroundi NC028311 1          | Proteles cristata T393 6              | 0,15476    |
| Urva javanica/auropunctata NC006835 1 | Catopuma temminckii NC027115 41       | 0,1547702  |
| Paradoxurus hermaphroditus NLNC 1     | Xenogale naso C07XAR110 1             | 0,15480049 |
| Paradoxurus hermaphroditus NLNC 1     | Atilax paludinosus T606 1             | 0,15480056 |
| Paradoxurus jerdoni MH464793 1        | Urva semitorquata MH464789 1          | 0,15480083 |
| Viverricula indica KX891745 1         | Cryptoprocta ferox CFC13 1            | 0,15480439 |
| Otocolobus manul NC028323 1           | Helogale parvula SRR7637809 1         | 0,1548062  |
| Ichneumia albicauda T603 1            | Felis silvestris lybica KP202275 4    | 0,15480633 |
| Viverricula indica KX891751 1         | Panthera uncia NC010638 1             | 0,15480718 |
| Parahyaena brunnea NC038159 15        | Felis silvestris lybica KP202275 4    | 0,15482192 |
| Prionailurus planiceps NC028312 6     | Parahyaena brunnea NC038159 15        | 0,15482232 |
| Odobenus rosmarus NC004029 29         | Arctocepalus forsteri NC004023 28     | 0,15486868 |
| Prionailurus planiceps NC028312 6     | Urva brachyura KY117547 1             | 0,15487085 |
| Felis catus NC001700 2                | Cynictis penicillata T375 1           | 0,15487111 |
| Puma yagouaroundi NC028311 1          | Urva javanica T413 1                  | 0,15487215 |
| Genetta genetta T297 1                | Cryptoprocta ferox CFC13 1            | 0,15487249 |
| Paradoxurus hermaphroditus NLNC 1     | Panthera pardus japonensis KJ866876 8 | 0,15487379 |
| Paradoxurus jerdoni MH464793 1        | Galerella sanguinea T378 1            | 0,1548811  |
| Panthera onca NC022842 1              | Eupleres goudotii D128 1              | 0,15488157 |
| Prionodon pardicolor NC024569 2       | Panthera pardus japonensis KJ866876 8 | 0,15488391 |
| Panthera pardus NC010641 5            | Chrotogale owstoni T607 1             | 0,15490209 |
| Leopardus pardalis T262 1             | Cynogale bennetti KY117544 1          | 0,15491015 |

|                                        |                                       |            |
|----------------------------------------|---------------------------------------|------------|
| Martes martes T302 3                   | Arctictis binturong T605 2            | 0,18633729 |
| Lycalopex sechurae KT448284 1          | Helarctos malayanus NC009968 2        | 0,18634009 |
| Ursus thibetanus formosanus NC009333 1 | Leptailurus serval NC028316 1         | 0,18634236 |
| Leopardus jacobita NC028322 1          | Helarctos malayanus NC009968 2        | 0,18634355 |
| Poecilogale albinucha T602 1           | Helarctos malayanus NC009968 2        | 0,18634406 |
| Panthera leo NERO 19                   | Callorhinus ursinus NC008415 1        | 0,18634504 |
| Procyon lotor AB462049 4               | Canis lupus familiaris NC002008 1231  | 0,18634641 |
| Ursus arctos EU497665 29               | Leopardus colocolo NC028314 1         | 0,18634859 |
| Meles meles T303 3                     | Lycalopex sechurae KT448284 1         | 0,18634869 |
| Ursus maritimus NC003428 31            | Leopardus colocolo NC028314 1         | 0,18634869 |
| Spilogale putorius NC010497 1          | Arctotherium sp NC030174 1            | 0,18634932 |
| Potos flavus T414 1                    | Urva javanica/auropunctata NC006835 1 | 0,18635133 |
| Mephitis mephitis NC020648 1           | Leopardus colocolo NC028314 1         | 0,18635558 |
| Mustela putorius NC020638 4            | Lycalopex sechurae KT448284 1         | 0,18635947 |
| Viverra zibetha T609 1                 | Spilogale putorius NC010497 1         | 0,18636237 |
| Felis silvestris lybica KP202275 4     | Eumetopias jubatus NC004030 10        | 0,18636516 |
| Prionodon pardicolor NC024569 2        | Cuon alpinus NC013445 3               | 0,18636656 |
| Mungos mungo MMC7 1                    | Conepatus chinga NC042596 1           | 0,18636765 |
| Spilogale putorius NC010497 1          | Galictis vittata T412 1               | 0,18636845 |
| Meles anakuma NC009677 1               | Urva brachyura KY117547 1             | 0,18636891 |
| Leopardus guigna NC028321 1            | Canis mesomelas KT448280 1            | 0,18636982 |
| Viverra tangalunga MH464792 1          | Eupleres goudotii D128 1              | 0,18637049 |
| Tremarctos ornatus NC009969 2          | Cynictis penicillata T375 1           | 0,18637101 |
| Tremarctos ornatus NC009969 2          | Mungos mungo MMC7 1                   | 0,18637137 |
| Eupleres goudotii D128 1               | Arctocepalus forsteri KT693377 17     | 0,18637301 |
| Paradoxurus jerdoni MH464793 1         | Martes melampus NC009678 1            | 0,18637444 |
| Spilogale putorius NC010497 1          | Chrysocyon brachyurus NC024172 1      | 0,18637453 |
| Salanoia concolor D378 1               | Mustela sibirica AP017394 11          | 0,18637555 |
| Otaria byronia OTAB 1                  | Lutrogale perspicillata NC035811 1    | 0,18637682 |
| Cynictis penicillata T375 1            | Arctocepalus pusillus NC008417 1      | 0,18637777 |
| Chrotogale owstoni T607 1              | Canis latrans NC008093 7              | 0,18637773 |
| Ursus arctos AP012576 6                | Civettictis civetta NC033378 1        | 0,18637812 |
| Lynx lynx NC027083 4                   | Ailuurs fulgens NC011124 1            | 0,18637879 |
| Procyon lotor AB462046 3               | Nyctereutes procyonoides NC013700 3   | 0,18637961 |
| Vulpes lagopus NC026529 3              | Genetta abyssinica MG489822 1         | 0,1863801  |
| Felis chaus NC028307 1                 | Conepatus chinga NC042596 1           | 0,18638127 |
| Mustela itatzi NC034330 19             | Hyaeena hyaena NC020669 1             | 0,18638339 |
| Catopuma temminckii NC027115 41        | Arctocepalus australis MG023139 1     | 0,18638475 |
| Enhydra lutris NC009692 1              | Canis aureus KT448274 1               | 0,18638493 |
| Vulpes corsac NC023958 1               | Prionailurus planiceps NC028312 6     | 0,18638572 |
| Lynx lynx NC027083 4                   | Arctocepalus gazella BK010918 1       | 0,18638678 |
| Urocyon cinereoargenteus NC026723 2    | Lynx pardinus NC028319 161            | 0,18638687 |
| Ursus thibetanus laniger MH281753 2    | Conepatus chinga NC042596 1           | 0,18638815 |
| Proteles cristata T393 6               | Martes americana NC020642 1           | 0,18638881 |
| Ursus arctos pruinusos MG066703 3      | Lutra sumatrana NC035810 1            | 0,18638881 |
| Zalophus wollebaeki SRR4431565 1       | Urva brachyura KY117547 1             | 0,18638955 |
| Odobenus rosmarus NC004029 29          | Mustela frenata NC020640 1            | 0,18639208 |
| Mephitis mephitis NC020648 1           | Melogale moschata V0735A 1            | 0,18639327 |
| Felis nigripes NC028309 1              | Arctotherium sp NC030174 1            | 0,18639313 |
| Pardofelis marmorata NLN3 2            | Arctotherium sp NC030174 1            | 0,18639316 |
| Prionailurus viverrinus NC028305 1     | Arctotherium sp NC030174 1            | 0,18639384 |
| Otocyon megalotis SAF 1 2              | Neovison vison NC020641 3             | 0,18639416 |
| Lycyaon pictus NC028427 2              | Bassariscus sumichrasti SRX1099089 1  | 0,18639486 |
| Urva semitorquata MH464789 1           | Galictis vittata T412 1               | 0,18639579 |
| Ursus maritimus NC003428 31            | Lynx lynx NC027083 4                  | 0,18639614 |
| Poecilogale albinucha T602 1           | Catopuma badia NC028300 1             | 0,18639621 |
| Ursus maritimus GUS73488 Svalbard      | Leopardus pardalis NC028315 1         | 0,18639696 |
| Ursus maritimus NC003428 31            | Leopardus pardalis NC028315 1         | 0,18639699 |
| Prionailurus bengalensis CKM45 20      | Otocyon megalotis SAF 1 2             | 0,18639798 |
| Ursus thibetanus laniger MH281753 2    | Lontra canadensis SRR10409165 1       | 0,18639843 |
| Speothos venaticus C48 2               | Puma concolor NC016470 22             | 0,18639955 |
| Zalophus californianus NC008416 1      | Lontra canadensis SRR10409165 1       | 0,18640004 |
| Speothos venaticus C48 2               | Caracal caracal NC028306 1            | 0,1864001  |
| Martes pennanti NC020664 16            | Canis mesomelas KT448280 1            | 0,18640041 |
| Ursus spelaeus EU327344 13             | Salanoia concolor D378 1              | 0,18640077 |
| Ursus arctos pruinusos MG066703 3      | Canis adustus KT448271 1              | 0,18640141 |
| Chrysocyon brachyurus NC024172 1       | Arctodus simus NC011116 1             | 0,18640511 |
| Melursus ursinus NC009970 2            | Civettictis civetta GLC19 1           | 0,18640687 |
| Ursus arctos GUS73486 5                | Catopuma temminckii NC027115 41       | 0,18640704 |
| Melogale moschata KP726273 1           | Canis lupus familiaris NC002008 1231  | 0,18640763 |
| Urva javanica T413 1                   | Canis lupus familiaris NC002008 1231  | 0,186408   |
| Ursus arctos GUS73491 207              | Galictis vittata T412 1               | 0,18640849 |
| Ursus thibetanus laniger MH281753 2    | Paradoxurus hermaphroditus NLNC 1     | 0,186409   |
| Helarctos malayanus NC009968 2         | Felis silvestris lybica KP202275 4    | 0,18641041 |
| Urva semitorquata MH464789 1           | Eumetopias jubatus NC004030 10        | 0,18641683 |
| Panthera onca KP202264 2               | Canis lupus familiaris NC002008 1231  | 0,18642054 |
| Panthera uncia KP202269 1              | Canis lupus familiaris NC002008 1231  | 0,18642193 |
| Ursus americanus JX196366 3            | Paradoxurus jerdoni MH464793 1        | 0,18642637 |
| Ursus americanus JX196366 3            | Lynx pardinus NC028319 161            | 0,18642731 |
| Panthera leo NERO 19                   | Bassariscus sumichrasti SRX1099089 1  | 0,186428   |
| Martes flavigula NC012141 3            | Ichneumia albicauda T603 1            | 0,18642886 |
| Prionailurus planiceps KY682741 4      | Cuon alpinus NC013445 3               | 0,18642925 |
| Melursus ursinus NC009970 2            | Canis adustus KT448271 1              | 0,18643099 |
| Mustela kathiah NC023210 1             | Lycalopex sechurae KT448284 1         | 0,18643115 |
| Bdeogale nigripes GLC15 1              | Tapirus terrestris T358               | 0,18643375 |
| Felis nigripes NC028309 1              | Eumetopias jubatus NC004030 10        | 0,18643391 |
| Nasua nasua NC020647 1                 | Lutrogale perspicillata NC035811 1    | 0,18643495 |
| Mustela kathiah NC023210 1             | Helogale parvula SRR7637809 1         | 0,18643852 |
| Vulpes vulpes NC008434 5               | Melogale moschata KP726273 1          | 0,18643907 |
| Martes zibellina NC011579 39           | Galidia elegans D146 1                | 0,18644014 |
| Ursus pardalis NC028315 1              | Conepatus chinga NC042596 1           | 0,18644167 |
| Vulpes vulpes NC008434 5               | Mustela sibirica AP017394 11          | 0,18644284 |
| Procyon lotor AB462046 3               | Urva semitorquata MH464789 1          | 0,18644296 |
| Martes pennanti NC020664 16            | Xenogale naso C07XAR110 1             | 0,18644537 |
| Lutra lutra LC050126 1                 | Ichneumia albicauda T603 1            | 0,18644564 |
| Martes pennanti NC020664 16            | Cynictis penicillata T375 1           | 0,18644589 |
| Ursus thibetanus formosanus NC009333 1 | Canis lupus chanco NC010340 4         | 0,18644667 |
| Viverricula indica KX891751 1          | Martes zibellina NC011579 39          | 0,18644802 |
| Ichneumia albicauda T603 1             | Tapirus terrestris T358               | 0,18644828 |
| Meles leucurus NC039173 4              | Hyaeena hyaena NC020669 1             | 0,18644832 |
| Prionodon pardicolor NC024569 2        | Conepatus chinga NC042596 1           | 0,18644987 |
| Prionodon pardicolor NC024569 2        | Melogale moschata V0735A 1            | 0,18645023 |
| Urva brachyura KY117547 1              | Arctodus simus NC011116 1             | 0,18645073 |

|                                       |                                       |            |
|---------------------------------------|---------------------------------------|------------|
| Mungos mungo MMC7 1                   | Chrotogale owstoni T607 1             | 0,15491693 |
| Homotherium latidens MF871702 3       | Urva javanica T413 1                  | 0,15492646 |
| Panthera onca KP202264 2              | Chrotogale owstoni T607 1             | 0,15493459 |
| Panthera uncia NC010638 1             | Crossarchus platycephalus C7R66 1     | 0,15490898 |
| Panthera onca KP202264 2              | Eupleres goudotii D128 1              | 0,15494047 |
| Taxidea taxus NC020646 1              | Bassariscus sumichrasti SRX1099089 1  | 0,15494402 |
| Prionailurus bengalensis NC028301 12  | Galidia elegans D146 1                | 0,154946   |
| Salanoia concolor D378 1              | Panthera tigris NC010642 35           | 0,15495031 |
| Helogale parvula SRR7637809 1         | Arctictis binturong T605 2            | 0,15495056 |
| Panthera onca NC022842 1              | Galidictis fasciata DM333 1           | 0,15495281 |
| Paradoxurus hermaphroditus NC039591 1 | Urva javanica/auropunctata NC006835 1 | 0,15496697 |
| Ommatophoca rossii AY377287etc 1      | Neophoca cinerea NC008419 1           | 0,15496988 |
| Homotherium latidens MF871702 3       | Helogale parvula SRR7637809 1         | 0,15497735 |
| Diplogale hosei MH464790 1            | Crossarchus platycephalus C7R66 1     | 0,15498111 |
| Parahyaena brunnea NC038159 15        | Genetta abyssinica MG489822 1         | 0,15498441 |
| Mungos mungo MMC7 1                   | Felis nigripes NC028309 1             | 0,15500592 |
| Leopardus tigrinus NC028317 1         | Urva brachyura KY117547 1             | 0,15500675 |
| Urva javanica T413 1                  | Catopuma temminckii NC027115 41       | 0,15500696 |
| Profelis aurata NC028299 1            | Cynictis penicillata T375 1           | 0,15500706 |
| Felis silvestris lybica KP202275 4    | Bdeogale nigripes GLC15 1             | 0,15500708 |
| Leopardus tigrinus NC028317 1         | Ichneumia albicauda T603 1            | 0,15501022 |
| Galidia elegans D146 1                | Caracal caracal NC028306 1            | 0,15501291 |
| Paradoxurus hermaphroditus NLNC 1     | Panthera onca NC022842 1              | 0,15501752 |
| Proteles cristata T393 6              | Cryptoprocta ferox CFC13 1            | 0,15502165 |
| Parahyaena brunnea NC038159 15        | Caracal caracal NC028306 1            | 0,1550238  |
| Lynx canadensis NC028313 1            | Crocuta crocuta NC020670 3            | 0,15502555 |
| Proteles cristata T393 6              | Prionailurus bengalensis CKM45 20     | 0,15503958 |
| Prionodon pardicolor NC024569 2       | Neofelis nebulosa NC008450 3          | 0,15505284 |
| Smilodon populator MF871700 1         | Galidia elegans D146 1                | 0,15507008 |
| Prionailurus planiceps KY682741 4     | Urva brachyura KY117547 1             | 0,15507276 |
| Felis margarita NC028308 1            | Bdeogale nigripes GLC15 1             | 0,15507463 |
| Pardofelis marmorata NLN3 2           | Galerella sanguinea T378 1            | 0,15507485 |
| Urva semitorquata MH464789 1          | Diplogale hosei MH464790 1            | 0,15507518 |
| Puma concolor NC016470 22             | Galerella sanguinea T378 1            | 0,15507534 |
| Paguma larvata PDD511 2               | Mungotictis decemlineata NC027828 1   | 0,15507564 |
| Suricata suricatta SSM10 1            | Parahyaena brunnea NC038159 15        | 0,15507852 |
| Prionailurus bengalensis CKM45 20     | Galidia elegans D146 1                | 0,15508382 |
| Panthera tigris NC010642 35           | Mungotictis decemlineata NC027828 1   | 0,15508455 |
| Proteles cristata T393 6              | Lynx lynx NC027083 4                  | 0,15509307 |
| Proteles cristata T393 6              | Leopardus pardalis NC028315 1         | 0,15509757 |
| Otocolobus manul NC028323 1           | Cynogale bennetti KY117544 1          | 0,15511443 |
| Prionailurus bengalensis CKM45 20     | Cynogale bennetti KY117544 1          | 0,15511775 |
| Xenogale naso C07XAR110 1             | Catopuma temminckii NC027115 41       | 0,15514034 |
| Prionailurus planiceps KY682741 4     | Xenogale naso C07XAR110 1             | 0,15514086 |
| Prionailurus planiceps NC028312 6     | Cynictis penicillata T375 1           | 0,15514088 |
| Felis chaus NC028307 1                | Cynictis penicillata T375 1           | 0,15514113 |
| Helogale parvula SRR7637809 1         | Felis chaus NC028307 1                | 0,15514193 |
| Panthera uncia NC010638 1             | Genetta genetta T297 1                | 0,15514606 |
| Crocuta crocuta NC020670 3            | Atilax paludinosus T606 1             | 0,15514778 |
| Prionailurus viverrinus NC028305 1    | Galidia elegans D146 1                | 0,15515035 |
| Hyena hyaena NC020669 1               | Caracal caracal NC028306 1            | 0,15515131 |
| Suricata suricatta SSM10 1            | Homotherium latidens MF871702 3       | 0,15520225 |
| Paradoxurus jerdoni MH464793 1        | Mungos mungo/gambianus SRR7704821 1   | 0,15520479 |
| Galerella sanguinea T378 1            | Felis chaus NC001700 2                | 0,15520933 |
| Suricata suricatta SSM10 1            | Hyena hyaena NC020669 1               | 0,15521106 |
| Paradoxurus hermaphroditus NLNC 1     | Galidictis fasciata DM333 1           | 0,15521157 |
| Panthera tigris NC010642 35           | Galidictis fasciata DM333 1           | 0,15522012 |
| Urva brachyura KY117547 1             | Acinonyx jubatus NC005212 3           | 0,15522207 |
| Urva brachyura KY117547 1             | Diplogale hosei MH464790 1            | 0,1552238  |
| Urva javanica/auropunctata NC006835 1 | Chrotogale owstoni T607 1             | 0,1552275  |
| Viverricula indica NK891751 1         | Neofelis nebulosa NC008450 3          | 0,15524186 |
| Leopardus jacobita NC028322 1         | Urva javanica/auropunctata NC006835 1 | 0,15524291 |
| Urva brachyura KY117547 1             | Felis margarita NC028308 1            | 0,15527487 |
| Suricata suricatta SSM10 1            | Catopuma temminckii NC027115 41       | 0,15527539 |
| Odobenus rosmarus NC004029 29         | Arctocepalus pusillus NC008417 1      | 0,15527686 |
| Proteles cristata T393 6              | Galerella sanguinea T378 1            | 0,15527868 |
| Panthera tigris NC010642 35           | Paguma larvata PDD511 2               | 0,15528442 |
| Parahyaena brunnea NC038159 15        | Homotherium latidens MF871702 3       | 0,15529053 |
| Paradoxurus jerdoni MH464793 1        | Urva javanica/auropunctata NC006835 1 | 0,15530364 |
| Leopardus wiedii NC028318 1           | Cynogale bennetti KY117544 1          | 0,15531141 |
| Otocolobus manul NC028323 1           | Cynictis penicillata T375 1           | 0,15534395 |
| Panthera onca NC022842 1              | Chrotogale owstoni T607 1             | 0,15534699 |
| Panthera tigris NC010642 35           | Crossarchus platycephalus C7R66 1     | 0,15534978 |
| Lynx lynx NC027083 4                  | Crocuta crocuta NC020670 3            | 0,15536183 |
| Proteles cristata T393 6              | Prionailurus rubiginosus NC028304 2   | 0,15536578 |
| Lynx pardinus NC028319 161            | Urva brachyura KY117547 1             | 0,15540865 |
| Lynx lynx NC027083 4                  | Xenogale naso C07XAR110 1             | 0,15540977 |
| Panthera onca KP202264 2              | Urva semitorquata MH464789 1          | 0,15540993 |
| Felis nigripes NC028309 1             | Cynictis penicillata T375 1           | 0,15540999 |
| Hyena hyaena NC020669 1               | Urva javanica T413 1                  | 0,15541029 |
| Salanoia concolor D378 1              | Panthera onca KP202264 2              | 0,15541607 |
| Paradoxurus jerdoni MH464793 1        | Ichneumia albicauda T603 1            | 0,15542116 |
| Profelis aurata NC028299 1            | Hyena hyaena NC020669 1               | 0,15542184 |
| Urva javanica T413 1                  | Acinonyx jubatus NC005212 3           | 0,15542468 |
| Suricata suricatta SSM10 1            | Acinonyx jubatus NC005212 3           | 0,15542495 |
| Ichneumia albicauda T603 1            | Homotherium latidens MF871702 3       | 0,15544762 |
| Mungos mungo/gambianus SRR7704821 1   | Diplogale hosei MH464790 1            | 0,15546586 |
| Bassariscus sumichrasti SRX1099089 1  | Bassaricyon neblina SRX1097850 1      | 0,15547214 |
| Puma concolor NC016470 22             | Xenogale naso C07XAR110 1             | 0,15547776 |
| Leopardus guigna NC028321 1           | Xenogale naso C07XAR110 1             | 0,15547965 |
| Ichneumia albicauda T603 1            | Felis chaus NC028307 1                | 0,15548038 |
| Leptailurus serval NC028316 1         | Galidia elegans D146 1                | 0,15548538 |
| Nandinia binotata NC024567 1          | Crocuta crocuta NC020670 3            | 0,15548539 |
| Panthera tigris amoyensis NC014770 2  | Atilax paludinosus T606 1             | 0,15548612 |
| Panthera tigris NC010642 35           | Atilax paludinosus T606 1             | 0,15548632 |
| Panthera onca NC022842 1              | Urva semitorquata MH464789 1          | 0,15548688 |
| Leptailurus serval NC028316 1         | Hyena hyaena NC020669 1               | 0,15549061 |
| Otocolobus manul NC028323 1           | Urva javanica/auropunctata NC006835 1 | 0,15551142 |
| Prionodon pardicolor NC024569 2       | Panthera pardus NC010641 5            | 0,15552095 |
| Urva brachyura KY117547 1             | Genetta genetta T297 1                | 0,15553458 |
| Leptailurus serval NC028316 1         | Helogale parvula SRR7637809 1         | 0,15554677 |
| Leopardus tigrinus NC028317 1         | Bdeogale nigripes GLC15 1             | 0,15554745 |
| Proteles cristata T393 6              | Mungos mungo/gambianus SRR7704821 1   | 0,15555184 |

|                                      |                                      |            |
|--------------------------------------|--------------------------------------|------------|
| Mustela sibirica NC020637 6          | Cryptoprocta ferox CFC13 1           | 0,18645087 |
| Galerella sanguinea T378 1           | Arctocepalus gazella BK010918 1      | 0,18645102 |
| Panthera onca KP202264 2             | Melogale moschata V0735A 1           | 0,18645217 |
| Panthera onca KP202264 2             | Lutra sumatrana NC035810 1           | 0,18645222 |
| Tremarctos ornatus NC009969 2        | Ichneumia albicauda T603 1           | 0,18645276 |
| Vulpes lagopus NC026529 3            | Lynx canadensis NC028313 1           | 0,18645294 |
| Galidia elegans D146 1               | Arctodus simus NC011116 1            | 0,18645371 |
| Parahyaena brunnea NC038159 15       | Mustela sibirica NC020637 6          | 0,18645433 |
| Ursus arctos EU497665 29             | Phocarcos hookeri NC008418 1         | 0,18645461 |
| Phocarcos hookeri NC008418 1         | Ictonyx striatus T299 1              | 0,18645526 |
| Pardofelis marmorata NLN3 2          | Nyctereutes procyonoides NC013700 3  | 0,18645577 |
| Neophoca cinerea NC008419 1          | Felis silvestris lybica KP202275 4   | 0,18645608 |
| Ursus arctos pruinosus MG066703 3    | Arctocepalus forsteri KT693377 17    | 0,18645765 |
| Ursus arctos pruinosus MG066703 3    | Bassariscus sumichrasti SRX1099089 1 | 0,18645859 |
| Martes pennanti NC020664 16          | Caracal caracal NC028306 1           | 0,18646009 |
| Otaria byronia OTAB 1                | Civettictis civetta GLC19 1          | 0,18646035 |
| Felis margarita NC028308 1           | Arctotherium sp NC030174 1           | 0,18646049 |
| Otaria byronia OTAB 1                | Genetta servalina NC024568 2         | 0,18646079 |
| Viverricula indica NC025296 2        | Ursus maritimus GU573488 Svalbard    | 0,18646111 |
| Prionailurus rubiginosus NC028304 2  | Otocyon megalotis SAF1 2             | 0,18646166 |
| Panthera leo spelaea KX258452 2      | Arctonyx collaris NC020645 1         | 0,18646175 |
| Procyon lotor AB462049 4             | Catopuma temminckii NC027115 41      | 0,1864621  |
| Ursus thibetanus laniger MH281753 2  | Mungos mungo MMC7 1                  | 0,18646304 |
| Ursus arctos isabellinus 1885 2      | Leopardus pardalis T262 1            | 0,18646398 |
| Ursus arctos EU497665 29             | Leopardus pardalis NC028315 1        | 0,18646425 |
| Profelis aurata NC028299 1           | Neovison vixen NC020641 3            | 0,18646577 |
| Ursus maritimus NC003428 31          | Profelis aurata NC028299 1           | 0,18646605 |
| Ursus maritimus NC003428 31          | Puma yagouaroundi NC028311 1         | 0,18646614 |
| Speothos venaticus C48 2             | Leptailurus serval NC028316 1        | 0,18646763 |
| Zalophus californianus NC008416 1    | Atilax paludinosus T606 1            | 0,1864713  |
| Tremarctos ornatus NC009969 2        | Leopardus colocolo NC028314 1        | 0,18647243 |
| Ursus spelaeus EU327344 13           | Leopardus jacobita NC028322 1        | 0,18647264 |
| Viverra zibetha T609 1               | Galictis vittata T412 1              | 0,18647324 |
| Ursus maritimus NC003428 31          | Arctocepalus forsteri NC04023 28     | 0,18647657 |
| Leptailurus serval NC028316 1        | Helarctos malayanus NC009968 2       | 0,1864803  |
| Ursus arctos GU573486 5              | Ictonyx striatus T299 1              | 0,18648143 |
| Ursus maritimus GU573488 Svalbard    | Leopardus colocolo NC028314 1        | 0,18648331 |
| Eumetopias jubatus NC004030 10       | Atilax paludinosus T606 1            | 0,18648593 |
| Panthera leo NERO 19                 | Mustela putorius NC020638 4          | 0,18648666 |
| Panthera pardus NC010641 5           | Ailurus fulgens styani NC009691 1    | 0,18648712 |
| Poecilogale albinucha T602 1         | Canis lupus chanco NC010340 4        | 0,1864879  |
| Melurus ursinus NC009970 2           | Galictis vittata T412 1              | 0,18648818 |
| Ursus spelaeus NC011112 8            | Galictis vittata T412 1              | 0,18649004 |
| Gulo gulo NC009685 3                 | Canis aureus KT448274 1              | 0,18649542 |
| Phocarcos hookeri NC008418 1         | Civettictis civetta NC033378 1       | 0,18649562 |
| Zalophus wollebaeki SRR4431565 1     | Spilogale putorius NC010497 1        | 0,18649563 |
| Ursus americanus JX196366 3          | Puma yagouaroundi NC028311 1         | 0,18649711 |
| Pusa sibirica NC008432 2             | Cynogale bennetti KY117544 1         | 0,18649839 |
| Lutra lutra NC011358 9               | Bdeogale nigripes GLC15 1            | 0,18649943 |
| Urva brachyura KY117547 1            | Enhydra lutris NC009692 1            | 0,18649949 |
| Mungos mungo MMC7 1                  | Melogale moschata V0735A 1           | 0,18650398 |
| Melogale moschata V0735A 1           | Atilax paludinosus T606 1            | 0,18650429 |
| Nyctereutes procyonoides NC013700 3  | Martes melampus NC009678 1           | 0,18650548 |
| Prionodon linsang ERR2391707 1       | Meles anakuma NC009677 1             | 0,18650676 |
| Martes americana NC020642 1          | Canis anthus NC027956 2              | 0,18650772 |
| Lutra sumatrana NC035810 1           | Canis latrans NC008093 7             | 0,18650797 |
| Nyctereutes procyonoides NC013700 3  | Mungos mungo/gambianus SRR77048      | 0,18650877 |
| Suricata suricatta SSM10 1           | Procyon lotor AB462049 4             | 0,18651032 |
| Vulpes vulpes NC008434 5             | Mustela putorius NC020638 4          | 0,18651043 |
| Xenogale naso C07XAR110 1            | Arctocepalus pusillus NC008417 1     | 0,18651129 |
| Hemigalus derbyanus MH464791 1       | Arctocepalus forsteri NC04023 28     | 0,18651174 |
| Mustela erminea T305 2               | Galidia elegans D146 1               | 0,18651216 |
| Lynx canadensis NC028313 1           | Ailurus fulgens NC011124 1           | 0,18651362 |
| Phoca vitulina NC001325 1            | Tapirus terrestris T358              | 0,18651566 |
| Vulpes vulpes NC008434 5             | Arctodus simus NC011116 1            | 0,18651582 |
| Prionodon linsang ERR2391707 1       | Monachus schauinslandi NC008421 1    | 0,18651775 |
| Mustela altaica NC021751 1           | Canis anthus NC027956 2              | 0,18651819 |
| Martes arctos NC009678 1             | Fossa fossana D350 1                 | 0,18651842 |
| Mustela putorius NC020638 4          | Hyena hyaena NC020669 1              | 0,18651851 |
| Panthera leo NERO 19                 | Canis lupus familiaris NC002008 1231 | 0,18651868 |
| Martes foina NC020643 1              | Urva brachyura KY117547 1            | 0,186519   |
| Panthera uncia NC010638 1            | Lutra sumatrana NC035810 1           | 0,18651946 |
| Leptailurus serval NC028316 1        | Arctocepalus australis MG023139 1    | 0,18651989 |
| Neophoca cinerea NC008419 1          | Genetta servalina NC024568 2         | 0,18651991 |
| Vulpes corsac NC027958 1             | Lynx lynx NC027958 1                 | 0,18651992 |
| Parahyaena brunnea NC038159 15       | Callorhinus ursinus NC008415 1       | 0,1865201  |
| Ictonyx striatus T299 1              | Atilax paludinosus T606 1            | 0,18652019 |
| Catopuma temminckii NC027115 41      | Arctocepalus gazella BK010918 1      | 0,18652053 |
| Vulpes ferrilata NC027935 1          | Puma concolor NC016470 22            | 0,18652076 |
| Martes foina NC020643 1              | Canis anthus NC027956 2              | 0,18652098 |
| Paradoxurus hermaphroditus NLNC 1    | Martes pennanti NC020664 16          | 0,18652114 |
| Viverricula indica NC025296 2        | Neophoca cinerea NC008419 1          | 0,18652399 |
| Odobenus rosmarus NC004029 29        | Ailurus fulgens styani NC009691 1    | 0,18652438 |
| Martes melampus NC009678 1           | Arctictis binturong T605 2           | 0,18652481 |
| Viverra tangalunga MH464792 1        | Ursus arctos pruinosus MG066703 3    | 0,18652543 |
| Panthera leo spelaea KX258452 2      | Ommatophoca rossii AY377287etc 1     | 0,18652549 |
| Meles meles T303 3                   | Chrysocyon brachyurus NC024172 1     | 0,18652715 |
| Panthera pardus NC010641 5           | Canis lupus chanco NC010340 4        | 0,18652792 |
| Prionodon linsang ERR2391707 1       | Chrysocyon brachyurus NC024172 1     | 0,18652824 |
| Viverricula indica NC025296 2        | Ursus maritimus NC003428 31          | 0,18652849 |
| Ursus maritimus NC003428 31          | Paguma larvata PDD511 2              | 0,1865288  |
| Prionailurus bengalensis NC028301 12 | Otocyon megalotis SAF1 2             | 0,1865291  |
| Panthera onca NC022842 1             | Lutra sumatrana NC035810 1           | 0,18653078 |
| Leopardus guigna NC028321 1          | Arctotherium sp NC030174 1           | 0,18653181 |
| Ursus arctos EU497665 29             | Leopardus pardalis T262 1            | 0,18653183 |
| Speothos venaticus C48 2             | Felis silvestris lybica KP202275 4   | 0,18653345 |
| Odobenus rosmarus NC004029 29        | Martes americana NC020642 1          | 0,18653356 |
| Ursus thibetanus formosanus NC0093   | Procyon lotor AB462049 4             | 0,18653427 |
| Martes americana NC020642 1          | Ailuropoda melanoleuca NC009492 5    | 0,18653524 |
| Zalophus wollebaeki SRR4431565 1     | Felis chaus NC028307 1               | 0,18653658 |
| Leopardus colocolo NC028314 1        | Arctocepalus forsteri KT693377 17    | 0,18654045 |
| Helogale parvula SRR7637809 1        | Canis lupus familiaris NC002008 1231 | 0,18654165 |
| Nyctereutes procyonoides NC013700 3  | Urva javanica/auropunctata NC006835  | 0,18654236 |

|                                       |                                       |            |
|---------------------------------------|---------------------------------------|------------|
| Urva semitorquata MH464789 1          | Crocota crocata NC020670 3            | 0,15555264 |
| Otocolobus manul NC028323 1           | Hyaena hyaena NC020669 1              | 0,15555786 |
| Paradoxurus hermaphroditus NLNC 1     | Panthera pardus NC010641 5            | 0,15557683 |
| Profelis aurata NC028299 1            | Cynogale bennetti KY117544 1          | 0,15558484 |
| Lynx pardinus NC028319 161            | Xenogale naso C07XAR110 1             | 0,15561196 |
| Urva javanica T413 1                  | Felis margarita NC028308 1            | 0,15561216 |
| Otocolobus manul NC028323 1           | Urva brachyura KY117547 1             | 0,15561262 |
| Leopardus jacobita NC028322 1         | Urva brachyura KY117547 1             | 0,15561228 |
| Leopardus jacobita NC028322 1         | Bdeogale nigripes GLC15 1             | 0,15561482 |
| Panthera tigris amoyensis NC014770 2  | Crossarchus platycephalus C7R66 1     | 0,15561911 |
| Panthera pardus japonensis KJ866876 8 | Cryptoprocta ferox CFC13 1            | 0,15562236 |
| Ursus arctos pruinosus MG066703 3     | Ailuropoda melanoleuca NC009492 5     | 0,15562434 |
| Pardofelis marmorata NLN3 2           | Parahyaena brunnea NC038159 15        | 0,15562923 |
| Panthera onca NC022842 1              | Cryptoprocta ferox CFC13 1            | 0,15563014 |
| Mungotictis decemlineata NC027828 1   | Arctictis binturong T605 2            | 0,15563072 |
| Proteles cristata T393 6              | Lynx pardinus NC028319 161            | 0,15563229 |
| Panthera onca NC022842 1              | Arctictis binturong T605 2            | 0,15563801 |
| Panthera leo NERO 19                  | Eupleres goudotii D128 1              | 0,15564444 |
| Odobenus rosmarus NC004029 29         | Arctocepalus townsendi NC008420 1     | 0,15567672 |
| Lynx canadensis NC028313 1            | Urva brachyura KY117547 1             | 0,15567731 |
| Urva javanica T413 1                  | Felis catus NC001700 2                | 0,15567906 |
| Puma yagouaroundi NC028311 1          | Bdeogale nigripes GLC15 1             | 0,15568131 |
| Urva javanica T413 1                  | Crocota crocata NC020670 3            | 0,15568648 |
| Otocolobus manul NC028323 1           | Gallidia elegans D146 1               | 0,15568733 |
| Hyaena hyaena NC020669 1              | Catopuma temminckii NC027115 41       | 0,15569074 |
| Atilax paludinosus T606 1             | Arctictis binturong T605 2            | 0,15569115 |
| Panthera leo NERO 19                  | Mungos mungo MMC7 1                   | 0,15569785 |
| Prionailurus bengalensis NC028301 12  | Crocota crocata NC020670 3            | 0,15570231 |
| Lynx canadensis NC028313 1            | Urva javanica/auropunctata NC006835 1 | 0,15571065 |
| Panthera uncia KP202269 1             | Chrotogale owstoni T607 1             | 0,15574287 |
| Odobenus rosmarus NC004029 29         | Neophoca cinerea NC008419 1           | 0,15574618 |
| Suricata suricatta SSM10 1            | Lynx pardinus NC028319 161            | 0,15574682 |
| Mungos mungo/gambianus SRR7704821 1   | Felis nigripes NC028309 1             | 0,15574737 |
| Galerella sanguinea T378 1            | Felis nigripes NC028309 1             | 0,15574884 |
| Panthera tigris amoyensis NC014770 2  | Paguma larvata PDD511 2               | 0,15575559 |
| Salanoia concolor D378 1              | Panthera onca NC022842 1              | 0,15576093 |
| Parahyaena brunnea NC038159 15        | Panthera onca KP202264 2              | 0,15576252 |
| Parahyaena brunnea NC038159 15        | Felis margarita NC028308 1            | 0,15576485 |
| Proteles cristata T393 6              | Lynx canadensis NC028313 1            | 0,15576655 |
| Leopardus pardalis T262 1             | Crocota crocata NC020670 3            | 0,1557717  |
| Homotherium latidens MF871702 3       | Eupleres goudotii D128 1              | 0,15577519 |
| Smilodon populator MF871700 1         | Hyaena hyaena NC020669 1              | 0,15577751 |
| Leopardus tigrinus NC028317 1         | Urva javanica/auropunctata NC006835 1 | 0,15578078 |
| Puma yagouaroundi NC028311 1          | Urva javanica/auropunctata NC006835 1 | 0,15578096 |
| Urva javanica/auropunctata NC006835 1 | Felis margarita NC028308 1            | 0,15578394 |
| Panthera pardus NC010641 5            | Eupleres goudotii D128 1              | 0,1557847  |
| Leopardus geoffroyi NC028320 1        | Cynogale bennetti KY117544 1          | 0,15579583 |
| Otocolobus manul NC028323 1           | Bdeogale nigripes GLC15 1             | 0,15581639 |
| Ichneumia albicauda T603 1            | Felis margarita NC028308 1            | 0,15581667 |
| Prionailurus viverrinus NC028305 1    | Ichneumia albicauda T603 1            | 0,15581875 |
| Pardofelis marmorata NLN3 2           | Gallidia elegans D146 1               | 0,15581989 |
| Panthera uncia NC010638 1             | Mungotictis decemlineata NC027828 1   | 0,15581995 |
| Bdeogale nigripes GLC15 1             | Arctictis binturong T605 2            | 0,15582529 |
| Homotherium latidens MF871702 3       | Cryptoprocta ferox CFC13 1            | 0,15582728 |
| Paguma larvata PDD511 2               | Neofelis nebulosa NC008450 3          | 0,1558494  |
| Urva javanica/auropunctata NC006835 1 | Felis silvestris lybica KP202275 4    | 0,15585111 |
| Nandinia binotata NC024567 1          | Cynogale bennetti KY117544 1          | 0,15586887 |
| Panthera pardus japonensis KJ866876 8 | Helogale parvula SRR7637809 1         | 0,15588158 |
| Hyaena hyaena NC020669 1              | Urva brachyura KY117547 1             | 0,15588202 |
| Leopardus geoffroyi NC028320 1        | Xenogale naso C07XAR110 1             | 0,15588365 |
| Salanoia concolor D378 1              | Paradoxurus hermaphroditus NLNC 1     | 0,15588467 |
| Prionodon linsang ERR2391707 1        | Urva javanica/auropunctata NC006835 1 | 0,15590477 |
| Ommatophoca rossii AY377287etc 1      | Arctocepalus townsendi NC008420 1     | 0,15591522 |
| Ursus americanus JX196366 3           | Ailuropoda melanoleuca NC009492 5     | 0,15591681 |
| Puma concolor NC016470 22             | Cynogale bennetti KY117544 1          | 0,155922   |
| Panthera leo NERO 19                  | Cryptoprocta ferox CFC13 1            | 0,15592676 |
| Eupleres goudotii D128 1              | Chrotogale owstoni T607 1             | 0,15593149 |
| Panthera leo spelaea KX258452 2       | Chrotogale owstoni T607 1             | 0,15594466 |
| Lynx lynx NC027083 4                  | Urva javanica T413 1                  | 0,1559473  |
| Prionailurus planiceps KY682741 4     | Cynictis penicillata T375 1           | 0,15594885 |
| Panthera leo spelaea KX258452 2       | Crossarchus platycephalus C7R66 1     | 0,15595056 |
| Pardofelis marmorata NLN3 2           | Ichneumia albicauda T603 1            | 0,15595111 |
| Panthera tigris amoyensis NC014770 2  | Urva semitorquata MH464789 1          | 0,15595161 |
| Xenogale naso C07XAR110 1             | Acinonyx jubatus NC005212 3           | 0,15596353 |
| Panthera pardus NC010641 5            | Paguma larvata PDD511 2               | 0,15598284 |
| Felis chaus NC028307 1                | Cynogale bennetti KY117544 1          | 0,15598811 |
| Prionailurus rubiginosus NC028304 2   | Cynogale bennetti KY117544 1          | 0,15598963 |
| Prionodon pardicolor NC024569 2       | Panthera leo NERO 19                  | 0,15599027 |
| Puma yagouaroundi NC028311 1          | Xenogale naso C07XAR110 1             | 0,15601623 |
| Pardofelis marmorata NLN3 2           | Bdeogale nigripes GLC15 1             | 0,1560168  |
| Panthera onca KP202264 2              | Gallidia elegans D146 1               | 0,15602152 |
| Smilodon populator MF871700 1         | Xenogale naso C07XAR110 1             | 0,15602323 |
| Panthera onca NC022842 1              | Mungotictis decemlineata NC027828 1   | 0,15602972 |
| Prionailurus planiceps KY682741 4     | Parahyaena brunnea NC038159 15        | 0,1560345  |
| Leopardus pardalis NC028315 1         | Crocota crocata NC020670 3            | 0,15604076 |
| Proteles cristata T393 6              | Leopardus pardalis T262 1             | 0,15604104 |
| Panthera pardus NC010641 5            | Crossarchus platycephalus C7R66 1     | 0,15604949 |
| Urva brachyura KY117547 1             | Felis silvestris lybica KP202275 4    | 0,15608257 |
| Smilodon populator MF871700 1         | Parahyaena brunnea NC038159 15        | 0,1560829  |
| Panthera uncia KP202269 1             | Eupleres goudotii D128 1              | 0,15608537 |
| Panthera onca NC022842 1              | Urva javanica T413 1                  | 0,15609188 |
| Panthera onca KP202264 2              | Cryptoprocta ferox CFC13 1            | 0,15609354 |
| Proteles cristata T393 6              | Prionailurus planiceps NC028312 6     | 0,15610589 |
| Panthera leo NERO 19                  | Mungos mungo/gambianus SRR7704821 1   | 0,1561133  |
| Panthera pardus NC010641 5            | Helogale parvula SRR7637809 1         | 0,15611655 |
| Urva javanica T413 1                  | Chrotogale owstoni T607 1             | 0,15613352 |
| Paradoxurus jerdoni MH464793 1        | Bdeogale nigripes GLC15 1             | 0,15614738 |
| Viverricula indica NC025296 2         | Hyaena hyaena NC020669 1              | 0,15614998 |
| Felis nigripes NC028309 1             | Bdeogale nigripes GLC15 1             | 0,15615176 |
| Panthera tigris amoyensis NC014770 2  | Chrotogale owstoni T607 1             | 0,15615411 |
| Odobenus rosmarus NC004029 29         | Leptonyx chotes weddellii NC008424 1  | 0,1561577  |
| Prionailurus planiceps NC028312 6     | Hyaena hyaena NC020669 1              | 0,15616474 |
| Panthera onca KP202264 2              | Arctictis binturong T605 2            | 0,15616795 |

|                                      |                                      |            |
|--------------------------------------|--------------------------------------|------------|
| Ursus arctos GU573491 207            | Arctictis binturong T605 2           | 0,18654236 |
| Canis lupus familiaris NC002008 1231 | Ailuurus fulgens styani NC009691 1   | 0,18654358 |
| Zalophus wolfebaeki SRR4431565 1     | Panthera tigris amoyensis NC014770 2 | 0,18654406 |
| Ursus spelaeus EU327344 13           | Leopardus guigna NC028321 1          | 0,18654418 |
| Ursus thibetanus formosanus NC0093   | Prionailurus bengalensis NC028301 12 | 0,18654418 |
| Ursus spelaeus NC011112 8            | Felis nigripes NC028309 1            | 0,1865447  |
| Melursus ursinus NC009970 2          | Caracal caracal NC028306 1           | 0,18654825 |
| Melursus ursinus NC009970 2          | Leopardus guigna NC028321 1          | 0,18654945 |
| Panthera leo NERO 19                 | Meles meles T303 3                   | 0,18655042 |
| Mustela eversmannii NC028013 1       | Cuon alpinus NC013445 3              | 0,18655574 |
| Puma concolor NC016470 22            | Gulo gulo NC009685 3                 | 0,18656084 |
| Panthera onca KP202264 2             | Gulo gulo NC009685 3                 | 0,18656307 |
| Lutra lutra NC011358 9               | Urva brachyura KY117547 1            | 0,18656461 |
| Panthera leo spelaea KX258452 2      | Canis lupus familiaris NC002008 1231 | 0,18656792 |
| Martes flavigula NC012141 3          | Hyaena hyaena NC020669 1             | 0,18656848 |
| Mungos mungo/gambianus SRR77048      | Meles anakuma NC009671 1             | 0,18656908 |
| Meles leucurus NC039173 4            | Helogale parvula SRR7637809 1        | 0,18657003 |
| Mustela sibirica NC020637 6          | Mungos mungo/gambianus SRR77048      | 0,18657194 |
| Mustela putorius NC020638 4          | Eupleres goudotii D128 1             | 0,18657205 |
| Martes zibellina NC011579 39         | Chrotogale owstoni T607 1            | 0,18657325 |
| Vulpes lagopus NC026529 3            | Martes melampus NC009678 1           | 0,18657352 |
| Vulpes zerdia KJ603240 1             | Martes melampus NC009678 1           | 0,18657523 |
| Vulpes vulpes NC008434 5             | Mustela sibirica NC020637 6          | 0,18657768 |
| Nyctereutes procyonoides NC013700 3  | Mustela sibirica NC020637 6          | 0,18657848 |
| Neophoca cinerea NC008419 1          | Galidictis fasciata DM333 1          | 0,1865789  |
| Bdeogale nigripes GLC15 1            | Arctocepalus pusillus NC008419 1     | 0,18657926 |
| Martes flavigula NC012141 3          | Ailuropoda melanoleuca NC009492 5    | 0,18658027 |
| Vulpes vulpes NC008434 5             | Taxidea taxus NC020646 1             | 0,18658088 |
| Ursus americanus JX196366 3          | Leopardus colocolo NC028314 1        | 0,18658167 |
| Felis catus NC001700 2               | Conepatus chinga NC042596 1          | 0,18658218 |
| Mustela altaica NC021751 1           | Urva brachyura KY117547 1            | 0,18658261 |
| Conepatus chinga NC042596 1          | Catopuma temminckii NC027115 41      | 0,18658356 |
| Mustela altaica NC021751 1           | Urva semitorquata MH464789 1         | 0,18658394 |
| Galerella sanguinea T378 1           | Arctocepalus forsteri KT693377 17    | 0,18658398 |
| Panthera pardus japonensis KJ866876  | Arctonyx collaris NC020645 1         | 0,18658444 |
| Poecilogale albinucha T602 1         | Mungos mungo MMC7 1                  | 0,18658489 |
| Vulpes zerdia KJ603240 1             | Melogale moschata NC020644 1         | 0,18658496 |
| Meles leucurus NC039173 4            | Canis aureus KT448274 1              | 0,18658514 |
| Panthera onca KP202264 2             | Mustela sibirica NC020637 6          | 0,18658602 |
| Prionailurus planiceps NC028312 6    | Arctocepalus townsendi NC008420 1    | 0,18658683 |
| Ictonyx striatus T299 1              | Xenogale naso C07XAR110 1            | 0,18658808 |
| Leopardus pardalis T262 1            | Arctocepalus townsendi NC008420 1    | 0,18658848 |
| Vulpes lagopus NC026529 3            | Otocolobus manul NC028323 1          | 0,18658857 |
| Vulpes zerdia KJ603240 1             | Puma concolor NC016470 22            | 0,18658872 |
| Parahyaena brunnea NC038159 15       | Bassariscus sumichrasti SRX1099089 1 | 0,18658908 |
| Pardofelis marmorata NLN3 2          | Canis anthus NC027956 2              | 0,18658955 |
| Puma yagouaroundi NC028311 1         | Phocarcus hookeri NC008418 1         | 0,18659122 |
| Vulpes zerdia KJ603240 1             | Leopardus guigna NC028321 1          | 0,18659122 |
| Lynx rufus NC014456 3                | Bassariscus neblina SRX1097850 1     | 0,18659213 |
| Vulpes lagopus NC026529 3            | Panthera tigris NC010642 35          | 0,18659557 |
| Parahyaena brunnea NC038159 15       | Melogale moschata NC020644 1         | 0,18659566 |
| Profelis aurata NC028299 1           | Catopuma temminckii NC027115 41      | 0,18659711 |
| Chrysoyon brachyurus NC024172 1      | Mustela nivalis T306 5               | 0,18659751 |
| Panthera pardus NC010641 5           | Ailuurus fulgens NC011124 1          | 0,18659928 |
| Panthera tigris amoyensis NC014770 2 | Canis lupus familiaris NC002008 1231 | 0,18659931 |
| Ursus maritimus GU573488 Svalbard    | Arctocepalus pusillus NC008417 1     | 0,18660043 |
| Ursus maritimus GU573488 Svalbard    | Profelis aurata NC028299 1           | 0,18660076 |
| Ursus arctos EU497665 29             | Puma yagouaroundi NC028311 1         | 0,18660079 |
| Leopardus jacobita NC028322 1        | Canis aureus KT448274 1              | 0,18660206 |
| Mephitis mephitis NC020648 1         | Martes zibellina NC011579 39         | 0,18660212 |
| Ursus arctos isabellinus 1885 2      | Catopuma badia NC028300 1            | 0,18660361 |
| Ursus thibetanus laniger MH281753 2  | Procyon lotor AB462046 3             | 0,18660428 |
| Panthera tigris amoyensis NC014770 2 | Melogale moschata NC020644 1         | 0,1866044  |
| Mephitis mephitis NC020648 1         | Arctotherium sp NC030174 1           | 0,18660527 |
| Vulpes zerdia KJ603240 1             | Acinonyx jubatus NC005212 3          | 0,18660565 |
| Martes foina NC020643 1              | Ailuropoda melanoleuca NC009492 5    | 0,18660611 |
| Ommatophoca rossii AY377287etc 1     | Neofelis nebulosa NC008450 3         | 0,18660651 |
| Chrysoyon brachyurus NC024172 1      | Bassariscus sumichrasti SRX1099089 1 | 0,18660656 |
| Ursus arctos GU573486 5              | Profelis aurata NC028299 1           | 0,18660694 |
| Viverricula indica KX891745 1        | Melursus ursinus NC009970 2          | 0,18660921 |
| Viverricula indica KX891751 1        | Melursus ursinus NC009970 2          | 0,18660949 |
| Mungotictis decemlineata NC027828    | Canis aureus KT448274 1              | 0,18660967 |
| Lutra sumatrana NC035810 1           | Canis lupus familiaris NC002008 1231 | 0,18660991 |
| Bassariscus neblina SRX1097850 1     | Arctocepalus forsteri NC04023 28     | 0,18661007 |
| Ursus arctos pruinosus MG066703 3    | Galictis vittata T412 1              | 0,18661045 |
| Ursus maritimus NC003428 31          | Galictis zibellina T412 1            | 0,18661049 |
| Lycalopex schuareze KT448284 1       | Gulo gulo NC009685 3                 | 0,18661079 |
| Prionailurus planiceps NC028312 6    | Galictis vittata T412 1              | 0,18661195 |
| Salanoia concolor D378 1             | Canis lupus familiaris NC002008 1231 | 0,18661235 |
| Melursus ursinus NC009970 2          | Lynx pardinus NC028319 161           | 0,18661237 |
| Panthera onca KP202264 2             | Canis lupus chanco NC010340 4        | 0,18661307 |
| Prionodon pardicolor NC024569 2      | Helarctos malayanus NC009968 2       | 0,18661596 |
| Melogale moschata KP726273 1         | Canis lupus chanco NC010340 4        | 0,18661615 |
| Ursus arctos GU573486 5              | Galictis vittata T412 1              | 0,18661651 |
| Panthera leo NERO 19                 | Mustela sibirica AP017394 11         | 0,18662059 |
| Ursus americanus JX196366 3          | Felis margarita NC028308 1           | 0,18663077 |
| Paradoxurus hermaphroditus NC03959   | Haliocercus grypus NC001602 2        | 0,18663082 |
| Genetta genetta T297 1               | Eumetopias jubatus NC004030 10       | 0,18663266 |
| Panthera onca NC022842 1             | Canis lupus familiaris NC002008 1231 | 0,18663493 |
| Cynictis penicillata T375 1          | Tapirus terrestris T358              | 0,18663551 |
| Ursus americanus JX196366 3          | Smilodon populator MF871700 1        | 0,18663624 |
| Xenogale naso C07XAR110 1            | Enhydra lutris NC009692 1            | 0,18663637 |
| Mustela sibirica AP017394 11         | Eupleres goudotii D128 1             | 0,18663915 |
| Mungos mungo MMC7 1                  | Martes americana NC020642 1          | 0,18663958 |
| Viverra tangalunga MH464792 1        | Helogale parvula SRR7637809 1        | 0,18664093 |
| Phocarcus hookeri NC008418 1         | Mungos mungo/gambianus SRR77048      | 0,18664111 |
| Prionailurus planiceps KY682741 4    | Tapirus terrestris T358              | 0,18664142 |
| Urva semitorquata MH464789 1         | Arctocepalus australis MG023139 1    | 0,18664142 |
| Potos flavus T414 1                  | Bdeogale nigripes GLC15 1            | 0,18664227 |
| Vulpes corsac NC023958 1             | Fossa fossana D350 1                 | 0,18664244 |
| Gallidia elegans D146 1              | Enhydra lutris NC009692 1            | 0,18664327 |
| Procyon lotor AB462049 4             | Crossarchus platycephalus C7R66 1    | 0,18664356 |

|                                       |                                       |            |
|---------------------------------------|---------------------------------------|------------|
| Proteles cristata T393 6              | Lynx rufus NCO14456 3                 | 0,15617092 |
| Pardofelis marmorata NLN3 2           | Urva javanica/auropunctata NCO06835 1 | 0,15618205 |
| Panthera leo NERO 19                  | Helogale parvula SRR7637809 1         | 0,15618323 |
| Leopardus colocolo NCO28314 1         | Crocota crocata NCO20670 3            | 0,15619226 |
| Puma yagouaroundi NCO28311 1          | Urva brachyura KY117547 1             | 0,15621823 |
| Pardofelis marmorata NLN3 2           | Xenogale naso CO7XAR110 1             | 0,15621853 |
| Ichneumia albicauda T603 1            | Felis catus NCO01700 2                | 0,15622027 |
| Prionailurus planiceps NCO28312 6     | Ichneumia albicauda T603 1            | 0,15622067 |
| Suricata suricatta SSM10 1            | Leopardus geoffroyi NCO28320 1        | 0,15622069 |
| Panthera tigris NCO10642 35           | Chrotogale owstoni T607 1             | 0,15622136 |
| Parahyaena brunnea NCO38159 15        | Felis silvestris lycbica KP202275 4   | 0,15624288 |
| Lynx lynx NCO27083 4                  | Urva javanica/auropunctata NCO06835 1 | 0,15624925 |
| Paradoxurus hermaphroditus NLNC 1     | Eupleres goudotii D128 1              | 0,15627752 |
| Urva brachyura KY117547 1             | Felis catus NCO01700 2                | 0,15628445 |
| Mungos mungo MMC7 1                   | Felis chaus NCO28307 1                | 0,1562853  |
| Profelis aurata NCO28299 1            | Bdeogale nigripes GLC15 1             | 0,15628745 |
| Xenogale naso CO7XAR110 1             | Arctictis binturong T605 2            | 0,15629677 |
| Hyaena hyaena NCO20669 1              | Felis silvestris lycbica KP202275 4   | 0,15629867 |
| Parahyaena brunnea NCO38159 15        | Otocolobus manu NCO28323 1            | 0,15630446 |
| Puma concolor NCO16470 22             | Proteles cristata T393 6              | 0,15630768 |
| Salanoia concolor D378 1              | Neofelis nebulosa NCO08450 3          | 0,1563177  |
| Paradoxurus hermaphroditus NCO39591 1 | Panthera leo NERO 19                  | 0,15631889 |
| Urva javanica/auropunctata NCO06835 1 | Crocota crocata NCO20670 3            | 0,15632339 |
| Phocarcotus hookeri NCO08418 1        | Ommatophoca rossii AY377287etc 1      | 0,15632834 |
| Urva brachyura KY117547 1             | Chrotogale owstoni T607 1             | 0,15633431 |
| Paradoxurus hermaphroditus NLNC 1     | Helogale parvula SRR7637809 1         | 0,15634951 |
| Suricata suricatta SSM10 1            | Paguma larvata PDD511 2               | 0,15634969 |
| Prionodon linsang ERR2391707 1        | Panthera onca NCO28242 1              | 0,15635842 |
| Panthera onca KP202264 2              | Mungotictis decemlineata NCO27828 1   | 0,15635844 |
| Proteles cristata T393 6              | Xenogale naso CO7XAR110 1             | 0,1563597  |
| Galerella sanguinea T378 1            | Crocota crocata NCO20670 3            | 0,15636197 |
| Odocoileus rosmarus NCO04029 29       | Lobodon carolinophaga NCO08423 1      | 0,15636253 |
| Profelis aurata NCO28299 1            | Parahyaena brunnea NCO38159 15        | 0,156371   |
| Suricata suricatta SSM10 1            | Chrotogale owstoni T607 1             | 0,15640204 |
| Prionodon pardicolor NCO24569 2       | Diplogale hosei MH464790 1            | 0,15641525 |
| Suricata suricatta SSM10 1            | Puma yagouaroundi NCO28311 1          | 0,15642039 |
| Suricata suricatta SSM10 1            | Leptailurus serval NCO28316 1         | 0,15642087 |
| Felis catus NCO01700 2                | Bdeogale nigripes GLC15 1             | 0,15642107 |
| Suricata suricatta SSM10 1            | Leopardus jacobita NCO28322 1         | 0,15642205 |
| Bdeogale nigripes GLC15 1             | Acinonyx jubatus NCO05212 3           | 0,15643589 |
| Proteles cristata T393 6              | Felis nigripes NCO28309 1             | 0,15644184 |
| Proteles cristata T393 6              | Prionailurus planiceps KY682741 4     | 0,15644264 |
| Proteles cristata T393 6              | Leopardus geoffroyi NCO28320 1        | 0,15644355 |
| Nandinia binotata NCO24567 1          | Leptonyx chotes weddellii NCO08424 1  | 0,15647724 |
| Paradoxurus jerdoni MH464793 1        | Xenogale naso CO7XAR110 1             | 0,15648387 |
| Neofelis nebulosa NCO08450 3          | Hemigalpus derbyanus MH464791 1       | 0,15648633 |
| Taxidea taxus NCO20646 1              | Hydrurga leptonyx NCO08425 1          | 0,15648736 |
| Panthera pardus japonensis KJ866876 8 | Crossarchus platycephalus C7R66 1     | 0,15648761 |
| Panthera uncia KP202269 1             | Atilax paludinosus T606 1             | 0,15648843 |
| Prionailurus planiceps KY682741 4     | Ichneumia albicauda T603 1            | 0,15649001 |
| Galidia elegans D146 1                | Felis chaus NCO28307 1                | 0,15649466 |
| Galidictis fasciata DM333 1           | Arctictis binturong T605 2            | 0,15650722 |
| Panthera onca NCO28242 1              | Hyaena hyaena NCO20669 1              | 0,15650879 |
| Panthera pardus NCO10641 5            | Urva semitorquata MH464789 1          | 0,1565208  |
| Cynogale bennetti KY117544 1          | Caracal caracal NCO28306 1            | 0,15652798 |
| Leopardus guigna NCO28321 1           | Cynogale bennetti KY117544 1          | 0,15653679 |
| Prionodon linsang ERR2391707 1        | Panthera onca KP202264 2              | 0,15655184 |
| Prionodon pardicolor NCO24569 2       | Fossa fossana D350 1                  | 0,15655354 |
| Panthera pardus japonensis KJ866876 8 | Mungos mungo/gambianus SRR7704821 1   | 0,15655454 |
| Panthera pardus japonensis KJ866876 8 | Urva semitorquata MH464789 1          | 0,15655507 |
| Viverricula indica KX891751 1         | Cryptoprocta ferox CFC13 1            | 0,15655512 |
| Lynx pardinus NCO28319 161            | Galerella sanguinea T378 1            | 0,15655591 |
| Suricata suricatta SSM10 1            | Leopardus guigna NCO28321 1           | 0,15655735 |
| Proteles cristata T393 6              | Atilax paludinosus T606 1             | 0,15656163 |
| Viverricula indica NCO25296 2         | Parahyaena brunnea NCO38159 15        | 0,15656202 |
| Panthera onca NCO28242 1              | Cynictis penicillata T375 1           | 0,15656327 |
| Paradoxurus hermaphroditus NCO39591 1 | Ichneumia albicauda T603 1            | 0,15656677 |
| Panthera pardus NCO10641 5            | Cryptoprocta ferox CFC13 1            | 0,15660174 |
| Chrotogale owstoni T607 1             | Bdeogale nigripes GLC15 1             | 0,15660489 |
| Prionodon linsang ERR2391707 1        | Chrotogale owstoni T607 1             | 0,15660696 |
| Panthera onca KP202264 2              | Helogale parvula SRR7637809 1         | 0,15662198 |
| Leopardus tigrinus NCO28317 1         | Urva javanica T413 1                  | 0,15662354 |
| Panthera pardus japonensis KJ866876 8 | Eupleres goudotii D128 1              | 0,15662396 |
| Panthera pardus japonensis KJ866876 8 | Paguma larvata PDD511 2               | 0,15662548 |
| Proteles cristata T393 6              | Nandinia binotata NCO24567 1          | 0,15662952 |
| Prionodon pardicolor NCO24569 2       | Panthera leo spelaea KX258452 2       | 0,15663759 |
| Prionodon pardicolor NCO24569 2       | Panthera uncia KP202269 1             | 0,15663925 |
| Proteles cristata T393 6              | Caracal caracal NCO28306 1            | 0,15664259 |
| Paradoxurus jerdoni MH464793 1        | Atilax paludinosus T606 1             | 0,1566859  |
| Urva javanica T413 1                  | Felis nigripes NCO28309 1             | 0,1566893  |
| Leopardus tigrinus NCO28317 1         | Xenogale naso CO7XAR110 1             | 0,15669096 |
| Panthera onca KP202264 2              | Hyaena hyaena NCO20669 1              | 0,15670195 |
| Hyaena hyaena NCO20669 1              | Felis nigripes NCO28309 1             | 0,15670221 |
| Parahyaena brunnea NCO38159 15        | Felis chaus NCO28307 1                | 0,15670717 |
| Lynx pardinus NCO28319 161            | Crocota crocata NCO20670 3            | 0,15670967 |
| Hyaena hyaena NCO20669 1              | Genetta abyssinica MG489822 1         | 0,15673955 |
| Xenogale naso CO7XAR110 1             | Genetta genetta T297 1                | 0,15675536 |
| Xenogale naso CO7XAR110 1             | Felis silvestris lycbica KP202275 4   | 0,15675704 |
| Leopardus geoffroyi NCO28320 1        | Crocota crocata NCO20670 3            | 0,15677947 |
| Hyaena hyaena NCO20669 1              | Acinonyx jubatus NCO05212 3           | 0,15678744 |
| Panthera pardus NCO10641 5            | Atilax paludinosus T606 1             | 0,15679057 |
| Panthera leo NERO 19                  | Atilax paludinosus T606 1             | 0,15679248 |
| Urva javanica/auropunctata NCO06835 1 | Felis catus NCO01700 2                | 0,15679392 |
| Felis margarita NCO28308 1            | Cynogale bennetti KY117544 1          | 0,15679666 |
| Hyaena hyaena NCO20669 1              | Homotherium latidens MF871702 3       | 0,15679966 |
| Panthera onca KP202264 2              | Mungos mungo MMC7 1                   | 0,15682301 |
| Suricata suricatta SSM10 1            | Lynx canadensis NCO28313 1            | 0,15682407 |
| Otocolobus manu NCO28323 1            | Xenogale naso CO7XAR110 1             | 0,15682477 |
| Suricata suricatta SSM10 1            | Otocolobus manu NCO28323 1            | 0,15682495 |
| Suricata suricatta SSM10 1            | Leopardus tigrinus NCO28317 1         | 0,15682602 |
| Ichneumia albicauda T603 1            | Felis nigripes NCO28309 1             | 0,15682659 |
| Salanoia concolor D378 1              | Paradoxurus jerdoni MH464793 1        | 0,1568276  |
| Panthera tigris NCO10642 35           | Urva semitorquata MH464789 1          | 0,15683164 |

|                                       |                                      |            |
|---------------------------------------|--------------------------------------|------------|
| Vulpes vulpes NCO08434 5              | Mustela kathiah NCO23210 1           | 0,18664454 |
| Vulpes ferrillata NCO27935 1          | Mustela putorius NCO20638 4          | 0,18664598 |
| Otaria byronia OTAB 1                 | Genetta abyssinica MG489822 1        | 0,18664621 |
| Bassariscus neblina SRX1097850 1      | Ailurus fulgens styani NCO09691 1    | 0,18664703 |
| Nyctereutes procyonoides NCO13700 3   | Arctocepalus pusillus NCO08417 1     | 0,1866474  |
| Ursus americanus JX196366 3           | Canis aureus KT448274 1              | 0,18664771 |
| Mustela nivalis T306 5                | Arctocepalus australis MG023139 1    | 0,18664911 |
| Genetta genetta T297 1                | Conepatus chinga NCO42596 1          | 0,18664965 |
| Ichneumia albicauda T603 1            | Callorhinus ursinus NCO08415 1       | 0,18665054 |
| Mustela nivalis T306 5                | Urva brachyura KY117547 1            | 0,18665133 |
| Enhydra lutris NCO09692 1             | Cryptoprocta ferox CFC13 1           | 0,18665269 |
| Mustela eversmannii NCO28013 1        | Ichneumia albicauda T603 1           | 0,18665385 |
| Panthera pardus japonensis KJ866876   | Mustela putorius NCO20638 4          | 0,18665388 |
| Phocarcotus hookeri NCO08418 1        | Civettictis civetta GLC19 1          | 0,18665402 |
| Leptailurus serval NCO28316 1         | Arctocepalus townsendi NCO08420 1    | 0,18665418 |
| Caracal caracal NCO28306 1            | Arctocepalus forsteri KT693377 17    | 0,18665461 |
| Viverra zibetha T609 1                | Neophoca cinerea NCO08419 1          | 0,18665498 |
| Leopardus pardalis NCO28315 1         | Arctocepalus townsendi NCO08420 1    | 0,18665554 |
| Ursus arctos EU497665 29              | Chrotogale owstoni T607 1            | 0,18665615 |
| Leopardus jacobita NCO28322 1         | Arctocepalus forsteri KT693377 17    | 0,18665637 |
| Viverra zibetha T609 1                | Otocyon megalotis SAF 2              | 0,18665761 |
| Prionodon pardicolor NCO24569 2       | Canis anthus NCO27956 2              | 0,18665802 |
| Ursus arctos EU497665 29              | Meles anakuma NCO09677 1             | 0,18665805 |
| Ursus arctos pruinosus MG066703 3     | Meles anakuma NCO09677 1             | 0,18665823 |
| Prionailurus rubiginosus NCO28304 2   | Phocarcotus hookeri NCO08418 1       | 0,18665831 |
| Nyctereutes procyonoides NCO13700 3   | Felis chaus NCO28307 1               | 0,18665858 |
| Vulpes ferrillata NCO27935 1          | Leopardus geoffroyi NCO28320 1       | 0,18665893 |
| Procyon lotor AB462049 4              | Genetta genetta T297 1               | 0,18665907 |
| Procyon lotor AB462046 3              | Panthera onca KP202264 2             | 0,1866596  |
| Viverra tangalunga MH464792 1         | Ursus arctos GU573491 207            | 0,18665977 |
| Procyon lotor AB462049 4              | Paradoxurus hermaphroditus NLNC 1    | 0,18665999 |
| Cryptoprocta ferox CFC13 1            | Arctodus simus NCO11116 1            | 0,18666202 |
| Puma yagouaroundi NCO28311 1          | Lutrogale perspicillata NCO35811 1   | 0,18666238 |
| Panthera uncia KP202269 1             | Mustela nivalis T306 5               | 0,18666299 |
| Prionodon pardicolor NCO24569 2       | Bassariscus sumichrasti SRX1099089 1 | 0,18666382 |
| Ursus thibetanus formosanus NCO0933   | Prionodon linsang ERR2391707 1       | 0,1866639  |
| Vulpes corsac NCO23958 1              | Arctictis binturong T605 2           | 0,18666448 |
| Otaria byronia OTAB 1                 | Felis margarita NCO28308 1           | 0,18666449 |
| Parahyaena brunnea NCO38159 15        | Martes pennanti NCO20664 16          | 0,18666498 |
| Ursus arctos isabellinus 1885 3       | Lynx rufus NCO14456 3                | 0,1866653  |
| Ursus americanus JX196366 3           | Lynx rufus NCO10497 1                | 0,18666662 |
| Ursus spelaeus NCO11112 8             | Crossarchus platycephalus C7R66 1    | 0,18666737 |
| Homotherium latidens MF871702 3       | Arctocepalus forsteri NCO04023 28    | 0,1866677  |
| Taxidea taxus NCO20646 1              | Panthera tigris NCO10642 35          | 0,18666804 |
| Smilodon populator MF871700 1         | Melogale moschata V0735A 1           | 0,1866685  |
| Mustela altaica NCO21751 1            | Ailuropoda melanoleuca NCO09492 5    | 0,18666916 |
| Panthera uncia NCO10638 1             | Ichonyx striatus T299 1              | 0,18666951 |
| Poecilogale albinucha T602 1          | Chrysoyon brachyurus NCO24172 1      | 0,18666987 |
| Ursus thibetanus laniger MH281753 2   | Canis latrans NCO08093 7             | 0,18667196 |
| Panthera tigris amoyensis NCO14770 2  | Otocyon megalotis SAF 2              | 0,18667281 |
| Urva javanica/auropunctata NCO06835   | Callorhinus ursinus NCO08415 1       | 0,18667419 |
| Ursus thibetanus formosanus NCO0933   | Ichneumia albicauda T603 1           | 0,1866747  |
| Ursus arctos GU573486 5               | Catopuma badia NCO28300 1            | 0,18667725 |
| Ursus thibetanus formosanus NCO0933   | Profelis aurata NCO28299 1           | 0,18667905 |
| Viverra tangalunga MH464792 1         | Urva javanica/auropunctata NCO06835  | 0,1866806  |
| Martes flavigula NCO12141 3           | Urva brachyura KY117547 1            | 0,18668154 |
| Prionailurus bengalensis NCO28301 12  | Melursus ursinus NCO09970 2          | 0,18668272 |
| Tremarctos ornatus NCO09969 2         | Spilogale putorius NCO10497 1        | 0,18668315 |
| Melursus ursinus NCO09970 2           | Leopardus geoffroyi NCO28320 1       | 0,1866841  |
| Zalophus californianus NCO08416 1     | Panthera onca KP202264 2             | 0,1866843  |
| Ursus thibetanus thibetanus NCO11113  | Lycalopex sechurae KT448284 1        | 0,1866885  |
| Panthera tigris amoyensis NCO14770 2  | Canis lupus chanco NCO10340 4        | 0,18669297 |
| Panthera leo NERO 19                  | Otocyon megalotis SAF 2              | 0,18669331 |
| Procyon lotor AB462046 3              | Panthera leo NERO 19                 | 0,18669578 |
| Panthera pardus NCO10641 5            | Lutra sumatrana NCO35810 1           | 0,18669744 |
| Cuon alpinus NCO13445 3               | Arctonyx collaris NCO20645 1         | 0,18669811 |
| Chrotogale owstoni T607 1             | Arctocepalus townsendi NCO08420 1    | 0,18669952 |
| Lutra lutra LC050126 1                | Urva brachyura KY117547 1            | 0,18670002 |
| Lutra lutra LC011358 9                | Cynictis penicillata T375 1          | 0,18670079 |
| Vulpes zerdia KJ603240 1              | Martes flavigula NCO12141 3          | 0,18670079 |
| Lutra lutra LC050126 1                | Cynictis penicillata T375 1          | 0,18670148 |
| Lutra lutra LC050126 1                | Bdeogale nigripes GLC15 1            | 0,18670204 |
| Genetta servalina NCO24568 2          | Tapirus terrestris T358              | 0,18670267 |
| Lynx lynx NCO27083 4                  | Cuon alpinus NCO13445 3              | 0,1867038  |
| Xenogale naso CO7XAR110 1             | Tapirus terrestris T358              | 0,18670499 |
| Canis mesomelas KT448280 1            | Bdeogale nigripes GLC15 1            | 0,18670543 |
| Panthera onca NCO28242 1              | Gulo gulo NCO09685 3                 | 0,18670826 |
| Urva semitorquata MH464789 1          | Arctocepalus gazella BK010918 1      | 0,18671013 |
| Tremarctos ornatus NCO09969 2         | Lontra canadensis SRR10409165 1      | 0,18671112 |
| Procyon lotor AB462046 3              | Xenogale naso CO7XAR110 1            | 0,18671282 |
| Mustela putorius NCO20638 4           | Mungotictis decemlineata NCO27828 1  | 0,18671283 |
| Pardofelis marmorata NLN3 2           | Lycalopex sechurae KT448284 1        | 0,18671384 |
| Caracal caracal NCO28306 1            | Canis mesomelas KT448280 1           | 0,18671423 |
| Diplogale hosei MH464790 1            | Canis mesomelas KT448280 1           | 0,18671437 |
| Puma yagouaroundi NCO28311 1          | Conepatus chinga NCO42596 1          | 0,18671499 |
| Martes pennanti NCO20664 16           | Bdeogale nigripes GLC15 1            | 0,18671522 |
| Nyctereutes procyonoides NCO13700 3   | Chrotogale owstoni T607 1            | 0,18671522 |
| Nyctereutes procyonoides NCO13700 3   | Martes martes T302 3                 | 0,18671609 |
| Pardofelis marmorata NLN3 2           | Ailurus fulgens styani NCO09691 1    | 0,18671691 |
| Mustela nigripes NCO24942 1           | Galerella sanguinea T378 1           | 0,18671761 |
| Panthera leo NERO 19                  | Canis lupus chanco NCO10340 4        | 0,18671806 |
| Phoca largha NCO08430 1               | Tapirus terrestris T358              | 0,18671811 |
| Vulpes ferrillata NCO27935 1          | Viverra zibetha T609 1               | 0,18671869 |
| Lutra sumatrana NCO35810 1            | Hyaena hyaena NCO20669 1             | 0,18671899 |
| Genetta genetta T297 1                | Arctocepalus australis MG023139 1    | 0,18671907 |
| Helarctos malayanus NCO09968 2        | Canis lupus chanco NCO10340 4        | 0,18671924 |
| Martes americana NCO20642 1           | Genetta genetta T297 1               | 0,1867194  |
| Urocyon littoralis catalinae KP129018 | Homotherium latidens MF871702 3      | 0,1867194  |
| Vulpes zerdia KJ603240 1              | Viverra zibetha T609 1               | 0,18671957 |
| Viverricula indica NCO25296 2         | Arctocepalus gazella BK010918 1      | 0,18671997 |
| Potos flavus T414 1                   | Panthera uncia NCO10638 1            | 0,18672062 |
| Panthera uncia KP202269 1             | Mustela putorius NCO20638 4          | 0,18672064 |
| Panthera uncia NCO10638 1             | Mustela nigripes NCO24942 1          | 0,18672082 |

|                                       |                                       |            |
|---------------------------------------|---------------------------------------|------------|
| Odobenus rosmarus NC004029 29         | Hydrurga leptonyx NC008425 1          | 0,15683436 |
| Pardofelis marmorata NLN3 2           | Hyena hyaena NC020669 1               | 0,1568377  |
| Puma concolor NC016470 22             | Hyena hyaena NC020669 1               | 0,15683791 |
| Viverricula indica XK891745 1         | Parahaena brunnea NC038159 15         | 0,15683935 |
| Parahaena brunnea NC038159 15         | Felis nigripes NC028309 1             | 0,15684167 |
| Prionailurus rubiginosus NC028304 2   | Crocuta crocuta NC020670 3            | 0,15684624 |
| Proteles cristata T393 6              | Prionailurus viverrinus NC028305 1    | 0,15684728 |
| Proteles cristata T393 6              | Leopardus jacobita NC028322 1         | 0,15684947 |
| Prionailurus bengalensis CKM45 20     | Crocuta crocuta NC020670 3            | 0,15684997 |
| Leopardus pardalis NC028315 1         | Cynogale bennetti KY117544 1          | 0,15686309 |
| Paradoxurus hermaphroditus NC039591 1 | Attilax paludinosus T606 1            | 0,15688792 |
| Mustela frenata NC020640 1            | Bassariscus sumichrasti SRX1099089 1  | 0,15688808 |
| Lynx lynx NC027083 4                  | Cynictis penicillata T375 1           | 0,15689008 |
| Leptonyx chotesi NC008424 1           | Arctodus simus NC011116 1             | 0,15689068 |
| Lynx lynx NC027083 4                  | Galerella sanguinea T378 1            | 0,15689181 |
| Suricata suricatta SSM10 1            | Felis chaus NC028307 1                | 0,15689249 |
| Paradoxurus hermaphroditus NLNC 1     | Panthera uncia KP202269 1             | 0,15689398 |
| Panthera uncia KP202269 1             | Cryptoprocta ferox FC13 1             | 0,15690169 |
| Parahaena brunnea NC038159 15         | Felis catus NC001700 2                | 0,15690927 |
| Leopardus wiedii NC028318 1           | Crocuta crocuta NC020670 3            | 0,15691686 |
| Panthera pardus NC010641 5            | Mungos mungo/gambianus SRR7704821 1   | 0,15692456 |
| Taxidea taxus NC020646 1              | Leptonyx chotesi NC008424 1           | 0,1569514  |
| Pardofelis marmorata NLN3 2           | Cynictis penicillata T375 1           | 0,15695852 |
| Hyena hyaena NC020669 1               | Civettictis civetta GLC19 1           | 0,15696761 |
| Suricata suricatta SSM10 1            | Panthera onca NC022842 1              | 0,15696914 |
| Parahaena brunnea NC038159 15         | Civettictis civetta GLC19 1           | 0,15697348 |
| Parahaena brunnea NC038159 15         | Panthera pardus japonensis KJ866876 8 | 0,1569749  |
| Panthera tigris NC010642 35           | Cryptoprocta ferox FC13 1             | 0,15697505 |
| Prionodon pardicolor NC024569 2       | Panthera uncia NC010638 1             | 0,15697569 |
| Neofelis nebulosa NC008450 3          | Crossarchus platycephalus C7R66 1     | 0,15698789 |
| Panthera leo NERO 19                  | Ursa semitorquata MH464789 1          | 0,15699151 |
| Suricata suricatta SSM10 1            | Panthera pardus NC010641 5            | 0,15699327 |
| Paradoxurus hermaphroditus NC039591 1 | Bdeogale nigripes GLC15 1             | 0,15702721 |
| Lynx canadensis NC028313 1            | Cynictis penicillata T375 1           | 0,15702485 |
| Panthera leo spelaea KX258452 2       | Mungos mungo/gambianus SRR7704821 1   | 0,15702686 |
| Galerella sanguinea T378 1            | Felis chaus NC028307 1                | 0,15702826 |
| Suricata suricatta SSM10 1            | Arctictis binturong T605 2            | 0,1570379  |
| Panthera leo NERO 19                  | Ichneumia albicauda T603 1            | 0,15705699 |
| Panthera leo NERO 19                  | Galidia elegans D146 1                | 0,15706559 |
| Prionailurus planiceps NC028312 6     | Cynogale bennetti KY117544 1          | 0,15706679 |
| Paradoxurus jerdoni MH464793 1        | Eupleres goudotii D128 1              | 0,15708539 |
| Viverricula indica XK891745 1         | Hyena hyaena NC020669 1               | 0,15710138 |
| Mungotictis decemlineata NC027828 1   | Diplogale hosei MH464790 1            | 0,15711533 |
| Nandinia binotata NC024567 1          | Hydrurga leptonyx NC008425 1          | 0,15715784 |
| Panthera onca KP202264 1              | Cynictis penicillata T375 1           | 0,15712564 |
| Panthera uncia KP202269 1             | Ursa semitorquata MH464789 1          | 0,15716097 |
| Ursa javanica T413 1                  | Felis chaus NC028307 1                | 0,15716116 |
| Xenogale naso C07XAR110 1             | Felis nigripes NC028309 1             | 0,15716118 |
| Catopuma temminckii NC027115 41       | Bdeogale nigripes GLC15 1             | 0,15716194 |
| Panthera onca NC022842 1              | Mungos mungo MMC7 1                   | 0,15716985 |
| Panthera tigris amoyensis NC014770 2  | Galidia elegans D146 1                | 0,15717195 |
| Crocuta crocuta NC020670 3            | Catopuma badia NC028300 1             | 0,15717994 |
| Proteles cristata T393 6              | Pardofelis marmorata NLN3 2           | 0,15718244 |
| Proteles cristata T393 6              | Felis silvestris lybica KP202275 4    | 0,15718274 |
| Proteles cristata T393 6              | Leopardus guligna NC028321 1          | 0,15718454 |
| Prionailurus planiceps KY682741 4     | Cynogale bennetti KY117544 1          | 0,15720148 |
| Hyena hyaena NC020669 1               | Civettictis civetta NC033378 1        | 0,15720782 |
| Panthera onca KP202264 1              | Diplogale hosei MH464790 1            | 0,15721928 |
| Paradoxurus hermaphroditus NC039591 1 | Mungos mungo/gambianus SRR7704821 1   | 0,15722494 |
| Suricata suricatta SSM10 1            | Genetta genetta T297 1                | 0,15722692 |
| Suricata suricatta SSM10 1            | Caracal caracal NC028306 1            | 0,15722886 |
| Panthera pardus japonensis KJ866876 8 | Attilax paludinosus T606 1            | 0,15722911 |
| Helogale parvula SRR7637809 1         | Chrotogale owstoni T607 1             | 0,15727709 |
| Panthera onca KP202264 2              | Mungos mungo/gambianus SRR7704821 1   | 0,15729497 |
| Suricata suricatta SSM10 1            | Felis silvestris lybica KP202275 4    | 0,15729591 |
| Paradoxurus jerdoni MH464793 1        | Galidictis fasciata DM333 1           | 0,15729922 |
| Crocuta crocuta NC020670 3            | Bdeogale nigripes GLC15 1             | 0,15730457 |
| Panthera tigris amoyensis NC014770 2  | Cryptoprocta ferox FC13 1             | 0,15731171 |
| Odobenus rosmarus NC004029 29         | Mirounga angustirostris SRR10331586 1 | 0,15731248 |
| Parahaena brunnea NC038159 15         | Panthera pardus NC010641 5            | 0,15734805 |
| Paradoxurus jerdoni MH464793 1        | Ursa javanica T413 1                  | 0,15735945 |
| Lynx lynx NC027083 4                  | Ursa brachyura KY117547 1             | 0,15736066 |
| Xenogale naso C07XAR110 1             | Crocuta crocuta NC020670 3            | 0,15737025 |
| Pusa hispida NC 008433 1              | Odobenus rosmarus NC004029 29         | 0,15737383 |
| Prionailurus planiceps KY682741 4     | Hyena hyaena NC020669 1               | 0,15737692 |
| Ursa javanica/auropunctata NC006835 1 | Felis nigripes NC028309 1             | 0,15739523 |
| Homotherium latidens MF871702 3       | Galidia elegans D146 1                | 0,15740049 |
| Prionodon pardicolor NC024569 2       | Cynictis penicillata T375 1           | 0,15742987 |
| Panthera pardus NC010641 5            | Mungos mungo MMC7 1                   | 0,15746242 |
| Prionailurus viverrinus NC028305 1    | Cynogale bennetti KY117544 1          | 0,15746912 |
| Neofelis nebulosa NC008450 3          | Arctictis binturong T605 2            | 0,15747988 |
| Panthera onca KP202264 2              | Ursa javanica T413 1                  | 0,15749627 |
| Lynx canadensis NC028313 1            | Xenogale naso C07XAR110 1             | 0,15749721 |
| Paradoxurus hermaphroditus NC039591 1 | Panthera pardus japonensis KJ866876 8 | 0,15749952 |
| Proteles cristata T393 6              | Bdeogale nigripes GLC15 1             | 0,15750514 |
| Hyena hyaena NC020669 1               | Genetta servalina NC024568 2          | 0,15750568 |
| Hyena hyaena NC020669 1               | Felis margarita NC028308 1            | 0,15751095 |
| Parahaena brunnea NC038159 15         | Genetta servalina NC024568 2          | 0,15751204 |
| Eupleres goudotii D128 1              | Diplogale hosei MH464790 1            | 0,15752086 |
| Phoca largha NC008430 1               | Odobenus rosmarus NC004029 29         | 0,15752263 |
| Homotherium latidens MF871702 3       | Crocuta crocuta NC020670 3            | 0,1575391  |
| Galidictis fasciata DM333 1           | Chrotogale owstoni T607 1             | 0,15755634 |
| Suricata suricatta SSM10 1            | Paradoxurus hermaphroditus NLNC 1     | 0,15756132 |
| Panthera pardus japonensis KJ866876 8 | Mungos mungo MMC7 1                   | 0,15756373 |
| Suricata suricatta SSM10 1            | Panthera onca KP202264 2              | 0,15756565 |
| Panthera leo spelaea KX258452 2       | Eupleres goudotii D128 1              | 0,15756789 |
| Profelis aurata NC028299 1            | Galidia elegans D146 1                | 0,15757231 |
| Panthera onca NC022842 1              | Mungos mungo/gambianus SRR7704821 1   | 0,15757416 |
| Proteles cristata T393 6              | Leopardus wiedii NC028318 1           | 0,15758997 |
| Panthera pardus NC010641 5            | Galerella sanguinea T378 1            | 0,15759857 |
| Proteles cristata T393 6              | Ursa javanica/auropunctata NC006835 1 | 0,15760954 |
| Parahaena brunnea NC038159 15         | Civettictis civetta NC033378 1        | 0,15761803 |
| Panthera leo NERO 19                  | Ursa javanica/auropunctata NC006835 1 | 0,15762636 |

|                                        |                                       |            |
|----------------------------------------|---------------------------------------|------------|
| Profelis aurata NC028299 1             | Mustela nigripes NC024942 1           | 0,18672206 |
| Vulpes zerda KJ603240 1                | Felis nigripes NC028309 1             | 0,18672271 |
| Vulpes lagopus NC026529 3              | Profelis aurata NC028299 1            | 0,18672277 |
| Taxidea taxus NC020646 1               | Galidia elegans D146 1                | 0,18672331 |
| Parahaena brunnea NC038159 15          | Mustela sibirica AP017394 11          | 0,18672377 |
| Lontra canadensis SRR10409165 1        | Leopardus pardalis T262 1             | 0,18672435 |
| Otaria byronia OTAB 1                  | Galerella sanguinea T378 1            | 0,18672483 |
| Urocyon cinereoargenteus NC026723 2    | Homotherium latidens MF871702 3       | 0,18672486 |
| Lontra canadensis SRR10409165 1        | Leptailurus serval NC028316 1         | 0,18672514 |
| Martes melampus NC009678 1             | Ailuropoda melanoleuca NC009492 5     | 0,18672557 |
| Speothos venaticus C48 2               | Mustela nigripes NC024942 1           | 0,18672597 |
| Viverra tangalunga MH464792 1          | Speothos venaticus C48 2              | 0,18672651 |
| Poecilogale albinucha T602 1           | Felis nigripes NC028309 1             | 0,18672881 |
| Panthera pardus japonensis KJ866876 8  | Melogale moschata NC020644 1          | 0,18673041 |
| Lyaon pictus NC028427 2                | Ailuurus fulgens styani NC009691 1    | 0,18673043 |
| Ursus arctos EU497665 29               | Paguma larvata PDD511 2               | 0,18673085 |
| Neophoca cinerea NC008419 1            | Galictis vittata T412 1               | 0,18673208 |
| Ursus arctos isabellinus 1885 2        | Lynx lynx NC027083 4                  | 0,18673226 |
| Ursus maritimus NC003428 31            | Leopardus pardalis T262 1             | 0,18673339 |
| Otaria byronia OTAB 1                  | Leptailurus serval NC028316 1         | 0,18673454 |
| Lontra canadensis SRR10409165 1        | Helarctos malayanus NC009968 2        | 0,18673456 |
| Procyon lotor AB462049 4               | Melursus ursinus NC009970 2           | 0,18673848 |
| Ursus arctos pruinosus MG066703 3      | Leopardus geoffroyi NC028320 1        | 0,18673858 |
| Ursus arctos GU573486 5                | Lynx lynx NC027083 4                  | 0,18673901 |
| Ursus arctos GU573486 5                | Puma yagouaroundi NC028311 1          | 0,18674177 |
| Ursus thibetanus thibetanus NC011112 1 | Otocyon megalotis SAF1 2              | 0,18674234 |
| Ursus spelaeus EU327344 13             | Genetta genetta T297 1                | 0,18674468 |
| Zalophus wolfebaeki SRR4431565 1       | Panthera tigris NC010642 35           | 0,18674615 |
| Ursus thibetanus thibetanus NC011112 1 | Pardofelis marmorata NLN3 2           | 0,18674649 |
| Ursus thibetanus formosanus NC00993 3  | Otocolobus manu NC028323 1            | 0,18674682 |
| Mephitis mephitis NC020648 1           | Genetta genetta T297 1                | 0,18674761 |
| Helarctos malayanus NC009968 2         | Felis chaus NC028307 1                | 0,18674847 |
| Paradoxurus hermaphroditus NC039591 1  | Mephitis mephitis NC020648 1          | 0,18674965 |
| Zalophus californianus NC008416 1      | Profelis aurata NC028299 1            | 0,18675369 |
| Meles meles T303 3                     | Cuon alpinus NC013445 3               | 0,18675637 |
| Viverra tangalunga MH464792 1          | Neofelis nebulosa NC008450 3          | 0,18675804 |
| Melogale moschata NC020644 1           | Canis lupus chanco NC010340 4         | 0,18675867 |
| Panthera pardus japonensis KJ866876 8  | Canis lupus familiaris NC002008 1231  | 0,18675928 |
| Lynx rufus NC014456 3                  | Arctocephalus forsteri NC004023 28    | 0,18676049 |
| Taxidea taxus NC020646 1               | Neofelis nebulosa NC008450 3          | 0,18676145 |
| Speothos venaticus C48 2               | Civettictis civetta NC033378 1        | 0,18676673 |
| Eumetopias jubatus NC004030 10         | Caracal caracal NC028306 1            | 0,18677005 |
| Meles leucurus NC039173 4              | Attilax paludinosus T606 1            | 0,18677245 |
| Helogale parvula SRR7637809 1          | Callorhinus ursinus NC008415 1        | 0,18677323 |
| Mustela nigripes NC024942 1            | Bdeogale nigripes GLC15 1             | 0,18677673 |
| Fossa fossana D350 1                   | Ailuurus fulgens NC011124 1           | 0,18677631 |
| Ursus thibetanus laniger MH281753 2    | Spilogale putorius NC010497 1         | 0,18677901 |
| Smilodon populator MF871700 1          | Arctocephalus townsendi NC008420 1    | 0,18677913 |
| Prionodon pardicolor NC024569 2        | Enhydra lutris NC009692 1             | 0,18677971 |
| Vulpes vulpes NC008434 5               | Chrotogale owstoni T607 1             | 0,18678027 |
| Salanoia concolor D378 1               | Arctocephalus australis MG023139 1    | 0,1867812  |
| Lyaon pictus NC028427 2                | Lutra lutra LC050126 4                | 0,18678147 |
| Nyctereutes procyonoides NC013700 3    | Arctonyx collaris NC020645 1          | 0,18678229 |
| Vulpes corsac NC023958 1               | Taxidea taxus NC020646 1              | 0,18678255 |
| Lynx pardinus NC028319 161             | Ailuurus fulgens NC011124 1           | 0,18678385 |
| Ichneumia albicauda T603 1             | Arctocephalus forsteri KT693377 17    | 0,18678787 |
| Felis silvestris lybica KP202275 4     | Arctocephalus forsteri KT693377 17    | 0,18678883 |
| Puma yagouaroundi NC028311 1           | Arctocephalus townsendi NC008420 1    | 0,18678889 |
| Profelis aurata NC028299 1             | Melogale moschata KP726271 1          | 0,18679009 |
| Vulpes zerda KJ603240 1                | Felis chaus NC028307 1                | 0,18679014 |
| Vulpes vulpes NC008434 5               | Canis latrans NC008093 7              | 0,18679062 |
| Vulpes zerda KJ603240 1                | Profelis aurata NC028299 1            | 0,18679067 |
| Lyaon pictus NC028427 2                | Ursa brachyura KY117547 1             | 0,18679073 |
| Ursus arctos pruinosus MG066703 3      | Smilodon populator MF871700 1         | 0,18679079 |
| Viverra tangalunga MH464792 1          | Parahaena brunnea NC038159 15         | 0,18679179 |
| Galictis vittata T412 1                | Callorhinus ursinus NC008415 1        | 0,18679336 |
| Phocarcos hookeri NC008418 1           | Leopardus guligna NC028321 1          | 0,18679389 |
| Panthera tigris amoyensis NC014770 2   | Meles anakuma NC009677 1              | 0,18679555 |
| Prionodon linsang ERR2391707 1         | Ictonyx striatus T299 1               | 0,18679641 |
| Pardofelis marmorata NLN3 2            | Martes pennanti NC020664 16           | 0,18679656 |
| Leopardus wiedii NC028318 1            | Bassaricyon neblina SRX1097850 1      | 0,18679744 |
| Panthera uncia KP202269 1              | Arctodus simus NC011116 1             | 0,18679793 |
| Lynx lynx NC027083 4                   | Urocyon cinereoargenteus NC026723 2   | 0,18679929 |
| Procyon megalotis SAF1 2               | Felis nigripes NC028309 1             | 0,18679889 |
| Proteles cristata T393 6               | Mustela frenata NC020640 1            | 0,18679941 |
| Ursus maritimus GU573488 Svalbard      | Lynx lynx NC027083 4                  | 0,18680017 |
| Ursus thibetanus mupinensis NC00879 2  | Panthera pardus japonensis KJ866876 8 | 0,18680103 |
| Martes pennanti NC020664 16            | Chrysoyon brachyurus NC024172 1       | 0,18680227 |
| Viverricula indica NC025296 2          | Ursus arctos GU573486 5               | 0,18680444 |
| Lutra lutra NC011358 9                 | Canis lupus familiaris NC002008 1231  | 0,18680491 |
| Procyon lotor AB462049 4               | Melursus ursinus NC009970 2           | 0,18680625 |
| Ursus arctos GU573486 5                | Leopardus pardalis NC028315 1         | 0,18680735 |
| Panthera onca NC022842 1               | Arctodus simus NC011116 1             | 0,18680853 |
| Felis chaus NC028307 1                 | Ailuropoda melanoleuca NC009492 5     | 0,18680872 |
| Otocolobus manu NC028323 1             | Ailuropoda melanoleuca NC009492 5     | 0,18680991 |
| Ursus spelaeus EU327344 13             | Prionailurus viverrinus NC028305 1    | 0,18681005 |
| Ursus spelaeus EU327344 13             | Leptailurus serval NC028316 1         | 0,18681091 |
| Ursus arctos isabellinus 1885 2        | Ictonyx striatus T299 1               | 0,18681149 |
| Ursus spelaeus EU327344 13             | Paradoxurus jerdoni MH464793 1        | 0,18681179 |
| Melursus ursinus NC009970 2            | Lynx rufus NC014456 3                 | 0,18681411 |
| Ursus spelaeus NC011112 8              | Prionailurus planiceps KY682741 4     | 0,18681492 |
| Prionailurus bengalensis CKM45 20      | Galictis vittata T412 1               | 0,18681787 |
| Ursus arctos GU573491 207              | Acinonyx jubatus NC005212 3           | 0,18681787 |
| Otocolobus manu NC028323 1             | Melursus ursinus NC009970 2           | 0,18681794 |
| Lutrogale perspicillata NC035811 1     | Arctocephalus forsteri NC004023 28    | 0,18681841 |
| Genetta servalina NC024568 2           | Arctocephalus forsteri NC004023 28    | 0,18681896 |
| Canis lupus familiaris NC002008 1231   | Bassariscus sumichrasti SRX1099089 1  | 0,18681929 |
| Panthera leo NERO 19                   | Mustela sibirica NC020637 6           | 0,18682288 |
| Vulpes vulpes NC008434 5               | Martes flavigula NC012141 3           | 0,18682611 |
| Spilogale putorius NC010497 1          | Canis latrans NC008093 7              | 0,18682648 |
| Panthera pardus NC010641 5             | Mustela nigripes NC024942 1           | 0,18683013 |
| Viverra tangalunga MH464792 1          | Ursus americanus JX196366 3           | 0,18683243 |
| Spilogale putorius NC010497 1          | Civettictis civetta GLC19 1           | 0,18683344 |

|                                       |                                       |            |
|---------------------------------------|---------------------------------------|------------|
| Urva brachyura KY117547 1             | Catopuma temminckii NC027115 41       | 0,15763241 |
| Panthera uncia NC010638 1             | Urva semitorquata MH464789 1          | 0,15763253 |
| Felis chaus NC028307 1                | Bdeogale nigripes GLC15 1             | 0,15763365 |
| Hyaina hyaena NC020669 1              | Felis catus NC001700 2                | 0,15764491 |
| Panthera onca NC022842 1              | Galidia elegans D146 1                | 0,15764558 |
| Panthera onca NC022842 1              | Urva javanica/auropunctata NC006835 1 | 0,15767279 |
| Proteles cristata T393 6              | Homotherium latidens MF871702 3       | 0,15769476 |
| Taxidea taxus NC020646 1              | Lobodon carcinophaga NC008423 1       | 0,15769886 |
| Lynx canadensis NC028313 1            | Galerella sanguinea T378 1            | 0,15770002 |
| Paradoxurus hermaphroditus NC039591 1 | Panthera onca KP202264 2              | 0,1577016  |
| Paradoxurus jerdoni MH464793 1        | Panthera pardus japonensis KJ866876 8 | 0,15770189 |
| Panthera tigris NC010642 35           | Galidia elegans D146 1                | 0,15771066 |
| Panthera onca KP202264 2              | Urva javanica/auropunctata NC006835 1 | 0,15773001 |
| Paradoxurus hermaphroditus NC039591 1 | Urva brachyura KY117547 1             | 0,15773639 |
| Puma concolor NC016470 22             | Urva brachyura KY117547 1             | 0,15776634 |
| Panthera uncia KP202269 1             | Galidia elegans D146 1                | 0,15772238 |
| Galidia elegans D146 1                | Felis nigripes NC028309 1             | 0,15773739 |
| Ichneumia albicauda T603 1            | Crocota crocata NC020670 3            | 0,15777822 |
| Smilodon populator MF871700 1         | Crocota crocata NC020670 3            | 0,15777883 |
| Hyaina hyaena NC020669 1              | Felis chaus NC028307 1                | 0,15777896 |
| Parahyaena brunnea NC038159 15        | Catopuma temminckii NC027115 41       | 0,15778238 |
| Suricata suricatta SSM10 1            | Smilodon populator MF871700 1         | 0,15778588 |
| Felis nigripes NC028309 1             | Cynogale bennetti KY117544 1          | 0,15780652 |
| Salanoia concolor D378 1              | Chrotogale owstoni T607 1             | 0,15782522 |
| Procyon lotor AB462046 3              | Potos flavus T414 1                   | 0,15782677 |
| Paradoxurus hermaphroditus NC039591 1 | Urva javanica T413 1                  | 0,15783073 |
| Suricata suricatta SSM10 1            | Lynx rufus NC014456 3                 | 0,15783428 |
| Suricata suricatta SSM10 1            | Puma concolor NC016470 22             | 0,15783446 |
| Suricata suricatta SSM10 1            | Felis margarita NC028308 1            | 0,15783484 |
| Panthera pardus japonensis KJ866876 8 | Galidia elegans D146 1                | 0,15784003 |
| Panthera leo spelaea KX258452 2       | Cryptoprocta ferox CFC13 1            | 0,15784353 |
| Proteles cristata T393 6              | Ichneumia albicauda T603 1            | 0,15784389 |
| Pardofelis marmorata NLN3 2           | Crocota crocata NC020670 3            | 0,157855   |
| Paradoxurus jerdoni MH464793 1        | Panthera leo NERO 19                  | 0,15786888 |
| Proteles cristata T393 6              | Leopardus colocolo NC028314 1         | 0,15787376 |
| Panthera leo spelaea KX258452 2       | Mungos mungo MMC7 1                   | 0,1578901  |
| Prionodon linsang ERR2391707 1        | Fossa fossana D350 1                  | 0,1578912  |
| Suricata suricatta SSM10 1            | Panthera pardus japonensis KJ866876 8 | 0,15790272 |
| Paradoxurus hermaphroditus NLNC 1     | Panthera leo spelaea KX258452 2       | 0,15790404 |
| Panthera tigris amoyensis NC014770 2  | Mungos mungo/gambianus SRR7704821 1   | 0,1579085  |
| Paradoxurus hermaphroditus NLNC 1     | Panthera tigris NC010642 35           | 0,15791009 |
| Suricata suricatta SSM10 1            | Crocota crocata NC020670 3            | 0,15791005 |
| Paradoxurus hermaphroditus NC039591 1 | Galerella sanguinea T378 1            | 0,15791158 |
| Paradoxurus jerdoni MH464793 1        | Urva brachyura KY117547 1             | 0,1579657  |
| Panthera leo spelaea KX258452 2       | Urva semitorquata MH464789 1          | 0,15796705 |
| Pardofelis marmorata NLN3 2           | Urva brachyura KY117547 1             | 0,15796773 |
| Panthera uncia KP202269 1             | Mungos mungo MMC7 1                   | 0,1579679  |
| Urva brachyura KY117547 1             | Felis chaus NC028307 1                | 0,1579686  |
| Xenogale naso C07XAR110 1             | Felis margarita NC028308 1            | 0,1579693  |
| Paradoxurus hermaphroditus NLNC 1     | Mungotictis decemlineata NC027828 1   | 0,1579717  |
| Paradoxurus hermaphroditus NC039591 1 | Galidictis fasciata DM333 1           | 0,1579728  |
| Panthera tigris NC010642 35           | Mungos mungo/gambianus SRR7704821 1   | 0,15797572 |
| Odobenus rosmarus NC004029 29         | Erigathus barbatus NC008426 1         | 0,15797828 |
| Panthera onca NC022842 1              | Helogale parvula SRR7637809 1         | 0,15797928 |
| Panthera leo NERO 19                  | Diplogale hosei MH464790 1            | 0,15799117 |
| Prionodon linsang ERR2391707 1        | Panthera leo NERO 19                  | 0,15799341 |
| Phoca vitulina NC001325 1             | Odobenus rosmarus NC004029 29         | 0,15799379 |
| Urva javanica/auropunctata NC006835 1 | Felis chaus NC028307 1                | 0,15800239 |
| Lynx pardinus NC028319 161            | Cynogale bennetti KY117544 1          | 0,1580088  |
| Cynogale bennetti KY117544 1          | Catopuma temminckii NC027115 41       | 0,15801765 |
| Paradoxurus hermaphroditus NC039591 1 | Crossarchus platycephalus C7R66 1     | 0,15803294 |
| Pardofelis marmorata NLN3 2           | Urva javanica T413 1                  | 0,15803576 |
| Panthera uncia KP202269 1             | Paguma larvata PDD511 2               | 0,15803939 |
| Panthera leo spelaea KX258452 2       | Paguma larvata PDD511 2               | 0,15804033 |
| Proteles cristata T393 6              | Cynictis penicillata T375 1           | 0,15804408 |
| Galidictis fasciata DM333 1           | Diplogale hosei MH464790 1            | 0,15804611 |
| Leopardus guigna NC028321 1           | Crocota crocata NC020670 3            | 0,15805875 |
| Panthera tigris amoyensis NC014770 2  | Arctictis binturong T605 2            | 0,15805918 |
| Mungotictis decemlineata NC027828 1   | Chrotogale owstoni T607 1             | 0,15809517 |
| Prionodon linsang ERR2391707 1        | Panthera uncia KP202269 1             | 0,1581005  |
| Panthera tigris amoyensis NC014770 2  | Mungos mungo MMC7 1                   | 0,15811032 |
| Paradoxurus hermaphroditus NLNC 1     | Panthera tigris amoyensis NC014770 2  | 0,15811169 |
| Panthera onca NC022842 1              | Bdeogale nigripes GLC15 1             | 0,15811315 |
| Panthera leo spelaea KX258452 2       | Urva javanica/auropunctata NC006835 1 | 0,15813482 |
| Panthera pardus NC010641 5            | Galidia elegans D146 1                | 0,158145   |
| Suricata suricatta SSM10 1            | Felis nigripes NC028309 1             | 0,15817147 |
| Proteles cristata T393 6              | Urva javanica T413 1                  | 0,15817864 |
| Proteles cristata T393 6              | Catopuma temminckii NC027115 41       | 0,15819089 |
| Panthera leo NERO 19                  | Cynictis penicillata T375 1           | 0,15820082 |
| Suricata suricatta SSM10 1            | Panthera leo NERO 19                  | 0,15820552 |
| Panthera leo spelaea KX258452 2       | Helogale parvula SRR7637809 1         | 0,15823677 |
| Xenogale naso C07XAR110 1             | Felis catus NC001700 2                | 0,15823847 |
| Paradoxurus hermaphroditus NLNC 1     | Panthera uncia NC010638 1             | 0,15824062 |
| Panthera pardus japonensis KJ866876 8 | Hyaina hyaena NC020669 1              | 0,1582507  |
| Phoca fasciata NC008428 1             | Odobenus rosmarus NC004029 29         | 0,15825252 |
| Paradoxurus hermaphroditus NC039591 1 | Xenogale naso C07XAR110 1             | 0,15830182 |
| Panthera leo spelaea KX258452 2       | Galidia elegans D146 1                | 0,15830635 |
| Proteles cristata T393 6              | Galidia elegans D146 1                | 0,1583098  |
| Proteles cristata T393 6              | Felis margarita NC028308 1            | 0,15832807 |
| Neofelis nebulosa NC008450 3          | Eupleres goudotii D128 1              | 0,15833384 |
| Panthera pardus japonensis KJ866876 8 | Galerella sanguinea T378 1            | 0,15837382 |
| Urva brachyura KY117547 1             | Crocota crocata NC020670 3            | 0,15838119 |
| Eupleres goudotii D128 1              | Arctictis binturong T605 2            | 0,15838142 |
| Cynictis penicillata T375 1           | Crocota crocata NC020670 3            | 0,15838298 |
| Panthera onca NC022842 1              | Ichneumia albicauda T603 1            | 0,15838397 |
| Proteles cristata T393 6              | Leptailurus serval NC028316 1         | 0,15839372 |
| Panthera leo NERO 19                  | Bdeogale nigripes GLC15 1             | 0,15840387 |
| Paradoxurus jerdoni MH464793 1        | Panthera pardus NC010641 5            | 0,15840454 |
| Panthera pardus NC010641 5            | Hyaina hyaena NC020669 1              | 0,15842129 |
| Procyon lotor AB462049 4              | Potos flavus T414 1                   | 0,15843268 |
| Mustela erminea T305 2                | Hydrurga leptonyx NC008425 1          | 0,158437   |
| Panthera onca NC022842 1              | Xenogale naso C07XAR110 1             | 0,15845029 |
| Panthera uncia KP202269 1             | Arctictis binturong T605 2            | 0,15845761 |

|                                       |                                      |            |
|---------------------------------------|--------------------------------------|------------|
| Pusa caspica NC008431 1               | Cynogale bennetti KY117544 1         | 0,18683532 |
| Mustela sibirica NC020637 6           | Lycalopex schuhræi KT448284 1        | 0,18683612 |
| Meles anakuma NC009677 1              | Attilax paludinosus T606 1           | 0,18684039 |
| Mustela eversmannii NC028013 1        | Xenogale naso C07XAR110 1            | 0,18684268 |
| Mustela eversmannii NC028013 1        | Urva javanica T413 1                 | 0,18684298 |
| Phocarcctos hookeri NC008418 1        | Eupleres goudotii D128 1             | 0,18684304 |
| Urva semitorquata MH464789 1          | Arctocepalus forsteri KT693377 17    | 0,18684351 |
| Genetta abyssinica MG489822 1         | Arctocepalus gazella BK010918 1      | 0,18684357 |
| Paradoxurus hermaphroditus NC039591 1 | Callorhinus ursinus NC008415 1       | 0,18684408 |
| Otocyon megalotis SAF 1 2             | Genetta abyssinica MG489822 1        | 0,18684511 |
| Paguma larvata PDD511 2               | Martes melampus NC009678 1           | 0,18684614 |
| Felis nigripes NC028309 1             | Tapirus terrestris T358              | 0,18684688 |
| Vulpes corsac NC023958 1              | Mustela sibirica NC020637 6          | 0,1868473  |
| Meles anakuma NC009677 1              | Canis anthus NC027956 2              | 0,18684882 |
| Viverra tangalunga MH464792 1         | Nyctereutes procyonoides NC013700 3  | 0,18684913 |
| Salanoia concolor D378 1              | Arctocepalus gazella BK010918 1      | 0,18684959 |
| Vulpes corsac NC023958 1              | Paradoxurus jerdoni MH464793 1       | 0,18685283 |
| Felis catus NC001700 2                | Arctocepalus australis MGO23139 1    | 0,18685611 |
| Salanoia concolor D378 1              | Otocyon megalotis SAF 1 2            | 0,18685652 |
| Vulpes vulpes NC008434 5              | Martes foina NC020643 1              | 0,18685684 |
| Vulpes ferrillata NC027935 1          | Felis catus NC001700 2               | 0,18685688 |
| Vulpes corsac NC023958 1              | Leopardus tigrinus NC028317 1        | 0,18685694 |
| Viverricula indica KX891751 1         | Martes pennanti NC020664 16          | 0,186857   |
| Panthera onca KP202264 2              | Lycalopex schuhræi KT448284 1        | 0,18685707 |
| Profelis aurata NC028299 1            | Melogale moschata V0735A 1           | 0,18685746 |
| Leptailurus serval NC028316 1         | Arctocepalus gazella BK010918 1      | 0,18685758 |
| Lontra canadensis SRR10409165 1       | Lontra canadensis SRR10409165 1      | 0,18685836 |
| Zalophus wolfebaeki SRR4431565 1      | Lontra canadensis SRR10409165 1      | 0,18685849 |
| Melogale moschata V0735A 1            | Chrysocyon brachyurus NC024172 1     | 0,18686011 |
| Phocarcctos hookeri NC008418 1        | Otocolobus manul NC028323 1          | 0,18686111 |
| Panthera tigris NC010642 35           | Lutra lutra LC050126 1               | 0,18686187 |
| Ursus arctos GU573486 5               | Crossarchus platycephalus C7R66 1    | 0,18686211 |
| Lycyon pictus NC028427 2              | Chrotogale owstoni T607 1            | 0,1868622  |
| Mustela altaica NC021751 1            | Genetta genetta T297 1               | 0,18686293 |
| Profelis aurata NC028299 1            | Mustela altaica NC021751 1           | 0,18686308 |
| Ursus thibetanus mupinensis NC00875   | Cryptoprocta ferox CFC13 1           | 0,18686339 |
| Zalophus wolfebaeki SRR4431565 1      | Paradoxurus hermaphroditus NLNC 1    | 0,18686518 |
| Otaria byronia OTAB 1                 | Felis silvestris lybica KP202275 4   | 0,18686559 |
| Lycalopex schuhræi KT448284 1         | Fossa fossana D350 1                 | 0,18686596 |
| Otocyon megalotis SAF 1 2             | Felis chaus NC028307 1               | 0,18686602 |
| Potos flavus T414 1                   | Panthera onca NC022842 1             | 0,18686668 |
| Vulpes lagopus NC026529 3             | Panthera onca NC022842 1             | 0,18686697 |
| Neophoca cinerea NC008419 1           | Hemigalus derbyanus MH464791 1       | 0,18686788 |
| Ursus spelaeus EU327344 13            | Lutrogale perspicillata NC035811 1   | 0,18686816 |
| Ursus arctos isabellinus 1885 2       | Prionailurus planiceps KY682741 4    | 0,18686849 |
| Ursus arctos EU497665 29              | Leopardus wiedii NC028318 1          | 0,18686867 |
| Speothos venaticus C48 2              | Lynx rufus NC014456 3                | 0,1868691  |
| Ursus thibetanus mupinensis NC00875   | Prionodon pardicolor NC024569 2      | 0,1868698  |
| Ursus arctos pruinosus MGO66703 3     | Martes foina NC020643 1              | 0,18687019 |
| Otaria byronia OTAB 1                 | Galictis vittata T412 1              | 0,18687081 |
| Ursus spelaeus EU327344 13            | Lontra canadensis SRR10409165 1      | 0,18687244 |
| Ursus thibetanus laniger MH281753 2   | Canis anthus NC027956 2              | 0,18687378 |
| Genetta abyssinica MG489822 1         | Arctocepalus forsteri NC004023 28    | 0,18687384 |
| Zalophus californianus NC008416 1     | Cynictis penicillata T375 1          | 0,18687604 |
| Prionailurus bengalensis NC028301 12  | Ailuropoda melanoleuca NC009492 5    | 0,18687631 |
| Ursus arctos GU573491 207             | Ictonyx striatus T299 1              | 0,18687882 |
| Ursus maritimus GU573488 Svalbard     | Arctictis binturong T605 2           | 0,18687904 |
| Poecilogale albinucha T602 1          | Ailuropoda melanoleuca NC009492 5    | 0,18687987 |
| Ursus arctos EU497665 29              | Galictis vittata T412 1              | 0,18687995 |
| Ursus thibetanus laniger MH281753 2   | Prionodon pardicolor NC024569 2      | 0,1868808  |
| Mungos mungo MMC7 1                   | Gulo gulo NC009685 3                 | 0,18688087 |
| Pardofelis marmorata NLN3 2           | Chrysocyon brachyurus NC024172 1     | 0,18688194 |
| Urva brachyura KY117547 1             | Gulo gulo NC009685 3                 | 0,18688266 |
| Ursus thibetanus laniger MH281753 2   | Profelis aurata NC028299 1           | 0,18688343 |
| Leopardus jacobita NC028322 1         | Canis lupus chanco NC010340 4        | 0,18688485 |
| Mephitis mephitis NC020648 1          | Diplogale hosei MH464790 1           | 0,18688503 |
| Ictonyx striatus T299 1               | Chrysocyon brachyurus NC024172 1     | 0,18688662 |
| Zalophus californianus NC008416 1     | Ichneumia albicauda T603 1           | 0,18688846 |
| Martes pennanti NC020664 16           | Canis aureus KT448274 1              | 0,18688938 |
| Mungotictis decemlineata NC027828 1   | Eumetopias jubatus NC004030 10       | 0,18689412 |
| Galidia elegans D146 1                | Eumetopias jubatus NC004030 10       | 0,18689516 |
| Mungotictis decemlineata NC027828 1   | Martes flavigula NC012143 3          | 0,18689717 |
| Ursus americanus JX196366 3           | Lynx lynx NC027083 4                 | 0,18689719 |
| Ursus arctos AP012576 6               | Arctocepalus forsteri NC004023 28    | 0,18689951 |
| Ursus americanus JX196366 3           | Prionailurus viverrinus NC028305 1   | 0,18690044 |
| Felis margarita NC028308 1            | Cuon alpinus NC013445 3              | 0,18690066 |
| Felis chaus NC028307 1                | Cuon alpinus NC013445 3              | 0,18690126 |
| Profelis aurata NC028299 1            | Cuon alpinus NC013445 3              | 0,1869022  |
| Conepatus chinga NC042596 1           | Arctotherium sp NC030174 1           | 0,18690263 |
| Lutra lutra LC050126 1                | Arctictis binturong T605 2           | 0,18690625 |
| Gulo gulo NC009685 3                  | Canis lupus chanco NC010340 4        | 0,18690906 |
| Ursus arctos isabellinus 1885 2       | Canis lupus chanco NC010340 4        | 0,18691032 |
| Vulpes lagopus NC026529 3             | Martes zibellina NC011579 39         | 0,1869133  |
| Martes martes T302 3                  | Urva brachyura KY117547 1            | 0,18691349 |
| Nyctereutes procyonoides NC013700 3   | Urva javanica T413 1                 | 0,18691504 |
| Suricata suricatta SSM10 1            | Arctocepalus jubatus NC008417 1      | 0,18691522 |
| Salanoia concolor D378 1              | Neophoca cinerea NC008419 1          | 0,1869155  |
| Vulpes zerdia KJ603240 1              | Galidictis fasciata DM333 1          | 0,18691579 |
| Vulpes ferrillata NC027935 1          | Mustela kathiah NC023210 1           | 0,18691579 |
| Salanoia concolor D378 1              | Canis anthus NC027956 2              | 0,18691584 |
| Bdeogale nigripes GLC15 1             | Bassariscus sumichrasti SRR1090989 1 | 0,18691652 |
| Zalophus californianus NC008416 1     | Spilogale putorius NC010497 1        | 0,18691732 |
| Prionodon linsang ERR2391707 1        | Mustela altaica NC021751 1           | 0,18691774 |
| Ursus thibetanus mupinensis NC00875   | Conepatus chinga NC042596 1          | 0,18691812 |
| Viverricula indica KX891745 1         | Arctocepalus gazella BK010918 1      | 0,18691956 |
| Martes americana NC020642 1           | Cryptoprocta ferox CFC13 1           | 0,18691979 |
| Lutrogale perspicillata NC035811 1    | Leopardus pardalis NC028315 1        | 0,18692069 |
| Meles anakuma NC009677 1              | Ichneumia albicauda T603 1           | 0,18692115 |
| Ommatophoca rossii AY377287etc 1      | Chrysocyon brachyurus NC024172 1     | 0,18692192 |
| Otaria byronia OTAB 1                 | Cryptoprocta ferox CFC13 1           | 0,18692288 |
| Lycyon pictus NC028427 2              | Attilax paludinosus T606 1           | 0,18692333 |
| Vulpes vulpes NC008434 5              | Mustela nivalis T306 5               | 0,18692364 |
| Vulpes lagopus NC026529 3             | Panthera onca KP202264 2             | 0,18692364 |

|                                       |                                       |            |
|---------------------------------------|---------------------------------------|------------|
| Panthera tigris NC010642 35           | Arctictis binturong T605 2            | 0,15846328 |
| Proteles cristata T393 6              | Leopardus tigrinus NC028317 1         | 0,158466   |
| Mustela erminea T305 2                | Bassariscus sumichrasti SRX1099089 1  | 0,15850273 |
| Hyaina hyaena NC020669 1              | Hemigalus derbyanus MH464791 1        | 0,15850614 |
| Urva brachyura KY117547 1             | Felis nigripes NC028309 1             | 0,15850674 |
| Panthera uncia KP202269 1             | Helogale parvula SRR7637809 1         | 0,15850773 |
| Hydrurga leptonyx NC008425 1          | Arctodus simus NC011116 1             | 0,15851952 |
| Neofelis nebulosa NC008450 3          | Mungotictis decemlineata NC027828 1   | 0,15853965 |
| Salanoia concolor D378 1              | Diplogale hosei MH464790 1            | 0,15855727 |
| Panthera onca NC022842 1              | Diplogale hosei MH464790 1            | 0,15857254 |
| Panthera uncia NC010638 1             | Eupleres goudotii D128 1              | 0,15857702 |
| Paradoxurus jerdoni MH464793 1        | Panthera onca KP202264 2              | 0,15857714 |
| Viverra zibetha T609 1                | Hyaina hyaena NC020669 1              | 0,15858325 |
| Paradoxurus hermaphroditus NC039591 1 | Panthera onca NC022842 1              | 0,15858607 |
| Odobenus rosmarus NC004029 29         | Monachus schauinslandi NC008421 1     | 0,15859479 |
| Puma yagouaroundi NC028311 1          | Crocota crocata NC020670 3            | 0,15859793 |
| Panthera pardus NC010641 5            | Xenogale naso CD7XAR110 1             | 0,15860915 |
| Panthera uncia NC010638 1             | Chrotogale owstoni T607 1             | 0,15863746 |
| Mustela frenata NC020640 1            | Lobodon carolinophaga NC008423 1      | 0,15863867 |
| Prionodon pardicolor NC024569 2       | Mungos mungo MMC7 1                   | 0,15864062 |
| Suricata suricatta SSM10 1            | Profelis aurata NC028299 1            | 0,15864314 |
| Hemigalus derbyanus MH464791 1        | Galidia elegans D146 1                | 0,15864584 |
| Panthera uncia NC010638 1             | Galidia elegans D146 1                | 0,15864789 |
| Otocolobus manu NC028323 1            | Crocota crocata NC020670 3            | 0,15866527 |
| Felis silvestris lybica KP202275 4    | Cynogale bennetti KY117544 1          | 0,15868264 |
| Prionodon linsang ERR2391707 1        | Urva javanica T413 1                  | 0,15869917 |
| Paradoxurus jerdoni MH464793 1        | Helogale parvula SRR7637809 1         | 0,15870614 |
| Panthera onca KP202264 2              | Bdeogale nigripes GLC15 1             | 0,15870945 |
| Panthera uncia NC010638 1             | Attilax paludinosus T606 1            | 0,1587106  |
| Smilodon populator MF871700 1         | Proteles cristata T393 6              | 0,15873089 |
| Leopardus tigrinus NC028317 1         | Crocota crocata NC020670 3            | 0,15873514 |
| Procyon lotor AB462046 3              | Bassaricyon neblina SRX1097850 1      | 0,15877327 |
| Panthera uncia KP202269 1             | Mungos mungo/gambianus SRR7704821 1   | 0,15877657 |
| Galidia elegans D146 1                | Arctictis binturong T605 2            | 0,1587954  |
| Proteles cristata T393 6              | Catopuma badia NC028300 1             | 0,15879779 |
| Neofelis nebulosa NC008450 3          | Galidictis fasciata DM333 1           | 0,15880951 |
| Panthera leo NERO 19                  | Galerella sanguinea T378 1            | 0,15881003 |
| Parahyaena brunnea NC038159 15        | Panthera leo NERO 19                  | 0,15882784 |
| Prionodon linsang ERR2391707 1        | Mungos mungo/gambianus SRR7704821 1   | 0,15883383 |
| Galidia elegans D146 1                | Chrotogale owstoni T607 1             | 0,15883704 |
| Xenogale naso CD7XAR110 1             | Felis chaus NC028307 1                | 0,15884495 |
| Paradoxurus hermaphroditus NLNC 1     | Galidia elegans D146 1                | 0,15884693 |
| Panthera tigris amoyensis NC014770 2  | Eupleres goudotii D128 1              | 0,15885267 |
| Prionodon pardicolor NC024569 2       | Panthera tigris amoyensis NC014770 2  | 0,15886274 |
| Panthera leo NERO 19                  | Urva javanica T413 1                  | 0,15887415 |
| Suricata suricatta SSM10 1            | Felis chaus NC001700 2                | 0,15891199 |
| Paradoxurus jerdoni MH464793 1        | Mungotictis decemlineata NC027828 1   | 0,1589146  |
| Panthera onca NC022842 1              | Galerella sanguinea T378 1            | 0,1589216  |
| Lynx rufus NC014456 3                 | Crocota crocata NC020670 3            | 0,1589323  |
| Paradoxurus hermaphroditus NLNC 1     | Neofelis nebulosa NC008450 3          | 0,15894762 |
| Prionodon pardicolor NC024569 2       | Mungos mungo/gambianus SRR7704821 1   | 0,15897812 |
| Prionailurus planiceps KY682741 4     | Crocota crocata NC020670 3            | 0,15900075 |
| Paradoxurus hermaphroditus NC039591 1 | Panthera pardus NC010641 5            | 0,1590109  |
| Panthera pardus japonensis KJ866876 8 | Diplogale hosei MH464790 1            | 0,15902187 |
| Prionodon linsang ERR2391707 1        | Ichneumia albicauda T603 1            | 0,15903582 |
| Suricata suricatta SSM10 1            | Paradoxurus jerdoni MH464793 1        | 0,15904266 |
| Panthera onca KP202264 2              | Galerella sanguinea T378 1            | 0,15904681 |
| Panthera tigris amoyensis NC014770 2  | Diplogale hosei MH464790 1            | 0,15904732 |
| Panthera leo spelaea KX258452 2       | Urva javanica T413 1                  | 0,15904784 |
| Panthera leo spelaea KX258452 2       | Attilax paludinosus T606 1            | 0,15905136 |
| Panthera onca NC022842 1              | Urva brachyura KY117547 1             | 0,1590544  |
| Helogale parvula SRR7637809 1         | Diplogale hosei MH464790 1            | 0,15905863 |
| Panthera uncia KP202269 1             | Hyaina hyaena NC020669 1              | 0,15905944 |
| Prionodon pardicolor NC024569 2       | Panthera tigris NC010642 35           | 0,15906456 |
| Panthera pardus NC010641 5            | Diplogale hosei MH464790 1            | 0,15906712 |
| Genetta abyssinica MG489822 1         | Crocota crocata NC020670 3            | 0,15909082 |
| Mustela erminea T305 2                | Leptonyx chotes weddellii NC008424 1  | 0,15910043 |
| Potos flavus T414 1                   | Mustela erminea T305 2                | 0,15910317 |
| Paradoxurus hermaphroditus NC039591 1 | Helogale parvula SRR7637809 1         | 0,1591102  |
| Proteles cristata T393 6              | Genetta abyssinica MG489822 1         | 0,15913007 |
| Leopardus jacobita NC028322 1         | Crocota crocata NC020670 3            | 0,15913901 |
| Prionailurus viverrinus NC028305 1    | Crocota crocata NC020670 3            | 0,15913908 |
| Panthera leo NERO 19                  | Hyaina hyaena NC020669 1              | 0,15916018 |
| Mellivora capensis T370 1             | Martes zibellina NC011579 39          | 0,15916279 |
| Potos flavus T414 1                   | Mustela kathiah NC023210 1            | 0,15916751 |
| Panthera uncia KP202269 1             | Urva javanica T413 1                  | 0,15918003 |
| Panthera pardus japonensis KJ866876 8 | Bdeogale nigripes GLC15 1             | 0,15918104 |
| Panthera uncia NC010638 1             | Paguma larvata PDD511 2               | 0,15918403 |
| Panthera uncia KP202269 1             | Diplogale hosei MH464790 1            | 0,15919401 |
| Prionodon pardicolor NC024569 2       | Cynogale bennetti KY117544 1          | 0,15923066 |
| Mellivora capensis T370 1             | Martes martes T302 3                  | 0,15924053 |
| Panthera pardus japonensis KJ866876 8 | Panthera pardus nasu CD7XAR110 1      | 0,15924929 |
| Puma concolor NC016470 22             | Crocota crocata NC020670 3            | 0,15927055 |
| Leopardus tigrinus NC028317 1         | Cynogale bennetti KY117544 1          | 0,15928851 |
| Odobenus rosmarus NC004029 29         | Monachus monachus NC044972 5          | 0,15929468 |
| Panthera onca KP202264 2              | Xenogale naso CD7XAR110 1             | 0,15931626 |
| Parahyaena brunnea NC038159 15        | Panthera uncia KP202269 1             | 0,15933181 |
| Panthera leo NERO 19                  | Urva brachyura KY117547 1             | 0,15934549 |
| Panthera leo NERO 19                  | Xenogale naso CD7XAR110 1             | 0,15934846 |
| Panthera pardus NC010641 5            | Urva javanica T413 1                  | 0,15934849 |
| Taxidea taxus NC020646 1              | Erigonathus barbatu NC008426 1        | 0,15937598 |
| Panthera tigris NC010642 35           | Mungos mungo MMC7 1                   | 0,15938964 |
| Suricata suricatta SSM10 1            | Proteles cristata T393 6              | 0,15939046 |
| Panthera tigris NC010642 35           | Helogale parvula SRR7637809 1         | 0,1593909  |
| Panthera uncia NC010638 1             | Cryptoprocta ferox FC13 1             | 0,15939337 |
| Panthera uncia NC010638 1             | Arctictis binturong T605 2            | 0,15940021 |
| Prionodon linsang ERR2391707 1        | Neofelis nebulosa NC008450 3          | 0,15941155 |
| Panthera pardus NC010641 5            | Ichneumia albicauda T603 1            | 0,15941641 |
| Neofelis nebulosa NC008450 3          | Cryptoprocta ferox FC13 1             | 0,15941849 |
| Mellivora capensis T370 1             | Martes melampus NC009678 1            | 0,15943199 |
| Prionodon linsang ERR2391707 1        | Panthera tigris NC010642 35           | 0,15943338 |
| Salanoia concolor D378 1              | Paradoxurus hermaphroditus NC039591 1 | 0,1594539  |
| Prionodon pardicolor NC024569 2       | Eupleres goudotii D128 1              | 0,15945403 |

|                                       |                                      |            |
|---------------------------------------|--------------------------------------|------------|
| Ursus arctos GU573491 207             | Chrotogale owstoni T607 1            | 0,18692458 |
| Gulo gulo NC009685 3                  | Canis lupus chanco NC010340 4        | 0,18692543 |
| Vulpes zerdia KJ603240 1              | Leptailurus serval NC028316 1        | 0,18692568 |
| Vulpes zerdia KJ603240 1              | Otocolobus manu NC028323 1           | 0,18692575 |
| Leopardus geoffroyi NC028320 1        | Arctocepalus townsendi NC008420 1    | 0,18692584 |
| Prionailurus viverrinus NC028305 1    | Canis anthus NC027956 2              | 0,18692657 |
| Viverricula indica XK891751 1         | Otocyon megalotis SAF 1 2            | 0,18692666 |
| Ursus arctos EU497665 29              | Lutra sumatrana NC035810 1           | 0,18692724 |
| Ursus arctos prunosus MG066703 3      | Arctocepalus australis MG023139 1    | 0,18692888 |
| Odobenus rosmarus NC004029 29         | Ailuurus fulgens NC011124 1          | 0,18692903 |
| Ursus arctos prunosus MG066703 3      | Fossa fossana D350 1                 | 0,18692914 |
| Xenogale naso CD7XAR110 1             | Canis aureus KT448274 1              | 0,18693005 |
| Otocyon megalotis SAF 1 2             | Martes martes T302 3                 | 0,18693072 |
| Paradoxurus jerdoni MH464793 1        | Martes foina NC020643 1              | 0,18693089 |
| Panthera tigris amoyensis NC014770 2  | Melogale moschata KP726273 1         | 0,18693213 |
| Ursus arctos prunosus MG066703 3      | Phocarcos hookeri NC008418 1         | 0,18693289 |
| Melogale moschata KP726273 1          | Arctictis binturong T605 2           | 0,18693404 |
| Ursus americanus JX196366 3           | Civettictis civetta NC033378 1       | 0,18693656 |
| Viverricula indica XK891745 1         | Ursus arctos prunosus MG066703 3     | 0,18693715 |
| Ursus thibetanus thibetanus NC0933    | Procyon lotor AB462046 3             | 0,18693888 |
| Martes foina NC020643 1               | Chrysocyon brachyurus NC024172 1     | 0,1869406  |
| Panthera tigris NC010642 35           | Melogale moschata NC020644 1         | 0,18694118 |
| Ursus maritimus GU573488 Svalbard     | Galictis vittata T412 1              | 0,18694721 |
| Ursus arctos isabellinus 1885 2       | Galictis vittata T412 1              | 0,18694726 |
| Ursus spelaeus NC011112 8             | Parahyaena brunnea NC038159 15       | 0,18694754 |
| Panthera tigris amoyensis NC014770 2  | Lctonyx striatus T299 1              | 0,18694839 |
| Panthera leo NERO 19                  | Lutra lutra LC050126 1               | 0,18695016 |
| Melursus ursinus NC009970 2           | Leopardus jacobita NC028322 1        | 0,18695091 |
| Lycalopex securus KT448284 1          | Arctonyx collaris NC020645 1         | 0,18695404 |
| Melogale moschata NC020644 1          | Canis lupus familiaris NC002008 1231 | 0,18695422 |
| Civettictis civetta NC033378 1        | Arctocepalus townsendi NC008420 1    | 0,18695705 |
| Neofelis nebulosa NC008450 3          | Mustela kathiah NC023210 1           | 0,18695959 |
| Profelis aurata NC028299 1            | Gulo gulo NC009685 3                 | 0,18696663 |
| Felis chaus NC001700 2                | Cuon alpinus NC013445 3              | 0,18696722 |
| Paradoxurus jerdoni MH464793 1        | Lutra lutra NC01358 9                | 0,18697052 |
| Lutra lutra LC050126 1                | Canis mesomelas KT448280 1           | 0,18697163 |
| Tremarctos ornatus NC009969 2         | Ursus semitorquatus MH464789 1       | 0,18697426 |
| Prionailurus planiceps NC028312 6     | Tapirus terrestris T358              | 0,18697427 |
| Lutra sumatrana NC035810 1            | Cynictis penicillata T375 1          | 0,18697461 |
| Meles leucurus NC039173 4             | Bdeogale nigripes GLC15 1            | 0,186975   |
| Xenogale naso CD7XAR110 1             | Callorhinus ursinus NC008415 1       | 0,18697536 |
| Meles anakuma NC009677 1              | Xenogale naso CD7XAR110 1            | 0,1869754  |
| Mustela eversmanni NC028013 1         | Ursus semitorquatus MH464789 1       | 0,18697613 |
| Prionodon linsang ERR2391707 1        | Potos flavus T414 1                  | 0,18697622 |
| Lontra canadensis SRR10409165 1       | Arctocepalus pusillus NC008417 1     | 0,18697856 |
| Bdeogale nigripes GLC15 1             | Arctocepalus gazella BK010918 1      | 0,18697912 |
| Urva brachyura KY117547 1             | Canis anthus NC027956 2              | 0,18698058 |
| Viverra tangalunga MH464792 1         | Cynogale bennetti KY117544 1         | 0,18698104 |
| Prionodon linsang ERR2391707 1        | Mustela kathiah NC023210 1           | 0,18698125 |
| Odobenus rosmarus NC004029 29         | Martes flavigula NC012141 3          | 0,18698235 |
| Melogale moschata KP726273 1          | Diplogale hosei MH464790 1           | 0,1869826  |
| Viverricula indica XK891745 1         | Arctocepalus townsendi NC008420 1    | 0,18698351 |
| Lutra lutra NC01358 9                 | Ichneumia albicauda T603 1           | 0,18698354 |
| Catopuma temminckii NC027115 41       | Tapirus terrestris T358              | 0,18698363 |
| Urva javanica T413 1                  | Arctocepalus pusillus NC008417 1     | 0,18698373 |
| Urva brachyura KY117547 1             | Arctocepalus pusillus NC008417 1     | 0,1869842  |
| Lynx pardinus NC028319 161            | Conepatus chinga NC042596 1          | 0,18698581 |
| Melursus ursinus NC009970 2           | Civettictis civetta NC033378 1       | 0,18698661 |
| Panthera uncia NC010638 1             | Lutra lutra LC050126 1               | 0,18698665 |
| Panthera onca KP202264 2              | Meles anakuma NC009677 1             | 0,18698736 |
| Lutrogale perspicillata NC035811 1    | Arctotherium sp NC030174 1           | 0,18698943 |
| Poecilogale albinucha T602 1          | Canis latrans NC008093 7             | 0,18698956 |
| Parahyaena brunnea NC038159 15        | Martes melampus NC009678 1           | 0,18698977 |
| Potos flavus T414 1                   | Panthera onca KP202264 2             | 0,18698977 |
| Vulpes lagopus NC026529 3             | Genetta genetta T297 1               | 0,18698984 |
| Catopuma temminckii NC027115 41       | Arctocepalus forsteri KT693377 17    | 0,18699077 |
| Catopuma badia NC028300 1             | Arctocepalus forsteri KT693377 17    | 0,18699087 |
| Vulpes vulpes NC008434 5              | Panthera uncia NC010638 1            | 0,18699089 |
| Puma concolor NC016470 22             | Arctocepalus forsteri KT693377 17    | 0,18699118 |
| Otocyon megalotis SAF 1 2             | Galidictis fasciata DM333 1          | 0,18699154 |
| Vulpes vulpes NC008434 5              | Leopardus jacobita NC028322 1        | 0,18699209 |
| Felis chaus NC028307 1                | Canis mesomelas KT448280 1           | 0,18699211 |
| Ursus maritimus NC003428 31           | Chrotogale owstoni T607 1            | 0,18699227 |
| Neovison vison NC020641 3             | Galidictis fasciata DM333 1          | 0,18699288 |
| Urocyon littoralis catalinae KP129018 | Lynx pardinus NC028319 161           | 0,18699294 |
| Prionailurus viverrinus NC028305 1    | Arctocepalus townsendi NC008420 1    | 0,18699302 |
| Proteles cristata T393 6              | Martes zibellina NC011579 39         | 0,18699491 |
| Ursus arctos prunosus MG066703 3      | Arctocepalus townsendi NC008420 1    | 0,18699556 |
| Puma concolor NC016470 22             | Lutrogale perspicillata NC035811 1   | 0,18699816 |
| Felis chaus NC028307 1                | Arctocepalus pusillus NC008417 1     | 0,18699856 |
| Melogale moschata KP726273 1          | Ailuropoda melanoleuca NC009492 5    | 0,18699858 |
| Otocyon megalotis SAF 1 2             | Caracal caracal NC028306 1           | 0,18700059 |
| Mungos mungo/gambianus SRR77048       | Galictis vittata T412 1              | 0,18700089 |
| Melursus ursinus NC009970 2           | Lutrogale perspicillata NC035811 1   | 0,18700129 |
| Martes americana NC020642 1           | Arctictis binturong T605 2           | 0,18700151 |
| Xenogale naso CD7XAR110 1             | Helarctos malayanus NC009968 2       | 0,18700309 |
| Paguma larvata PDD511 2               | Otaria byronia OTAB 1                | 0,18700367 |
| Mungos mungo/gambianus SRR77048       | Helarctos malayanus NC009968 2       | 0,187004   |
| Helarctos malayanus NC009968 2        | Cynictis penicillata T375 1          | 0,18700415 |
| Helarctos malayanus NC009968 2        | Galidictis fasciata DM333 1          | 0,18700448 |
| Ursus maritimus GU573488 Svalbard     | Prionailurus rubiginosus NC028304 2  | 0,18700458 |
| Zalophus wollebaeki SRR4431565 1      | Cryptoprocta ferox FC13 1            | 0,18700616 |
| Ursus thibetanus thibetanus NC011112  | Lontra canadensis SRR10409165 1      | 0,18700656 |
| Ursus spelaeus NC011112 8             | Bassaricyon neblina SRX1097850 1     | 0,18700667 |
| Zalophus wollebaeki SRR4431565 1      | Profelis aurata NC028299 1           | 0,18700777 |
| Leopardus pardalis T262 1             | Ailuropoda melanoleuca NC009492 5    | 0,18700871 |
| Speothos venaticus C48 2              | Catopuma badia NC028300 1            | 0,18701021 |
| Galidictis fasciata DM333 1           | Canis lupus chanco NC010340 4        | 0,18701123 |
| Lynx rufus NC014456 3                 | Galictis vittata T412 1              | 0,18701518 |
| Galictis vittata T412 1               | Felis margarita NC028308 1           | 0,18701573 |
| Helarctos malayanus NC009968 2        | Felis chaus NC001700 2               | 0,18701625 |
| Ursus arctos prunosus MG066703 3      | Leopardus colocolo NC028314 1        | 0,18702221 |
| Galictis vittata T412 1               | Arctictis binturong T605 2           | 0,1870233  |



|                                       |                                       |            |
|---------------------------------------|---------------------------------------|------------|
| Proteles cristata T393 6              | Profelis aurata NC028299 1            | 0,15947074 |
| Prionodon linsang ERR2391707 1        | Panthera pardus NC010641 5            | 0,15947817 |
| Prionodon linsang ERR2391707 1        | Mungos mungo MMC7 1                   | 0,15950558 |
| Paradoxurus hermaphroditus NC039591 1 | Eupleres goudotii D128 1              | 0,15950915 |
| Panthera uncia KP202269 1             | Urva brachyura KY117547 1             | 0,15951619 |
| Prionodon pardicolor NC024569 2       | Urva semitorquata MH464789 1          | 0,15951623 |
| Prionodon pardicolor NC024569 2       | Galerella sanguinea T378 1            | 0,15951677 |
| Panthera leo spelaea KX258452 2       | Ichneumia albicauda T603 1            | 0,15951702 |
| Hyaina hyaena NC020669 1              | Genetta genetta T297 1                | 0,15952726 |
| Mellivora capensis T370 1             | Martes foina NC020643 1               | 0,15957312 |
| Panthera uncia NC010638 1             | Urva javanica/auropunctata NC006835 1 | 0,15958416 |
| Panthera pardus japonensis KJ866876 8 | Ichneumia albicauda T603 1            | 0,15958467 |
| Neovison vison NC020641 3             | Bassariscus sumichrasti SRX1099089 1  | 0,15958944 |
| Proteles cristata T393 6              | Genetta servalina NC024568 2          | 0,15959549 |
| Genetta servalina NC024568 2          | Crocuta crocuta NC020670 3            | 0,15960564 |
| Proteles cristata T393 6              | Felis catus NC001700 2                | 0,15960689 |
| Panthera pardus NC010641 5            | Urva javanica/auropunctata NC006835 1 | 0,15960564 |
| Panthera uncia NC010638 1             | Helogale parvula SRR7637809 1         | 0,15965259 |
| Paguma larvata PDD511 2               | Galidia elegans D146 1                | 0,15965435 |
| Cryptoprocta ferox CFC13 1            | Arctictis binturong T605 2            | 0,15966894 |
| Prionailurus planiceps NC028312 6     | Crocuta crocuta NC020670 3            | 0,15967448 |
| Paradoxurus hermaphroditus NC039591 1 | Neofelis nebulosa NC008450 3          | 0,15968841 |
| Crocuta crocuta NC020670 3            | Acinonyx jubatus NC005212 3           | 0,15969436 |
| Prionodon linsang ERR2391707 1        | Panthera pardus japonensis KJ866876 8 | 0,1597169  |
| Suricata suricatta SSM10 1            | Panthera leo spelaea KX258452 2       | 0,15972015 |
| Panthera leo spelaea KX258452 2       | Cynictis penicillata T375 1           | 0,15972017 |
| Panthera tigris amoyensis NC014770 2  | Helogale parvula SRR7637809 1         | 0,15972754 |
| Suricata suricatta SSM10 1            | Panthera tigris amoyensis NC014770 2  | 0,15972796 |
| Parahyaena brunnea NC038159 15        | Panthera leo spelaea KX258452 2       | 0,15973032 |
| Neofelis nebulosa NC008450 3          | Urva semitorquata MH464789 1          | 0,15974948 |
| Panthera pardus NC010641 5            | Bdeogale nigripes GLC15 1             | 0,15975317 |
| Mellivora capensis T370 1             | Martes pennanti NC020664 16           | 0,15978019 |
| Odobenus rosmarus NC004029 29         | Halichoerus grypus NC001602 2         | 0,15978335 |
| Panthera onca KP202264 2              | Urva brachyura KY117547 1             | 0,15978514 |
| Panthera pardus japonensis KJ866876 8 | Urva javanica T413 1                  | 0,159786   |
| Viverricula indica NC025296 2         | Proteles cristata T393 6              | 0,1598025  |
| Phoca groenlandica NC008429 54        | Odobenus rosmarus NC004029 29         | 0,15980428 |
| Proteles cristata T393 6              | Panthera pardus japonensis KJ866876 8 | 0,15980826 |
| Mellivora capensis T370 1             | Martes flavigula NC012141 3           | 0,15982376 |
| Prionodon linsang ERR2391707 1        | Urva brachyura KY117547 1             | 0,15983379 |
| Procyon lotor AB462049 4              | Bassariscus neblina SRX1097850 1      | 0,15985011 |
| Prionodon pardicolor NC024569 2       | Crossarchus platycephalus C7R66 1     | 0,15985255 |
| Panthera leo spelaea KX258452 2       | Bdeogale nigripes GLC15 1             | 0,15985332 |
| Prionodon linsang ERR2391707 1        | Panthera tigris amoyensis NC014770 2  | 0,15985751 |
| Proteles cristata T393 6              | Civettictis civetta NC033378 1        | 0,15990123 |
| Prionodon linsang ERR2391707 1        | Panthera uncia NC010638 1             | 0,15991837 |
| Panthera uncia KP202269 1             | Cynictis penicillata T375 1           | 0,15992087 |
| Paguma larvata PDD511 2               | Cryptoprocta ferox CFC13 1            | 0,15992188 |
| Proteles cristata T393 6              | Civettictis civetta GLC19 1           | 0,15993254 |
| Paradoxurus jerdoni MH464793 1        | Panthera onca NC022842 1              | 0,159933   |
| Proteles cristata T393 6              | Felis chaus NC028307 1                | 0,159945   |
| Felis catus NC001700 2                | Cynogale bennetti KY117544 1          | 0,15996182 |
| Parahyaena brunnea NC038159 15        | Neofelis nebulosa NC008450 3          | 0,15996949 |
| Prionodon linsang ERR2391707 1        | Urva semitorquata MH464789 1          | 0,15997845 |
| Pusa caspica NC008431 1               | Odobenus rosmarus NC004029 29         | 0,16000327 |
| Panthera tigris amoyensis NC014770 2  | Hyaina hyaena NC020669 1              | 0,16000775 |
| Panthera tigris NC010642 35           | Urva javanica/auropunctata NC006835 1 | 0,16002655 |
| Prionodon pardicolor NC024569 2       | Xenogale naso C07XAR110 1             | 0,16005515 |
| Panthera onca KP202264 2              | Ichneumia albicauda T603 1            | 0,1600576  |
| Panthera tigris NC010642 35           | Diplogale hosei MH464790 1            | 0,16006009 |
| Neofelis nebulosa NC008450 3          | Xenogale naso C07XAR110 1             | 0,16008975 |
| Paradoxurus hermaphroditus NLNC 1     | Cryptoprocta ferox CFC13 1            | 0,1601239  |
| Panthera tigris amoyensis NC014770 2  | Urva javanica T413 1                  | 0,16012935 |
| Viverricula indica KX891751 1         | Hyaina hyaena NC020669 1              | 0,16013163 |
| Leptailurus serval NC028316 1         | Crocuta crocuta NC020670 3            | 0,16014731 |
| Neofelis nebulosa NC008450 3          | Attilax paludinosus T606 1            | 0,16015753 |
| Leptonychotes weddellii NC008424 1    | Arctotherium sp NC030174 1            | 0,16018587 |
| Panthera pardus japonensis KJ866876 8 | Cynictis penicillata T375 1           | 0,16019002 |
| Panthera uncia KP202269 1             | Xenogale naso C07XAR110 1             | 0,16019168 |
| Suricata suricatta SSM10 1            | Panthera uncia KP202269 1             | 0,16019173 |
| Panthera pardus japonensis KJ866876 8 | Urva brachyura KY117547 1             | 0,16025667 |
| Panthera tigris NC010642 35           | Eupleres goudotii D128 1              | 0,16026683 |
| Panthera uncia NC010638 1             | Hyaina hyaena NC020669 1              | 0,16027136 |
| Pusa sibirica NC008432 2              | Odobenus rosmarus NC004029 29         | 0,16027266 |
| Proteles cristata T393 6              | Odocoileus manul NC028323 1           | 0,16028285 |
| Panthera pardus NC010641 5            | Cynictis penicillata T375 1           | 0,16029148 |
| Panthera tigris amoyensis NC014770 2  | Urva javanica/auropunctata NC006835 1 | 0,16029586 |
| Nandinia binotata NC024567 1          | Lobodon carcinophaga NC008423 1       | 0,16032238 |
| Prionodon linsang ERR2391707 1        | Panthera leo spelaea KX258452 2       | 0,16032772 |
| Panthera leo spelaea KX258452 2       | Xenogale naso C07XAR110 1             | 0,16033068 |
| Panthera leo spelaea KX258452 2       | Hyaina hyaena NC020669 1              | 0,16033429 |
| Viverricula indica KX891751 1         | Parahyaena brunnea NC038159 15        | 0,16034168 |
| Proteles cristata T393 6              | Panthera leo NERO 19                  | 0,16038163 |
| Viverra zibetha T609 1                | Parahyaena brunnea NC038159 15        | 0,16040879 |
| Felis silvestris lybica KP202275 4    | Crocuta crocuta NC020670 3            | 0,16041496 |
| Panthera pardus japonensis KJ866876 8 | Urva javanica/auropunctata NC006835 1 | 0,16042484 |
| Lynx lynx NC027083 4                  | Cynogale bennetti KY117544 1          | 0,16043298 |
| Mellivora capensis T370 1             | Martes americana NC020642 1           | 0,16044149 |
| Paradoxurus jerdoni MH464793 1        | Galidia elegans D146 1                | 0,16046323 |
| Hydrurga leptonyx NC008425 1          | Bassariscus sumichrasti SRX1099089 1  | 0,16046441 |
| Panthera tigris amoyensis NC014770 2  | Galerella sanguinea T378 1            | 0,16046751 |
| Parahyaena brunnea NC038159 15        | Paguma larvata PDD511 2               | 0,16046947 |
| Hemigalus derbyanus MH464791 1        | Cryptoprocta ferox CFC13 1            | 0,16047546 |
| Parahyaena brunnea NC038159 15        | Genetta genetta T297 1                | 0,16047595 |
| Parahyaena brunnea NC038159 15        | Panthera tigris amoyensis NC014770 2  | 0,16048291 |
| Prionodon linsang ERR2391707 1        | Attilax paludinosus T606 1            | 0,1605171  |
| Panthera uncia KP202269 1             | Galerella sanguinea T378 1            | 0,16052853 |
| Odobenus rosmarus NC004029 29         | Cystophora cristata NC008427 1        | 0,16053991 |
| Neofelis nebulosa NC008450 3          | Helogale parvula SRR7637809 1         | 0,16055772 |
| Panthera uncia KP202269 1             | Urva javanica/auropunctata NC006835 1 | 0,16055949 |
| Lynx canadensis NC028313 1            | Cynogale bennetti KY117544 1          | 0,16056772 |
| Prionodon linsang ERR2391707 1        | Cynictis penicillata T375 1           | 0,16058443 |
| Taxidea taxus NC020646 1              | Cystophora cristata NC008427 1        | 0,16059066 |

|                                        |                                       |            |
|----------------------------------------|---------------------------------------|------------|
| Panthera pardus NC010641 5             | Ailurus fulgens NC011124 1            | 0,18702599 |
| Ursus arctos GU573486 5                | Leopardus colocolo NC028314 1         | 0,18702844 |
| Profelis aurata NC028299 1             | Martes flavigula NC012141 3           | 0,18703201 |
| Otocyon megalotis SAF 1 2              | Civettictis civetta NC033378 1        | 0,18703666 |
| Profelis aurata NC028299 1             | Eumetopias jubatus NC004030 10        | 0,18703969 |
| Urva javanica T413 1                   | Canis mesomelas KT448280 1            | 0,18704151 |
| Cynictis penicillata T375 1            | Callorhinus ursinus NC008415 1        | 0,18704168 |
| Mungos mungo/gambianus SRR77048 3      | Melogale moschata KP726273 1          | 0,18704231 |
| Nyctereutes procyonoides NC013700 3    | Enhydra lutris NC009692 1             | 0,18704459 |
| Eupleres goudotii D128 1               | Arctocepalus gazella BK010918 1       | 0,18704793 |
| Prionailurus viverrinus NC028305 1     | Conepatus chinga NC042596 1           | 0,18704918 |
| Lutrogale perspicillata NC035811 1     | Galidictis fasciata DM333 1           | 0,18705024 |
| Melogale moschata NC020644 1           | Helogale parvula SRR7637809 1         | 0,18705039 |
| Mungotictis decemlineata NC027828 2    | Arctocepalus pusillus NC008417 1      | 0,1870518  |
| Lynx lynx NC027083 4                   | Conepatus chinga NC042596 1           | 0,18705206 |
| Panthera pardus japonensis KJ866876 8  | Ailurus fulgens styani NC009691 1     | 0,18705308 |
| Vulpes lagopus NC026529 3              | Arctodus simus NC011116 1             | 0,18705552 |
| Galerella sanguinea T378 1             | Arctocepalus australis MGO23139 1     | 0,18705539 |
| Nyctereutes procyonoides NC013700 3    | Martes pennanti NC020664 16           | 0,18705602 |
| Hyaina hyaena NC020669 1               | Bassariscus sumichrasti SRX1099089 1  | 0,18705742 |
| Lutra sumatrana NC035810 1             | Canis aureus KT448274 1               | 0,18705769 |
| Felis margarita NC028308 1             | Arctocepalus forsteri KT693377 17     | 0,18705834 |
| Puma yagouaroundi NC028311 1           | Arctocepalus australis MGO23139 1     | 0,18705851 |
| Lutra sumatrana NC035810 1             | Crocuta crocuta NC020670 3            | 0,18705867 |
| Lynx canadensis NC028313 1             | Arctocepalus townsendi NC008420 1     | 0,1870587  |
| Ursus maritimus GU573488 Svalbard      | Chrotogale owstoni T607 1             | 0,18705967 |
| Ursus thibetanus mupinensis NC008795 1 | Lontra canadensis SRR10409165 1       | 0,18706056 |
| Meles meles T303 3                     | Lycaon pictus NC028427 2              | 0,18706077 |
| Puma yagouaroundi NC028311 1           | Neophoca cinerea NC008419 1           | 0,18706295 |
| Urocyon littoralis catalinae KP129018  | Catopuma badia NC028300 1             | 0,18706341 |
| Catopuma temminckii NC027115 41        | Aonyx cinerea NC035814 2              | 0,18706349 |
| Pardofelis marmorata NLN3 2            | Aonyx cinerea NC035814 2              | 0,18706393 |
| Ursus arctos EU497665 29               | Paradoxurus jerdoni MH464793 1        | 0,18706642 |
| Viverra tangalunga MH464792 1          | Panthera tigris amoyensis NC014770 2  | 0,18706673 |
| Puma concolor NC016470 22              | Arctotherium sp NC030174 1            | 0,18706696 |
| Vulpes lagopus NC026529 3              | Panthera tigris amoyensis NC014770 2  | 0,18706721 |
| Ursus thibetanus thibetanus NC011118 1 | Mungos mungo MMC7 1                   | 0,18707117 |
| Ursus arctos EU497665 29               | Profelis aurata NC028299 1            | 0,18707219 |
| Ursus spelaeus NC011112 8              | Lontra canadensis SRR10409165 1       | 0,18707412 |
| Zalophus wollebaeki SRR4431565 1       | Ichneumia albicauda T603 1            | 0,18707627 |
| Speothos venaticus C48 2               | Catopuma temminckii NC027115 41       | 0,18707629 |
| Speothos venaticus C48 2               | Prionailurus bengalensis CKM45 20     | 0,1870777  |
| Canis latrans NC008093 7               | Ailuropoda melanoleuca NC009492 5     | 0,18707736 |
| Felis silvestris lybica KP202275 4     | Ailuropoda melanoleuca NC009492 5     | 0,18707739 |
| Viverricula indica KX891745 1          | Galictis vittata T412 1               | 0,18707769 |
| Mungotictis decemlineata NC027828 2    | Canis lupus chanco NC010340 4         | 0,18707867 |
| Ursus spelaeus EU327344 13             | Prionailurus planiceps KY682741 4     | 0,18707947 |
| Ursus thibetanus formosanus NC009333 1 | Panthera pardus japonensis KJ866876 8 | 0,18707968 |
| Ursus spelaeus NC011112 8              | Paradoxurus hermaphroditus NLNC 1     | 0,18708093 |
| Ursus arctos EU497665 29               | Arctictis binturong T605 2            | 0,18708095 |
| Ursus maritimus GU573488 Svalbard      | Urocyon striatus T299 1               | 0,18708108 |
| Ursus spelaeus NC011112 8              | Genetta genetta T297 1                | 0,18708144 |
| Leopardus tigrinus NC028317 1          | Heliarctos malayanus NC009968 2       | 0,18708409 |
| Ursus thibetanus thibetanus NC028305 1 | Prionailurus viverrinus NC028305 1    | 0,18708494 |
| Zalophus californianus NC008416 1      | Paradoxurus hermaphroditus NLNC 1     | 0,18708517 |
| Melurus ursinus NC009970 2             | Felis chaus NC028307 1                | 0,187086   |
| Ursus spelaeus EU327344 13             | Galictis vittata T412 1               | 0,18709594 |
| Ursus spelaeus EU327344 13             | Mephitis mephitis NC020648 1          | 0,18709612 |
| Mustela itatsi NC034330 19             | Cuon alpinus NC013445 3               | 0,18709767 |
| Meles leucurus NC039173 4              | Lycalopex sechurae KT448284 1         | 0,18709797 |
| Ursus americanus JX196366 3            | Procyon lotor AB462046 3              | 0,18710022 |
| Prionailurus bengalensis NC028301 12   | Arctocepalus forsteri NC004023 28     | 0,18710087 |
| Urocyon striatus T299 1                | Ailuropoda melanoleuca NC009492 5     | 0,18710115 |
| Mustela eversmannii NC028013 1         | Arctocepalus forsteri KT693377 17     | 0,18710968 |
| Eupleres goudotii D128 1               | Enhydra lutris NC009692 1             | 0,18710975 |
| Mustela eversmannii NC028013 1         | Mungos mungo/gambianus SRR77048 3     | 0,18711051 |
| Cynictis penicillata T375 1            | Arctocepalus australis MGO23139 1     | 0,18711203 |
| Mustela putorius NC020638 4            | Bdeogale nigripes GLC15 1             | 0,1871126  |
| Viverra tangalunga MH464792 1          | Urva javanica T413 1                  | 0,1871132  |
| Vulpes ferrillata NC027935 1           | Melogale moschata KP726273 1          | 0,18711357 |
| Arctocepalus forsteri NC004023 28      | Acinonyx jubatus NC005212 3           | 0,18711361 |
| Xenogale naso C07XAR110 1              | Canis anthus NC027956 2               | 0,18711409 |
| Urva brachyura KY117547 1              | Ailurus fulgens styani NC009691 1     | 0,18711485 |
| Mustela sibirica AP017394 11           | Mungotictis decemlineata NC027828 2   | 0,18711667 |
| Paradoxurus jerdoni MH464793 1         | Arctocepalus forsteri KT693377 17     | 0,18711671 |
| Vulpes ferrillata NC027935 1           | Mustela sibirica AP017394 11          | 0,18711708 |
| Salanoia concolor D378 1               | Ailurus fulgens styani NC009691 1     | 0,1871185  |
| Mustela sibirica AP017394 11           | Galerella sanguinea T378 1            | 0,18712068 |
| Canis anthus NC027956 2                | Bassariscus sumichrasti SRX1099089 1  | 0,18712206 |
| Lutra sumatrana NC035810 1             | Ichneumia albicauda T603 1            | 0,1871223  |
| Martes foina NC020643 1                | Lycalopex sechurae KT448284 1         | 0,18712242 |
| Panthera uncia KP202269 1              | Callorhinus ursinus NC008418 1        | 0,18712264 |
| Mustela altaica NC021751 1             | Attilax paludinosus T606 1            | 0,18712319 |
| Mustela sibirica AP017394 11           | Cryptoprocta ferox CFC13 1            | 0,18712392 |
| Otocyon megalotis SAF 1 2              | Mungotictis decemlineata NC027828 2   | 0,18712589 |
| Profelis aurata NC028299 1             | Mustela sibirica AP017394 11          | 0,18712589 |
| Paradoxurus hermaphroditus NC039591 1  | Melogale moschata NC020644 1          | 0,18712603 |
| Panthera pardus japonensis KJ866876 8  | Lutra sumatrana NC035810 1            | 0,18712622 |
| Leopardus guigna NC028321 1            | Arctocepalus townsendi NC008420 1     | 0,18712769 |
| Parahyaena brunnea NC038159 15         | Mustela eversmannii NC028013 1        | 0,18712784 |
| Viverricula indica NC025296 2          | Phocarcotus hookeri NC008418 1        | 0,18712844 |
| Taxidea taxus NC020646 1               | Panthera uncia NC010638 1             | 0,1871286  |
| Conepatus chinga NC042596 1            | Acinonyx jubatus NC005212 3           | 0,18712883 |
| Urocyon striatus T299 1                | Urva javanica T413 1                  | 0,18712966 |
| Ursus spelaeus NC011112 8              | Conepatus chinga NC042596 1           | 0,18712983 |
| Zalophus wollebaeki SRR4431565 1       | Cynictis penicillata T375 1           | 0,18713076 |
| Panthera leo spelaea KX258452 2        | Enhydra lutris NC009692 1             | 0,18713355 |
| Viverricula indica NC025296 2          | Ursus arctos EU573491 207             | 0,18713433 |
| Viverricula indica NC025296 2          | Ursus arctos EU497665 29              | 0,18713443 |
| Phocarcotus hookeri NC008418 1         | Galictis vittata T412 1               | 0,18713465 |
| Ursus maritimus GU573488 Svalbard      | Genetta genetta T297 1                | 0,18713482 |
| Ursus maritimus GU573488 Svalbard      | Paguma larvata PDD511 2               | 0,18713491 |
| Puma concolor NC016470 22              | Otaria byronia OTAB 1                 | 0,18713556 |

|                                       |                                       |            |
|---------------------------------------|---------------------------------------|------------|
| Panthera uncia NC010638 1             | Galerella sanguinea T378 1            | 0,16059595 |
| Paradoxurus hermaphroditus NC039591 1 | Mungotictis decemlineata NC027828 1   | 0,16059825 |
| Crocota crocata NC020670 3            | Civettictis civetta GLC19 1           | 0,16061515 |
| Neofelis nebulosa NC008450 3          | Chrotogale owstoni T607 1             | 0,16062416 |
| Panthera uncia NC010638 1             | Urva brachyura KY117547 1             | 0,16066106 |
| Prionodon pardicolor NC024569 2       | Urva brachyura KY117547 1             | 0,16066213 |
| Panthera uncia NC010638 1             | Mungos mungo/gambianus SRR7704821 1   | 0,16066217 |
| Panthera tigris amoyensis NC014770 2  | Xenogale naso C07XAR110 1             | 0,16067016 |
| Parahaena brunnea NC038159 15         | Panthera uncia NC010638 1             | 0,16067877 |
| Proteles cristata T393 6              | Acinonyx jubatus NC005212 3           | 0,16070235 |
| Proteles cristata T393 6              | Panthera pardus NC010641 5            | 0,16072132 |
| Crocota crocata NC020670 3            | Civettictis civetta NC033378 1        | 0,16072179 |
| Salanoia concolor D378 1              | Prionodon pardicolor NC024569 2       | 0,16073391 |
| Panthera tigris NC010642 35           | Galerella sanguinea T378 1            | 0,16073695 |
| Viverricula indica XK891745 1         | Proteles cristata T393 6              | 0,16074009 |
| Panthera tigris NC010642 35           | Hyaena hyaena NC020669 1              | 0,16074857 |
| Parahaena brunnea NC038159 15         | Panthera tigris NC010642 35           | 0,16075231 |
| Monachus monachus NC004972 5          | Arctodus simus NC011116 1             | 0,16076142 |
| Leptonyx chotes weddellii NC008424 1  | Bassariscus sumichrasti SRX1099089 1  | 0,16079096 |
| Galerella sanguinea T378 1            | Cynogale bennetti KY117544 1          | 0,16079557 |
| Viverricula indica NC025296 2         | Crocota crocata NC020670 3            | 0,16080226 |
| Paradoxurus jerdoni MH464793 1        | Panthera leo spelaea KX258452 2       | 0,16080995 |
| Neofelis nebulosa NC008450 3          | Galerella sanguinea T378 1            | 0,16082768 |
| Neofelis nebulosa NC008450 3          | Hyaena hyaena NC020669 1              | 0,16084103 |
| Mungos mungo MMC7 1                   | Cynogale bennetti KY117544 1          | 0,1608492  |
| Fossa fossana D350 1                  | Cynogale bennetti KY117544 1          | 0,16085185 |
| Suricata suricatta SSM10 1            | Paradoxurus hermaphroditus NC039591 1 | 0,16086076 |
| Paradoxurus hermaphroditus NC039591 1 | Panthera tigris amoyensis NC014770 2  | 0,16087186 |
| Paradoxurus jerdoni MH464793 1        | Panthera tigris amoyensis NC014770 2  | 0,16087243 |
| Pusa hispida NC 008433 1              | Arctodus simus NC011116 1             | 0,16087401 |
| Panthera uncia NC010638 1             | Urva javanica T413 1                  | 0,16093909 |
| Neovison vison NC020641 3             | Lobodon carcinophaga NC008423 1       | 0,16093571 |
| Viverricula indica XK891745 1         | Crocota crocata NC020670 3            | 0,16093552 |
| Proteles cristata T393 6              | Panthera leo spelaea KX258452 2       | 0,16096033 |
| Mustela erminea T305 2                | Mellivora capensis T370 1             | 0,16099718 |
| Panthera leo spelaea KX258452 2       | Diplogale hosei MH464790 1            | 0,16099738 |
| Panthera uncia KP202269 1             | Bdeogale nigripes GLC15 1             | 0,16099921 |
| Paguma larvata PDD511 2               | Hyaena hyaena NC020669 1              | 0,16100021 |
| Phoca fasciata NC008428 1             | Arctodus simus NC011116 1             | 0,16100423 |
| Hydrurga leptonyx NC008425 1          | Homotherium latidens MF871702 3       | 0,16101438 |
| Proteles cristata T393 6              | Panthera onca KP202264 2              | 0,16101991 |
| Panthera pardus NC010641 5            | Urva brachyura KY117547 1             | 0,16103198 |
| Pusa sibirica NC008432 2              | Arctodus simus NC011116 1             | 0,1610643  |
| Martes foina NC020643 1               | Bassariscus sumichrasti SRX1099089 1  | 0,16107215 |
| Paradoxurus hermaphroditus NC039591 1 | Panthera tigris NC010642 35           | 0,16107418 |
| Neofelis nebulosa NC008450 3          | Diplogale hosei MH464790 1            | 0,16111496 |
| Procyon lotor AB462049 4              | Mustela erminea T305 2                | 0,16112736 |
| Panthera uncia KP202269 1             | Ichneumia albicauda T603 1            | 0,16113539 |
| Paradoxurus hermaphroditus NC039591 1 | Panthera uncia KP202269 1             | 0,16113569 |
| Lobodon carcinophaga NC008423 1       | Bassariscus sumichrasti SRX1099089 1  | 0,16113845 |
| Panthera tigris NC010642 35           | Urva javanica T413 1                  | 0,16113949 |
| Paradoxurus hermaphroditus NC039591 1 | Panthera leo spelaea KX258452 2       | 0,16114165 |
| Prionodon linsang ERR2391707 1        | Xenogale naso C07XAR110 1             | 0,16119041 |
| Procyon lotor AB462046 3              | Mustela erminea T305 2                | 0,16119477 |
| Mustela erminea T305 2                | Lobodon carcinophaga NC008423 1       | 0,16119775 |
| Prionodon pardicolor NC024569 2       | Bdeogale nigripes GLC15 1             | 0,16120046 |
| Panthera leo spelaea KX258452 2       | Galerella sanguinea T378 1            | 0,16120085 |
| Urva javanica/auropunctata NC006835 1 | Cynogale bennetti KY117544 1          | 0,16122255 |
| Pardofelis marmorata NLN3 1           | Cynogale bennetti KY117544 1          | 0,16124132 |
| Prionodon linsang ERR2391707 1        | Bdeogale nigripes GLC15 1             | 0,16125774 |
| Panthera tigris NC010642 35           | Xenogale naso C07XAR110 1             | 0,16127627 |
| Mellivora capensis T370 1             | Lutra sumatrana NC035810 1            | 0,16131638 |
| Nasua nasua NC020647 1                | Bassariscus sumichrasti SRX1099089 1  | 0,16132934 |
| Pusa caspica NC008431 1               | Arctodus simus NC011116 1             | 0,16140094 |
| Neofelis nebulosa NC008450 3          | Galidia elegans D146 1                | 0,16143544 |
| Mustela altaica NC021751 1            | Bassariscus sumichrasti SRX1099089 1  | 0,16147397 |
| Panthera tigris amoyensis NC014770 2  | Ichneumia albicauda T603 1            | 0,1614791  |
| Taxidea taxus NC020646 1              | Potos flavus T414 1                   | 0,16151594 |
| Panthera uncia NC010638 1             | Xenogale naso C07XAR110 1             | 0,16153826 |
| Suricata suricatta SSM10 1            | Panthera tigris NC010642 35           | 0,16154598 |
| Proteles cristata T393 6              | Panthera onca NC022842 1              | 0,16156752 |
| Neofelis nebulosa NC008450 3          | Ichneumia albicauda T603 1            | 0,16156977 |
| Cynogale bennetti KY117544 1          | Bdeogale nigripes GLC15 1             | 0,16158916 |
| Panthera uncia NC010638 1             | Cynictis penicillata T375 1           | 0,1615894  |
| Paradoxurus hermaphroditus NC039591 1 | Cynictis penicillata T375 1           | 0,16160443 |
| Prionodon pardicolor NC024569 2       | Galidia elegans D146 1                | 0,1616082  |
| Prionodon pardicolor NC024569 2       | Mungotictis decemlineata NC027828 1   | 0,16160917 |
| Proteles cristata T393 6              | Urva brachyura KY117547 1             | 0,16161306 |
| Crocota crocata NC020670 3            | Caracal caracal NC028306 1            | 0,16162826 |
| Hemigalus derbyanus MH464791 1        | Crocota crocata NC020670 3            | 0,16163258 |
| Prionodon linsang ERR2391707 1        | Cynogale bennetti KY117544 1          | 0,16164024 |
| Prionodon linsang ERR2391707 1        | Helogale parvula SRR7637809 1         | 0,16166173 |
| Potos flavus T414 1                   | Leptonyx chotes weddellii NC008424 1  | 0,16166407 |
| Erignathus barbatus NC008426 1        | Arctodus simus NC011116 1             | 0,16167088 |
| Potos flavus T414 1                   | Hydrurga leptonyx NC008425 1          | 0,16167472 |
| Panthera tigris amoyensis NC014770 2  | Bdeogale nigripes GLC15 1             | 0,16167967 |
| Panthera onca KP202264 2              | Crocota crocata NC020670 3            | 0,16169177 |
| Panthera uncia NC010638 1             | Diplogale hosei MH464790 1            | 0,16169225 |
| Felis margarita NC028308 1            | Crocota crocata NC020670 3            | 0,16169482 |
| Neofelis nebulosa NC008450 3          | Bdeogale nigripes GLC15 1             | 0,16170299 |
| Martes melampus NC009678 1            | Bassariscus sumichrasti SRX1099089 1  | 0,16172686 |
| Prionodon pardicolor NC024569 2       | Galidictis fasciata DM333 1           | 0,1617436  |
| Urva brachyura KY117547 1             | Cynogale bennetti KY117544 1          | 0,16185845 |
| Hydrurga leptonyx NC008425 1          | Enhydra lutris NC009692 1             | 0,16186605 |
| Meles meles T303 3                    | Hydrurga leptonyx NC008425 1          | 0,16186769 |
| Potos flavus T414 1                   | Lobodon carcinophaga NC008423 1       | 0,16187628 |
| Panthera pardus NC010641 5            | Cynogale bennetti KY117544 1          | 0,1618765  |
| Lutra sumatrana NC035810 1            | Bassariscus sumichrasti SRX1099089 1  | 0,16192968 |
| Prionodon pardicolor NC024569 2       | Atlix paludinosus T606 1              | 0,16194041 |
| Panthera tigris amoyensis NC014770 2  | Cynictis penicillata T375 1           | 0,16194765 |
| Felis nigripes NC028309 1             | Crocota crocata NC020670 3            | 0,16196311 |
| Panthera tigris NC010642 35           | Crocota crocata NC020670 3            | 0,16196764 |
| Neofelis nebulosa NC008450 3          | Mungos mungo MMC7 1                   | 0,16197155 |

|                                       |                                       |            |
|---------------------------------------|---------------------------------------|------------|
| Speothos venaticus C48 2              | Civettictis civetta GLC19 1           | 0,18713586 |
| Ursus maritimus NC003428 31           | Prionailurus rubiginosus NC028304 2   | 0,18713926 |
| Ursus maritimus NC003428 31           | Prionailurus bengalensis NC028301 12  | 0,1871395  |
| Martes zibellina NC011579 39          | Hemigalus derbyanus MH464791 1        | 0,18714049 |
| Lycalopex schuhræe KT448284 1         | Genetta abysynica MG489822 1          | 0,18714283 |
| Mustela nivalis T306 5                | Chrysocyon brachyurus NC024172 1      | 0,18714409 |
| Genetta genetta T297 1                | Ailuropoda melanoleuca NC009492 5     | 0,18714447 |
| Lutra lutra NC011358 9                | Canis lupus chanco NC010340 4         | 0,18714523 |
| Galictis vittata T412 1               | Arctotherium sp NC030174 1            | 0,18714556 |
| Mustela nivalis T306 5                | Ailuropoda melanoleuca NC009492 5     | 0,1871459  |
| Caracal caracal NC028306 1            | Ailuropoda melanoleuca NC009492 5     | 0,18714601 |
| Spilogale putorius NC010497 1         | Eumetopias jubatus NC004030 10        | 0,1871461  |
| Ursus thibetanus thibetanus NC011116  | Cryptoprocta ferox CFC13 1            | 0,18714671 |
| Ursus thibetanus formosanus NC0093    | Prionodon pardicolor NC024569 2       | 0,18714726 |
| Viverricula indica XK891745 1         | Ursus arctos AP012576 6               | 0,18714735 |
| Ursus thibetanus laniger MH281753 2   | Panthera pardus japonensis KJ866876   | 0,18714914 |
| Phocartos hookeri NC008418 1          | Leopardus colocolo NC028314 1         | 0,18714944 |
| Paradoxurus hermaphroditus NLNC 1     | Helarctos malayanus NC009968 2        | 0,18715189 |
| Puma concolor NC016470 22             | Helarctos malayanus NC009968 2        | 0,18715225 |
| Diplogale hosei MH464790 1            | Tapiurus terayris T358                | 0,18715376 |
| Panthera lotor AB462049 4             | Arctocepalus forsteri NC004023 28     | 0,18715644 |
| Martes pennanti NC020664 16           | Urva javanica/auropunctata NC006835   | 0,18715714 |
| Arctictis binturong T605 2            | Ailuropoda melanoleuca NC009492 5     | 0,18716155 |
| Panthera onca NC022842 1              | Canis lupus chanco NC010340 4         | 0,18716288 |
| Mustela altaica NC021751 1            | Urva javanica/auropunctata NC006835   | 0,18716462 |
| Viverra tangalunga MH464792 1         | Panthera pardus NC010641 5            | 0,18716612 |
| Lycalopex schuhræe KT448284 1         | Genetta genetta T297 1                | 0,18716635 |
| Panthera leo NERO 19                  | Arctodus simus NC011116 1             | 0,18716785 |
| Felis nigripes NC028309 1             | Cuon alpinus NC013445 3               | 0,18716912 |
| Prionailurus planiceps NC028312 6     | Cuon alpinus NC013445 3               | 0,18717024 |
| Prionailurus bengalensis CKM45 20     | Arctocepalus forsteri NC004023 28     | 0,18717065 |
| Ursus americanus JX196366 3           | Otocolobus manul NC028323 1           | 0,18717158 |
| Lutra lutra NC011358 9                | Helogale parvula SRR7637809 1         | 0,18717247 |
| Martes melampus NC009678 1            | Urva brachyura KY117547 1             | 0,18717365 |
| Ursus americanus JX196366 3           | Prionailurus bengalensis CKM45 20     | 0,18717387 |
| Paradoxurus hermaphroditus NC039591 1 | Enhydra lutris NC009692 1             | 0,18717454 |
| Mustela eversmannii NC028013 1        | Arctocepalus australis MG023139 1     | 0,18717703 |
| Melogale moschata KP726273 1          | Cynictis penicillata T375 1           | 0,18717815 |
| Mustela putorius NC020638 4           | Helogale parvula SRR7637809 1         | 0,1871787  |
| Ursus thibetanus mupinensis NC00875   | Canis lupus chanco NC010340 4         | 0,18717924 |
| Cynictis penicillata T375 1           | Arctocepalus forsteri KT693377 17     | 0,18717948 |
| Potos flavus T414 1                   | Urva brachyura KY117547 1             | 0,18718071 |
| Prionodon pardicolor NC024569 2       | Lutra lutra LC050126 1                | 0,18718219 |
| Prionodon linsang ERR2391707 1        | Mustela sibirica NC020637 6           | 0,18718255 |
| Meles anakuma NC009677 1              | Galidia elegans D146 1                | 0,18718332 |
| Procyon lotor AB462049 4              | Ursus semitorquatus MH464789 1        | 0,18718337 |
| Vulpes zerdia KJ603240 1              | Mustela sibirica AP017394 11          | 0,18718487 |
| Otaria byronia OTAB 1                 | Ursus semitorquatus MH464789 1        | 0,18718499 |
| Martes pennanti NC020664 16           | Urva javanica T413 1                  | 0,18718611 |
| Ursus maritimus NC014456 3            | Conepatus chinga NC042596 1           | 0,18718777 |
| Vulpes lagopus NC026529 3             | Paradoxurus jerdoni MH464793 1        | 0,18718943 |
| Ursus maritimus NC003428 31           | Lutra lutra LC050126 1                | 0,18719112 |
| Mustela kathiah NC023210 1            | Cryptoprocta ferox CFC13 1            | 0,18719152 |
| Otocyon megalotis SAF1 2              | Martes melampus NC009678 1            | 0,18719171 |
| Viverricula indica XK891745 1         | Urocyon littoralis catalinae KP129018 | 0,18719286 |
| Lontra canadensis SRR10409165 1       | Leopardus guigna NC028321 1           | 0,18719654 |
| Crocota crocata NC020670 3            | Callorhinus ursinus NC008415 1        | 0,18719681 |
| Martes martes T302 3                  | Lycalopex schuhræe KT448284 1         | 0,18719742 |
| Melogale moschata NC020644 1          | Lycalopex schuhræe KT448284 1         | 0,18719779 |
| Otocyon megalotis SAF1 2              | Civettictis civetta GLC19 1           | 0,18719792 |
| Ursus maritimus NC003428 31           | Canis aureus NC009677 1               | 0,18719819 |
| Meles anakuma NC009677 1              | Helogale parvula SRR7637809 1         | 0,1871987  |
| Zalophus wollebaeki SRR4431565 1      | Ursus arctos EU497665 29              | 0,18719986 |
| Viverricula indica XK891745 1         | Martes foina NC020643 1               | 0,18720053 |
| Paguma larvata PDD511 2               | Chrotogale owstoni T607 1             | 0,18720083 |
| Ursus arctos GU573486 5               | Paradoxurus jerdoni MH464793 1        | 0,18720107 |
| Ursus arctos GU573491 207             | Ichneumia albicauda T603 1            | 0,18720162 |
| Otaria byronia OTAB 1                 | Ichneumia albicauda T603 1            | 0,18720162 |
| Otocyon megalotis SAF1 2              | Felis margarita NC028308 1            | 0,187203   |
| Taxidea taxus NC020646 1              | Speothos venaticus C48 2              | 0,18720335 |
| Melursus ursinus NC009970 2           | Melogale moschata V0735A 1            | 0,18720388 |
| Ictonyx striatus T299 1               | Galerella sanguinea T378 1            | 0,18720393 |
| Otaria byronia OTAB 1                 | Leopardus jacobita NC028322 1         | 0,18720402 |
| Mustela sibirica NC020637 6           | Ailuropoda melanoleuca NC009492 5     | 0,18720515 |
| Ursus maritimus GU573488 Svalbard     | Leopardus wiedii NC028318 1           | 0,18720539 |
| Mungotictis decemlineata NC027828 1   | Helarctos malayanus NC009968 2        | 0,18720606 |
| Mungos mungo MMC7 1                   | Helarctos malayanus NC009968 2        | 0,18720642 |
| Speothos venaticus C48 2              | Felis margarita NC028308 1            | 0,18720683 |
| Helarctos malayanus NC009968 2        | Bassariscus sumichrasti SRX1097850 1  | 0,18720731 |
| Speothos venaticus C48 2              | Otocolobus manul NC028323 1           | 0,18720791 |
| Zalophus wollebaeki SRR4431565 1      | Panthera onca KP202264 2              | 0,18720882 |
| Ursus maritimus NC003428 31           | Prionailurus bengalensis CKM45 20     | 0,1872099  |
| Ursus arctos pruinosus MG066703 3     | Catopuma badia NC028300 1             | 0,18721019 |
| Canis adustus KT448271 1              | Aonyx cinerea NC035814 2              | 0,18721198 |
| Zalophus californianus NC008416 1     | Nyctereutes procyonoides NC013700 3   | 0,18721317 |
| Zalophus wollebaeki SRR4431565 1      | Mephitis mephitis NC020648 1          | 0,18721357 |
| Viverra zibetha T609 1                | Melursus ursinus NC009970 2           | 0,18721515 |
| Ursus arctos EU497665 29              | Ictonyx striatus T299 1               | 0,18721582 |
| Mustela altaica NC021751 1            | Melursus ursinus NC009970 2           | 0,18721633 |
| Prionailurus bengalensis CKM45 20     | Mephitis mephitis NC020648 1          | 0,18721707 |
| Viverricula indica NC025296 2         | Melursus ursinus NC009970 2           | 0,18721783 |
| Panthera onca NC022842 1              | Martes foina NC020643 1               | 0,18721817 |
| Ursus thibetanus laniger MH281753 2   | Prionailurus planiceps NC028312 6     | 0,18721825 |
| Melursus ursinus NC009970 2           | Leopardus tigrinus NC028317 1         | 0,18722035 |
| Gulo gulo NC009685 3                  | Cynictis penicillata T375 1           | 0,1872205  |
| Urva javanica T413 1                  | Gulo gulo NC009685 3                  | 0,18722068 |
| Leopardus guigna NC028321 1           | Galictis vittata T412 1               | 0,18722077 |
| Lycyon peticus NC028427 2             | Helarctos malayanus NC009968 2        | 0,18722261 |
| Ursus americanus JX196366 3           | Lutra lutra LC050126 1                | 0,18722619 |
| Ursus semitorquatus MH464789 1        | Arctocepalus forsteri NC004023 28     | 0,18722621 |
| Paradoxurus jerdoni MH464793 1        | Gulo gulo NC009685 3                  | 0,18722625 |
| Mephitis mephitis NC020648 1          | Melursus ursinus NC009970 2           | 0,18722762 |
| Panthera pardus NC010641 5            | Melogale moschata KP726273 1          | 0,18723455 |
| Zalophus californianus NC008416 1     | Panthera onca NC022842 1              | 0,187235   |

|                                       |                                       |             |
|---------------------------------------|---------------------------------------|-------------|
| Prionodon pardicolor NC024569 2       | Urva javanica/auripunctata NC006835 1 | 0,16197923  |
| Mellivora capensis T370 1             | Lutra lutra LC050126 1                | 0,16198936  |
| Mellivora capensis T370 1             | Lutra lutra NC011358 9                | 0,16198936  |
| Potos flavus T414 1                   | Mustela frenata NC020640 1            | 0,16199714  |
| Salanoia concolor D378 1              | Prionodon linsang ERR2391707 1        | 0,16200498  |
| Mirounga leonina NC008422 1           | Arctodus simus NC011116 1             | 0,162008    |
| Ichneumia albicauda T603 1            | Cynogale bennetti KY117544 1          | 0,16200909  |
| Lynx rufus NC014456 3                 | Cynogale bennetti KY117544 1          | 0,16200949  |
| Parahaena brunnea NC038159 15         | Hemigalus derbyanus MH464791 1        | 0,16204961  |
| Lutra lutra LC050126 1                | Hydrurga leptonyx NC008425 1          | 0,16206732  |
| Mustela frenata NC020640 1            | Hydrurga leptonyx NC008425 1          | 0,16207294  |
| Taxidea taxus NC020646 1              | Pusa hispida NC 008433 1              | 0,16207913  |
| Panthera tigris NC010642 35           | Ichneumia albicauda T603 1            | 0,16208491  |
| Neofelis nebulosa NC008450 3          | Mungos mungo/gambianus SRR7704821 1   | 0,16210647  |
| Cynogale bennetti KY117544 1          | Atilax paludinosus T606 1             | 0,16212928  |
| Lutra lutra LC050126 1                | Lobodon carcinophaga NC008423 1       | 0,16213478  |
| Lobodon carcinophaga NC008423 1       | Arctodus simus NC011116 1             | 0,16215515  |
| Panthera tigris amoyensis NC014770 2  | Crocota crocata NC020670 3            | 0,16216969  |
| Panthera onca NC022842 1              | Crocota crocata NC020670 3            | 0,16217269  |
| Panthera uncia NC010638 1             | Urva javanica/auripunctata NC006835 1 | 0,1621761   |
| Enhydra lutris NC009692 1             | Bassariscus sumichrasti SRX1099089 1  | 0,16219983  |
| Nandinia binotata NC024567 1          | Cystophora cristata NC008427 1        | 0,16220058  |
| Lutra sumatrana NC035810 1            | Hydrurga leptonyx NC008425 1          | 0,16220348  |
| Meles meles T303 3                    | Lobodon carcinophaga NC008423 1       | 0,16220471  |
| Taxidea taxus NC020646 1              | Monachus schauinslandi NC008421 1     | 0,16220872  |
| Paradoxurus jerdoni MH464793 1        | Panthera tigris NC010642 35           | 0,16221906  |
| Martes flavigula NC012141 3           | Bassariscus sumichrasti SRX1099089 1  | 0,16224001  |
| Panthera pardus japonensis KJ866876 8 | Cynogale bennetti KY117544 1          | 0,16224998  |
| Halichoerus grypus NC001602 2         | Arctodus simus NC011116 1             | 0,16226242  |
| Lutra sumatrana NC035810 1            | Lobodon carcinophaga NC008423 1       | 0,16227144  |
| Mustela putorius NC020638 4           | Bassariscus sumichrasti SRX1099089 1  | 0,16227192  |
| Mustela itatsi NC034330 19            | Mellivora capensis T370 1             | 0,16227557  |
| Paradoxurus hermaphroditus NC039591 1 | Panthera uncia NC010638 1             | 0,16228035  |
| Proteles cristata T393 6              | Hemigalus derbyanus MH464791 1        | 0,1623078   |
| Potos flavus T414 1                   | Enhydra lutris NC009692 1             | 0,16232824  |
| Galidia elegans D146 1                | Diplogale hosei MH464790 1            | 0,16233514  |
| Prionodon pardicolor NC024569 2       | Ichneumia albicauda T603 1            | 0,16234732  |
| Panthera tigris NC010642 35           | Bdeogale nigripes GLC15 1             | 0,16235325  |
| Urva semitorquata MH464789 1          | Cynogale bennetti KY117544 1          | 0,16239931  |
| Pusa hispida NC 008433 1              | Mustela erminea T305 2                | 0,16241068  |
| Taxidea taxus NC020646 1              | Phoca largha NC008430 1               | 0,16242206  |
| Proteles cristata T393 6              | Genetta genetta T297 1                | 0,16242509  |
| Potos flavus T414 1                   | Martes flavigula NC012141 3           | 0,16243912  |
| Lutra lutra LC050126 1                | Leptonyctes weddellii NC008424 1      | 0,16245918  |
| Meles meles T303 3                    | Leptonyctes weddellii NC008424 1      | 0,16246407  |
| Mungos mungo/gambianus SRR7704821 1   | Cynogale bennetti KY117544 1          | 0,16246666  |
| Meles leucurus NC039173 4             | Hydrurga leptonyx NC008425 1          | 0,16247374  |
| Panthera uncia NC010638 1             | Bdeogale nigripes GLC15 1             | 0,16248074  |
| Paradoxurus jerdoni MH464793 1        | Panthera uncia KP202269 1             | 0,16248265  |
| Phoca groenlandica NC008429 54        | Arctodus simus NC011116 1             | 0,16248572  |
| Hydrurga leptonyx NC008425 1          | Arctotherium sp NC030174 1            | 0,16248879  |
| Genetta genetta T297 1                | Crocota crocata NC020670 3            | 0,16250154  |
| Felis catus NC001700 2                | Crocota crocata NC020670 3            | 0,16250236  |
| Potos flavus T414 1                   | Lutra sumatrana NC035810 1            | 0,16253142  |
| Urva javanica T413 1                  | Cynogale bennetti KY117544 1          | 0,16253179  |
| Nandinia binotata NC024567 1          | Erygnathus barbatus NC008426 1        | 0,16253704  |
| Martes americana NC020642 1           | Bassariscus sumichrasti SRX1099089 1  | 0,16254199  |
| Potos flavus T414 1                   | Neovison vison NC020641 3             | 0,16254295  |
| Cystophora cristata NC008427 1        | Arctodus simus NC011116 1             | 0,16254598  |
| Suricata suricatta SSM10 1            | Panthera uncia NC010638 1             | 0,16254832  |
| Potos flavus T414 1                   | Martes melampus NC009678 1            | 0,16259699  |
| Cryptoprocta ferox CF13 1             | Chrotogale owstoni T607 1             | 0,16260935  |
| Hyaina hyaena NC020669 1              | Chrotogale owstoni T607 1             | 0,16261248  |
| Martes martes T302 3                  | Bassariscus sumichrasti SRX1099089 1  | 0,16261296  |
| Prionodon pardicolor NC024569 2       | Urva javanica T413 1                  | 0,16261469  |
| Parahaena brunnea NC038159 15         | Chrotogale owstoni T607 1             | 0,16262078  |
| Phoca vitulina NC001325 1             | Arctodus simus NC011116 1             | 0,16262472  |
| Viverra zibetha T609 1                | Proteles cristata T393 6              | 0,16262537  |
| Prionodon linsang ERR2391707 1        | Gallerella sanguinea T378 1           | 0,16262717  |
| Bassariscus sumichrasti SRX1099089 1  | Arctonyx collaris NC020645 1          | 0,162627364 |
| Meles meles T303 3                    | Bassariscus sumichrasti SRX1099089 1  | 0,16267549  |
| Melagale moschata V0735A 1            | Mellivora capensis T370 1             | 0,16272967  |
| Phoca fasciata NC008428 1             | Nandinia binotata NC024567 1          | 0,1627479   |
| Diplogale hosei MH464790 1            | Cryptoprocta ferox CF13 1             | 0,16279256  |
| Potos flavus T414 1                   | Mustela nigripes NC024942 1           | 0,16280419  |
| Mustela frenata NC020640 1            | Cystophora cristata NC008427 1        | 0,16280663  |
| Panthera uncia NC010638 1             | Ichneumia albicauda T603 1            | 0,16281892  |
| Pusa hispida NC 008433 1              | Arctotherium sp NC030174 1            | 0,16282414  |
| Phoca largha NC008430 1               | Arctodus simus NC011116 1             | 0,16282646  |
| Paguma larvata PDD511 2               | Crocota crocata NC020670 3            | 0,16283335  |
| Viverricula indica KX891751 1         | Crocota crocata NC020670 3            | 0,16283996  |
| Panthera onca NC022842 1              | Cynogale bennetti KY117544 1          | 0,16286586  |
| Taxidea taxus NC020646 1              | Mirounga leonina NC008422 1           | 0,162873    |
| Lutra lutra NC011358 9                | Hydrurga leptonyx NC008425 1          | 0,16287532  |
| Neovison vison NC020641 3             | Hydrurga leptonyx NC008425 1          | 0,16288814  |
| Leptonyctes weddellii NC008424 1      | Enhydra lutris NC009692 1             | 0,16293165  |
| Potos flavus T414 1                   | Mustela putorius NC020638 4           | 0,16293865  |
| Pusa caspica NC008431 1               | Mustela erminea T305 2                | 0,16294074  |
| Mustela sibirica AP017394 11          | Bassariscus sumichrasti SRX1099089 1  | 0,16294511  |
| Potos flavus T414 1                   | Mustela nivalis T306 5                | 0,16294675  |
| Panthera leo spelaea KX258452 2       | Urva brachyura KY117547 1             | 0,16295241  |
| Panthera tigris amoyensis NC014770 2  | Urva brachyura KY117547 1             | 0,16295724  |
| Mustela sibirica NC020637 6           | Bassariscus sumichrasti SRX1099089 1  | 0,16301236  |
| Nandinia binotata NC024567 1          | Monachus schauinslandi NC008421 1     | 0,16301587  |
| Paradoxurus jerdoni MH464793 1        | Panthera uncia NC010638 1             | 0,16302128  |
| Felis chaus NC028307 1                | Crocota crocata NC020670 3            | 0,16304204  |
| Paradoxurus jerdoni MH464793 1        | Neofelis nebulosa NC008450 3          | 0,16305529  |
| Potos flavus T414 1                   | Gulo gulo NC009685 3                  | 0,16311198  |
| Melagale moschata NC020644 1          | Mellivora capensis T370 1             | 0,16314046  |
| Mirounga angustirostris SRR10331586 1 | Arctodus simus NC011116 1             | 0,16316584  |
| Prionodon pardicolor NC024569 2       | Helagale parvula SRR7637809 1         | 0,16322006  |
| Crocota crocata NC020670 3            | Catopuma temminckii NC027115 41       | 0,1632404   |
| Proteles cristata T393 6              | Panthera uncia KP202269 1             | 0,1632425   |

|                                      |                                      |            |
|--------------------------------------|--------------------------------------|------------|
| Helarctos malayanus NC009968 2       | Canis lupus familiaris NC002008 1231 | 0,18723607 |
| Ursus arctos AP012576 6              | Acinonyx jubatus NC005212 3          | 0,18723769 |
| Galictis vittata T412 1              | Arctocepalus forsteri NC004023 28    | 0,18723911 |
| Mellivora capensis T370 1            | Bassariscus sumichrasti SRX1099089 1 | 0,18724577 |
| Vulpes lagopus NC026529 3            | Martes americana NC020642 1          | 0,18724708 |
| Mustela itatsi NC034330 19           | Bdeogale nigripes GLC15 1            | 0,18724789 |
| Otaria byronia OTAB 1                | Lontra canadensis SRR10409165 1      | 0,18724865 |
| Canis anthus NC027956 2              | Bdeogale nigripes GLC15 1            | 0,18724902 |
| Tremarctos ornatus NC009969 2        | Eupleres goudotii D128 1             | 0,18725146 |
| Nyctereutes procyonoides NC013700 3  | Mustela putorius NC020638 4          | 0,18725196 |
| Vulpes zerdia KJ603240 1             | Mustela nigripes NC024942 1          | 0,18725273 |
| Nyctereutes procyonoides NC013700 3  | Bassariscus sumichrasti SRX1099089 1 | 0,18725443 |
| Lutrogale perspicillata NC035811 1   | Leopardus geoffroyi NC028320 1       | 0,18725693 |
| Suricata suricatta SSM10 1           | Mustela altaica NC021751 1           | 0,18725695 |
| Otocyon megalotis SAF1 2             | Melagale moschata KP726273 1         | 0,18725814 |
| Martes americana NC020642 1          | Lycan pictus NC028427 2              | 0,18725879 |
| Ursus maritimus GU573488 Svalbard    | Crossarchus plicatipalpus C7R66 1    | 0,18725984 |
| Panthera pardus japonensis KJ866876  | Mustela sibirica NC020637 6          | 0,18725959 |
| Vulpes zerdia KJ603240 1             | Taxidea taxus NC020646 1             | 0,18726029 |
| Vulpes zerdia KJ603240 1             | Felis catus NC001700 2               | 0,1872613  |
| Vulpes zerdia KJ603240 1             | Felis margarita NC028308 1           | 0,18726186 |
| Leopardus jacobita NC028322 1        | Arctocepalus gazella BK010918 1      | 0,18726343 |
| Tremarctos ornatus NC009969 2        | Felis nigripes NC028309 1            | 0,18726431 |
| Callorhinus ursinus NC008415 1       | Arctictis binturong T605 2           | 0,18726434 |
| Phocartos hookeri NC008418 1         | Leptailurus serval NC028316 1        | 0,18726517 |
| Urocyon cinereoargenteus NC026723 2  | Catopuma badia NC028300 1            | 0,18726555 |
| Lycan pictus NC028427 2              | Conepatus chinga NC042596 1          | 0,1872658  |
| Melagale moschata NC020644 1         | Hyaena hyaena NC020669 1             | 0,18726625 |
| Panthera onca KP202264 2             | Mustela altaica NC021751 1           | 0,18726768 |
| Mephitis mephitis NC020648 1         | Lycalopex schuareu KT448284 1        | 0,18726796 |
| Panthera tigris NC010642 35          | Martes melampus NC009678 1           | 0,18726872 |
| Panthera uncia KP202269 1            | Canis mesomelas KT448280 1           | 0,18726899 |
| Prionailurus viverrinus NC028305 1   | Otocyon megalotis SAF1 2             | 0,18727052 |
| Melursus ursinus NC009970 2          | Lutra lutra LC050126 1               | 0,18727072 |
| Vulpes vulpes NC008434 5             | Panthera onca NC022842 1             | 0,18727076 |
| Melagale moschata KP726273 1         | Canis aureus KT448274 1              | 0,18727113 |
| Panthera leo spelaea KX258452 2      | Lutra sumatrana NC035810 1           | 0,18727125 |
| Viverra zibetha T609 1               | Speothos venaticus C48 2             | 0,18727149 |
| Ursus maritimus GU573488 Svalbard    | Leopardus pardalis T262 1            | 0,18727259 |
| Otaria byronia OTAB 1                | Caracal caracal NC028306 1           | 0,18727273 |
| Ursus maritimus NC003428 31          | Leopardus wiedii NC028318 1          | 0,18727274 |
| Canis aureus KT448274 1              | Bassariscus sumichrasti SRX1099089 1 | 0,18727364 |
| Panthera tigris NC010642 35          | Arctocepalus pusillus NC008417 1     | 0,18727379 |
| Ursus arctos GU573486 5              | Paguma larvata PDD511 2              | 0,18727429 |
| Speothos venaticus C48 2             | Prionailurus serval NC028312 6       | 0,18727471 |
| Panthera onca NC022842 1             | Arctocepalus pusillus NC008417 1     | 0,18727674 |
| Urva javanica/auripunctata NC006835  | Canis mesomelas KT448280 1           | 0,18727748 |
| Ursus spelaeus NC011112 8            | Procyon lotor AB462049 4             | 0,18727876 |
| Zalophus californianus NC008416 1    | Helogale parvula SRR7637809 1        | 0,18727957 |
| Panthera tigris NC010642 35          | Martes martes T302 1                 | 0,18727963 |
| Panthera pardus NC010641 5           | Martes flavigula NC012141 3          | 0,18728037 |
| Potos flavus T414 1                  | Canis lupus familiaris NC002008 1231 | 0,18728113 |
| Ursus arctos AP012576 6              | Smilodon populator MF871700 1        | 0,18728229 |
| Ursus maritimus NC003428 31          | Ictonyx striatus T299 1              | 0,18728298 |
| Vulpes lagopus NC026529 3            | Ommatophoca rossii AV377287etc 1     | 0,18728325 |
| Canis lupus familiaris NC002008 1231 | Bdeogale nigripes GLC15 1            | 0,18728341 |
| Ursus thibetanus mupinensis NC008795 | Galictis vittata T412 1              | 0,18728463 |
| Panthera leo NERO 19                 | Ailurus fulgens NC011124 1           | 0,18728526 |
| Nasua nasua NC020647 1               | Monachus monachus NC044972 5         | 0,18728647 |
| Ursus arctos isabellinus 1885 2      | Canis aureus KT448274 1              | 0,18728647 |
| Panthera leo spelaea KX258452 2      | Ictonyx striatus T299 1              | 0,18728934 |
| Ursus arctos GU573486 5              | Arctictis binturong T605 2           | 0,18728946 |
| Ursus arctos AP012576 6              | Martes foina NC020643 1              | 0,18729062 |
| Panthera leo NERO 19                 | Lutra sumatrana NC035810 1           | 0,18729068 |
| Viverricula indica KX891745 1        | Arctocepalus forsteri NC004023 28    | 0,18729183 |
| Ursus thibetanus thibetanus NC011118 | Galictis vittata T412 1              | 0,18729272 |
| Lycalopex schuareu KT448284 1        | Lutra lutra LC050126 1               | 0,18729736 |
| Melursus ursinus NC009970 2          | Arctictis binturong T605 2           | 0,18729867 |
| Canis lupus chanco NC010340 4        | Ailurus fulgens styani NC009691 1    | 0,18730004 |
| Lycalopex schuareu KT448284 1        | Cynictis penicillata T375 1          | 0,18730301 |
| Ursus americanus JX196366 3          | Puma concolor NC016470 22            | 0,18730488 |
| Ursus americanus JX196366 3          | Prionailurus bengalensis NC028301 12 | 0,18730582 |
| Paradoxurus hermaphroditus NC039591  | Tapirus terrestris T358              | 0,18730687 |
| Melagale moschata V0735A 1           | Urva javanica T413 1                 | 0,18731289 |
| Mustela eversmannii NC028013 1       | Atilax paludinosus T606 1            | 0,18731353 |
| Mustela sibirica NC020637 6          | Cynictis penicillata T375 1          | 0,18731454 |
| Eupleres goudotii D128 1             | Arctocepalus townsendi NC008420 1    | 0,18731497 |
| Vulpes corsac NC023958 1             | Melagale moschata KP726273 1         | 0,18731524 |
| Martes americana NC020642 1          | Galidia elegans D146 1               | 0,18731526 |
| Nyctereutes procyonoides NC013700 3  | Martes zibellina NC011579 39         | 0,18731569 |
| Neophoca cinerea NC008419 1          | Bdeogale nigripes GLC15 1            | 0,18731707 |
| Panthera leo NERO 19                 | Canis aureus KT448274 1              | 0,18731773 |
| Mungotictis decemlineata NC027828    | Bassariscus sumichrasti SRX1099089 1 | 0,18731884 |
| Mustela sibirica NC020637 6          | Mungotictis decemlineata NC027828 2  | 0,18731868 |
| Vulpes lagopus NC026529 3            | Mustela kathiah NC023210 1           | 0,18731907 |
| Viverra tangalunga MH464792 1        | Mungotictis decemlineata NC027828 2  | 0,18731967 |
| Lynx rufus NC014456 3                | Tapirus terrestris T358              | 0,18732096 |
| Galidia elegans D146 1               | Arctocepalus pusillus NC008417 1     | 0,18732122 |
| Paguma larvata PDD511 2              | Arctocepalus gazella BK010918 1      | 0,18732132 |
| Otaria byronia OTAB 1                | Bdeogale nigripes GLC15 1            | 0,18732214 |
| Panthera pardus japonensis KJ866876  | Meles leucurus NC039173 4            | 0,18732235 |
| Mustela nivalis T306 5               | Helagale parvula SRR7637809 1        | 0,18732393 |
| Spilogale putorius NC010497 1        | Diplogale hosei MH464790 1           | 0,18732536 |
| Enhydra lutris NC009692 1            | Chrysoyon brachyurus NC024172 1      | 0,18732575 |
| Phocartos hookeri NC008418 1         | Genetta servalina NC024568 2         | 0,18732695 |
| Melagale moschata KP726273 1         | Lycan pictus NC028427 2              | 0,18732743 |
| Lutrogale perspicillata NC035811 1   | Cryptoprocta ferox CF13 1            | 0,18732791 |
| Puma concolor NC016470 22            | Arctocepalus australis MG023139 1    | 0,18732795 |
| Profelis aurata NC028299 1           | Mustela itatsi NC034330 19           | 0,18732814 |
| Otocyon megalotis SAF1 2             | Mustela erminea T305 2               | 0,18732814 |
| Panthera pardus japonensis KJ866876  | Canis latrans NC008093 7             | 0,18732971 |
| Salanoia concolor D378 1             | Lycan pictus NC028427 2              | 0,18733019 |
| Neophoca cinerea NC008419 1          | Genetta genetta T297 1               | 0,18733057 |

|                                        |                                       |            |
|----------------------------------------|---------------------------------------|------------|
| Profelis aurata NC028299 1             | Crocota crocata NC020670 3            | 0,16324496 |
| Gulo gulo NC009685 3                   | Bassariscus sumichrasti SRX1099089 1  | 0,16325185 |
| Potos flavus T414 1                    | Lutra lutra LC050126 1                | 0,16326971 |
| Mustela frenata NC020640 1             | Leptonychotes weddellii NC008424 1    | 0,16327555 |
| Prionodon linsang ERR2391707 1         | Galidictis fasciata DM333 1           | 0,16328451 |
| Phoca largha NC008430 1                | Mustela erminea T305 2                | 0,16328943 |
| Lutra lutra LC050126 1                 | Bassariscus sumichrasti SRX1099089 1  | 0,16334312 |
| Nandinia binotata NC024567 1           | Mirounga leonina NC008422 1           | 0,16334501 |
| Pusa sibirica NC008432 2               | Arctotherium sp NC030174 1            | 0,16335051 |
| Mustela kathiah NC023210 1             | Mellivora capensis T370 1             | 0,16335227 |
| Prionodon pardicolor NC024569 2        | Galidia elegans D146 1                | 0,16335899 |
| Prionodon linsang ERR2391707 1         | Eupleres goudotii D128 1              | 0,16340952 |
| Mustela erminea T305 2                 | Erigonathus barbatus NC008426 1       | 0,16341078 |
| Cynogale bennetti KY117544 1           | Crossarchus platycephalus C7R66 1     | 0,16341195 |
| Lobodon carcinophaga NC008423 1        | Enhydra lutris NC009692 1             | 0,16341496 |
| Mustela nigripes NC024942 1            | Bassariscus sumichrasti SRX1099089 1  | 0,16341607 |
| Meles leucurus NC039173 4              | Bassariscus sumichrasti SRX1099089 1  | 0,16341631 |
| Tremarctos ornatus NC009969 2          | Hydrurga leptonyx NC008425 1          | 0,16341994 |
| Taxidea taxus NC020646 1               | Phoca groenlandica NC008429 54        | 0,16342448 |
| Viverricula indica KX891751 1          | Proteles cristata T393 6              | 0,16343342 |
| Leptonychotes weddellii NC008424 1     | Arctonyx collaris NC020645 1          | 0,16342724 |
| Prionodon linsang ERR2391707 1         | Crossarchus platycephalus C7R66 1     | 0,16347967 |
| Hydrurga leptonyx NC008425 1           | Arctonyx collaris NC020645 1          | 0,16348115 |
| Taxidea taxus NC020646 1               | Pusa caspica NC008431 1               | 0,16348666 |
| Taxidea taxus NC020646 1               | Procyon lotor AB462046 3              | 0,16349141 |
| Phoca fasciata NC008428 1              | Arctotherium sp NC030174 1            | 0,16349167 |
| Martes melampus NC009678 1             | Leptonychotes weddellii NC008424 1    | 0,16350612 |
| Lutra lutra NC011358 9                 | Lobodon carcinophaga NC008423 1       | 0,16354857 |
| Phoca fasciata NC008428 1              | Lutra sumatrana NC035810 1            | 0,16354911 |
| Potos flavus T414 1                    | Martes martes T302 3                  | 0,16355054 |
| Taxidea taxus NC020646 1               | Procyon lotor AB462049 4              | 0,16355848 |
| Mellivora capensis T370 1              | Gulo gulo NC009685 3                  | 0,16358627 |
| Leptonychotes weddellii NC008424 1     | Homotherium latidens MF871702 3       | 0,16358867 |
| Meles leucurus NC039173 4              | Leptonychotes weddellii NC008424 1    | 0,1636083  |
| Mustela erminea T305 2                 | Mirounga leonina NC008422 1           | 0,16361268 |
| Panthera leo NERO 19                   | Crocota crocata NC020670 3            | 0,1636152  |
| Martes zibellina NC011579 39           | Bassariscus sumichrasti SRX1099089 1  | 0,16361898 |
| Prionodon linsang ERR2391707 1         | Mungotictis decemlineata NC027828 1   | 0,1636207  |
| Mustela erminea T305 2                 | Mirounga angustirostris SRR10331586 1 | 0,16362475 |
| Panthera tigris NC010642 35            | Cynictis penicillata T375 1           | 0,16363084 |
| Hydrurga leptonyx NC008425 1           | Hemigalus derbyanus MH464791 1        | 0,16365996 |
| Lutra lutra NC011358 9                 | Leptonychotes weddellii NC008424 1    | 0,16367052 |
| Potos flavus T414 1                    | Arctonyx collaris NC020645 1          | 0,16367693 |
| Martes melampus NC009678 1             | Hydrurga leptonyx NC008425 1          | 0,16368429 |
| Hyaena hyaena NC020669 1               | Arctictis binturong T605 2            | 0,16371438 |
| Potos flavus T414 1                    | Meles meles T303 3                    | 0,16374472 |
| Pusa sibirica NC008432 2               | Mustela erminea T305 2                | 0,16374901 |
| Lobodon carcinophaga NC008423 1        | Arctonyx collaris NC020645 1          | 0,16375102 |
| Mustela nigripes NC024942 1            | Mellivora capensis T370 1             | 0,16375561 |
| Hydrurga leptonyx NC008425 1           | Crossarchus platycephalus C7R66 1     | 0,16375811 |
| Panthera tigris NC010642 35            | Urva brachyura KY117547 1             | 0,16376531 |
| Viverra zibetha T609 1                 | Crocota crocata NC020670 3            | 0,16378178 |
| Panthera leo spelaea KX28452 2         | Crocota crocata NC020670 3            | 0,16378339 |
| Paradoxurus hermaphroditus NC039591 1  | Cryptoprocta ferox CFC13 1            | 0,16382734 |
| Martes foina NC020643 1                | Bassariscus neblina SRX1097850 1      | 0,16382873 |
| Mellivora capensis T370 1              | Lontra canadensis SRR10409165 1       | 0,16387375 |
| Procyon lotor AB462046 3               | Meles leucurus NC039173 4             | 0,16388382 |
| Pusa hispida NC 008433 1               | Lutra sumatrana NC035810 1            | 0,16388978 |
| Potos flavus T414 1                    | Martes foina NC020643 1               | 0,16389446 |
| Panthera pardus japonensis KJ866876 8  | Crocota crocata NC020670 3            | 0,16391444 |
| Potos flavus T414 1                    | Mustela sibirica NC020637 6           | 0,16394833 |
| Potos flavus T414 1                    | Martes americana NC020642 1           | 0,16394895 |
| Potos flavus T414 1                    | Erigonathus barbatus NC008426 1       | 0,1639528  |
| Cystophora cristata NC008427 1         | Arctotherium sp NC030174 1            | 0,1639564  |
| Erigonathus barbatus NC008426 1        | Arctotherium sp NC030174 1            | 0,16395663 |
| Paradoxurus hermaphroditus NLNC 1      | Hyaena hyaena NC020669 1              | 0,16399053 |
| Panthera onca KP202264 2               | Cynogale bennetti KY117544 1          | 0,16400127 |
| Neofelis nebulosa NC008450 3           | Crocota crocata NC020670 3            | 0,16400954 |
| Mustela sibirica AP017394 11           | Lobodon carcinophaga NC008423 1       | 0,16402507 |
| Paradoxurus jerdoni MH464793 1         | Cryptoprocta ferox CFC13 1            | 0,16402936 |
| Taxidea taxus NC020646 1               | Phoca vitulina NC001325 1             | 0,16403782 |
| Lutra sumatrana NC035810 1             | Leptonychotes weddellii NC008424 1    | 0,164076   |
| Potos flavus T414 1                    | Meles leucurus NC039173 4             | 0,16408078 |
| Mustela itatsi NC034330 19             | Bassariscus sumichrasti SRX1099089 1  | 0,16408946 |
| Pusa hispida NC 008433 1               | Lutra lutra LC050126 1                | 0,16409068 |
| Neovison vison NC020641 3              | Leptonychotes weddellii NC008424 1    | 0,1640912  |
| Phoca vitulina NC001325 1              | Mustela erminea T305 2                | 0,16409741 |
| Phoca largha NC008430 1                | Arctotherium sp NC030174 1            | 0,16410254 |
| Panthera leo NERO 19                   | Cynogale bennetti KY117544 1          | 0,16410547 |
| Taxidea taxus NC020646 1               | Monachus monachus NC044972 5          | 0,16412252 |
| Tremarctos ornatus NC009969 2          | Leptonychotes weddellii NC008424 1    | 0,16414636 |
| Viverra tangalunga MH464792 1          | Leptonychotes weddellii NC008424 1    | 0,164149   |
| Pusa caspica NC008431 1                | Arctotherium sp NC030174 1            | 0,16415845 |
| Taxidea taxus NC020646 1               | Mirounga angustirostris SRR10331586 1 | 0,16416419 |
| Xenogale naso C07XAR110 1              | Cynogale bennetti KY117544 1          | 0,1642168  |
| Lobodon carcinophaga NC008423 1        | Arctotherium sp NC030174 1            | 0,16423906 |
| Martes flavigula NC012141 3            | Leptonychotes weddellii NC008424 1    | 0,1642516  |
| Mustela erminea T305 2                 | Halichoerus grypus NC001602 2         | 0,16426598 |
| Taxidea taxus NC020646 1               | Halichoerus grypus NC001602 2         | 0,16427383 |
| Panthera pardus NC010641 5             | Crocota crocata NC020670 3            | 0,16428968 |
| Ursus thibetanus thibetanus NC011118 4 | Hydrurga leptonyx NC008425 1          | 0,16432558 |
| Mirounga leonina NC008422 1            | Meles meles T303 3                    | 0,16435049 |
| Suricata suricatta SSM10 1             | Cynogale bennetti KY117544 1          | 0,16435182 |
| Lutra lutra NC011358 9                 | Bassariscus sumichrasti SRX1099089 1  | 0,16435239 |
| Mustela eversmanni NC028013 1          | Bassariscus sumichrasti SRX1099089 1  | 0,16435824 |
| Phoca largha NC008430 1                | Lutra sumatrana NC035810 1            | 0,1643624  |
| Martes martes T302 3                   | Hydrurga leptonyx NC008425 1          | 0,16436751 |
| Ursus thibetanus thibetanus NC011118 4 | Phoca groenlandica NC008429 54        | 0,16438456 |
| Proteles cristata T393 6               | Neofelis nebulosa NC008450 3          | 0,1644146  |
| Pusa caspica NC008431 1                | Nandinia binotata NC024567 1          | 0,1644223  |
| Potos flavus T414 1                    | Martes pennanti NC020664 16           | 0,16442305 |
| Prionodon linsang ERR2391707 1         | Galidia elegans D146 1                | 0,16442849 |
| Panthera uncia KP202269 1              | Cynogale bennetti KY117544 1          | 0,16447318 |

|                                      |                                      |            |
|--------------------------------------|--------------------------------------|------------|
| Puma yagouaroundi NC028311 1         | Lontra canadensis SRR10409165 1      | 0,18733059 |
| Lontra canadensis SRR10409165 1      | Felis chaus NC028307 1               | 0,18733123 |
| Hemigalus derbyanus MH464791 1       | Aonyx cinerea NC035814 2             | 0,18733163 |
| Neophoca cinerea NC008419 1          | Felis margarita NC028308 1           | 0,18733183 |
| Ursus spelaeus EU327344 13           | Conepatus chinga NC042596 1          | 0,1873319  |
| Ursus maritimus NC003428 31          | Hyaena hyaena NC020669 1             | 0,18733206 |
| Arctocepalus townsendi NC008420 1    | Ailuropoda melanoleuca NC009492 5    | 0,18733211 |
| Arctocepalus australis MG023139 1    | Ailuropoda melanoleuca NC009492 5    | 0,18733297 |
| Panthera onca KP202264 2             | Bassariscus sumichrasti SRX1099089 1 | 0,18733361 |
| Lutrogale perspicillata NC035811 1   | Felis margarita NC028308 1           | 0,18733422 |
| Spilogale putorius NC010497 1        | Smilodon populator MF871700 1        | 0,18733433 |
| Procyon lotor AB462046 3             | Pardofelis marmorata NLN3 2          | 0,18733451 |
| Felis chaus NC028307 1               | Aonyx cinerea NC035814 2             | 0,18733551 |
| Felis catus NC001700 2               | Arctotherium sp NC030174 1           | 0,18733566 |
| Ursus maritimus GU573488 Svalbard    | Paradoxurus jerdoni MH464793 1       | 0,1873358  |
| Mustela nivalis T306 5               | Cryptoprocta ferox CFC13 1           | 0,18733586 |
| Panthera onca NC022842 1             | Martes melampus NC009678 1           | 0,18733747 |
| Mungos mungo MMC7 1                  | Galictis vittata T412 1              | 0,1873382  |
| Potos flavus T414 1                  | Odobenus rosmarus NC004029 29        | 0,18733881 |
| Panthera pardus japonensis KJ866876  | Neovison vison NC020641 3            | 0,18733901 |
| Parahyaena brunnea NC038159 15       | Mustela nivalis T306 5               | 0,18733941 |
| Ursus arctos GU573491 207            | Leopardus pardalis NC028315 1        | 0,18733963 |
| Ursus thibetanus thibetanus NC011118 | Prionodon linsang ERR2391707 1       | 0,18734014 |
| Ursus spelaeus NC011112 8            | Mungos mungo MMC7 1                  | 0,18734019 |
| Ursus thibetanus mupinensis NC00875  | Pardofelis marmorata NLN3 2          | 0,18734086 |
| Mustela altaica NC021751 1           | Chrysocyon brachyurus NC024172 1     | 0,18734093 |
| Ursus arctos GU573491 207            | Profelis aurata NC028299 1           | 0,18734127 |
| Ursus arctos EU497665 29             | Prionailurus rubiginosus NC028304 2  | 0,18734132 |
| Panthera onca KP202264 2             | Martes foina NC020643 1              | 0,18734144 |
| Ursus maritimus GU573488 Svalbard    | Prionailurus bengalensis NC028301 12 | 0,18734154 |
| Ursus arctos pruinosus MG06703 3     | Profelis aurata NC028299 1           | 0,18734165 |
| Ursus maritimus GU573488 Svalbard    | Caracal caracal NC028306 1           | 0,18734165 |
| Ursus thibetanus formosanus NC0093   | Canis anthus NC027956 2              | 0,18734229 |
| Ursus arctos EU497665 29             | Catopuma badia NC028300 1            | 0,18734474 |
| Canis aureus KT448274 1              | Ailuurus fulgens NC011124 1          | 0,18734601 |
| Ursus spelaeus NC011112 8            | Hyaena hyaena NC020669 1             | 0,18734603 |
| Tremarctos ornatus NC009969 2        | Arctictis binturong T605 2           | 0,18734717 |
| Genetta servalina NC024568 2         | Galictis vittata T412 1              | 0,18734851 |
| Ursus arctos AP012576 6              | Paradoxurus jerdoni MH464793 1       | 0,18734895 |
| Viverricula indica NC025296 2        | Ursus arctos AP012576 6              | 0,18735136 |
| Ursus thibetanus formosanus NC0093   | Prionailurus viverrinus NC028305 1   | 0,18735152 |
| Panthera tigris NC010642 35          | Ictonyx striatus T299 1              | 0,18735258 |
| Puma yagouaroundi NC028311 1         | Galictis vittata T412 1              | 0,18735327 |
| Procyon lotor AB462046 3             | Urva javanica/aruopunctata NC006835  | 0,18735552 |
| Vulpes vulpes NC008434 5             | Panthera leo NERO 19                 | 0,18735823 |
| Helogale parvula SRR7637809 1        | Eumetopias jubatus NC004030 10       | 0,18736005 |
| Paguma larvata PDS11 2               | Gulo gulo NC009685 3                 | 0,1873612  |
| Meles leucurus NC039173 4            | Cuon alpinus NC013445 3              | 0,18736176 |
| Gulo gulo NC009685 3                 | Galerella sanguinea T378 1           | 0,18736662 |
| Catopuma badia NC028300 1            | Arctocepalus forsteri NC040023 28    | 0,18736914 |
| Panthera pardus NC010641 5           | Melogale moschata V0735A 1           | 0,18736933 |
| Otocyon megalotis SAF 1 2            | Ommatophoca rossii AY377287etc 1     | 0,18737255 |
| Pusa sibirica NC008432 2             | Tapirus terrestris T358              | 0,18737577 |
| Ursus arctos NC028313 1              | Cuon alpinus NC013445 3              | 0,18737714 |
| Panthera leo NERO 19                 | Ictonyx striatus T299 1              | 0,18737775 |
| Suricata suricatta SSM10 1           | Callorhinus ursinus NC008415 1       | 0,187379   |
| Vulpes vulpes NC008434 5             | Martes melampus NC009678 1           | 0,18738094 |
| Mustela nigripes NC024942 1          | Helogale parvula SRR7637809 1        | 0,18738104 |
| Mungos mungo MMC7 1                  | Ailuurus fulgens NC011124 1          | 0,18738152 |
| Mustela sibirica NC020637 6          | Bdeogale nigripes GLC15 1            | 0,18738174 |
| Attilax paludinosus T606 1           | Arctocepalus australis MG023139 1    | 0,18738216 |
| Eupleres goudotii D128 1             | Arctocepalus australis MG023139 1    | 0,1873828  |
| Tremarctos ornatus NC009969 2        | Mungotictis decemlineata NC027828 1  | 0,18738306 |
| Mungotictis decemlineata NC027828 1  | Callorhinus ursinus NC008415 1       | 0,18738431 |
| Procyon lotor AB462046 3             | Mungos mungo/gambianus SRR77048      | 0,18738577 |
| Panthera pardus NC010641 5           | Ictonyx striatus T299 1              | 0,18738581 |
| Puma concolor NC016470 22            | Conepatus chinga NC042596 1          | 0,18738648 |
| Vulpes ferrillata NC027935 1         | Mustela sibirica NC020637 6          | 0,18738659 |
| Ichneumia albicauda T603 1           | Enhydra lutris NC009692 1            | 0,18738672 |
| Vulpes ferrillata NC027935 1         | Genetta abyssinica MG489822 1        | 0,18738745 |
| Otocolobus manul NC028323 1          | Conepatus chinga NC042596 1          | 0,18738969 |
| Procyon lotor AB462046 3             | Lycalopex sechurae KT448284 1        | 0,18738975 |
| Viverricula indica KX891745 1        | Urocyon cinereoargenteus NC026723 2  | 0,18739486 |
| Profelis aurata NC028299 1           | Mustela putorius NC020638 4          | 0,18739523 |
| Vulpes ferrillata NC027935 1         | Pardofelis marmorata NLN3 2          | 0,18739557 |
| Proteles cristata T393 6             | Meles leucurus NC039173 4            | 0,18739623 |
| Felis margarita NC028308 1           | Arctocepalus gazella BK010918 1      | 0,1873965  |
| Parahyaena brunnea NC038159 15       | Meles leucurus NC039173 4            | 0,18739665 |
| Vulpes zerda KJ603240 1              | Puma yagouaroundi NC028311 1         | 0,18739715 |
| Prionailurus viverrinus NC028305 1   | Arctocepalus forsteri KT693377 17    | 0,18739772 |
| Proteles cristata T393 6             | Martes melampus NC009678 1           | 0,18739741 |
| Salanoia concolor D378 1             | Mustela altaica NC021751 1           | 0,18739749 |
| Ursus thibetanus mupinensis NC00875  | Prionodon linsang ERR2391707 1       | 0,18739757 |
| Salanoia concolor D378 1             | Poecilogale albinucha T602 1         | 0,18739907 |
| Odobenus rosmarus NC004029 29        | Arctonyx collaris NC020645 1         | 0,18739919 |
| Speothos venaticus C48 2             | Mustela itatsi NC034330 19           | 0,18740013 |
| Chrysocyon brachyurus NC024172 1     | Attilax paludinosus T606 1           | 0,18740016 |
| Galerella sanguinea T378 1           | Arctotherium sp NC030174 1           | 0,18740188 |
| Odobenus rosmarus NC004029 29        | Lutra lutra LC050126 1               | 0,18740189 |
| Martes zibellina NC011579 39         | Ailuropoda melanoleuca NC009492 5    | 0,18740191 |
| Ursus arctos NC020643 1              | Canis mesomelas KT448280 1           | 0,18740192 |
| Profelis aurata NC028299 1           | Poecilogale albinucha T602 1         | 0,18740265 |
| Ursus maritimus NC003428 31          | Paradoxurus jerdoni MH464793 1       | 0,1874031  |
| Parahyaena brunnea NC038159 15       | Martes martes T302 3                 | 0,18740346 |
| Ursus maritimus NC003428 31          | Genetta genetta T297 1               | 0,18740419 |
| Ursus arctos GU573491 207            | Paguma larvata PDS11 2               | 0,1874042  |
| Martes pennanti NC020664 16          | Lycalopex sechurae KT448284 1        | 0,18740511 |
| Panthera leo NERO 19                 | Gulo gulo NC009685 3                 | 0,18740617 |
| Urva brachyura KY117547 1            | Canis aureus KT448274 1              | 0,18740728 |
| Ursus arctos GU573491 207            | Puma yagouaroundi NC028311 1         | 0,18740872 |
| Ursus maritimus NC003428 31          | Leptailurus serval NC028316 1        | 0,18740915 |
| Ursus arctos GU573491 207            | Catopuma badia NC028300 1            | 0,18741167 |
| Ursus maritimus GU573488 Svalbard    | Prionailurus bengalensis CKM45 20    | 0,18741196 |

|                                        |                                       |            |
|----------------------------------------|---------------------------------------|------------|
| Lutra lutra LC050126 1                 | Cystophora cristata NC008427 1        | 0,16448307 |
| Mustela sibirica AP017394 11           | Leptonychotes weddellii NC008424 1    | 0,16448505 |
| Pusa sibirica NC008432 2               | Nandinia binotata NC024567 1          | 0,16448963 |
| Phoca groenlandica NC008429 54         | Arctotherium sp NC030174 1            | 0,16450202 |
| Phoca vitulina NC001325 1              | Arctotherium sp NC030174 1            | 0,16450677 |
| Mirounga leonina NC008422 1            | Meles leucurus NC039173 4             | 0,16455218 |
| Taxidea taxus NC020646 1               | Nandinia binotata NC024567 1          | 0,16456009 |
| Phoca groenlandica NC008429 54         | Mustela erminea T305 2                | 0,16456583 |
| Nandinia binotata NC024567 1           | Mirounga angustirostris SRR10331586 1 | 0,16456906 |
| Puma yagouaroundi NC028311 1           | Hydrurga leptonyx NC008425 1          | 0,16457599 |
| Leopardus pardalis T262 1              | Hydrurga leptonyx NC008425 1          | 0,16457821 |
| Suricata suricatta SSM10 1             | Neofelis nebulosa NC008450 3          | 0,16459966 |
| Mustela erminea T305 2                 | Cystophora cristata NC008427 1        | 0,16462363 |
| Melogale moschata NC020644 1           | Bassariscus sumichrasti SRX1099089 1  | 0,16463256 |
| Taxidea taxus NC020646 1               | Mellivora capensis T370 1             | 0,16464491 |
| Potos flavus T414 1                    | Mellivora capensis T370 19            | 0,16468996 |
| Potos flavus T414 1                    | Martes zibellina NC011579 39          | 0,16468979 |
| Phoca fasciata NC008428 1              | Lutra lutra LC050126 1                | 0,16469155 |
| Neofelis nebulosa NC008450 3           | Urva javanica/auropunctata NC006835 1 | 0,16469885 |
| Mustela frenata NC020640 1             | Mirounga angustirostris SRR10331586 1 | 0,16470154 |
| Prionailurus bengalensis NC028301 12   | Leptonychotes weddellii NC008424 1    | 0,16470167 |
| Prionodon pardicolor NC024569 2        | Cryptoprocta ferox CFC13 1            | 0,16471747 |
| Hyaena hyaena NC020669 1               | Diplogale hosei MH464790 1            | 0,16472508 |
| Ursus thibetanus laniger MH281753 2    | Hydrurga leptonyx NC008425 1          | 0,16472709 |
| Melogale moschata KP726273 1           | Mellivora capensis T370 1             | 0,16474864 |
| Potos flavus T414 1                    | Lutra lutra LC011358 9                | 0,16475028 |
| Erignathus barbatus NC008426 1         | Arctonx collaris NC020645 1           | 0,16475375 |
| Homotherium latidens MF871702 3        | Canis adustus KT448271 1              | 0,16475984 |
| Meles leucurus NC039173 4              | Lobodon carcinophaga NC008423 1       | 0,16476332 |
| Phoca vitulina NC001325 1              | Lutra sumatrana NC035810 1            | 0,16476628 |
| Tremarctos ornatus NC009969 2          | Lobodon carcinophaga NC008423 1       | 0,16476656 |
| Phoca groenlandica NC008429 54         | Nandinia binotata NC024567 1          | 0,16476795 |
| Prionailurus bengalensis NC028301 12   | Hydrurga leptonyx NC008425 1          | 0,16477814 |
| Lobodon carcinophaga NC008423 1        | Aonyx cinerea NC035814 2              | 0,16477862 |
| Leopardus pardalis NC028315 1          | Hydrurga leptonyx NC008425 1          | 0,16478004 |
| Ursus spelaeus NC011112 8              | Hydrurga leptonyx NC008425 1          | 0,16479692 |
| Neofelis nebulosa NC008450 3           | Urva javanica T413 1                  | 0,16480035 |
| Lutra sumatrana NC035810 1             | Cystophora cristata NC008427 1        | 0,16482061 |
| Phoca largha NC008430 1                | Lutra lutra LC050126 1                | 0,16483316 |
| Mustela itatsi NC034330 19             | Lobodon carcinophaga NC008423 1       | 0,16483325 |
| Taxidea taxus NC020646 1               | Pusa sibirica NC008432 2              | 0,16483332 |
| Paradoxurus jerdoni MH464793 1         | Hyaena hyaena NC020669 1              | 0,16484281 |
| Neofelis nebulosa NC008450 3           | Cynictis penicillata T375 1           | 0,16486755 |
| Martes flavigula NC012141 3            | Lobodon carcinophaga NC008423 1       | 0,16486821 |
| Mustela itatsi NC034330 19             | Leptonychotes weddellii NC008424 1    | 0,16488978 |
| Pusa hispida NC 008433 1               | Nandinia binotata NC024567 1          | 0,16490038 |
| Pusa hispida NC 008433 1               | Mustela frenata NC020640 1            | 0,16490251 |
| Nandinia binotata NC024567 1           | Monachus monachus NC044972 5          | 0,16492492 |
| Tremarctos ornatus NC009969 2          | Erignathus barbatus NC008426 1        | 0,16495466 |
| Martes martes T302 3                   | Leptonychotes weddellii NC008424 1    | 0,16495962 |
| Leptonychotes weddellii NC008424 1     | Crossarchus platycephalus C7R66 1     | 0,16496095 |
| Martes martes T302 3                   | Erignathus barbatus NC008426 1        | 0,16496111 |
| Potos flavus T414 1                    | Bassariscus neblina SRX1097850 1      | 0,16496253 |
| Mustela nivalis T306 5                 | Bassariscus sumichrasti SRX1099089 1  | 0,16497366 |
| Lobodon carcinophaga NC008423 1        | Homotherium latidens MF871702 3       | 0,1649828  |
| Proteles cristata T393 6               | Panthera uncia NC010638 1             | 0,16499342 |
| Ursus spelaeus NC011112 8              | Lobodon carcinophaga NC008423 1       | 0,16499856 |
| Hydrurga leptonyx NC008425 1           | Genetta abyssinica MG489822 1         | 0,16500244 |
| Mustela frenata NC020640 1             | Mirounga leonina NC008422 1           | 0,16502495 |
| Monachus schauinslandi NC008421 1      | Arctonx collaris NC020645 1           | 0,16503069 |
| Mustela sibirica AP017394 11           | Hydrurga leptonyx NC008425 1          | 0,16503476 |
| Viverra tangalunga MH464792 1          | Lobodon carcinophaga NC008423 1       | 0,16503479 |
| Ursus thibetanus mupinensis NC008753 2 | Phoca groenlandica NC008429 54        | 0,16504684 |
| Ursus thibetanus laniger MH281753 2    | Phoca groenlandica NC008429 54        | 0,16505592 |
| Panthera uncia KP202269 1              | Crocuta crocuta NC020670 3            | 0,16505899 |
| Martes flavigula NC012141 3            | Hydrurga leptonyx NC008425 1          | 0,16507086 |
| Mellivora capensis T370 1              | Enhydra lutris NC009692 1             | 0,16508514 |
| Meles meles T303 3                     | Erignathus barbatus NC008426 1        | 0,16509068 |
| Mustela sibirica NC020637 6            | Lobodon carcinophaga NC008423 1       | 0,16510229 |
| Panthera leo spelaeus KX258452 2       | Cynogale bennetti KY117544 1          | 0,16515379 |
| Phoca fasciata NC008428 1              | Lutra lutra LC011358 9                | 0,16516221 |
| Hydrurga leptonyx NC008425 1           | Fossa fossana D350 1                  | 0,16517283 |
| Leptonychotes weddellii NC008424 1     | Leopardus pardalis T262 1             | 0,16517442 |
| Prionailurus rubiginosus NC028304 2    | Hydrurga leptonyx NC008425 1          | 0,16518258 |
| Parahyaena brunnea NC038159 15         | Paradoxurus hermaphroditus NLCN 1     | 0,16518229 |
| Taxidea taxus NC020646 1               | Ommatophoca rossii AY377287etc 1      | 0,16522273 |
| Mustela putorius NC020638 4            | Leptonychotes weddellii NC008424 1    | 0,16522597 |
| Leptonychotes weddellii NC008424 1     | Fossa fossana D350 1                  | 0,16523027 |
| Suricata suricatta SSM10 1             | Prionodon linsang ERR2391707 1        | 0,16523027 |
| Meles anakuma NC009677 1               | Hydrurga leptonyx NC008425 1          | 0,16523181 |
| Phoca fasciata NC008428 1              | Mustela erminea T305 2                | 0,16523854 |
| Paradoxurus hermaphroditus NC039591 1  | Hyaena hyaena NC020669 1              | 0,16523877 |
| Phoca vitulina NC001325 1              | Mustela frenata NC020640 1            | 0,16524273 |
| Phoca vitulina NC001325 1              | Nandinia binotata NC024567 1          | 0,1652444  |
| Meles anakuma NC009677 1               | Leptonychotes weddellii NC008424 1    | 0,16528928 |
| Potos flavus T414 1                    | Mustela sibirica AP017394 11          | 0,16529448 |
| Cystophora cristata NC008427 1         | Bassariscus sumichrasti SRX1099089 1  | 0,16529997 |
| Potos flavus T414 1                    | Mustela altaica NC021751 1            | 0,16530356 |
| Mustela sibirica AP017394 11           | Mellivora capensis T370 1             | 0,16530371 |
| Mustela putorius NC020638 4            | Lobodon carcinophaga NC008423 1       | 0,16530442 |
| Melursus ursinus NC009970 2            | Cystophora cristata NC008427 1        | 0,16531868 |
| Martes foina NC020643 1                | Lobodon carcinophaga NC008423 1       | 0,1653195  |
| Prionailurus bengalensis CMM45 20      | Hydrurga leptonyx NC008425 1          | 0,16532083 |
| Mustela frenata NC020640 1             | Erignathus barbatus NC008426 1        | 0,16536377 |
| Mustela erminea T305 2                 | Ailuropus fulgens styani NC009691 1   | 0,16536734 |
| Mustela kathiah NC023210 1             | Bassariscus sumichrasti SRX1099089 1  | 0,16536929 |
| Phoca largha NC008430 1                | Nandinia binotata NC024567 1          | 0,1653786  |
| Viverricula indica KX891745 1          | Hydrurga leptonyx NC008425 1          | 0,16538182 |
| Viverra zibetha T609 1                 | Hydrurga leptonyx NC008425 1          | 0,16538329 |
| Leopardus jacobita NC028322 1          | Hydrurga leptonyx NC008425 1          | 0,16538629 |
| Ursus spelaeus NC011112 8              | Leptonychotes weddellii NC008424 1    | 0,16538885 |
| Ursus spelaeus EU327344 13             | Hydrurga leptonyx NC008425 1          | 0,16540293 |
| Mirounga leonina NC008422 1            | Homotherium latidens MF871702 3       | 0,16540316 |

|                                        |                                       |            |
|----------------------------------------|---------------------------------------|------------|
| Viverra tangalunga MH464792 1          | Ailuropus melanoleuca NC009492 5      | 0,1874139  |
| Procyon lotor AB462046 3               | Arctictis binturong T605 2            | 0,18741588 |
| Ursus arctos isabellinus 18B5 2        | Lycalopex sechurae KT448284 1         | 0,18741976 |
| Poecilogale albinucha T602 1           | Melursus ursinus NC009970 2           | 0,1874201  |
| Ursus arctos EU497665 29               | Arctocepalus forsteri NC004023 28     | 0,18742359 |
| Prionodon linsang ERR2391707 1         | Gulo gulo NC009685 3                  | 0,18742442 |
| Martes flavigula NC012141 3            | Helogale parvula SRR7637809 1         | 0,18742676 |
| Prionodon pardicolor NC024569 2        | Canis lupus familiaris NC002008 1231  | 0,18743132 |
| Ursus spelaeus NC011112 8              | Mephitis mephitis NC020648 1          | 0,18743259 |
| Panthera leo NERO 19                   | Aonyx cinerea NC035814 2              | 0,187433   |
| Hemigalus derbyanus MH464791 1         | Arctocepalus gazella BK010918 1       | 0,18743356 |
| Cuon alpinus NC013445 3                | Arctodus simus NC011116 1             | 0,18743896 |
| Melursus ursinus NC009970 2            | ICTONYX STRIATUS T299 1               | 0,18743931 |
| Tremarctos ornatus NC009969 2          | Conepatus chinga NC042596 1           | 0,18744054 |
| Leopardus jacobita NC028322 1          | Arctocepalus forsteri NC004023 28     | 0,18744104 |
| Genetta servalina NC024568 2           | Cuon alpinus NC013445 3               | 0,18744412 |
| Panthera pardus NC010641 5             | Bassariscus sumichrasti SRX1099089 1  | 0,18744425 |
| Leopardus jacobita NC028322 1          | Canis mesomelas KT448280 1            | 0,18744515 |
| Ursus americanus JX196366 3            | Poecilogale albinucha T602 1          | 0,18744551 |
| Ursus semitorquatus MH464789 1         | Tapirus terrestris T358               | 0,18744753 |
| Parahyaena brunnea NC038159 15         | Eumetopias jubatus NC004030 10        | 0,18744861 |
| Attilax paludinosus T606 1             | Arctocepalus forsteri KT693377 17     | 0,1874494  |
| Arctictis binturong T605 2             | Tapirus terrestris T358               | 0,18745041 |
| Nyctereutes procyonoides NC013700 3    | Martes americana NC020642 1           | 0,18745047 |
| Prionodon pardicolor NC024569 2        | Lutra lutra LC011358 9                | 0,18745057 |
| Mustela eversmannii NC028013 1         | Galidictis fasciata DM333 1           | 0,18745242 |
| Mungotictis decemlineata NC027828 1    | Lutrogale perspicillata NC035811 1    | 0,18745334 |
| Nyctereutes procyonoides NC013700 3    | Mungotictis decemlineata NC027828 1   | 0,18745351 |
| Nyctereutes procyonoides NC013700 3    | Mustela sibirica AP017394 11          | 0,18745366 |
| Otaria byronia OTAB 1                  | Attilax paludinosus T606 1            | 0,18745483 |
| Procyon lotor AB462049 4               | Nyctereutes procyonoides NC013700 3   | 0,18745637 |
| Melogale moschata KP726273 1           | Cryptoprocta ferox CFC13 1            | 0,18745756 |
| Lutra lutra LC011358 9                 | Hyaena hyaena NC020669 1              | 0,18745825 |
| Prionailurus viverrinus NC028305 1     | Lutrogale perspicillata NC035811 1    | 0,18745869 |
| Vulpes ferrilata NC027935 1            | Mustela altaica NC021751 1            | 0,18746053 |
| Urocyon cinereoargenteus NC026723 2    | Martes pennanti NC020664 16           | 0,18746118 |
| Panthera onca KP202264 2               | Martes melampus NC009678 1            | 0,18746411 |
| Vulpes zerdia KJ603240 1               | Martes pennanti NC020664 16           | 0,18746153 |
| Vulpes lagopus NC026529 3              | Panthera uncia KP202269 1             | 0,18746251 |
| Vulpes corsac NC023958 1               | Lynx canadensis NC028313 1            | 0,18746275 |
| Parahyaena brunnea NC038159 15         | Arctonx collaris NC020645 1           | 0,18746315 |
| Enhydra lutris NC009692 1              | Crocuta crocuta NC020670 3            | 0,18746346 |
| Genetta genetta T297 1                 | Canis anthus NC027956 2               | 0,18746361 |
| Vulpes ferrilata NC027935 1            | Leopardus jacobita NC028322 1         | 0,18746366 |
| Prionodon linsang ERR2391707 1         | Bassariscus sumichrasti SRX1099089 1  | 0,18746388 |
| Pardofelis marmorata NLN3 2            | Lontra canadensis SRR10409165 1       | 0,18746409 |
| Paradoxurus hermaphroditus NLCN 1      | Arctotherium sp NC030174 1            | 0,18746598 |
| Canis anthus NC027956 2                | Arctodus simus NC011116 1             | 0,18746704 |
| Urocyon cinereoargenteus NC026723 2    | Catopuma temminckii NC027115 41       | 0,18746741 |
| Parahyaena brunnea NC038159 15         | Lutrogale perspicillata NC035811 1    | 0,18746763 |
| Neophoca cinerea NC008419 1            | Leopardus jacobita NC028322 1         | 0,18746789 |
| Hyaena hyaena NC020669 1               | Canis aureus KT448274 1               | 0,18746857 |
| Ursus arctos isabellinus 18B5 2        | Genetta genetta T297 1                | 0,18747152 |
| Panthera tigris amoyensis NC014770 2   | Lutra sumatrana NC035810 1            | 0,18747128 |
| Melogale moschata V0735A 1             | Arctictis binturong T605 2            | 0,18747242 |
| Panthera uncia KP202269 1              | Otocyon megalotis SAF 2               | 0,1874727  |
| Ursus arctos EU497665 29               | Lynx lynx NC027083 4                  | 0,18747364 |
| Ursus arctos isabellinus 18B5 2        | Lynx pardinus NC028319 161            | 0,1874737  |
| Odobenus rosmarus NC004029 29          | Bassariscus sumichrasti SRX1099089 1  | 0,18747598 |
| Ursus thibetanus formosanus NC00993 3  | Canis latrans NC008093 7              | 0,18747716 |
| Poecilogale albinucha T602 1           | Canis aureus KT448274 1               | 0,18747765 |
| Ursus arctos GUS73491 207              | Catopuma temminckii NC027115 41       | 0,1874782  |
| Paradoxurus hermaphroditus NLCN 1      | ICTONYX STRIATUS T299 1               | 0,18747823 |
| Melursus ursinus NC009970 2            | Chrotogale owstoni T607 1             | 0,18747954 |
| Ursus thibetanus laniger MH281753 2    | Otocyon megalotis SAF 2               | 0,18748251 |
| Viverra tangalunga MH464792 1          | Ursus arctos AP012576 6               | 0,18748325 |
| Crossarchus platycephalus C7R66 1      | Canis mesomelas KT448280 1            | 0,18748346 |
| Suricata suricatta SSM10 1             | Canis lupus familiaris NC002008 1231  | 0,18748449 |
| Enhydra lutris NC009692 1              | Canis lupus chanco NC010340 4         | 0,18748567 |
| Paradoxurus jerdoni MH464793 1         | Melursus ursinus NC009970 2           | 0,18748568 |
| Ursus thibetanus mupinensis NC008753 2 | Lycalopex sechurae KT448284 1         | 0,18748698 |
| Halichoerus grypus NC001602 2          | Tapirus terrestris T358               | 0,18748805 |
| Ursus thibetanus laniger MH281753 2    | Prionailurus viverrinus NC028305 1    | 0,18748806 |
| Prionailurus planiceps NC028312 6      | Melursus ursinus NC009970 2           | 0,18748946 |
| Ursus americanus JX196366 3            | Galidictis fasciata DM333 1           | 0,18749546 |
| Panthera pardus NC010641 5             | Meles leucurus NC039173 4             | 0,18749693 |
| Canis adustus KT448271 1               | Tapirus terrestris T358               | 0,1874979  |
| Martes foina NC020643 1                | Urva javanica/auropunctata NC006835 1 | 0,18750072 |
| Ursus americanus JX196366 3            | Procyon lotor AB462049 4              | 0,18750383 |
| Puma concolor NC016470 22              | Arctocepalus forsteri NC004023 28     | 0,18750432 |
| Ursus americanus JX196366 3            | Bassariscus sumichrasti SRX1099089 1  | 0,18750535 |
| Felis catus NC001700 2                 | Eumetopias jubatus NC004030 10        | 0,187511   |
| Neovison vison NC020641 3              | Neofelis nebulosa NC008450 3          | 0,18751152 |
| Lutra sumatrana NC035810 1             | Bdeogale nigripes GLC15 1             | 0,18751304 |
| Ursus arctos pruinosus MG066703 3      | Civettictis civetta NC033778 1        | 0,18751584 |
| Phocarcus hookeri NC008418 1           | Urva semitorquatus MH464789 1         | 0,18751678 |
| Mungos mungo/gambianus SRR77048 1      | Ailuropus fulgens NC011124 1          | 0,18751772 |
| Felis margarita NC028308 1             | Tapirus terrestris T358               | 0,18752004 |
| Felis silvestris lybica KP202275 4     | Tapirus terrestris T358               | 0,187521   |
| Pardofelis marmorata NLN3 2            | Tapirus terrestris T358               | 0,18752104 |
| Mustela nigripes NC024942 1            | Mungotictis decemlineata NC027828 1   | 0,18752107 |
| Vulpes corsac NC023958 1               | Mustela kathiah NC023210 1            | 0,18752119 |
| Diplogale hosei MH464790 1             | Arctotherium sp NC030174 1            | 0,18752351 |
| Lycyon pictus NC028427 2               | Enhydra lutris NC009692 1             | 0,18752386 |
| Panthera uncia NC010638 1              | Lutra lutra LC011358 9                | 0,18752533 |
| Procyon lotor AB462046 3               | Canis latrans NC008093 7              | 0,18752539 |
| Vulpes vulpes NC008434 5               | Paradoxurus hermaphroditus NLCN 1     | 0,1875255  |
| Lutrogale perspicillata NC035811 1     | Leopardus tigrinus NC028317 1         | 0,18752608 |
| Vulpes lagopus NC026529 3              | Paguma larvata PDD511 2               | 0,1875262  |
| Lutrogale perspicillata NC035811 1     | Leopardus jacobita NC028322 1         | 0,18752632 |
| Lynx canadensis NC028313 1             | Canis mesomelas KT448280 1            | 0,1875266  |
| Hyaena hyaena NC020669 1               | Callorhinus ursinus NC008415 1        | 0,18752697 |
| Urocyon littoralis catalinae KP129018  | Martes pennanti NC020664 16           | 0,18752858 |

|                                        |                                       |            |
|----------------------------------------|---------------------------------------|------------|
| Panthera uncia NC010638 1              | Cynogale bennetti KY117544 1          | 0,16541623 |
| Viverra tangalunga MH464792 1          | Potos flavus T414 1                   | 0,16543011 |
| Mustela sibirica NC020637 6            | Mellivora capensis T370 1             | 0,16543847 |
| Mustela sibirica NC020637 6            | Hydrurga leptonyx NC008425 1          | 0,16543873 |
| Taxidea taxus NC020646 1               | Phoca fasciata NC008428 1             | 0,16544479 |
| Martes pennanti NC020664 16            | Lobodon carcinophaga NC008423 1       | 0,16544613 |
| Martes foina NC020643 1                | Hydrurga leptonyx NC008425 1          | 0,16545378 |
| Ursus thibetanus formosanus NC009331 1 | Phoca groenlandica NC008429 54        | 0,16545978 |
| Leptonychotes weddellii NC008424 1     | Leopardus colocolo NC028314 1         | 0,16546214 |
| Mirounga leonina NC008422 1            | Arctonyx collaris NC020645 1          | 0,16549349 |
| Martes americana NC020642 1            | Leptonychotes weddellii NC008424 1    | 0,16549508 |
| Martes zibellina NC011579 39           | Leptonychotes weddellii NC008424 1    | 0,16549526 |
| Potos flavus T414 1                    | Mustela eversmannii NC020641 3        | 0,16549672 |
| Procyon lotor AB462049 4               | Meles leucurus NC039173 4             | 0,16549902 |
| Mustela kathiah NC023210 1             | Lobodon carcinophaga NC008423 1       | 0,16550586 |
| Mustela nigripes NC024942 1            | Lobodon carcinophaga NC008423 1       | 0,16550651 |
| Martes zibellina NC011579 39           | Hydrurga leptonyx NC008425 1          | 0,16550934 |
| Prionodon pardicolor NC024569 2        | Parahyaena brunnea NC038159 15        | 0,16552722 |
| Mustela eversmannii NC028013 1         | Mellivora capensis T370 1             | 0,16557309 |
| Viverra tangalunga MH464792 1          | Hydrurga leptonyx NC008425 1          | 0,16557316 |
| Martes martes T302 3                   | Lobodon carcinophaga NC008423 1       | 0,16557918 |
| Mustela nivalis T306 5                 | Mellivora capensis T370 1             | 0,16557998 |
| Ursus thibetanus thibetanus NC011118 4 | Leptonychotes weddellii NC008424 1    | 0,16559075 |
| Mirounga angustirostris SRR10331586 1  | Homotherium latidens MF871702 3       | 0,16559613 |
| Neofelis nebulosa NC008450 3           | Ursa brachyura KY117547 1             | 0,16560835 |
| Halichoerus grypus NC001602 2          | Arctotherium sp NC030174 1            | 0,1656251  |
| Pusa hispida NC 008433 1               | Lutra lutra NC011358 9                | 0,16563912 |
| Mirounga leonina NC008422 1            | Bassariscus sumichrasti SRX1099089 1  | 0,16564301 |
| Martes foina NC020643 1                | Leptonychotes weddellii NC008424 1    | 0,16564308 |
| Pusa sibirica NC008432 2               | Martes foina NC020643 1               | 0,16564454 |
| Procyon lotor AB462046 3               | Mustela altaica NC021751 1            | 0,16564499 |
| Leptonychotes weddellii NC008424 1     | Leopardus pardalis NC028315 1         | 0,16564536 |
| Prionailurus bengalensis CKM45 20      | Leptonychotes weddellii NC008424 1    | 0,16564801 |
| Viverricula indica XK891745 1          | Lobodon carcinophaga NC008423 1       | 0,16565511 |
| Leptailurus serval NC028316 1          | Hydrurga leptonyx NC008425 1          | 0,16565939 |
| Parahyaena brunnea NC038159 15         | Paradoxurus jerdoni MH464793 1        | 0,16566244 |
| Ursus spelaeus NC011112 8              | Phoca fasciata NC008428 1             | 0,16566417 |
| Gulo gulo NC009685 3                   | Erigonathus barbatus NC008426 1       | 0,16566658 |
| Ursus thibetanus formosanus NC009331 1 | Hydrurga leptonyx NC008425 1          | 0,16567083 |
| Meles leucurus NC039173 4              | Cystophora cristata NC008427 1        | 0,16569671 |
| Lobodon carcinophaga NC008423 1        | Canis adustus KT448271 1              | 0,16570839 |
| Mustela itatsi NC034330 19             | Hydrurga leptonyx NC008425 1          | 0,16570847 |
| Phoca fasciata NC008428 1              | Mustela frenata NC020640 1            | 0,16570914 |
| Ursus thibetanus mupinensis NC008753 2 | Hydrurga leptonyx NC008425 1          | 0,16572809 |
| Ommatophoca rossii AY377287etc 1       | Odobenus rosamaris NC004029 29        | 0,16574116 |
| Parahyaena brunnea NC038159 15         | Arctictis binturong T605 2            | 0,16574527 |
| Martes melampus NC009678 1             | Erigonathus barbatus NC008426 1       | 0,16576017 |
| Martes zibellina NC011579 39           | Erigonathus barbatus NC008426 1       | 0,16576564 |
| Procyon lotor AB462046 3               | Meles anakuma NC009677 1              | 0,16576695 |
| Meles anakuma NC009677 1               | Bassariscus sumichrasti SRX1099089 1  | 0,16576859 |
| Melogale moschata KP726273 1           | Bassariscus sumichrasti SRX1099089 1  | 0,1657735  |
| Mustela putorius NC020638 4            | Hydrurga leptonyx NC008425 1          | 0,16577557 |
| Leptonychotes weddellii NC008424 1     | Leopardus jacobita NC028322 1         | 0,16578072 |
| Prionodon pardicolor NC024569 2        | Hyaena hyaena NC020669 1              | 0,16578934 |
| Leopardus tigrinus NC028317 1          | Hydrurga leptonyx NC008425 1          | 0,1657901  |
| Pusa hispida NC 008433 1               | Martes foina NC020643 1               | 0,16579039 |
| Phoca largha NC008430 1                | Martes foina NC020643 1               | 0,16579178 |
| Monachus monachus NC0044972 5          | Arctotherium sp NC030174 1            | 0,16580845 |
| Mustela sibirica NC020637 6            | Leptonychotes weddellii NC008424 1    | 0,16583171 |
| Mustela nigripes NC024942 1            | Leptonychotes weddellii NC008424 1    | 0,16583222 |
| Procyon lotor AB462046 3               | Arctonyx collaris NC020645 1          | 0,16583483 |
| Martes melampus NC009678 1             | Lobodon carcinophaga NC008423 1       | 0,16583939 |
| Melogale moschata V0735A 1             | Bassariscus sumichrasti SRX1099089 1  | 0,16584017 |
| Phoca largha NC008430 1                | Mustela frenata NC020640 1            | 0,16584894 |
| Lynx rufus NC014456 3                  | Hydrurga leptonyx NC008425 1          | 0,16585618 |
| Viverricula indica NC025296 2          | Hydrurga leptonyx NC008425 1          | 0,16585784 |
| Leopardus geoffroyi NC028320 1         | Hydrurga leptonyx NC008425 1          | 0,16585849 |
| Ursus spelaeus EU327344 13             | Leptonychotes weddellii NC008424 1    | 0,16585828 |
| Martes flavigula NC012141 3            | Erigonathus barbatus NC008426 1       | 0,16587044 |
| Ommatophoca rossii AY377287etc 1       | Nandinia binotata NC024567 1          | 0,16587208 |
| Lutra sumatrana NC035810 1             | Halichoerus grypus NC001602 2         | 0,16588031 |
| Crocota crocata NC020670 3             | Arctictis binturong T605 2            | 0,16588834 |
| Viverra tangalunga MH464792 1          | Procyon lotor AB462046 3              | 0,16590515 |
| Leptonychotes weddellii NC008424 1     | Leopardus wiedii NC028318 1           | 0,16591525 |
| Potos flavus T414 1                    | Monachus schauinslandi NC008421 1     | 0,16591632 |
| Leopardus wiedii NC028318 1            | Hydrurga leptonyx NC008425 1          | 0,16592525 |
| Leptonychotes weddellii NC008424 1     | Genetta abyssinica MG489822 1         | 0,16593519 |
| Pusa hispida NC 008433 1               | Meles meles T303 3                    | 0,16597524 |
| Mustela putorius NC020638 4            | Mellivora capensis T370 1             | 0,16597694 |
| Neovison vison NC020641 3              | Mellivora capensis T370 1             | 0,16598308 |
| Mustela altaica NC021751 1             | Mellivora capensis T370 1             | 0,16598324 |
| Mustela nivalis T306 5                 | Lobodon carcinophaga NC008423 1       | 0,16598791 |
| Ursus spelaeus NC011112 8              | Cystophora cristata NC008427 1        | 0,16599394 |
| Paradoxurus hermaphroditus NLNC 1      | Crocota crocata NC020670 3            | 0,16599897 |
| Ursus spelaeus EU327344 13             | Phoca fasciata NC008428 1             | 0,16600084 |
| Mellivora capensis T370 1              | Aonyx cinerea NC035814 2              | 0,16602732 |
| Panthera tigris amoyensis NC014770 2   | Cynogale bennetti KY117544 1          | 0,16602783 |
| Lutra lutra NC011358 9                 | Cystophora cristata NC008427 1        | 0,16603096 |
| Potos flavus T414 1                    | Meles anakuma NC009677 1              | 0,16603187 |
| Phoca largha NC008430 1                | Lutra lutra NC011358 9                | 0,16604461 |
| Potos flavus T414 1                    | Mirounga angustirostris SRR10331586 1 | 0,16605195 |
| Hydrurga leptonyx NC008425 1           | Felis nigripes NC028309 1             | 0,16605899 |
| Viverricula indica NC025296 2          | Lobodon carcinophaga NC008423 1       | 0,16605946 |
| Ursus thibetanus thibetanus NC011118 4 | Lobodon carcinophaga NC008423 1       | 0,1660762  |
| Proteles cristata T393 6               | Panthera tigris NC010642 35           | 0,16607714 |
| Hydrurga leptonyx NC008425 1           | Gulo gulo NC009685 3                  | 0,16608001 |
| Mustela nigripes NC024942 1            | Cystophora cristata NC008427 1        | 0,16610366 |
| Mustela erminea T305 2                 | Monachus schauinslandi NC008421 1     | 0,16611373 |
| Mirounga angustirostris SRR10331586 1  | Meles meles T303 3                    | 0,16611473 |
| Martes americana NC020642 1            | Lobodon carcinophaga NC008423 1       | 0,16611528 |
| Puma concolor NC016470 22              | Hydrurga leptonyx NC008425 1          | 0,16612542 |
| Ursus spelaeus NC011112 8              | Erigonathus barbatus NC008426 1       | 0,16612908 |
| Meles meles T303 3                     | Cystophora cristata NC008427 1        | 0,16616832 |

|                                        |                                     |            |
|----------------------------------------|-------------------------------------|------------|
| Panthera uncia KP202269 1              | Mustela sibirica NC020637 6         | 0,18752865 |
| Panthera uncia KP202269 1              | Mustela eversmannii NC028013 1      | 0,18752876 |
| Panthera pardus japonensis KJ866876    | Mustela eversmannii NC028013 1      | 0,18752933 |
| Ictonyx striatus T299 1                | Ursa semitorquata MH464789 1        | 0,18752937 |
| Vulpes corsac NC023958 1               | Caracal caracal NC028306 1          | 0,18753088 |
| Vulpes ferrillata NC027935 1           | Neovison vison NC020641 3           | 0,18753095 |
| Vulpes corsac NC023958 1               | Otocolobus manul NC028323 1         | 0,18753116 |
| Puma concolor NC016470 22              | Arctocepalus gazella BK010918 1     | 0,18753123 |
| Vulpes zerda KJ603240 1                | Prionailurus planiceps KY682741 4   | 0,18753152 |
| Panthera onca KP202264 2               | Arctocepalus pusillus NC008417 1    | 0,18753447 |
| Proteles cristata T393 6               | Arctonyx collaris NC020645 1        | 0,1875347  |
| Panthera tigris amoyensis NC014770 2   | Lutra lutra LC050126 1              | 0,18753512 |
| Zalophus wollebaeki SRR4431565 1       | Nyctereutes procyonoides NC013700 3 | 0,18753548 |
| Galictis vittata T412 1                | Fossa fossana D350 1                | 0,1875366  |
| Procyon lotor AB462046 3               | Paradoxurus hermaphroditus NC03959  | 0,18753663 |
| Ursa brachyura KY117547 1              | Chrysoyon brachyurus NC024172 1     | 0,18753672 |
| Poecilogale albinucha T602 1           | Caracal caracal NC028306 1          | 0,18753766 |
| Profelis aurata NC028299 1             | Martes pennanti NC020664 16         | 0,18753809 |
| Panthera pardus japonensis KJ866876    | Mustela nivalis T306 5              | 0,18753877 |
| Ichneumia albicauda T603 1             | Chrysoyon brachyurus NC024172 1     | 0,18753886 |
| Galictis vittata T412 1                | Arctocepalus townsendi NC008420 1   | 0,18753913 |
| Panthera tigris NC010642 35            | Lutra sumatrana NC035810 1          | 0,18753958 |
| Melursus ursinus NC009970 2            | Crossarchus platycephalus C7R66 1   | 0,18754052 |
| Ursus maritimus NC003428 31            | Lynx rufus NC014456 3               | 0,18754128 |
| Ursus arctos EU497665 29               | Lynx rufus NC014456 3               | 0,18754141 |
| Helogale parvula SRR7637809 1          | Canis lupus chanco NC010340 4       | 0,1875418  |
| Tremarctos ornatus NC009969 2          | Lycalopex secureus KT448284 1       | 0,18754268 |
| Ursus arctos EU497665 29               | Caracal caracal NC028306 1          | 0,18754372 |
| Ursus arctos AP012576 6                | Lutra lutra LC050126 1              | 0,18754408 |
| Panthera leo spelaea XK258452 2        | Canis latrans NC008093 7            | 0,18754499 |
| Ursus arctos GU573486 5                | Genetta genetta T297 1              | 0,18754511 |
| Ursus arctos AP012576 6                | Chrotogale owstoni T607 1           | 0,18754542 |
| Ursus arctos GU573491 207              | Leopardus geoffroyi NC028320 1      | 0,18754633 |
| Ursus arctos EU497665 29               | Prionailurus bengalensis CKM45 20   | 0,18754666 |
| Paradoxurus jerdoni MH464793 1         | Arctocepalus forsteri NC004023 28   | 0,18754701 |
| Ursus arctos GU573486 5                | Leopardus pardalis T262 1           | 0,18754841 |
| Ursus arctos GU573486 5                | Leopardus wiedii NC028318 1         | 0,18754853 |
| Ursus spelaeus EU327344 13             | Procyon lotor AB462049 4            | 0,18754856 |
| Paguma larvata PDD511 2                | Melursus ursinus NC009970 2         | 0,18755366 |
| Panthera onca NC022842 1               | Lycyon pictus NC028427 2            | 0,18755399 |
| Helarctos malayanus NC009968 2         | Felis nigripes NC028309 1           | 0,18755522 |
| Prionailurus viverrinus NC028305 1     | Helarctos malayanus NC009968 2      | 0,18755609 |
| Fossa fossana D350 1                   | Canis mesomelas KT448280 1          | 0,18755868 |
| Eupleres goudotii D128 1               | Arctocepalus forsteri NC004023 28   | 0,18755893 |
| Potos flavus T414 1                    | Panthera leo NERO 19                | 0,18756336 |
| Ursus thibetanus formosanus NC009331 1 | Galictis vittata T412 1             | 0,18756366 |
| Ursus thibetanus laniger MH281753 2    | Galictis vittata T412 1             | 0,18756495 |
| Vulpes vulpes NC008434 5               | Eumetopias jubatus NC004030 10      | 0,18756767 |
| Conepatus chinga NC042596 1            | Arctocepalus australis MG023139 1   | 0,18758047 |
| Lontra canadensis SRR10409165 1        | Eupleres goudotii D128 1            | 0,18758124 |
| Bdeogale nigripes GLC15 1              | Arctocepalus australis MG023139 1   | 0,18758398 |
| Crossarchus platycephalus C7R66 1      | Ailurus fulgens NC011124 1          | 0,18758419 |
| Lontra canadensis SRR10409165 1        | Galictis fasciata DM333 1           | 0,18758439 |
| Neofelis nebulosa NC008450 3           | Ictonyx striatus T299 1             | 0,18758439 |
| Panthera pardus NC010641 5             | Martes foina NC020643 1             | 0,18758659 |
| Nyctereutes procyonoides NC013700 3    | Ursa brachyura KY117547 1           | 0,18758722 |
| Vulpes corsac NC023958 1               | Galictis fasciata DM333 1           | 0,18758869 |
| Meles anakuma NC009677 1               | Galarella sanguinea T378 1          | 0,18759024 |
| Meles leucurus NC039173 4              | Cryptoprocta ferox CFC13 1          | 0,1875916  |
| Xenogale naso C07XAR110 1              | Arctotherium sp NC030174 1          | 0,18759209 |
| Procyon lotor AB462049 4               | Canis latrans NC008093 7            | 0,18759228 |
| Phoca largha NC008430 1                | Cynogale bennetti KY117544 1        | 0,18759489 |
| Mustela eversmannii NC028013 1         | Cryptoprocta ferox CFC13 1          | 0,18759525 |
| Ichneumia albicauda T603 1             | Arctocepalus australis MG023139 1   | 0,18759587 |
| Vulpes vulpes NC008434 5               | Genetta genetta T297 1              | 0,18759617 |
| Vulpes corsac NC023958 1               | Pardofelis marmorata NLN3 2         | 0,18759726 |
| Profelis aurata NC028299 1             | Mustela sibirica NC020637 6         | 0,1875973  |
| Vulpes ferrillata NC027935 1           | Prionailurus planiceps NC028312 6   | 0,18759811 |
| Felis silvestris lybica KP202275 4     | Arctocepalus gazella BK010918 1     | 0,18759817 |
| Smlodon populator MF871700 1           | Galictis vittata T412 1             | 0,18759817 |
| Urocyon cinereoargenteus NC026723 2    | Lynx lynx NC027083 4                | 0,1875985  |
| Parahyaena brunnea NC038159 15         | Mustela kathiah NC023210 1          | 0,18759918 |
| Ursus thibetanus mupinensis NC008753 2 | Bassaricyon neblina SRX1097850 1    | 0,18759952 |
| Lontra canadensis SRR10409165 1        | Leopardus pardalis NC028315 1       | 0,1875996  |
| Otocyon megalotis SAF 1 2              | Genetta servalina NC024568 2        | 0,18760188 |
| Panthera pardus japonensis KJ866876    | Aonyx cinerea NC035814 2            | 0,18760224 |
| Ictonyx striatus T299 1                | Eupleres goudotii D128 1            | 0,18760271 |
| Chrysoyon brachyurus NC024172 1        | Bdeogale nigripes GLC15 1           | 0,18760273 |
| Lutrogale perspicillata NC035811 1     | Felis catus NC001700 2              | 0,18760301 |
| Leopardus guigna NC028321 1            | Canis anthus NC027956 2             | 0,18760332 |
| Panthera uncia KP202269 1              | Neovison vison NC020641 3           | 0,18760341 |
| Melogale moschata NC020644 1           | Lycyon pictus NC028427 2            | 0,1876041  |
| Martes martes T302 3                   | Hyaena hyaena NC020669 1            | 0,18760526 |
| Panthera tigris NC010642 35            | Melogale moschata KP726273 1        | 0,18760571 |
| Otocolobus manul NC028323 1            | Arctotherium sp NC030174 1          | 0,18760598 |
| Cynictis penicillata T375 1            | Ailuropoda melanoleuca NC009492 5   | 0,18760608 |
| Melursus ursinus NC009970 2            | Lutra lutra NC011358 9              | 0,18760674 |
| Galictis vittata T412 1                | Crossarchus platycephalus C7R66 1   | 0,18760805 |
| Ursus arctos pruinosus MG066703 3      | Lynx lynx NC027083 4                | 0,18760841 |
| Ursus maritimus NC003428 31            | Lynx canadensis NC028313 1          | 0,1876085  |
| Ursus thibetanus formosanus NC009331 1 | Mungos mungo MMC7 1                 | 0,1876086  |
| Speothos venaticus C48 2               | Lynx lynx NC027083 4                | 0,18760896 |
| Ursus thibetanus formosanus NC009331 1 | Lontra canadensis SRR10409165 1     | 0,18760955 |
| Ursus arctos isabellinus 1885 2        | Leptailurus serval NC028316 1       | 0,18761058 |
| Speothos venaticus C48 2               | Felis catus NC001700 2              | 0,1876107  |
| Ursus maritimus NC003428 31            | Caracal caracal NC028306 1          | 0,18761098 |
| Odobenus rosamaris NC004029 29         | Neovison vison NC020641 3           | 0,18761253 |
| Ictonyx striatus T299 1                | Canis latrans NC008093 7            | 0,18761285 |
| Ursus arctos pruinosus MG066703 3      | Catopuma temminckii NC027115 41     | 0,1876135  |
| Melursus ursinus NC009970 2            | Hyaena hyaena NC020669 1            | 0,18761374 |
| Ursus arctos GU573486 5                | Lynx rufus NC014456 3               | 0,18761463 |
| Martes martes T302 3                   | Ailuropoda melanoleuca NC009492 5   | 0,18761495 |
| Ursus arctos GU573486 5                | Prionailurus rubiginosus NC028304 2 | 0,18761619 |

|                                         |                                      |            |
|-----------------------------------------|--------------------------------------|------------|
| Leptonychotes weddellii NC008424 1      | Aonyx cinerea NC035814 2             | 0,166177   |
| Monachus schauinslandi NC008421 1       | Meles leucurus NC039173 4            | 0,16617784 |
| Phoca vitulina NC001325 1               | Lutra lutra LC050126 1               | 0,1661796  |
| Monachus schauinslandi NC008421 1       | Arctodus simus NC011116 1            | 0,16619566 |
| Viverra tangalunga MH464792 1           | Bassariscus sumichrasti SRX1099089 1 | 0,16624364 |
| Potos flavus T414 1                     | Phoca fasciata NC008428 1            | 0,16625002 |
| Procyon lotor AB462049 4                | Martes martes T302 3                 | 0,16625084 |
| Otocolobus manul NC028323 1             | Hydrurga leptonyx NC008425 1         | 0,16625972 |
| Mirounga angustirostris SRR10331586 1   | Bassariscus sumichrasti SRX1099089 1 | 0,16626208 |
| Crocota crocata NC020670 3              | Chrotogale owstoni T607 1            | 0,16626252 |
| Mellivora capensis T370 1               | Lutrogale perspicillata NC035811 1   | 0,16629584 |
| Pusa sibirica NC008432 2                | Lutra sumatrana NC035810 1           | 0,16630268 |
| Martes americana NC020642 1             | Erigonathus barbatus NC008426 1      | 0,16630414 |
| Potos flavus T414 1                     | Mirounga leonina NC008422 1          | 0,16630886 |
| Procyon lotor AB462046 3                | Mustela putorius NC020638 4          | 0,16630949 |
| Suricata suricatta SSM10 1              | Prionodon pardicolor NC024569 2      | 0,16631791 |
| Panthera uncia NC010638 1               | Crocota crocata NC020670 3           | 0,16633856 |
| Hydrurga leptonyx NC008425 1            | Acinonyx jubatus NC005212 3          | 0,16634227 |
| Mellivora capensis T370 1               | Meles leucurus NC039173 4            | 0,16636382 |
| Martes melampus NC009678 1              | Cystophora cristata NC008427 1       | 0,16636774 |
| Pusa caspica NC008431 1                 | Mustela frenata NC020640 1           | 0,16637562 |
| Pusa hispida NC 008433 1                | Arctonyx collaris NC020645 1         | 0,16637896 |
| Mustela frenata NC020640 1              | Mellivora capensis T370 1            | 0,16638112 |
| Mustela nigripes NC024942 1             | Hydrurga leptonyx NC008425 1         | 0,16638164 |
| Ursus thibetanus mupiniensis NC008753 2 | Leptonychotes weddellii NC008424 1   | 0,16638671 |
| Pusa hispida NC 008433 1                | Potos flavus T414 1                  | 0,16638713 |
| Proteles cristata T393 6                | Paguma larvata PDS11 2               | 0,1664037  |
| Ursus thibetanus formosanus NC009331 1  | Lobodon carcinophaga NC008423 1      | 0,16641058 |
| Martes flavigula NC012141 3             | Cystophora cristata NC008427 1       | 0,16641554 |
| Pusa hispida NC 008433 1                | Gulo gulo NC009685 3                 | 0,16642192 |
| Monachus schauinslandi NC008421 1       | Lutra lutra LC050126 1               | 0,16644318 |
| Potos flavus T414 1                     | Cystophora cristata NC008427 1       | 0,16644402 |
| Leptonychotes weddellii NC008424 1      | Felis silvestris lybica KP202275 4   | 0,16645131 |
| Martes americana NC020642 1             | Hydrurga leptonyx NC008425 1         | 0,16645171 |
| Phoca largha NC008430 1                 | Martes martes T302 3                 | 0,16645744 |
| Hydrurga leptonyx NC008425 1            | Felis silvestris lybica KP202275 4   | 0,16646205 |
| Ursus thibetanus mupiniensis NC008753 2 | Lobodon carcinophaga NC008423 1      | 0,16646488 |
| Phoca fasciata NC008428 1               | Melurus ursinus NC009970 2           | 0,16647068 |
| Ursus thibetanus thibetanus NC011118 4  | Phoca fasciata NC008428 1            | 0,16647229 |
| Potos flavus T414 1                     | Monachus monachus NC044972 5         | 0,16648152 |
| Procyon lotor AB462046 3                | Neovison vison NC020641 3            | 0,16651873 |
| Hydrurga leptonyx NC008425 1            | Ailuropus fulgens styani NC009691 1  | 0,16651908 |
| Leptonychotes weddellii NC008424 1      | Urocyon cinereoargenteus NC026723 2  | 0,16652067 |
| Ursus thibetanus mupiniensis NC008753 2 | Phoca fasciata NC008428 1            | 0,16652788 |
| Ursus spelaeus EU327344 13              | Erigonathus barbatus NC008426 1      | 0,16653314 |
| Proteles cristata T393 6                | Panthera tigris amoyensis NC014770 2 | 0,16654864 |
| Leopardus colocolo NC028314 1           | Hydrurga leptonyx NC008425 1         | 0,16654901 |
| Potos flavus T414 1                     | Halichoerus grypus NC001602 2        | 0,16656007 |
| Lutra sumatrana NC035810 1              | Erigonathus barbatus NC008426 1      | 0,16656943 |
| Eupleres goudoti D128 1                 | Cynogale bennetti KY117544 1         | 0,16657175 |
| Meles anakuma NC009677 1                | Lobodon carcinophaga NC008423 1      | 0,16657901 |
| Phoca groenlandica NC008429 54          | Meles meles T303 3                   | 0,16658179 |
| Ursus arctos isabellinus 1885 2         | Leptonychotes weddellii NC008424 1   | 0,16658789 |
| Ursus maritimus NC003428 31             | Leptonychotes weddellii NC008424 1   | 0,16658798 |
| Potos flavus T414 1                     | Pocilogale albinucha T602 1          | 0,16659142 |
| Hydrurga leptonyx NC008425 1            | Genetta servalina NC024568 2         | 0,16659604 |
| Hydrurga leptonyx NC008425 1            | Canis adustus KT448271 1             | 0,16660258 |
| Phoca fasciata NC008428 1               | Helarctos malayanus NC009968 2       | 0,16660571 |
| Phoca groenlandica NC008429 54          | Mustela frenata NC020640 1           | 0,1666519  |
| Procyon lotor AB462046 3                | Martes martes T302 3                 | 0,16665466 |
| Pusa caspica NC008431 1                 | Meles meles T303 3                   | 0,16670716 |
| Procyon lotor AB462049 4                | Arctonyx collaris NC020645 1         | 0,16670987 |
| Procyon lotor AB462046 3                | Mustela nigripes NC024942 1          | 0,16671327 |
| Pusa hispida NC 008433 1                | Martes melampus NC009678 1           | 0,16671678 |
| Neovison vison NC020641 3               | Cystophora cristata NC008427 1       | 0,16671902 |
| Leptonychotes weddellii NC008424 1      | Leopardus tigrinus NC028317 1        | 0,16672327 |
| Martes pennanti NC020664 16             | Hydrurga leptonyx NC008425 1         | 0,16672485 |
| Melogale moschata NC020644 1            | Lobodon carcinophaga NC008423 1      | 0,16672514 |
| Melurus ursinus NC009970 2              | Leptonychotes weddellii NC008424 1   | 0,16673359 |
| Prionailurus viverrinus NC028305 1      | Hydrurga leptonyx NC008425 1         | 0,16673402 |
| Nandinia binotata NC024567 1            | Halichoerus grypus NC001602 2        | 0,16675968 |
| Pusa caspica NC008431 1                 | Lutra sumatrana NC035810 1           | 0,16677369 |
| Pusa hispida NC 008433 1                | Meles leucurus NC039173 4            | 0,16678321 |
| Erigonathus barbatus NC008426 1         | Bassariscus sumichrasti SRX1099089 1 | 0,16678336 |
| Monachus monachus NC044972 5            | Homotherium latidens MF871702 3      | 0,16678368 |
| Mustela nivalis T306 5                  | Leptonychotes weddellii NC008424 1   | 0,16678402 |
| Viverra tangalunga MH464792 1           | Mellivora capensis T370 1            | 0,1667847  |
| Mustela frenata NC020640 1              | Monachus schauinslandi NC008421 1    | 0,16678563 |
| Martes foina NC020643 1                 | Cystophora cristata NC008427 1       | 0,16678876 |
| Prionailurus viverrinus NC028305 1      | Leptonychotes weddellii NC008424 1   | 0,16679111 |
| Viverricula indica NC025296 2           | Leptonychotes weddellii NC008424 1   | 0,16679318 |
| Ursus arctos GU573486 5                 | Leptonychotes weddellii NC008424 1   | 0,16679643 |
| Ursus thibetanus formosanus NC009331 1  | Leptonychotes weddellii NC008424 1   | 0,16680083 |
| Ursus thibetanus laniger MH281753 2     | Phoca fasciata NC008428 1            | 0,16680653 |
| Procyon lotor AB462049 4                | Martes flavigula NC012141 3          | 0,16682206 |
| Meles leucurus NC039173 4               | Erigonathus barbatus NC008426 1      | 0,16684077 |
| Tremarctos ornatus NC009969 2           | Phoca fasciata NC008428 1            | 0,16684748 |
| Procyon lotor AB462046 3                | Mustela frenata NC020640 1           | 0,16684772 |
| Pusa hispida NC 008433 1                | Mustela itatsi NC034330 19           | 0,1668538  |
| Lobodon carcinophaga NC008423 1         | Genetta abyssinica MG489822 1        | 0,16685423 |
| Prionailurus rubiginos NC028304 2       | Leptonychotes weddellii NC008424 1   | 0,16685608 |
| Leptonychotes weddellii NC008424 1      | Leptailurus serval NC028316 1        | 0,16685651 |
| Lobodon carcinophaga NC008423 1         | Leopardus jacobita NC028322 1        | 0,1668677  |
| Phoca vitulina NC001325 1               | Martes foina NC020643 1              | 0,1668693  |
| Ursus arctos isabellinus 1885 2         | Hydrurga leptonyx NC008425 1         | 0,16687199 |
| Mustela erminea T305 2                  | Monachus monachus NC044972 5         | 0,16687779 |
| Mustela frenata NC020640 1              | Halichoerus grypus NC001602 2        | 0,16688168 |
| Mustela kathian NC023210 1              | Leptonychotes weddellii NC008424 1   | 0,16690901 |
| Pusa sibirica NC008432 2                | Meles meles T303 3                   | 0,16690929 |
| Mirounga leonina NC008422 1             | Arctotherium sp NC030174 1           | 0,16691865 |
| Procyon lotor AB462049 4                | Neovison vison NC020641 3            | 0,16692234 |
| Viverricula indica XK891745 1           | Leptonychotes weddellii NC008424 1   | 0,16692289 |
| Pusa caspica NC008431 1                 | Martes foina NC020643 1              | 0,16692381 |

|                                      |                                      |            |
|--------------------------------------|--------------------------------------|------------|
| Ursus thibetanus formosanus NC009331 | Paradoxurus hermaphroditus NLNC 1    | 0,18761691 |
| Melogale moschata KP726273 1         | Ura javanica/auropunctata NC006835   | 0,18761893 |
| Ursus maritimus NC003428 31          | Arctictis binturong T605 2           | 0,18761984 |
| Ursus spelaeus NC011112 8            | Panthera onca KP202264 2             | 0,18762082 |
| Galictis vittata T412 1              | Catopuma temminckii NC027115 41      | 0,18762268 |
| Ursus arctos pruinus MG066703 3      | Acinonyx jubatus NC005212 3          | 0,18762627 |
| Enhydra lutris NC009692 1            | Cuon alpinus NC013445 3              | 0,18762995 |
| Mungotictis decemlineata NC027828    | Gulo gulo NC009685 3                 | 0,18763006 |
| Panthera leo NERO 19                 | Mustela eversmannii NC028013 1       | 0,18763111 |
| Prionodon linsang ERR2391707 1       | Cuon alpinus NC013445 3              | 0,18763272 |
| Panthera pardus NC010641 5           | Lutra lutra LC050126 1               | 0,18763553 |
| Ursus arctos AP012576 6              | Urocyon striatus T299 1              | 0,18763565 |
| Mephitis mephitis NC020648 1         | Helarctos malayanus NC009968 2       | 0,18763709 |
| Panthera tigris amoyensis NC014770 2 | Canis aureus KT448274 1              | 0,18763748 |
| Ursus americanus JX196366 3          | Lynx rufus NC014456 3                | 0,18763895 |
| Ursus americanus JX196366 3          | Leptailurus serval NC028316 1        | 0,18764632 |
| Enhydra lutris NC009692 1            | Bdeogale nigripes GLC15 1            | 0,18764615 |
| Martes foina NC020643 1              | Cuon alpinus NC013445 3              | 0,18764733 |
| Mungos mungo/gambianus SRR77048      | Melogale moschata V0735A 1           | 0,18764818 |
| Suricata suricatta SSM10 1           | Meles meles T303 3                   | 0,18764818 |
| Enhydra lutris NC009692 1            | Canis anthus NC027956 2              | 0,18764862 |
| Martes zibellina NC011579 39         | Eupleres goudoti D128 1              | 0,18764928 |
| Ura semitorquata MH464789 1          | Arctocepalus townsendi NC008420 1    | 0,18765059 |
| Nyctereutes procyonoides NC013700 3  | Meles leucurus NC039173 4            | 0,18765357 |
| Martes flavigula NC012141 3          | Cryptoprocta ferox FC13 1            | 0,18765412 |
| Procyon lotor AB462049 4             | Attilax paludinosus T606 1           | 0,18765475 |
| Cynictis penicillata T375 1          | Aonyx cinerea NC035814 2             | 0,18765499 |
| Mustela itatsi NC034330 19           | Mungotictis decemlineata NC027828 1  | 0,1876561  |
| Salanoia concolor D378 1             | Arctocepalus forsteri KT69337 17     | 0,18765651 |
| Otocolobus manul NC028323 1          | Tapirus terrestris T358              | 0,18765669 |
| Spilogale putorius NC010497 1        | Leopardus colocolo NC028314 1        | 0,1876588  |
| Zalophus californianus NC008416 1    | Ura javanica/auropunctata NC006835   | 0,18765882 |
| Paradoxurus hermaphroditus NC03959   | Melogale moschata KP726273 1         | 0,18765973 |
| Otocyon megalotis SAF 1 2            | Fossa fossana D350 1                 | 0,18766041 |
| Spilogale putorius NC010497 1        | Canis aureus KT448274 1              | 0,1876619  |
| Ursus arctos GU573491 207            | Lutra lutra LC050126 1               | 0,18766247 |
| Viverra tangalunga MH464792 1        | Panthera uncia NC010638 1            | 0,18766294 |
| Panthera pardus japonensis KJ866876  | Mustela sibirica AP017394 11         | 0,1876633  |
| Nyctereutes procyonoides NC013700 3  | Arctotherium sp NC030174 1           | 0,18766344 |
| Catopuma badia NC028300 1            | Arctocepalus townsendi NC008420 1    | 0,18766348 |
| Vulpes ferrillata NC027935 1         | Lynx canadensis NC028313 1           | 0,18766506 |
| Vulpes lagopus NC026529 3            | Caracal caracal NC028306 1           | 0,18766589 |
| Lontra canadensis SRR10409165 1      | Catopuma temminckii NC027115 41      | 0,18766661 |
| Lontra canadensis SRR10409165 1      | Felis catus NC001700 2               | 0,18766682 |
| Urocyon cinereoargenteus NC026723 2  | Leopardus wiedii NC028318 1          | 0,18766697 |
| Neophoca cinerea NC008419 1          | Felis catus NC001700 2               | 0,1876681  |
| Vulpes lagopus NC026529 3            | Leopardus guigna NC028321 1          | 0,18766874 |
| Viverra tangalunga MH464792 1        | Panthera tigris NC010642 35          | 0,18767259 |
| Panthera tigris amoyensis NC014770 2 | Martes melampus NC009678 1           | 0,18767264 |
| Panthera pardus japonensis KJ866876  | Otocyon megalotis SAF 2              | 0,18767448 |
| Martes zibellina NC011579 39         | Arctictis binturong T605 2           | 0,18767537 |
| Speothos venaticus C48 2             | Genetta abyssinica MG489822 1        | 0,18767592 |
| Ursus maritimus GU573488 Svalbard    | Lynx rufus NC014456 3                | 0,18767595 |
| Ursus arctos isabellinus 1885 2      | Leopardus wiedii NC028318 1          | 0,18767628 |
| Galictis vittata T412 1              | Arctocepalus gazella BK100918 1      | 0,18767653 |
| Ursus arctos isabellinus 1885 2      | Prionailurus viverrinus NC028305 1   | 0,18767688 |
| Ursus maritimus NC003428 31          | Prionailurus planiceps KY682741 4    | 0,18767707 |
| Helarctos malayanus NC009968 2       | Bdeogale nigripes GLC15 1            | 0,18767715 |
| Neophoca cinerea NC008419 1          | Ailuropoda malanoleuca NC009492 5    | 0,18767773 |
| Salanoia concolor D378 1             | Melurus ursinus NC009970 2           | 0,18767777 |
| Prionodon linsang ERR2391707 1       | Helarctos malayanus NC009968 2       | 0,18767844 |
| Ursus arctos pruinus MG066703 3      | Puma yagouaroundi NC028311 1         | 0,18767852 |
| Ursus maritimus GU573488 Svalbard    | Leptailurus serval NC028316 1        | 0,18767852 |
| Martes foina NC020643 1              | Hyaena hyaena NC020669 1             | 0,18767911 |
| Speothos venaticus C48 2             | Felis chaus NC028307 1               | 0,1876794  |
| Panthera pardus japonensis KJ866876  | Urocyon striatus T299 1              | 0,18768054 |
| Ursus arctos pruinus MG066703 3      | Prionailurus bengalensis CKM45 20    | 0,18768141 |
| Suricata suricatta SSM10 1           | Canis lupus chanco NC010340 4        | 0,1876817  |
| Ursus thibetanus formosanus NC009331 | Otocyon megalotis SAF 2              | 0,18768302 |
| Ursus arctos GU573486 5              | Prionailurus planiceps KY682741 4    | 0,18768327 |
| Panthera tigris amoyensis NC014770 2 | Martes martes T302 3                 | 0,18768351 |
| Ursus arctos GU573486 5              | Caracal caracal NC028306 1           | 0,18768473 |
| Puma yagouaroundi NC028311 1         | Mephitis mephitis NC020648 1         | 0,18768486 |
| Mungotictis decemlineata NC027828    | Canis lupus familiaris NC002008 1231 | 0,18769008 |
| Mephitis mephitis NC020648 1         | Catopuma badia NC028300 1            | 0,18769079 |
| Melogale moschata NC020644 1         | Canis aureus KT448274 1              | 0,18769184 |
| Spilogale putorius NC010497 1        | Genetta abyssinica MG489822 1        | 0,18769205 |
| Zalophus wolfebaeki SRR4431565 1     | Panthera onca NC022842 1             | 0,18769208 |
| Xenogale naso C07XAR110 1            | Gulo gulo NC009685 3                 | 0,18769261 |
| Zalophus californianus NC008416 1    | Panthera uncia KP202269 1            | 0,18769434 |
| Lutra sumatrana NC035810 1           | Canis lupus chanco NC010340 4        | 0,18769683 |
| Ursus arctos AP012576 6              | Catopuma badia NC028300 1            | 0,18769698 |
| Panthera leo NERO 19                 | Mustela itatsi NC034330 19           | 0,18769836 |
| Cuon alpinus NC013445 3              | Ailuropus fulgens styani NC009691 1  | 0,18770193 |
| Cynogale bennetti KY117544 1         | Tapirus terrestris T358              | 0,18770285 |
| Panthera tigris NC010642 35          | Canis lupus chanco NC010340 4        | 0,187703   |
| Mungos mungo/gambianus SRR77048      | Cuon alpinus NC013445 3              | 0,18770494 |
| Canis mesomelas KT448280 1           | Bassariscus sumichrasti SRX1099089 1 | 0,18770567 |
| Caracal caracal NC028306 1           | Arctocepalus forsteri NC004023 28    | 0,18770693 |
| Vulpes vulpes NC008434 5             | Panthera pardus NC010641 5           | 0,18770702 |
| Ursus americanus JX196366 3          | Prionailurus planiceps KY682741 4    | 0,18770841 |
| Urocyon cinereoargenteus NC026723 2  | Martes flavigula NC012141 3          | 0,18770845 |
| Ursus americanus JX196366 3          | Aonyx cinerea NC035814 2             | 0,18770881 |
| Panthera pardus NC010641 5           | Canis latrans NC008093 7             | 0,18770885 |
| Gulo gulo NC009685 3                 | Chrysoyon brachyurus NC024172 1      | 0,18770987 |
| Lutra sumatrana NC035810 1           | Helogale panula SRR7637809 1         | 0,18771388 |
| Nasua nasua NC020647 1               | Homotherium latidens MF871702 3      | 0,18771434 |
| Attilax paludinosus T606 1           | Tapirus terrestris T358              | 0,18771612 |
| Tremarctos ornatus NC009969 2        | Mungos mungo/gambianus SRR77048      | 0,1877186  |
| Salanoia concolor D378 1             | Lontra canadensis SRR10409165 1      | 0,1877189  |
| Urocyon cinereoargenteus NC026723 2  | Nandinia binotata NC024567 1         | 0,18772025 |
| Suricata suricatta SSM10 1           | Canis latrans NC008093 7             | 0,18772033 |
| Prionodon linsang ERR2391707 1       | Mustela sibirica AP017394 11         | 0,18772107 |

|                                        |                                      |            |
|----------------------------------------|--------------------------------------|------------|
| Ursus maritimus GU573488 Svalbard      | Leptonychotes weddellii NC008424 1   | 0,16692467 |
| Pusa hispida NC 008433 1               | Martes martes T302 3                 | 0,16692841 |
| Phoca fasciata NC008428 1              | Martes foina NC020643 1              | 0,16693164 |
| Ursus spelaeus EU0327344 13            | Cystophora cristata NC008427 1       | 0,16693674 |
| Leptonychotes weddellii NC008424 1     | Gulo gulo NC009685 3                 | 0,16694324 |
| Melursus ursinus NC009970 2            | Lobodon carcinophaga NC008423 1      | 0,16695121 |
| Lobodon carcinophaga NC008423 1        | Leopardus colocolo NC028314 1        | 0,16695252 |
| Lobodon carcinophaga NC008423 1        | Gulo gulo NC009685 3                 | 0,16695632 |
| Pusa caspica NC008431 1                | Lutra lutra LC050126 1               | 0,16697496 |
| Mustela eversmannii NC028013 1         | Leptonychotes weddellii NC008424 1   | 0,16697614 |
| Mustela kathiah NC023210 1             | Cystophora cristata NC008427 1       | 0,16697849 |
| Fossa fossana D350 1                   | Cystophora cristata NC008427 1       | 0,16698088 |
| Martes zibellina NC011579 39           | Bassaricyon neblina SRX1097850 1     | 0,16698122 |
| Viverra tangalunga MH464792 1          | Procyon lotor AB462049 4             | 0,16698197 |
| Phoca fasciata NC008428 1              | Mustela kathiah NC023210 1           | 0,16698727 |
| Phoca largha NC008430 1                | Arctonyx collaris NC020645 1         | 0,16698922 |
| Lynx pardinus NC028319 161             | Leptonychotes weddellii NC008424 1   | 0,16698942 |
| Melogale moschata KP726273 1           | Lobodon carcinophaga NC008423 1      | 0,16699031 |
| Ursus thibetanus mupinensis NC008753 2 | Erigonathus barbatus NC008426 1      | 0,16699222 |
| Pusa sibirica NC008432 2               | Melursus ursinus NC009970 2          | 0,16700134 |
| Leopardus guigna NC028321 1            | Hydrurga leptonyx NC008425 1         | 0,16700324 |
| Lutra lutra LC050126 1                 | Halichoerus grypus NC001602 2        | 0,16702454 |
| Lutra lutra LC050126 1                 | Erigonathus barbatus NC008426 1      | 0,1670391  |
| Tremarctos ornatus NC009969 2          | Pusa sibirica NC008432 2             | 0,16704278 |
| Pusa caspica NC008431 1                | Meles leucurus NC039173 4            | 0,16704349 |
| Pusa sibirica NC008432 2               | Mustela frenata NC020640 1           | 0,1670491  |
| Martes pennanti NC020664 16            | Bassaricyon sumichrasti SRX1099089 1 | 0,16705482 |
| Phoca groenlandica NC008429 54         | Mustela kathiah NC023210 1           | 0,16705528 |
| Mirounga angustirostris SRR10331586 1  | Arctonyx collaris NC020645 1         | 0,16705611 |
| Lynx canadensis NC028313 1             | Leptonychotes weddellii NC008424 1   | 0,16705631 |
| Lynx rufus NC014456 3                  | Leptonychotes weddellii NC008424 1   | 0,16705658 |
| Procyon lotor AB462049 4               | Mustela altaica NC021751 1           | 0,16705814 |
| Otocolobus manul NC028323 1            | Leptonychotes weddellii NC008424 1   | 0,16705862 |
| Viverricula indica NC025296 2          | Erigonathus barbatus NC008426 1      | 0,16706184 |
| Ursus thibetanus laniger MH281753 2    | Leptonychotes weddellii NC008424 1   | 0,16706926 |
| Pusa hispida NC 008433 1               | Melursus ursinus NC009970 2          | 0,16708311 |
| Procyon lotor AB462046 3               | Martes flavigula NC012141 3          | 0,16709059 |
| Pusa sibirica NC008432 2               | Martes melampus NC009678 1           | 0,16710927 |
| Helogale parvula SRR7637809 1          | Cynogale bennetti KY117544 1         | 0,16711384 |
| Martes martes T302 3                   | Cystophora cristata NC008427 1       | 0,16711763 |
| Mustela erminea T305 2                 | Ailurus fulgens styani NC009691 1    | 0,16711819 |
| Phoca vitulina NC001325 1              | Arctonyx collaris NC020645 1         | 0,16712391 |
| Mirounga angustirostris SRR10331586 1  | Meles anakuma NC009677 1             | 0,16712455 |
| Helarctos malayanus NC009968 2         | Erigonathus barbatus NC008426 1      | 0,16713782 |
| Leptonychotes weddellii NC008424 1     | Helarctos malayanus NC009968 2       | 0,16713873 |
| Leptonychotes weddellii NC008424 1     | Acinonyx jubatus NC005212 3          | 0,16714139 |
| Ursus thibetanus laniger MH281753 2    | Lobodon carcinophaga NC008423 1      | 0,16715141 |
| Ursus spelaeus EU327344 13             | Lobodon carcinophaga NC008423 1      | 0,16715349 |
| Panthera tigris NC010642 35            | Cynogale bennetti KY117544 1         | 0,16712722 |
| Lutra lutra NC011358 9                 | Erigonathus barbatus NC008426 1      | 0,16717324 |
| Procyon lotor AB462049 4               | Meles anakuma NC009677 1             | 0,16718039 |
| Meles leucurus NC039173 4              | Ailurus fulgens styani NC009691 1    | 0,16718398 |
| Procyon lotor AB462049 4               | Mustela putorius NC020638 4          | 0,16718437 |
| Procyon lotor AB462049 4               | Martes zibellina NC011579 39         | 0,16718736 |
| Tremarctos ornatus NC009969 2          | Pusa hispida NC 008433 1             | 0,16719019 |
| Lynx lynx NC027083 4                   | Leptonychotes weddellii NC008424 1   | 0,16719085 |
| Viverricula indica XK891751 1          | Leptonychotes weddellii NC008424 1   | 0,16719213 |
| Viverricula indica XK891751 1          | Hydrurga leptonyx NC008425 1         | 0,16719958 |
| Ursus thibetanus thibetanus NC011118 4 | Erigonathus barbatus NC008426 1      | 0,16720651 |
| Mellivora capensis T370 1              | Arctonyx collaris NC020645 1         | 0,16723871 |
| Mustela frenata NC020640 1             | Ailurus fulgens styani NC009691 1    | 0,16724752 |
| Martes melampus NC009678 1             | Bassaricyon neblina SRX1097850 1     | 0,16724787 |
| Procyon lotor AB462046 3               | Martes melampus NC009678 1           | 0,16724868 |
| Pusa sibirica NC008432 2               | Martes martes T302 3                 | 0,16725308 |
| Phoca vitulina NC001325 1              | Lutra lutra LC011358 9               | 0,16725639 |
| Mustela nivalis T306 5                 | Hydrurga leptonyx NC008425 1         | 0,16726714 |
| Prionailurus planiceps NC028312 6      | Hydrurga leptonyx NC008425 1         | 0,16726974 |
| Phoca groenlandica NC008429 54         | Melursus ursinus NC009970 2          | 0,16727899 |
| Leptonychotes weddellii NC008424 1     | Hemigalus derbyanus MH464791 1       | 0,16729271 |
| Pusa caspica NC008431 1                | Martes melampus NC009678 1           | 0,16731091 |
| Melogale moschata NC020644 1           | Leptonychotes weddellii NC008424 1   | 0,167317   |
| Procyon lotor AB462049 4               | Mustela kathiah NC023210 1           | 0,1673182  |
| Procyon lotor AB462046 3               | Mustela kathiah NC023210 1           | 0,16731825 |
| Tremarctos ornatus NC009969 2          | Phoca groenlandica NC008429 54       | 0,16731925 |
| Mustela kathiah NC023210 1             | Hydrurga leptonyx NC008425 1         | 0,16732365 |
| Phoca largha NC008430 1                | Martes melampus NC009678 1           | 0,16732381 |
| Mustela eversmannii NC028013 1         | Lobodon carcinophaga NC008423 1      | 0,1673245  |
| Leptonychotes weddellii NC008424 1     | Felis catus NC001700 2               | 0,16732654 |
| Viverricula indica XK891751 1          | Erigonathus barbatus NC008426 1      | 0,16732675 |
| Homotherium latidens MF871702 3        | Erigonathus barbatus NC008426 1      | 0,1673294  |
| Pusa hispida NC 008433 1               | Melogale moschata NC020644 1         | 0,16733241 |
| Ursus arctos GU573486 5                | Cystophora cristata NC008427 1       | 0,16733387 |
| Mustela altaica NC021751 1             | Hydrurga leptonyx NC008425 1         | 0,16733557 |
| Hydrurga leptonyx NC008425 1           | Catopuma badia NC028300 1            | 0,16733646 |
| Lynx canadensis NC028313 1             | Hydrurga leptonyx NC008425 1         | 0,16733758 |
| Hydrurga leptonyx NC008425 1           | Caracal caracal NC028306 1           | 0,167338   |
| Ursus thibetanus formosanus NC009331 1 | Phoca fasciata NC008428 1            | 0,16734514 |
| Phoca largha NC008430 1                | Melursus ursinus NC009970 2          | 0,16734979 |
| Phoca vitulina NC001325 1              | Melursus ursinus NC009970 2          | 0,16734998 |
| Ursus thibetanus thibetanus NC011118 4 | Pusa hispida NC 008433 1             | 0,16735354 |
| Leptonychotes weddellii NC008424 1     | Civettictis civetta NC033378 1       | 0,16736454 |
| Ommatophoca rossii AY377287etc 1       | Mustela erminea T305 2               | 0,1673733  |
| Pusa sibirica NC008432 2               | Lutra lutra LC050126 1               | 0,16737914 |
| Melogale moschata KP726273 1           | Leptonychotes weddellii NC008424 1   | 0,16738011 |
| Procyon lotor AB462049 4               | Lutra sumatrana NC035810 1           | 0,16738382 |
| Phoca fasciata NC008428 1              | Martes melampus NC009678 1           | 0,16738497 |
| Arctonyx collaris NC020645 1           | Ailurus fulgens styani NC009691 1    | 0,16738603 |
| Monachus schauinslandi NC008421 1      | Lutra sumatrana NC035810 1           | 0,16738866 |
| Phoca largha NC008430 1                | Martes americana NC020642 1          | 0,16739455 |
| Lobodon carcinophaga NC008423 1        | Ailurus fulgens styani NC009691 1    | 0,16739476 |
| Leptonychotes weddellii NC008424 1     | Civettictis civetta GLC19 1          | 0,16739503 |
| Martes zibellina NC011579 39           | Lobodon carcinophaga NC008423 1      | 0,16739509 |
| Monachus monachus NC044972 5           | Ailurus fulgens styani NC009691 1    | 0,16742398 |

|                                        |                                      |            |
|----------------------------------------|--------------------------------------|------------|
| Prionodon linsang ERR2391707 1         | Mustela nigripes NC024942 1          | 0,18772162 |
| Mungos mungo/gambianus SRR77048        | Melogale moschata NC020644 1         | 0,18772237 |
| Canis latrans NC008093 7               | Ailurus fulgens styani NC009691 1    | 0,18772589 |
| Lynx lynx NC027083 4                   | Tapirus terrestris T358              | 0,18772604 |
| Mustela eversmannii NC028013 1         | Galerella sanguinea T378 1           | 0,18772693 |
| Lutrogale perspicillata NC035811 1     | Leopardus wiedii NC028318 1          | 0,18772785 |
| Ommatophoca rossii AY377287etc 1       | Crocota crocata NC020670 3           | 0,18772811 |
| Prionailurus planiceps NC028312 6      | Conepatus chinga NC042596 1          | 0,18772899 |
| Mustela nivalis T306 5                 | Bdeogale nigripes GLC15 1            | 0,187729   |
| Ursus maritimus NC003428 31            | Lutra lutra NC011358 9               | 0,18772942 |
| Phoca vitulina NC001325 1              | Cynogale bennetti KY117544 1         | 0,18772969 |
| Otocyon megalotis SAF1 2               | Martes americana NC020642 1          | 0,18772988 |
| Viverra tangalunga MH464792 1          | Hyaena hyaena NC020669 1             | 0,18773036 |
| Vulpes vulpes NC008434 5               | Panthera onca KP202264 2             | 0,1877315  |
| Caracal caracal NC028306 1             | Arctocepalus townsendi NC008420 1    | 0,18773153 |
| Paradoxurus jerdoni MH464793 1         | Neophoca cinerea NC008419 1          | 0,18773282 |
| Vulpes ferrillata NC027935 1           | Caracal caracal NC028306 1           | 0,18773311 |
| Urocyon cinereoargenteus NC026723 2    | Prionailurus rubiginosus NC028304 2  | 0,18773498 |
| Ursus maritimus GU573488 Svalbard      | Hyaena hyaena NC020669 1             | 0,18773599 |
| Ursus maritimus GU573488 Svalbard      | Procyon lotor AB462049 4             | 0,187736   |
| Ursus arctos EU497665 29               | Procyon lotor AB462049 4             | 0,18773605 |
| Ursus arctos GU573486 5                | Lutra lutra LC050126 1               | 0,18773665 |
| Parahyaena brunnea NC038159 15         | Otaria byronia OTAB 1                | 0,18773694 |
| Odobenus rosmarus NC004029 29          | Homotherium latidens MF871702 3      | 0,18773727 |
| Crocota crocata NC020670 3             | Bassaricyon sumichrasti SRX1099089 1 | 0,18773735 |
| Panthera tigris amoyensis NC014770 2   | Arctonyx collaris NC020645 1         | 0,18773781 |
| Panthera onca NC022842 1               | Meles anakuma NC009677 1             | 0,18773919 |
| Leopardus pardalis NC028315 1          | Bassaricyon neblina SRX1097850 1     | 0,18773977 |
| Felis chaus NC028307 1                 | Arctotherium sp NC030174 1           | 0,18774033 |
| Panthera onca KP202264 2               | Martes pennanti NC020664 16          | 0,18774037 |
| Zalophus wolfebaeki SRR4431565 1       | Mungotictis decemlineata NC027828 1  | 0,18774109 |
| Vulpes corsac NC023958 1               | Helarctos malayanus NC009968 2       | 0,18774191 |
| Spilogale putorius NC010497 1          | Canis lupus chanco NC010340 4        | 0,18774216 |
| Speothos venaticus C48 2               | Genetta servalina NC024568 2         | 0,18774249 |
| Ursus thibetanus thibetanus NC011118 4 | Bdeogale nigripes GLC15 1            | 0,18774417 |
| Martes martes T302 3                   | Chrysocyon brachyurus NC024172 1     | 0,18774445 |
| Ursus arctos pruinosus MG066703 3      | Prionailurus planiceps NC028301 12   | 0,18774576 |
| Speothos venaticus C48 2               | Prionailurus bengalensis KY682741 4  | 0,18774605 |
| Ursus arctos pruinosus MG066703 3      | Paguma larvata PDS11 2               | 0,18774718 |
| Lycalopex schuarex KT448284 1          | Crossarchus platycephalus C7R66 1    | 0,18774793 |
| Procyon lotor AB462046 3               | Panthera onca NC022842 1             | 0,18774895 |
| Taxidea taxus NC020646 1               | Proteles cristata T393 6             | 0,18775025 |
| Ursus arctos GU573486 5                | Prionailurus rubiginosus NC028301 12 | 0,18775189 |
| Viverricula indica NC025296 2          | Galictis vittata T412 1              | 0,18775559 |
| Mephitis mephitis NC020648 1           | Arctocepalus pusillus NC008417 1     | 0,18775661 |
| Zalophus californianus NC008416 1      | Mungotictis decemlineata NC027828 1  | 0,18775716 |
| Ursus arctos AP012576 6                | Profelis aurata NC028299 1           | 0,18775873 |
| Zalophus californianus NC008416 1      | Galerella sanguinea T378 1           | 0,18776149 |
| Ursus arctos GU573491 207              | Leopardus colocolo NC028314 1        | 0,18776298 |
| Mungos mungo MMC7 1                    | Cuon alpinus NC013445 3              | 0,1877635  |
| Viverra tangalunga MH464792 1          | Panthera leo NER0 19                 | 0,18776512 |
| Ailurodon melanoleuca NC009492 5       | Acinonyx jubatus NC005212 3          | 0,18776619 |
| Ursus spelaeus EU327344 13             | Canis aureus KT448274 1              | 0,18776637 |
| Panthera leo spelaeus KX258452 2       | Canis aureus KT448274 1              | 0,18776932 |
| Felis margarita NC028308 1             | Arctocepalus forsteri NC004023 28    | 0,18777257 |
| Ursus thibetanus laniger MH281753 2    | Lycalopex schuarex KT448284 1        | 0,18777269 |
| Ursus americanus JX196366 3            | Paradoxurus hermaphroditus NLLNC 1   | 0,18777525 |
| Lycalopex schuarex KT448284 1          | Leopardus jacobita NC028322 1        | 0,18777584 |
| Lycalopex schuarex KT448284 1          | Diplogale hosei MH464790 1           | 0,18777955 |
| Felis chaus NC028307 1                 | Eumetopias jubatus NC004030 10       | 0,18778105 |
| Mungos mungo/gambianus SRR77048        | Martes americana NC020642 1          | 0,1877829  |
| Martes zibellina NC011579 39           | Urva brachyura KY117547 1            | 0,1877843  |
| Vulpes vulpes NC008434 5               | Melogale moschata V0735A 1           | 0,18778525 |
| Xenogale naso C07XAR110 1              | Arctocepalus forsteri KT693377 17    | 0,18778585 |
| Vulpes lagopus NC026529 3              | Cynictis penicillata T375 1          | 0,18778652 |
| Vulpes lagopus NC026529 3              | Galerella sanguinea T378 1           | 0,18778652 |
| Urva semitorquata MH464789 1           | Ailurus fulgens styani NC009691 1    | 0,18778661 |
| Parahyaena brunnea NC038159 15         | Martes flavigula NC012141 3          | 0,18778685 |
| Helogale parvula SRR7637809 1          | Canis latrans NC008093 7             | 0,18778709 |
| Xenogale naso C07XAR110 1              | Bassaricyon neblina SRX1097850 1     | 0,18778747 |
| Eupleres goodii D128 1                 | Aonyx cinerea NC035814 2             | 0,18778801 |
| Urva javanica T413 1                   | Canis anthus NC027956 2              | 0,18778807 |
| Helogale parvula SRR7637809 1          | Aonyx cinerea NC035814 2             | 0,18778894 |
| Mungos mungo/gambianus SRR77048        | Aonyx cinerea NC035814 2             | 0,18778983 |
| Nyctereutes procyonoides NC013700 3    | Meles anakuma NC009677 1             | 0,18779024 |
| Paradoxurus hermaphroditus NLLNC 1     | Lutra sumatrana NC035810 1           | 0,18779038 |
| Helogale parvula SRR7637809 1          | Arctocepalus pusillus NC008417 1     | 0,18779039 |
| Vulpes zerdia KI603240 1               | Mustela sibirica NC020637 6          | 0,18779099 |
| Lynx pardinus NC028319 161             | Tapirus terrestris T358              | 0,18779208 |
| Melogale moschata NC020644 1           | Bdeogale nigripes GLC15 1            | 0,18779214 |
| Procyon lotor AB462046 3               | Ichneumia albicauda T603 1           | 0,18779396 |
| Suricata suricatta SSM10 1             | Arctotherium sp NC030174 1           | 0,18779409 |
| Galerella sanguinea T378 1             | Arctocepalus townsendi NC008420 1    | 0,18779466 |
| Lutra lutra LC050126 1                 | Chrysocyon brachyurus NC024172 1     | 0,18779548 |
| Eumetopias jubatus NC004030 10         | Ailurodon melanoleuca NC009492 5     | 0,18779565 |
| Vulpes vulpes NC008434 5               | Mustela altaica NC021751 1           | 0,18779586 |
| Lutra lutra LC050126 1                 | Arctictis binturong T605 2           | 0,18779626 |
| Smlidon populator MF871700 1           | Tapirus terrestris T358              | 0,18779628 |
| Vulpes corsac NC023958 1               | Mustela altaica NC021751 1           | 0,18779643 |
| Ursus arctos isabellinus 1885 2        | Lutra lutra LC050126 1               | 0,18779682 |
| Ursus maritimus GU573488 Svalbard      | Lutra lutra LC050126 1               | 0,18779717 |
| Catopuma temminckii NC027115 41        | Arctocepalus townsendi NC008420 1    | 0,18779817 |
| Ursus arctos isabellinus 1885 2        | Crossarchus platycephalus C7R66 1    | 0,18779829 |
| Salanoia pardus D378 1                 | Arctotherium sp NC030174 1           | 0,18779851 |
| Panthera pardus japonensis KI866876    | Mustela sibirica AP017394 11         | 0,18779853 |
| Panthera pardus japonensis KI866876    | Mustela itatsi NC034330 19           | 0,18779871 |
| Puma yagouaroundi NC028311 1           | Arctocepalus forsteri KT693377 17    | 0,18779922 |
| Vulpes ferrillata NC027935 1           | Mustela nivalis T306 5               | 0,18779936 |
| Lutra lutra LC050126 1                 | Crocota crocata NC020670 3           | 0,18779951 |
| Ursus thibetanus mupinensis NC008753 2 | Mungos mungo MMC7 1                  | 0,18779972 |
| Vulpes lagopus NC026529 3              | Leopardus jacobita NC028322 1        | 0,18780039 |
| Vulpes zerdia KI603240 1               | Neovison vivax NC020641 3            | 0,18780071 |
| Martes foina NC020643 1                | Diplogale hosei MH464790 1           | 0,18780117 |



|                                        |                                       |            |
|----------------------------------------|---------------------------------------|------------|
| Pusa hispida NC 008433 1               | Martes flavigula NC012141 3           | 0,16743805 |
| Mirounga leonina NC008422 1            | Enhydra lutris NC009692 1             | 0,16744143 |
| Martes zibellina NC011579 39           | Cystophora cristata NC008427 1        | 0,16744907 |
| Procyon lotor AB462049 4               | Martes melampus NC009678 1            | 0,16745007 |
| Taxidea taxus NC020646 1               | Aillurus fulgens styani NC009691 1    | 0,16745079 |
| Puma yagouaroundi NC028311 1           | Leptonychotes weddellii NC008424 1    | 0,16746233 |
| Ursus maritimus NC003428 31            | Cystophora cristata NC008427 1        | 0,16746247 |
| Leptonychotes weddellii NC008424 1     | Caracal caracal NC028306 1            | 0,16746254 |
| Phoca vitulina NC001325 1              | Martes martes T302 3                  | 0,16746474 |
| Mirounga angustirostris SRR10331586 1  | Arctotherium sp NC030174 1            | 0,16747066 |
| Hydrurga leptonyx NC008425 1           | Felis margarita NC028308 1            | 0,16747212 |
| Lynx lynx NC027083 4                   | Hydrurga leptonyx NC008425 1          | 0,16747215 |
| Cystophora cristata NC008427 1         | Arctonyx collaris NC020645 1          | 0,16751558 |
| Potos flavus T414 1                    | Melogale moschata KP726273 1          | 0,16751672 |
| Martes americana NC020642 1            | Bassaricyon neblina SRX1097850 1      | 0,16751942 |
| Meles meles T303 3                     | Aillurus fulgens styani NC009691 1    | 0,16752061 |
| Procyon lotor AB462049 4               | Mustela nigripes NC024942 1           | 0,16752087 |
| Procyon lotor AB462046 3               | Martes zibellina NC011579 39          | 0,16752408 |
| Phoca vitulina NC001325 1              | Meles meles T303 3                    | 0,16752703 |
| Potos flavus T414 1                    | Ictonyx striatus T299 1               | 0,16752756 |
| Leptonychotes weddellii NC008424 1     | Felis nigripes NC028309 1             | 0,16752879 |
| Leptonychotes weddellii NC008424 1     | Leopardus geoffroyi NC028320 1        | 0,16753179 |
| Monachus monachus NC044972 5           | Arctonyx collaris NC020645 1          | 0,16754477 |
| Phoca groenlandica NC008429 54         | Gulo gulo NC009685 3                  | 0,16756287 |
| Viverra zibellina MH464792 1           | Erigonathus barbatus NC008426 1       | 0,16758394 |
| Mustela eversmannii NC028013 1         | Hydrurga leptonyx NC008425 1          | 0,1675936  |
| Lobodon carcinophaga NC008423 1        | Aillurus fulgens NC011124 1           | 0,16759692 |
| Potos flavus T414 1                    | Phoca largha NC008430 1               | 0,16760148 |
| Pusa caspica NC008431 1                | Melursus ursinus NC009970 2           | 0,16760743 |
| Lobodon carcinophaga NC008423 1        | Leopardus pardalis NC028315 1         | 0,16760787 |
| Tremarctos ornatus NC009969 2          | Monachus monachus NC044972 5          | 0,16761616 |
| Pusa hispida NC 008433 1               | Helarctos malayanus NC009968 2        | 0,16762063 |
| Phoca fasciata NC008428 1              | Gulo gulo NC009685 3                  | 0,16762993 |
| Pusa sibirica NC008432 2               | Arctonyx collaris NC020645 1          | 0,16765146 |
| Martes martes T302 3                   | Bassaricyon neblina SRX1097850 1      | 0,16766061 |
| Phoca largha NC008430 1                | Enhydra lutris NC009692 1             | 0,16766208 |
| Mirounga leonina NC008422 1            | Martes foina NC020643 1               | 0,16766341 |
| Puma concolor NC016470 22              | Leptonychotes weddellii NC008424 1    | 0,16766387 |
| Leopardus pardalis T262 1              | Cystophora cristata NC008427 1        | 0,16766788 |
| Prionailurus rubiginosus NC028304 2    | Lobodon carcinophaga NC008423 1       | 0,16767392 |
| Ursus thibetanus formosanus NC009331 1 | Cystophora cristata NC008427 1        | 0,16767451 |
| Helarctos malayanus NC009968 2         | Cystophora cristata NC008427 1        | 0,16767554 |
| Ursus arctos GU573486 5                | Phoca fasciata NC008428 1             | 0,16767746 |
| Ictonyx striatus T299 1                | Hydrurga leptonyx NC008425 1          | 0,16767806 |
| Leptonychotes weddellii NC008424 1     | Canis adustus KT448271 1              | 0,1676791  |
| Ursus thibetanus laniger MH281753 2    | Mirounga angustirostris SRR10331586 1 | 0,16768952 |
| Hydrurga leptonyx NC008425 1           | Helarctos malayanus NC009968 2        | 0,16769214 |
| Meles meles T303 3                     | Halichoerus grypus NC001602 2         | 0,16769668 |
| Phoca largha NC008430 1                | Martes flavigula NC012141 3           | 0,167712   |
| Meles anakuma NC009677 1               | Cystophora cristata NC008427 1        | 0,16771646 |
| Prionodon linsang ERR2391707 1         | Hyaena hyaena NC020669 1              | 0,16772407 |
| Pusa caspica NC008431 1                | Martes martes T302 3                  | 0,16772412 |
| Martes pennanti NC020664 16            | Cystophora cristata NC008427 1        | 0,16772421 |
| Procyon lotor AB462049 4               | Martes americana NC020642 1           | 0,16772546 |
| Phoca vitulina NC001325 1              | Meles leucurus NC039173 4             | 0,16772851 |
| Phoca largha NC008430 1                | Melogale moschata KP726273 1          | 0,16773047 |
| Hydrurga leptonyx NC008425 1           | Aillurus fulgens NC011124 1           | 0,16773134 |
| Monachus schauinslandi NC008421 1      | Aillurus fulgens styani NC009691 1    | 0,1677321  |
| Monachus schauinslandi NC008421 1      | Homotherium latidens MF871702 3       | 0,16773877 |
| Ursus thibetanus thibetanus NC011118 4 | Pusa sibirica NC008432 2              | 0,16774411 |
| Ursus thibetanus thibetanus NC011118 4 | Cystophora cristata NC008427 1        | 0,16774482 |
| Gulo gulo NC009685 3                   | Cystophora cristata NC008427 1        | 0,16775656 |
| Mellivora capensis T370 1              | Meles anakuma NC009677 1              | 0,16777111 |
| Pusa caspica NC008431 1                | Arctonyx collaris NC020645 1          | 0,16778757 |
| Mustela erminea T305 2                 | Bassaricyon neblina SRX1097850 1      | 0,1677884  |
| Procyon lotor AB462046 3               | Mustela sibirica NC020637 6           | 0,16779007 |
| Melogale moschata NC020644 1           | Cystophora cristata NC008427 1        | 0,16779117 |
| Procyon lotor AB462046 3               | Leptonychotes weddellii NC008424 1    | 0,16779165 |
| Pusa hispida NC 008433 1               | Enhydra lutris NC009692 1             | 0,16779432 |
| Melursus ursinus NC009970 2            | Halichoerus grypus NC001602 2         | 0,16779502 |
| Mustela altaica NC021751 1             | Leptonychotes weddellii NC008424 1    | 0,16779549 |
| Phoca largha NC008430 1                | Meles meles T303 3                    | 0,16779618 |
| Melogale moschata KP726273 1           | Hydrurga leptonyx NC008425 1          | 0,16779773 |
| Phoca largha NC008430 1                | Martes zibellina NC011579 39          | 0,16779871 |
| Phoca fasciata NC008428 1              | Melogale moschata NC020644 1          | 0,16779914 |
| Ursus maritimus GU573488 Svalbard      | Cystophora cristata NC008427 1        | 0,16779917 |
| Phoca fasciata NC008428 1              | Aonyx cinerea NC035814 2              | 0,16780041 |
| Ursus thibetanus thibetanus NC011118 4 | Phoca largha NC008430 1               | 0,16782285 |
| Melursus ursinus NC009970 2            | Hydrurga leptonyx NC008425 1          | 0,16782659 |
| Pusa sibirica NC008432 2               | Martes americana NC020642 1           | 0,16785313 |
| Mungos mungo/gambianus SRR7704821 1    | Leptonychotes weddellii NC008424 1    | 0,16785619 |
| Leptonychotes weddellii NC008424 1     | Aillurus fulgens styani NC009691 1    | 0,16785702 |
| Mirounga angustirostris SRR10331586 1  | Enhydra lutris NC009692 1             | 0,16785744 |
| Phoca groenlandica NC008429 54         | Lutra sumatrana NC035810 1            | 0,16785897 |
| Neovison vison NC020641 3              | Mirounga leonina NC008422 1           | 0,16786303 |
| Lobodon carcinophaga NC008423 1        | Hemigalus derbyanus MH464791 1        | 0,16786328 |
| Leptonychotes weddellii NC008424 1     | Felis margarita NC028308 1            | 0,16786563 |
| Lobodon carcinophaga NC008423 1        | Fossa fossana D350 1                  | 0,16786596 |
| Ursus thibetanus mupinensis NC008753 2 | Cystophora cristata NC008427 1        | 0,16786689 |
| Pusa hispida NC 008433 1               | Bassaricyon sumichrasti SRX1099089 1  | 0,16786702 |
| Ursus arctos GU573491 207              | Leptonychotes weddellii NC008424 1    | 0,16786733 |
| Neofelis nebulosa NC008450 3           | Cynogale bennetti KY117544 1          | 0,16787507 |
| Prionailurus bengalensis NC028301 12   | Lobodon carcinophaga NC008423 1       | 0,16787566 |
| Otocolobus manul NC028323 1            | Lobodon carcinophaga NC008423 1       | 0,16787572 |
| Lynx pardinus NC028319 161             | Hydrurga leptonyx NC008425 1          | 0,16787614 |
| Melursus ursinus NC009970 2            | Erigonathus barbatus NC008426 1       | 0,16787821 |
| Lobodon carcinophaga NC008423 1        | Leopardus geoffroyi NC028320 1        | 0,16787888 |
| Ursus thibetanus laniger MH281753 2    | Pusa hispida NC 008433 1              | 0,16788945 |
| Pusa caspica NC008431 1                | Gulo gulo NC009685 3                  | 0,16789354 |
| Spilogale putorius NC010497 1          | Leptonychotes weddellii NC008424 1    | 0,16789806 |
| Ursus spelaeus NC011112 8              | Monachus schauinslandi NC008421 1     | 0,16789861 |
| Phoca largha NC008430 1                | Gulo gulo NC009685 3                  | 0,16790618 |
| Pusa sibirica NC008432 2               | Meles leucurus NC039173 4             | 0,16791894 |

|                                        |                                       |            |
|----------------------------------------|---------------------------------------|------------|
| Mustela altaica NC021751 1             | Mungotictis decemlineata NC027828 1   | 0,18780144 |
| Tremarctos ornatus NC009969 2          | Otocolobus manul NC028323 1           | 0,18780179 |
| Spilogale putorius NC010497 1          | Canis lupus familiaris NC002008 1231  | 0,18780288 |
| Martes pennanti NC020664 16            | Cryptoprocta ferox CFC13 1            | 0,18780342 |
| Viverricula indica KX891751 1          | Arctocepalus pusillus NC008417 1      | 0,18780358 |
| Ursus semitorquatus MH464789 1         | Chrysocyon brachyurus NC024172 1      | 0,18780404 |
| Arctocepalus forsteri KT693377 17      | Ailuropoda melanoleuca NC009492 5     | 0,18780443 |
| Otocyon megalotis SAF1 2               | Arctodus simus NC011116 1             | 0,1878057  |
| Panthera pardus japonensis KJ866876    | Bassaricyon sumichrasti SRX1099089 1  | 0,18780619 |
| Panthera tigris NC010642 35            | Melogale moschata V0735A 1            | 0,18780848 |
| Otaria byronia OTAB 1                  | Felis catus NC001700 2                | 0,18780856 |
| Panthera leo spelaea KX258452 2        | Aillurus fulgens styani NC009691 1    | 0,18780884 |
| Otocyon megalotis SAF1 2               | Leopardus guigna NC028321 1           | 0,18781066 |
| Ursus thibetanus laniger MH281753 2    | Bassaricyon neblina SRX1097850 1      | 0,18781188 |
| Ursus arctos EU497665 29               | Puma concolor NC016470 22             | 0,18781237 |
| Ursus arctos isabellinus 1885 2        | Puma yagouaroundi NC028311 1          | 0,1878124  |
| Ursus arctos GU573491 207              | Caracal caracal NC028306 1            | 0,18781286 |
| Ursus arctos GU573486 5                | Paradoxurus jerdoni MH464793 1        | 0,18781342 |
| Viverricula indica NC025296 2          | Ursus arctos pruinus MG066703 3       | 0,18781452 |
| Zalophus wolfebaeki SRR4431565 1       | Galerella sanguinea T378 1            | 0,18781483 |
| Ursus spelaeus EU327344 13             | Bassaricyon neblina SRX1097850 1      | 0,18781516 |
| Ursus arctos GU573486 5                | Leptailurus serval NC028316 1         | 0,18781954 |
| Ursus spelaeus NC011112 8              | Paradoxurus jerdoni MH464793 1        | 0,18782176 |
| Ursus spelaeus EU327344 13             | Paradoxurus hermaphroditus NLNC 1     | 0,18782201 |
| Ursus thibetanus thibetanus NC011118 4 | Prionodon pardicolor NC024569 2       | 0,18782343 |
| Ursus arctos AP012576 6                | Paguma larvata PDS11 2                | 0,18782356 |
| Mustela eversmannii NC028013 1         | Ursus javanicus/auropunctata NC006835 | 0,18782365 |
| Ursus javanicus/auropunctata NC006835  | Arctocepalus pusillus NC008417 1      | 0,18783486 |
| Canis lupus familiaris NC002008 1231   | Arctotherium sp NC030174 1            | 0,18783534 |
| Zalophus californianus NC008416 1      | Mephitis mephitis NC020648 1          | 0,18783678 |
| Galerella sanguinea T378 1             | Arctocepalus forsteri NC004023 28     | 0,18783948 |
| Crocota crocata NC020670 3             | Canis adustus KT448271 1              | 0,18784259 |
| Mellivora capensis T370 1              | Leptonychotes weddellii NC008424 1    | 0,18784736 |
| Diplogale hosei MH464790 1             | Callorhinus ursinus NC008415 1        | 0,18784952 |
| Mustela sibirica AP017394 11           | Bdeogale nigripes GLC15 1             | 0,18785298 |
| Phocarcotus hookeri NC008418 1         | Bassaricyon neblina SRX1097850 1      | 0,18785448 |
| Ursus arctos AP012576 6                | Spilogale putorius NC010497 1         | 0,18785648 |
| Vulpes lagopus NC026529 3              | Mustela nigripes NC024942 1           | 0,18785764 |
| Puma concolor NC016470 22              | Tapirus terrestris T358               | 0,18785772 |
| Viverra zibellina MH464792 1           | Galidictis fasciata DM333 1           | 0,18785778 |
| Vulpes corsac NC023958 1               | Mustela itarsi NC034330 19            | 0,18785778 |
| Suricata suricatta SSM10 1             | Martes pennanti NC020664 16           | 0,1878583  |
| Vulpes ferrillata NC027935 1           | Mustela itarsi NC034330 19            | 0,18785834 |
| Viverricula indica KX891751 1          | Arctocepalus australis MG023139 1     | 0,18785912 |
| Nyctereutes procyonoides NC013700 3    | Mustela kathian NC023210 1            | 0,18785913 |
| Ursus semitorquatus MH464789 1         | Arctotherium sp NC030174 1            | 0,18785974 |
| Prionodon linsang ERR2391707 1         | Melogale moschata NC020644 1          | 0,187861   |
| Pardofelis marmorata NLN3 2            | Aillurus fulgens NC011124 1           | 0,18786189 |
| Prionailurus planiceps KY682741 4      | Conepatus chinga NC042596 1           | 0,18786374 |
| Nyctereutes procyonoides NC013700 3    | Melogale moschata NC020644 1          | 0,18786381 |
| Ursus arctos pruinus MG066703 3        | Lutra lutra LC050126 1                | 0,1878649  |
| Conepatus chinga NC042596 1            | Catopuma badia NC028300 1             | 0,18786494 |
| Martes americana NC020642 1            | Hyaena hyaena NC020669 1              | 0,18786637 |
| Ursus thibetanus mupinensis NC008753 2 | Bdeogale nigripes GLC15 1             | 0,18786681 |
| Urocyon littoralis catalinae KP129018  | Lynx lynx NC027083 4                  | 0,18786785 |
| Nyctereutes procyonoides NC013700 3    | Mustela nivalis T306 5                | 0,18786792 |
| Melogale moschata NC020644 1           | Galerella sanguinea T378 1            | 0,18786873 |
| Meles leucurus NC039173 4              | Lycyon pictus NC028427 2              | 0,18786891 |
| Lynx lynx NC027083 4                   | Bassaricyon neblina SRX1097850 1      | 0,18786907 |
| Phocarcotus hookeri NC008418 1         | Leopardus jacobita NC028322 1         | 0,18787137 |
| Urocyon littoralis catalinae KP129018  | Catopuma temminckii NC027115 41       | 0,18787147 |
| Paradoxurus hermaphroditus NLNC 1      | Arctocepalus pusillus NC008417 1      | 0,18787202 |
| Panthera tigris amoyensis NC014770 2   | Enhydra lutris NC009692 1             | 0,18787208 |
| Lutrogale perspicillata NC035811 1     | Catopuma badia NC028300 1             | 0,18787226 |
| Mungos mungo/gambianus SRR7704821 1    | Chrysocyon brachyurus NC024172 1      | 0,18787272 |
| Panthera uncia KP202269 1              | Melogale moschata NC020644 1          | 0,18787448 |
| Chrysocyon brachyurus NC024172 1       | Chrotogale owstoni T607 1             | 0,18787491 |
| Ursus thibetanus mupinensis NC008753 2 | Galerella sanguinea T378 1            | 0,18787543 |
| Prionodon pardicolor NC024569 2        | Arctodus simus NC011116 1             | 0,18787605 |
| Ursus arctos GU573486 5                | Procyon lotor AB462049 4              | 0,18787703 |
| Ursus maritimus GU573488 Svalbard      | Lynx canadensis NC028313 1            | 0,18787786 |
| Ursus arctos isabellinus 1885 2        | Leopardus pardalis NC028315 1         | 0,18787791 |
| Ursus arctos pruinus MG066703 3        | Leopardus pardalis NC028315 1         | 0,18787852 |
| Ursus arctos pruinus MG066703 3        | Leopardus pardalis T262 1             | 0,18787871 |
| Ursus arctos AP012576 6                | Lutra lutra NC011358 9                | 0,18788044 |
| Ursus thibetanus mupinensis NC008753 2 | Paradoxurus hermaphroditus NLNC 1     | 0,18788095 |
| Ursus arctos pruinus MG066703 3        | Otaria byronia OTAB 1                 | 0,18788263 |
| Speothos venaticus C48 2               | Leopardus guigna NC028321 1           | 0,18788405 |
| Ursus thibetanus formosanus NC009331 1 | Cryptoprocta ferox CFC13 1            | 0,18788528 |
| Ursus spelaeus EU327344 13             | Panthera onca KP202264 2              | 0,18788721 |
| Ursus spelaeus NC011112 8              | Panthera pardus japonensis KJ866876   | 0,18789048 |
| Ursus arctos GU573491 207              | Ailuropoda melanoleuca NC009492 5     | 0,18789075 |
| Ursus spelaeus NC011112 8              | Prionailurus planiceps NC028312 6     | 0,18789251 |
| Ursus arctos NC011112 8                | Otocolobus manul NC028323 1           | 0,18789379 |
| Eumetopias jubatus NC004030 10         | Cynictis penicillata T375 1           | 0,18790044 |
| Ursus americanus JX193636 3            | Conepatus chinga NC042596 1           | 0,18790285 |
| Ursus javanicus/auropunctata NC006835  | Arctodus simus NC011116 1             | 0,18790461 |
| Gulo gulo NC009685 3                   | Genetta genetta T297 1                | 0,18790588 |
| Ursus arctos AP012576 6                | Galictis vittata T412 1               | 0,18790588 |
| Panthera pardus NC010641 5             | Mustela putorius NC020638 4           | 0,18790719 |
| Spilogale putorius NC010497 1          | Prionailurus bengalensis NC028301 12  | 0,18790729 |
| Ursus americanus JX193636 3            | Genetta genetta T297 1                | 0,18790904 |
| Panthera leo NERO 19                   | Mustela nivalis T306 5                | 0,18790984 |
| Suricata suricatta SSM10 1             | Lutra lutra LC050126 1                | 0,18791342 |
| Ursus arctos AP012576 6                | Leopardus colocolo NC028314 1         | 0,18791386 |
| Zalophus wolfebaeki SRR4431565 1       | Ursus javanicus/auropunctata NC006835 | 0,18791395 |
| Paradoxurus jerdoni MH464793 1         | Tapirus terrestris T358               | 0,18791594 |
| Lontra canadensis SRR10409165 1        | Ursus semitorquatus MH464789 1        | 0,18791817 |
| Ursus americanus JX193636 3            | Profelis aurata NC028299 1            | 0,18791845 |
| Panthera tigris amoyensis NC014770 2   | Gulo gulo NC009685 3                  | 0,18791943 |
| Mustela eversmannii NC028013 1         | Ursus brachyura KY117547 1            | 0,18791969 |
| Lontra canadensis SRR10409165 1        | Arctocepalus forsteri KT693377 17     | 0,18791993 |
| Caracal caracal NC028306 1             | Tapirus terrestris T358               | 0,18791997 |

|                                        |                                       |            |
|----------------------------------------|---------------------------------------|------------|
| Mellivora capensis T370 1              | lctonyx striatus T299 1               | 0,16792683 |
| Phoca fasciata NC008428 1              | Arctonyx collaris NC020645 1          | 0,16792853 |
| Pusa hispida NC 008433 1               | Melogale moschata KP726273 1          | 0,16793238 |
| Pusa hispida NC 008433 1               | Martes zibellina NC011579 39          | 0,16793349 |
| Leopardus wiedii NC028318 1            | Erignathus barbatus NC008426 1        | 0,16793604 |
| Melogale moschata NC020644 1           | Hydrurga leptonyx NC008425 1          | 0,16793698 |
| Ursus thibetanus laniger MH281753 2    | Cystophora cristata NC008427 1        | 0,16794387 |
| Pusa hispida NC 008433 1               | Homotherium latidens MF871702 3       | 0,16794889 |
| Proteles cristata T393 6               | Arctictis binturong T605 2            | 0,16796114 |
| Halichoerus grypus NC001602 2          | Arctonyx collaris NC020645 1          | 0,16796632 |
| Melogale moschata KP726273 1           | Cystophora cristata NC008427 1        | 0,16798727 |
| Mustela itatsi NC034330 19             | Cystophora cristata NC008427 1        | 0,16798903 |
| Procyon lotor AB462049 4               | Mustela frenata NC020640 1            | 0,16799118 |
| Procyon lotor AB462049 4               | Nasua nasua NC020647 1                | 0,16799271 |
| Phoca fasciata NC008428 1              | Meles meles T303 3                    | 0,16799541 |
| Galidictis fasciata DM333 1            | Cynogale bennetti KY117544 1          | 0,16799982 |
| Leopardus pardalis NC028315 1          | Cystophora cristata NC008427 1        | 0,16800427 |
| Proteles cristata T393 6               | Chrotogale owstoni T607 1             | 0,16800976 |
| Prionailurus planiceps NC028312 6      | Lobodon carcinophaga NC008423 1       | 0,16801049 |
| Prionailurus planiceps KY682741 4      | Hydrurga leptonyx NC008425 1          | 0,16801062 |
| Ursus thibetanus thibetanus NC011118 4 | Pusa caspica NC008431 1               | 0,16801345 |
| Ursus thibetanus mupinensis NC008753 2 | Pusa hispida NC 008433 1              | 0,16801414 |
| Ursus maritimus NC003428 31            | Hydrurga leptonyx NC008425 1          | 0,16801704 |
| Leopardus colocolo NC028314 1          | Erignathus barbatus NC008426 1        | 0,16802083 |
| Ursus americanus JX196366 3            | Cystophora cristata NC008427 1        | 0,16802561 |
| Lobodon carcinophaga NC008423 1        | Canis aureus KT448274 1               | 0,16802797 |
| Lutra lutra NC011358 9                 | Halichoerus grypus NC001602 2         | 0,16803437 |
| Ursus spelaeus EU327344 13             | Monachus monachus NC044972 5          | 0,16804094 |
| Ursus spelaeus NC011112 8              | Monachus monachus NC044972 5          | 0,16804954 |
| Martes americana NC020642 1            | Cystophora cristata NC008427 1        | 0,16805486 |
| Mustela kathiah NC023210 1             | Mirounga leonina NC008422 1           | 0,16805491 |
| Procyon lotor AB462049 4               | Enhydra lutris NC009692 1             | 0,16805649 |
| Potos flavus T414 1                    | Melogale moschata NC020644 1          | 0,16805917 |
| Phoca vitulina NC001325 1              | Martes melampus NC009678 1            | 0,16806644 |
| Phoca vitulina NC001325 1              | Martes americana NC020642 1           | 0,16806807 |
| Ursus arctos isabellinus 1885 2        | Cystophora cristata NC008427 1        | 0,16806847 |
| Ursus arctos EU497665 29               | Leptonyx chotes weddellii NC008424 1  | 0,16806938 |
| Phoca largha NC008430 1                | Bassariscus sumichrasti SRX1099089 1  | 0,16807109 |
| Viverricula indica NC025296 2          | Phoca fasciata NC008428 1             | 0,16807359 |
| Parahyaena brunnea NC038159 15         | Paradoxurus hermaphroditus NC039591 1 | 0,16807827 |
| Hydrurga leptonyx NC008425 1           | Felis catus NC001700 2                | 0,16807859 |
| Ursus thibetanus laniger MH281753 2    | Phoca largha NC008430 1               | 0,16808914 |
| Ommatophoca rossii AY377287etc 1       | Arctodus simus NC011116 1             | 0,16810727 |
| Phoca vitulina NC001325 1              | Gulo gulo NC009685 3                  | 0,16810797 |
| Mirounga leonina NC008422 1            | Meles anakuma NC009677 1              | 0,16811793 |
| Melogale moschata V0735A 1             | Leptonyx chotes weddellii NC008424 1  | 0,16812068 |
| Procyon lotor AB462049 4               | Lutra lutra LC050126 1                | 0,16812406 |
| Mungotictis decemlineata NC027828 1    | Cynogale bennetti KY117544 1          | 0,16813281 |
| Melogale moschata V0735A 1             | Lobodon carcinophaga NC008423 1       | 0,16813561 |
| Procyon lotor AB462049 4               | Mustela nivalis T306 5                | 0,16813575 |
| Viverricula indica NC025296 2          | Mirounga leonina NC008422 1           | 0,16813888 |
| Phoca vitulina NC001325 1              | Bassariscus sumichrasti SRX1099089 1  | 0,16813929 |
| Viverricula indica KX891751 1          | Lobodon carcinophaga NC008423 1       | 0,16814218 |
| Hydrurga leptonyx NC008425 1           | Aonyx cinerea NC035814 2              | 0,16814493 |
| Ursus thibetanus laniger MH281753 2    | Pusa sibirica NC008432 2              | 0,16814511 |
| Ursus thibetanus formosanus NC009331 1 | Pusa caspica NC008431 1               | 0,16814543 |
| Lobodon carcinophaga NC008423 1        | Leopardus wiedii NC028318 1           | 0,16814715 |
| Ursus arctos EU497665 29               | Lobodon carcinophaga NC008423 1       | 0,16815138 |
| Lobodon carcinophaga NC008423 1        | Acinonyx jubatus NC005212 3           | 0,16816051 |
| Pusa sibirica NC008432 2               | Gulo gulo NC009685 3                  | 0,16816321 |
| Tremarctos ornatus NC009969 2          | Pusa caspica NC008431 1               | 0,16818711 |
| Pusa caspica NC008431 1                | Enhydra lutris NC009692 1             | 0,16818798 |
| Pusa caspica NC008431 1                | Martes americana NC020642 1           | 0,16818979 |
| Procyon lotor AB462049 4               | Lutra lutra LC050126 1                | 0,16819122 |
| Procyon lotor AB462049 4               | Melogale moschata NC020644 1          | 0,16820021 |
| Pusa hispida NC 008433 1               | Mustela nigripes NC024942 1           | 0,16820055 |
| Leptonyx chotes weddellii NC008424 1   | Genetta servalina NC024568 2          | 0,16820289 |
| Prionailurus bengalensis NC028301 12   | Cystophora cristata NC008427 1        | 0,16820544 |
| Ursus maritimus NC003428 31            | Phoca fasciata NC008428 1             | 0,16820991 |
| Pusa hispida NC 008433 1               | lctonyx striatus T299 1               | 0,16821387 |
| Ursus thibetanus formosanus NC009331 1 | Pusa hispida NC 008433 1              | 0,16822584 |
| Monachus monachus NC044972 5           | Ailurus fulgens NC011124 1            | 0,16822655 |
| Ursus thibetanus thibetanus NC011118 4 | Phoca vitulina NC001325 1             | 0,16822708 |
| Lobodon carcinophaga NC008423 1        | Helarctos malayanus NC009968 2        | 0,16823104 |
| Pusa sibirica NC008432 2               | Lutra lutra NC011358 9                | 0,16823585 |
| Tremarctos ornatus NC009969 2          | Cystophora cristata NC008427 1        | 0,168255   |
| Pusa caspica NC008431 1                | Meles anakuma NC009677 1              | 0,16825555 |
| Pusa caspica NC008431 1                | Mustela sibirica AP017394 11          | 0,16825789 |
| Martes pennanti NC020664 16            | Leptonyx chotes weddellii NC008424 1  | 0,16825964 |
| Leptonyx chotes weddellii NC008424 1   | Ailurus fulgens NC011124 1            | 0,16826087 |
| Monachus schauinslandi NC008421 1      | Lutra lutra NC011358 9                | 0,16826101 |
| Potos flavus T414 1                    | Nasua nasua NC020647 1                | 0,16826257 |
| Phoca fasciata NC008428 1              | Martes martes T302 3                  | 0,16826932 |
| Ursus thibetanus mupinensis NC008753 2 | Pusa caspica NC008431 1               | 0,16827019 |
| Ursus thibetanus mupinensis NC008753 2 | Pusa sibirica NC008432 2              | 0,16827025 |
| Ursus thibetanus formosanus NC009331 1 | Pusa sibirica NC008432 2              | 0,16827996 |
| Ursus arctos isabellinus 1885 2        | Monachus schauinslandi NC008421 1     | 0,16828582 |
| Viverricula indica KX891745 1          | Monachus monachus NC044972 5          | 0,16829915 |
| Ursus americanus JX196366 3            | Erignathus barbatus NC008426 1        | 0,16830289 |
| Spilogale putorius NC010497 1          | Hydrurga leptonyx NC008425 1          | 0,16831166 |
| Mellivora capensis T370 1              | Meles meles T303 3                    | 0,16831555 |
| Ursus americanus JX196366 3            | Hydrurga leptonyx NC008425 1          | 0,16831842 |
| Halichoerus grypus NC001602 2          | Gulo gulo NC009685 3                  | 0,16832128 |
| Procyon lotor AB462049 4               | Enhydra lutris NC009692 1             | 0,16832556 |
| Procyon lotor AB462049 4               | Meles meles T303 3                    | 0,16832559 |
| Phoca groenlandica NC008429 54         | Meles leucurus NC039173 4             | 0,16833189 |
| Potos flavus T414 1                    | Aonyx cinerea NC035814 2              | 0,16833313 |
| Neovison vison NC020641 3              | Erignathus barbatus NC008426 1        | 0,16833434 |
| Pusa hispida NC 008433 1               | Mustela kathiah NC023210 1            | 0,16833445 |
| Tremarctos ornatus NC009969 2          | Phoca vitulina NC001325 1             | 0,1683346  |
| Tremarctos ornatus NC009969 2          | Mirounga angustirostris SRR10331586 1 | 0,1683348  |
| Martes foina NC020643 1                | Erignathus barbatus NC008426 1        | 0,16833642 |
| Lobodon carcinophaga NC008423 1        | Crossarchus platycephalus C7R66 1     | 0,16833663 |

|                                       |                                      |            |
|---------------------------------------|--------------------------------------|------------|
| Mustela kathiah NC023210 1            | Bdeogale nigripes GLC15 1            | 0,1879207  |
| Spilogale putorius NC010497 1         | Ailuropoda melanoleuca NC009492 5    | 0,18792121 |
| Vulpes zerda KJ603240 1               | Martes americana NC020642 1          | 0,18792148 |
| Tremarctos ornatus NC009969 2         | Salanoia concolor D378 1             | 0,18792179 |
| Urva brachyura KY117547 1             | Canis latrans NC008093 7             | 0,18792322 |
| Salanoia concolor D378 1              | Mustela eversmannii NC028013 1       | 0,18792328 |
| Prionodon linsang ERR2391707 1        | Mustela itatsi NC034330 19           | 0,18792394 |
| Procyon lotor AB462049 4              | Xenogale naso C07XAR110 1            | 0,18792449 |
| Vulpes zerda KJ603240 1               | Mungotictis decemlineata NC027828 1  | 0,1879247  |
| Mustela kathiah NC023210 1            | Mungotictis decemlineata NC027828 1  | 0,18792619 |
| Vulpes vulpes NC008434 5              | Martes pennanti NC020664 16          | 0,18793024 |
| Lycalon pictus NC028427 2             | Helogale parvula SRR7637809 1        | 0,18793333 |
| Vulpes corsac NC023958 1              | Prionodon pardicolor NC024569 2      | 0,18793331 |
| Felis nigripes NC028309 1             | Arctocepalus australis MGO23139 1    | 0,1879337  |
| Panthera pardus japonensis KJ866876   | Melogale moschata KP726273 1         | 0,18793374 |
| Puma yagouaroundi NC028311 1          | Arctocepalus gazella BK010918 1      | 0,18793474 |
| Panthera uncia KP202269 1             | Canis anthus NC027956 2              | 0,18793517 |
| Procyon lotor AB462049 4              | Diplogale hosei MH464790 1           | 0,18793534 |
| Parahyaena brunnea NC038159 15        | Meles meles T303 3                   | 0,18793547 |
| Panthera tigris amoyensis NC014770 2  | Ailurus fulgens styani NC009691 1    | 0,18793648 |
| Paradoxurus hermaphroditus NC03959    | Nyctereutes procyonoides NC013700 3  | 0,18793681 |
| Urocyon littoralis catalinae KP129018 | Prionailurus rubiginosus NC028304 2  | 0,18793707 |
| Ursus arctos GU573491 207             | Procyon lotor AB462049 4             | 0,18793787 |
| Ursus maritimus GU573488 Svalbard     | Procyon lotor AB462049 4             | 0,18793818 |
| Tremarctos ornatus NC009969 2         | Paradoxurus jerdoni MH464793 1       | 0,18793883 |
| Ommatophoca rossii AY377287etc 1      | Nasua nasua NC020647 1               | 0,18793987 |
| Lycalon linsang ERR2391707 1          | Lycalon pictus NC028427 2            | 0,18794023 |
| Otocyon megalotis SAF1 2              | Melogale moschata NC020644 1         | 0,18794182 |
| Panthera pardus japonensis KJ866876   | Arctodus simus NC011116 1            | 0,18794259 |
| Speothos venaticus C48 2              | Mustela altaica NC021751 1           | 0,18794294 |
| Otaria byronia OTAB 1                 | Felis nigripes NC028309 1            | 0,18794395 |
| Potos flavus T414 1                   | Panthera leo spelaea KX258452 2      | 0,18794504 |
| Ursus maritimus GU573488 Svalbard     | Lynx pardinus NC028319 161           | 0,18794569 |
| Ursus maritimus NC003428 31           | Lynx pardinus NC028319 161           | 0,18794569 |
| Ursus maritimus GU573488 Svalbard     | Prionailurus planiceps KY682741 4    | 0,18794644 |
| Ursus maritimus NC003428 31           | Leopardus jacobita NC028322 1        | 0,18794644 |
| Ursus arctos EU497665 29              | Prionailurus planiceps KY682741 4    | 0,18794657 |
| Prionailurus viverrinus NC028305 1    | Mephitis mephitis NC020648 1         | 0,18795167 |
| Panthera onca NC022842 1              | Martes martes T302 3                 | 0,18795477 |
| Martes americana NC020642 1           | Urva javanica/auropunctata NC006835  | 0,18795502 |
| Ursus thibetanus thibetanus NC011118  | Paradoxurus hermaphroditus NLNC 1    | 0,18795566 |
| Ursus thibetanus formosanus NC009331  | Pardofelis marmorata NLN3 2          | 0,18795569 |
| Suricata suricatta SSM10 1            | Canis aureus KT448274 1              | 0,18796162 |
| Ursus arctos AP012576 6               | Puma yagouaroundi NC028311 1         | 0,18796338 |
| Arctocepalus forsteri NC004023 28     | Ailuropoda melanoleuca NC009492 5    | 0,18796788 |
| Helarctos malayanus NC009968 2        | Galictis vittata T412 1              | 0,18796951 |
| Martes flavigula NC012141 3           | Eupleres goodotii D128 1             | 0,18797354 |
| Ursus maritimus GU573488 Svalbard     | Spilogale putorius NC010497 1        | 0,18797693 |
| Leptailurus serval NC028316 1         | Arctocepalus forsteri NC004023 28    | 0,18797776 |
| Prionodon linsang ERR2391707 1        | Lutra lutra LC050126 1               | 0,18797794 |
| Paradoxurus hermaphroditus NLNC 1     | Lutra lutra NC011358 9               | 0,18798082 |
| Canis mesomelas KT448280 1            | Atilax paludinosus T606 1            | 0,18798207 |
| Nasua nasua NC020647 1                | Conepatus chinga NC024596 1          | 0,18798403 |
| Mustela eversmannii NC028013 1        | Eupleres goodotii D128 1             | 0,1879857  |
| Lontra canadensis SRR10409165 1       | Xenogale naso C07XAR110 1            | 0,18798605 |
| Mustela sibirica NC020637 6           | Helogale parvula SRR7637809 1        | 0,18798643 |
| Bdeogale nigripes GLC15 1             | Arctocepalus townsendi NC008420 1    | 0,18798691 |
| Eupleres goodotii D128 1              | Bassariscus sumichrasti SRX1099089 1 | 0,18798712 |
| Vulpes corsac NC023958 1              | Martes melampus NC009678 1           | 0,18798722 |
| Vulpes corsac NC023958 1              | Cynictis penicillata T375 1          | 0,18798806 |
| Prionodon linsang ERR2391707 1        | Melogale moschata KP726273 1         | 0,18798843 |
| Melogale moschata NC020644 1          | Diplogale hosei MH464790 1           | 0,18798907 |
| Melogale moschata V0735A 1            | Canis latrans NC008093 7             | 0,18798949 |
| Urocyon littoralis catalinae KP129018 | Nandinia binotata NC024567 1         | 0,18798959 |
| Nyctereutes procyonoides NC013700 3   | Xenogale naso C07XAR110 1            | 0,18799001 |
| Suricata suricatta SSM10 1            | Nyctereutes procyonoides NC013700 3  | 0,1879901  |
| Nyctereutes procyonoides NC013700 3   | Ichneumia albicauda T603 1           | 0,1879905  |
| lctonyx striatus T299 1               | Canis lupus chanco NC010340 4        | 0,18799111 |
| Salanoia concolor D378 1              | Phocarcus hookeri NC008418 1         | 0,1879912  |
| Galidictis fasciata DM333 1           | Bassariscus sumichrasti SRX1099089 1 | 0,1879915  |
| Vulpes vulpes NC008434 5              | Galidictis fasciata DM333 1          | 0,18799253 |
| Mustela itatsi NC034330 19            | Galidia elegans D146 1               | 0,18799289 |
| Paradoxurus jerdoni MH464793 1        | Martes americana NC020642 1          | 0,18799582 |
| Panthera pardus japonensis KJ866876   | Ailurus fulgens NC011124 1           | 0,18799601 |
| Lutrogale perspicillata NC035811 1    | Leopardus guigna NC028321 1          | 0,18799776 |
| Ursus arctos isabellinus 1885 2       | Lutra lutra NC011358 9               | 0,18799834 |
| Ursus arctos GU573491 207             | Lutra lutra NC011358 9               | 0,18799867 |
| Otocyon megalotis SAF1 2              | Melogale moschata V0735A 1           | 0,18799891 |
| Martes melampus NC009678 1            | Hyena hyaena NC020669 1              | 0,18799914 |
| Ursus arctos GU573491 207             | Lutrogale perspicillata NC035811 1   | 0,18799983 |
| Otocyon megalotis SAF1 2              | Mustela putorius NC020638 4          | 0,18800072 |
| Profelis aurata NC028299 1            | Arctocepalus australis MGO23139 1    | 0,18800128 |
| Ichneumia albicauda T603 1            | Arctocepalus gazella BK010918 1      | 0,18800165 |
| Vulpes zerda KJ603240 1               | Mustela nivalis T306 5               | 0,18800181 |
| Martes zibellina NC011579 39          | Lycalopex sechurae KT448284 1        | 0,18800192 |
| Melogale moschata KP726273 1          | Lycalopex sechurae KT448284 1        | 0,18800212 |
| Ursus maritimus NC003428 31           | Procyon lotor AB462049 4             | 0,18800528 |
| Ursus arctos GU573488 5               | Lutra lutra NC011358 9               | 0,18800545 |
| Procyon lotor AB462049 4              | Panthera onca KP202264 2             | 0,18800624 |
| Martes americana NC020642 1           | Canis mesomelas KT448280 1           | 0,1880075  |
| Martes pennanti NC020664 16           | Hyena hyaena NC020669 1              | 0,1880092  |
| Panthera leo spelaea KX258452 2       | Mustela nigripes NC024942 1          | 0,18801065 |
| Ursus arctos isabellinus 1885 2       | Leopardus jacobita NC028322 1        | 0,18801321 |
| Ursus thibetanus thibetanus NC011118  | Cynictis penicillata T375 1          | 0,18801396 |
| Tremarctos ornatus NC009969 2         | Mephitis mephitis NC020648 1         | 0,18801644 |
| Eupleres goodotii D128 1              | Canis lupus familiaris NC002008 1231 | 0,18801913 |
| Ursus arctos GU573488 5               | Lynx pardinus NC028319 161           | 0,18801923 |
| Panthera tigris NC010642 35           | Otocyon megalotis SAF1 2             | 0,18801962 |
| Ursus spelaeus EU327344 13            | Felis nigripes NC028309 1            | 0,18802209 |
| Hemigalpus derbyanus MH464791 1       | Arctocepalus townsendi NC008420 1    | 0,1880229  |
| Galictis vittata T412 1               | Felis nigripes NC028309 1            | 0,18802448 |
| Leopardus geoffroyi NC028320 1        | Ailuropoda melanoleuca NC009492 5    | 0,1880267  |
| Melogale moschata NC020644 1          | Urva javanica/auropunctata NC006835  | 0,18803059 |

|                                        |                                       |            |
|----------------------------------------|---------------------------------------|------------|
| Leptonychotes weddellii NC008424 1     | Catopuma badia NC028300 1             | 0,16833681 |
| Prionailurus planiceps NC028312 6      | Leptonychotes weddellii NC008424 1    | 0,168337   |
| Pusa hispida NC 008433 1               | Martes americana NC020642 1           | 0,16833711 |
| Melogale moschata V0735A 1             | Hydrurga leptonyx NC008425 1          | 0,16833736 |
| Leptonychotes weddellii NC008424 1     | Leopardus guigna NC028321 1           | 0,16833988 |
| Pusa hispida NC 008433 1               | Aonyx cinerea NC035814 2              | 0,16834392 |
| Procyon lotor AB462049 4               | Martes foina NC020643 1               | 0,1683443  |
| Procyon lotor AB462046 3               | Martes foina NC020643 1               | 0,16834454 |
| Pusa caspica NC008431 1                | Helarctos malayanus NC009968 2        | 0,16834795 |
| Ursus thibetanus laniger MH281753 2    | Erigonathus barbatus NC008426 1       | 0,16834861 |
| Ursus thibetanus formosanus NC009331 1 | Erigonathus barbatus NC008426 1       | 0,16834868 |
| Ursus arctos AP012576 6                | Leptonychotes weddellii NC008424 1    | 0,168354   |
| Ursus arctos GU573486 5                | Phoca largha NC008430 1               | 0,16835496 |
| Monachus monachus NC044972 5           | Meles meles T303 3                    | 0,16835515 |
| Proteles cristata T393 6               | Prionodon pardicor NC024569 2         | 0,16835682 |
| Ursus arctos GU573486 5                | Hydrurga leptonyx NC008425 1          | 0,168359   |
| Mustela nigripes NC024942 1            | Halichoerus grypus NC001602 2         | 0,16837311 |
| Hydrurga leptonyx NC008425 1           | Civettictis civetta NC033378 1        | 0,16838512 |
| Procyon lotor AB462046 3               | Mustela eversmanni NC028013 1         | 0,16839583 |
| Procyon lotor AB462046 3               | Martes americana NC020642 1           | 0,16839871 |
| Mustela altaica NC021751 1             | Ailuurus fulgens styani NC009691 1    | 0,16839932 |
| Salanoia concolor D378 1               | Cynogale bennetti KY117544 1          | 0,16840276 |
| Potos flavus T414 1                    | Phoca groenlandica NC008429 54        | 0,16840449 |
| Viverra zibetha T609 1                 | Leptonychotes weddellii NC008424 1    | 0,1684045  |
| Viverricula indica XK891745 1          | Phoca fasciata NC008428 1             | 0,16840617 |
| Leopardus pardalis T262 1              | Erigonathus barbatus NC008426 1       | 0,16840735 |
| Phoca largha NC008430 1                | Melogale moschata NC020644 1          | 0,16840985 |
| Ursus maritimus GU573488 Svalbard      | Phoca fasciata NC008428 1             | 0,16841197 |
| Ursus thibetanus laniger MH281753 2    | Pusa caspica NC008431 1               | 0,16841449 |
| Proteles cristata T393 6               | Paradoxurus hermaphroditus NLNC 1     | 0,1684161  |
| Ursus thibetanus mupinensis NC008753 2 | Phoca largha NC008430 1               | 0,16841626 |
| Ursus thibetanus thibetanus NC011118 4 | Mirounga angustirostris SRR10331586 1 | 0,16841914 |
| Ursus arctos isabellinus 18B5 2        | Lobodon carcinophaga NC008423 1       | 0,16842014 |
| Mustela frenata NC020640 1             | Monachus monachus NC044972 5          | 0,16842306 |
| Ursus thibetanus formosanus NC009331 1 | Phoca largha NC008430 1               | 0,16842631 |
| Ursus spelaeus EU327344 13             | Phoca largha NC008430 1               | 0,16842894 |
| Viverricula indica XK891751 1          | Monachus monachus NC044972 5          | 0,16843335 |
| Parahaena brunnea NC038159 15          | Diplogale hosei MH464790 1            | 0,16843526 |
| Tremarctos ornatus NC009969 2          | Mirounga leonina NC008422 1           | 0,16845655 |
| Hydrurga leptonyx NC008425 1           | Chrotogale owstoni T607 1             | 0,16845845 |
| Meles anakuma NC009677 1               | Ailuurus fulgens styani NC009691 1    | 0,16846111 |
| Mirounga leonina NC008422 1            | Ailuurus fulgens styani NC009691 1    | 0,16846411 |
| Procyon lotor AB462046 3               | Melogale moschata NC020644 1          | 0,16846949 |
| Viverricula indica XK891745 1          | Erigonathus barbatus NC008426 1       | 0,16847414 |
| Prionodon linsang ERR2391707 1         | Parahaena brunnea NC038159 15         | 0,16847357 |
| Phoca fasciata NC008428 1              | Bassariscus sumichrasti SRX1099089 1  | 0,16847581 |
| Potos flavus T414 1                    | Phoca vitulina NC001325 1             | 0,16847694 |
| Monachus schauinslandi NC008421 1      | Bassariscus sumichrasti SRX1099089 1  | 0,16847996 |
| Lobodon carcinophaga NC008423 1        | Catopuma badia NC028300 1             | 0,16848205 |
| Poecilogale albinucha T602 1           | Hydrurga leptonyx NC008425 1          | 0,16848353 |
| Ursus thibetanus laniger MH281753 2    | Mirounga leonina NC008422 1           | 0,16848452 |
| Ursus spelaeus NC011112 8              | Mirounga leonina NC008422 1           | 0,16848627 |
| Paradoxurus hermaphroditus NC039591 1  | Crocota crocata NC020670 3            | 0,16849008 |
| Ursus spelaeus NC011112 8              | Phoca groenlandica NC008429 54        | 0,16849225 |
| Ursus americanus JX196366 3            | Leptonychotes weddellii NC008424 1    | 0,16850454 |
| Ursus americanus JX196366 3            | Lobodon carcinophaga NC008423 1       | 0,16852072 |
| Pusa sibirica NC008432 2               | Enhydra lutris NC009692 1             | 0,16852489 |
| Mustela kathiah NC023210 1             | Erigonathus barbatus NC008426 1       | 0,16852614 |
| Mustela putorius NC020638 4            | Cystophora cristata NC008427 1        | 0,16852726 |
| Pusa caspica NC008431 1                | Mustela sibirica NC020637 6           | 0,16852731 |
| Phoca groenlandica NC008429 54         | Lutra lutra LC050126 1                | 0,16852956 |
| Melogale moschata NC020644 1           | Erigonathus barbatus NC008426 1       | 0,16853014 |
| Phoca largha NC008430 1                | Meles leucurus NC039173 4             | 0,16853637 |
| Tremarctos ornatus NC009969 2          | Phoca largha NC008430 1               | 0,16853701 |
| Procyon lotor AB462046 3               | Poecilogale albinucha T602 1          | 0,1685371  |
| Pusa hispida NC 008433 1               | Mustela putorius NC020638 4           | 0,1685371  |
| Procyon lotor AB462046 3               | Lobodon carcinophaga NC008423 1       | 0,16854385 |
| Pusa hispida NC 008433 1               | Neovison vison NC020641 3             | 0,16854478 |
| Lobodon carcinophaga NC008423 1        | Leopardus tigrinus NC028317 1         | 0,16855067 |
| Ursus spelaeus EU327344 13             | Mirounga leonina NC008422 1           | 0,16855314 |
| Ursus thibetanus thibetanus NC011118 4 | Mirounga leonina NC008422 1           | 0,16855371 |
| Ursus thibetanus mupinensis NC008753 2 | Mirounga angustirostris SRR10331586 1 | 0,16855574 |
| Tremarctos ornatus NC009969 2          | Halichoerus grypus NC001602 2         | 0,16857743 |
| Melogale moschata KP726273 1           | Erigonathus barbatus NC008426 1       | 0,16859256 |
| Pusa sibirica NC008432 2               | Martes zibellina NC011579 39          | 0,16859402 |
| Mustela eversmanni NC028013 1          | Cystophora cristata NC008427 1        | 0,16859426 |
| Pusa caspica NC008431 1                | Mustela nigripes NC024942 1           | 0,16859502 |
| Procyon lotor AB462046 3               | Mustela sibirica AP017394 11          | 0,16859771 |
| Procyon lotor AB462046 3               | Nasua nasua NC020647 1                | 0,16859832 |
| Pusa hispida NC 008433 1               | Meles anakuma NC009677 1              | 0,16860009 |
| Pusa hispida NC 008433 1               | Mustela sibirica AP017394 11          | 0,16860449 |
| Phoca fasciata NC008428 1              | Fossa fossana D350 1                  | 0,16860579 |
| Mungos mungo/gambianus SRR7704821 1    | Hydrurga leptonyx NC008425 1          | 0,16860686 |
| Neovison vison NC020641 3              | Ailuurus fulgens styani NC009691 1    | 0,16860873 |
| Procyon lotor AB462046 3               | Hydrurga leptonyx NC008425 1          | 0,16861105 |
| Puma yagouaroundi NC028311 1           | Lobodon carcinophaga NC008423 1       | 0,16861658 |
| Profelis aurata NC028299 1             | Hydrurga leptonyx NC008425 1          | 0,16861689 |
| Ursus thibetanus mupinensis NC008753 2 | Phoca vitulina NC001325 1             | 0,16861865 |
| Ursus thibetanus formosanus NC009331 1 | Mirounga leonina NC008422 1           | 0,16861871 |
| Ursus maritimus GU573488 Svalbard      | Hydrurga leptonyx NC008425 1          | 0,16862312 |
| Pusa sibirica NC008432 2               | Homotherium latidens MF871702 3       | 0,16862553 |
| Ursus spelaeus EU327344 13             | Phoca groenlandica NC008429 54        | 0,16862714 |
| Hemigalus derbyanus MH464791 1         | Erigonathus barbatus NC008426 1       | 0,1686302  |
| Ursus thibetanus formosanus NC009331 1 | Mirounga angustirostris SRR10331586 1 | 0,1686321  |
| Neovison vison NC020641 3              | Monachus monachus NC044972 5          | 0,16863564 |
| Meles anakuma NC009677 1               | Erigonathus barbatus NC008426 1       | 0,16863763 |
| Procyon lotor AB462049 4               | Mustela eversmanni NC028013 1         | 0,16864698 |
| Monachus schauinslandi NC008421 1      | Enhydra lutris NC009692 1             | 0,1686659  |
| Phoca fasciata NC008428 1              | Meles leucurus NC039173 4             | 0,16866811 |
| Phoca vitulina NC001325 1              | Melogale moschata KP726273 1          | 0,1686732  |
| Ursus arctos EU497665 29               | Cystophora cristata NC008427 1        | 0,16867462 |
| Ursus arctos GU573491 207              | Erigonathus barbatus NC008426 1       | 0,16867493 |
| Prionailurus bengalensis NC028301 12   | Erigonathus barbatus NC008426 1       | 0,16867545 |

|                                        |                                      |            |
|----------------------------------------|--------------------------------------|------------|
| Eumetopias jubatus NC004030 10         | Diplogale hosei MH464790 1           | 0,18803133 |
| Panthera leo NERO 19                   | Canis anthus NC027956 2              | 0,188033   |
| Ursus arctos AP012576 6                | Leopardus geoffroyi NC028320 1       | 0,18803413 |
| Ursus spelaeus EU327344 13             | Lycalopex sechurae KT448284 1        | 0,18803523 |
| Ursus arctos isabellinus 18B5 2        | Canis lupus familiaris NC002008 1231 | 0,18804061 |
| Catopuma temminckii NC027115 41        | Arctocepalus forsteri NC004023 28    | 0,18804176 |
| Felis silvestris lybica KP202275 4     | Arctocepalus forsteri NC004023 28    | 0,18804274 |
| Mungos mungo/gambianus SRR7704821 1    | Canis mesomelas KT448280 1           | 0,18804342 |
| Ichneumia albicauda T603 1             | Arctocepalus forsteri NC004023 28    | 0,18804379 |
| Parahaena brunnea NC038159 15          | Gulo gulo NC009685 3                 | 0,18804657 |
| Lycalopex sechurae KT448284 1          | Urra javanica T413 1                 | 0,18804818 |
| Paradoxurus hermaphroditus NLNC 1      | Tapirus terrestris T358              | 0,18804881 |
| Lutrogale perspicillata NC035811 1     | Civettictis civetta NC033378 1       | 0,1880495  |
| Panthera pardus NC010641 5             | Arctodus simus NC011116 1            | 0,18804967 |
| Lutra lutra LC050126 1                 | Canis anthus NC027956 2              | 0,18805134 |
| Panthera pardus NC010641 5             | Mustela nivalls T306 5               | 0,18805152 |
| Meles anakuma NC009677 1               | Cynictis penicillata T375 1          | 0,18805292 |
| Meles anakuma NC009677 1               | Bdeogale nigripes GLC15 1            | 0,18805304 |
| Viverra zibetha T609 1                 | Tapirus terrestris T358              | 0,18805304 |
| Vulpes zerda KJ603240 1                | Hemigalus derbyanus MH464791 1       | 0,18805519 |
| Vulpes corsac NC023958 1               | Melogale moschata V0735A 1           | 0,18805523 |
| Vulpes lagopus NC026529 3              | Urra semitorquata MH464789 1         | 0,18805654 |
| Nyctereutes procyonoides NC013700 3    | Cynictis penicillata T375 1          | 0,18805833 |
| Galidia elegans D146 1                 | Bassariscus sumichrasti SRX1099089 1 | 0,18805841 |
| Vulpes lagopus NC026529 3              | Mustela erminea T305 2               | 0,18806104 |
| Galidictis fasciata DM333 1            | Arctocepalus australis MGO23139 1    | 0,18806113 |
| Vulpes vulpes NC008434 5               | Bassariscus sumichrasti SRX1099089 1 | 0,18806134 |
| Mungotictis decemlineata NC027828      | Arctocepalus gazella BK010918 1      | 0,18806142 |
| Profelis aurata NC028299 1             | Conepatus chinga NC042596 1          | 0,18806238 |
| Mephitis mephitis NC020648 1           | Eumetopias jubatus NC004030 10       | 0,18806341 |
| Otaria byronia OTAB 1                  | Cynictis penicillata T375 1          | 0,18806383 |
| Vulpes corsac NC023958 1               | Melogale moschata NC020644 1         | 0,18806468 |
| Vulpes lagopus NC026529 3              | Paradoxurus hermaphroditus NLNC 1    | 0,18806477 |
| Poecilogale albinucha T602 1           | Urra semitorquata MH464789 1         | 0,18806639 |
| Cryptoprocta ferox FC13 1              | Arctonyx collaris NC020645 1         | 0,18806665 |
| Otocyon megalotis SAF 1 2              | Martes zibellina NC011579 39         | 0,18806669 |
| Ursus arctos GU573491 207              | Crossarchus platycephalus C7R66 1    | 0,18806775 |
| Lycyon pictus NC028427 2               | Xenogale naso C07XAR110 1            | 0,18806823 |
| Suricata suricatta SSM10 1             | Lycyon pictus NC028427 2             | 0,18806864 |
| Galerella sanguinea T378 1             | Ailuurus fulgens styani NC009691 1   | 0,18806891 |
| Felis chaus NC028307 1                 | Arctocepalus gazella BK010918 1      | 0,18806973 |
| Urocyon cinereogargenteus NC026723 2   | Lynx canadensis NC028313 1           | 0,18807058 |
| Urocyon littoralis catalinae KP129018  | Leopardus wiedii NC028318 1          | 0,18807104 |
| Ursus maritimus NC003428 31            | Salanoia concolor D378 1             | 0,18807107 |
| Prionodon pardicor NC024569 2          | Nyctereutes procyonoides NC013700 3  | 0,1880715  |
| Paguma larvata PDD511 2                | Martes martes T302 3                 | 0,18807192 |
| Tremarctos ornatus NC009969 2          | Lycyon pictus NC028427 2             | 0,18807207 |
| Meles leucurus NC039173 4              | Chrysocyon brachyurus NC024172 1     | 0,18807563 |
| Panthera tigris NC010642 35            | Martes zibellina NC011579 39         | 0,18807879 |
| Ursus thibetanus laniger MH281753 2    | Helogale parvula SRR7637809 1        | 0,18807915 |
| Ursus arctos EU497665 29               | Panthera pardus japonensis KJ866876  | 0,18807986 |
| Ursus thibetanus mupinensis NC008753 2 | Panthera onca KP202264 2             | 0,18808015 |
| Proteles cristata T393 6               | Martes martes T302 3                 | 0,18808079 |
| Ursus arctos GU573491 207              | Leopardus jacobita NC028322 1        | 0,18808107 |
| Ursus arctos EU497665 29               | Leopardus jacobita NC028322 1        | 0,18808109 |
| Ursus maritimus GU573488 Svalbard      | Leopardus jacobita NC028322 1        | 0,1880811  |
| Ursus thibetanus thibetanus NC011118 4 | Helogale parvula SRR7637809 1        | 0,18808152 |
| Melursus ursinus NC009970 2            | Lontra canadensis SRR10409165 1      | 0,18808156 |
| Ursus arctos EU497665 29               | Prionailurus bengalensis NC028301 12 | 0,18808234 |
| Ursus arctos EU497665 29               | Leptailurus serval NC028316 1        | 0,18808253 |
| Ursus arctos isabellinus 18B5 2        | Leopardus guigna NC028321 1          | 0,18808499 |
| Parahaena brunnea NC038159 15          | Ictonyx striatus T299 1              | 0,18808641 |
| Helarctos malayanus NC009968 2         | Cryptoprocta ferox FC13 1            | 0,18808672 |
| Ursus spelaeus NC011112 8              | Procyon lotor AB462046 3             | 0,18808699 |
| Halichoerus grypus NC001602 2          | Cynogale bennetti KY117544 1         | 0,18808727 |
| Ursus arctos GU573486 5                | Puma concolor NC016470 22            | 0,18808803 |
| Zalophus californianus NC008416 1      | Xenogale naso C07XAR110 1            | 0,18808819 |
| Galidictis fasciata DM333 1            | Canis aureus KT448274 1              | 0,18808995 |
| Ursus arctos GU573486 5                | Prionailurus bengalensis CKM45 20    | 0,18809164 |
| Melursus ursinus NC009970 2            | Genetta genetta T297 1               | 0,18809222 |
| Galidictis fasciata DM333 1            | Canis lupus familiaris NC002008 1231 | 0,18809378 |
| Aonyx cinerea NC035814 2               | Acinonyx jubatus NC005212 3          | 0,18809427 |
| Panthera leo NERO 19                   | Lutra lutra NC011358 9               | 0,18809427 |
| Paradoxurus hermaphroditus NC039591 1  | Helarctos malayanus NC009968 2       | 0,18809481 |
| Vulpes zerda KJ603240 1                | Gulo gulo NC009685 3                 | 0,18810368 |
| Prionodon linsang ERR2391707 1         | Enhydra lutris NC009692 1            | 0,18811385 |
| Conepatus chinga NC042596 1            | Aonyx cinerea NC035814 2             | 0,18811579 |
| Panthera leo NERO 19                   | Neovison vison NC020641 3            | 0,18811581 |
| Ursus arctos prinosus MGO66703 3       | Spilogale putorius NC010497 1        | 0,18811817 |
| Vulpes vulpes NC008434 5               | Lutra lutra LC050126 1               | 0,18811974 |
| Melogale moschata V0735A 1             | Bdeogale nigripes GLC15 1            | 0,18812083 |
| Panthera pardus NC010641 5             | Neovison vison NC020641 3            | 0,18812105 |
| Vulpes vulpes NC008434 5               | Bdeogale nigripes GLC15 1            | 0,1881227  |
| Lontra canadensis SRR10409165 1        | Arctocepalus gazella BK010918 1      | 0,1881232  |
| Tremarctos ornatus NC009969 2          | Galidictis fasciata DM333 1          | 0,18812382 |
| Urocyon cinereogargenteus NC026723 2   | Martes melampus NC009678 1           | 0,18812406 |
| Attilax paludinosus T606 1             | Arctocepalus gazella BK010918 1      | 0,18812463 |
| Martes martes T302 3                   | Helogale parvula SRR7637809 1        | 0,18812609 |
| Bassariscus neblina SRX1097850 1       | Ailuurus fulgens styani NC011124 1   | 0,18812855 |
| Enhydra lutris NC009692 1              | Canis mesomelas KT448280 1           | 0,18812943 |
| Martes melampus NC009678 1             | Lycalopex sechurae KT448284 1        | 0,18812943 |
| Paguma larvata PDD511 2                | Martes americana NC020642 1          | 0,18813001 |
| Lontra canadensis SRR10409165 1        | Galerella sanguinea T378 1           | 0,18813039 |
| Galerella sanguinea T378 1             | Tapirus terrestris T358              | 0,18813108 |
| Ursus thibetanus thibetanus NC011118 4 | Panthera pardus NC010641 5           | 0,18813109 |
| Suricata suricatta SSM10 1             | Mustela nivalls T306 5               | 0,18813194 |
| Vulpes zerda KJ603240 1                | Arctodus simus NC011116 1            | 0,18813349 |
| Otocyon megalotis SAF 1 2              | Enhydra lutris NC009692 1            | 0,18813357 |
| Ursus arctos prinosus MGO66703 3       | Lutra lutra NC011358 9               | 0,18813376 |
| Neophoca cinerea NC008419 1            | Conepatus chinga NC042596 1          | 0,18813387 |
| Martes foina NC020643 1                | Helogale parvula SRR7637809 1        | 0,18813497 |
| Panthera uncia KP202269 1              | Melogale moschata KP726273 1         | 0,1881355  |
| Ictonyx striatus T299 1                | Helogale parvula SRR7637809 1        | 0,18813567 |

|                                         |                                       |            |
|-----------------------------------------|---------------------------------------|------------|
| Hydrurga leptonyx NC008425 1            | Felis chaus NC028307 1                | 0,16868474 |
| Phoca groenlandica NC008429 54          | Helarctos malayanus NC009968 2        | 0,16869371 |
| Ursus arctos GUS73491 207               | Monachus monachus NC044972 5          | 0,16871022 |
| Erigonathus barbatus NC008426 1         | Enhydra lutris NC009692 1             | 0,16872036 |
| Mirounga leonina NC008422 1             | Ailuurus fulgens NC011124 1           | 0,16873333 |
| Mungos mungo MNC7 1                     | Leptonychotes weddellii NC008424 1    | 0,16873366 |
| Monachus schauinslandi NC008421 1       | Meles meles T303 3                    | 0,1687362  |
| Phoca fasciata NC008428 1               | Martes zibellina NC011579 39          | 0,16873644 |
| Phoca groenlandica NC008429 54          | Arctonyx collaris NC020645 1          | 0,16873685 |
| Phoca largha NC008430 1                 | Mustela nigripes NC024942 1           | 0,16874149 |
| Phoca vitulina NC001325 1               | Mustela nigripes NC024942 1           | 0,16874157 |
| Homotherium latidens MF871702 3         | Cystophora cristata NC008427 1        | 0,16874234 |
| Leopardus pardalis NC028315 1           | Erigonathus barbatus NC008426 1       | 0,16874364 |
| Pusa hispida NC 008433 1                | Martes pennanti NC020664 16           | 0,16874628 |
| Prionailurus planiceps KY682741 4       | Lobodon carcinophaga NC008423 1       | 0,16875133 |
| Ursus arctos GU573486 5                 | Lobodon carcinophaga NC008423 1       | 0,16876353 |
| Meles leucurus NC039173 4               | Halichoerus grypus NC001602 2         | 0,16877417 |
| Monachus schauinslandi NC008421 1       | Martes melampus NC009678 1            | 0,16880196 |
| Mustela sibirica AP017394 11            | Monachus schauinslandi NC008421 1     | 0,16880624 |
| Helarctos malayanus NC009968 2          | Halichoerus grypus NC001602 2         | 0,16880789 |
| Phoca vitulina NC001325 1               | Martes zibellina NC011579 39          | 0,16880891 |
| Ursus arctos EU497665 29                | Phoca fasciata NC008428 1             | 0,16881615 |
| Lobodon carcinophaga NC008423 1         | Genetta servalina NC024568 2          | 0,16881764 |
| Hydrurga leptonyx NC008425 1            | Civettictis civetta GLC19 1           | 0,16881923 |
| Ursus maritimus NC003428 31             | Phoca largha NC008430 1               | 0,16882032 |
| Phoca largha NC008430 1                 | Helarctos malayanus NC009968 2        | 0,1688336  |
| Paradoxurus jerdoni MH464793 1          | Crocota crocata NC020670 3            | 0,16883609 |
| Pusa sibirica NC008432 2                | Martes flavigula NC012141 3           | 0,16884397 |
| Melogale moschata KP726273 1            | Halichoerus grypus NC001602 2         | 0,16884589 |
| Martes foina NC020643 1                 | Halichoerus grypus NC001602 2         | 0,16885939 |
| Pusa hispida NC008431 1                 | Lutra lutra NC011358 9                | 0,16885936 |
| Viverra taspalunga MH464792 1           | Mirounga leonina NC008422 1           | 0,16886312 |
| Pusa caspica NC008431 1                 | Martes zibellina NC011579 39          | 0,16886324 |
| Taxidea taxus NC020646 1                | Ailuurus fulgens NC011124 1           | 0,16886485 |
| Pusa caspica NC008431 1                 | Bassariscus sumichrasti SRX1099089 1  | 0,16886736 |
| Phoca fasciata NC008428 1               | Martes americana NC020642 1           | 0,16887088 |
| Mirounga leonina NC008422 1             | Hemigalus derbyanus MH464791 1        | 0,16887655 |
| Ursus arctos GUS73491 207               | Cystophora cristata NC008427 1        | 0,16887656 |
| Phoca groenlandica NC008429 54          | Martes foina NC020643 1               | 0,1688842  |
| Monachus schauinslandi NC008421 1       | Arctotherium sp NC030174 1            | 0,16888577 |
| Pusa sibirica NC008432 2                | Helarctos malayanus NC009968 2        | 0,16888662 |
| Ursus arctos AP012576 6                 | Cystophora cristata NC008427 1        | 0,16889179 |
| Ursus arctos EU497665 29                | Hydrurga leptonyx NC008425 1          | 0,16889249 |
| Ursus thibetanus laniger MH281753 2     | Phoca vitulina NC001325 1             | 0,16889755 |
| Ursus spelaeus NC011122 8               | Phoca largha NC008430 1               | 0,16890042 |
| Phoca vitulina NC001325 1               | Martes flavigula NC012141 3           | 0,16892362 |
| Hydrurga leptonyx NC008425 1            | Conepatus chinga NC042596 1           | 0,16893084 |
| Procyon lotor AB462049 4                | Mustela sibirica NC020637 6           | 0,16893412 |
| Bassariscus sumichrasti SRX1099089 1    | Aonyx cinerea NC035814 2              | 0,16893587 |
| Leptonychotes weddellii NC008424 1      | Diplogale hoesi MH464790 1            | 0,16893734 |
| Monachus schauinslandi NC008421 1       | Ailuurus fulgens NC011124 1           | 0,16894434 |
| Ursus arctos GU573486 5                 | Erigonathus barbatus NC008426 1       | 0,16895062 |
| Phoca vitulina NC001325 1               | Neovison vison NC020641 3             | 0,16895252 |
| Ursus arctos GUS73491 207               | Lobodon carcinophaga NC008423 1       | 0,16895884 |
| Ursus maritimus GUS73488 Svalbard       | Lobodon carcinophaga NC008423 1       | 0,1689591  |
| Pusa sibirica NC008432 2                | Leopardus colocolo NC028314 1         | 0,1689658  |
| Phoca vitulina NC001325 1               | Homotherium latidens MF871702 3       | 0,16897495 |
| Viverricula indica NC025296 2           | Monachus monachus NC044972 5          | 0,16897592 |
| Leptonychotes weddellii NC008424 1      | Conepatus chinga NC042596 1           | 0,1689907  |
| Pusa caspica NC008431 1                 | Melogale moschata KP726273 1          | 0,16899723 |
| Procyon lotor AB462049 4                | Meles meles T303 3                    | 0,16899878 |
| Nandinia binotata NC02567 1             | Mustela erminea T305 2                | 0,16899952 |
| Pusa sibirica NC008432 2                | Bassariscus sumichrasti SRX1099089 1  | 0,16900182 |
| Procyon lotor AB462049 4                | Melogale moschata KP726273 1          | 0,16900332 |
| Mustela nivalis T306 5                  | Erigonathus barbatus NC008426 1       | 0,16900697 |
| Pusa hispida NC 008433 1                | Mustela sibirica NC020637 6           | 0,16900845 |
| Leptonychotes weddellii NC008424 1      | Felis chaus NC028307 1                | 0,16901056 |
| Ursus arctos isabellinus 1885 2         | Erigonathus barbatus NC008426 1       | 0,1690114  |
| Viverricula indica KX891751 1           | Phoca fasciata NC008428 1             | 0,16901219 |
| Monachus schauinslandi NC008421 1       | Martes martes T302 3                  | 0,16901505 |
| Ursus arctos GUS73486 5                 | Pusa sibirica NC008432 2              | 0,16901696 |
| Ursus arctos GUS73486 5                 | Pusa hispida NC 008433 1              | 0,16903096 |
| Ursus thibetanus formosanus NC009331 1  | Phoca vitulina NC001325 1             | 0,16903271 |
| Prionodon pardolicor NC024569 2         | Crocota crocata NC020670 3            | 0,16903403 |
| Ursus americanus JX196366 3             | Ursus arctos NC008428 1               | 0,16904345 |
| Monachus monachus NC044972 5            | Bassariscus sumichrasti SRX1099089 1  | 0,16904439 |
| Pusa sibirica NC008432 2                | Melogale moschata KP726273 1          | 0,16904649 |
| Arctonyx collaris NC020645 1            | Ailuurus fulgens NC011124 1           | 0,16906951 |
| Pusa sibirica NC008432 2                | Potos flavus T414 1                   | 0,16907017 |
| Pusa caspica NC008431 1                 | Potos flavus T414 1                   | 0,16907021 |
| Pusa sibirica NC008432 2                | Aonyx cinerea NC035814 2              | 0,16907062 |
| Pusa caspica NC008431 1                 | Melogale moschata NC020644 1          | 0,16907087 |
| Pusa sibirica NC008432 2                | Melogale moschata NC020644 1          | 0,16907111 |
| Phoca fasciata NC008428 1               | Melogale moschata KP726273 1          | 0,16907284 |
| Prionailurus bengalensis NC028301 12    | Mirounga leonina NC008422 1           | 0,16907713 |
| Mustela nivalis T306 5                  | Ailuurus fulgens styani NC009691 1    | 0,16907763 |
| Viverricula indica KX891745 1           | Mirounga leonina NC008422 1           | 0,16907766 |
| Phoca largha NC008430 1                 | Mustela putorius NC020638 4           | 0,16907781 |
| Phoca vitulina NC001325 1               | Mustela putorius NC020638 4           | 0,16907793 |
| Phoca largha NC008430 1                 | Martes pennanti NC020664 16           | 0,16908342 |
| Phoca largha NC008430 1                 | Aonyx cinerea NC035814 2              | 0,16908413 |
| Ursus arctos pruinosus MG066703 3       | Cystophora cristata NC008427 1        | 0,16908492 |
| Hydrurga leptonyx NC008425 1            | Catopuma temminckii NC027115 41       | 0,16908763 |
| Pusa hispida NC 008433 1                | Catopuma badia NC028300 1             | 0,16908884 |
| Ursus arctos GUS73491 207               | Hydrurga leptonyx NC008425 1          | 0,16909422 |
| Viverricula indica NC025296 2           | Mirounga angustirostris SR110331586 1 | 0,16909714 |
| Monachus monachus NC044972 5            | Hemigalus derbyanus MH464791 1        | 0,16909773 |
| Mustela putorius NC020638 4             | Halichoerus grypus NC001602 2         | 0,16911164 |
| Martes americana NC020642 1             | Halichoerus grypus NC001602 2         | 0,16911611 |
| Ursus thibetanus mupiniensis NC008753 2 | Halichoerus grypus NC001602 2         | 0,16913164 |
| Ursus thibetanus formosanus NC009331 1  | Halichoerus grypus NC001602 2         | 0,16914167 |
| Mustela sibirica NC020637 6             | Monachus schauinslandi NC008421 1     | 0,16914287 |
| Pusa hispida NC 008433 1                | Melogale moschata V0735A 1            | 0,16914449 |

|                                       |                                      |            |
|---------------------------------------|--------------------------------------|------------|
| Felis nigripes NC028309 1             | Arctocepalus forsteri KT693377 17    | 0,18813579 |
| Viverricula indica KX891745 1         | Neophoca cinerea NC008419 1          | 0,18813583 |
| Vulpes ferrillata NC027935 1          | Prionailurus planiceps KY682741 4    | 0,18813686 |
| Vulpes lutreus NC026529 3             | Martes foina NC020643 1              | 0,18813792 |
| Mungotictis decemlineata NC027828     | Lycaon pictus NC028427 2             | 0,18813857 |
| Parahaena brunnea NC038159 15         | Mustela itatsi NC034330 19           | 0,18813883 |
| Speothos venaticus C48 2              | Mustela putorius NC020638 4          | 0,18813962 |
| Ursus arctos GUS73491 207             | Procyon lotor AB462046 3             | 0,18814018 |
| Ursus arctos isabellinus 1885 2       | Procyon lotor AB462049 4             | 0,18814018 |
| Zalophus wolfebaeki SRR4431565 1      | Xenogale naso C07XAR110 1            | 0,18814172 |
| Ursus thibetanus mupiniensis NC008753 | Canis anthus NC027956 2              | 0,18814187 |
| Ursus javanicus T413 1                | Chrysocyon brachyurus NC024172 1     | 0,18814231 |
| Martes pennanti NC020664 16           | Ailuropoda melanoleuca NC009492 5    | 0,18814234 |
| Neovison vison NC020641 3             | Galidia elegans D146 1               | 0,1881427  |
| Galictis vittata T412 1               | Chrotogale owstoni T607 1            | 0,18814304 |
| Mustela frenata NC020640 1            | Crocota crocata NC020670 3           | 0,18814358 |
| Lutrogale perspicillata NC035811 1    | Caracal caracal NC028306 1           | 0,18814363 |
| Lutrogale perspicillata NC035811 1    | Helarctos malayanus NC009968 2       | 0,18814447 |
| Otaria byronia OTAB 1                 | Genetta genetta T297 1               | 0,18814574 |
| Panthera tigris amoyensis NC014770 2  | Canis latrans NC008093 7             | 0,18814668 |
| Ursus arctos GUS73491 207             | Lynx lynx NC027083 4                 | 0,1881468  |
| Ursus arctos EU497665 29              | Lynx canadensis NC028313 1           | 0,18814728 |
| Mungos mungo MNC7 1                   | Melursus ursinus NC009970 2          | 0,18814749 |
| Ursus arctos EU497665 29              | Lynx pardinus NC028319 161           | 0,18814781 |
| Melursus ursinus NC009970 2           | Galidictis fasciata DM333 1          | 0,18814828 |
| Nyctereutes procyonoides NC013700 3   | Arctictis binturong T605 2           | 0,18815288 |
| Ursus arctos AP012576 6               | Procyon lotor AB462049 4             | 0,18815495 |
| Ursus thibetanus laniger MH281753 2   | Paradoxurus hermaphroditus NC03959   | 0,18815982 |
| Ursus thibetanus thibetanus NC011113  | Panthera onca KP202264 2             | 0,18815985 |
| Martes flavigula NC012141 3           | Diplogale hoesi MH464790 1           | 0,18816034 |
| Ursus javanicus/auripunctata NC006835 | Arctocepalus forsteri KT693377 17    | 0,18816131 |
| Ursus arctos AP012576 6               | Catopuma temminckii NC027115 41      | 0,18816738 |
| Smlodon populator MF871700 1          | Lutrogale perspicillata NC035811 1   | 0,18816741 |
| Ursus americanus JX196366 3           | Salanoia concolor D378 1             | 0,18816999 |
| Ursus thibetanus formosanus NC009331  | Mephitis mephitis NC020648 1         | 0,18817128 |
| Lontra canadensis SRR10409165 1       | Arctocepalus forsteri NC004023 28    | 0,18817123 |
| Ursus spelaeus NC011122 8             | Lycalopex sechurae KT448284 1        | 0,18817264 |
| Ursus thibetanus laniger MH281753 2   | Mephitis mephitis NC020648 1         | 0,18817377 |
| Panthera leo NERO 19                  | Arctocepalus pusillus NC008417 1     | 0,18817562 |
| Panthera pardus NC010641 5            | Mustela sibirica NC020637 6          | 0,1881762  |
| Potos flavus T414 1                   | Cynogale bennetti KY117544 1         | 0,18817881 |
| Panthera pardus japonensis KJ866876   | Martes flavigula NC012141 3          | 0,18818137 |
| Panthera uncia KP202269 1             | Eumetopias jubatus NC004030 10       | 0,18818486 |
| Meles leucurus NC039173 4             | Canis mesomelas KT448280 1           | 0,1881866  |
| Eupleres goudoti D128 1               | Canis latrans NC008093 7             | 0,18818741 |
| Ursus thibetanus thibetanus NC011113  | Canis mesomelas KT448280 1           | 0,18818778 |
| Panthera tigris NC010642 35           | Gulo gulo NC009685 3                 | 0,18818887 |
| Vulpes vulpes NC008434 5              | Martes americana NC020642 1          | 0,18818958 |
| Lycaon pictus NC028427 2              | Diplogale hoesi MH464790 1           | 0,18819012 |
| Vulpes zerdia KJ603240 1              | Martes zibellina NC011579 39         | 0,18819103 |
| Suricata suricatta SSM10 1            | Canis anthus NC027956 2              | 0,1881915  |
| Melogale moschata KP726273 1          | Canis anthus NC027956 2              | 0,18819186 |
| Tremarctos ornatus NC009969 2         | Helogale parvula SRR7637809 1        | 0,18819231 |
| Urocyon littoralis catalinae KP129018 | Mustela nigripes NC029492 1          | 0,18819679 |
| Melogale moschata KP726273 1          | Galereilla sanguinea T378 1          | 0,18819739 |
| Panthera uncia KP202269 1             | Meles meles T303 3                   | 0,18819746 |
| Vulpes corsac NC023958 1              | Martes martes T302 3                 | 0,18819746 |
| Vulpes corsac NC023958 1              | Arctotherium sp NC030174 1           | 0,18819892 |
| Panthera pardus japonensis KJ866876   | Lutra lutra LC050126 1               | 0,18819911 |
| Cryptoprocta ferox FC13 1             | Bassaricyon neblina SRX1097850 1     | 0,18819982 |
| Melogale moschata V0735A 1            | Hyaena hyaena NC020669 1             | 0,18819991 |
| Genetta genetta T297 1                | Arctocepalus gazella BK010918 1      | 0,18820126 |
| Prionailurus viverrinus NC028305 1    | Canis mesomelas KT448280 1           | 0,18820153 |
| Panthera pardus japonensis KJ866876   | Melogale moschata V0735A 1           | 0,18820344 |
| Lynx rufus NC014456 3                 | Lontra canadensis SRR10409165 1      | 0,18820445 |
| Panthera uncia spelaea KX258452 2     | Lutra lutra LC050126 1               | 0,18820626 |
| Paradoxurus jerdoni MH464793 1        | Martes martes T302 3                 | 0,18820688 |
| Tremarctos ornatus NC009969 2         | Cryptoprocta ferox FC13 1            | 0,18820733 |
| Lutra lutra LC050126 1                | Ailuropoda melanoleuca NC009492 5    | 0,18820886 |
| Ursus thibetanus mupiniensis NC008753 | Canis latrans NC008093 7             | 0,1882094  |
| Parahaena brunnea NC038159 15         | Arctocepalus pusillus NC008417 1     | 0,18821022 |
| Proteles cristata T393 6              | Aonyx cinerea NC035814 2             | 0,18821082 |
| Vulpes vulpes NC008434 5              | Panthera tigris amoyensis NC014770 2 | 0,18821109 |
| Lycaon pictus NC028427 2              | Ailuurus fulgens NC011124 1          | 0,18821178 |
| Ursus arctos GUS73486 5               | Procyon lotor AB462046 3             | 0,18821399 |
| Ursus maritimus NC003428 31           | Panthera onca KP202264 2             | 0,18821429 |
| Phocarcotus hookeri NC008418 1        | Genetta abyssinica MG489822 1        | 0,18821454 |
| Helarctos malayanus NC009968 2        | Conepatus chinga NC042596 1          | 0,1882153  |
| Ursus arctos isabellinus 1885 2       | Puma concolor NC016470 22            | 0,18821584 |
| Ursus spelaeus EU327344 13            | Crossarchus platycephalus C7R66 1    | 0,18821606 |
| Panthera onca NC022842 1              | Lycalopex sechurae KT448284 1        | 0,18821849 |
| Melogale moschata NC020644 1          | Ailuropoda melanoleuca NC009492 5    | 0,18821965 |
| Mephitis mephitis NC020648 1          | Leopardus pardalis T262 1            | 0,18822049 |
| Salanoia concolor D378 1              | Chrysocyon brachyurus NC024172 1     | 0,18822117 |
| Ursus spelaeus EU327344 13            | Procyon lotor AB462046 3             | 0,18822217 |
| Canis lupus familiaris NC002008 1231  | Ailuurus fulgens NC011124 1          | 0,18822271 |
| Puma concolor NC0016470 22            | Melursus ursinus NC009970 2          | 0,18823071 |
| Panthera pardus NC010641 5            | Meles meles T303 3                   | 0,18823816 |
| Ursus americanus JX196366 3           | Canis anthus NC027956 2              | 0,18824126 |
| Poecilogale albinucha T602 1          | Cuon alpinus NC013445 3              | 0,18824439 |
| Ursus americanus JX196366 3           | Felis chaus NC028307 1               | 0,18824747 |
| Helarctos malayanus NC009968 2        | Canis mesomelas KT448280 1           | 0,18824859 |
| Meles anakuma NC009677 1              | Helogale parvula SRR7637809 1        | 0,18825325 |
| Vulpes corsac NC023958 1              | Lutra lutra LC050126 1               | 0,18825413 |
| Lontra canadensis SRR10409165 1       | Atilax paludinosus T606 1            | 0,18825516 |
| Melogale moschata KP726273 1          | Bdeogale nigripes GLC15 1            | 0,18825541 |
| Tremarctos ornatus NC009969 2         | Xenogale naso C07XAR110 1            | 0,18825649 |
| Suricata suricatta SSM10 1            | Arctocepalus forsteri KT693377 17    | 0,18825693 |
| Vulpes vulpes NC008434 5              | Meles meles T303 3                   | 0,1882578  |
| Vulpes lagopus NC026529 3             | Mungos mungo MNC7 1                  | 0,18825859 |
| Conepatus chinga NC042596 1           | Bassaricyon neblina SRX1097850 1     | 0,18825983 |
| Procyon lotor AB462049 4              | Mungos mungo/gambianus SRR77048      | 0,18826073 |
| Vulpes corsac NC023958 1              | Mustela eversmannii NC028013 1       | 0,18826084 |

|                                        |                                       |            |
|----------------------------------------|---------------------------------------|------------|
| Viverricula indica KX891751 1          | Mirounga leonina NC008422 1           | 0,16914499 |
| Ursus arctos EU497665 29               | Erigonathus barbatus NC008426 1       | 0,16914633 |
| Neovison vison NC020641 3              | Ailurus fulgens NC011124 1            | 0,16914754 |
| Panthera onca KP20264 2                | Hydrurga leptonyx NC008425 1          | 0,16915691 |
| Ursus maritimus GU573488 Svalbard      | Phoca largha NC008430 1               | 0,16915701 |
| Pusa sibirica NC008432 2               | Meles anakuma NC009677 1              | 0,16919851 |
| Mustela sibirica NC020637 6            | Cystophora cristata NC008427 1        | 0,16920029 |
| Pusa caspica NC008431 1                | Mustela putorius NC020638 4           | 0,16920073 |
| Phoca vitulina NC001325 1              | Meles anakuma NC009677 1              | 0,16920993 |
| Ursus arctos GU573486 5                | Pusa caspica NC008431 1               | 0,16921897 |
| Lobodon carcinophaga NC008423 1        | Leopardus pardalis T262 1             | 0,16922428 |
| Prionailurus bengalensis CKM45 20      | Lobodon carcinophaga NC008423 1       | 0,16922674 |
| Ursus maritimus NC003428 31            | Lobodon carcinophaga NC008423 1       | 0,16922837 |
| Ursus maritimus NC003428 31            | Monachus schauinslandi NC008421 1     | 0,16922879 |
| Monachus monachus NC044972 5           | Meles leucurus NC039173 4             | 0,16923049 |
| Ursus arctos GU573486 5                | Monachus schauinslandi NC008421 1     | 0,16923554 |
| Phoca fasciata NC008428 1              | Leopardus colocolo NC028314 1         | 0,16924208 |
| Pusa caspica NC008431 1                | Martes flavigula NC012141 3           | 0,1692448  |
| Ursus spelaeus EU327344 13             | Monachus schauinslandi NC008421 1     | 0,16924576 |
| Ursus americanus JX196366 3            | Phoca groenlandica NC008429 54        | 0,16924581 |
| Halichoerus grypus NC001602 2          | Bassariscus sumichrasti SRX1099089 1  | 0,16924956 |
| Martes martes T303 3                   | Halichoerus grypus NC001602 2         | 0,16925628 |
| Pusa caspica NC008431 1                | Mustela kathiah NC023210 1            | 0,1692678  |
| Erigonathus barbatus NC008426 1        | Crossarchus platycephalus C7R66 1     | 0,16927013 |
| Leptonychotes weddellii NC008424 1     | Eupleres goudotii D128 1              | 0,16927044 |
| Martes pennanti NC020664 16            | Erigonathus barbatus NC008426 1       | 0,16927108 |
| Procyon lotor AB462049 4               | Leptonychotes weddellii NC008424 1    | 0,16927236 |
| Viverra tangalunga MH464792 1          | Ailurus fulgens styani NC009691 1     | 0,16927263 |
| Mirounga angustirostris SRR10331586 1  | Lutra sumatrana NC035810 1            | 0,16927283 |
| Phoca largha NC008430 1                | Mustela itatsi NC034330 19            | 0,16928026 |
| Puma yagouaroundi NC028311 1           | Erigonathus barbatus NC008426 1       | 0,16928147 |
| Phoca vitulina NC001325 1              | Melogale moschata NC020644 1          | 0,16928525 |
| Ursus arctos isabellinus 18B5 2        | Phoca fasciata NC008428 1             | 0,16928735 |
| Phoca largha NC008430 1                | Neovison vison NC020641 3             | 0,16928895 |
| Mirounga leonina NC008422 1            | Leopardus colocolo NC028314 1         | 0,16929808 |
| Pusa hispida NC 008433 1               | Leopardus colocolo NC028314 1         | 0,16931103 |
| Mustela itatsi NC034330 19             | Halichoerus grypus NC001602 2         | 0,16931574 |
| Pusa caspica NC008431 1                | Melogale moschata V0735A 1            | 0,16933382 |
| Mustela sibirica AP017394 11           | Cystophora cristata NC008427 1        | 0,1693348  |
| Mustela frenata NC020640 1             | Ailurus fulgens NC011124 1            | 0,16933489 |
| Pusa caspica NC008431 1                | Mustela itatsi NC034330 19            | 0,16933558 |
| Nandinia binotata NC024567 1           | Mustela frenata NC020640 1            | 0,16933586 |
| Fossa fossana D350 1                   | Erigonathus barbatus NC008426 1       | 0,16933747 |
| Procyon lotor AB462046 3               | Mustela itatsi NC034330 19            | 0,16933808 |
| Potos flavus T414 1                    | Nandinia binotata NC024567 1          | 0,16933914 |
| Phoca fasciata NC008428 1              | Meles anakuma NC009677 1              | 0,16934064 |
| Pardofelis marmorata NLN3 2            | Leptonychotes weddellii NC008424 1    | 0,16934641 |
| Phoca largha NC008430 1                | Mustela sibirica AP017394 11          | 0,16934662 |
| Phoca vitulina NC001325 1              | Mustela itatsi NC034330 19            | 0,16934735 |
| Mustela altaica NC021751 1             | Lobodon carcinophaga NC008423 1       | 0,16935505 |
| Ursus maritimus GU573488 Svalbard      | Monachus schauinslandi NC008421 1     | 0,16936357 |
| Ursus thibetanus thibetanus NC011118 4 | Monachus monachus NC044972 5          | 0,16936682 |
| Potos flavus T414 1                    | Lontra canadensis SRR10409165 1       | 0,1694023  |
| Phoca fasciata NC008428 1              | Enhydra lutris NC009692 1             | 0,16940567 |
| Phoca groenlandica NC008429 54         | Mustela nigripes NC024942 1           | 0,16941202 |
| Pusa sibirica NC008432 2               | Neovison vison NC020641 3             | 0,16941239 |
| Phoca largha NC008430 1                | Mustela kathiah NC023210 1            | 0,16941373 |
| Ursus thibetanus thibetanus NC011118 4 | Halichoerus grypus NC001602 2         | 0,16941404 |
| Procyon lotor AB462049 4               | Mustela nivalis T306 5                | 0,16941439 |
| Hydrurga leptonyx NC008425 1           | Attilax paludinosus T606 1            | 0,16941604 |
| Ursus thibetanus mupinensis NC008753 2 | Mirounga leonina NC008422 1           | 0,1694179  |
| Procyon lotor AB462049 4               | Hydrurga leptonyx NC008425 1          | 0,16941901 |
| Puma concolor NC016470 22              | Lobodon carcinophaga NC008423 1       | 0,169425   |
| Prionailurus bengalensis NC028301 12   | Mirounga angustirostris SRR10331586 1 | 0,16942723 |
| Martes flavigula NC012141 3            | Halichoerus grypus NC001602 2         | 0,16943221 |
| Monachus schauinslandi NC008421 1      | Leopardus colocolo NC028314 1         | 0,16944367 |
| Pusa sibirica NC008432 2               | Mustela itatsi NC034330 19            | 0,1694707  |
| Meles meles T303 3                     | Ailurus fulgens NC011124 1            | 0,16947319 |
| Meles leucurus NC039173 4              | Ailurus fulgens NC011124 1            | 0,1694732  |
| Phoca fasciata NC008428 1              | Melogale moschata V0735A 1            | 0,1694767  |
| Ursus thibetanus laniger MH281753 2    | Halichoerus grypus NC001602 2         | 0,16947825 |
| Phoca largha NC008430 1                | Melogale moschata V0735A 1            | 0,16948113 |
| Phoca vitulina NC001325 1              | Mustela sibirica AP017394 11          | 0,1694814  |
| Prionailurus planiceps KY682741 4      | Leptonychotes weddellii NC008424 1    | 0,16948172 |
| Mungos mungo MNC7 1                    | Hydrurga leptonyx NC008425 1          | 0,16948316 |
| Ursus arctos pruinus MG066703 3        | Leptonychotes weddellii NC008424 1    | 0,16948864 |
| Phoca groenlandica NC008429 54         | Neovison vison NC020641 3             | 0,16948912 |
| Viverricula indica KX891745 1          | Monachus schauinslandi NC008421 1     | 0,16949407 |
| Monachus monachus NC044972 5           | Lutra lutra LC050126 1                | 0,16949907 |
| Ursus arctos isabellinus 18B5 2        | Phoca largha NC008430 1               | 0,16949359 |
| Phoca largha NC008430 1                | Urocyon v. stratus T299 1             | 0,16949596 |
| Panthera onca NC022842 1               | Hydrurga leptonyx NC008425 1          | 0,16950506 |
| Martes melampus NC009678 1             | Halichoerus grypus NC001602 2         | 0,16951647 |
| Mustela sibirica AP017394 11           | Erigonathus barbatus NC008426 1       | 0,16953593 |
| Procyon lotor AB462049 4               | Mustela sibirica AP017394 11          | 0,16953988 |
| Cystophora cristata NC008427 1         | Aonyx cinerea NC035814 2              | 0,1695424  |
| Phoca fasciata NC008428 1              | Mustela nigripes NC024942 1           | 0,16954635 |
| Pusa hispida NC 008433 1               | Mustela eversmannii NC028013 1        | 0,16954722 |
| Phoca vitulina NC001325 1              | Enhydra lutris NC009692 1             | 0,16954723 |
| Ursus maritimus NC003428 31            | Pusa sibirica NC008432 2              | 0,16954964 |
| Mustela kathiah NC023210 1             | Mirounga angustirostris SRR10331586 1 | 0,16954985 |
| Pusa sibirica NC008432 2               | Catopuma badia NC028300 1             | 0,16955177 |
| Leopardus wiedii NC028318 1            | Cystophora cristata NC008427 1        | 0,16955347 |
| Phoca vitulina NC001325 1              | Martes pennanti NC020664 16           | 0,16955487 |
| Lobodon carcinophaga NC008423 1        | Galerella sanguinea T378 1            | 0,16956018 |
| Ursus arctos GU573486 5                | Phoca groenlandica NC008429 54        | 0,16956313 |
| Ursus arctos EU497665 29               | Monachus monachus NC044972 5          | 0,16956573 |
| Leptonychotes weddellii NC008424 1     | Chrotogale owstoni T607 1             | 0,16959606 |
| Pusa caspica NC008431 1                | Mustela eversmannii NC028013 1        | 0,16960439 |
| Phoca groenlandica NC008429 54         | Lutra lutra NC011358 9                | 0,16960622 |
| Mirounga leonina NC008422 1            | Fossa fossana D350 1                  | 0,16960679 |
| Procyon lotor AB462049 4               | Poecilogale albinucha T602 1          | 0,16961385 |
| Phoca groenlandica NC008429 54         | Ailurus fulgens styani NC009691 1     | 0,16961585 |

|                                       |                                      |            |
|---------------------------------------|--------------------------------------|------------|
| Procyon lotor AB462046 3              | Galerella sanguinea T378 1           | 0,18826142 |
| Nyctereutes procyonoides NC013700 3   | Mustela eversmannii NC028013 1       | 0,1882616  |
| Vulpes ferrillata NC027935 1          | Viverra tangalunga MH464792 1        | 0,18826284 |
| Nasua nasua NC020647 1                | Arctocepalus pusillus NC008417 1     | 0,18826294 |
| Viverricula indica KX891751 1         | Arctocepalus forsteri KT693377 17    | 0,18826331 |
| Mungos mungo/gambianus SRR77048       | Arctotherium sp NC030174 1           | 0,18826489 |
| Mungos mungo MNC7 1                   | Arctotherium sp NC030174 1           | 0,18826513 |
| Ursus arctos EU497665 29              | Lutra lutra LC050126 1               | 0,18826686 |
| Ursus maritimus NC003428 31           | Crossarchus platycephalus C7R66 1    | 0,18826985 |
| Ursus arctos EU497665 29              | Crossarchus platycephalus C7R66 1    | 0,18826988 |
| Felis catus NC001700 2                | Arctocepalus forsteri KT693377 17    | 0,18827009 |
| Felis margarita NC028308 1            | Arctocepalus townsendi NC008420 1    | 0,18827014 |
| Parahyaena brunnea NC038159 15        | Lontra canadensis SRR10409165 1      | 0,18827014 |
| Parahyaena brunnea NC038159 15        | Melogale moschata V0735A 1           | 0,18827075 |
| Vulpes zerda KJ603240 1               | Caracal caracal NC028306 1           | 0,1882724  |
| Ictonyx striatus T299 1               | Cynictis penicillata T375 1          | 0,18827245 |
| Viverra zibetha T609 1                | Aonyx cinerea NC035814 2             | 0,18827249 |
| Leopardus jacobita NC028322 1         | Canis anthus NC027956 2              | 0,18827307 |
| Ursus maritimus GU573488 Svalbard     | Salanoia concolor D378 1             | 0,18827315 |
| Zalophus wolfebaeki SRR4431565 1      | Felis vulpes NC008434 5              | 0,18827394 |
| Puma concolor NC0016470 22            | Neophoca cinerea NC008419 1          | 0,18827434 |
| Proteles cristata T393 6              | Lutra sumatrana NC035810 1           | 0,18827501 |
| Odobenus rosmarus NC004029 29         | Meles meles T303 3                   | 0,18827538 |
| Hyena hyena NC020669 1                | Arctocepalus pusillus NC008417 1     | 0,18827635 |
| Procyon lotor AB462046 3              | Panthera uncia KP202269 1            | 0,18827659 |
| Ursus americanus JX196366 3           | Canis lupus familiaris NC002008 1231 | 0,18827772 |
| Leopardus pardalis T262 1             | Bassaricyon neblina SRX1097850 1     | 0,18827863 |
| Ursus javanicus/auripunctata NC006835 | Eumetopias jubatus NC004030 10       | 0,18827964 |
| Ursus arctos EU497665 29              | Genetta genetta T297 1               | 0,18827964 |
| Ursus thibetanus laniger MH281753 2   | Lutrogale perspicillata NC035811 1   | 0,18828009 |
| Ursus javanicus T413 1                | Gallitictis vittata T412 1           | 0,18828051 |
| Viverricula indica KX891751 1         | Otaria byronia OTAB 1                | 0,1882811  |
| Poecilogale albinucha T602 1          | Lycaon pictus NC028427 2             | 0,18828298 |
| Ursus arctos pruinus MG066703 3       | Leopardus jacobita NC028322 1        | 0,18828326 |
| Ursus maritimus NC003428 31           | Prionailurus viverrinus NC028305 1   | 0,18828344 |
| Ursus arctos pruinus MG066703 3       | Caracal caracal NC028306 1           | 0,18828455 |
| Ursus arctos pruinus MG066703 3       | Paradoxurus jerdoni MH464793 1       | 0,18828498 |
| Zalophus wolfebaeki SRR4431565 1      | Panthera uncia KP202269 1            | 0,18828616 |
| Ursus maritimus NC003428 31           | Leopardus guigna NC028321 1          | 0,18828721 |
| Helarctos malayanus NC009968 2        | Canis anthus NC027956 2              | 0,1882875  |
| Panthera leo spelaea KX258452 2       | Arctodus simus NC011116 1            | 0,18828888 |
| Urocyon cinereoargenteus NC026723 2   | Leopardus colocolo NC028314 1        | 0,18828954 |
| Ursus thibetanus mupinensis NC008753  | Diplogale hosei MH464790 1           | 0,18829089 |
| Panthera pardus NC010641 5            | Eumetopias jubatus NC004030 10       | 0,18829247 |
| Lontra canadensis SRR10409165 1       | Hemigalus derbyanus MH464791 1       | 0,18829274 |
| Ictonyx striatus T299 1               | Canis mesomelas KT448280 1           | 0,18829346 |
| Ursus thibetanus laniger MH281753 2   | Panthera onca KP202264 2             | 0,18829367 |
| Ursus thibetanus laniger MH281753 2   | Pardofelis marmorata NLN3 2          | 0,18829466 |
| Ursus spelaeus NC011112 8             | Ichneumia albicauda T603 1           | 0,18829545 |
| Otocyon megalotis SAF1 2              | Acinonyx jubatus NC005212 3          | 0,18829601 |
| Ursus americanus JX196366 3           | Crossarchus platycephalus C7R66 1    | 0,18829834 |
| Nyctereutes procyonoides NC013700 3   | Gulo gulo NC009685 3                 | 0,18830206 |
| Spilogale putorius NC010497 1         | Prionodon linsang ERR2391707 1       | 0,18830356 |
| Neofelis nebulosa NC008450 3          | Lutra sumatrana NC035810 1           | 0,18830486 |
| Canis mesomelas KT448280 1            | Ailurus fulgens styani NC009691 1    | 0,1883074  |
| Ursus americanus JX196366 3           | Felis silvestris lybica KP020275 4   | 0,18831353 |
| Ursus maritimus NC003428 31           | Spilogale putorius NC010497 1        | 0,18831377 |
| Urocyon littoralis catalinae KP129018 | Martes flavigula NC012141 3          | 0,18831456 |
| Meleucus ursinus NC009970 2           | Acinonyx jubatus NC005212 3          | 0,18831497 |
| Ursus americanus JX196366 3           | Leopardus guigna NC028321 1          | 0,18831803 |
| Suricata suricatta SSM10 1            | Enhydra lutris NC009692 1            | 0,18831873 |
| Helogale parvula SRR7637809 1         | Enhydra lutris NC009692 1            | 0,188319   |
| Lontra canadensis SRR10409165 1       | Genetta abyssinica MG489822 1        | 0,18832092 |
| Mustela sibirica AP017394 11          | Helogale parvula SRR7637809 1        | 0,18832298 |
| Ursus brachyura KY117547 1            | Arctocepalus forsteri KT693377 17    | 0,18832341 |
| Phocarcotus hookeri NC008418 1        | Lontra canadensis SRR10409165 1      | 0,18832371 |
| Mustela eversmannii NC028013 1        | Bdeogale nigripes GLC15 1            | 0,18832427 |
| Helogale parvula SRR7637809 1         | Arctocepalus australis MG023139 1    | 0,18832438 |
| Vulpes vulpes NC008434 5              | Attilax paludinosus T606 1           | 0,18832502 |
| Nasua nasua NC020647 1                | Nandinia binotata NC024567 1         | 0,18832532 |
| Helogale parvula SRR7637809 1         | Canis anthus NC027956 2              | 0,18832575 |
| Vulpes ferrillata NC027935 1          | Fossa fossana D350 1                 | 0,18832646 |
| Vulpes vulpes NC008434 5              | Mustela eversmannii NC028013 1       | 0,18832792 |
| Gallitictis fasciata DM333 1          | Arctocepalus forsteri KT693377 17    | 0,18833044 |
| Meles meles T303 3                    | Hyena hyena NC020669 1               | 0,18833436 |
| Mustela altaica NC021751 1            | Bdeogale nigripes GLC15 1            | 0,1883346  |
| Ursus maritimus GU573488 Svalbard     | Lutra lutra NC011358 9               | 0,18833539 |
| Poecilogale albinucha T602 1          | Mungos mungo/gambianus SRR77048      | 0,1883357  |
| Felis chaus NC028307 1                | Arctocepalus forsteri KT693377 17    | 0,18833773 |
| Lontra canadensis SRR10409165 1       | Canis aureus KT448274 1              | 0,1883385  |
| Panthera onca KP202264 2              | Canis anthus NC027956 2              | 0,18833953 |
| Panthera pardus japonensis KJ866876   | Canis anthus NC027956 2              | 0,18833989 |
| Cryptoprocta ferox CFC13 1            | Arctocepalus gazella BK010918 1      | 0,18834086 |
| Puma concolor NC016470 22             | Phocarcotus hookeri NC008418 1       | 0,18834122 |
| Speothos venaticus C48 2              | Mustela eversmannii NC028013 1       | 0,18834123 |
| Ursus maritimus NC003428 31           | Procyon lotor AB462046 3             | 0,18834215 |
| Ursus arctos EU497665 29              | Procyon lotor AB462046 3             | 0,18834218 |
| Panthera tigris NC010642 35           | Arctonyx collaris NC020645 1         | 0,18834355 |
| Panthera tigris NC010642 35           | Enhydra lutris NC009692 1            | 0,18834367 |
| Procyon lotor AB462049 4              | Paradoxurus hermaphroditus NC03959   | 0,188344   |
| Tremarctos ornatus NC009969 2         | Parahyaena brunnea NC038159 15       | 0,18834433 |
| Otocyon megalotis SAF1 2              | Genetta genetta T297 1               | 0,18834469 |
| Prionodon linsang ERR2391707 1        | Ailuropoda melanoleuca NC009492 5    | 0,18834585 |
| Profelis aurata NC028299 1            | Aonyx cinerea NC035814 2             | 0,18834619 |
| Ursus arctos GU573486 5               | Salanoia concolor D378 1             | 0,18834649 |
| Ursus arctos GU573491 207             | Genetta genetta T297 1               | 0,1883468  |
| Panthera tigris amoyensis NC014770 2  | Martes zibellina NC011579 39         | 0,18834797 |
| Ursus arctos isabellinus 18B5 2       | Lynx canadensis NC028313 1           | 0,18834865 |
| Ursus arctos EU497665 29              | Panthera onca KP202264 2             | 0,18834905 |
| Ursus maritimus GU573488 Svalbard     | Puma concolor NC0016470 22           | 0,18835105 |
| Ursus maritimus NC003428 31           | Puma concolor NC0016470 22           | 0,18835106 |
| Speothos venaticus C48 2              | Prionailurus viverrinus NC028305 1   | 0,18835139 |
| Speothos venaticus C48 2              | Felis nigripes NC028309 1            | 0,18835177 |

|                                       |                                       |            |
|---------------------------------------|---------------------------------------|------------|
| Profelis aurata NC028299 1            | Leptonychotes weddellii NC008424 1    | 0,16961712 |
| Ursus maritimus NC003428 31           | Erignathus barbatus NC008426 1        | 0,16961755 |
| Ursus maritimus GU573488 Svalbard     | Erignathus barbatus NC008426 1        | 0,16961756 |
| Pusa sibirica NC008432 2              | Ictonyx striatus T299 1               | 0,1696185  |
| Mirounga angustirostris SRR10331586 1 | Hemigalus derbyanus MH464791 1        | 0,16962063 |
| Ictonyx striatus T299 1               | Bassariscus sumichrasti SRX1099089 1  | 0,16962098 |
| Ursus maritimus NC003428 31           | Pusa hispida NC 008433 1              | 0,16963072 |
| Monachus schauinslandi NC008421 1     | Martes flavigula NC012141 3           | 0,16964933 |
| Halichoerus grypus NC001602 2         | Enhydra lutris NC009692 1             | 0,16965184 |
| Ursus maritimus NC003428 31           | Monachus monachus NC044972 5          | 0,16965294 |
| Phoca fasciata NC008428 1             | Monachus monachus NC012141 3          | 0,16965331 |
| Diplogale hosi MH464790 1             | Crocota crocata NC020670 3            | 0,16966327 |
| Monachus monachus NC044972 5          | Helarctos malayanus NC009968 2        | 0,16966738 |
| Procyon lotor AB462046 3              | Lutra lutra LC050126 1                | 0,16967177 |
| Pusa sibirica NC008432 2              | Mustela nigripes NC024942 1           | 0,16967252 |
| Leptonychotes weddellii NC008424 1    | Attilax paludinosus T606 1            | 0,16967411 |
| Mirounga leonina NC008422 1           | Crossarchus platycephalus C7R66 1     | 0,16967411 |
| Leptonychotes weddellii NC008424 1    | Canis latrans NC008093 7              | 0,16967522 |
| Procyon lotor AB462046 3              | Melogale moschata KP726273 1          | 0,16967647 |
| Pusa caspica NC008431 1               | Aonyx cinerea NC035814 2              | 0,16967684 |
| Mustela putorius NC020638 4           | Monachus schauinslandi NC008421 1     | 0,16968167 |
| Ursus maritimus GU573488 Svalbard     | Pusa sibirica NC008432 2              | 0,16968432 |
| Phoca groenlandica NC008429 54        | Melogale moschata NC020644 1          | 0,16968469 |
| Ursus americanus JX196366 3           | Monachus monachus NC044972 5          | 0,16968751 |
| Lobodon carcinophaga NC008423 1       | Leopardus guigna NC028321 1           | 0,16969709 |
| Phoca vitulina NC001325 1             | Ictonyx striatus T299 1               | 0,16969807 |
| Ursus spelaeus EU327344 13            | Phoca vitulina NC001325 1             | 0,16970849 |
| Mustela sibirica AP017394 11          | Halichoerus grypus NC001602 2         | 0,16971937 |
| Smilodon populator MF871700 1         | Hydrurga leptonyx NC008425 1          | 0,16972138 |
| Martes zibellina NC011579 39          | Halichoerus grypus NC001602 2         | 0,16972241 |
| Potos flavus T414 1                   | Melogale moschata V0735A 1            | 0,16973843 |
| Pusa sibirica NC008432 2              | Mustela kathiah NC023210 1            | 0,16973935 |
| Pusa sibirica NC008432 2              | Fossa fossana D350 1                  | 0,16974145 |
| Procyon lotor AB462046 3              | Mirounga leonina NC008422 1           | 0,16974555 |
| Taxidea taxus NC020646 1              | Bassaricyon neblina SRX1097850 1      | 0,1697496  |
| Viverra tangalunga MH464792 1         | Mirounga angustirostris SRR10331586 1 | 0,16975181 |
| Phoca groenlandica NC008429 54        | Mustela nivalis T306 5                | 0,16975789 |
| Pardofelis marmorata N123 2           | Hydrurga leptonyx NC008425 1          | 0,16976222 |
| Neovison vison NC020641 3             | Mirounga angustirostris SRR10331586 1 | 0,16976234 |
| Ursus arctos GU573486 5               | Phoca vitulina NC001325 1             | 0,16976944 |
| Lobodon carcinophaga NC008423 1       | Ailuropoda melanoleuca NC009492 5     | 0,16977744 |
| Phoca largha NC008430 1               | Homotherium latidens MF871702 3       | 0,16977443 |
| Mirounga leonina NC008422 1           | Martes melampus NC009678 1            | 0,16979839 |
| Mustela itatsi NC034330 19            | Ailurus fulgens styani NC009691 1     | 0,16981098 |
| Pusa sibirica NC008432 2              | Martes pennanti NC020664 16           | 0,16981176 |
| Procyon lotor AB462046 3              | Martes pennanti NC020664 16           | 0,16981561 |
| Mustela altaica NC021751 1            | Cystophora cristata NC008427 1        | 0,16981736 |
| Phoca fasciata NC008428 1             | Ailurus fulgens styani NC009691 1     | 0,16981761 |
| Lynx rufus NC014456 3                 | Cystophora cristata NC008427 1        | 0,16981959 |
| Ursus maritimus GU573488 Svalbard     | Phoca groenlandica NC008429 54        | 0,16982619 |
| Leptonychotes weddellii NC008424 1    | Ailuropoda melanoleuca NC009492 5     | 0,16982901 |
| Ursus maritimus GU573488 Svalbard     | Pusa hispida NC 008433 1              | 0,1698328  |
| Ursus arctos EU497665 29              | Monachus schauinslandi NC008421 1     | 0,16983528 |
| Ursus spelaeus NC011112 8             | Mirounga angustirostris SRR10331586 1 | 0,16984662 |
| Mirounga angustirostris SRR10331586 1 | Gulo gulo NC009685 3                  | 0,16984665 |
| Ommatophoca rossii AY377287etc 1      | Arctotherium sp NC030174 1            | 0,16986935 |
| Enhydra lutris NC009692 1             | Cystophora cristata NC008427 1        | 0,16987041 |
| Pusa sibirica NC008432 2              | Melogale moschata V0735A 1            | 0,16987269 |
| Viverra tangalunga MH464792 1         | Pusa caspica NC008431 1               | 0,16987428 |
| Viverra tangalunga MH464792 1         | Pusa sibirica NC008432 2              | 0,16987459 |
| Pusa caspica NC008431 1               | Fossa fossana D350 1                  | 0,16987611 |
| Monachus schauinslandi NC008421 1     | Meles anakuma NC009677 1              | 0,16987836 |
| Phoca groenlandica NC008429 54        | Melogale moschata KP726273 1          | 0,16988121 |
| Phoca fasciata NC008428 1             | Mustela sibirica AP017394 11          | 0,16988233 |
| Procyon lotor AB462046 3              | Martes pennanti NC020664 16           | 0,16988295 |
| Mirounga leonina NC008422 1           | Leopardus pardalis T262 1             | 0,16988569 |
| Ursus maritimus GU573488 Svalbard     | Pusa caspica NC008431 1               | 0,16988626 |
| Pusa sibirica NC008432 2              | Leopardus pardalis NC028315 1         | 0,16989106 |
| Phoca vitulina NC001325 1             | Aonyx cinerea NC035814 2              | 0,16989227 |
| Ursus arctos isabellinus 18B5 2       | Phoca groenlandica NC008429 54        | 0,16989352 |
| Ursus arctos GU573491 207             | Phoca largha NC008430 1               | 0,16989781 |
| Ursus arctos pruinosus MG066703 3     | Phoca largha NC008430 1               | 0,16990399 |
| Mirounga leonina NC008422 1           | Gulo gulo NC009685 3                  | 0,16990747 |
| Mustela sibirica NC020637 6           | Halichoerus grypus NC001602 2         | 0,16992114 |
| Melogale moschata NC020644 1          | Halichoerus grypus NC001602 2         | 0,16992956 |
| Viverra tangalunga MH464792 1         | Phoca fasciata NC008428 1             | 0,16995022 |
| Phoca largha NC008430 1               | Mustela sibirica NC020637 6           | 0,16995268 |
| Ursus maritimus NC003428 31           | Pusa caspica NC008431 1               | 0,16995357 |
| Phoca largha NC008430 1               | Fossa fossana D350 1                  | 0,16995756 |
| Phoca fasciata NC008428 1             | Neovison vison NC020641 3             | 0,16996007 |
| Ursus arctos GU573491 207             | Phoca groenlandica NC008429 54        | 0,16996101 |
| Ursus arctos EU497665 29              | Phoca groenlandica NC008429 54        | 0,16996102 |
| Ursus arctos EU497665 29              | Phoca largha NC008430 1               | 0,16996513 |
| Procyon lotor AB462046 3              | Gulo gulo NC009685 3                  | 0,16996834 |
| Meles anakuma NC009677 1              | Halichoerus grypus NC001602 2         | 0,16996849 |
| Procyon lotor AB462049 4              | Gulo gulo NC009685 3                  | 0,16996859 |
| Melogale moschata V0735A 1            | Halichoerus grypus NC001602 2         | 0,16999096 |
| Enhydra lutris NC009692 1             | Ailurus fulgens styani NC009691 1     | 0,16999969 |
| Mustela itatsi NC034330 19            | Erignathus barbatus NC008426 1        | 0,17000797 |
| Mirounga leonina NC008422 1           | Martes pennanti NC020664 16           | 0,17001114 |
| Viverra tangalunga MH464792 1         | Ailurus fulgens styani NC011124 1     | 0,17001356 |
| Mirounga angustirostris SRR10331586 1 | Meles anakuma NC009677 1              | 0,17001694 |
| Phoca vitulina NC001325 1             | Mustela sibirica NC020637 6           | 0,17002021 |
| Phoca vitulina NC001325 1             | Mustela eversmannii NC028013 1        | 0,17002028 |
| Ursus arctos isabellinus 18B5 2       | Pusa sibirica NC008432 2              | 0,17002082 |
| Prionailurus viverrinus NC028305 1    | Cystophora cristata NC008427 1        | 0,17002515 |
| Viverricula indica KX891751 1         | Mirounga angustirostris SRR10331586 1 | 0,17003608 |
| Ursus arctos GU573491 207             | Monachus schauinslandi NC008421 1     | 0,17003702 |
| Phoca largha NC008430 1               | Leopardus pardalis NC028315 1         | 0,17003874 |
| Hydrurga leptonyx NC008425 1          | Arctictis binturong T605 2            | 0,17004237 |
| Phoca vitulina NC001325 1             | Helarctos malayanus NC009968 2        | 0,170046   |
| Ursus maritimus GU573488 Svalbard     | Monachus monachus NC044972 5          | 0,17005703 |
| Monachus monachus NC044972 5          | Martes flavigula NC012141 3           | 0,1700732  |

|                                        |                                      |            |
|----------------------------------------|--------------------------------------|------------|
| Tremarctos ornatus NC009969 2          | Galictis vittata T412 1              | 0,18835206 |
| Ursus thibetanus laniger MH281753 2    | Hyaena hyaena NC020669 1             | 0,18835396 |
| Ursus arctos GU573486 5                | Lynx canadensis NC028313 1           | 0,18835542 |
| Leopardus wiedii NC028318 1            | Ailuropoda melanoleuca NC009492 5    | 0,18835564 |
| Panthera onca NC028242 1               | Mustela altaica NC021751 1           | 0,18835643 |
| Zalophus californianus NC008416 1      | Vulpes vulpes NC008434 5             | 0,18835656 |
| Ursus spelaeus EU327344 13             | Otocolobus manul NC028323 1          | 0,18835987 |
| Ursus thibetanus thibetanus NC011112 8 | Paradoxurus hermaphroditus NC03958   | 0,18836008 |
| Prionailurus bengalensis CKM45 20      | Ailuropoda melanoleuca NC009492 5    | 0,18836109 |
| Canis adustus KT448271 1               | Bassaricyon neblina SRX1097850 1     | 0,18836369 |
| Potos flavus T414 1                    | Canis lupus chanco NC010340 4        | 0,18836375 |
| Gulo gulo NC009685 3                   | Bdeogale nigripes GLC15 1            | 0,1883657  |
| Ursus americanus JX196366 3            | Canis latrans NC008093 7             | 0,18837602 |
| Conepatus chinga NC042596 1            | Arctocepalus townsendi NC008420 1    | 0,18838771 |
| Lynx pardinus NC028319 161             | Cuon alpinus NC013445 3              | 0,18838802 |
| Mungos mungo/gambianus SRR77048        | Lontra canadensis SRR10409165 1      | 0,18838918 |
| Lycalopex secureae KT448284 1          | Leopardus guigna NC028321 1          | 0,18838999 |
| Mustela eversmannii NC028013 1         | Helogale parvula SRR7637809 1        | 0,1883904  |
| Vulpes ferrilata NC027935 1            | Enhydra lutris NC009692 1            | 0,18839157 |
| Vulpes vulpes NC008434 5               | Cynictis penicillata T375 1          | 0,18839176 |
| Vulpes corsac NC023958 1               | Meles meles T303 3                   | 0,18839291 |
| Urocyon littoralis catalinae KP129018  | Martes melampus NC009678 1           | 0,18839347 |
| Urva javanica T413 1                   | Aonyx cinerea NC035814 2             | 0,18839598 |
| Galidictis fasciata DM333 1            | Canis anthus NC027956 2              | 0,18839687 |
| Urocyon cinereoargenteus NC026723 2    | Mustela nigripes NC024942 1          | 0,18839873 |
| Vulpes ferrilata NC027935 1            | Melogale moschata NC020644 1         | 0,18840182 |
| Lycan pictus NC028427 2                | Lutra sumatrana NC035810 1           | 0,18840304 |
| Zalophus californianus NC008416 1      | Panthera leo NERO 19                 | 0,18840382 |
| Panthera uncia KP202269 1              | Martes melampus NC009678 1           | 0,18840386 |
| Vulpes vulpes NC008434 5               | Prionodon pardicolor NC024569 2      | 0,18840444 |
| Felis silvestris lybica KP202275 4     | Arctocepalus townsendi NC008420 1    | 0,18840475 |
| Panthera onca KP202264 2               | Arctocepalus townsendi NC008420 1    | 0,18840489 |
| Martes melampus NC009678 1             | Chrysocyon brachyurus NC024172 1     | 0,18840493 |
| Otocyon megalotis SAF1 2               | Mustela nigripes NC024942 1          | 0,18840495 |
| Vulpes lagopus NC026529 3              | Neovison vison NC020641 3            | 0,18840596 |
| Vulpes zerda KJ603240 1                | Martes foina NC020643 1              | 0,18840688 |
| Lontra canadensis SRR10409165 1        | Felis margarita NC028308 1           | 0,18840778 |
| Neophoca cinerea NC008419 1            | Felis nigripes NC028309 1            | 0,18840924 |
| Vulpes ferrilata NC027935 1            | Leopardus guigna NC028321 1          | 0,18840994 |
| Panthera tigris NC010642 35            | Lutra lutra NC01358 9                | 0,18841124 |
| Urocyon cinereoargenteus NC026723 2    | Prionailurus bengalensis CKM45 20    | 0,188412   |
| Catopuma temminckii NC027115 41        | Bassaricyon neblina SRX1097850 1     | 0,18841268 |
| Eupleres goudoti D128 1                | Canis aureus KT448274 1              | 0,18841292 |
| Prionailurus planiceps KY682741 4      | Otocyon megalotis SAF1 2             | 0,18841499 |
| Panthera leo NERO 19                   | Martes flavigula NC012141 3          | 0,18841526 |
| Ursus maritimus GU573488 Svalbard      | Panthera onca KP202264 2             | 0,18841633 |
| Ursus arctos GU573491 207              | Leopardus pardalis T262 1            | 0,1884173  |
| Ursus thibetanus thibetanus NC011112 8 | Lutrogale perspicillata NC035811 1   | 0,18841742 |
| Ursus arctos pruinosus MG066703 3      | Prionailurus rubiginosus NC028304 2  | 0,18841879 |
| Ursus thibetanus formosanus NC00933    | Bassaricyon neblina SRX1097850 1     | 0,18841903 |
| Panthera uncia KP202269 1              | Martes foina NC020643 1              | 0,18841913 |
| Panthera pardus japonensis KJ866876    | Martes foina NC020643 1              | 0,18841936 |
| Lycalopex secureae KT448284 1          | Urva javanica/aruopunctata NC006835  | 0,18842016 |
| Mephitis mephitis NC020648 1           | Cynogale bennetti KY117544 1         | 0,18842091 |
| Paradoxurus jerdoni MH464793 1         | Galictis vittata T412 1              | 0,18842153 |
| Procyon lotor AB462046 3               | Ailuropoda melanoleuca NC009492 5    | 0,18842228 |
| Ictonyx striatus T299 1                | Cryptoprocta ferox CFC13 1           | 0,18842345 |
| Otocyon megalotis SAF1 2               | Hemigalus derbyanus MH464791 1       | 0,18842368 |
| Urocyon cinereoargenteus NC026723 2    | Acinonyx jubatus NC005212 3          | 0,18842442 |
| Prionailurus rubiginosus NC028304 2    | Mephitis mephitis NC020648 1         | 0,18842475 |
| Ursus thibetanus formosanus NC00933    | Galerella sanguinea T378 1           | 0,18842489 |
| Panthera leo spelaea KX258452 2        | Melogale moschata NC020644 1         | 0,18842585 |
| Melogale moschata V0735A 1             | Canis lupus familiaris NC002008 1231 | 0,18842784 |
| Lontra canadensis SRR10409165 1        | Canis lupus familiaris NC002008 1231 | 0,18842867 |
| Leopardus guigna NC028321 1            | Ailuropoda melanoleuca NC009492 5    | 0,18843085 |
| Ursus arctos AP012576 6                | Lynx lynx NC01358 9                  | 0,18843284 |
| Ursus arctos AP012576 6                | Leopardus pardalis NC028315 1        | 0,18843368 |
| Ursus americanus JX196366 3            | Lutra lutra NC01358 9                | 0,18843758 |
| Ursus thibetanus thibetanus NC011112 8 | Mephitis mephitis NC020648 1         | 0,18844044 |
| Viverricula indica NC025296 2          | Arctocepalus forsteri NC004023 28    | 0,18844368 |
| Gulo gulo NC009685 3                   | Cryptoprocta ferox CFC13 1           | 0,18844463 |
| Gulo gulo NC009685 3                   | Canis mesomelas KT448280 1           | 0,1884471  |
| Ursus arctos EU497665 29               | Spilogale putorius NC010497 1        | 0,18844843 |
| Ictonyx striatus T299 1                | Helarctos malayanus NC009968 2       | 0,18844911 |
| Melogale moschata NC020644 1           | Cuon alpinus NC013445 3              | 0,18844922 |
| Panthera pardus japonensis KJ866876    | Gulo gulo NC009685 3                 | 0,18844944 |
| Martes flavigula NC012141 3            | Galidia elegans D146 1               | 0,18845119 |
| Lynx rufus NC014456 3                  | Cuon alpinus NC013445 3              | 0,18845505 |
| Conepatus chinga NC042596 1            | Arctocepalus forsteri KT693377 17    | 0,18845598 |
| Prionodon linsang ERR2391707 1         | Conepatus chinga NC042596 1          | 0,18845698 |
| Neophoca cinerea NC008419 1            | Lontra canadensis SRR10409165 1      | 0,18845868 |
| Vulpes ferrilata NC027935 1            | Melogale moschata V0735A 1           | 0,18845958 |
| Phocarcos hookeri NC008418 1           | Cynictis penicillata T375 1          | 0,18846096 |
| Urva javanica T413 1                   | Ailurus fulgens styani NC009691 1    | 0,18846107 |
| Vulpes vulpes NC008434 5               | Lutra sumatrana NC035810 1           | 0,18846118 |
| Lycan pictus NC028427 2                | Lutra lutra NC01358 9                | 0,18846434 |
| Speothos venaticus C48 2               | Smilodon populator MF871700 1        | 0,18846367 |
| Lutra lutra NC01358 9                  | Canis mesomelas KT448280 1           | 0,18846379 |
| Procyon lotor AB462046 3               | Urva javanica T413 1                 | 0,18846484 |
| Vulpes ferrilata NC027935 1            | Paradoxurus jerdoni MH464793 1       | 0,18846495 |
| Ursus arctos EU497665 29               | Lutra lutra NC01358 9                | 0,18847014 |
| Meles anakuma NC009677 1               | Hyaena hyaena NC020669 1             | 0,18847063 |
| Panthera uncia KP202269 1              | Martes americana NC020642 1          | 0,18847305 |
| Ursus thibetanus mupinensis NC00879    | Cynictis penicillata T375 1          | 0,18847328 |
| Vulpes ferrilata NC027935 1            | Otocolobus manul NC028323 1          | 0,18847418 |
| Ictonyx striatus T299 1                | Bdeogale nigripes GLC15 1            | 0,18847433 |
| Lycan pictus NC028427 2                | Galidictis fasciata DM333 1          | 0,18847446 |
| Crocota crocata NC020670 3             | Aonyx cinerea NC035814 2             | 0,18847457 |
| Lontra canadensis SRR10409165 1        | Leopardus tigrinus NC028317 1        | 0,18847537 |
| Panthera uncia NC010638 1              | Aonyx cinerea NC035814 2             | 0,18847822 |
| Panthera leo spelaea KX258452 2        | Meles meles T303 3                   | 0,18848044 |
| Ursus arctos isabellinus 18B5 2        | Paradoxurus hermaphroditus N1NC 1    | 0,18848121 |
| Panthera onca KP202264 2               | Martes martes T302 3                 | 0,18848258 |

|                                        |                                       |            |
|----------------------------------------|---------------------------------------|------------|
| Melogale moschata V0735A 1             | Cystophora cristata NC008427 1        | 0,17007445 |
| Phoca groenlandica NC008429 54         | Homotherium latidens MF871702 3       | 0,17007646 |
| Procyon lotor AB462049 4               | Mustela itatsi NC034330 19            | 0,17007834 |
| Erigathus barbatus NC008426 1          | Ailurus fulgens styani NC009691 1     | 0,17007874 |
| Mustela putorius NC020638 4            | Ailurus fulgens styani NC009691 1     | 0,17007965 |
| Viverra tangalunga MH464792 1          | Pusa hispida NC 008433 1              | 0,17008539 |
| Mustela nigripes NC024942 1            | Monachus schauinslandi NC008421 1     | 0,17008579 |
| Leptonychotes weddellii NC008424 1     | Catopuma temminckii NC027115 41       | 0,17008686 |
| Phoca largha NC008430 1                | Mustela eversmannii NC028013 1        | 0,17008752 |
| Leptailurus serval NC028316 1          | Erigathus barbatus NC008426 1         | 0,1700898  |
| Hydrurga leptonyx NC008425 1           | Eupleres goudotii D128 1              | 0,17009103 |
| Neovison vison NC020641 3              | Monachus schauinslandi NC008421 1     | 0,17009388 |
| Mirounga angustirostris SRR10331586 1  | Ailurus fulgens styani NC009691 1     | 0,17009619 |
| Pusa hispida NC 008433 1               | Mustela altaica NC021751 1            | 0,17009695 |
| Hydrurga leptonyx NC008425 1           | Genetta genetta T297 1                | 0,17009979 |
| Ursus spelaeus EU327344 13             | Pusa caspica NC008431 1               | 0,17010105 |
| Prionailurus bengalensis NC028301 12   | Monachus monachus NC044972 5          | 0,17011937 |
| Phoca vitulina NC001325 1              | Leopardus colocolo NC028314 1         | 0,17012346 |
| Ursus arctos GU573486 5                | Monachus monachus NC044972 5          | 0,17013109 |
| Procyon lotor AB462049 4               | Lutra lutra NC011358 9                | 0,17014311 |
| Poecilogale albinucha T602 1           | Mellivora capensis T370 1             | 0,17014472 |
| Phoca groenlandica NC008429 54         | Martes melampus NC009678 1            | 0,17014559 |
| Mustela nigripes NC024942 1            | Ailurus fulgens styani NC009691 1     | 0,17014772 |
| Erigathus barbatus NC008426 1          | Aonyx cinerea NC035814 2              | 0,1701493  |
| Phoca groenlandica NC008429 54         | Mustela sibirica NC020637 6           | 0,17015228 |
| Pusa hispida NC 008433 1               | Ailurus fulgens styani NC009691 1     | 0,17015332 |
| Potos flavus T414 1                    | Ommatophoca rossii AY377287etc 1      | 0,17015468 |
| Lynx canadensis NC028313 1             | Erigathus barbatus NC008426 1         | 0,17015496 |
| Ursus arctos isabellinus 18B5 2        | Mirounga leonina NC008422 1           | 0,17015652 |
| Leopardus geoffroyi NC028320 1         | Cystophora cristata NC008427 1        | 0,17015961 |
| Prionailurus bengalensis CKM45 20      | Cystophora cristata NC008427 1        | 0,17016146 |
| Ursus maritimus NC003428 31            | Phoca groenlandica NC008429 54        | 0,1701628  |
| Cystophora cristata NC008427 1         | Ailuropoda melanoлеuca NC009492 5     | 0,17016427 |
| Lobodon carcinophaga NC008423 1        | Caracal caracal NC028306 1            | 0,17016597 |
| Pusa caspica NC008431 1                | Homotherium latidens MF871702 3       | 0,17016675 |
| Ommatophoca rossii AY377287etc 1       | Bassaricyon sumichrasti SRX1099089 1  | 0,17016748 |
| Phoca largha NC008430 1                | Catopuma badia NC028300 1             | 0,17017029 |
| Monachus monachus NC044972 5           | Meles anakuma NC009677 1              | 0,17017089 |
| Ursus spelaeus EU327344 13             | Pusa hispida NC 008433 1              | 0,17018181 |
| Ursus spelaeus EU327344 13             | Mirounga angustirostris SRR10331586 1 | 0,17018352 |
| Ursus arctos isabellinus 18B5 2        | Monachus monachus NC044972 5          | 0,17019153 |
| Eupleres goudotii D128 1               | Cystophora cristata NC008427 1        | 0,17021282 |
| Mustela itatsi NC034330 19             | Monachus schauinslandi NC008421 1     | 0,17022051 |
| Panthera onca KP202264 2               | Leptonychotes weddellii NC008424 1    | 0,17022142 |
| Pusa hispida NC 008433 1               | Fossa fossana D350 1                  | 0,17022169 |
| Hydrurga leptonyx NC008425 1           | Helogale parvula SRR7637809 1         | 0,17022344 |
| Viverricula indica NC025296 2          | Phoca groenlandica NC008429 54        | 0,17022808 |
| Pusa hispida NC 008433 1               | Mustela nivalis T306 5                | 0,17023018 |
| Viverricula indica XK891745 1          | Mirounga angustirostris SRR10331586 1 | 0,17023784 |
| Ursus arctos AP012576 6                | Erigathus barbatus NC008426 1         | 0,17023863 |
| Erigathus barbatus NC008426 1          | Aconyx jubatus NC005212 3             | 0,17023967 |
| Ommatophoca rossii AY377287etc 1       | Lutra sumatrana NC035810 1            | 0,17024217 |
| Ursus arctos AP012576 6                | Lobodon carcinophaga NC008423 1       | 0,17025374 |
| Mirounga angustirostris SRR10331586 1  | Leopardus colocolo NC028314 1         | 0,17025387 |
| Ursus arctos AP012576 6                | Hydrurga leptonyx NC008425 1          | 0,17025451 |
| Phoca fasciata NC008428 1              | Genetta abyssinica MG489822 1         | 0,17026508 |
| Ursus thibetanus formosanus NC009331 1 | Monachus monachus NC044972 5          | 0,17027007 |
| Ursus arctos AP012576 6                | Monachus monachus NC044972 5          | 0,17027093 |
| Mustela sibirica AP017394 11           | Mirounga leonina NC008422 1           | 0,17027648 |
| Ursus arctos GU573486 5                | Halichoerus grypus NC001602 2         | 0,17028052 |
| Mirounga leonina NC008422 1            | Martes martes T302 3                  | 0,17028099 |
| Phoca groenlandica NC008429 54         | Martes americana NC020642 1           | 0,17028521 |
| Phoca fasciata NC008428 1              | Mustela sibirica NC020637 6           | 0,17028645 |
| Phoca fasciata NC008428 1              | Mustela putorius NC020638 4           | 0,17028666 |
| Phoca largha NC008430 1                | Meles anakuma NC009677 1              | 0,17028722 |
| Phoca groenlandica NC008429 54         | Fossa fossana D350 1                  | 0,17028928 |
| Viverra tangalunga MH464792 1          | Phoca largha NC008430 1               | 0,17029202 |
| Ursus arctos GU573491 207              | Pusa hispida NC008432 2               | 0,17029205 |
| Ursus arctos EU497665 29               | Pusa sibirica NC008432 2              | 0,17029305 |
| Poecilogale albinucha T602 1           | Bassaricyon sumichrasti SRX1099089 1  | 0,17029078 |
| Prionailurus rubiginosus NC028304 2    | Cystophora cristata NC008427 1        | 0,17029259 |
| Viverricula indica NC025296 2          | Monachus schauinslandi NC008421 1     | 0,1703015  |
| Ursus spelaeus EU327344 13             | Pusa sibirica NC008432 2              | 0,17030296 |
| Leopardus colocolo NC028314 1          | Cystophora cristata NC008427 1        | 0,17031175 |
| Ursus arctos pruinosus MG066703 3      | Lobodon carcinophaga NC008423 1       | 0,17031284 |
| Ursus spelaeus NC011112 8              | Phoca vitulina NC001325 1             | 0,17031467 |
| Mustela kathiah NC023210 1             | Halichoerus grypus NC001602 2         | 0,17032181 |
| Mustela eversmannii NC028013 1         | Halichoerus grypus NC001602 2         | 0,17032596 |
| Ursus thibetanus mupinensis NC008753 2 | Monachus monachus NC044972 5          | 0,17032933 |
| Monachus monachus NC044972 5           | Ailuropoda melanoлеuca NC009492 5     | 0,17033492 |
| Lobodon carcinophaga NC008423 1        | Civettictis civetta NC033378 1        | 0,17033783 |
| Ursus thibetanus laniger MH281753 2    | Monachus monachus NC044972 5          | 0,17033842 |
| Catopuma badia NC028300 1              | Canis adustus KT448271 1              | 0,1703416  |
| Mustela nigripes NC024942 1            | Erigathus barbatus NC008426 1         | 0,17034435 |
| Potos flavus T414 1                    | Ailurus fulgens styani NC009691 1     | 0,17034742 |
| Phoca vitulina NC001325 1              | Mustela kathiah NC023210 1            | 0,17035659 |
| Erigathus barbatus NC008426 1          | Catopuma badia NC028300 1             | 0,1703583  |
| Prionailurus bengalensis CKM45 20      | Erigathus barbatus NC008426 1         | 0,17036235 |
| Hydrurga leptonyx NC008425 1           | Galidictis fasciata DM333 1           | 0,17036399 |
| Lynx canadensis NC028313 1             | Lobodon carcinophaga NC008423 1       | 0,17036764 |
| Ursus arctos isabellinus 18B5 2        | Pusa hispida NC 008433 1              | 0,17037103 |
| Mirounga leonina NC008422 1            | Helarctos malayanus NC009968 2        | 0,17037201 |
| Phoca vitulina NC001325 1              | Leopardus pardalis NC028315 1         | 0,17037351 |
| Mirounga leonina NC008422 1            | Genetta abyssinica MG489822 1         | 0,17038591 |
| Mirounga leonina NC008422 1            | Martes americana NC020642 1           | 0,17041107 |
| Pusa sibirica NC008432 2               | Mustela sibirica AP017394 11          | 0,17041261 |
| Pusa sibirica NC008432 2               | Mustela sibirica NC020637 6           | 0,17041272 |
| Mustela kathiah NC023210 1             | Ailurus fulgens styani NC009691 1     | 0,17041765 |
| Mustela nivalis T306 5                 | Ailurus fulgens styani NC009691 1     | 0,17042449 |
| Mungos mungo MM7 1                     | Lobodon carcinophaga NC008423 1       | 0,17042536 |
| Phoca groenlandica NC008429 54         | Aonyx cinerea NC035814 2              | 0,17042693 |
| Procyon lotor AB462049 4               | Lobodon carcinophaga NC008423 1       | 0,17042919 |
| Ursus arctos GU573486 5                | Mirounga leonina NC008422 1           | 0,17043255 |

|                                        |                                      |            |
|----------------------------------------|--------------------------------------|------------|
| Ursus arctos GU573486 5                | Hyaena hyaena NC020669 1             | 0,18848273 |
| Panthera onca KP202264 2               | Otocyon megalotis SAF1 2             | 0,18848288 |
| Prionodon pardicor NC024569 2          | Canis mesomelas KT448280 1           | 0,18848288 |
| Vulpes lagopus NC026529 3              | Arctictis binturong T605 2           | 0,18848309 |
| Ursus thibetanus laniger MH281753 2    | Bdeogale nigripes GLC15 1            | 0,18848334 |
| Ursus arctos isabellinus 18B5 2        | Viels margarita NC028308 1           | 0,18848465 |
| Martes foina NC020643 1                | Lycan pictus NC028427 2              | 0,18848486 |
| Helogale parvula SRR7637809 1          | Helarctos malayanus NC009968 2       | 0,18848501 |
| Ursus arctos GU573491 207              | Prionailurus bengalensis NC028301 12 | 0,18848613 |
| Parahyaena brunnea NC038159 15         | Mustela altaica NC021751 1           | 0,18848634 |
| Ursus arctos AP012576 6                | Genetta genetta T297 1               | 0,18849523 |
| Ursus thibetanus laniger MH281753 2    | Panthera onca KP202269 1             | 0,18849583 |
| Ursus thibetanus mupinensis NC008753 2 | Mephitis mephitis NC020648 1         | 0,18850004 |
| Gulo gulo NC009685 3                   | Canis anthus NC027956 2              | 0,18850465 |
| Speothos venaticus C48 2               | Leopardus colocolo NC028314 1        | 0,1885051  |
| Gulo gulo NC009685 3                   | Galidia elegans D146 1               | 0,18850587 |
| Ursus thibetanus formosanus NC009331 1 | Lycalopex sechurae KT448284 1        | 0,18851233 |
| Procyon lotor AB462049 4               | Panthera leo NERO 19                 | 0,18851446 |
| Ursus americanus JX196366 3            | Leopardus jacobita NC028322 1        | 0,18851636 |
| Puma yagouaroundi NC028311 1           | Arctocepalus forsteri NC004023 28    | 0,18851888 |
| Martes melampus NC009678 1             | Helogale parvula SRR7637809 1        | 0,18852027 |
| Suricata suricatta SSM10 1             | Martes melampus NC009678 1           | 0,18852028 |
| Lutra sumatrana NC035810 1             | Ura brachyura KY117547 1             | 0,18852188 |
| Panthera pardus japonensis KJ866876    | Eumetopias jubatus NC004030 10       | 0,18852212 |
| Ursus arctos GU573486 5                | Spilogale putorius NC010497 1        | 0,18852219 |
| Ursus americanus JX196366 3            | Lycan pictus NC028427 2              | 0,18852313 |
| Ursus thibetanus laniger MH281753 2    | Canis mesomelas KT448280 1           | 0,18852453 |
| Martes americana NC020642 1            | Ura brachyura KY117547 1             | 0,18852463 |
| Melogale moschata V0735A 1             | Cynictis penicillata T375 1          | 0,18852477 |
| Xenogale naso C07XAR110 1              | Arctocepalus australis MG023139 1    | 0,18852654 |
| Vulpes ferrillata NC027935 1           | Martes americana NC020642 1          | 0,18852717 |
| Bdeogale nigripes GLC15 1              | Ailurus fulgens styani NC009691 1    | 0,18852805 |
| Salanoia concolor D378 1               | Otaria byronia OTAB 1                | 0,18853207 |
| Nasua nasua NC020647 1                 | Ailurus fulgens styani NC009691 1    | 0,18853264 |
| Vulpes corsac NC023958 1               | Paguma larvata PDD511 2              | 0,18853605 |
| Prionodon pardicor NC024569 2          | Lontra canadensis SRR10409165 1      | 0,18853673 |
| Melogale moschata NC020644 1           | Canis anthus NC027956 2              | 0,18853675 |
| Panthera uncia NC010638 1              | Mustela putorius NC020638 4          | 0,18853867 |
| Lutrogale perspicillata NC035811 1     | Civettictis civetta GLC19 1          | 0,18853918 |
| Viverricula indica XK891751 1          | Ursus cinereoargenteus NC026723 2    | 0,18853986 |
| Tremarctos ornatus NC009969 2          | Pardofelis marmorata NLN3 2          | 0,18854111 |
| Otocyon littoralis catalinae KP129018  | Lynx canadensis NC028313 1           | 0,1885419  |
| Ursus arctos GU573491 207              | Salanoia concolor D378 1             | 0,18854244 |
| Panthera tigris amoyensis NC014770 2   | Ailurus fulgens NC011124 1           | 0,18854256 |
| Proteles cristata T393 6               | Melogale moschata KP726273 1         | 0,18854287 |
| Pardofelis marmorata NLN3 2            | Neophoca cinerea NC008419 1          | 0,18854305 |
| Paradoxurus jerdoni MH464793 1         | Arctotherium sp NC030174 1           | 0,18854322 |
| Parahyaena brunnea NC038159 15         | Meles anakuma NC009677 1             | 0,18854327 |
| Ursus arctos pruinosus MG066703 3      | Lutrogale perspicillata NC035811 1   | 0,18854426 |
| Vulpes corsac NC023958 1               | Leopardus gulo NC028321 1            | 0,18854463 |
| Procyon lotor AB462049 4               | Lycalopex sechurae KT448284 1        | 0,18854539 |
| Procyon lotor AB462049 4               | Canis mesomelas KT448280 1           | 0,18854542 |
| Meles leucurus NC039173 4              | Crocota crocota NC020670 3           | 0,18854621 |
| Catopuma badia NC028300 1              | Bassaricyon neblina SRX1097850 1     | 0,18854733 |
| Pardofelis marmorata NLN3 2            | Canis mesomelas KT448280 1           | 0,18854766 |
| Lutrogale perspicillata NC035811 1     | Leptailurus serval NC028316 1        | 0,18854777 |
| Panthera uncia KP202269 1              | Martes pennanti NC020664 16          | 0,188548   |
| Proteles cristata T393 6               | Arctocepalus pusillus NC008417 1     | 0,18854974 |
| Zalophus wolfebaeki SRR4431565 1       | Diplogale hosei MH464790 1           | 0,18855017 |
| Mephitis mephitis NC020648 1           | Aonyx cinerea NC035814 2             | 0,1885519  |
| Ursus arctos GU573491 207              | Leopardus wiedii NC028318 1          | 0,1885521  |
| Ursus maritimus NC003428 31            | Leopardus tigrinus NC028317 1        | 0,18855251 |
| Ursus arctos GU573491 207              | Leptailurus serval NC028316 1        | 0,18855377 |
| Ursus arctos GU573491 207              | Prionailurus bengalensis CKM45 20    | 0,18855645 |
| Ursus arctos EU497665 29               | Ursus thibetanus guigna NC028321 1   | 0,18855669 |
| Spilogale putorius NC010497 1          | Civettictis civetta NC033378 1       | 0,18855704 |
| Ursus arctos GU573486 5                | Leopardus jacobita NC028322 1        | 0,18855894 |
| Panthera uncia NC010638 1              | Canis aureus KT448274 1              | 0,18855989 |
| Procyon lotor AB462049 4               | Ura javanica/aroupancata NC006835    | 0,18856779 |
| Zalophus californianus NC008416 1      | Diplogale hosei MH464790 1           | 0,18856782 |
| Martes melampus NC009678 1             | Cuon alpinus NC013445 3              | 0,18856801 |
| Ursus arctos EU497665 29               | Canis aureus KT448274 1              | 0,18857141 |
| Eupleres goudotii D128 1               | Tapirus terrestris T358              | 0,18857764 |
| Procyon lotor AB462049 4               | Canis lupus chanco NC010340 4        | 0,18857786 |
| Mephitis mephitis NC020648 1           | Ailuropoda melanoлеuca NC009492 5    | 0,18857811 |
| Martes pennanti NC020664 16            | Cuon alpinus NC013445 3              | 0,18858045 |
| Ursus americanus JX196366 3            | Lynx canadensis NC028313 1           | 0,18858148 |
| Hyaena hyaena NC020669 1               | Gulo gulo NC009685 3                 | 0,18858297 |
| Canis mesomelas KT448280 1             | Ailurus fulgens NC011124 1           | 0,18858433 |
| Ursus arctos AP012576 6                | Canis aureus KT448274 1              | 0,18858466 |
| Panthera pardus NC010641 5             | Canis anthus NC027956 2              | 0,18858477 |
| Panthera tigris amoyensis NC014770 2   | Canis lupus familiaris NC002008 1231 | 0,18858525 |
| Paguma larvata PDD511 2                | Tapirus terrestris T358              | 0,18858984 |
| Ursus thibetanus mupinensis NC008753 2 | Panthera pardus NC010641 5           | 0,18859108 |
| Martes americana NC020642 1            | Helogale parvula SRR7637809 1        | 0,18859124 |
| Canis aureus KT448274 1                | Ailuropoda melanoлеuca NC009492 5    | 0,18859144 |
| Suricata suricatta SSM10 1             | Mustela nigripes NC024942 1          | 0,1885931  |
| Vulpes vulpes NC008434 5               | Xenogale naso C07XAR110 1            | 0,18859392 |
| Otaria byronia OTAB 1                  | Galidictis fasciata DM333 1          | 0,18859927 |
| Panthera onca KP202264 2               | Ailurus fulgens styani NC009691 1    | 0,18860137 |
| Panthera pardus japonensis KJ866876    | Meles meles T303 3                   | 0,18860188 |
| Bdeogale nigripes GLC15 1              | Arctotherium sp NC030174 1           | 0,18860191 |
| Felis nigripes NC028309 1              | Conepatus chinga NC042596 1          | 0,18860358 |
| Mustela altaica NC021751 1             | Helogale parvula SRR7637809 1        | 0,18860362 |
| Martes americana NC020642 1            | Lycalopex sechurae KT448284 1        | 0,18860584 |
| Neophoca cinerea NC008419 1            | Cryptoprocta ferox CFC13 1           | 0,18860666 |

|                                        |                                       |            |
|----------------------------------------|---------------------------------------|------------|
| Lobodon carcinophaga NC008423 1        | Felis silvestris lybica KP202275 4    | 0,17043503 |
| Ursus maritimus GU573488 Svalbard      | Phoca vitulina NC001325 1             | 0,17043668 |
| Ursus spelaeus NC011112 8              | Pusa caspica NC008431 1               | 0,17043772 |
| Ursus arctos pruinosus MG066703 3      | Phoca fasciata NC008428 1             | 0,17043866 |
| Pusa hispida NC 008433 1               | Prionailurus bengalensis CKM45 20     | 0,17043974 |
| Ursus thibetanus formosanus NC009331 1 | Monachus schauinslandi NC008421 1     | 0,1704516  |
| Mustela nivalis T306 5                 | Cystophora cristata NC008427 1        | 0,17048889 |
| Mirounga leonina NC008422 1            | Leopardus wiedii NC028318 1           | 0,17049184 |
| Viverra zibetha T609 1                 | Mirounga leonina NC008422 1           | 0,17049186 |
| Lobodon carcinophaga NC008423 1        | Leptailurus serval NC028316 1         | 0,17050229 |
| Lyaon pictus NC028427 2                | Lobodon carcinophaga NC008423 1       | 0,17050461 |
| Ursus arctos pruinosus MG066703 3      | Phoca groenlandica NC008429 54        | 0,17050616 |
| Ursus arctos GU573486 5                | Mirounga angustirostris SRR10331586 1 | 0,17051348 |
| Phoca groenlandica NC008429 54         | Martes flavigula NC012141 3           | 0,17052531 |
| Neovison vison NC020641 3              | Halichoerus grypus NC001602 2         | 0,17053622 |
| Halichoerus grypus NC001602 2          | Aonyx cinerea NC035814 2              | 0,17053869 |
| Mustela sibirica NC020637 6            | Erigonathus barbatus NC008426 1       | 0,17054595 |
| Ursus spelaeus EU327344 13             | Halichoerus grypus NC001602 2         | 0,17055926 |
| Felis silvestris lybica KP202275 4     | Erigonathus barbatus NC008426 1       | 0,17055976 |
| Leopardus jacobita NC028322 1          | Erigonathus barbatus NC008426 1       | 0,1705624  |
| Salanoia concolor D378 1               | Hydrurga leptonyx NC008425 1          | 0,17056561 |
| Lynx pardinus NC028319 161             | Lobodon carcinophaga NC008423 1       | 0,17056973 |
| Phoca fasciata NC008428 1              | Catopuma badia NC028300 1             | 0,17056975 |
| Phoca fasciata NC008428 1              | Leopardus pardalis NC028315 1         | 0,17057054 |
| Lutrogale perspicillata NC035811 1     | Hydrurga leptonyx NC008425 1          | 0,17057069 |
| Ursus arctos AP012576 6                | Monachus schauinslandi NC008421 1     | 0,17059079 |
| Prionailurus bengalensis CKM45 20      | Monachus monachus NC044972 5          | 0,17059472 |
| Phoca largha NC008430 1                | Leopardus colocolo NC028314 1         | 0,17059501 |
| Ommatophoca rossii AY377287etc 1       | Mustela frenata NC020640 1            | 0,17059766 |
| Erigonathus barbatus NC008426 1        | Chrotogale owstoni T607 1             | 0,17060965 |
| Mustela putorius NC020638 4            | Erigonathus barbatus NC008426 1       | 0,17061342 |
| Leptonychotes weddellii NC008424 1     | Galerella sanguinea T378 1            | 0,17062555 |
| Poecilogale albinucha T602 1           | Ailuurs fulgens styani NC009691 1     | 0,17062671 |
| Phoca groenlandica NC008429 54         | Martes pennanti NC020664 16           | 0,17062716 |
| Felis margarita NC028308 1             | Erigonathus barbatus NC008426 1       | 0,17062742 |
| Nandinia binotata NC024567 1           | Martes foina NC020643 1               | 0,17062795 |
| Mirounga angustirostris SRR10331586 1  | Fossa fossana D350 1                  | 0,17062834 |
| Hydrurga leptonyx NC008425 1           | Canis latrans NC008093 7              | 0,17062902 |
| Lobodon carcinophaga NC008423 1        | Canis latrans NC008093 7              | 0,17062947 |
| Mirounga angustirostris SRR10331586 1  | Martes foina NC020643 1               | 0,17063813 |
| Ursus maritimus NC003428 31            | Phoca vitulina NC001325 1             | 0,1706387  |
| Mirounga angustirostris SRR10331586 1  | Leopardus pardalis T262 1             | 0,17063928 |
| Ursus spelaeus NC011112 8              | Pusa sibirica NC008432 2              | 0,17063963 |
| Hydrurga leptonyx NC008425 1           | Cryptoprocta ferox CF13 1             | 0,17064302 |
| Pusa hispida NC 008433 1               | Acinonyx jubatus NC005212 3           | 0,17064554 |
| Genetta abyssinica MG489822 1          | Cystophora cristata NC008427 1        | 0,17067011 |
| Monachus monachus NC044972 5           | Melursus ursinus NC009970 2           | 0,17067714 |
| Viverra tangalunga MH464792 1          | Cystophora cristata NC008427 1        | 0,17068216 |
| Pusa sibirica NC008432 2               | Mustela putorius NC020638 4           | 0,17068224 |
| Mustela altaica NC021751 1             | Ailuurs fulgens NC011124 1            | 0,17068876 |
| Phoca groenlandica NC008429 54         | Martes martes T302 3                  | 0,17069356 |
| Mustela sibirica AP017394 11           | Mirounga angustirostris SRR10331586 1 | 0,17069377 |
| Viverricula indica KX891745 1          | Phoca groenlandica NC008429 54        | 0,17069557 |
| Mirounga angustirostris SRR10331586 1  | Martes pennanti NC020664 16           | 0,17069669 |
| Viverricula indica NC025296 2          | Cystophora cristata NC008427 1        | 0,17069755 |
| Smilodon populator MF871700 1          | Leptonychotes weddellii NC008424 1    | 0,1706987  |
| Paguma larvata PDD05 12                | Hydrurga leptonyx NC008425 1          | 0,17070058 |
| Mirounga angustirostris SRR10331586 1  | Ailuurs fulgens NC011124 1            | 0,17070211 |
| Lynx rufus NC014456 3                  | Lobodon carcinophaga NC008423 1       | 0,17070457 |
| Monachus monachus NC044972 5           | Enhydra lutris NC009692 1             | 0,1707076  |
| Ursus arctos GU573491 207              | Pusa hispida NC 008433 1              | 0,17070794 |
| Mirounga leonina NC008422 1            | Martes flavigula NC012141 3           | 0,17071344 |
| Proteles cristata T393 6               | Paradoxurus jerdoni MH464793 1        | 0,17071378 |
| Pusa caspica NC008431 1                | Leopardus colocolo NC028314 1         | 0,17071679 |
| Ursus thibetanus thibetanus NC011118 4 | Monachus schauinslandi NC008421 1     | 0,17072316 |
| Melogale moschata V0735A 1             | Erigonathus barbatus NC008426 1       | 0,17074725 |
| Phoca groenlandica NC008429 54         | Meles anakuma NC009677 1              | 0,17075516 |
| Phoca groenlandica NC008429 54         | Mustela putorius NC020638 4           | 0,17075835 |
| Pusa caspica NC008431 1                | Mustela nivalis T306 5                | 0,17075838 |
| Lynx rufus NC014456 3                  | Erigonathus barbatus NC008426 1       | 0,17076105 |
| Ursus arctos EU497665 29               | Pusa caspica NC008431 1               | 0,17076166 |
| Ursus maritimus GU573488 Svalbard      | Mirounga leonina NC008422 1           | 0,17076261 |
| Viverricula indica KX891751 1          | Phoca groenlandica NC008429 54        | 0,17076291 |
| Leptonychotes weddellii NC008424 1     | Genetta genetta T297 1                | 0,17076293 |
| Ursus arctos GU573491 207              | Phoca fasciata NC008428 1             | 0,17076688 |
| Lobodon carcinophaga NC008423 1        | Felis nigripes NC028309 1             | 0,17077222 |
| Proteles cristata T393 6               | Paradoxurus hermaphroditus NC039591 1 | 0,17077264 |
| Pusa hispida NC 008433 1               | Leptailurus serval NC028316 1         | 0,1707736  |
| Prionailurus viverrinus NC028305 1     | Lobodon carcinophaga NC008423 1       | 0,17077406 |
| Ursus maritimus GU573488 Svalbard      | Mirounga angustirostris SRR10331586 1 | 0,17077628 |
| Ursus spelaeus NC011112 8              | Pusa hispida NC 008433 1              | 0,17077876 |
| Monachus monachus NC044972 5           | Catopuma badia NC028300 1             | 0,17079307 |
| Mirounga angustirostris SRR10331586 1  | Canis adustus KT448271 1              | 0,17081194 |
| Ursus maritimus GU573488 Svalbard      | Halichoerus grypus NC001602 2         | 0,17081323 |
| Mustela itatsi NC034330 19             | Mirounga leonina NC008422 1           | 0,17081596 |
| Leptonychotes weddellii NC008424 1     | Bassaricyon neblina SRX1097850 1      | 0,17081681 |
| Meles anakuma NC009677 1               | Ailuurs fulgens NC011124 1            | 0,17081791 |
| Salanoia concolor D378 1               | Leptonychotes weddellii NC008424 1    | 0,17082221 |
| Phoca vitulina NC001325 1              | Melogale moschata V0735A 1            | 0,17082785 |
| Viverra zibetha T609 1                 | Erigonathus barbatus NC008426 1       | 0,17082828 |
| Ursus arctos isabellinus 1885 2        | Pusa caspica NC008431 1               | 0,1708288  |
| Mirounga leonina NC008422 1            | Catopuma badia NC028300 1             | 0,17082882 |
| Prionailurus rubiginosus NC028304 2    | Erigonathus barbatus NC008426 1       | 0,17082995 |
| Ursus arctos pruinosus MG066703 3      | Erigonathus barbatus NC008426 1       | 0,17083634 |
| Phoca vitulina NC001325 1              | Mustela nivalis T306 5                | 0,17083767 |
| Lobodon carcinophaga NC008423 1        | Catopuma temminckii NC027115 41       | 0,17083926 |
| Pusa hispida NC 008433 1               | Prionailurus bengalensis NC028301 12  | 0,17084041 |
| Mirounga angustirostris SRR10331586 1  | Melursus ursinus NC009970 2           | 0,17084181 |
| Pusa caspica NC008431 1                | Canis adustus KT448271 1              | 0,17084348 |
| Monachus monachus NC044972 5           | Lutra sumatrana NC035810 1            | 0,17084572 |
| Ursus arctos pruinosus MG066703 3      | Hydrurga leptonyx NC008425 1          | 0,17085215 |
| Ursus arctos AP012576 6                | Phoca largha NC008430 1               | 0,17085594 |
| Monachus monachus NC044972 5           | Caracal caracal NC028306 1            | 0,17085855 |

|                                       |                                      |            |
|---------------------------------------|--------------------------------------|------------|
| Vulpes corsac NC023958 1              | Leopardus jacobita NC028322 1        | 0,18860814 |
| Leopardus colocolo NC028314 1         | Arctocepalus forsteri NC004023 28    | 0,18860941 |
| Urocyon cinereoargenteus NC026723 2   | Martes foina NC020643 1              | 0,18861018 |
| Neophoca cinerea NC008419 1           | Catopuma temminckii NC027115 41      | 0,18861061 |
| Urocyon cinereoargenteus NC026723 2   | Prionailurus bengalensis NC028301 12 | 0,18861125 |
| Lynx rufus NC014456 3                 | Lutrogale perspicillata NC035811 1   | 0,18861248 |
| Viverra tangalunga MH464792 1         | Proteles cristata T393 6             | 0,18861346 |
| Procyon lotor AB462049 4              | Pardofelis marmorata NLN3 2          | 0,18861359 |
| Urocyon littoralis catalinae KP129018 | Prionailurus bengalensis CKM45 20    | 0,18861412 |
| Poecilogale albinucha T602 1          | Pardofelis marmorata NLN3 2          | 0,18861434 |
| Helarctos malayanus NC009968 2        | Eupleres goudotii D128 1             | 0,18861453 |
| Proteles cristata T393 6              | Mustela nigripes NC024942 1          | 0,18861496 |
| Ursus ferrillata NC027935 1           | Panthera tigris amoyensis NC014770 2 | 0,18861543 |
| Panthera tigris NC010642 35           | Martes americana NC020642 1          | 0,18861669 |
| Speothos venaticus C48 2              | Arctotherium sp NC030174 1           | 0,18861905 |
| Ursus arctos isabellinus 1885 2       | Felis chaus NC028307 1               | 0,18861985 |
| Ursus thibetanus thibetanus NC011118  | Mungos mungo/gambianus SRR77048      | 0,18862024 |
| Vulpes zerda K1603240 1               | Ommatophoca rossii AY377287etc 1     | 0,18862042 |
| Poecilogale albinucha T602 1          | Diplogale hosei MH464790 1           | 0,18862069 |
| Paradoxurus hermaphroditus NLNC 1     | Otaria byronia OTAB 1                | 0,18862337 |
| Mungos mungo M1MC 7                   | Mephitis mephitis NC020648 1         | 0,18862306 |
| Mephitis mephitis NC020648 1          | Fossa fossana D350 1                 | 0,18862435 |
| Panthera uncia KP202269 1             | Chrysocyon brachyurus NC024172 1     | 0,18862566 |
| Panthera pardus NC010641 5            | Gulo gulo NC009685 3                 | 0,18862574 |
| Felis catus NC001700 2                | Ailuropoda melanoleuca NC009492 5    | 0,18862584 |
| Odobenus rosmarus NC004029 29         | Martes martes T302 3                 | 0,18862726 |
| Ursus thibetanus thibetanus NC011118  | Galerella sanguinea T378 1           | 0,18862888 |
| Hyena hyena NC020669 1                | Helarctos malayanus NC009968 2       | 0,18862905 |
| Ursus americanus JX196366 3           | Canis lupus chanco NC010340 4        | 0,18862927 |
| Galictis vittata T412 1               | Caracal caracal NC028306 1           | 0,18863231 |
| Neofelis nebulosa NC008450 3          | Meles meles T303 3                   | 0,18863916 |
| Bdeogale nigripes GLC15 1             | Arctocepalus forsteri NC004023 28    | 0,18864068 |
| Ursus arctos pruinosus MG066703 3     | Canis aureus KT448274 1              | 0,18864173 |
| Ursus arctos pruinosus MG066703 3     | Arctocepalus forsteri NC004023 28    | 0,18864469 |
| Canis lupus chanco NC010340 4         | Ailuurs fulgens NC011124 1           | 0,18864714 |
| Panthera leo NERO 19                  | Melogale moschata NC020644 1         | 0,18864816 |
| Zalophus californianus NC008416 1     | Canis aureus KT448274 1              | 0,18864854 |
| Panthera leo NERO 19                  | Mustela altaica NC021751 1           | 0,18864873 |
| Ursus spelaeus EU327344 13            | Odobenus rosmarus NC004029 29        | 0,18865092 |
| Ursus americanus JX196366 3           | Prionailurus planiceps NC028312 6    | 0,18865135 |
| Urocyon littoralis catalinae KP129018 | Ommatophoca rossii AY377287etc 1     | 0,18865314 |
| Ura brachyura KY117547 1              | Tapirus terrestris T358              | 0,18865365 |
| Ura semitorquata MH464789 1           | Conepatus chinga NC042596 1          | 0,18865557 |
| Vulpes corsac NC023958 1              | Enhydra lutris NC009692 1            | 0,18865962 |
| Prionodon linsang ERR2391707 1        | Lutra sumatrana NC035810 1           | 0,18865974 |
| Ura brachyura KY117547 1              | Arctocepalus australis MG023139 1    | 0,18866602 |
| Vulpes vulpes NC008434 5              | Martes zibellina NC011579 39         | 0,18866083 |
| Tremarctos ornatus NC009969 2         | Bdeogale nigripes GLC15 1            | 0,18866181 |
| Paradoxurus hermaphroditus NLNC 1     | Martes melampus NC009678 1           | 0,18866372 |
| Ursus spelaeus NC011112 8             | Panthera leo NERO 19                 | 0,18866581 |
| Nyctereutes procyonoides NC013700 3   | Mustela itatsi NC034330 19           | 0,18866651 |
| Potos flavus T414 1                   | Galidia elegans D146 1               | 0,18866661 |
| Prionodon linsang ERR2391707 1        | Nyctereutes procyonoides NC013700 3  | 0,18866673 |
| Procyon lotor AB462046 3              | Cynictis penicillata T375 1          | 0,18866681 |
| Helarctos malayanus NC009968 2        | Diplogale hosei MH464790 1           | 0,188667   |
| Lutra lutra NC011358 9                | Chrysocyon brachyurus NC024172 1     | 0,18866961 |
| Canis lupus chanco NC010340 4         | Ailuropoda melanoleuca NC009492 5    | 0,18867087 |
| Vulpes ferrillata NC027935 1          | Arctodus simus NC011116 1            | 0,1886715  |
| Mustela eversmannii NC028013 1        | Hyena hyena NC020669 1               | 0,18867272 |
| Viverricula indica KX891745 1         | Phocarcus hookeri NC008418 1         | 0,18867308 |
| Panthera uncia KP202269 1             | Lycalopex sechurae KT448284 1        | 0,18867366 |
| Lutrogale perspicillata NC035811 1    | Genetta servalina NC024568 2         | 0,18867382 |
| Ursus arctos AP012576 6               | Canis lupus chanco NC010340 4        | 0,18867423 |
| Felis chaus NC028307 1                | Arctocepalus australis MG023139 1    | 0,18867442 |
| Felis catus NC001700 2                | Arctocepalus gazella BK010918 1      | 0,18867563 |
| Ursus arctos EU497665 29              | Salanoia concolor D378 1             | 0,18867727 |
| Ursus arctos EU497665 29              | Hyena hyena NC020669 1               | 0,18867861 |
| Lutra sumatrana NC035810 1            | Chrysocyon brachyurus NC024172 1     | 0,18867888 |
| Phocarcus hookeri NC008418 1          | Caracal caracal NC028306 1           | 0,18867891 |
| Ursus thibetanus mupinensis NC00879   | Hyena hyena NC020669 1               | 0,18868062 |
| Poecilogale albinucha T602 1          | Galerella sanguinea T378 1           | 0,18868078 |
| Lutra sumatrana NC035810 1            | Arctictis binturong T605 2           | 0,18868153 |
| Panthera uncia NC010638 1             | Mustela nivalis T306 5               | 0,18868306 |
| Ursus thibetanus formosanus NC009331  | Lutrogale perspicillata NC035811 1   | 0,1886839  |
| Panthera tigris NC010642 35           | Canis latrans NC008093 7             | 0,18868533 |
| Ursus thibetanus thibetanus NC011118  | Xenogale naso C07XAR110 1            | 0,18868683 |
| Panthera leo spelaea KX258452 2       | Callorhinus ursinus NC008415 1       | 0,18868686 |
| Ursus arctos EU497665 29              | Leopardus tigrinus NC028317 1        | 0,18868715 |
| Speothos venaticus C48 2              | Lynx pardinus NC028319 161           | 0,18868746 |
| Ursus arctos pruinosus MG066703 3     | Prionailurus planiceps KY682741 4    | 0,18868746 |
| Profelis aurata NC028299 1            | Otaria byronia OTAB 1                | 0,18868758 |
| Paradoxurus hermaphroditus NLNC 1     | Martes foina NC020643 1              | 0,18868768 |
| Prionailurus planiceps KY682741 4     | Mephitis mephitis NC020648 1         | 0,18869317 |
| Ursus arctos GU573486 5               | Felis margarita NC028308 1           | 0,18869337 |
| Urocyon littoralis catalinae KP129018 | Leopardus colocolo NC028314 1        | 0,18869355 |
| Ursus thibetanus laniger MH281753 2   | Galerella sanguinea T378 1           | 0,18869418 |
| Ursus spelaeus EU327344 13            | Prionailurus planiceps NC028312 6    | 0,18869567 |
| Ursus spelaeus NC011112 8             | Galerella sanguinea T378 1           | 0,18869571 |
| Panthera tigris NC010642 35           | Martes foina NC020643 1              | 0,18869768 |
| Mungos mungo/gambianus SRR77048       | Gulo gulo NC009685 3                 | 0,1886998  |
| Ursus arctos GU573491 207             | Canis aureus KT448274 1              | 0,18870592 |
| Procyon lotor AB462049 4              | Canis lupus chanco NC010340 4        | 0,18871193 |
| Galictis vittata T412 1               | Canis adustus KT448271 1             | 0,18871236 |
| Panthera leo NERO 19                  | Martes martes T302 3                 | 0,18871281 |
| Taxidea taxus NC020646 1              | Cuon alpinus NC013445 3              | 0,18871348 |
| Urocyon cinereoargenteus NC026723 2   | Ommatophoca rossii AY377287etc 1     | 0,18871787 |
| Panthera leo NERO 19                  | Lyaon pictus NC028427 2              | 0,1887196  |
| Helogale parvula SRR7637809 1         | Tapirus terrestris T358              | 0,18872042 |
| Ursus americanus JX196366 3           | Panthera pardus japonensis KJ866876  | 0,1887207  |
| Ursus spelaeus EU327344 13            | Diplogale hosei MH464790 1           | 0,18872184 |
| Potos flavus T414 1                   | Mellivora capensis T370 1            | 0,18872397 |
| Viverra tangalunga MH464792 1         | Suricata suricatta SSM10 1           | 0,18872792 |
| Ursus maritimus GU573488 Svalbard     | Canis lupus chanco NC010340 4        | 0,18872799 |



|                                       |                                       |            |
|---------------------------------------|---------------------------------------|------------|
| Monachus schauinslandi NC008421 1     | Gulo gulo NC009685 3                  | 0,17086326 |
| Ursus maritimus NC003428 31           | Halichoerus grypus NC001602 2         | 0,17088059 |
| Homotherium latidens MF871702 3       | Halichoerus grypus NC001602 2         | 0,17088069 |
| Nandinia binotata NC024567 1          | Meles meles T303 3                    | 0,17088157 |
| Phoca fasciata NC008428 1             | Homotherium latidens MF871702 3       | 0,1708831  |
| Erignathus barbatus NC008426 1        | Ailurus fulgens NC011124 1            | 0,17088662 |
| Phoca groenlandica NC008429 54        | Martes zibellina NC011579 39          | 0,17089137 |
| Mustela altaica NC021751 1            | Mirounga leonina NC008422 1           | 0,17089172 |
| Viverricula indica XK891751 1         | Cystophora cristata NC008427 1        | 0,17089507 |
| Ursus arctos GU573491 207             | Pusa caspica NC008431 1               | 0,17089622 |
| Ursus maritimus NC003428 31           | Mirounga leonina NC008422 1           | 0,17089725 |
| Felis silvestris lybica KP202275 4    | Cystophora cristata NC008427 1        | 0,17089772 |
| Profelis aurata NC028299 1            | Lobodon carcinophaga NC008423 1       | 0,17090631 |
| Lutrogale perspicillata NC035811 1    | Lobodon carcinophaga NC008423 1       | 0,17090714 |
| Pusa hispida NC 008433 1              | Lynx rufus NC014456 3                 | 0,17090805 |
| Monachus schauinslandi NC008421 1     | Martes foina NC020643 1               | 0,17090847 |
| Ursus arctos pruinosus MG066703 3     | Monachus schauinslandi NC008421 1     | 0,17091957 |
| Phoca groenlandica NC008429 54        | Leopardus colocolo NC028314 1         | 0,17092551 |
| Monachus monachus NC0044972 5         | Canis adustus KT448271 1              | 0,17092782 |
| Halichoerus grypus NC001602 2         | Catopuma badia NC028300 1             | 0,17094172 |
| Ursus arctos isabellinus 18B5 2       | Halichoerus grypus NC001602 2         | 0,17094763 |
| Nandinia binotata NC024567 1          | Mustela nigripes NC024942 1           | 0,17095055 |
| Lutrogale perspicillata NC035811 1    | Leptonyx chotes weddellii NC008424 1  | 0,17095841 |
| Pusa caspica NC008431 1               | Neowison wison NC020643 3             | 0,17096062 |
| Felis nigripes NC028309 1             | Cystophora cristata NC008427 1        | 0,17096512 |
| Tremarctos ornatus NC009969 2         | Monachus schauinslandi NC008421 1     | 0,17096646 |
| Phoca vitulina NC001325 1             | Fossa fossana D350 1                  | 0,17096777 |
| Ursus arctos pruinosus MG066703 3     | Pusa sibirica NC008432 2              | 0,17096999 |
| Phoca fasciata NC008428 1             | Lynx canadensis NC028313 1            | 0,17097129 |
| Phoca fasciata NC008428 1             | Lynx rufus NC014456 3                 | 0,17097145 |
| Viverricula indica NC025296 2         | Pusa hispida NC 008433 1              | 0,17097348 |
| Phoca fasciata NC008428 1             | Leptailurus serval NC028316 1         | 0,17097474 |
| Phoca fasciata NC008428 1             | Leopardus jacobita NC028322 1         | 0,17097524 |
| Monachus schauinslandi NC008421 1     | Leopardus geoffroyi NC028320 1        | 0,17097639 |
| Ursus arctos isabellinus 18B5 2       | Mirounga angustirostris SRR10331586 1 | 0,17097829 |
| Phoca largha NC008430 1               | Leopardus pardalis T262 1             | 0,17098194 |
| Pusa sibirica NC008432 2              | Acinonyx jubatus NC005212 3           | 0,17098331 |
| Ursus arctos isabellinus 18B5 2       | Cystophora cristata NC008427 1        | 0,17098533 |
| Hydrurga leptonyx NC008425 1          | Ailuropoda melanoleuca NC009492 5     | 0,17098691 |
| Ommatophoca rossii AY377287etc 1      | Meles meles T303 3                    | 0,17099161 |
| Phoca vitulina NC001325 1             | Canis adustus KT448271 1              | 0,17100458 |
| Phoca fasciata NC008428 1             | Hemigalax derbyanus MH464791 1        | 0,17100567 |
| Monachus monachus NC0044972 5         | Acinonyx jubatus NC005212 3           | 0,17100929 |
| Mirounga leonina NC008422 1           | Lutra sumatrana NC035810 1            | 0,17101167 |
| Leptonyx striatus T299 1              | Halichoerus grypus NC001602 2         | 0,17101382 |
| Pusa sibirica NC008432 2              | Mustela eversmannii NC028013 1        | 0,17101857 |
| Procyon lotor AB462049 4              | Mirounga leonina NC008422 1           | 0,17102417 |
| Phoca groenlandica NC008429 54        | Mustela sibirica AP017394 11          | 0,17102744 |
| Mirounga leonina NC008422 1           | Leopardus jacobita NC028322 1         | 0,17103069 |
| Mirounga angustirostris SRR10331586 1 | Crossarchus platycephalus C7R66 1     | 0,17103164 |
| Lynx pardinus NC028319 161            | Cystophora cristata NC008427 1        | 0,17103194 |
| Lontra canadensis SRR10409165 1       | Hydrurga leptonyx NC008425 1          | 0,17103234 |
| Leopardus guigna NC028321 1           | Erignathus barbatus NC008426 1        | 0,17103417 |
| Pusa hispida NC 008433 1              | Puma yagouaroundi NC028311 1          | 0,17104293 |
| Ursus maritimus NC003428 31           | Mirounga angustirostris SRR10331586 1 | 0,17104562 |
| Phoca vitulina NC001325 1             | Catopuma badia NC028300 1             | 0,17104582 |
| Phoca vitulina NC001325 1             | Leopardus pardalis T262 1             | 0,17104906 |
| Ursus arctos AP012576 6               | Phoca groenlandica NC008429 54        | 0,17105334 |
| Lobodon carcinophaga NC008423 1       | Galictis vittata T412 1               | 0,17105446 |
| Mirounga leonina NC008422 1           | Martes zibellina NC011579 39          | 0,17108446 |
| Mustela nigripes NC024942 1           | Mirounga leonina NC008422 1           | 0,17108511 |
| Pusa caspica NC008431 1               | Martes pennanti NC020664 16           | 0,17109065 |
| Procyon lotor AB462046 3              | Erignathus barbatus NC008426 1        | 0,17109099 |
| Mellivora capensis T370 1             | Galictis vittata T412 1               | 0,17109302 |
| Phoca groenlandica NC008429 54        | Mustela itatsi NC034330 19            | 0,1710957  |
| Martes foina NC020643 1               | Ailurus fulgens styani NC009691 1     | 0,17109627 |
| Lynx lynx NC027083 4                  | Erignathus barbatus NC008426 1        | 0,17109758 |
| Viverra tangalunga MH464792 1         | Phoca vitulina NC001325 1             | 0,17109829 |
| Pusa caspica NC008431 1               | Leptonyx striatus T299 1              | 0,17109963 |
| Leptonyx chotes weddellii NC008424 1  | Cryptoprocta ferox CFC13 1            | 0,17110001 |
| Pusa sibirica NC008432 2              | Leptailurus serval NC028316 1         | 0,17110233 |
| Ursus arctos pruinosus MG066703 3     | Pusa caspica NC008431 1               | 0,17110446 |
| Procyon lotor AB462046 3              | Mirounga angustirostris SRR10331586 1 | 0,17110611 |
| Viverra zibetha T609 1                | Lobodon carcinophaga NC008423 1       | 0,17110677 |
| Phoca largha NC008430 1               | Mustela nivialis T306 5               | 0,17110687 |
| Monachus schauinslandi NC008421 1     | Leopardus jacobita NC028322 1         | 0,17110896 |
| Phoca groenlandica NC008429 54        | Leopardus pardalis T262 1             | 0,17110944 |
| Mirounga angustirostris SRR10331586 1 | Leopardus jacobita NC028322 1         | 0,17111094 |
| Ursus arctos EU497665 29              | Pusa hispida NC 008433 1              | 0,17111227 |
| Ursus arctos AP012576 6               | Phoca fasciata NC008428 1             | 0,17112087 |
| Gulo gulo NC009685 3                  | Ailurus fulgens styani NC009691 1     | 0,17112486 |
| Mirounga angustirostris SRR10331586 1 | Helarctos malayanus NC009968 2        | 0,1711261  |
| Hyena hyaena NC020669 1               | Cynogale bennetti KY117544 1          | 0,17114377 |
| Erignathus barbatus NC008426 1        | Canis adustus KT448271 1              | 0,17114615 |
| Nandinia binotata NC024567 1          | Arctonyx collaris NC020645 1          | 0,17115004 |
| Lobodon carcinophaga NC008423 1       | Chrotogale owstoni T607 1             | 0,17115152 |
| Lobodon carcinophaga NC008423 1       | Conepatus chinga NC042596 1           | 0,17115466 |
| Mungos mungo/gambianus SRR7704821 1   | Cystophora cristata NC008427 1        | 0,17115539 |
| Procyon lotor AB462049 4              | Melogale moschata V0735A 1            | 0,17115748 |
| Leptonyx chotes weddellii NC008424 1  | Galictis fasciata DM333 1             | 0,17115921 |
| Mustela altaica NC021751 1            | Erignathus barbatus NC008426 1        | 0,17116295 |
| Viverricula indica XK891745 1         | Cystophora cristata NC008427 1        | 0,17116439 |
| Pusa caspica NC008431 1               | Mustela altaica NC021751 1            | 0,17116442 |
| Lynx pardinus NC028319 161            | Erignathus barbatus NC008426 1        | 0,17116545 |
| Cystophora cristata NC008427 1        | Catopuma badia NC028300 1             | 0,17116711 |
| Felis chaus NC028307 1                | Cystophora cristata NC008427 1        | 0,17116757 |
| Pusa sibirica NC008432 2              | Prionailurus bengalensis NC028301 12  | 0,17116946 |
| Leopardus guigna NC028321 1           | Cystophora cristata NC008427 1        | 0,1711697  |
| Pusa sibirica NC008432 2              | Prionailurus bengalensis CKM45 20     | 0,17117232 |
| Potos flavus T414 1                   | Galictis vittata T412 1               | 0,17117555 |
| Lynx lynx NC027083 4                  | Lobodon carcinophaga NC008423 1       | 0,17117581 |
| Panthera onca NC022842 1              | Leptonyx chotes weddellii NC008424 1  | 0,17117588 |
| Phoca fasciata NC008428 1             | Leopardus pardalis T262 1             | 0,17117688 |

|                                       |                                       |            |
|---------------------------------------|---------------------------------------|------------|
| Ursus arctos pruinosus MG066703 3     | Canis lupus chanco NC010340 4         | 0,18872802 |
| Ursus semitorquatus MH464789 1        | Ailurus fulgens NC011124 1            | 0,18872909 |
| Atilax paludinosus T606 1             | Ailurus fulgens styani NC009691 1     | 0,18872914 |
| Mungotictis decemlineata NC027828     | Lontra canadensis SRR10409165 1       | 0,18872921 |
| Vulpes ferrillata NC027935 1          | Prionodon linsang ERR2391707 2        | 0,18872939 |
| Vulpes lagopus NC026529 3             | Tremarctos ornatus NC009969 2         | 0,18872954 |
| Nyctereutes procyonoides NC013700 3   | Arctocepalus forsteri KT693377 17     | 0,18873098 |
| Panthera leo spelaea XK258452 2       | Martes flavigula NC012141 3           | 0,188731   |
| Neophoca cinerea NC008419 1           | Cynictis penicillata T375 1           | 0,18873133 |
| Vulpes vulpes NC008434 5              | Mustela itatsi NC034330 19            | 0,18873279 |
| Nyctereutes procyonoides NC013700 3   | Neophoca cinerea NC008419 1           | 0,18873362 |
| Vulpes zerda KJ603240 1               | Mustela kathiah NC023210 1            | 0,18873362 |
| Vulpes erda KJ603240 1                | Viverra tangalunga MH464792 1         | 0,18873437 |
| Mungotictis decemlineata NC027828     | Ailurus fulgens styani NC009691 1     | 0,18873458 |
| Prionodon pardicolor NC024569 2       | Tapirus terrestris T358               | 0,18873656 |
| Hyena hyaena NC020669 1               | Arctonyx collaris NC020645 1          | 0,18873732 |
| Vulpes lagopus NC026529 3             | Martes pennanti NC020664 16           | 0,18873885 |
| Ichneumia albicauda T603 1            | Arctocepalus towmsendii NC008420 1    | 0,18873949 |
| Vulpes ferrillata NC027935 1          | Martes martes T302 3                  | 0,18874024 |
| Urocyon cinereoargenteus NC026723 3   | Martes martes T302 3                  | 0,1887413  |
| Urocyon littoralis catalinae KP129018 | Genetta servalina NC024568 2          | 0,18874149 |
| Phocartos hookeri NC008418 1          | Paradoxurus jerdoni MH464793 1        | 0,1887417  |
| Ursus spelaeus EU327344 13            | Canis lupus chanco NC010340 4         | 0,18874213 |
| Ursus thibetanus mupinensis NC008775  | Ursus javanicus T413 1                | 0,1887427  |
| Ursus arctos pruinosus MG066703 3     | Chrotogale owstoni T607 1             | 0,18874347 |
| Martes americana NC020642 1           | Crocota crocata NC020670 3            | 0,18874402 |
| Ursus arctos isabellinus 18B5 2       | Procyon lotor AB462046 3              | 0,18874651 |
| Galerella sanguinea T378 1            | Chrysoyon brachyurus NC024172 1       | 0,18874703 |
| Procyon lotor AB462046 3              | Panthera pardus japonensis KJ866876   | 0,18874849 |
| Panthera uncia KP202269 1             | Mustela altaica NC021751 1            | 0,188749   |
| Vulpes ferrillata NC027935 1          | Panthera tigris NC010642 35           | 0,18874994 |
| Panthera tigris amoyensis NC014770 2  | Martes americana NC020642 1           | 0,18875124 |
| Panthera leo spelaea XK258452 2       | Ailurus fulgens NC011124 1            | 0,18875241 |
| Ursus thibetanus formosanus NC00933   | Helogale parvula SRR7637809 1         | 0,18875304 |
| Ursus arctos pruinosus MG066703 3     | Lynx rufus NC014456 3                 | 0,18875346 |
| Ursus arctos GU573491 207             | Prionailurus planiceps KY682741 4     | 0,18875438 |
| Ursus maritimus GU573488 Svalbard     | Prionailurus viverrinus NC028305 1    | 0,18875478 |
| Ursus arctos EU497665 29              | Prionailurus viverrinus NC028305 1    | 0,1887548  |
| Ursus arctos pruinosus MG066703 3     | Prionailurus viverrinus NC028305 1    | 0,18875496 |
| Panthera onca KP202264 2              | Lycaon pictus NC028427 2              | 0,18875499 |
| Ursus americanus JX196366 3           | Panthera pardus NC010641 5            | 0,18875921 |
| Diplogale hoesi MH464790 1            | Arctocepalus pusillus NC008417 1      | 0,1887596  |
| Ursus thibetanus formosanus NC00933   | Paradoxurus hermaphroditus NC03959    | 0,18876156 |
| Leopardus colocolo NC028314 1         | Arctocepalus towmsendii NC008420 1    | 0,18876229 |
| Genetta genetta T297 1                | Chrysoyon brachyurus NC024172 1       | 0,18876545 |
| Mephitis mephitis NC020648 1          | Lynx canadensis NC028313 1            | 0,18876524 |
| Pardofelis marmorata NLN3 2           | Galictis vittata T412 1               | 0,1887663  |
| Melursus ursinus NC009970 2           | Felis nigripes NC028309 1             | 0,18876843 |
| Panthera tigris NC010642 35           | Chrysoyon brachyurus NC024172 1       | 0,18876906 |
| Neophoca cinerea NC008419 1           | Ursus javanicus/auropunctata NC006835 | 0,1887707  |
| Melogale moschata V0735A 1            | Canis lupus chanco NC010340 4         | 0,18877119 |
| Panthera leo NERO 19                  | Meles leucurus NC039173 4             | 0,18877283 |
| Lycalopex securae KT448284 1          | Ursus semitorquatus MH464789 1        | 0,18877648 |
| Melogale moschata KP726273 1          | Cuon alpinus NC013445 3               | 0,18877797 |
| Vulpes corsac NC023958 1              | Martes flavigula NC012141 3           | 0,18877886 |
| Panthera pardus NC010641 5            | Mustela eversmannii NC028013 1        | 0,18878274 |
| Panthera pardus NC010641 5            | Mustela itatsi NC034330 19            | 0,18878327 |
| Panthera tigris NC010642 35           | Canis aureus KT448274 1               | 0,18878482 |
| Prionailurus viverrinus NC028305 1    | Arctocepalus forsteri NC040023 28     | 0,18878832 |
| Nyctereutes procyonoides NC013700 3   | Lutra lutra LC050126 1                | 0,18879364 |
| Ursus spelaeus EU327344 13            | Canis mesomelas KT448280 1            | 0,18879424 |
| Ursus arctos EU497665 29              | Canis lupus chanco NC010340 4         | 0,18879567 |
| Vulpes corsac NC023958 1              | Ursus brachyurus KY117547 1           | 0,1887968  |
| Cynictis penicillata T375 1           | Arctocepalus gazella BK010918 1       | 0,18879689 |
| Panthera pardus NC010641 5            | Otocyon megalotis SAF 2               | 0,18879689 |
| Panthera leo NERO 19                  | Chrysoyon brachyurus NC024172 1       | 0,18879752 |
| Felis chaus NC028307 1                | Tapirus terrestris T358               | 0,18879803 |
| Suricata suricatta SSM10 1            | Martes martes T302 3                  | 0,18879901 |
| Paradoxurus hermaphroditus NLNC 1     | Arctocepalus australis MG023139 1     | 0,1887999  |
| Ursus thibetanus formosanus NC00933   | Panthera pardus NC010641 5            | 0,18880238 |
| Panthera uncia NC010638 1             | Meles meles T303 3                    | 0,1888037  |
| Otocyon megalotis SAF 1               | Meles meles T303 3                    | 0,18880434 |
| Poecilogale albinucha T602 1          | Cynictis penicillata T375 1           | 0,18880576 |
| Ursus javanicus/auropunctata NC006835 | Gulo gulo NC009685 3                  | 0,18880753 |
| Poecilogale albinucha T602 1          | Lynx rufus NC027956 2                 | 0,18880786 |
| Panthera leo NERO 19                  | Eumetopias jubatus NC004030 10        | 0,18880834 |
| Viverricula indica XK891751 1         | Urocyon littoralis catalinae KP129018 | 0,18880919 |
| Ursus thibetanus mupinensis NC008775  | Helogale parvula SRR7637809 1         | 0,18880925 |
| Otaria byronia OTAB 1                 | Conepatus chinga NC042596 1           | 0,18881218 |
| Phocartos hookeri NC008418 1          | Felis margarita NC028308 1            | 0,18881302 |
| Panthera uncia KP202269 1             | Arctocepalus pusillus NC008417 1      | 0,18881355 |
| Speothos venaticus C48 2              | Ailurus fulgens styani NC009691 1     | 0,18881401 |
| Tremarctos ornatus NC009969 2         | Paradoxurus hermaphroditus NLNC 1     | 0,18881404 |
| Lutra lutra NC011358 9                | Ailuropoda melanoleuca NC009492 5     | 0,18881443 |
| Odobenus rosmarus NC004029 29         | Lutra lutra NC011358 9                | 0,18881619 |
| Vulpes vulpes NC008434 5              | Panthera tigris NC010642 35           | 0,18881644 |
| Diplogale hoesi MH464790 1            | Ailuropoda melanoleuca NC009492 5     | 0,18881796 |
| Ursus arctos GU573491 207             | Ichneumia albicauda T603 1            | 0,18881945 |
| Vulpes corsac NC023958 1              | Ursus thibetanus laniger MH281753 2   | 0,18881962 |
| Ursus thibetanus formosanus NC00933   | Bdeogale nigripes GLC15 1             | 0,18881984 |
| Ursus maritimus NC003428 31           | Panthera pardus japonensis KJ866876   | 0,1888205  |
| Ursus thibetanus mupinensis NC008775  | Panthera uncia KP202269 1             | 0,18882117 |
| Panthera onca NC022842 1              | Martes zibellina NC011579 39          | 0,18882123 |
| Ursus arctos isabellinus 18B5 2       | Prionailurus planiceps NC028312 6     | 0,18882141 |
| Panthera onca NC022842 1              | Canis anthus NC027956 2               | 0,18882158 |
| Ursus arctos pruinosus MG066703 3     | Leopardus wiedii NC028318 1           | 0,18882164 |
| Ursus spelaeus NC011112 8             | Mungos mungo/gambianus SRR77048       | 0,1888223  |
| Ursus arctos GU573491 207             | Prionailurus rubiginosus NC028304 2   | 0,18882255 |
| Ursus javanicus/auropunctata NC006835 | Tapirus terrestris T358               | 0,18882263 |
| Speothos venaticus C48 2              | Paradoxurus hermaphroditus NC03959    | 0,18882273 |
| Ursus arctos pruinosus MG066703 3     | Leptailurus serval NC028316 1         | 0,18882346 |
| Ursus thibetanus thibetanus NC011113  | Bassaricyon neblina SRX1097850 1      | 0,18882458 |
| Salanoia concolor D378 1              | Galictis vittata T412 1               | 0,18882486 |

|                                       |                                       |            |
|---------------------------------------|---------------------------------------|------------|
| Puma yagouaroundi NC028311 1          | Phoca vitulina NC001325 1             | 0,17118193 |
| Hydrurga leptonyx NC008425 1          | Diplogale hosei MH464790 1            | 0,17121974 |
| Leptonychotes weddellii NC008424 1    | Bdeogale nigripes GLC15 1             | 0,17122273 |
| Mustela sibirica AP017394 11          | Ailurus fulgens styani NC009691 1     | 0,17122418 |
| Mustela sibirica NC020637 6           | Ailurus fulgens styani NC009691 1     | 0,17122422 |
| Phoca groenlandica NC008429 54        | Melogale moschata V0735A 1            | 0,17122778 |
| Phoca fasciata NC008428 1             | Ailurus fulgens NC011124 1            | 0,17123148 |
| Phoca groenlandica NC008429 54        | Ailurus fulgens NC011124 1            | 0,17123172 |
| Ursus spelaeus NC011112 8             | Halichoerus grypus NC001602 2         | 0,17123228 |
| Felis margarita NC028308 1            | Cystophora cristata NC008427 1        | 0,17123471 |
| Leptailurus serval NC028316 1         | Cystophora cristata NC008427 1        | 0,17123571 |
| Hydrurga leptonyx NC008425 1          | Bassaricyon neblina SRX1097850 1      | 0,17123716 |
| Monachus schauinslandi NC008421 1     | Catopuma badia NC028300 1             | 0,17124311 |
| Leptonychotes weddellii NC008424 1    | Galictis vittata T412 1               | 0,17124334 |
| Lobodon carcinophaga NC008423 1       | Felis margarita NC028308 1            | 0,1712434  |
| Monachus schauinslandi NC008421 1     | Leopardus guigna NC028321 1           | 0,17124574 |
| Ursus americanus JX196366 3           | Mirounga leonina NC008422 1           | 0,17126773 |
| Ursus arctos GUS73491 207             | Halichoerus grypus NC001602 2         | 0,17128462 |
| Mustela eversmanni NC028013 1         | Erigonathus barbatus NC008426 1       | 0,17128645 |
| Mirounga leonina NC008422 1           | Canis adustus KT448271 1              | 0,17128816 |
| Mirounga angustirostris SRR10331586 1 | Martes melampus NC009678 1            | 0,17129096 |
| Felis catus NC001700 2                | Erigonathus barbatus NC008426 1       | 0,17130032 |
| Prionailurus viverrinus NC028305 1    | Erigonathus barbatus NC008426 1       | 0,17130332 |
| Pusa sibirica NC008432 2              | Puma yagouaroundi NC028311 1          | 0,17130415 |
| Prionailurus bengalensis NC028301 12  | Phoca fasciata NC008428 1             | 0,17131048 |
| Ursus arctos EU497665 29              | Phoca vitulina NC001325 1             | 0,17131212 |
| Pusa hispida NC 008433 1              | Lynx lynx NC027083 4                  | 0,17131251 |
| Ursus arctos pruinus MG066703 3       | Pusa hispida NC 008433 1              | 0,17132072 |
| Monachus schauinslandi NC008421 1     | Helarctos malayanus NC009968 2        | 0,17132917 |
| Ursus thibetanus laniger MH281753 2   | Monachus schauinslandi NC008421 1     | 0,17133126 |
| Cystophora cristata NC008427 1        | Civettictis civetta NC033378 1        | 0,17133634 |
| Halichoerus grypus NC001602 2         | Fossa fossana D350 1                  | 0,17133974 |
| Leptonychotes weddellii NC008424 1    | Urva semitorquata MH464789 1          | 0,17135739 |
| Leptonychotes weddellii NC008424 1    | Xenogale moschata V0735A 1            | 0,17135739 |
| Mungotictis decemlineata NC027828 1   | Leptonychotes weddellii NC008424 1    | 0,17136064 |
| Prionailurus planiceps NC028312 6     | Mirounga leonina NC008422 1           | 0,17136556 |
| Prionailurus planiceps KY682741 4     | Mirounga leonina NC008422 1           | 0,17136556 |
| Profelis aurata NC028299 1            | Erigonathus barbatus NC008426 1       | 0,17136885 |
| Procyon lotor AB462049 4              | Phoca groenlandica NC008429 54        | 0,17136943 |
| Puma concolor NC016470 22             | Cystophora cristata NC008427 1        | 0,17136967 |
| Monachus monachus NC044972 5          | Civettictis civetta NC033378 1        | 0,17136998 |
| Viverricula indica NC025296 2         | Pusa sibirica NC008432 2              | 0,17137067 |
| Leopardus geoffroyi NC028320 1        | Erigonathus barbatus NC008426 1       | 0,17137078 |
| Phoca groenlandica NC008429 54        | Bassaricyon sumichrasti SRX1099089 1  | 0,17137221 |
| Mustela nivalis T306 5                | Mirounga angustirostris SRR10331586 1 | 0,17137699 |
| Prionailurus bengalensis NC028301 12  | Monachus schauinslandi NC008421 1     | 0,17137699 |
| Phoca vitulina NC001325 1             | Mustela altaica NC021751 1            | 0,17137828 |
| Phoca groenlandica NC008429 54        | Leopardus jacobita NC028322 1         | 0,17137912 |
| Mirounga angustirostris SRR10331586 1 | Leopardus tigrinus NC028317 1         | 0,17137997 |
| Phoca largha NC008430 1               | Lynx lynx NC027083 4                  | 0,17138292 |
| Ursus arctos AP012576 6               | Pusa sibirica NC008432 2              | 0,17138316 |
| Phoca vitulina NC001325 1             | Leopardus wiedii NC028318 1           | 0,17138571 |
| Mirounga angustirostris SRR10331586 1 | Ailuropoda melanoleuca NC009492 5     | 0,17139313 |
| Leptonychotes weddellii NC008424 1    | Canis aureus KT448274 1               | 0,17139329 |
| Ommatophoca rossii AY377287etc 1      | Arctonyx collaris NC020645 1          | 0,17139348 |
| Monachus schauinslandi NC008421 1     | Melursus ursinus NC009970 2           | 0,17139629 |
| Ursus americanus JX196366 3           | Phoca largha NC008430 1               | 0,17140362 |
| Lutra lutra LC050126 1                | Ailurus fulgens styani NC009691 1     | 0,17141116 |
| Nandinia binotata NC024567 1          | Mustela kathia NC023210 1             | 0,17142166 |
| Mirounga angustirostris SRR10331586 1 | Lutra lutra LC050126 1                | 0,17142424 |
| Pusa caspica NC008431 1               | Ailurus fulgens styani NC009691 1     | 0,17142448 |
| Pusa sibirica NC008432 2              | Mustela nivalis T306 5                | 0,17143209 |
| Prionodon linsang ERR2391707 1        | Cryptoprocta ferox FC13 1             | 0,17143415 |
| Monachus schauinslandi NC008421 1     | Martes zibellina NC011579 39          | 0,17143543 |
| Mirounga angustirostris SRR10331586 1 | Martes martes T302 3                  | 0,17143697 |
| Pusa sibirica NC008432 2              | Leopardus pardalis T262 1             | 0,17144014 |
| Parahyaena brunnea NC038159 15        | Leptonychotes weddellii NC008424 1    | 0,17144109 |
| Ursus arctos isabellinus 1885 2       | Phoca vitulina NC001325 1             | 0,17144664 |
| Smilodon populator MF871700 1         | Cystophora cristata NC008427 1        | 0,17144829 |
| Ursus americanus JX196366 3           | Pusa caspica NC008431 1               | 0,17145944 |
| Monachus monachus NC044972 5          | Felis silvestris lybica KP202275 4    | 0,17146617 |
| Lobodon carcinophaga NC008423 1       | Canis lupus familiaris NC002008 1231  | 0,17146689 |
| Puma yagouaroundi NC028311 1          | Monachus monachus NC044972 5          | 0,17146824 |
| Lobodon carcinophaga NC008423 1       | Canis lupus chanco NC010340 4         | 0,17147838 |
| Ursus arctos EU497665 29              | Halichoerus grypus NC001602 2         | 0,17148681 |
| Procyon lotor AB462049 4              | Melogale moschata V0735A 1            | 0,17149407 |
| Phoca fasciata NC008428 1             | Mustela eversmanni NC028013 1         | 0,17149822 |
| Genetta abyssinica MG489822 1         | Erigonathus barbatus NC008426 1       | 0,17150073 |
| Galerella sanguinea T378 1            | Erigonathus barbatus NC008426 1       | 0,17150106 |
| Erigonathus barbatus NC008426 1       | Civettictis civetta GLC19 1           | 0,17150205 |
| Monachus schauinslandi NC008421 1     | Melogale moschata NC020644 1          | 0,17150635 |
| Lobodon carcinophaga NC008423 1       | Diplogale hosei MH464790 1            | 0,17150863 |
| Viverricula indica KX891751 1         | Monachus schauinslandi NC008421 1     | 0,17150927 |
| Mustela nivalis T306 5                | Monachus schauinslandi NC008421 1     | 0,17150974 |
| Lobodon carcinophaga NC008423 1       | Civettictis civetta GLC19 1           | 0,17151263 |
| Proteles cristata T393 6              | Prionodon linsang ERR2391707 1        | 0,17151362 |
| Pusa hispida NC 008433 1              | Leopardus pardalis NC028315 1         | 0,17151596 |
| Phoca vitulina NC001325 1             | Lynx lynx NC027083 4                  | 0,17151743 |
| Cystophora cristata NC008427 1        | Acinonyx jubatus NC005212 3           | 0,17152078 |
| Mephitis mephitis NC020648 1          | Lobodon carcinophaga NC008423 1       | 0,17152224 |
| Mustela kathia NC023210 1             | Monachus monachus NC044972 5          | 0,17152224 |
| Otocolobus manul NC028323 1           | Monachus monachus NC044972 5          | 0,17153329 |
| Viverra tangalunga MH464792 1         | Halichoerus grypus NC001602 2         | 0,17153829 |
| Nandinia binotata NC024567 1          | Meles leucurus NC039173 4             | 0,17154547 |
| Mustela sibirica NC020637 6           | Mirounga leonina NC008422 1           | 0,17155582 |
| Mirounga leonina NC008422 1           | Leopardus tigrinus NC028317 1         | 0,17156915 |
| Mungos mungo/gambianus SRR770482 1    | Lobodon carcinophaga NC008423 1       | 0,17156936 |
| Monachus schauinslandi NC008421 1     | Melogale moschata KP726273 1          | 0,17156954 |
| Mustela nigripes NC024942 1           | Mirounga angustirostris SRR10331586 1 | 0,17156965 |
| Prionailurus planiceps NC028312 6     | Erigonathus barbatus NC008426 1       | 0,17157014 |
| Ursus arctos EU497665 29              | Mirounga leonina NC008422 1           | 0,17157064 |
| Leptonychotes weddellii NC008424 1    | Hyaena hyaena NC020669 1              | 0,17157423 |
| Mungotictis decemlineata NC027828 1   | Hydrurga leptonyx NC008425 1          | 0,17157584 |

|                                       |                                     |            |
|---------------------------------------|-------------------------------------|------------|
| Panthera tigris amoyensis NC014770 2  | Arctodus simus NC011116 1           | 0,18882601 |
| Ursus thibetanus formosanus NC009393  | Hyaena hyaena NC020669 1            | 0,18882611 |
| Phocarcotus hookeri NC008418 1        | Hemigalus derbyanus MH464791 1      | 0,18882741 |
| Ursus thibetanus thibetanus NC011118  | Hyaena hyaena NC020669 1            | 0,18882777 |
| Panthera onca NC022842 1              | Otocyon megalotis SAF1 2            | 0,18882899 |
| Panthera onca NC022842 1              | Martes pennanti NC020664 16         | 0,18883032 |
| Melogale moschata V0735A 1            | Urva javanica/auropunctata NC006835 | 0,18883085 |
| Ursus thibetanus thibetanus NC011118  | Panthera uncia KP202269 1           | 0,18883342 |
| Prionodon linsang ERR2391707 1        | Martes flavigula NC012141 3         | 0,18883559 |
| Melursus ursinus NC009970 2           | Canis aureus KT448274 1             | 0,18883561 |
| Ursus arctos AP012576 6               | Caracal caracal NC028306 1          | 0,18883613 |
| Ursus arctos AP012576 6               | Leptailurus serval NC028316 1       | 0,18883649 |
| Ursus arctos AP012576 6               | Leopardus pardalis T262 1           | 0,18883796 |
| Suricata suricatta SSM10 1            | Eumetopias jubatus NC004030 10      | 0,18884148 |
| Vulpes vulpes NC008434 5              | Gulo gulo NC009685 3                | 0,18884416 |
| Ursus maritimus GUS73488 Svalbard     | Canis aureus KT448274 1             | 0,18884405 |
| Ursus thibetanus thibetanus NC011118  | Chrysocyon brachyurus NC024172 1    | 0,18884639 |
| Leopardus colocolo NC028314 1         | Ailuropoda melanoleuca NC009492 5   | 0,18884706 |
| Panthera pardus NC010641 5            | Mustela sibirica AP017394 11        | 0,18884973 |
| Arctonyx collaris NC020645 1          | Tapirus terrestris T358             | 0,18885063 |
| Ursus americanus JX196366 3           | Felis catus NC001700 2              | 0,18885195 |
| Otocyon megalotis SAF1 2              | Gulo gulo NC009685 3                | 0,18885359 |
| Panthera pardus NC010641 5            | Aonyx cinerea NC035814 2            | 0,18885796 |
| Suricata suricatta SSM10 1            | Lutra sumatrana NC035810 1          | 0,18885852 |
| Mungos mungo MMC7 1                   | Lontra canadensis SRR10409165 1     | 0,18886088 |
| Cynictis penicillata T375 1           | Arctocepalus towsendi NC008420 1    | 0,18886182 |
| Nyctereutes procyonoides NC013700 3   | Eupleres goodii D128 1              | 0,18886249 |
| Ursus maritimus NC003428 31           | Canis lupus chanco NC010340 4       | 0,18886262 |
| Ursus arctos GUS73491 207             | Canis lupus chanco NC010340 4       | 0,18886265 |
| Vulpes corsac NC023958 1              | Prionodon linsang ERR2391707 1      | 0,18886352 |
| Vulpes lagopus NC026529 3             | Meles meles T303 3                  | 0,18886395 |
| Urocyon cinereoargenteus NC026723     | Meles meles T303 3                  | 0,18886603 |
| Viverra tangalunga MH464792 1         | Prionodon linsang ERR2391707 1      | 0,18886672 |
| Nyctereutes procyonoides NC013700 3   | Arctocepalus gazella BKO10918 1     | 0,18886729 |
| Paradoxurus hermaphroditus NLCN 1     | Arctocepalus forsteri KT693377 17   | 0,18886741 |
| Vulpes ferox NC027935 1               | Mustela eversmanni NC028013 1       | 0,18886743 |
| Prionodon linsang ERR2391707 1        | Ailurus fulgens styani NC009691 1   | 0,18886775 |
| Paguma larvata PDD511 2               | Martes zibellina NC011579 39        | 0,18887141 |
| Melursus ursinus NC009970 2           | Canis lupus chanco NC010340 4       | 0,18887499 |
| Mungotictis decemlineata NC027828     | Arctotherium sp NC030174 1          | 0,18887588 |
| Otocyon megalotis SAF1 2              | Mustela itatsi NC034330 19          | 0,18887699 |
| Panthera uncia KP202269 1             | Nyctereutes procyonoides NC013700 3 | 0,18887794 |
| Panthera tigris NC010642 35           | Ailurus fulgens styani NC009691 1   | 0,18887913 |
| Phocarcotus hookeri NC008418 1        | Felis silvestris lybica KP202275 4  | 0,18888007 |
| Panthera onca KP202264 2              | Lutrogale perspicillata NC035811 1  | 0,18888111 |
| Taxidea taxus NC020646 1              | Otocyon megalotis SAF1 2            | 0,18888198 |
| Ursus arctos pruinus MG066703 3       | Crossarchus platycephalus C7R66 1   | 0,18888254 |
| Cynictis penicillata T375 1           | Chrysocyon brachyurus NC024172 1    | 0,18888289 |
| Panthera uncia KP202269 1             | Arctotherium sp NC030174 1          | 0,18888377 |
| Ursus thibetanus mupiniensis NC00875  | Otocyon megalotis SAF1 2            | 0,18888536 |
| Ursus thibetanus laniger MH281753 2   | Mungos mungo/gambianus SRR77048     | 0,18888737 |
| Ursus arctos isabellinus 1885 2       | Leopardus tigrinus NC028317 1       | 0,18888861 |
| Speothos venaticus C48 2              | Lynx canadensis NC028313 1          | 0,18888892 |
| Ursus maritimus GUS73488 Svalbard     | Felis margarita NC028308 1          | 0,18888929 |
| Galidia elegans D146 1                | Canis lupus chanco NC010340 4       | 0,18888941 |
| Speothos venaticus C48 2              | Paradoxurus hermaphroditus NLCN 1   | 0,18888968 |
| Panthera pardus japonensis KJ866876   | Lycaon pictus NC028427 2            | 0,18889083 |
| Paradoxurus hermaphroditus NC03959    | Ictonyx striatus T299 1             | 0,18889213 |
| Mephitis mephitis NC020648 1          | Crossarchus platycephalus C7R66 1   | 0,18889344 |
| Mephitis mephitis NC020648 1          | Leopardus wiedii NC028318 1         | 0,18889403 |
| Speothos venaticus C48 2              | Leopardus geoffroyi NC028320 1      | 0,18889461 |
| Urocyon littoralis catalinae KP129018 | Acinonyx jubatus NC005212 3         | 0,18889584 |
| Ursus arctos AP012576 6               | Procyon lotor AB462046 3            | 0,18889584 |
| Zalophus californianus NC008416 1     | Suricata suricatta SSM10 1          | 0,18889633 |
| Tremarctos ornatus NC009969 2         | Canis aureus KT448274 1             | 0,18889682 |
| Procyon lotor AB462049 4              | Arctictis binturong T605 2          | 0,18889691 |
| Melursus ursinus NC009970 2           | Galerella sanguinea T378 1          | 0,18889701 |
| Ursus thibetanus formosanus NC009393  | Panthera onca KP202264 2            | 0,18889811 |
| Ursus spelaeus EU327344 13            | Parahyaena brunnea NC038159 15      | 0,18889904 |
| Mephitis mephitis NC020648 1          | Catopuma temminckii NC021115 41     | 0,18890235 |
| Ursus arctos AP012576 6               | Ichneumia albicauda T603 1          | 0,18890275 |
| Canis lupus familiaris NC002008 1231  | Arctocepalus pusillus NC008417 1    | 0,18890503 |
| Profelis aurata NC028299 1            | Melursus ursinus NC009970 2         | 0,18890549 |
| Spilogale putorius NC010497 1         | Aonyx cinerea NC035814 2            | 0,18891241 |
| Ursus spelaeus NC011112 8             | Canis aureus KT448274 1             | 0,18891262 |
| Lontra canadensis SRR10409165 1       | Civettictis civetta NC033378 1      | 0,18891419 |
| Salanoia concolor D378 1              | Arctocepalus forsteri NC004023 28   | 0,18891577 |
| Ursus americanus JX196366 3           | Ichneumia albicauda T603 1          | 0,18891607 |
| Martes martes T302 3                  | Cuon alpinus NC013445 3             | 0,18891764 |
| Melogale moschata V0735A 1            | Helogale parula SRR7637809 1        | 0,18892786 |
| Nasua nasua NC020647 1                | Callorhinus ursinus NC008415 1      | 0,18892857 |
| Meles anakuma NC009677 1              | Lycalopex schuereae KT448284 1      | 0,18892921 |
| Suricata suricatta SSM10 1            | Mustela sibirica NC020637 6         | 0,18892923 |
| Vulpes vulpes NC008434 5              | Prionodon linsang ERR2391707 1      | 0,18893056 |
| Nyctereutes procyonoides NC013700 3   | Melogale moschata KP726273 1        | 0,18893223 |
| Neophoca cinerea NC008419 1           | Xenogale naso C07XAR110 1           | 0,18893257 |
| Urva brachyura KY117547 1             | Ailurus fulgens NC011124 1          | 0,18893267 |
| Vulpes zibellina KJ603240 1           | Enhydra lutris NC009692 1           | 0,18893327 |
| Prionodon linsang ERR2391707 1        | Ailurus fulgens NC011124 1          | 0,18893518 |
| Eumetopias jubatus NC004030 10        | Arctictis binturong T605 2          | 0,18893518 |
| Neophoca cinerea NC008419 1           | Mungotictis decemlineata NC027828 1 | 0,18893524 |
| Mungotictis decemlineata NC027828 1   | Canis anthus NC027956 2             | 0,18893582 |
| Mungos mungo MMC7 1                   | Lutrogale perspicillata NC035811 1  | 0,18893607 |
| Panthera tigris amoyensis NC014770 2  | Martes flavigula NC012141 3         | 0,18893759 |
| Canis anthus NC027956 2               | Ailurus fulgens styani NC009691 1   | 0,18893774 |
| Procyon lotor AB462049 4              | Ichneumia albicauda T603 1          | 0,18893822 |
| Galidia elegans D146 1                | Arctocepalus gazella BKO10918 1     | 0,18893826 |
| Lontra canadensis SRR10409165 1       | Ichneumia albicauda T603 1          | 0,18893903 |
| Vulpes vulpes NC008434 5              | Paradoxurus hermaphroditus NC03959  | 0,18893929 |
| Phocarcotus hookeri NC008418 1        | Cryptoprocta ferox FC13 1           | 0,18894219 |
| Prionodon linsang ERR2391707 1        | Mustela nivalis T306 5              | 0,18894312 |
| Otocyon megalotis SAF1 2              | Mustela sibirica NC020637 6         | 0,18894337 |
| Profelis aurata NC028299 1            | Mustela eversmanni NC028013 1       | 0,18894401 |

|                                        |                                       |            |
|----------------------------------------|---------------------------------------|------------|
| Puma hispidia NC 008433 1              | Leopardus pardalis T262 1             | 0,17158325 |
| Puma concolor NC016470 22              | Phoca largha NC008430 1               | 0,1715858  |
| Hydrurga leptonyx NC008425 1           | Galettia vittata T412 1               | 0,17159374 |
| Spilogale putorius NC010497 1          | Meles meles T303 3                    | 0,17160037 |
| Prionailurus rubiginos NC028304 2      | Monachus monachus NC044972 5          | 0,17160112 |
| Panthera leo NERO 19                   | Hydrurga leptonyx NC008425 1          | 0,17161256 |
| Nandinia binotata NC024567 1           | Martes melampus NC009678 1            | 0,17161779 |
| Nandinia binotata NC024567 1           | Enhydra lutris NC009692 1             | 0,17161851 |
| Enhydra lutris NC009692 1              | Bassaricyon neblina SRX1097850 1      | 0,17162319 |
| Cystophora cristata NC008427 1         | Attilax paludinosus T606 1            | 0,17162672 |
| Martes pennanti NC020664 16            | Bassaricyon neblina SRX1097850 1      | 0,17163239 |
| Mustela nivalis T306 5                 | Mirounga leonina NC008422 1           | 0,17163315 |
| Phoca groenlandica NC008429 54         | Mustela eversmannii NC028013 1        | 0,17163327 |
| Smilodon populator MF871700 1          | Mirounga leonina NC008422 1           | 0,17163479 |
| Mustela itatsi NC034330 19             | Mirounga angustirostris SRR10331586 1 | 0,1716371  |
| Ursus arctos GU573491 207              | Mirounga leonina NC008422 1           | 0,17163795 |
| Lontra canadensis SRR10409165 1        | Lobodon carcinophaga NC008423 1       | 0,17163885 |
| Viverricula indica XK891751 1          | Pusa hispida NC 008433 1              | 0,17164221 |
| Mirounga leonina NC008422 1            | Ailuropoda melanoleuca NC009492 5     | 0,17164306 |
| Mustela altaica NC021751 1             | Mirounga angustirostris SRR10331586 1 | 0,17164592 |
| Pusa hispida NC 008433 1               | Lynx canadensis NC028313 1            | 0,17164919 |
| Phoca fasciata NC008428 1              | Leopardus geoffroyi NC028320 1        | 0,17164947 |
| Mirounga angustirostris SRR10331586 1  | Leopardus wiedii NC028318 1           | 0,17164956 |
| Viverricula indica NC025296 2          | Phoca vitulina NC001325 1             | 0,17165196 |
| Phoca groenlandica NC008429 54         | Civettictis civetta NC033378 1        | 0,17167403 |
| Ommatophoca rossii AY377287etc 1       | Enhydra lutris NC009692 1             | 0,17168115 |
| Mirounga leonina NC008422 1            | Lutra lutra LC050126 1                | 0,17168454 |
| Mirounga leonina NC008422 1            | Chrotogale owstoni T607 1             | 0,17168449 |
| Pusa hispida NC 008433 1               | Genetta abyssinica MG489822 1         | 0,17169493 |
| Mustela eversmannii NC028013 1         | Ailurus fulgens styani NC009691 1     | 0,17169522 |
| Mustela kathiah NC023210 1             | Monachus schauinslandi NC008421 1     | 0,17170119 |
| Pusa hispida NC 008433 1               | Ailurus fulgens NC011124 1            | 0,17170221 |
| Galerella sanguinea T378 1             | Cystophora cristata NC008427 1        | 0,17170347 |
| Smilodon populator MF871700 1          | Monachus monachus NC044972 5          | 0,17170554 |
| Pusa hispida NC 008433 1               | Procyon lotor AB462049 4              | 0,17170691 |
| Pusa sibirica NC008432 2               | Leopardus wiedii NC028318 1           | 0,17170957 |
| Ommatophoca rossii AY377287etc 1       | Lutra lutra NC011358 9                | 0,17171127 |
| Mirounga angustirostris SRR10331586 1  | Genetta abyssinica MG489822 1         | 0,17171395 |
| Hydrurga leptonyx NC008425 1           | Galerella sanguinea T378 1            | 0,17171484 |
| Lobodon carcinophaga NC008423 1        | Felis catus NC001700 2                | 0,17171487 |
| Phoca largha NC008430 1                | Mustela altaica NC021751 1            | 0,17171499 |
| Pardofelis marmorata NLN3 2            | Lobodon carcinophaga NC008423 1       | 0,17171526 |
| Viverricula indica NC025296 2          | Canis adustus KT448271 1              | 0,17171957 |
| Ursus arctos AP012576 6                | Pusa hispida NC 008433 1              | 0,17172828 |
| Spilogale putorius NC010497 1          | Mirounga leonina NC008422 1           | 0,17173085 |
| Prionailurus planiceps KY682741 4      | Monachus monachus NC044972 5          | 0,17173605 |
| Monachus monachus NC044972 5           | Civettictis civetta GLC19 1           | 0,17173715 |
| Enhydra lutris NC009692 1              | Ailurus fulgens NC011124 1            | 0,17175046 |
| Lontra canadensis SRR10409165 1        | Leptonyx chotes weddellii NC008424 1  | 0,17175643 |
| Mirounga leonina NC008422 1            | Melogale moschata KP726273 1          | 0,17175735 |
| Lontra canadensis SRR10409165 1        | Cystophora cristata NC008427 1        | 0,17175797 |
| Procyon lotor AB462046 3               | Lutra lutra NC011358 9                | 0,17175826 |
| Mungos mungo/gambianus SRR7704821 1    | Erigonathus barbatus NC008426 1       | 0,17176138 |
| Cystophora cristata NC008427 1         | Ailurus fulgens styani NC009691 1     | 0,17176153 |
| Phoca fasciata NC008428 1              | Mustela itatsi NC034330 19            | 0,17176847 |
| Genetta servalina NC024568 2           | Erigonathus barbatus NC008426 1       | 0,17177141 |
| Prionailurus planiceps KY682741 4      | Erigonathus barbatus NC008426 1       | 0,17177221 |
| Pusa sibirica NC008432 2               | Lynx rufus NC014456 3                 | 0,17177363 |
| Monachus monachus NC044972 5           | Lutra lutra NC011358 9                | 0,17177904 |
| Puma concolor NC016470 22              | Phoca fasciata NC008428 1             | 0,17178142 |
| Phoca fasciata NC008428 1              | Ictonyx striatus T299 1               | 0,17178148 |
| Ursus thibetanus mupinensis NC008753 2 | Monachus schauinslandi NC008421 1     | 0,17178926 |
| Monachus monachus NC044972 5           | Leopardus geoffroyi NC028320 1        | 0,17180777 |
| Martes pennanti NC020664 16            | Halichoerus grypus NC001602 2         | 0,17181578 |
| Urva javanica T413 1                   | Cystophora cristata NC008427 1        | 0,17182872 |
| Ursus arctos prinosus MG066703 3       | Halichoerus grypus NC001602 2         | 0,17182955 |
| Hydrurga leptonyx NC008425 1           | Ursa semitorquata MH464789 1          | 0,17183915 |
| Pusa hispida NC 008433 1               | Procyon lotor AB462046 3              | 0,17184165 |
| Leopardus colocolo NC028314 1          | Halichoerus grypus NC001602 2         | 0,1718428  |
| Leopardus tigrinus NC028317 1          | Cystophora cristata NC008427 1        | 0,17184301 |
| Pusa caspica NC008431 1                | Leopardus pardalis NC028315 1         | 0,17184377 |
| Phoca groenlandica NC008429 54         | Leopardus wiedii NC028318 1           | 0,17185022 |
| Phoca fasciata NC008428 1              | Leopardus wiedii NC028318 1           | 0,17185034 |
| Lobodon carcinophaga NC008423 1        | Ictonyx striatus T299 1               | 0,1718514  |
| Ursus arctos EU497665 29               | Mirounga angustirostris SRR10331586 1 | 0,17185378 |
| Puma concolor NC016470 22              | Phoca vitulina NC001325 1             | 0,17185497 |
| Puma yagouaroundi NC028311 1           | Phoca largha NC008430 1               | 0,17185511 |
| Monachus monachus NC044972 5           | Melogale moschata KP726273 1          | 0,17186134 |
| Martes flavigula NC012141 3            | Bassaricyon neblina SRX1097850 1      | 0,17187954 |
| Ursus arctos prinosus MG066703 3       | Monachus monachus NC044972 5          | 0,17188241 |
| Ursus americanus JX196366 3            | Monachus schauinslandi NC008421 1     | 0,17188862 |
| Nandinia binotata NC024567 1           | Mustela sibirica NC020637 6           | 0,17189272 |
| Mirounga angustirostris SRR10331586 1  | Lutra lutra NC011358 9                | 0,1718947  |
| Mirounga leonina NC008422 1            | Melogale moschata NC020644 1          | 0,17189607 |
| Phoca groenlandica NC008429 54         | Genetta abyssinica MG489822 1         | 0,17189716 |
| Phoca groenlandica NC008429 54         | Enhydra lutris NC009692 1             | 0,17189723 |
| Potos flavus T414 1                    | Lutrogale perspicillata NC035811 1    | 0,17190164 |
| Pusa sibirica NC008432 2               | Lynx lynx NC027083 4                  | 0,17190811 |
| Phoca groenlandica NC008429 54         | Lynx canadensis NC028313 1            | 0,17191947 |
| Mirounga leonina NC008422 1            | Melurus ursinus NC009970 2            | 0,17191975 |
| Phoca vitulina NC001325 1              | Lynx rufus NC014456 3                 | 0,17192142 |
| Ursus arctos prinosus MG066703 3       | Phoca vitulina NC001325 1             | 0,17192455 |
| Ursus americanus JX196366 3            | Pusa hispida NC008432 2               | 0,17193054 |
| Phoca fasciata NC008428 1              | Acinonyx jubatus NC005212 3           | 0,1719325  |
| Gulo gulo NC009685 3                   | Ailurus fulgens NC011124 1            | 0,17193376 |
| Ursus americanus JX196366 3            | Pusa hispida NC 008433 1              | 0,1719455  |
| Pusa sibirica NC008432 2               | Canis adustus KT448271 1              | 0,17194992 |
| Mustela nivalis T306 5                 | Halichoerus grypus NC001602 2         | 0,1719518  |
| Smilodon populator MF871700 1          | Erigonathus barbatus NC008426 1       | 0,1719549  |
| Lontra canadensis SRR10409165 1        | Bassaricyon sumichrasti SRX1099089 1  | 0,17195672 |
| Leptonyx chotes weddellii NC008424 1   | Urva javanica T413 1                  | 0,17196338 |
| Mirounga leonina NC008422 1            | Lynx pardinus NC028319 161            | 0,17197107 |
| Mirounga leonina NC008422 1            | Leopardus pardalis NC028315 1         | 0,17197275 |

|                                       |                                      |            |
|---------------------------------------|--------------------------------------|------------|
| Cryptoprocta ferox FC13 1             | Arctocepalus australis MG023139 1    | 0,18894477 |
| Cryptoprocta ferox FC13 1             | Arctocepalus forsteri KT693377 17    | 0,18894508 |
| Panthera onca NC010638 1              | Canis latrans NC008093 7             | 0,18894546 |
| Urocyon cinereoargenteus NC026723 2   | Lynx rufus NC014456 3                | 0,18894577 |
| Urocyon cinereoargenteus NC026723 2   | Leopardus pardalis NC028315 1        | 0,18894601 |
| Ursus arctos isabellinus 1885 2       | Salanoia concolor D378 1             | 0,18894659 |
| Urocyon littoralis catalinae KP129018 | Martes foina NC020643 1              | 0,18894686 |
| Ursus arctos prinosus MG066703 3      | Procyon lotor AB462049 4             | 0,18894823 |
| Speothos venaticus C48 2              | Ailurus fulgens NC011124 1           | 0,18894847 |
| Lyaon pictus NC028427 2               | Arctocepalus pusillus NC008417 1     | 0,18894865 |
| Ictonyx striatus T299 1               | Galidia elegans D146 1               | 0,18895046 |
| Odobenus rosmarus NC004029 29         | Enhydra lutris NC009692 1            | 0,18895057 |
| Urva semitorquata MH464789 1          | Helarctos malayanus NC009968 2       | 0,18895307 |
| Otocyon megalotis SAF1 2              | Martes pennanti NC020664 16          | 0,18895325 |
| Panthera leo spelaea KX258452 2       | Mustela putorius NC020638 4          | 0,18895401 |
| Ursus thibetanus laniger MH281753 2   | Civettictis penicillata T375 1       | 0,18895516 |
| Mustela altaica NC021751 1            | Cryptoprocta ferox FC13 1            | 0,18895531 |
| Ursus arctos isabellinus 1885 2       | Felis silvestris lycica KP202275 4   | 0,18895586 |
| Ursus spelaeus NC011112 8             | Galidia elegans D146 1               | 0,18895893 |
| Ursus spelaeus NC011112 8             | Galidictis fasciata DM333 1          | 0,18895999 |
| Ursus spelaeus EU327344 13            | Hyena hyena NC020669 1               | 0,18896191 |
| Leopardus jacobita NC028322 1         | Ailuropoda melanoleuca NC009492 5    | 0,18896198 |
| Panthera leo spelaea KX258452 2       | Bassaricyon sumichrasti SRX1099089 1 | 0,1889635  |
| Chrotogale owstoni T607 1             | Canis mesomelas KT448280 1           | 0,18896522 |
| Suricata suricatta SSM10 1            | Gulo gulo NC009685 3                 | 0,18896972 |
| Parahyaena brunnea NC038159 15        | Galictis vittata T412 1              | 0,18897055 |
| Panthera leo NERO 19                  | Martes melampus NC009678 1           | 0,18897325 |
| Ursus spelaeus EU327344 13            | Lyaon pictus NC028427 2              | 0,18897355 |
| Mephitis mephitis NC020648 1          | Galictis vittata T412 1              | 0,18897374 |
| Vulpes lagopus NC026529 3             | Neofelis nebulosa NC008450 3         | 0,1889779  |
| Potos flavus T414 1                   | Neofelis nebulosa NC008450 3         | 0,1889782  |
| Genetta genetta T297 1                | Arctocepalus forsteri NC004023 28    | 0,18898416 |
| Felis catus NC001700 2                | Arctocepalus forsteri NC004023 28    | 0,18898675 |
| Panthera tigris NC010642 35           | Canis lupus familiaris NC002008 1231 | 0,18898916 |
| Procyon lotor AB462046 3              | Panthera pardus NC010641 5           | 0,18899135 |
| Mungos mungo/gambianus SRR7704821 1   | Conepatus chinga NC042596 1          | 0,18899441 |
| Ursus spelaeus NC011112 8             | Canis mesomelas KT448280 1           | 0,1889977  |
| Helogale parvula SRR7637809 1         | Arctocepalus forsteri KT693377 17    | 0,18899779 |
| Vulpes corsac NC023958 1              | Martes americana NC020642 1          | 0,188998   |
| Phocarcos hookeri NC008418 1          | Bdeogale nigripes GLC15 1            | 0,18899927 |
| Prionodon linsang ERR2391707 1        | Mustela putorius NC020638 4          | 0,18900053 |
| Ursus arctos isabellinus 1885 2       | Conepatus chinga NC042596 1          | 0,1890012  |
| Vulpes lagopus NC026529 3             | Galidia elegans D146 1               | 0,18900131 |
| Mungotictis decemlineata NC027828 1   | Arctocepalus australis MG023139 1    | 0,1890028  |
| Salanoia concolor D378 1              | Ailurus fulgens NC011124 1           | 0,18900368 |
| Paradoxurus hermaphroditus NLNC 1     | Martes americana NC020642 1          | 0,18900567 |
| Urva brachyura KY117547 1             | Arctotherium sp NC030174 1           | 0,18900567 |
| Vulpes vulpes NC008434 5              | Diplogale hoesi MH464790 1           | 0,18900734 |
| Otocyon megalotis SAF1 2              | Lutra lutra LC050126 1               | 0,18900776 |
| Diplogale hoesi MH464790 1            | Canis anthus NC027956 2              | 0,18900843 |
| Felis catus NC001700 2                | Arctocepalus townsendi NC008420 1    | 0,18901062 |
| Urocyon littoralis catalinae KP129018 | Martes martes T302 3                 | 0,18901066 |
| Lutra lutra NC011358 9                | Crocota crocata NC020670 3           | 0,18901105 |
| Profelis aurata NC028299 1            | Arctocepalus forsteri KT693377 17    | 0,18901131 |
| Ichneumia albicauda T603 1            | Ailurus fulgens styani NC009691 1    | 0,18901508 |
| Speothos venaticus C48 2              | Mustela sibirica NC020637 6          | 0,18901512 |
| Otaria byronia OTAB 1                 | Hyena hyena NC020669 1               | 0,18901607 |
| Panthera onca NC022842 1              | Ailurus fulgens styani NC009691 1    | 0,18901664 |
| Zalophus wollebaeki SRR4431565 1      | Suricata suricatta SSM10 1           | 0,18901673 |
| Procyon lotor AB462049 4              | Lyaon pictus NC028427 2              | 0,18901876 |
| Mustela altaica NC021751 1            | Hyena hyena NC020669 1               | 0,18901999 |
| Vulpes ferrilata NC027935 1           | Panthera onca NC022842 1             | 0,18902166 |
| Panthera onca NC022842 1              | Arctocepalus townsendi NC008420 1    | 0,18902245 |
| Ursus arctos GU573491 207             | Felis margarita NC028308 1           | 0,18902381 |
| Ursus thibetanus thibetanus NC011112  | Urva javanica T413 1                 | 0,18902381 |
| Ursus maritimus NC003428 31           | Felis margarita NC028308 1           | 0,18902396 |
| Panthera onca NC022842 1              | Neophoca cinerea NC008419 1          | 0,18902591 |
| Ursus arctos AP012576 6               | Crossarchus platycephalus C7866 1    | 0,1890278  |
| Ursus arctos GU573486 5               | Panthera onca KP202264 2             | 0,18902843 |
| Leopardus tigrinus NC028317 1         | Ailuropoda melanoleuca NC009492 5    | 0,18902922 |
| Lynx pardinus NC028319 161            | Ailuropoda melanoleuca NC009492 5    | 0,18902925 |
| Ursus arctos AP012576 6               | Salanoia concolor D378 1             | 0,18903084 |
| Helarctos malayanus NC009968 2        | Galerella sanguinea T378 1           | 0,18903251 |
| Ursus arctos prinosus MG066703 3      | Ictonyx striatus T299 1              | 0,18903424 |
| Pardofelis marmorata NLN3 2           | Helarctos malayanus NC009968 2       | 0,18903606 |
| Urva javanica/auropunctata NC006835   | Arctocepalus australis MG023139 1    | 0,18903716 |
| Canis mesomelas KT448280 1            | Arctodus simus NC011116 1            | 0,1890378  |
| Panthera tigris amoyensis NC014770 2  | Chrysocyon brachyurus NC024172 1     | 0,18903863 |
| Ursus arctos AP012576 6               | Leopardus jacobita NC028322 1        | 0,18904032 |
| Neofelis nebulosa NC008450 3          | Lutra lutra LC050126 1               | 0,18904102 |
| Panthera leo NERO 19                  | Melogale moschata KP726273 1         | 0,18904397 |
| Panthera leo NERO 19                  | Melogale moschata V0735A 1           | 0,18904415 |
| Xenogale naso C07XAR110 1             | Eumetopias jubatus NC004030 10       | 0,18904598 |
| Canis aureus KT448274 1               | Arctocepalus pusillus NC008417 1     | 0,189046   |
| Neofelis nebulosa NC008450 3          | Mustela nigripes NC024942 1          | 0,18904778 |
| Cuon alpinus NC013445 3               | Ailurus fulgens NC011124 1           | 0,1890485  |
| Panthera leo NERO 19                  | Lycalopex schuareae KT448284 1       | 0,18904942 |
| Ursus maritimus GU573488 Svalbard     | Canis lupus familiaris NC002008 1231 | 0,18905056 |
| Ursus arctos GU573486 5               | Canis aureus KT448274 1              | 0,18905251 |
| Ictonyx striatus T299 1               | Urva javanica/auropunctata NC006835  | 0,18905333 |
| Lycalopex schuareae KT448284 1        | Lutra lutra NC011358 9               | 0,18905856 |
| Melogale moschata V0735A 1            | Diplogale hoesi MH464790 1           | 0,18906006 |
| Otocyon megalotis SAF1 2              | Eumetopias jubatus NC004030 10       | 0,18906021 |
| Suricata suricatta SSM10 1            | Martes zibellina NC011579 39         | 0,18906328 |
| Ursus spelaeus EU327344 13            | Canis lupus familiaris NC002008 1231 | 0,18906431 |
| Helogale parvula SRR7637809 1         | Ailurus fulgens styani NC009691 1    | 0,18906608 |
| Urocyon littoralis catalinae KP129018 | Martes zibellina NC011579 39         | 0,18906666 |
| Tremarctos ornatus NC009969 2         | Urva javanica T413 1                 | 0,18906884 |
| Suricata suricatta SSM10 1            | Aonyx cinerea NC035814 1             | 0,18906927 |
| Galidictis fasciata DM333 1           | Arctocepalus gazella BK101918 1      | 0,18907236 |
| Vulpes ferrilata NC027935 1           | Taxidea taxus NC020646 1             | 0,18907367 |
| Ursus spelaeus NC011112 8             | Panthera pardus NC010641 5           | 0,18907368 |
| Lontra canadensis SRR10409165 1       | Civettictis civetta GLC19 1          | 0,18907379 |

|                                       |                                       |            |
|---------------------------------------|---------------------------------------|------------|
| Monachus schauinslandi NC008421 1     | Martes americana NC020642 1           | 0,17197381 |
| Hydrurga leptonyx NC008425 1          | Urva javanica T413 1                  | 0,17197397 |
| Lyaon pictus NC028427 2               | Leptonyctotes weddellii NC008424 1    | 0,17197496 |
| Prionailurus planiceps KY682741 4     | Cystophora cristata NC008427 1        | 0,17197548 |
| Leopardus tigrinus NC028317 1         | Erigonathus barbatus NC008426 1       | 0,17197631 |
| Ursus arctos GUS73491 207             | Phoca vitulina NC001325 1             | 0,17198554 |
| Pusa hispida NC 008433 1              | Puma concolor NC016470 22             | 0,17198583 |
| Ursus arctos AP012576 6               | Pusa caspica NC008431 1               | 0,1719892  |
| Prionailurus bengalensis NC028301 12  | Phoca largha NC008430 1               | 0,17199041 |
| Hemigalus derbyanus MH464791 1        | Cystophora cristata NC008427 1        | 0,17199694 |
| Potos flavus T414 1                   | Ailurus fulgens NC011124 1            | 0,17203067 |
| Monachus schauinslandi NC008421 1     | Conepatus chinga NC042596 1           | 0,17203121 |
| Mustela itatsi NC034330 19            | Ailurus fulgens NC011124 1            | 0,17203316 |
| Mirounga leonina NC008422 1           | Caracal caracal NC028306 1            | 0,17203993 |
| Otocolobus manul NC028323 1           | Mirounga leonina NC008422 1           | 0,17203993 |
| Procyon lotor AB462046 4              | Phoca groenlandica NC008429 54        | 0,17204329 |
| Halichoerus grypus NC001602 2         | Acinonyx jubatus NC005212 3           | 0,17204334 |
| Puma yagouaroundi NC028311 1          | Cystophora cristata NC008427 1        | 0,17204352 |
| Ursus americanus JX196366 3           | Halichoerus grypus NC001602 2         | 0,17205308 |
| Pusa hispida NC 008433 1              | Leopardus wiedii NC028318 1           | 0,17205518 |
| Phoca largha NC008430 1               | Lynx rufus NC014456 3                 | 0,17205624 |
| Prionailurus bengalensis NC028301 12  | Phoca vitulina NC001325 1             | 0,17205758 |
| Monachus schauinslandi NC008421 1     | Acinonyx jubatus NC005212 3           | 0,17206375 |
| Monachus monachus NC0044972 5         | Martes pennanti NC020664 16           | 0,17206737 |
| Erigonathus barbatus NC008426 1       | Civettictis civetta NC033378 1        | 0,17207736 |
| Phoca groenlandica NC008429 54        | Hemigalus derbyanus MH464791 1        | 0,17207789 |
| Viverra tanguilunga MH464792 1        | Phoca groenlandica NC008429 54        | 0,17210525 |
| Monachus schauinslandi NC008421 1     | Fossa fossana D350 1                  | 0,17210841 |
| Leptonyctotes weddellii NC008424 1    | Ichneumia albicauda T603 1            | 0,17210972 |
| Prionailurus planiceps NC028312 6     | Cystophora cristata NC008427 1        | 0,17211011 |
| Homotherium latidens MF871702 3       | Ailurus fulgens styani NC009691 1     | 0,1721154  |
| Procyon lotor AB462049 4              | Mirounga angustirostris SRR10331586 1 | 0,17211552 |
| Phoca fasciata NC008428 1             | Lynx lynx NC027083 4                  | 0,17211592 |
| Monachus schauinslandi NC008421 1     | Felis chaus NC028307 1                | 0,17211872 |
| Poecilogale albinucha T602 1          | Lobodon carcinophaga NC008423 1       | 0,17211938 |
| Phoca groenlandica NC008429 54        | Catopuma badia NC028300 1             | 0,17211948 |
| Martes flavigula NC012141 3           | Ailurus fulgens styani NC009691 1     | 0,17212659 |
| Mirounga angustirostris SRR10331586 1 | Martes flavigula NC012141 3           | 0,17214402 |
| Ursus americanus JX196366 3           | Mirounga angustirostris SRR10331586 1 | 0,17214437 |
| Spilogale putorius NC010497 1         | Lobodon carcinophaga NC008423 1       | 0,17215125 |
| Ommatophoca rossii AY377287etc 1      | Lutra lutra LC050126 1                | 0,17215893 |
| Puma yagouaroundi NC028311 1          | Mirounga leonina NC008422 1           | 0,17217447 |
| Phoca fasciata NC008428 1             | Martes pennanti NC020664 16           | 0,17217529 |
| Prionailurus viverrinus NC028305 1    | Mirounga leonina NC008422 1           | 0,17217572 |
| Pusa caspica NC008431 1               | Catopuma badia NC028300 1             | 0,17217775 |
| Viverricula indica NC025296 2         | Pusa caspica NC008431 1               | 0,17217873 |
| Viverricula indica KX891745 1         | Pusa hispida NC 008433 1              | 0,17218097 |
| Salanoia concolor D378 1              | Lobodon carcinophaga NC008423 1       | 0,17218201 |
| Mephitis mephitis NC020648 1          | Leptonyctotes weddellii NC008424 1    | 0,17218542 |
| Prionailurus bengalensis NC028301 12  | Phoca groenlandica NC008429 54        | 0,17218663 |
| Monachus schauinslandi NC008421 1     | Ichneumia albicauda T603 1            | 0,17218861 |
| Mirounga angustirostris SRR10331586 1 | Catopuma badia NC028300 1             | 0,17218886 |
| Prionailurus bengalensis CKM45 20     | Phoca fasciata NC008428 1             | 0,17218921 |
| Ursus arctos GUS73491 207             | Mirounga angustirostris SRR10331586 1 | 0,17219104 |
| Phoca vitulina NC001325 1             | Leptailurus serval NC028316 1         | 0,17219208 |
| Phoca largha NC008430 1               | Leopardus jacobita NC028322 1         | 0,17219427 |
| Mustela erminea T305 2                | Eumetopias jubatus NC004030 10        | 0,17220147 |
| Monachus monachus NC0044972 5         | Felis nigripes NC028309 1             | 0,17220475 |
| Smilodon populator MF871700 1         | Lobodon carcinophaga NC008423 1       | 0,17221698 |
| Mustela putorius NC020638 4           | Mirounga leonina NC008422 1           | 0,17222936 |
| Nandinia binotata NC024567 1          | Mustela putorius NC020638 4           | 0,17222936 |
| Leptonyctotes weddellii NC008424 1    | Helogale parvula SRR7637809 1         | 0,17223227 |
| Leptonyctotes weddellii NC008424 1    | Urva brachyura KY117547 1             | 0,17223227 |
| Taxidea taxus NC020646 1              | Callorhinus ursinus NC008415 1        | 0,172233   |
| Mustela nigripes NC024942 1           | Ailurus fulgens NC011124 1            | 0,17223468 |
| Mustela sibirica NC020637 6           | Mirounga angustirostris SRR10331586 1 | 0,17224261 |
| Mirounga leonina NC008422 1           | Genetta servalina NC024568 2          | 0,17224288 |
| Phoca largha NC008430 1               | Ailurus fulgens styani NC009691 1     | 0,17224391 |
| Phoca fasciata NC008428 1             | Civettictis civetta GLC19 1           | 0,17224443 |
| Otocolobus manul NC028323 1           | Erigonathus barbatus NC008426 1       | 0,17224437 |
| Mirounga angustirostris SRR10331586 1 | Lynx pardinus NC028319 161            | 0,17225289 |
| Prionailurus bengalensis CKM45 20     | Phoca vitulina NC001325 1             | 0,17226268 |
| Leptonyctotes weddellii NC008424 1    | Canis lupus familiaris NC002008 1231  | 0,17226371 |
| Prionailurus planiceps NC028312 6     | Monachus monachus NC0044972 5         | 0,17227469 |
| Monachus monachus NC0044972 5         | Lynx pardinus NC028319 161            | 0,17227896 |
| Lynx rufus NC014456 3                 | Halichoerus grypus NC001602 2         | 0,17229514 |
| Pusa sibirica NC008432 2              | Bassaricyon neblina SRX1097850 1      | 0,17229858 |
| Procyon lotor AB462049 4              | Erigonathus barbatus NC008426 1       | 0,17230234 |
| Procyon lotor AB462049 4              | Cystophora cristata NC008427 1        | 0,17230324 |
| Nandinia binotata NC024567 1          | Bassaricyon sumichrasti SRX1099089 1  | 0,17230503 |
| Ursus arctos AP012576 6               | Halichoerus grypus NC001602 2         | 0,17231046 |
| Lobodon carcinophaga NC008423 1       | Canis mesomelas KT448280 1            | 0,17231105 |
| Cystophora cristata NC008427 1        | Catopuma temminckii NC027115 41       | 0,17231113 |
| Phoca vitulina NC001325 1             | Ailurus fulgens styani NC009691 1     | 0,17231143 |
| Pardofelis marmorata NLN3 2           | Cystophora cristata NC008427 1        | 0,17231154 |
| Phoca groenlandica NC008429 54        | Civettictis civetta GLC19 1           | 0,17231163 |
| Pusa caspica NC008431 1               | Lynx lynx NC027083 4                  | 0,17231205 |
| Lobodon carcinophaga NC008423 1       | Felis chaus NC028307 1                | 0,1723211  |
| Phoca groenlandica NC008429 54        | Leopardus pardalis NC028315 1         | 0,17232123 |
| Poecilogale albinucha T602 1          | Phoca fasciata NC008428 1             | 0,17232355 |
| Phoca vitulina NC001325 1             | Leopardus jacobita NC028322 1         | 0,17232879 |
| Mustela sibirica AP017394 11          | Monachus monachus NC0044972 5         | 0,17233054 |
| Leptonyctotes weddellii NC008424 1    | Urva javanica/auropunctata NC006835 1 | 0,17233807 |
| Phoca vitulina NC001325 1             | Acinonyx jubatus NC005212 3           | 0,17234264 |
| Phoca largha NC008430 1               | Acinonyx jubatus NC005212 3           | 0,17234294 |
| Ommatophoca rossii AY377287etc 1      | Martes flavigula NC012141 3           | 0,17234489 |
| Monachus monachus NC0044972 5         | Lynx canadensis NC028313 1            | 0,17234689 |
| Viverricula indica NC025296 2         | Halichoerus grypus NC001602 2         | 0,17235996 |
| Nandinia binotata NC024567 1          | Mustela sibirica AP017394 11          | 0,17236388 |
| Mustela putorius NC020638 4           | Ailurus fulgens NC011124 1            | 0,17236994 |
| Salanoia concolor D378 1              | Pusa sibirica NC008432 2              | 0,17236994 |
| Ichneumia albicauda T603 1            | Cystophora cristata NC008427 1        | 0,17237845 |
| Pusa sibirica NC008432 2              | Puma concolor NC016470 22             | 0,17238091 |

|                                       |                                      |            |
|---------------------------------------|--------------------------------------|------------|
| Paradoxurus jerdoni MH464793 1        | Martes zibellina NC011579 39         | 0,18907383 |
| Galerella sanguinea T378 1            | Canis mesomelas KT448280 1           | 0,18907605 |
| Cynogale bennetti KY117544 1          | Ailuropoda melanoleuca NC009492 5    | 0,18907702 |
| Urocyon cinereoargenteus NC026723 2   | Genetta servalina NC024568 2         | 0,18907817 |
| Paguma larvata PDD511 2               | Neophoca cinerea NC008419 1          | 0,18907897 |
| Gufes aurata NC028299 1               | Arctocepalus gazella BK010918 1      | 0,18907963 |
| Pardofelis marmorata NLN3 2           | Arctocepalus gazella BK010918 1      | 0,18907991 |
| Phocarcotus hookeri NC008418 1        | Genetta genetta T297 1               | 0,18908001 |
| Viverricula indica KX891751 1         | Aonyx cinerea NC035814 2             | 0,18908028 |
| Ichneumia albicauda T603 1            | Urva brachyura KY117547 1            | 0,18908055 |
| Urocyon littoralis catalinae KP129018 | Leopardus pardalis NC028315 1        | 0,18908087 |
| Lynx canadensis NC028313 1            | Bassaricyon neblina SRX1097850 1     | 0,1890824  |
| Urocyon littoralis catalinae KP129018 | Prionailurus bengalensis NC028301 12 | 0,18908262 |
| Neophoca cinerea NC008419 1           | Felis chaus NC028307 1               | 0,18908341 |
| Lutrogale perspicillata NC035811 1    | Felis nigripes NC028309 1            | 0,1890849  |
| Urva javanica/auropunctata NC006835   | Arctocepalus forsteri NC004023 28    | 0,18908571 |
| Meles anakuma NC009677 1              | Chrysocyon brachyurus NC024172 1     | 0,18908654 |
| Pardofelis marmorata NLN3 2           | Otaria byronia OTAB 1                | 0,18908678 |
| Martes martes T302 3                  | Crocota crocata NC020670 3           | 0,18908796 |
| Ursus arctos GUS73491 207             | Lynx rufus NC014456 3                | 0,18908989 |
| Melursus ursinus NC009970 2           | Helogale parvula SRR7637809 1        | 0,18908997 |
| Ursus arctos pruinus MG066703 3       | Lynx pardinus NC028319 161           | 0,18909067 |
| Speothos venaticus C48 2              | Leopardus jacobita NC028322 1        | 0,1890915  |
| Ursus spelaeus EU327344 13            | Mungos mungo/gambianus SRR77048      | 0,18909161 |
| Ursus maritimus GUS73488 Svalbard     | Felis chaus NC028307 1               | 0,18909176 |
| Ursus thibetanus laniger MH281753 2   | Urva javanica T413 1                 | 0,18909316 |
| Ursus arctos pruinus MG066703 3       | Genetta genetta T297 1               | 0,18909419 |
| Ichneumia albicauda T603 1            | Galidictis vittata T412 1            | 0,18909611 |
| Urocyon littoralis catalinae KP129018 | Smilodon populator MF871700 1        | 0,18909799 |
| Puma concolor NC016470 22             | Ailuropoda melanoleuca NC009492 5    | 0,18909819 |
| Lyaon pictus NC028427 2               | Ichneumia albicauda T603 1           | 0,18909869 |
| Urocyon spelaeus NC011112 8           | Paradoxurus hermaphroditus NC03959   | 0,18910088 |
| Prionodon pardicolor NC024569 2       | Ailuropoda melanoleuca NC009492 5    | 0,18910089 |
| Ursus arctos GUS73486 5               | Leopardus guigna NC028321 1          | 0,18910162 |
| Ursus arctos EU497665 29              | Diplogale hoesi MH464790 1           | 0,18910892 |
| Conepatus chinga NC042596 1           | Arctocepalus forsteri NC004023 28    | 0,18910989 |
| Ursus arctos AP012576 6               | Prionailurus bengalensis CKM45 20    | 0,18911131 |
| Urva javanica T413 1                  | Eumetopias jubatus NC004030 10       | 0,18911299 |
| Ursus thibetanus formosanus NC0093    | Diplogale hoesi MH464790 1           | 0,18911406 |
| Ursus americanus JX196366 3           | Galerella sanguinea T378 1           | 0,18911654 |
| Ursus arctos pruinus MG066703 3       | Canis lupus familiaris NC002008 1231 | 0,18911804 |
| Urocyon cinereoargenteus NC026723 2   | Smilodon populator MF871700 1        | 0,18912047 |
| Ursus arctos EU497665 29              | Panthera pardus NC010641 5           | 0,18912829 |
| Ursus arctos EU497665 29              | Panthera pardus NC010641 5           | 0,18912829 |
| Procyon lotor AB462046 3              | Cynogale bennetti KY117544 1         | 0,18913192 |
| Vulpes corsac NC023958 1              | Urva semitorquata MH464789 1         | 0,18913318 |
| Vulpes lagopus NC026529 3             | Urva brachyura KY117547 1            | 0,18913355 |
| Salanoia concolor D378 1              | Bassaricyon neblina SRX1097850 1     | 0,18913375 |
| Ursus thibetanus thibetanus NC011118  | Cuon alpinus NC013445 3              | 0,18913385 |
| Phocarcotus hookeri NC008418 1        | Conepatus chinga NC042596 1          | 0,18913458 |
| Panthera pardus NC010641 5            | Lyaon pictus NC028427 2              | 0,18913627 |
| Vulpes lagopus NC026529 3             | Mustela sibirica AP017394 11         | 0,18913634 |
| Vulpes lagopus NC026529 3             | Mustela sibirica NC020637 6          | 0,18913655 |
| Nyctereutes procyonoides NC013700 3   | Galidictis fasciata DM333 1          | 0,18913704 |
| Vulpes zerdia K1603240 1              | Mustela putorius NC020638 4          | 0,18913759 |
| Vulpes corsac NC023958 1              | Chrotogale owstoni T607 1            | 0,18913761 |
| Procyon lotor AB462049 4              | Urva javanica T413 1                 | 0,18913791 |
| Otaria byronia OTAB 1                 | Mungotictis decemlineata NC027828 1  | 0,18913852 |
| Ursus thibetanus laniger MH281753 2   | Panthera pardus NC010641 5           | 0,18914087 |
| Atilax paludinosus T606 1             | Arctotherium sp NC030174 1           | 0,18914104 |
| Vulpes corsac NC023958 1              | Paradoxurus hermaphroditus NLNC 1    | 0,18914193 |
| Vulpes lagopus NC026529 3             | Paradoxurus hermaphroditus NC03959   | 0,18914211 |
| Viverra zibetha T609 1                | Urocyon cinereoargenteus NC026723 2  | 0,18914573 |
| Paradoxurus hermaphroditus NC03959    | Martes pennanti NC020664 16          | 0,18914731 |
| Proteles cristata T393 6              | Meles meles T303 3                   | 0,18914789 |
| Panthera onca KP202264 2              | Neophoca cinerea NC008419 1          | 0,18914899 |
| Melogale moschata NC020644 1          | Cryptoprocta ferox FC113 1           | 0,18914992 |
| Ursus maritimus GUS73488 Svalbard     | Canis latrans NC008093 7             | 0,18914996 |
| Panthera tigris amoyensis NC014770 2  | Lutra lutra NC011358 9               | 0,18915172 |
| Leopardus guigna NC028321 1           | Bassaricyon neblina SRX1097850 1     | 0,18915334 |
| Potos flavus T414 1                   | Panthera tigris amoyensis NC014770 2 | 0,18915361 |
| Leopardus geoffroyi NC028320 1        | Bassaricyon neblina SRX1097850 1     | 0,18915392 |
| Ursus arctos pruinus MG066703 3       | Salanoia concolor D378 1             | 0,18915488 |
| Ursus arctos uncinus NC010638 1       | Arctodus simus NC011116 1            | 0,18915489 |
| Pardofelis marmorata NLN3 2           | Otocyon megalotis SAF 2              | 0,18915603 |
| Ursus maritimus GUS73488 Svalbard     | Panthera pardus japonensis K1866876  | 0,18915725 |
| Panthera onca NC022842 1              | Martes americana NC020642 1          | 0,18915741 |
| Ursus arctos GUS73491 207             | Lynx pardinus NC028319 161           | 0,18915759 |
| Nyctereutes procyonoides NC013700 3   | Cryptoprocta ferox FC113 1           | 0,18915915 |
| Ursus arctos GUS73486 5               | Cryptoprocta ferox FC113 1           | 0,18915996 |
| Speothos venaticus C48 2              | Arctodus simus NC011116 1            | 0,18916029 |
| Ursus thibetanus mupiniensis NC00875  | Paradoxurus hermaphroditus NC03959   | 0,18916053 |
| Odobenus rosmarus NC004029 29         | Martes zibellina NC011579 39         | 0,18916107 |
| Panthera leo spelaea KX258452 2       | Canis anthus NC027956 2              | 0,18916129 |
| Ursus spelaeus EU327344 13            | Galidictis fasciata DM333 1          | 0,18916206 |
| Procyon lotor AB462049 4              | Panthera onca NC022842 1             | 0,18916284 |
| Ursus arctos pruinus MG066703 3       | Leopardus guigna NC028321 1          | 0,1891629  |
| Prionodon pardicolor NC024569 2       | Ichneumia albicauda T603 1           | 0,18916407 |
| Prionailurus planiceps NC028312 6     | Ailuropoda melanoleuca NC009492 5    | 0,18916506 |
| Prionailurus rubiginosus NC028304 2   | Ailuropoda melanoleuca NC009492 5    | 0,18916576 |
| Ursus americanus JX196366 3           | Xenogale naso C07XAR110 1            | 0,18916805 |
| Neofelis nebulosa NC008450 3          | Enhydra lutris NC009692 1            | 0,18917681 |
| Nyctereutes procyonoides NC013700 3   | Eumetopias jubatus NC004030 10       | 0,18918195 |
| Ursus thibetanus thibetanus NC011118  | Diplogale hoesi MH464790 1           | 0,18918318 |
| Neofelis nebulosa NC008450 3          | Melogale moschata NC020644 1         | 0,18918845 |
| Ursus spelaeus NC011112 8             | Odobenus rosmarus NC004029 29        | 0,18918975 |
| Urva semitorquata MH464789 1          | Canis mesomelas KT448280 1           | 0,18919121 |
| Martes zibellina NC011579 39          | Helogale parvula SRR7637809 1        | 0,18919763 |
| Ursus spelaeus NC011112 8             | Canis lupus familiaris NC002008 1231 | 0,18919875 |
| Ursus arctos AP012576 6               | Canis lupus familiaris NC002008 1231 | 0,18919902 |
| Genetta genetta T297 1                | Tapirus terrestris T358              | 0,18919915 |
| Suricata suricatta SSM10 1            | Arctocepalus australis MG023139 1    | 0,18919933 |
| Nasua nasua NC020647 1                | Arctocepalus townsendi NC008420 1    | 0,1892     |
| Nyctereutes procyonoides NC013700 3   | Lontra canadensis SRR10409165 1      | 0,18920062 |

|                                       |                                       |            |
|---------------------------------------|---------------------------------------|------------|
| Monachus schauinslandi NC008421 1     | Martes pennanti NC020664 16           | 0,17238161 |
| Leopardus jacobita NC028322 1         | Cystophora cristata NC008427 1        | 0,17238176 |
| Puma concolor NC016470 22             | Phoca groenlandica NC008429 54        | 0,17238784 |
| Monachus schauinslandi NC008421 1     | Leopardus pardalis T262 1             | 0,1723882  |
| Prionailurus planiceps KY682741 4     | Mirounga angustirostris SRR10331586 1 | 0,17238893 |
| Pusa hispida NC 008433 1              | Prionailurus planiceps KY682741 4     | 0,17238951 |
| Leptonyx chotes weddellii NC008424 1  | Arctictis binturong T605 2            | 0,172392   |
| Paradoxurus jerdoni MH464793 1        | Canis adustus KT448271 1              | 0,17240092 |
| Monachus monachus NC004972 5          | Felis chaus NC028307 1                | 0,17240936 |
| Monachus schauinslandi NC008421 1     | Chrotogale owstoni T607 1             | 0,17243084 |
| Mustela sibirica NC020637 6           | Bassaricyon neblina SRX1097850 1      | 0,17243236 |
| Mungos mungo MM7C 1                   | Erigonathus barbatus NC008426 1       | 0,17243627 |
| Pusa hispida NC 008433 1              | Hemigalus derbyanus MH464791 1        | 0,1724382  |
| Monachus schauinslandi NC008421 1     | Hemigalus derbyanus MH464791 1        | 0,17244233 |
| Mustela eversmannii NC028013 1        | Monachus schauinslandi NC008421 1     | 0,17244242 |
| Lobodon carcinophaga NC008423 1       | Urva semitorquata MH464789 1          | 0,17244583 |
| Erigonathus barbatus NC008426 1       | Caracal caracal NC028306 1            | 0,17244631 |
| Leptailurus serval NC028316 1         | Canis adustus KT448271 1              | 0,17244951 |
| Phoca fasciata NC008428 1             | Mustela altaica NC021751 1            | 0,17245074 |
| Pusa hispida NC 008433 1              | Lutrogale perspicillata NC035811 1    | 0,17245312 |
| Puma yagouaroundi NC028311 1          | Phoca fasciata NC008428 1             | 0,17245533 |
| Ichneumia albicauda T603 1            | Hydrurga leptonyx NC008425 1          | 0,17245753 |
| Pusa hispida NC 008433 1              | Leopardus geoffroyi NC028320 1        | 0,17245892 |
| Prionailurus bengalensis CKM45 20     | Phoca largha NC008430 1               | 0,1724648  |
| Mustela itatsi NC034330 19            | Monachus monachus NC004972 5          | 0,17246583 |
| Monachus monachus NC004972 5          | Leopardus jacobita NC028322 1         | 0,17247763 |
| Mirounga leonina NC008422 1           | Conepatus chinga NC042596 1           | 0,17249602 |
| Pusa caspica NC008431 1               | Bassaricyon neblina SRX1097850 1      | 0,17250076 |
| Pusa sibirica NC008432 2              | Ailurus fulgens styani NC009691 1     | 0,17250191 |
| Mirounga angustirostris SRR10331586 1 | Martes zibellina NC011579 39          | 0,17251015 |
| Viverra zibetha T609 1                | Cystophora cristata NC008427 1        | 0,17251132 |
| Felis catus NC001700 2                | Cystophora cristata NC008427 1        | 0,17251363 |
| Poecilogale albinucha T602 1          | Leptonyx chotes weddellii NC008424 1  | 0,17251426 |
| Lobodon carcinophaga NC008423 1       | Bassaricyon neblina SRX1097850 1      | 0,17251705 |
| Ommatophoca rossii AY377287etc 1      | Neovison vison NC020641 3             | 0,17251877 |
| Monachus schauinslandi NC008421 1     | Leopardus tigrinus NC028317 1         | 0,17252226 |
| Lobodon carcinophaga NC008423 1       | Genetta genetta T297 1                | 0,1725238  |
| Phoca fasciata NC008428 1             | Leopardus guigna NC028321 1           | 0,17252494 |
| Phoca groenlandica NC008429 54        | Ailuropoda melanoleuca NC009492 5     | 0,17252894 |
| Proteles cristata T393 6              | Diplogale hoesi MH464790 1            | 0,17253453 |
| Panthera leo NERO 19                  | Leptonyx chotes weddellii NC008424 1  | 0,17254061 |
| Monachus monachus NC004972 5          | Felis margarita NC028308 1            | 0,17254382 |
| Halichoerus grypus NC001602 2         | Ailurus fulgens styani NC009691 1     | 0,17254394 |
| Monachus monachus NC004972 5          | Leopardus guigna NC028321 1           | 0,1725487  |
| Lontra canadensis SRR10409165 1       | Erigonathus barbatus NC008426 1       | 0,17255639 |
| Leopardus wiedii NC028318 1           | Halichoerus grypus NC001602 2         | 0,17255646 |
| Parahaena brunnea NC038159 15         | Cynogale bennetti KY117544 1          | 0,17255696 |
| Salanoia concolor D378 1              | Pusa caspica NC008431 1               | 0,17257194 |
| Procyon lotor AB462046 3              | Cystophora cristata NC008427 1        | 0,17257236 |
| Neovison vison NC020641 3             | Nandinia binotata NC024567 1          | 0,17257613 |
| Martes foina NC020643 1               | Ailurus fulgens NC001124 1            | 0,17257746 |
| Puma concolor NC016470 22             | Mirounga leonina NC008422 1           | 0,17257795 |
| Poecilogale albinucha T602 1          | Ailurus fulgens NC001124 1            | 0,17257956 |
| Lobodon carcinophaga NC008423 1       | Helogale parvula SRR7637809 1         | 0,17257993 |
| Procyon lotor AB462049 4              | Phoca vitulina NC001325 1             | 0,17258269 |
| Procyon lotor AB462046 3              | Phoca vitulina NC001325 1             | 0,17258327 |
| Pusa caspica NC008431 1               | Leptailurus serval NC028316 1         | 0,17258365 |
| Poecilogale albinucha T602 1          | Cystophora cristata NC008427 1        | 0,17258476 |
| Phoca fasciata NC008428 1             | Mustela nivalis T306 5                | 0,17258513 |
| Prionailurus planiceps KY682741 4     | Phoca fasciata NC008428 1             | 0,17258927 |
| Ursus arctos AP012576 6               | Mirounga leonina NC008422 1           | 0,17259556 |
| Prionailurus bengalensis CKM45 20     | Mirounga angustirostris SRR10331586 1 | 0,17259589 |
| Phoca largha NC008430 1               | Leopardus wiedii NC028318 1           | 0,17259812 |
| Parahaena brunnea NC038159 15         | Hydrurga leptonyx NC008425 1          | 0,17259929 |
| Mustela nigripes NC024942 1           | Monachus monachus NC004972 5          | 0,17260042 |
| Panthera onca NC022842 1              | Lobodon carcinophaga NC008423 1       | 0,17260224 |
| Phoca fasciata NC008428 1             | Canis adustus KT448271 1              | 0,17260502 |
| Ursus arctos AP012576 6               | Phoca vitulina NC001325 1             | 0,17260702 |
| Hydrurga leptonyx NC008425 1          | Urva javanica/auropunctata NC006835 1 | 0,17261414 |
| Spilogale putorius NC010497 1         | Mirounga angustirostris SRR10331586 1 | 0,17261437 |
| Martes melampus NC009678 1            | Ailurus fulgens styani NC009691 1     | 0,17262916 |
| Lynx lynx NC027083 4                  | Halichoerus grypus NC001602 2         | 0,17263234 |
| Urva semitorquata MH464789 1          | Cystophora cristata NC008427 1        | 0,17263669 |
| Pusa sibirica NC008432 2              | Eupleres goodii D128 1                | 0,17263681 |
| Pusa caspica NC008431 1               | Procyon lotor AB462046 3              | 0,17263927 |
| Mirounga leonina NC008422 1           | Lynx lynx NC027083 4                  | 0,17264387 |
| Hydrurga leptonyx NC008425 1          | Cynictis penicillata T375 1           | 0,17264734 |
| Spilogale putorius NC010497 1         | Phoca fasciata NC008428 1             | 0,1726485  |
| Martes melampus NC009678 1            | Mirounga leonina NC008422 1           | 0,17264949 |
| Lynx lynx NC027083 4                  | Puma concolor NC016470 22             | 0,17265022 |
| Urva semitorquata MH464789 1          | Prionailurus bengalensis NC028301 12  | 0,17265083 |
| Pusa sibirica NC008432 2              | Leopardus pardalis T262 1             | 0,17265213 |
| Pusa caspica NC008431 1               | Canis adustus KT448271 1              | 0,17265585 |
| Mirounga leonina NC008422 1           | Mirounga angustirostris SRR10331586 1 | 0,17265821 |
| Prionailurus planiceps KY682741 4     | Monachus schauinslandi NC008421 1     | 0,17266087 |
| Zalophus californianus NC008416 1     | Taxidea taxus NC020646 1              | 0,17267169 |
| Monachus monachus NC004972 5          | Leopardus pardalis NC028315 1         | 0,17267565 |
| Monachus monachus NC004972 5          | Leopardus pardalis T262 1             | 0,17267607 |
| Monachus monachus NC004972 5          | Felis catus NC001700 2                | 0,17267871 |
| Monachus monachus NC004972 5          | Genetta abyssinica MG489822 1         | 0,17268485 |
| Erigonathus barbatus NC008426 1       | Conepatus chinga NC042596 1           | 0,17269444 |
| Cystophora cristata NC008427 1        | Crossarchus platycephalus C7R66 1     | 0,17270401 |
| Mirounga leonina NC008422 1           | Aonyx cinerea NC035814 2              | 0,17270894 |
| Paguma larvata PDD511 2               | Leptonyx chotes weddellii NC008424 1  | 0,17271313 |
| Cystophora cristata NC008427 1        | Civetictis civetta GLC19 1            | 0,17271382 |
| Mirounga angustirostris SRR10331586 1 | Aonyx cinerea NC035814 2              | 0,17271397 |
| Prionodon linsang ERR2391707 1        | Crocuta crocuta NC020670 3            | 0,17272273 |
| Phoca fasciata NC008428 1             | Lynx pardinus NC028319 161            | 0,17272277 |
| Felis silvestris lybica KP202275 4    | Canis adustus KT448271 1              | 0,17272297 |
| Viverricula indica XK891745 1         | Canis adustus KT448271 1              | 0,17272645 |
| Nandinia binotata NC024567 1          | Lutra lutra LC050126 1                | 0,17272623 |
| Lutra sumatrana NC035810 1            | Ailurus fulgens styani NC009691 1     | 0,17272634 |
| Leopardus pardalis T262 1             | Halichoerus grypus NC001602 2         | 0,17276888 |

|                                       |                                      |            |
|---------------------------------------|--------------------------------------|------------|
| Urocyon cinereoargenteus NC026723 3   | Martes zibellina NC0011579 39        | 0,1892013  |
| Nyctereutes procyonoides NC013700 3   | Arctocepalus australis MGO23139 1    | 0,18920229 |
| Urocyon littoralis catalinae KP129018 | Meles meles T303 3                   | 0,18920273 |
| Phocartos hookeri NC008418 1          | Mungotictis decemlineata NC027828 1  | 0,18920332 |
| Phocartos hookeri NC008418 1          | Galidictis fasciata DM333 1          | 0,18920343 |
| Mustela eversmannii NC028013 1        | Mungotictis decemlineata NC027828 1  | 0,18920371 |
| Felis catus NC001700 2                | Tapirus terrestris T358              | 0,18920515 |
| Urva javanica T413 1                  | Arctotherium sp NC030174 1           | 0,18920782 |
| Ichneumia albicauda T603 1            | Canis mesomelas KT448280 1           | 0,18920943 |
| Viverricula indica NC025296 2         | Lontra canadensis SRR10409165 1      | 0,18921162 |
| Ursus arctos isabellinus 1885 2       | Lutrogale perspicillata NC035811 1   | 0,18921188 |
| Vulpes corsac NC023958 1              | Panthera uncia KP202269 1            | 0,18921298 |
| Martes zibellina NC011579 39          | Hyaena hyaena NC020669 1             | 0,18921313 |
| Puma concolor NC016470 22             | Arctocepalus townsendi NC008420 1    | 0,18921317 |
| Ursus thibetanus mupinensis NC00875   | Mungos mungo/gambianus SRR77048      | 0,1892135  |
| Ursus thibetanus mupinensis NC00875   | Galidia elegans D146 1               | 0,18921439 |
| Poecilogale albinucha T602 1          | Helogale parvula SRR7637809 1        | 0,18921466 |
| Panthera pardus japonensis KJ866876   | Nyctereutes procyonoides NC013700 3  | 0,18921569 |
| Urocyon cinereoargenteus NC026723 3   | Felis silvestris lybica KP202275 4   | 0,18921576 |
| Ursus arctos GU573491 207             | Bassaricyon neblina SRX1097850 1     | 0,18921638 |
| Martes americana NC020642 1           | Chrysocyon brachyurus NC024172 1     | 0,18921673 |
| Poecilogale albinucha T602 1          | Mungotictis decemlineata NC027828 1  | 0,18921675 |
| Urocyon cinereoargenteus NC026723 3   | Neovison vison NC020641 3            | 0,18921693 |
| Xenogale naso C07XAR110 1             | Chrysocyon brachyurus NC024172 1     | 0,18921839 |
| Ursus arctos GU573486 5               | Helogale parvula SRR7637809 1        | 0,1892186  |
| Odobenus rosmarus NC004029 29         | Martes melampus NC009678 1           | 0,18922351 |
| Ursus arctos isabellinus 1885 2       | Ichneumia albicauda T603 1           | 0,18922356 |
| Panthera tigris amoyensis NC014770 2  | Canis anthus NC027956 2              | 0,18922369 |
| Ursus thibetanus formosanus NC0093    | Cynictis penicillata T375 1          | 0,18922371 |
| Panthera leo spelaea XK258452 2       | Melogale moschata V0735A 1           | 0,18922384 |
| Ursus arctos isabellinus 1885 2       | Panthera onca KP202264 2             | 0,18922384 |
| Helarctos malayanus NC009968 2        | Attilax paludinosus T606 1           | 0,1892252  |
| Ursus maritimus GU573488 Svalbard     | Leopardus tigrinus NC028317 1        | 0,18922588 |
| Ursus spelaeus NC011112 8             | Helogale parvula SRR7637809 1        | 0,18922609 |
| Paradoxurus jerdoni MH464793 1        | Otaria byronia OTAB 1                | 0,1892285  |
| Ursus maritimus GU573488 Svalbard     | Leopardus guigna NC028321 1          | 0,18923    |
| Ursus spelaeus EU327344 13            | Canis latrans NC008093 7             | 0,18923119 |
| Zalophus californianus NC008416 1     | Vulpes lagopus NC026529 3            | 0,18923189 |
| Felis margarita NC028308 1            | Ailuropoda melanoleuca NC009492 5    | 0,18923244 |
| Viverricula indica XK891751 1         | Galictis vittata T412 1              | 0,18923253 |
| Panthera onca KP202264 2              | Helarctos malayanus NC009968 2       | 0,18923263 |
| Mephitis mephitis NC020648 1          | Lynx pardinus NC028319 161           | 0,18923748 |
| Ursus spelaeus EU327344 13            | Ichneumia albicauda T603 1           | 0,18923825 |
| Catopuma temminckii NC027115 41       | Ailuropoda melanoleuca NC009492 5    | 0,18923916 |
| Melogale moschata NC020644 1          | Canis mesomelas KT448280 1           | 0,1892392  |
| Speothos venaticus C48 2              | Helarctos malayanus NC009968 2       | 0,18924043 |
| Ursus arctos AP012576 6               | Lynx rufus NC014456 3                | 0,18924111 |
| Ursus americanus JX196366 3           | Helogale parvula SRR7637809 1        | 0,18924245 |
| Ursus arctos AP012576 6               | Prionailurus bengalensis NC028301 12 | 0,189243   |
| Panthera uncia NC010638 1             | Canis lupus chanco NC010340 4        | 0,18924344 |
| Nyctereutes procyonoides NC013700 3   | Arctocepalus forsteri NC004023 28    | 0,1892457  |
| Tremarctos ornatus NC009969 2         | Panthera leo NERO 19                 | 0,18924622 |
| Hyaena hyaena NC020669 1              | Nyctereutes procyonoides NC013700 3  | 0,18924633 |
| Ursus thibetanus JX196366 3           | Cryptoprocta ferox FC13 1            | 0,18924829 |
| Mephitis mephitis NC020648 1          | Acinonyx jubatus NC005212 3          | 0,18924853 |
| Poecilogale albinucha T602 1          | Urva javanica/auropunctata NC006835  | 0,18925019 |
| Panthera onca NC022842 1              | Canis mesomelas KT448280 1           | 0,18925035 |
| Ursus americanus JX196366 3           | Pardofelis marmorata N1N3 2          | 0,18925601 |
| Ursus maritimus NC003428 31           | Diplogale hoesi MH464790 1           | 0,18925774 |
| Neofelis nebulosa NC008450 3          | Mustela nivalis T306 5               | 0,1892584  |
| Lycan pictus NC028427 2               | Eumetopias jubatus NC004030 10       | 0,18925884 |
| Ursus americanus JX196366 3           | Panthera onca KP202264 2             | 0,18925945 |
| Paradoxurus hermaphroditus NC03959    | Eumetopias jubatus NC004030 10       | 0,18926206 |
| Ursus arctos isabellinus 1885 2       | Canis mesomelas KT448280 1           | 0,18926336 |
| Zalophus wolfebaeki SRR4431565 1      | Panthera leo NERO 19                 | 0,1892651  |
| Vulpes ferrillata NC027935 1          | Lutra lutra LC050126 1               | 0,18926515 |
| Lontra canadensis SRR10409165 1       | Arctocepalus australis MGO23139 1    | 0,18926637 |
| Phocartos hookeri NC008418 1          | Attilax paludinosus T606 1           | 0,18926793 |
| Vulpes zerdia KJ603240 1              | Meles meles T303 3                   | 0,18926865 |
| Nyctereutes procyonoides NC013700 3   | Arctocepalus townsendi NC008420 1    | 0,18926899 |
| Ursus maritimus NC003428 31           | Conepatus chinga NC042596 1          | 0,18927038 |
| Vulpes ferrillata NC027935 1          | Galidictis fasciata DM333 1          | 0,18927223 |
| Mustela kathiahi NC023210 1           | Galidia elegans D146 1               | 0,1892727  |
| Galidictis fasciata DM333 1           | Ailurus fulgens styani NC009691 1    | 0,18927339 |
| Ursus americanus JX196366 3           | Diplogale hoesi MH464790 1           | 0,1892786  |
| Lontra canadensis SRR10409165 1       | Hyaena hyaena NC020669 1             | 0,18927889 |
| Ursus arctos EU497665 29              | Lutrogale perspicillata NC035811 1   | 0,18927906 |
| Ursus thibetanus mupinensis NC00875   | Xenogale naso C07XAR110 1            | 0,18928027 |
| Phocartos hookeri NC008418 1          | Paradoxurus hermaphroditus N1N3 1    | 0,18928041 |
| Vulpes lagopus NC026529 3             | Panthera pardus japonensis KJ866876  | 0,18928042 |
| Ursus spelaeus NC011112 8             | Canis lupus chanco NC010340 4        | 0,18928057 |
| Panthera uncia KP202269 1             | Melogale moschata V0735A 1           | 0,1892806  |
| Phocartos hookeri NC008418 1          | Ichneumia albicauda T603 1           | 0,18928072 |
| Cryptoprocta ferox FC13 1             | Arctocepalus townsendi NC008420 1    | 0,18928097 |
| Tremarctos ornatus NC009969 2         | Panthera onca KP202264 2             | 0,18928179 |
| Ursus americanus JX196366 3           | Ictonyx striatus T299 1              | 0,18928237 |
| Urocyon littoralis catalinae KP129018 | Lynx rufus NC014456 3                | 0,1892824  |
| Urocyon cinereoargenteus NC026723 3   | Puma yagouaroundi NC028311 1         | 0,18928412 |
| Speothos venaticus C48 2              | Mustela sibirica AP017394 11         | 0,18928427 |
| Ursus arctos pruinosus MGO66703 3     | Procyon lotor AB462046 3             | 0,1892851  |
| Ursus arctos isabellinus 1885 2       | Canis lupus chanco NC010340 4        | 0,18928532 |
| Lynx pardinus NC028319 161            | Bassaricyon neblina SRX1097850 1     | 0,18928567 |
| Profelis aurata NC028299 1            | Neophoca cinerea NC008419 1          | 0,18928589 |
| Panthera uncia NC010638 1             | Bassaricyon sumichrasti SRX1099089 1 | 0,18928693 |
| Eumetopias jubatus NC004030 10        | Canis aureus KT448274 1              | 0,18928711 |
| Potos flavus T414 1                   | Panthera tigris NC010642 35          | 0,18928839 |
| Odobenus rosmarus NC004029 29         | Mustela sibirica AP017394 11         | 0,18928951 |
| Ursus maritimus NC003428 31           | Ichneumia albicauda T603 1           | 0,18929084 |
| Ursus maritimus GU573488 Svalbard     | Ichneumia albicauda T603 1           | 0,18929087 |
| Panthera leo spelaea XK258452 2       | Melogale moschata V0735A 1           | 0,18929142 |
| Mungos mungo/gambianus SRR77048       | Melursus ursinus NC009970 2          | 0,18929207 |
| Ursus arctos pruinosus MGO66703 3     | Lynx canadensis NC028313 1           | 0,18929209 |
| Otaria byronia OTAB 1                 | Felis chaus NC028307 1               | 0,18929276 |

|                                       |                                       |            |
|---------------------------------------|---------------------------------------|------------|
| Mustela sibirica AP017394 11          | Bassaricyon neblina SRX1097850 1      | 0,17276888 |
| Lutrogale perspicillata NC035811 1    | Bassariscus sumichrasti SRX1099089 1  | 0,17277224 |
| Pusa caspica NC008431 1               | Procyon lotor AB462049 4              | 0,17277351 |
| Mirounga angustirostris SRR10331586 1 | Martes americana NC020642 1           | 0,17277994 |
| Mirounga angustirostris SRR10331586 1 | Melogale moschata KP726273 1          | 0,17277977 |
| Hydrurga leptonyx NC008425 1          | Xenogale naso C07XAR110 1             | 0,17278302 |
| Profelis aurata NC028299 1            | Cystophora cristata NC008427 1        | 0,17278412 |
| Cystophora cristata NC008427 1        | Caracal caracal NC028306 1            | 0,17278416 |
| Nyctereutes procyonoides NC013700 3   | Lobodon carcinophaga NC008423 1       | 0,17278573 |
| Salanoia concolor D378 1              | Pusa hispida NC 008433 1              | 0,17278583 |
| Pusa hispida NC 008433 1              | Prionailurus planiceps NC028312 6     | 0,1727936  |
| Pusa hispida NC 008433 1              | Prionailurus viverrinus NC028305 1    | 0,17279615 |
| Phoca vitulina NC001325 1             | Lynx canadensis NC028313 1            | 0,17279701 |
| Monachus monachus NC044972 5          | Martes melampus NC009678 1            | 0,17279768 |
| Viverra tangalunga MH464792 1         | Monachus monachus NC044972 5          | 0,17280209 |
| Smilodon populator MF871700 1         | Mirounga angustirostris SRR10331586 1 | 0,17280255 |
| Phoca groenlandica NC008429 54        | Acinonyx jubatus NC005212 3           | 0,17280796 |
| Procyon lotor AB462046 3              | Monachus monachus NC044972 5          | 0,17281032 |
| Lobodon carcinophaga NC008423 1       | Ura javanica/auripunctata NC006835 1  | 0,17281596 |
| Pusa hispida NC 008433 1              | Civettictis civetta NC03378 1         | 0,17282717 |
| Leptailurus serval NC028316 1         | Halichoerus grypus NC001602 2         | 0,17283206 |
| Mustela kathiah NC023210 1            | Ailurus fulgens NC011224 1            | 0,17284182 |
| Viverricula indica XK891751 1         | Pusa sibirica NC008432 2              | 0,17284746 |
| Mirounga leonina NC008422 1           | Leptailurus serval NC028316 1         | 0,17284808 |
| Mirounga leonina NC008422 1           | Ictonyx striatus T299 1               | 0,17284904 |
| Lynx canadensis NC028313 1            | Cystophora cristata NC008427 1        | 0,17284961 |
| Procyon lotor AB462049 4              | Phoca largha NC008430 1               | 0,17285199 |
| Monachus schauinslandi NC008421 1     | Caracal caracal NC028306 1            | 0,17285632 |
| Monachus schauinslandi NC008421 1     | Lynx pardinus NC028319 161            | 0,17285846 |
| Pusa hispida NC 008433 1              | Lynx pardinus NC028319 161            | 0,17286132 |
| Pusa hispida NC 008433 1              | Leopardus jacobita NC028322 1         | 0,17286295 |
| Viverricula indica NC025296 2         | Phoca largha NC008430 1               | 0,17286398 |
| Phoca largha NC008430 1               | Leptailurus serval NC028316 1         | 0,17286567 |
| Martes flavigula NC012141 3           | Ailurus fulgens NC011124 1            | 0,17286812 |
| Pusa caspica NC008431 1               | Acinonyx jubatus NC005212 3           | 0,17286889 |
| Profelis aurata NC028299 1            | Monachus monachus NC044972 5          | 0,17288052 |
| Ursus americanus JX196366 3           | Phoca vitulina NC001325 1             | 0,17288443 |
| Mustela altaica NC021751 1            | Halichoerus grypus NC001602 2         | 0,17289667 |
| Neovison vison NC020641 3             | Hemigalus derbyanus MH464791 1        | 0,17290124 |
| Erignathus barbatus NC008426 1        | Bassaricyon neblina SRX1097850 1      | 0,17290466 |
| Pusa caspica NC008431 1               | Ailurus fulgens NC011124 1            | 0,17290567 |
| Suricata suricatta SSM10 1            | Leptonyx chotes weddellii NC008424 1  | 0,17290601 |
| Galidia elegans D146 1                | Cynogale bennetti KY117544 1          | 0,1729137  |
| Viverricula indica XK891751 1         | Pusa caspica NC008431 1               | 0,1729148  |
| Hemigalus derbyanus MH464791 1        | Arctonox collaris NC020645 1          | 0,17291613 |
| Hydrurga leptonyx NC008425 1          | Bdeogale nigripes GLC15 1             | 0,17291722 |
| Procyon lotor AB462049 4              | Phoca fasciata NC008428 1             | 0,17291731 |
| Pusa sibirica NC008432 2              | Leopardus geoffroyi NC028320 1        | 0,17292129 |
| Monachus schauinslandi NC008421 1     | Canis adustus KT448271 1              | 0,17292276 |
| Pusa hispida NC 008433 1              | Genetta servalina NC024568 2          | 0,17292373 |
| Smilodon populator MF871700 1         | Phoca fasciata NC008428 1             | 0,17292398 |
| Phoca groenlandica NC008429 54        | Lynx lynx NC027083 4                  | 0,17292468 |
| Phoca groenlandica NC008429 54        | Lynx rufus NC014456 3                 | 0,17292494 |
| Monachus schauinslandi NC008421 1     | Lynx canadensis NC028313 1            | 0,17292605 |
| Lobodon carcinophaga NC008423 1       | Ichneumia albicauda T603 1            | 0,17292918 |
| Otocolobus manul NC028323 1           | Mirounga angustirostris SRR10331586 1 | 0,17292932 |
| Phoca largha NC008430 1               | Lynx canadensis NC028313 1            | 0,17293184 |
| Lobodon carcinophaga NC008423 1       | Arctictis binturong T605 2            | 0,17293766 |
| Lutra sumatrana NC035810 1            | Bassaricyon neblina SRX1097850 1      | 0,17296904 |
| Cystophora cristata NC008427 1        | Cynictis penicillata T375 1           | 0,17297333 |
| Monachus monachus NC044972 5          | Diplogale hosei MH464790 1            | 0,17297645 |
| Viverra tangalunga MH464792 1         | Monachus schauinslandi NC008421 1     | 0,17298038 |
| Mustela putorius NC020638 4           | Mirounga angustirostris SRR10331586 1 | 0,1729835  |
| Mirounga leonina NC008422 1           | Civettictis civetta GLC19 1           | 0,17298371 |
| Pusa sibirica NC008432 2              | Lynx canadensis NC028313 1            | 0,17298567 |
| Vulpes vulpes NC008434 5              | Lobodon carcinophaga NC008423 1       | 0,17298791 |
| Salanoia concolor D378 1              | Phoca largha NC008430 1               | 0,17299014 |
| Ursus arctos prunosus MG066703 3      | Mirounga leonina NC008422 1           | 0,17299162 |
| Phoca fasciata NC008428 1             | Galarella sanguinea T378 1            | 0,17299214 |
| Prionailurus planiceps NC028312 6     | Phoca fasciata NC008428 1             | 0,17299326 |
| Prionailurus viverrinus NC028305 1    | Phoca fasciata NC008428 1             | 0,17299525 |
| Pusa hispida NC 008433 1              | Poecilogale albinucha T602 1          | 0,17299837 |
| Phoca fasciata NC008428 1             | Ailuropoda melanoleuca NC009492 5     | 0,17300047 |
| Neovison vison NC020641 3             | Mephitis mephitis NC020648 1          | 0,17300771 |
| Cystophora cristata NC008427 1        | Canis adustus KT448271 1              | 0,17300808 |
| Ommatophoca ossii AY377287etc 1       | Meles leucurus NC039173 4             | 0,17301138 |
| Hydrurga leptonyx NC008425 1          | Canis lupus familiaris NC002008 1231  | 0,17301549 |
| Prionailurus viverrinus NC028305 1    | Monachus monachus NC044972 5          | 0,17301704 |
| Spilogale putorius NC010497 1         | Mustela erminea T305 2                | 0,17301747 |
| Mustela itatsi NC034330 19            | Bassaricyon neblina SRX1097850 1      | 0,1730381  |
| Mirounga angustirostris SRR10331586 1 | Chrotogale owstoni T607 1             | 0,17304635 |
| Viverricula indica XK891745 1         | Pusa sibirica NC008432 2              | 0,17304949 |
| Prionailurus rubiginosus NC028304 2   | Mirounga leonina NC008422 1           | 0,17304952 |
| Hydrurga leptonyx NC008425 1          | Ura brachyura KY117547 1              | 0,1730507  |
| Phoca fasciata NC008428 1             | Genetta servalina NC024568 2          | 0,17305233 |
| Phoca groenlandica NC008429 54        | Genetta servalina NC024568 2          | 0,17305233 |
| Pusa caspica NC008431 1               | Lynx rufus NC014456 3                 | 0,17305297 |
| Mustela erminea T305 2                | Leopardus wiedii NC028318 1           | 0,17305338 |
| Mustela erminea T305 2                | Arctodus simus NC011116 1             | 0,17305788 |
| Puma yagouaroundi NC028311 1          | Monachus schauinslandi NC008421 1     | 0,17306013 |
| Prionailurus rubiginosus NC028304 2   | Phoca fasciata NC008428 1             | 0,17306118 |
| Phoca fasciata NC008428 1             | Leopardus tigrinus NC028317 1         | 0,17306261 |
| Halichoerus grypus NC001602 2         | Canis adustus KT448271 1              | 0,17306799 |
| Monachus schauinslandi NC008421 1     | Ailuropoda melanoleuca NC009492 5     | 0,1730745  |
| Ursus arctos AP012576 6               | Mirounga angustirostris SRR10331586 1 | 0,17308086 |
| Paradoxurus hermaphroditus NLNC 1     | Canis adustus KT448271 1              | 0,17308283 |
| Puma concolor NC016470 22             | Monachus monachus NC044972 5          | 0,17308283 |
| Nandinia binotata NC024567 1          | Meles anakuma NC009677 1              | 0,17310156 |
| Lutra lutra LC050126 1                | Bassaricyon neblina SRX1097850 1      | 0,17310363 |
| Leopardus pardalis NC028315 1         | Halichoerus grypus NC001602 2         | 0,17310533 |
| Viverricula indica XK891751 1         | Canis adustus KT448271 1              | 0,17310745 |
| Leptonyx chotes weddellii NC008424 1  | Cynictis penicillata T375 1           | 0,17314018 |
| Smilodon populator MF871700 1         | Canis adustus KT448271 1              | 0,17318058 |

|                                      |                                      |            |
|--------------------------------------|--------------------------------------|------------|
| Ursus arctos EU497665 29             | Felis margarita NC028308 1           | 0,18929332 |
| Ursus spelaeus EU327344 13           | Helogale parvula SRR7637809 1        | 0,18929338 |
| Panthera tigris amoyensis NC014770 2 | Aonyx cinerea NC035814 2             | 0,1892952  |
| Crocuta crocuta NC020670 3           | Arctodus simus NC011116 1            | 0,18929559 |
| Proteles cristata T393 6             | Arctodus simus NC011116 1            | 0,18929578 |
| Ursus spelaeus NC011112 8            | Mungotictis decemlineata NC027828 1  | 0,18929604 |
| Procyon lotor AB462049 4             | Ailuropoda melanoleuca NC009492 5    | 0,18929705 |
| Ursus arctos GUS73486 5              | Leopardus tigrinus NC028317 1        | 0,18929969 |
| Ursus arctos GUS73486 5              | Prionailurus viverrinus NC028305 1   | 0,18929988 |
| Panthera leo spelaea KX258452 2      | Aonyx cinerea NC035814 2             | 0,18930039 |
| Ursus thibetanus formosanus NC009333 | Parahaena brunnea NC038159 15        | 0,18930309 |
| Galidia elegans D146 1               | Canis aureus KT448274 1              | 0,18930456 |
| Ursus arctos isabellinus 18B5 2      | Mephitis mephitis NC020648 1         | 0,18930487 |
| Lutrogale perspicillata NC035811 1   | Genetta abyssinica MG489822 1        | 0,18930501 |
| Panthera onca KP202264 2             | Melurus ursinus NC009970 2           | 0,18930569 |
| Ursus maritimus NC003428 31          | Canis aureus KT448274 1              | 0,18931329 |
| Panthera uncia NC010638 1            | Canis lupus familiaris NC002008 1231 | 0,18931811 |
| Helarctos malayanus NC009968 2       | Chrysocyon brachyurus NC024172 1     | 0,18931909 |
| Attilax paludinosus T606 1           | Arctocepalus forsteri NC004023 28    | 0,18931918 |
| Ursus maritimus GUS73488 Svalbard    | Diplogale hosei MH464790 1           | 0,18931937 |
| Ursus maritimus NC003428 31          | Canis lupus familiaris NC002008 1231 | 0,18931989 |
| Xenogale naso C07XAR110 1            | Arctocepalus townsendi NC008420 1    | 0,18933369 |
| Prionodon linsang ERR2391707 1       | Martes zibellina NC011579 39         | 0,18933493 |
| Lontra canadensis SRR10409165 1      | Canis latrans NC008093 7             | 0,18933529 |
| Helogale parvula SRR7637809 1        | Arctocepalus gazella BK010918 1      | 0,18933573 |
| Nyctereutes procyonoides NC013700 3  | Lutra sumatrana NC035810 1           | 0,18933627 |
| Potos flavus T414 1                  | Nyctereutes procyonoides NC013700 3  | 0,18933687 |
| Lycalopex schuareza KT448284 1       | Enhydra lutris NC009692 1            | 0,1893374  |
| Ursus maritimus GUS73488 Svalbard    | Conepatus chinga NC024596 1          | 0,18933775 |
| Paradoxurus hermaphroditus NC03959   | Arctocepalus australis MG023139 1    | 0,18933827 |
| Paradoxurus jerdoni MH464793 1       | Arctocepalus gazella BK010918 1      | 0,18933982 |
| Paguma larvata PDD511 2              | Arctocepalus australis MG023139 1    | 0,18934005 |
| Ursus arctos GUS73486 5              | Canis lupus chanco NC010340 4        | 0,18934035 |
| Canis latrans NC008093 7             | Ailurus fulgens NC011124 1           | 0,18934178 |
| Panthera uncia KP202269 1            | Ailurus fulgens styani NC009691 1    | 0,18934241 |
| Ursus americanus JX196366 3          | Mephitis mephitis NC020648 1         | 0,18934244 |
| Vulpes lagopus NC026529 3            | Taxidea taxus NC020646 1             | 0,18934247 |
| Paradoxurus hermaphroditus NC03959   | Melogale moschata V0735A 1           | 0,18934262 |
| Lutra lutra NC011358 9               | Arctictis binturong T605 2           | 0,18934421 |
| Panthera uncia NC010638 1            | Mustela eversmanni NC028013 1        | 0,18934679 |
| Otocyon megalotis SAF1 2             | Mustela sibirica AP017394 11         | 0,18934715 |
| Martes melampus NC009678 1           | Crocuta crocuta NC020670 3           | 0,18934725 |
| Lycalopex schuareza KT448284 1       | Lutra sumatrana NC035810 1           | 0,18934746 |
| Prionodon linsang ERR2391707 1       | Martes foina NC020643 1              | 0,18934759 |
| Otocyon megalotis SAF1 2             | Lutra sumatrana NC035810 1           | 0,18934813 |
| Paradoxurus hermaphroditus NLNC 1    | Neophoca cinerea NC008419 1          | 0,18934898 |
| Vulpes zerdia KJ603240 1             | Prionailurus planiceps NC028312 6    | 0,18934956 |
| Nyctereutes procyonoides NC013700 3  | Martes foina NC020643 1              | 0,18935005 |
| Eumetopias jubatus NC004030 10       | Canis lupus familiaris NC002008 1231 | 0,18935126 |
| Lutrogale perspicillata NC035811 1   | Hyena hyaena NC020669 1              | 0,18935238 |
| Proteles cristata T393 6             | Enhydra lutris NC009692 1            | 0,18935315 |
| Mustela nigripes NC024942 1          | Crocuta crocuta NC020670 3           | 0,18935381 |
| Ursus maritimus GUS73488 Svalbard    | Cryptoprocta ferox CFC13 1           | 0,18935604 |
| Ursus thibetanus formosanus NC009333 | Ura javanica T413 1                  | 0,18935886 |
| Neofelis nebulosa NC008450 3         | Gulo gulo NC009685 3                 | 0,18936054 |
| Ursus thibetanus formosanus NC009333 | Galidia elegans D146 1               | 0,18936056 |
| Ursus maritimus NC003428 31          | Felis chaus NC028307 1               | 0,18936107 |
| Panthera onca NC022842 1             | Lutrogale perspicillata NC035811 1   | 0,18936312 |
| Ursus arctos AP012576 6              | Lutrogale perspicillata NC035811 1   | 0,18936317 |
| Speothos venaticus C48 2             | Profelis aurata NC028299 1           | 0,18936335 |
| Paguma larvata PDD511 2              | Galictis vittata T412 1              | 0,18936567 |
| Pardofelis marmorata NLN3 2          | Ailuropoda melanoleuca NC009492 5    | 0,18936621 |
| Ursus spelaeus EU327344 13           | Galierella sanguinea T378 1          | 0,18936896 |
| Zalophus wollebaeki SRR4431565 1     | Hyena hyaena NC020669 1              | 0,1893698  |
| Panthera leo spelaea KX258452 2      | Neovison vison NC020641 3            | 0,18937086 |
| Ursus maritimus NC003428 31          | Mephitis mephitis NC020648 1         | 0,18937191 |
| Melogale moschata V0735A 1           | Canis aureus KT448274 1              | 0,18937458 |
| Suricata suricatta SSM10 1           | Martes flavigula NC012141 3          | 0,18937658 |
| Melurus ursinus NC009970 2           | Lycaon pictus NC028427 2             | 0,18937685 |
| Ursus arctos AP012576 6              | Prionailurus rubiginosus NC028304 2  | 0,18937735 |
| Vulpes lagopus NC026529 3            | Panthera leo NERO 19                 | 0,18937807 |
| Cynictis penicillata T375 1          | Arctocepalus forsteri NC004023 28    | 0,18938185 |
| Ursus americanus JX196366 3          | Mungotictis decemlineata NC027828 1  | 0,18938233 |
| Zalophus californianus NC008416 1    | Hyena hyaena NC020669 1              | 0,18938297 |
| Panthera pardus NC010641 5           | Lutra lutra NC011358 9               | 0,18938665 |
| Cuon alpinus NC013445 3              | Crossarchus platycephalus C7R66 1    | 0,18938957 |
| Galidictis fasciata DM333 1          | Arctocepalus forsteri NC004023 28    | 0,18939036 |
| Panthera pardus NC010641 5           | Arctocepalus pusillus NC008417 1     | 0,18939216 |
| Prionailurus viverrinus NC028305 1   | Cuon alpinus NC013445 3              | 0,18939741 |
| Suricata suricatta SSM10 1           | Ailurus fulgens styani NC009691 1    | 0,18940313 |
| Lutrogale perspicillata NC035811 1   | Ura semitorquata MH464789 1          | 0,18940525 |
| Galidia elegans D146 1               | Canis latrans NC008093 7             | 0,1894062  |
| Procyon lotor AB462046 3             | Bdeogale nigripes GLC15 1            | 0,18940647 |
| Panthera tigris NC010642 35          | Martes flavigula NC012141 3          | 0,18940906 |
| Melogale moschata V0735A 1           | Cryptoprocta ferox CFC13 1           | 0,18941015 |
| Poecilogale albinucha T602 1         | Ura javanica T413 1                  | 0,18941174 |
| Ichneumia albicauda T603 1           | Bassaricyon neblina SRX1097850 1     | 0,1894128  |
| Panthera uncia KP202269 1            | Mustela itatsi NC034330 19           | 0,18941416 |
| Felis chaus NC028307 1               | Arctocepalus townsendi NC008420 1    | 0,18941468 |
| Mustela nivialis T306 5              | Galidia elegans D146 1               | 0,18941504 |
| Viverra zibetha T609 1               | Otocyon megalotis SAF1 2             | 0,18941565 |
| Viverra tangalunga MH464792 1        | Mustela altaica NC021751 1           | 0,18941572 |
| Nyctereutes procyonoides NC013700 3  | Martes zibellina NC011579 39         | 0,18941621 |
| Panthera onca KP202264 2             | Lontra canadensis SRR10409165 1      | 0,18941793 |
| Ursus maritimus NC003428 31          | Bassaricyon neblina SRX1097850 1     | 0,18941855 |

|                                       |                                       |            |
|---------------------------------------|---------------------------------------|------------|
| Procyon lotor AB462048 4              | Aonyx cinerea NC035814 2              | 0,1731106  |
| Salanoia concolor D378 1              | Cystophora cristata NC008427 1        | 0,17311099 |
| Profelis aurata NC028299 1            | Mirounga leonina NC008422 1           | 0,17311716 |
| Nandinia bionota NC024567 1           | Arctodus simus NC011116 1             | 0,17311829 |
| Lynx lynx NC027083 4                  | Cystophora cristata NC008427 1        | 0,17311877 |
| Phoca fasciata NC008428 1             | Lutrogale perspicillata NC035811 1    | 0,17311968 |
| Mirounga angustirostris SRR10331586 1 | Melogale moschata NC020644 1          | 0,17312053 |
| Mungotictis decemlineata NC027828 1   | Lobodon carcinophaga NC008423 1       | 0,17312486 |
| Monachus schauinslandi NC008421 1     | Leopardus pardalis NC028315 1         | 0,17312893 |
| Panthera pardus japonensis KJ866876 8 | Lobodon carcinophaga NC008423 1       | 0,17312998 |
| Prionailurus bengalensis CKM45 20     | Phoca groenlandica NC008429 54        | 0,17313233 |
| Zalophus californianus NC008416 1     | Mustela erminea T305 2                | 0,17313666 |
| Phoca fasciata NC008428 1             | Civettictis civetta NC033378 1        | 0,17315601 |
| Mustela eversmannii NC028013 1        | Mirounga leonina NC008422 1           | 0,17317162 |
| Mustela nigripes NC024942 1           | Bassaricyon neblina SRX1097850 1      | 0,17317172 |
| Mustela sibirica AP017394 11          | Aillurus fulgens NC011124 1           | 0,17317708 |
| Pusa sibirica NC008432 2              | Lynx pardinus NC028319 161            | 0,17318803 |
| Pusa hispida NC 008433 1              | Felis nigripes NC028309 1             | 0,17319787 |
| Smilodon populator MF871700 1         | Monachus schauinslandi NC008421 1     | 0,17320918 |
| Monachus monachus NC004972 5          | Martes martes T302 3                  | 0,17321379 |
| Mirounga leonina NC008422 1           | Lutra lutra NC011358 9                | 0,17322952 |
| Lutra lutra LC050126 1                | Aillurus fulgens NC011124 1           | 0,17322969 |
| Martes americana NC020642 1           | Aillurus fulgens styani NC009691 1    | 0,17324117 |
| Monachus monachus NC004972 5          | Gulo gulo NC009685 3                  | 0,17324398 |
| Mirounga leonina NC008422 1           | Lynx rufus NC014456 3                 | 0,17325011 |
| Phoca fasciata NC008428 1             | Eupleres goudotii D128 1              | 0,17325103 |
| Pusa sibirica NC008432 2              | Mustela altaica NC021751 1            | 0,17325194 |
| Pardofelis marmorata NLN3 2           | Erigonathus barbatus NC008426 1       | 0,17325316 |
| Felis nigripes NC028309 1             | Erigonathus barbatus NC008426 1       | 0,17325333 |
| Lobodon carcinophaga NC008423 1       | Attila paludinosus T606 1             | 0,173254   |
| Lobodon carcinophaga NC008423 1       | Canis anthus NC027956 2               | 0,17325617 |
| Pusa sibirica NC008432 2              | Prionailurus rubiginosus NC028304 2   | 0,17325644 |
| Prionailurus planiceps KY682741 4     | Phoca groenlandica NC008429 54        | 0,17326294 |
| Prionailurus rubiginosus NC028304 2   | Phoca groenlandica NC008429 54        | 0,17326358 |
| Pusa hispida NC 008433 1              | Leopardus guigna NC028321 1           | 0,17326683 |
| Lobodon carcinophaga NC008423 1       | Chrysoyon brachyurus NC024172 1       | 0,17327124 |
| Mephitis mephitis NC020648 1          | Hydrurga leptonyx NC008425 1          | 0,17327248 |
| Monachus monachus NC004972 5          | Melogale moschata NC020644 1          | 0,17327936 |
| Leptonyx chotes weddellii NC008424 1  | Canis lupus chanco NC010340 4         | 0,17328453 |
| Callorhinus ursinus NC008415 1        | Arctonyx collaris NC020645 1          | 0,17330128 |
| Cystophora cristata NC008427 1        | Aillurus fulgens NC011124 1           | 0,17331018 |
| Mirounga leonina NC008422 1           | Lynx canadensis NC028313 1            | 0,17331733 |
| Ichonyx striatus T299 1               | Erigonathus barbatus NC008426 1       | 0,17332034 |
| Procyon lotor AB462046 3              | Phoca largha NC008430 1               | 0,17332375 |
| Viverricula indica XK891745 1         | Phoca vitulina NC001325 1             | 0,17333111 |
| Monachus schauinslandi NC008421 1     | Leopardus wiedii NC028318 1           | 0,17333312 |
| Puma yagouaroundi NC028311 1          | Phoca groenlandica NC008429 54        | 0,17333122 |
| Panthera onca KP202264 2              | Lobodon carcinophaga NC008423 1       | 0,17333196 |
| Pusa hispida NC 008433 1              | Felis silvestris lybica KP202275 4    | 0,17333259 |
| Puma yagouaroundi NC028311 1          | Mirounga angustirostris SRR10331586 1 | 0,17333329 |
| Viverra zibetha T609 1                | Mirounga angustirostris SRR10331586 1 | 0,17333354 |
| Prionailurus viverrinus NC028305 1    | Phoca largha NC008430 1               | 0,17333917 |
| Procyon lotor AB462046 3              | Halichoerus grypus NC001602 2         | 0,17336136 |
| Prionailurus bengalensis CKM45 20     | Halichoerus grypus NC001602 2         | 0,17337641 |
| Melogale moschata NC020644 1          | Aillurus fulgens styani NC009691 1    | 0,17338049 |
| Panthera uncia KP202269 1             | Leptonyx chotes weddellii NC008424 1  | 0,17338623 |
| Pusa caspica NC008431 1               | Hemigalus derbyanus MH464791 1        | 0,17338628 |
| Spilogale putorius NC010497 1         | Monachus monachus NC004972 5          | 0,17338711 |
| Monachus schauinslandi NC008421 1     | Crossarchus platycephalus C7R66 1     | 0,17338718 |
| Pusa sibirica NC008432 2              | Genetta abyssinica MG489822 1         | 0,1733886  |
| Phoca vitulina NC001325 1             | Aillurus fulgens NC011124 1           | 0,17338867 |
| Mirounga leonina NC008422 1           | Leopardus geoffroyi NC028320 1        | 0,17338964 |
| Pusa sibirica NC008432 2              | Felis silvestris lybica KP202275 4    | 0,17339043 |
| Pusa sibirica NC008432 2              | Prionailurus planiceps KY682741 4     | 0,17339078 |
| Pusa hispida NC 008433 1              | Bassaricyon neblina SRX1097850 1      | 0,17339078 |
| Hyaena hyaena NC020669 1              | Cystophora cristata NC008427 1        | 0,17339164 |
| Mustela altaica NC021751 1            | Monachus schauinslandi NC008421 1     | 0,17339469 |
| Monachus monachus NC004972 5          | Chrotogale owstoni T607 1             | 0,17339637 |
| Prionailurus rubiginosus NC028304 2   | Monachus schauinslandi NC008421 1     | 0,1733973  |
| Viverricula indica XK891745 1         | Phoca vitulina NC001325 1             | 0,17339809 |
| Mirounga angustirostris SRR10331586 1 | Leopardus pardalis NC028315 1         | 0,17339988 |
| Mirounga angustirostris SRR10331586 1 | Genetta servalina NC024568 2          | 0,17340261 |
| Procyon lotor AB462049 4              | Monachus monachus NC004972 5          | 0,17341609 |
| Taxidea taxus NC020646 1              | Eumetopias jubatus NC004030 10        | 0,1734179  |
| Monachus monachus NC004972 5          | Catopuma temminckii NC027115 41       | 0,17341961 |
| Hydrurga leptonyx NC008425 1          | Canis lupus chanco NC010340 4         | 0,17342629 |
| Nandinia bionota NC024567 1           | Martes americana NC020642 1           | 0,17344168 |
| Mungos mungo MIMC7 1                  | Mirounga leonina NC008422 1           | 0,17344581 |
| Mustela sibirica NC020637 6           | Aillurus fulgens NC011124 1           | 0,17344639 |
| Felis chaus NC028307 1                | Erigonathus barbatus NC008426 1       | 0,17345566 |
| Puma concolor NC016470 22             | Erigonathus barbatus NC008426 1       | 0,17345566 |
| Zalophus wolfebaeki SRR4431565 1      | Taxidea taxus NC020646 1              | 0,17346695 |
| Ommatophoca rossi AY377287etc 1       | Martes melampus NC009678 1            | 0,17346765 |
| Poecilogale albinucha T602 1          | Mirounga angustirostris SRR10331586 1 | 0,17346993 |
| Taxidea taxus NC020646 1              | Hemigalus derbyanus MH464791 1        | 0,1734793  |
| Panthera pardus NC010641 5            | Lobodon carcinophaga NC008423 1       | 0,17349979 |
| Lynx canadensis NC028313 1            | Halichoerus grypus NC001602 2         | 0,17350806 |
| Pusa sibirica NC008432 2              | Procyon lotor AB462049 4              | 0,17351437 |
| Procyon lotor AB462046 3              | Aonyx cinerea NC035814 2              | 0,17351449 |
| Viverricula indica XK891745 1         | Pusa caspica NC008431 1               | 0,17352079 |
| Phoca fasciata NC008428 1             | Mungos mungo/gambianus SRR7704821 1   | 0,17352186 |
| Suricata suricatta SSM10 1            | Lobodon carcinophaga NC008423 1       | 0,17352241 |
| Mirounga leonina NC008422 1           | Leopardus guigna NC028321 1           | 0,17352436 |
| Phoca largha NC008430 1               | Hemigalus derbyanus MH464791 1        | 0,17352666 |
| Paguma larvata PDD511 2               | Lobodon carcinophaga NC008423 1       | 0,17352855 |
| Mirounga angustirostris SRR10331586 1 | Lynx lynx NC027083 4                  | 0,17353112 |
| Monachus schauinslandi NC008421 1     | Leptailurus serval NC028316 1         | 0,17353198 |
| Viverricula indica XK891745 1         | Phoca largha NC008430 1               | 0,17353255 |
| Lycaon pictus NC028427 2              | Hydrurga leptonyx NC008425 1          | 0,17353436 |
| Mirounga angustirostris SRR10331586 1 | Leptailurus serval NC028316 1         | 0,17353556 |
| Mirounga leonina NC008422 1           | Acinonyx jubatus NC005212 3           | 0,17353652 |
| Poecilogale albinucha T602 1          | Phoca vitulina NC001325 1             | 0,17354028 |
| Ursus arctos pruinosus MG066703 3     | Mirounga angustirostris SRR10331586 1 | 0,17354418 |

|                                        |                                      |            |
|----------------------------------------|--------------------------------------|------------|
| Melogale moschata KP276273 1           | Crocota crocata NC020670 3           | 0,18941878 |
| Zalophus wolfebaeki SRR4431565 1       | Vulpes lagopus NC026529 3            | 0,18941881 |
| Ursus maritimus NC003428 31            | Canis latrans NC008093 7             | 0,18941927 |
| Procyon lotor AB462049 4               | Parahyaena brunnea NC038159 15       | 0,18941984 |
| Profelis aurata NC028299 1             | Phocarcotus hroki NC008418 1         | 0,18942028 |
| Nyctereutes procyonoides NC013700 3    | Ichonyx striatus T299 1              | 0,18942249 |
| Crocota crocata NC020670 3             | Arctocepalus pusillus NC008417 1     | 0,18942291 |
| Prionodon pardicolor NC024569 2        | Poecilogale albinucha T602 1         | 0,18942353 |
| Panthera tigris NC010642 35            | Canis anthus NC027956 2              | 0,18942563 |
| Ursus arctos isabellinus 1885 2        | Prionodon pardicolor NC024569 2      | 0,18942586 |
| Ursus arctos isabellinus 1885 2        | Panthera pardus japonensis KJ866876  | 0,18942596 |
| Ursus maritimus NC003428 31            | Prionailurus planiceps NC028312 6    | 0,18942799 |
| Gulo gulo NC009685 3                   | Cuon alpinus NC013445 3              | 0,18942817 |
| Panthera onca NC022842 1               | Lontra canadensis SRR10409165 1      | 0,1894284  |
| Ursus arctos EU497665 29               | Felis chaus NC028307 1               | 0,18942843 |
| Ursus arctos GUS73486 5                | Ichneumia albicauda T603 1           | 0,18943164 |
| Ursus spelaeus NC011112 8              | Canis latrans NC008093 7             | 0,18943293 |
| Zalophus californianus NC008416 1      | Vulpes zerda KJ603240 1              | 0,18943319 |
| Ursus arctos GUS73486 5                | Felis silvestris lybica KP202275 4   | 0,18943396 |
| Ursus arctos GUS73486 5                | Felis chaus NC028307 1               | 0,18943465 |
| Parahyaena brunnea NC038159 15         | Melursus ursinus NC009970 2          | 0,1894362  |
| Hyaena hyaena NC020669 1               | Galictis vittata T412 1              | 0,18943821 |
| Procyon lotor AB462046 3               | Canis aureus KT448274 1              | 0,18943843 |
| Ursus thibetanus thibetanus NC011118 1 | Parahyaena brunnea NC038159 15       | 0,18943924 |
| Panthera onca KP202264 2               | Galictis vittata T412 1              | 0,18943949 |
| Prionodon pardicolor NC024569 2        | Melursus ursinus NC009970 2          | 0,18943989 |
| Pardofelis marmorata NLN3 2            | Melursus ursinus NC009970 2          | 0,18944132 |
| Ursus thibetanus mupinensis NC00875 1  | Chrysoyon brachyurus NC024172 1      | 0,18944244 |
| Ursus arctos AP012576 6                | Lynx pardinus NC028319 161           | 0,18944339 |
| Ursus americanus JX196366 3            | Mungos mungo/gambianus SRR77048 1    | 0,18944471 |
| Ursus arctos isabellinus 1885 2        | Diplogale hosei MH464790 1           | 0,189447   |
| Ursus arctos EU497665 29               | Canis lupus familiaris NC002008 1231 | 0,18945476 |
| Cuon alpinus NC013445 3                | Arctotherium sp NC030174 1           | 0,1894563  |
| Ursus thibetanus mupinensis NC00875 1  | Canis mesomelas KT448280 1           | 0,18945834 |
| Prionodon linsang ERR2391707 1         | Lutra lutra NC011358 9               | 0,18945843 |
| Tremarctos ornatus NC009969 2          | Urva javanica/auropunctata NC006835  | 0,18945956 |
| Neofelis nebulosa NC008450 3           | Bassariscus sumichrasti SRX1099089 1 | 0,18946108 |
| Suricata suricatta SSM10 1             | Lutra lutra NC011358 9               | 0,18946123 |
| Paradoxurus hermaphroditus NC03959 1   | Lutra lutra LC050126 1               | 0,1894628  |
| Panthera uncia NC010638 1              | Eumetopias jubatus NC004030 10       | 0,18946475 |
| Mustela itatsi NC034330 19             | Helogale parvula SRR7637809 1        | 0,18946843 |
| Urva javanica T413 1                   | Arctocepalus forsteri KT693377 17    | 0,18946846 |
| Vulpes ferrilata NC027935 1            | Martes melampus NC009678 1           | 0,18946911 |
| Vulpes corsac NC023958 1               | Martes zibellina NC011579 39         | 0,18946923 |
| Urva brachyura KY117547 1              | Arctocepalus gazella BK010918 1      | 0,18946955 |
| Vulpes lagopus NC026529 3              | Attila paludinosus T606 1            | 0,18947028 |
| Urva javanica T413 1                   | Aillurus fulgens NC011124 1          | 0,18947084 |
| Vulpes corsac NC023958 1               | Tremarctos ornatus NC009969 2        | 0,18947102 |
| Xenogale naso C07XAR110 1              | Arctocepalus gazella BK010918 1      | 0,18947114 |
| Cynictis penicillata T375 1            | Aillurus fulgens styani NC009691 1   | 0,18947119 |
| Mustela sibirica NC020637 6            | Galidia elegans D146 1               | 0,18947317 |
| Vulpes lagopus NC026529 3              | Mustela putorius NC020638 4          | 0,18947323 |
| Vulpes lagopus NC026529 3              | Chrotogale owstoni T607 1            | 0,18947402 |
| Mungotictis decemlineata NC027828 1    | Arctocepalus forsteri KT693377 17    | 0,18947405 |
| Galidia elegans D146 1                 | Arctocepalus australis MG023139 1    | 0,18947423 |
| Panthera uncia KP202269 1              | Aillurus fulgens NC011124 1          | 0,18947726 |
| Vulpes lagopus NC026529 3              | Arctotherium sp NC030174 1           | 0,18947813 |
| Ursus maritimus GUS73488 Svalbard      | Helogale parvula SRR7637809 1        | 0,18948178 |
| Vulpes ferrilata NC027935 1            | Genetta genetta T297 1               | 0,18948199 |
| Vulpes lagopus NC026529 3              | Panthera uncia NC010638 1            | 0,18948254 |
| Panthera onca KP202264 2               | Arctocepalus forsteri KT693377 17    | 0,18948257 |
| Vulpes zerda KJ603240 1                | Genetta genetta T297 1               | 0,18948281 |
| Panthera onca KP202264 2               | Martes americana NC020642 1          | 0,18948303 |
| Melursus ursinus NC009970 2            | Conepatus chinga NC022596 1          | 0,18948404 |
| Panthera uncia KP202269 1              | Lontra canadensis SRR10409165 1      | 0,18948467 |
| Vulpes zerda KJ603240 1                | Parahyaena brunnea NC038159 15       | 0,18948476 |
| Urocyon cinereoargenteus NC026723 2    | Leopardus pardalis T262 1            | 0,18948486 |
| Panthera tigris NC010642 35            | Aillurus fulgens NC011124 1          | 0,18948521 |
| Parahyaena brunnea NC038159 15         | Nyctereutes procyonoides NC013700 3  | 0,18948549 |
| Urocyon littoralis catalinae KP129018  | Neowison vison NC020641 3            | 0,18948632 |
| Poecilogale albinucha T602 1           | Galidictis fasciata DM333 1          | 0,18948701 |
| Procyon lotor AB462049 4               | Mustela sibirica NC020637 6          | 0,18948999 |
| Zalophus wolfebaeki SRR4431565 1       | Paradoxurus hermaphroditus NC03959 1 | 0,18949081 |
| Ursus thibetanus laniger MH281753 2    | Xenogale naso C07XAR110 1            | 0,18949288 |
| Ursus arctos GUS73486 5                | Canis latrans NC008093 7             | 0,18949297 |
| Ursus thibetanus mupinensis NC00875 1  | Parahyaena brunnea NC038159 15       | 0,18949361 |
| Ursus arctos isabellinus 1885 2        | Felis catus NC001700 2               | 0,18949431 |
| Ursus spelaeus NC011112 8              | Bdeogale nigripes GLC15 1            | 0,18949459 |
| Ursus thibetanus laniger MH281753 2    | Galidia elegans D146 1               | 0,18949509 |
| Speothos venaticus C48 2               | Martes pennanti NC020664 16          | 0,18949549 |
| Ursus arctos pruinosus MG066703 3      | Felis margarita NC028308 1           | 0,18949552 |
| Ursus americanus JX196366 3            | Panthera leo NERO 19                 | 0,18949561 |
| Ichonyx striatus T299 1                | Hyaena hyaena NC020669 1             | 0,18949758 |
| Panthera tigris NC010642 35            | Otaria byronia OTAB 1                | 0,18949847 |
| Ursus arctos GUS73486 5                | Prionailurus planiceps NC028312 6    | 0,18950163 |
| Puma yagouaroundi NC028311 1           | Ailluropoda melanoleuca NC009492 5   | 0,18950309 |
| Panthera tigris amoyensis NC014770 2   | Martes foina NC020643 1              | 0,18950585 |
| Ursus maritimus GUS73488 Svalbard      | Mephitis mephitis NC020648 1         | 0,18950668 |
| Zalophus wolfebaeki SRR4431565 1       | Canis aureus KT448274 1              | 0,18950991 |
| Zalophus californianus NC008416 1      | Otocyon megalotis SAF 2              | 0,18951041 |
| Ichonyx striatus T299 1                | Canis aureus KT448274 1              | 0,18951249 |
| Cynictis penicillata T375 1            | Cuon alpinus NC013445 3              | 0,18951547 |
| Lontra canadensis SRR10409165 1        | Canis lupus chanco NC010340 4        | 0,18951567 |
| Vulpes lagopus NC026529 3              | Gulo gulo NC009685 3                 | 0,18951568 |
| Nasua nasua NC020647 1                 | Eumetopias jubatus NC004030 10       | 0,18952234 |
| Mephitis mephitis NC020648 1           | Chrysoyon brachyurus NC024172 1      | 0,18952242 |
| Spilogale putorius NC010497 1          | Lynx pardinus NC028319 161           | 0,18952911 |
| Spilogale putorius NC010497 1          | Prionailurus bengalensis CKM45 20    | 0,18953118 |
| Mephitis mephitis NC020648 1           | Urva javanica/auropunctata NC006835  | 0,18953383 |
| Canis lupus familiaris NC002008 1231   | Ailluropoda melanoleuca NC009492 5   | 0,18953539 |
| Vulpes lagopus NC026529 3              | Enhydra lutris NC009692 1            | 0,18953553 |
| Vulpes vulpes NC008434 5               | Urva javanica T413 1                 | 0,1895368  |
| Galidictis fasciata DM333 1            | Bassaricyon neblina SRX1097850 1     | 0,18953773 |

|                                       |                                       |            |
|---------------------------------------|---------------------------------------|------------|
| Monachus monachus NC044972 5          | Fossa fossana D350 1                  | 0,17354715 |
| Mirounga leonina NC008422 1           | Civettictis civetta NC033378 1        | 0,17355949 |
| Nandinia binotata NC024567 1          | Canis adustus KT448271 1              | 0,17356104 |
| Viverricula indica KX891751 1         | Halichoerus grypus NC001602 2         | 0,17356764 |
| Prionailurus bengalensis NC028301 12  | Halichoerus grypus NC001602 2         | 0,17357506 |
| Nandinia binotata NC024567 1          | Mustela eversmannii NC028013 1        | 0,17357577 |
| Nandinia binotata NC024567 1          | Mustela itatsi NC034330 19            | 0,17357661 |
| Lobodon carcinophaga NC008423 1       | Urva brachyura KY117547 1             | 0,17358921 |
| Phoca largha NC008430 1               | Ailurus fulgens NC011124 1            | 0,17359047 |
| Cystophora cristata NC008427 1        | Cryptoprocta ferox CFC13 1            | 0,17359065 |
| Lobodon carcinophaga NC008423 1       | Eupleres goudotii D128 1              | 0,17359208 |
| Pusa sibirica NC008432 2              | Leopardus jacobita NC028322 1         | 0,17359552 |
| Pusa hispida NC 008433 1              | Civettictis civetta GLC19 1           | 0,17359801 |
| Ommatophoca rossii AY377287etc 1      | Leopardus pardalis T262 1             | 0,17359582 |
| Viverricula indica KX891745 1         | Phoca largha NC008430 1               | 0,17360023 |
| Phoca groenlandica NC008429 54        | Leptailurus serval NC028316 1         | 0,17360064 |
| Phoca largha NC008430 1               | Leopardus geoffroyi NC028320 1        | 0,17360793 |
| Pusa hispida NC 008433 1              | Ailuropoda melanoleuca NC009492 5     | 0,17361057 |
| Panthera tigris amoyensis NC014770 2  | Hydrurga leptonyx NC008425 1          | 0,17361175 |
| Ommatophoca rossii AY377287etc 1      | Gulo gulo NC009685 3                  | 0,17361777 |
| Procyon lotor AB462049 4              | Halichoerus grypus NC001602 2         | 0,17363058 |
| Martes melampus NC009678 1            | Ailurus fulgens NC011124 1            | 0,17363934 |
| Nandinia binotata NC024567 1          | Lutra sumatrana NC035810 1            | 0,17363951 |
| Mustela eversmannii NC028013 1        | Ailurus fulgens NC011124 1            | 0,17364807 |
| Phoca fasciata NC008428 1             | Chrotogale owstoni T607 1             | 0,17365013 |
| Prionailurus bengalensis NC028301 12  | Ommatophoca rossii AY377287etc 1      | 0,17365293 |
| Mirounga leonina NC008422 1           | Felis chaus NC028307 1                | 0,17365529 |
| Panthera pardus japonensis KJ866876 8 | Leptonyx chotes weddellii NC008424 1  | 0,17365555 |
| Paguma larvata PDD511 2               | Mirounga leonina NC008422 1           | 0,17365612 |
| Mirounga leonina NC008422 1           | Genetta genetta T297 1                | 0,17365839 |
| Otocolobus manul NC028323 1           | Cystophora cristata NC008427 1        | 0,17365983 |
| Viverra zibetha T609 1                | Canis adustus KT448271 1              | 0,1736626  |
| Phoca largha NC008430 1               | Lutrogale perspicillata NC035811 1    | 0,17366344 |
| Pusa hispida NC 008433 1              | Prionailurus rubiginosus NC028304 2   | 0,17366874 |
| Prionailurus rubiginosus NC028304 2   | Mirounga angustirostris SRR10331586 1 | 0,17366904 |
| Profelis aurata NC028299 1            | Mirounga angustirostris SRR10331586 1 | 0,17366987 |
| Prionailurus viverrinus NC028305 1    | Mirounga angustirostris SRR10331586 1 | 0,17367071 |
| Ommatophoca rossii AY377287etc 1      | Mustela kathiah NC023210 1            | 0,17367394 |
| Smilodon populator MF871700 1         | Pusa sibirica NC008432 2              | 0,17367463 |
| Viverra zibetha T609 1                | Monachus monachus NC044972 5          | 0,17368786 |
| Mirounga angustirostris SRR10331586 1 | Diplogale hoesi MH464790 1            | 0,17369003 |
| Phoca largha NC008430 1               | Canis adustus KT448271 1              | 0,17369874 |
| Nandinia binotata NC024567 1          | Lutra lutra NC011358 9                | 0,17370407 |
| Monachus monachus NC044972 5          | Leopardus colocolo NC028314 1         | 0,17370883 |
| Suricata suricatta SSM10 1            | Hydrurga leptonyx NC008425 1          | 0,17372452 |
| Phoca fasciata NC008428 1             | Mungos mungo MMC7 1                   | 0,17372544 |
| Erigonathus barbatus NC008426 1       | Cryptoprocta ferox CFC13 1            | 0,17372561 |
| Salanoia concolor D378 1              | Phoca fasciata NC008428 1             | 0,17372614 |
| Monachus schauinslandi NC008421 1     | Lynx lynx NC027083 4                  | 0,17373389 |
| Monachus schauinslandi NC008421 1     | Aonyx cinerea NC035814 2              | 0,17373398 |
| Prionailurus planiceps NC028312 6     | Phoca groenlandica NC008429 54        | 0,17373426 |
| Pusa hispida NC 008433 1              | Leopardus tigrinus NC028317 1         | 0,17373833 |
| Viverricula indica NC025296 2         | Neovison wison NC020641 3             | 0,1737427  |
| Nandinia binotata NC024567 1          | Gulo gulo NC009685 3                  | 0,17374432 |
| Mirounga angustirostris SRR10331586 1 | Acinonyx jubatus NC005212 3           | 0,17375255 |
| Smilodon populator MF871700 1         | Phoca groenlandica NC008429 54        | 0,17376299 |
| Spilogale putorius NC010497 1         | Neovison wison NC020641 3             | 0,17376843 |
| Cystophora cristata NC008427 1        | Chrotogale owstoni T607 1             | 0,17377576 |
| Mungos mungo/gambianus SRR7704821 1   | Mirounga leonina NC008422 1           | 0,17378131 |
| Urva brachyura KY117547 1             | Cystophora cristata NC008427 1        | 0,17378131 |
| Xenogale naso C07XAR110 1             | Erigonathus barbatus NC008426 1       | 0,17378131 |
| Nandinia binotata NC024567 1          | Martes martes T302 3                  | 0,17378257 |
| Pusa sibirica NC008432 2              | Procyon lotor AB462046 3              | 0,173784   |
| Lutrogale perspicillata NC035811 1    | Cystophora cristata NC008427 1        | 0,1737849  |
| Otaria byronia OTAB 1                 | Mustela erminea T305 2                | 0,17378774 |
| Paguma larvata PDD511 2               | Erigonathus barbatus NC008426 1       | 0,17379047 |
| Phoca groenlandica NC008429 54        | Mustela altaica NC021751 1            | 0,17379773 |
| Poecilogale albinucha T602 1          | Monachus schauinslandi NC008421 1     | 0,1738027  |
| Pusa hispida NC 008433 1              | Otocolobus manul NC028323 1           | 0,17380346 |
| Monachus monachus NC044972 5          | Conepatus chinga NC042596 1           | 0,17380719 |
| Mustela nivalis T306 5                | Monachus monachus NC044972 5          | 0,17382288 |
| Panthera leo NERO 19                  | Lobodon carcinophaga NC008423 1       | 0,17383493 |
| Xenogale naso C07XAR110 1             | Cystophora cristata NC008427 1        | 0,17384864 |
| Taxidea taxus NC020646 1              | Arctocepalus pusillus NC008417 1      | 0,17385735 |
| Phoca largha NC008430 1               | Bassaricyon neblina SRX1097850 1      | 0,17385989 |
| Pusa sibirica NC008432 2              | Hemigale derbyanus MH464791 1         | 0,17386249 |
| Pusa caspica NC008431 1               | Poecilogale albinucha T602 1          | 0,17386484 |
| Phoca fasciata NC008428 1             | Felis nigripes NC028309 1             | 0,17386822 |
| Pusa hispida NC 008433 1              | Caracal caracal NC028306 1            | 0,1738717  |
| Mirounga angustirostris SRR10331586 1 | Civettictis civetta GLC19 1           | 0,17387392 |
| Prionailurus viverrinus NC028305 1    | Phoca vitulina NC001325 1             | 0,17387772 |
| Monachus monachus NC044972 5          | Leptailurus serval NC028316 1         | 0,17389062 |
| Spilogale putorius NC010497 1         | Meles leucurus NC039173 4             | 0,17389581 |
| Hydrurga leptonyx NC008425 1          | Canis aureus KT448274 1               | 0,17389688 |
| Puma concolor NC016470 22             | Halichoerus grypus NC001602 2         | 0,17391184 |
| Pusa sibirica NC008432 2              | Lutrogale perspicillata NC035811 1    | 0,17391925 |
| Cynogale bennetti KY117544 1          | Cryptoprocta ferox CFC13 1            | 0,17392257 |
| Lobodon carcinophaga NC008423 1       | Urva javanica T413 1                  | 0,17392667 |
| Mungos mungo/gambianus SRR7704821 1   | Mirounga angustirostris SRR10331586 1 | 0,17392826 |
| Pusa caspica NC008431 1               | Felis silvestris lybica KP202275 4    | 0,17392911 |
| Pusa caspica NC008431 1               | Prionailurus bengalensis CKM45 20     | 0,17393333 |
| Profelis aurata NC028299 1            | Monachus schauinslandi NC008421 1     | 0,17393343 |
| Puma concolor NC016470 22             | Monachus schauinslandi NC008421 1     | 0,17393586 |
| Phoca groenlandica NC008429 54        | Leopardus tigrinus NC028317 1         | 0,17393793 |
| Phoca vitulina NC001325 1             | Genetta servalina NC024568 2          | 0,17393798 |
| Puma concolor NC016470 22             | Mirounga angustirostris SRR10331586 1 | 0,17393807 |
| Mirounga angustirostris SRR10331586 1 | Caracal caracal NC028306 1            | 0,17393926 |
| Phoca vitulina NC001325 1             | Leopardus geoffroyi NC028320 1        | 0,17394471 |
| Mustela sibirica NC020637 6           | Monachus monachus NC044972 5          | 0,17394678 |
| Homotherium latidens MF871702 3       | Ailurus fulgens NC011124 1            | 0,17395106 |
| Monachus schauinslandi NC008421 1     | Genetta abyssinica MG489822 1         | 0,17395465 |
| Monachus monachus NC044972 5          | Leopardus wiedii NC028318 1           | 0,17395602 |
| Panthera pardus NC010641 5            | Hydrurga leptonyx NC008425 1          | 0,17397168 |

|                                      |                                      |            |
|--------------------------------------|--------------------------------------|------------|
| Spilogale putorius NC010497 1        | Acinonyx jubatus NC005212 3          | 0,18953818 |
| Neophoca cinerea NC008419 1          | Nasua nasua NC020647 1               | 0,18953902 |
| Odobenus rosmarus NC004029 29        | Gulo gulo NC009685 3                 | 0,18954003 |
| Melogale moschata NC020644 1         | Urva brachyura KY117547 1            | 0,1895414  |
| Panthera onca KP202264 2             | Ailurus fulgens NC011124 1           | 0,18954429 |
| Procyon lotor AB462049 4             | Canis anthus NC027956 2              | 0,18954469 |
| Speothos venaticus C48 2             | Ommatophoca rossii AY377287etc 1     | 0,18954492 |
| Otaria byronia OTAB 1                | Urva javanica T413 1                 | 0,18954554 |
| Panthera pardus japonensis KJ866876  | Callorhinus ursinus NC008415 1       | 0,18954661 |
| Panthera uncia KP202269 1            | Arctocepalus forsteri KT693377 17    | 0,18954973 |
| Vulpes ferrilata NC027935 1          | Panthera onca KP202264 2             | 0,18954979 |
| Pardofelis marmorata NLN3 2          | Arctocepalus australis MG023139 1    | 0,18955013 |
| Galidictis fasciata DM333 1          | Arctotherium sp NC030174 1           | 0,18955074 |
| Martes zibellina NC011579 39         | Chrysocyon brachyurus NC024172 1     | 0,18955332 |
| Odobenus rosmarus NC004029 29        | Meles anakuma NC009677 1             | 0,18955481 |
| Viverra tangalunga MH464792 1        | Crocota crocata NC020670 3           | 0,18955588 |
| Proteles cristata T393 6             | Mustela sibirica AP017394 11         | 0,18955711 |
| Panthera uncia NC010638 1            | Melogale moschata NC020644 1         | 0,18955784 |
| Ursus maritimus NC003428 31          | Cryptoprocta ferox CFC13 1           | 0,18955803 |
| Panthera tigris amoyensis NC014770 2 | Mustela nigripes NC024942 1          | 0,18955848 |
| Conepatus chinga NC042596 1          | Canis aureus KT448274 1              | 0,1895591  |
| Prionailurus planiceps NC028312 6    | Otocyon megalotis SAF1 2             | 0,18955976 |
| Panthera uncia KP202269 1            | Martes martes T302 3                 | 0,18955988 |
| Vulpes ferrilata NC027935 1          | Helarctos malayanus NC009968 2       | 0,18956013 |
| Ursus thibetanus formosanus NC0093   | Mungos mungo/gambianus SRR77048      | 0,18956104 |
| Ursus arctos EU497665 29             | Panthera uncia KP202269 1            | 0,18956125 |
| Lutra sumatrana NC035810 1           | Canis mesomelas KT448280 1           | 0,18956131 |
| Ursus spelaeus EU327344 13           | Mungos mungo MMC7 1                  | 0,1895624  |
| Speothos venaticus C48 2             | Leopardus tigrinus NC028317 1        | 0,18956243 |
| Speothos venaticus C48 2             | Mustela nivalis T306 5               | 0,18956296 |
| Ursus arctos isabellinus 1885 2      | Otocolobus manul NC028323 1          | 0,18956332 |
| Ursus spelaeus EU327344 13           | Galidia elegans D146 1               | 0,18956523 |
| Panthera tigris amoyensis NC014770 2 | Otaria byronia OTAB 1                | 0,18956609 |
| Melogale moschata V0735A 1           | Lycalopex sechurae KT448284 1        | 0,18956678 |
| Procyon lotor AB462046 3             | Panthera leo spelaea KX258452 2      | 0,18956849 |
| Mephitis mephitis NC008093 7         | Canis latrans NC008093 7             | 0,18956859 |
| Ictonyx striatus T299 1              | Crocota crocata NC020670 3           | 0,18956934 |
| Ursus spelaeus EU327344 13           | Panthera pardus japonensis KJ866876  | 0,18957102 |
| Ursus spelaeus EU327344 13           | Paradoxurus hermaphroditus NC03959   | 0,18957257 |
| Gulo gulo NC009685 3                 | Attilax paludinosus T606 1           | 0,18957706 |
| Lutrogale sechurae KT448284 1        | Eumetopias jubatus NC004030 10       | 0,18957868 |
| Neofelis nebulosa NC008450 3         | Meles leucurus NC039173 4            | 0,18958127 |
| Panthera onca KP202264 2             | Canis mesomelas KT448280 1           | 0,18958215 |
| Panthera leo NERO 19                 | Meles anakuma NC009677 1             | 0,18958247 |
| Xenogale naso C07XAR110 1            | Arctocepalus forsteri NC004023 28    | 0,18958497 |
| Ursus arctos GU573491 207            | Canis lupus familiaris NC002008 1231 | 0,18958931 |
| Spilogale putorius NC010497 1        | Prionailurus planiceps KY682741 4    | 0,18958984 |
| Pardofelis marmorata NLN3 2          | Cuon alpinus NC013445 3              | 0,18959381 |
| Ursus arctos GU573491 207            | Canis lupus familiaris NC002008 1231 | 0,1895957  |
| Panthera leo NERO 19                 | Martes foina NC020643 1              | 0,18959606 |
| Lycalopex sechurae KT448284 1        | Ailuropoda melanoleuca NC009492 5    | 0,18959735 |
| Ursus spelaeus NC011112 8            | Diplogale hoesi MH464790 1           | 0,18960035 |
| Vulpes lagopus NC026529 3            | Lutra lutra LC050126 1               | 0,18960114 |
| Vulpes corsac NC023958 1             | Eupleres goudotii D128 1             | 0,18960179 |
| Vulpes vulpes NC008434 5             | Eupleres goudotii D128 1             | 0,18960203 |
| Prionodon linsang ERR2391707 1       | Martes americana NC020642 1          | 0,18960425 |
| Tremarctos ornatus NC009969 2        | Attilax paludinosus T606 1           | 0,18960433 |
| Tremarctos ornatus NC009969 2        | Urva brachyura KY117547 1            | 0,18960503 |
| Ursus arctos GU573491 207            | Urva javanica T413 1                 | 0,18960646 |
| Ursus arctos GU573491 207            | Conepatus chinga NC042596 1          | 0,18960716 |
| Vulpes zerdia KJ603240 1             | Mustela eversmannii NC028013 1       | 0,18960851 |
| Proteles cristata T393 6             | Martes flavigula NC012141 3          | 0,1896086  |
| Suricata suricatta SSM10 1           | Melogale moschata NC020644 1         | 0,18960878 |
| Martes pennanti NC020664 16          | Urva brachyura KY117547 1            | 0,1896092  |
| Otaria byronia OTAB 1                | Helogale parvula SRR7637809 1        | 0,18960924 |
| Nasua nasua NC020647 1               | Ailurus fulgens NC011124 1           | 0,18961018 |
| Otaria byronia OTAB 1                | Nasua nasua NC020647 1               | 0,18961181 |
| Otocyon megalotis SAF1 2             | Lutra lutra NC011358 9               | 0,18961352 |
| Martes pennanti NC020664 16          | Galidia elegans D146 1               | 0,18961388 |
| Vulpes ferrilata NC027935 1          | Panthera uncia KP202269 1            | 0,18961731 |
| Pardofelis marmorata NLN3 2          | Arctocepalus forsteri KT693377 17    | 0,18961737 |
| Lynx canadensis NC028313 1           | Tapirus terrestris T358              | 0,18961774 |
| Icthyemia albicauda T603 1           | Aonyx cinerea NC035814 2             | 0,18961886 |
| Canis anthus NC027956 2              | Arctotherium sp NC030174 1           | 0,18961915 |
| Ursus cinereoargenteus NC026723 2    | Prionailurus viverrinus NC028305 1   | 0,18962108 |
| Ursus arctos EU497665 29             | Canis latrans NC008093 7             | 0,18962146 |
| Lutrogale perspicillata NC035811 1   | Catopuma temminckii NC027115 41      | 0,18962197 |
| Procyon lotor AB462046 3             | Parahyaena brunnea NC038159 15       | 0,18962233 |
| Panthera tigris amoyensis NC014770 2 | Arctocepalus australis MG023139 1    | 0,18962619 |
| Panthera tigris amoyensis NC014770 2 | Arctocepalus forsteri KT693377 17    | 0,18962635 |
| Panthera leo spelaea KX258452 2      | Meles leucurus NC039173 4            | 0,1896271  |
| Panthera uncia NC010638 1            | Otocyon megalotis SAF1 2             | 0,18962757 |
| Xenogale naso C07XAR110 1            | Galictis vittata T412 1              | 0,18962786 |
| Ursus arctos GU573491 207            | Lynx canadensis NC028313 1           | 0,18962839 |
| Ursus maritimus GU573488 Svalbard    | Felis silvestris lybica KP202275 4   | 0,18962982 |
| Ursus arctos EU497665 29             | Prionailurus planiceps NC028312 6    | 0,18963015 |
| Ursus arctos GU573491 207            | Felis chaus NC028307 1               | 0,18963028 |
| Zalophus wollebaeki SRR4431565 1     | Otocyon megalotis SAF1 2             | 0,18963115 |
| Cynogale bennetti KY117544 1         | Canis lupus familiaris NC002008 1231 | 0,18963206 |
| Ictonyx striatus T299 1              | Icthyemia albicauda T603 1           | 0,18963239 |
| Procyon lotor AB462049 4             | Canis mesomelas KT448280 1           | 0,18963294 |
| Spilogale putorius NC010497 1        | Cuon alpinus NC013445 3              | 0,18963322 |
| Ursus arctos GU573491 207            | Panthera pardus japonensis KJ866876  | 0,1896347  |
| Prionailurus planiceps KY682741 4    | Ailuropoda melanoleuca NC009492 5    | 0,18963628 |
| Otocyon megalotis SAF1 2             | Helarctos malayanus NC009968 2       | 0,1896366  |
| Cynogale bennetti KY117544 1         | Canis aureus KT448274 1              | 0,18963692 |
| Profelis aurata NC028299 1           | Mephitis mephitis NC020648 1         | 0,1896386  |
| Panthera uncia KP202269 1            | Helarctos malayanus NC009968 2       | 0,18964061 |
| Zalophus californianus NC008416 1    | Paradoxurus hermaphroditus NC03959   | 0,18964383 |
| Martes americana NC020642 1          | Cuon alpinus NC013445 3              | 0,18964539 |
| Neofelis nebulosa NC008450 3         | Melogale moschata KP726273 1         | 0,18965162 |
| Potes flavus T414 1                  | Cuon alpinus NC013445 3              | 0,18965413 |
| Panthera leo NERO 19                 | Neophoca cinerea NC008419 1          | 0,18965529 |



|                                       |                                       |            |
|---------------------------------------|---------------------------------------|------------|
| Pusa caspica NC008431 1               | Eupleres goudotii D128 1              | 0,17398354 |
| Mustela altaica NC001751 1            | Bassaricyon neblina SRX1097850 1      | 0,17398973 |
| Poecilogale albinucha T602 1          | Mirounga leonina NC008422 1           | 0,17399423 |
| Genetta genetta T297 1                | Erigonathus barbatus NC008426 1       | 0,17399499 |
| Pusa sibirica NC008432 2              | Felis margarita NC028308 1            | 0,17399667 |
| Procyon lotor AB462049 4              | Ictonyx striatus T299 1               | 0,17399675 |
| Pusa hispida NC 008433 1              | Felis margarita NC028308 1            | 0,17400597 |
| Phoca vitulina NC001325 1             | Felis silvestris lybica KP202275 4    | 0,17400947 |
| Phoca vitulina NC001325 1             | Leopardus guigna NC028321 1           | 0,17401122 |
| Lynx pardinus NC028319 161            | Canis adustus KT448271 1              | 0,17401379 |
| Phoca groenlandica NC008429 54        | Canis adustus KT448271 1              | 0,17402118 |
| Smilodon populator MF871700 1         | Pusa hispida NC 008433 1              | 0,17403981 |
| Lutrogale perspicillata NC035811 1    | Halichoerus grypus NC001602 2         | 0,17404205 |
| Lutra sumatrana NC035810 1            | Ailurus fulgens NCO11124 1            | 0,17404589 |
| Mirounga leonina NC008422 1           | Urva brachyura KY117547 1             | 0,17405063 |
| Pusa sibirica NC008432 2              | Crossarchus platycephalus C7R66 1     | 0,17405063 |
| Mirounga leonina NC008422 1           | Felis nigripes NC028309 1             | 0,17405893 |
| Erigonathus barbatus NC008426 1       | Catopuma temminckii NC027115 41       | 0,17406113 |
| Monachus schauinslandi NC008421 1     | Melogale moschata V0735A 1            | 0,17406133 |
| Pusa caspica NC008431 1               | Lynx canadensis NC028313 1            | 0,17406301 |
| Pusa sibirica NC008432 2              | Prionailurus viverrinus NC028305 1    | 0,17406674 |
| Salanoia concolor D378 1              | Phoca vitulina NC001325 1             | 0,17406772 |
| Proteles cristata T393 6              | Leptonyx chotes weddellii NC008424 1  | 0,17406872 |
| Phoca groenlandica NC008429 54        | Lynx pardinus NC028319 161            | 0,17407008 |
| Mirounga angustirostris SRR10331586 1 | Lynx canadensis NC028313 1            | 0,17407027 |
| Panthera uncia KP202269 1             | Hydrurga leptonyx NC008425 1          | 0,1740725  |
| Phoca fasciata NC008428 1             | Urva javanica/auropunctata NC006835 1 | 0,17409316 |
| Halichoerus grypus NC001602 2         | Genetta abyssinica MG489822 1         | 0,17412646 |
| Ommatophoca rossii AY377287etc 1      | Leopardus wiedii NC028318 1           | 0,17412762 |
| Viverricula indica NC025296 2         | Taxidea taxus NC020646 1              | 0,17412792 |
| Mustela erminea T305 2                | Leopardus pardalis T262 1             | 0,17413032 |
| Mungos mungo MMC7 1                   | Mirounga angustirostris SRR10331586 1 | 0,17413186 |
| Paradoxurus jerdoni MH464793 1        | Lobodon carcinophaga NC008423 1       | 0,17413364 |
| Pusa sibirica NC008432 2              | Leopardus tigrinus NC028317 1         | 0,17413373 |
| Phoca vitulina NC001325 1             | Lutrogale perspicillata NC035811 1    | 0,17413497 |
| Lobodon carcinophaga NC008423 1       | Galidictis civetta DM333 1            | 0,17413525 |
| Lycalopex securus KT448284 1          | Lobodon carcinophaga NC008423 1       | 0,17413639 |
| Profelis aurata NC028299 1            | Phoca fasciata NC008428 1             | 0,17413883 |
| Prionailurus viverrinus NC028305 1    | Phoca groenlandica NC008429 54        | 0,17414002 |
| Monachus monachus NC044972 5          | Martes zibellina NCO11579 39          | 0,17415184 |
| Monachus monachus NC044972 5          | Leopardus tigrinus NC028317 1         | 0,17416123 |
| Monachus monachus NC044972 5          | Martes foina NC020643 1               | 0,17416374 |
| Procyon lotor AB462046 3              | Lontra canadensis SRR10409165 1       | 0,17418011 |
| Ommatophoca rossii AY377287etc 1      | Mustela sibirica AP017394 11          | 0,17418046 |
| Mirounga leonina NC008422 1           | Lontra canadensis SRR10409165 1       | 0,17418116 |
| Leopardus jacobita NC028322 1         | Halichoerus grypus NC001602 2         | 0,17418288 |
| Mustela eversmannii NC028013 1        | Mirounga angustirostris SRR10331586 1 | 0,17419502 |
| Ommatophoca rossii AY377287etc 1      | Hemigalus derbyanus MH464791 1        | 0,17419598 |
| Pusa sibirica NC008432 2              | Prionailurus planiceps NC028312 6     | 0,17419875 |
| Pusa caspica NC008431 1               | Leopardus wiedii NC028318 1           | 0,17420071 |
| Zalophus wolfebaeki SRR4431565 1      | Mustela erminea T305 2                | 0,17420128 |
| Monachus schauinslandi NC008421 1     | Civettictis civetta GLC19 1           | 0,17420642 |
| Phoca largha NC008430 1               | Genetta servalina NC024568 2          | 0,17420708 |
| Pusa caspica NC008431 1               | Genetta abyssinica MG489822 1         | 0,17420777 |
| Phoca vitulina NC001325 1             | Lynx pardinus NC028319 161            | 0,17421141 |
| Prionailurus planiceps KY682741 4     | Phoca largha NC008430 1               | 0,17421199 |
| Prionailurus rubiginosus NC028304 2   | Phoca vitulina NC001325 1             | 0,17421214 |
| Spilogale putorius NC010497 1         | Erigonathus barbatus NC008426 1       | 0,17421294 |
| Ommatophoca rossii AY377287etc 1      | Leptailurus serval NC028316 1         | 0,17422202 |
| Pusa sibirica NC008432 2              | Civettictis civetta NC033378 1        | 0,17423095 |
| Lynx pardinus NC028319 161            | Halichoerus grypus NC001602 2         | 0,17424887 |
| Poecilogale albinucha T602 1          | Halichoerus grypus NC001602 2         | 0,17425032 |
| Martes americana NC020642 1           | Ailurus fulgens NCO11124 1            | 0,17425156 |
| Pusa sibirica NC008432 2              | Ailurus fulgens NCO11124 1            | 0,17425244 |
| Paguma larvata PDD511 2               | Mustela erminea T305 2                | 0,17426471 |
| Viverra zibetha T609 1                | Mustela erminea T305 2                | 0,17426509 |
| Leptonyx chotes weddellii NC008424 1  | Canis mesomelas KT448280 1            | 0,17426725 |
| Pusa sibirica NC008432 2              | Poecilogale albinucha T602 1          | 0,17426863 |
| Erigonathus barbatus NC008426 1       | Ailuropoda melanoleuca NC009492 5     | 0,1742724  |
| Prionailurus rubiginosus NC028304 2   | Ommatophoca rossii AY377287etc 1      | 0,17427242 |
| Leptonyx chotes weddellii NC008424 1  | Crocota crocata NC020670 3            | 0,17427243 |
| Hydrurga leptonyx NC008425 1          | Canis mesomelas KT448280 1            | 0,17427664 |
| Mirounga angustirostris SRR10331586 1 | Leopardus guigna NC028321 1           | 0,17427793 |
| Mirounga angustirostris SRR10331586 1 | Leopardus geoffroyi NC028320 1        | 0,17427805 |
| Poecilogale albinucha T602 1          | Phoca largha NC008430 1               | 0,17428133 |
| Ommatophoca rossii AY377287etc 1      | Leopardus colocolo NC028314 1         | 0,17428671 |
| Phoca largha NC008430 1               | Genetta abyssinica MG489822 1         | 0,17429198 |
| Monachus schauinslandi NC008421 1     | Civettictis civetta NC033378 1        | 0,17431137 |
| Mirounga leonina NC008422 1           | Melogale moschata V0735A 1            | 0,17431587 |
| Leptonyx chotes weddellii NC008424 1  | Canis anthus NC027956 2               | 0,17432098 |
| Galidictis fasciata DM333 1           | Cystophora cristata NC008427 1        | 0,17432357 |
| Lobodon carcinophaga NC008423 1       | Bdeogale nigripes GLC15 1             | 0,17433117 |
| Phoca fasciata NC008428 1             | Paguma larvata PDD511 2               | 0,17433169 |
| Poecilogale albinucha T602 1          | Erigonathus barbatus NC008426 1       | 0,17433546 |
| Leptonyx chotes weddellii NC008424 1  | Chrysoyon brachyurus NC024172 1       | 0,17433828 |
| Phoca vitulina NC001325 1             | Felis nigripes NC028309 1             | 0,17434603 |
| Phoca largha NC008430 1               | Lynx pardinus NC028319 161            | 0,17434625 |
| Prionailurus planiceps NC028312 6     | Phoca largha NC008430 1               | 0,17434667 |
| Spilogale putorius NC010497 1         | Arctonyx collaris NC020645 1          | 0,17436141 |
| Ommatophoca rossii AY377287etc 1      | Mustela itatsi NC034330 19            | 0,17436227 |
| Gulo gulo NC009685 3                  | Bassaricyon neblina SRX1097850 1      | 0,17436332 |
| Viverricula indica KX891745 1         | Halichoerus grypus NC001602 2         | 0,17437643 |
| Leopardus wiedii NC028318 1           | Canis adustus KT448271 1              | 0,17437692 |
| Hemigalus derbyanus MH464791 1        | Ailurus fulgens NCO11124 1            | 0,17437799 |
| Mustela putorius NC020638 4           | Bassaricyon neblina SRX1097850 1      | 0,17438418 |
| Nandinia binotata NC024567 1          | Melogale moschata NC020644 1          | 0,17438872 |
| Leptonyx chotes weddellii NC008424 1  | Galidia elegans D146 1                | 0,17439045 |
| Viverra zibetha T609 1                | Mustela frenata NC020640 1            | 0,17439462 |
| Genetta servalina NC024568 2          | Cystophora cristata NC008427 1        | 0,17439692 |
| Lobodon carcinophaga NC008423 1       | Cynictis penicillata T375 1           | 0,17439798 |
| Panthera uncia KP202269 1             | Cystophora cristata NC008427 1        | 0,17439869 |
| Mustela frenata NC020640 1            | Arctodus simus NCO11116 1             | 0,17440112 |
| Phoca fasciata NC008428 1             | Caracal caracal NC028306 1            | 0,17440826 |

|                                      |                                      |            |
|--------------------------------------|--------------------------------------|------------|
| Vulpes lagopus NC026529 3            | Panthera pardus NCO10641 5           | 0,18965843 |
| Felis chaus NC028307 1               | Arctocepalus forsteri NC004023 28    | 0,18966149 |
| Ursus thibetanus laniger MH281753 2  | Diplogale hosei MH464790 1           | 0,18966173 |
| Ursus arctos EU497665 29             | Panthera leo NERO 19                 | 0,18966334 |
| Panthera uncia KP202269 1            | Martes flavigula NCO12141 3          | 0,18966369 |
| Suricata suricatta SSM10 1           | Martes americana NC020642 1          | 0,18966894 |
| Mephitis mephitis NC020648 1         | Canis lupus familiaris NCO02008 1231 | 0,18966913 |
| Attilax paludinosus T606 1           | Arctocepalus townsendi NC008420 1    | 0,18967062 |
| Vulpes corsac NC023958 1             | Bdeogale nigripes GLC15 1            | 0,1896714  |
| Vulpes corsac NC023958 1             | Attilax paludinosus T606 1           | 0,18967162 |
| Vulpes zerdia KJ603240 1             | Lutra lutra LC050126 1               | 0,18967232 |
| Spilogale putorius NC010497 1        | Melurus ursinus NCO09970 2           | 0,18967293 |
| Vulpes vulpes NC008434 5             | Arctocepalus gazella BK010918 1      | 0,18967342 |
| Neophoca cinerea NC008419 1          | Urva brachyura KY117547 1            | 0,18967398 |
| Panthera leo spelaea KX258452 2      | Gulo gulo NCO09685 3                 | 0,18967421 |
| Ursus maritimus GU573488 Svalbard    | Canis mesomelas KT448280 1           | 0,18967451 |
| Martes pennanti NC020664 16          | Helogale parvula SRR7637809 1        | 0,18967654 |
| Panthera uncia KP202269 1            | Meles leucurus NCO39173 4            | 0,18967853 |
| Otaria byronia OTAB 1                | Nyctereutes procyonoides NCO13700 3  | 0,18968    |
| Panthera pardus japonensis KJ866876  | Lutra lutra NCO11358 9               | 0,18968037 |
| Panthera uncia KP202269 1            | Arctonyx collaris NC020645 1         | 0,18968078 |
| Panthera uncia NCO10638 1            | Mustela sibirica AP017394 11         | 0,18968333 |
| Ursus thibetanus mupinensis NCO0875  | Lutrogale perspicillata NC035811 1   | 0,18968354 |
| Potos flavus T414 1                  | Lyaon pictus NC028427 2              | 0,18968396 |
| Panthera uncia KP202269 1            | Arctocepalus australis MG023139 1    | 0,18968442 |
| Vulpes ferrilata NC027935 1          | Panthera pardus japonensis KJ866876  | 0,1896845  |
| Otocyon megalotis SAF 1 2            | Arctocepalus gazella BK010918 1      | 0,18968499 |
| Speothos venaticus C48 2             | Cynictis penicillata T375 1          | 0,18968518 |
| Speothos venaticus C48 2             | Meles meles T303 3                   | 0,18968584 |
| Paradoxurus jerdoni MH464793 1       | Otocyon megalotis SAF 1 2            | 0,18968621 |
| Ursus maritimus GU573488 Svalbard    | Lontra canadensis SRR10409165 1      | 0,18968737 |
| Potos flavus T414 1                  | Chrysoyon brachyurus NCO24172 1      | 0,18968886 |
| Zalophus wolfebaeki SRR4431565 1     | Vulpes zerdia KJ603240 1             | 0,18968907 |
| Panthera pardus japonensis KJ866876  | Arctocepalus australis NCO08417 1    | 0,18968949 |
| Diplogale hosei MH464790 1           | Arctocepalus australis MG023139 1    | 0,1896895  |
| Poecilogale albinucha T602 1         | Panthera onca KP202264 2             | 0,18969047 |
| Panthera uncia NCO10638 1            | Neovison vison NCO20641 3            | 0,18969084 |
| Panthera tigris amoyensis NCO14770 2 | Mustela putorius NC020638 4          | 0,18969263 |
| Neovison vison NCO20641 3            | Cryptoprocta ferox FC13 1            | 0,18969283 |
| Ursus arctos GU573486 5              | Lontra canadensis SRR10409165 1      | 0,18969309 |
| Mephitis mephitis NC020648 1         | Galierella sanguinea T378 1          | 0,18969315 |
| Ursus thibetanus formosanus NCO093   | Xenogale naso C07XAR110 1            | 0,18969485 |
| Vulpes corsac NC023958 1             | Panthera onca NC022842 1             | 0,189695   |
| Vulpes ferrilata NC027935 1          | Arctictis binturong T605 2           | 0,18969527 |
| Ursus maritimus GU573488 Svalbard    | Prionailurus planiceps NC028312 6    | 0,18969736 |
| Ursus spelaeus EU327344 13           | Canis anthus NC027956 2              | 0,18970257 |
| Lontra canadensis SRR10409165 1      | Acinonyx jubatus NCO05212 3          | 0,18970397 |
| Ursus arctos GU573486 5              | Otocolon manul NC028323 1            | 0,18970487 |
| Galidia elegans D146 1               | Canis lupus familiaris NCO02008 1231 | 0,1897105  |
| Paradoxurus hermaphroditus NLNC 1    | Arctocepalus forsteri NC004023 28    | 0,18971053 |
| Helogale parvula SRR7637809 1        | Gulo gulo NCO09685 3                 | 0,18971112 |
| Canis lupus familiaris NCO02008 1231 | Aonyx cinerea NC035814 2             | 0,18971145 |
| Mephitis mephitis NC020648 1         | Leptailurus serval NC028316 1        | 0,18971185 |
| Ursus arctos AP012576 6              | Felis margarita NC028308 1           | 0,18971319 |
| Canis lupus chanco NCO10340 4        | Aonyx cinerea NC035814 2             | 0,18971536 |
| Panthera leo spelaea KX258452 2      | Lycalopex securus KT448284 1         | 0,18971545 |
| Panthera leo NERO 19                 | Martes americana NC020642 1          | 0,18971665 |
| Vulpes vulpes NC008434 5             | Urva javanica/auropunctata NC006835  | 0,18971665 |
| Panthera leo NERO 19                 | Nyctereutes procyonoides NCO13700 3  | 0,1897186  |
| Panthera pardus NCO10641 5           | Callorhinus ursinus NCO08415 1       | 0,18972063 |
| Neofelis nebulosa NC008450 3         | Mustela itatsi NC034330 19           | 0,18972149 |
| Ursus thibetanus laniger MH281753 2  | Chrysoyon brachyurus NCO24172 1      | 0,18972254 |
| Neofelis nebulosa NC008450 3         | Aonyx cinerea NC035814 2             | 0,18972275 |
| Canis mesomelas KT448280 1           | Arctotherium sp NCO30174 1           | 0,18972647 |
| Panthera pardus NCO10641 5           | Martes melampus NCO09678 1           | 0,18972664 |
| Panthera pardus NCO10641 5           | Nyctereutes procyonoides NCO13700 3  | 0,18972859 |
| Salanoia concolor D378 1             | Lycalopex securus KT448284 1         | 0,18973139 |
| Lutra lutra NCO11358 9               | Canis anthus NC027956 2              | 0,18973354 |
| Helogale parvula SRR7637809 1        | Conepatus chinga NC024596 1          | 0,18973437 |
| Vulpes vulpes NC008434 5             | Lutra lutra NCO11358 9               | 0,18973497 |
| Prionodon linsang ERR2391707 1       | Martes melampus NCO09678 1           | 0,18973555 |
| Panthera pardus NCO10641 5           | Martes martes T302 3                 | 0,18973565 |
| Eumetopias jubatus NCO04030 10       | Chrysoyon brachyurus NCO24172 1      | 0,18973713 |
| Potos flavus T414 1                  | Canis anthus NC027956 2              | 0,18973908 |
| Tremarctos ornatus NCO09969 2        | Suricata suricatta SSM10 1           | 0,18973926 |
| Urocyon cinereoargenteus NC026723 2  | Crossarchus platycephalus C7R66 1    | 0,1897397  |
| Lutra sumatrana NC035810 1           | Canis anthus NC027956 2              | 0,18974055 |
| Cynogale bennetti KY117544 1         | Arctodus simus NCO11116 1            | 0,1897409  |
| Nasua nasua NC020647 1               | Arctocepalus gazella BK010918 1      | 0,18974102 |
| Paradoxurus hermaphroditus NCO3959   | Arctocepalus forsteri KJ69377 17     | 0,18974249 |
| Cuon alpinus NCO13445 3              | Ailuropoda melanoleuca NCO09492 5    | 0,18974252 |
| Vulpes zerdia KJ603240 1             | Mustela itatsi NC034330 19           | 0,18974416 |
| Urocyon cinereoargenteus NCO26723 2  | Mustela putorius NC020638 4          | 0,18974513 |
| Otaria byronia OTAB 1                | Urva brachyura KY117547 1            | 0,18974757 |
| Vulpes lagopus NC026529 3            | Melogale moschata NC020644 1         | 0,18974826 |
| Lyaon pictus NC028427 2              | Arctocepalus forsteri KJ69377 17     | 0,18974982 |
| Ursus maritimus NCO03428 31          | Lutrogale perspicillata NC035811 1   | 0,18975051 |
| Panthera uncia NCO10638 1            | Mustela sibirica NCO20637 6          | 0,1897507  |
| Otocyon megalotis SAF 1 2            | Mustela eversmannii NC028013 1       | 0,18975134 |
| Mellivora capensis T370 1            | Hydrurga leptonyx NC008425 1         | 0,18975145 |
| Panthera uncia NCO10638 1            | Melogale moschata KP726273 1         | 0,18975158 |
| Urocyon cinereoargenteus NCO26723 2  | Felis margarita NC028308 1           | 0,18975489 |
| Proteles cristata T393 6             | Mustela putorius NC020638 4          | 0,18975949 |
| Tremarctos ornatus NCO09969 2        | Chrysoyon brachyurus NCO24172 1      | 0,18975979 |
| Ursus arctos EU497665 29             | Cryptoprocta ferox FC13 1            | 0,18975987 |
| Vulpes corsac NC023958 1             | Ursus thibetanus thibetanus NCO11116 | 0,18976201 |
| Speothos venaticus C48 2             | Genetta genetta T297 1               | 0,18976416 |
| Mephitis mephitis NC020648 1         | Arctocepalus gazella BK010918 1      | 0,18976596 |
| Panthera tigris NCO10642 35          | Aonyx cinerea NC035814 2             | 0,18976659 |
| Panthera onca KP202264 2             | Chrysoyon brachyurus NCO24172 1      | 0,18977021 |
| Ursus arctos GU573486 5              | Felis catus NCO01700 2               | 0,18977036 |
| Canis anthus NC027956 2              | Ailuropoda melanoleuca NCO09492 5    | 0,18977082 |
| Ursus arctos AP012576 6              | Hyena hyena NCO20669 1               | 0,18977311 |

|                                       |                                      |            |
|---------------------------------------|--------------------------------------|------------|
| Panthera pardus japonensis KJ866876 8 | Hydrurga leptonyx NC008425 1         | 0,17440951 |
| Phoca vitulina NC001325 1             | Felis margarita NC028308 1           | 0,17441364 |
| Nandinia binotata NC024567 1          | Martes flavigula NC012141 3          | 0,17442255 |
| Martes martes T302 3                  | Homotherium latidens MF871702 3      | 0,17443363 |
| Smilodon populator MF871700 1         | Phoca vitulina NC001325 1            | 0,17443638 |
| Mustela frenata NC020640 1            | Conepatus chinga NC042596 1          | 0,17443801 |
| Spilogale putorius NC010497 1         | Monachus schauinslandi NC008421 1    | 0,17444122 |
| Lutra lutra NC011358 9                | Bassaricyon neblina SRX1097850 1     | 0,17444962 |
| Pusa caspica NC008431 1               | Lontra canadensis SRR10409165 1      | 0,17445123 |
| Prionailurus viverrinus NC028305 1    | Halichoerus grypus NC001602 2        | 0,17445345 |
| Mustela erminea T305 2                | Crossarchus platycephalus C7R66 1    | 0,17445371 |
| Melogale moschata KP726273 1          | Ailurus fulgens styani NC009691 1    | 0,17445415 |
| Pusa caspica NC008431 1               | Lutrogale perspicillata NC035811 1   | 0,17445806 |
| Phoca fasciata NC008428 1             | Conepatus chinga NC042596 1          | 0,17446268 |
| Pusa hispida NC 008433 1              | Eupleres goudotii D128 1             | 0,17446663 |
| Lobodon carcinophaga NC008423 1       | Xenogale naso C07XAR110 1            | 0,17446636 |
| Mustela erminea T305 2                | Leopardus pardalis NC028315 1        | 0,17446692 |
| Phoca vitulina NC001325 1             | Crossarchus platycephalus C7R66 1    | 0,17446935 |
| Smilodon populator MF871700 1         | Pusa caspica NC008431 1              | 0,17447111 |
| Panthera tigris amoyensis NC014770 2  | Leptonyx chotes weddellii NC008424 1 | 0,17447296 |
| Hydrurga leptonyx NC008425 1          | Hyaena hyaena NC020669 1             | 0,17448264 |
| Panthera pardus NC010641 5            | Leptonyx chotes weddellii NC008424 1 | 0,17449744 |
| Monachus monachus NC044972 5          | Ichthyonyx striatus T299 1           | 0,17450094 |
| Hemigalus derbyanus MH464791 1        | Halichoerus grypus NC001602 2        | 0,17450413 |
| Mirounga angustirostris SRR10331586 1 | Civettictis civetta NC033378 1       | 0,17451723 |
| Pusa sibirica NC008432 2              | Lontra canadensis SRR10409165 1      | 0,17451867 |
| Nandinia binotata NC024567 1          | Martes zibellina NC011579 39         | 0,17451905 |
| Mirounga leonina NC008422 1           | Urva semitorquata MH464789 1         | 0,17452195 |
| Phoca fasciata NC008428 1             | Lontra canadensis SRR10409165 1      | 0,17452648 |
| Taxidea taxus NC020646 1              | Arctocepalus gazella BK010918 1      | 0,17452724 |
| Mustela erminea T305 2                | Lynx pardinus NC028319 161           | 0,17453346 |
| Pusa caspica NC008431 1               | Puma yagouaroundi NC028311 1         | 0,17453627 |
| Prionailurus viverrinus NC028305 1    | Monachus schauinslandi NC008421 1    | 0,17454441 |
| Lobodon carcinophaga NC008423 1       | Cryptoprocta ferox CF13 1            | 0,17454839 |
| Prionailurus planiceps KY682741 4     | Phoca vitulina NC001325 1            | 0,17454858 |
| Monachus monachus NC004972 5          | Crossarchus platycephalus C7R66 1    | 0,17455134 |
| Phoca largha NC008430 1               | Leopardus tigrinus NC028317 1        | 0,17455138 |
| Mustela putorius NC020638 4           | Monachus monachus NC044972 5         | 0,17455292 |
| Felis margarita NC028308 1            | Canis adustus KT448271 1             | 0,17455618 |
| Monachus monachus NC044972 5          | Genetta servalina NC024568 2         | 0,17456399 |
| Halichoerus grypus NC001602 2         | Ailurus fulgens styani NC011124 1    | 0,17456445 |
| Monachus monachus NC044972 5          | Lynx lynx NC027083 4                 | 0,17456958 |
| Lutra lutra NC011358 9                | Ailurus fulgens styani NC009691 1    | 0,17457521 |
| Salanoia concolor D378 1              | Halichoerus grypus NC001602 2        | 0,17457928 |
| Meles meles T303 3                    | Bassaricyon neblina SRX1097850 1     | 0,17458285 |
| Pusa caspica NC008431 1               | Crossarchus platycephalus C7R66 1    | 0,17458928 |
| Neovison vison NC020641 3             | Conepatus chinga NC042596 1          | 0,17458954 |
| Taxidea taxus NC020646 1              | Nasua nasua NC020647 1               | 0,17459631 |
| Pusa hispida NC 008433 1              | Crossarchus platycephalus C7R66 1    | 0,17459764 |
| Paradoxurus jerdoni MH464793 1        | Leptonyx chotes weddellii NC008424 1 | 0,17459825 |
| Procyon lotor AB462046 3              | Ichthyonyx striatus T299 1           | 0,17460252 |
| Mirounga leonina NC008422 1           | Lycan pictus NC028427 2              | 0,17460352 |
| Pusa caspica NC008431 1               | Leopardus geoffroyi NC028320 1       | 0,17460462 |
| Monachus monachus NC044972 5          | Melogale moschata V0735A 1           | 0,17462261 |
| Potos flavus T414 1                   | Conepatus chinga NC042596 1          | 0,17465393 |
| Martes zibellina NC011579 39          | Ailurus fulgens styani NC009691 1    | 0,17465504 |
| Cystophora cristata NC008427 1        | Bdeogale nigripes GLC15 1            | 0,17465661 |
| Erigonathus barbatus NC008426 1       | Atilax paludinosus T606 1            | 0,17465661 |
| Hemigalus derbyanus MH464791 1        | Ailurus fulgens styani NC009691 1    | 0,17466222 |
| Bassaricyon sumichrasti SRX1099089 1  | Arctocepalus pusillus NC008417 1     | 0,17466539 |
| Potos flavus T414 1                   | Arctodus simus NC011116 1            | 0,17466584 |
| Pusa caspica NC008431 1               | Lynx pardinus NC028319 161           | 0,17466937 |
| Pusa caspica NC008431 1               | Prionailurus planiceps KY682741 4    | 0,17467016 |
| Ichthyonyx striatus T299 1            | Ailurus fulgens styani NC009691 1    | 0,17467447 |
| Phoca fasciata NC008428 1             | Catopuma temminckii NC027115 41      | 0,17467649 |
| Phoca groenlandica NC008429 54        | Pardofelis marmorata NLN3 2          | 0,17467664 |
| Prionailurus planiceps NC028312 6     | Phoca vitulina NC001325 1            | 0,17468329 |
| Phoca largha NC008430 1               | Leopardus guigna NC028321 1          | 0,1746856  |
| Monachus schauinslandi NC008421 1     | Mephitis mephitis NC020648 1         | 0,17468816 |
| Monachus monachus NC044972 5          | Genetta genetta T297 1               | 0,17470057 |
| Halichoerus grypus NC001602 2         | Ailuropoda melanoleuca NC009492 5    | 0,17472509 |
| Phoca groenlandica NC008429 54        | Conepatus chinga NC042596 1          | 0,17472512 |
| Nyctereutes procyonoides NC013700 3   | Leptonyx chotes weddellii NC008424 1 | 0,17472619 |
| Melogale moschata NC020644 1          | Bassaricyon neblina SRX1097850 1     | 0,17472871 |
| Phoca largha NC008430 1               | Lontra canadensis SRR10409165 1      | 0,17473336 |
| Genetta servalina NC024568 2          | Arctonox collaris NC020645 1         | 0,17473349 |
| Viverricula indica KX891745 1         | Mustela kathiah NC023210 1           | 0,17473413 |
| Pusa sibirica NC008432 2              | Cryptoprocta ferox CF13 1            | 0,1747351  |
| Pusa caspica NC008431 1               | Felis margarita NC028308 1           | 0,17473736 |
| Phoca groenlandica NC008429 54        | Felis margarita NC028308 1           | 0,1747442  |
| Taxidea taxus NC020646 1              | Homotherium latidens MF871702 3      | 0,17474599 |
| Proteles cristata T393 6              | Hydrurga leptonyx NC008425 1         | 0,17475632 |
| Canis adustus KT448271 1              | Acinonyx jubatus NC005212 3          | 0,17476685 |
| Halichoerus grypus NC001602 2         | Genetta servalina NC024568 2         | 0,17478225 |
| Pusa sibirica NC008432 2              | Cynictis penicillata T375 1          | 0,17479128 |
| Urva semitorquata MH464789 1          | Erigonathus barbatus NC008426 1      | 0,17479128 |
| Mungos mungo MMC7 1                   | Cystophora cristata NC008427 1       | 0,17479293 |
| Pusa sibirica NC008432 2              | Mungotictis decemlineata NC027828 1  | 0,17479384 |
| Melogale moschata NC020644 1          | Ailurus fulgens styani NC011124 1    | 0,17479469 |
| Pusa hispida NC 008433 1              | Urva semitorquata MH464789 1         | 0,17480035 |
| Nasua nasua NC020647 1                | Martes foina NC020643 1              | 0,17480165 |
| Prionailurus rubiginosus NC028304 2   | Canis adustus KT448271 1             | 0,17480174 |
| Panthera onca KP202264 2              | Cystophora cristata NC008427 1       | 0,17480263 |
| Ichneumia albicauda T603 1            | Cystophora cristata NC008427 1       | 0,17480446 |
| Hydrurga leptonyx NC008425 1          | Canis anthus NC027956 2              | 0,17480461 |
| Pusa sibirica NC008432 2              | Felis nigripes NC028309 1            | 0,17480461 |
| Phoca largha NC008430 1               | Crossarchus platycephalus C7R66 1    | 0,17480583 |
| Pusa sibirica NC008432 2              | Leopardus guigna NC028321 1          | 0,17480668 |
| Pusa caspica NC008431 1               | Leopardus jacobita NC028322 1        | 0,17480719 |
| Prionodon pardicolor NC024569 2       | Leptonyx chotes weddellii NC008424 1 | 0,17480832 |
| Viverra zibetha T609 1                | Pusa hispida NC 008433 1             | 0,17480859 |
| Viverra zibetha T609 1                | Monachus schauinslandi NC008421 1    | 0,17481041 |
| Monachus schauinslandi NC008421 1     | Felis margarita NC028308 1           | 0,17481171 |

|                                       |                                    |            |
|---------------------------------------|------------------------------------|------------|
| Otocolobus manul NC028323 1           | Mephitis mephitis NC020648 1       | 0,1897734  |
| Hyaena hyaena NC020669 1              | Canis lupus chanco NC010340 4      | 0,18977779 |
| Ursus arctos AP012576 6               | Lynx canadensis NC028313 1         | 0,18977977 |
| Ursus arctos AP012576 6               | Leopardus wiedii NC028318 1        | 0,18978082 |
| Paguma larvata PDD511 2               | Arctocepalus forsteri NC004023 28  | 0,1897857  |
| Eumetopias jubatus NC004030 10        | Canis latrans NC008093 7           | 0,18978907 |
| Spilogale putorius NC010497 1         | Prionailurus viverrinus NC028305 1 | 0,18979082 |
| Poecilogale albinucha T602 1          | Neofelis nebulosa NC008450 3       | 0,18979502 |
| Ursus americanus JX196366 3           | Leopardus tigrinus NC028317 1      | 0,18979605 |
| Mungos mungo/gambianus SRR77048       | Lycalopex sechurae KT448284 1      | 0,18979643 |
| Poecilogale albinucha T602 1          | Panthera pardus NC010641 5         | 0,18979864 |
| Lycalopex sechurae KT448284 1         | Urva brachyura KY117547 1          | 0,18979882 |
| Mephitis mephitis NC020648 1          | Canis lupus chanco NC010340 4      | 0,18980026 |
| Ursus arctos AP012576 6               | Lycalopex sechurae KT448284 1      | 0,18980514 |
| Panthera pardus NC010641 5            | Lycalopex sechurae KT448284 1      | 0,18980557 |
| Panthera leo NERO 19                  | Canis mesomelas KT448280 1         | 0,18980813 |
| Urocyon cinereoargenteus NC026723 3   | Meles leucurus NC039173 4          | 0,18980868 |
| Mungos mungo MMC7 1                   | Bassaricyon neblina SRX1097850 1   | 0,18980956 |
| Vulpes vulpes NC008434 5              | Arctocepalus pusillus NC008417 1   | 0,18981147 |
| Procyon lotor AB462046 3              | Urva brachyura KY117547 1          | 0,18981168 |
| Urocyon littoralis catalinae KP129018 | Mustela putorius NC020638 4        | 0,1898125  |
| Eumetopias jubatus NC004030 10        | Canis lupus chanco NC010340 4      | 0,18981363 |
| Prionodon linsang ERR2391707 1        | Martes martes T302 3               | 0,18981652 |
| Ursus maritimus GU573488 Svalbard     | Lutrogale perspicillata NC035811 1 | 0,18981779 |
| Leopardus jacobita NC028322 1         | Arctocepalus townsendi NC008420 1  | 0,18982072 |
| Urocyon cinereoargenteus NC026723 3   | Felis catus NC001700 2             | 0,18982169 |
| Ursus arctos isabellinus 1885 2       | Bassaricyon neblina SRX1097850 1   | 0,18982245 |
| Odobenus rosmarus NC004029 29         | Meles leucurus NC039173 4          | 0,18982358 |
| Prionodon pardicolor NC024569 2       | Ailurus fulgens styani NC009691 1  | 0,18982504 |
| Vulpes corsac NC023958 1              | Ailuropoda melanoleuca NC009492 5  | 0,18982548 |
| Panthera uncia KP202269 1             | Otaria byronia OTAB 1              | 0,18982673 |
| Parahyaena brunnea NC038159 15        | Arctotherium sp NC030174 1         | 0,18982875 |
| Nasua nasua NC020647 1                | Hemigalus derbyanus MH464791 1     | 0,18982911 |
| Poecilogale albinucha T602 1          | Ichneumia albicauda T603 1         | 0,18982911 |
| Panthera leo spelaea KX258452 2       | Mustela sibirica AP017394 11       | 0,18982936 |
| Ursus maritimus NC003428 31           | Parahyaena brunnea NC038159 15     | 0,18982963 |
| Panthera leo spelaea KX258452 2       | Mustela sibirica NC020637 6        | 0,18982983 |
| Phocarcos hookeri NC008418 1          | Ailuropoda melanoleuca NC009492 5  | 0,18983136 |
| Panthera tigris amoyensis NC014770 2  | Neophoca cinerea NC008419 1        | 0,1898315  |
| Helarctos malayanus NC009968 2        | Galidia elegans D146 1             | 0,18983163 |
| Ursus arctos GU573491 207             | Leopardus guigna NC028321 1        | 0,18983597 |
| Ursus spelaeus NC011112 8             | Canis anthus NC027956 2            | 0,18983686 |
| Poecilogale albinucha T602 1          | Panthera onca NC022842 1           | 0,18983707 |
| Martes foina NC020643 1               | Crocota crocata NC020670 3         | 0,1898372  |
| Ursus thibetanus formosanus NC0093    | Panthera uncia KP202269 1          | 0,18984108 |
| Panthera leo spelaea KX258452 2       | Lycan pictus NC028427 2            | 0,18984863 |
| Vulpes vulpes NC008434 5              | Ursus americanus JX196366 3        | 0,1898528  |
| Spilogale putorius NC010497 1         | Felis nigripes NC028309 1          | 0,18985841 |
| Odobenus rosmarus NC004029 29         | Helarctos malayanus NC009968 2     | 0,18986268 |
| Neofelis nebulosa NC008450 3          | Martes foina NC020643 1            | 0,18986621 |
| Spilogale putorius NC010497 1         | Leptailurus serval NC028316 1      | 0,18986762 |
| Vulpes corsac NC023958 1              | Lutra lutra NC011358 9             | 0,18986931 |
| Procyon lotor AB462049 4              | Cynogale bennetti KY117544 1       | 0,18987197 |
| Procyon lotor AB462049 4              | Eupleres goudotii D128 1           | 0,18987349 |
| Vulpes lagopus NC026529 3             | Bdeogale nigripes GLC15 1          | 0,18987402 |
| Nasua nasua NC020647 1                | Arctocepalus australis MG023139 1  | 0,18987413 |
| Mustela sibirica AP017394 11          | Galidia elegans D146 1             | 0,18987705 |
| Ursus maritimus NC003428 31           | Canis mesomelas KT448280 1         | 0,18987705 |
| Vulpes vulpes NC008434 5              | Procyon lotor AB462046 3           | 0,1898789  |
| Suricata suricatta SSM10 1            | Otaria byronia OTAB 1              | 0,18987931 |
| Otaria byronia OTAB 1                 | Xenogale naso C07XAR110 1          | 0,18987973 |
| Canis latrans NC008093 7              | Arctocepalus pusillus NC008417 1   | 0,18988068 |
| Lycalopex sechurae KT448284 1         | Galerella sanguinea T378 1         | 0,18988076 |
| Meles meles T303 3                    | Cryptoprocta ferox CF13 1          | 0,18988134 |
| Otocyon megalotis SAF1 2              | Mungos mungo MMC7 1                | 0,18988222 |
| Urocyon cinereoargenteus NC026723 3   | Taxidea taxus NC020646 1           | 0,1898835  |
| Otocyon megalotis SAF1 2              | Atilax paludinosus T606 1          | 0,18988352 |
| Ursus arctos isabellinus 1885 2       | Helogale parvula SRR7637809 1      | 0,18988559 |
| Panthera onca KP202264 2              | Arctocepalus australis MG023139 1  | 0,18988657 |
| Galerella sanguinea T378 1            | Ailurus fulgens styani NC011124 1  | 0,18988693 |
| Panthera leo spelaea KX258452 2       | Lutra lutra NC011358 9             | 0,18988903 |
| Hyaena hyaena NC020669 1              | Arctocepalus australis MG023139 1  | 0,18988918 |
| Ursus maritimus NC003428 31           | Bassaricyon neblina SRX1097850 1   | 0,18988973 |
| Ursus maritimus GU573488 Svalbard     | Bassaricyon neblina SRX1097850 1   | 0,18988983 |
| Urocyon littoralis catalinae KP129018 | Puma yagouaroundi NC028311 1       | 0,1898901  |
| Parahyaena brunnea NC038159 15        | Neophoca cinerea NC008419 1        | 0,1898912  |
| Paradoxurus hermaphroditus NC03959    | Arctocepalus pusillus NC008417 1   | 0,18989253 |
| Lycalopex sechurae KT448284 1         | Cynogale bennetti KY117544 1       | 0,18989293 |
| Procyon lotor AB462046 3              | Lycan pictus NC028427 2            | 0,18989505 |
| Ursus arctos GU573486 5               | Bassaricyon neblina SRX1097850 1   | 0,18989588 |
| Ursus maritimus NC003428 31           | Panthera uncia KP202269 1          | 0,18989794 |
| Ursus thibetanus thibetanus NC011112  | Atilax paludinosus T606 1          | 0,1898988  |
| Ursus spelaeus NC011112 8             | Cynictis penicillata T375 1        | 0,1898991  |
| Ursus maritimus GU573488 Svalbard     | Felis nigripes NC028309 1          | 0,18989912 |
| Ursus maritimus NC003428 31           | Felis silvestris Lybica KP202275 4 | 0,18989916 |
| Eupleres goudotii D128 1              | Canis lupus chanco NC010340 4      | 0,18989936 |
| Odobenus rosmarus NC004029 29         | Melogale moschata KP726273 1       | 0,18989968 |
| Mungotictis decemlineata NC027828     | Melurus ursinus NC009970 2         | 0,18989991 |
| Ursus arctos prinosus MG066703 3      | Felis chaus NC028307 1             | 0,18989995 |
| Ursus arctos prinosus MG066703 3      | Ichneumia albicauda T603 1         | 0,18990336 |
| Canis lupus chanco NC010340 4         | Arctocepalus pusillus NC008417 1   | 0,18990451 |
| Prionailurus planiceps NC028312 6     | Mephitis mephitis NC020648 1       | 0,18990532 |
| Proteles cristata T393 6              | Neovison vison NC020641 3          | 0,18990628 |
| Otaria byronia OTAB 1                 | Diplogale hoesi MH464790 1         | 0,18990876 |
| Otaria byronia OTAB 1                 | Ailuropoda melanoleuca NC009492 5  | 0,18991078 |
| Urva javanica/auripunctata NC006835   | Aonyx cinerea NC035814 2           | 0,1899126  |
| Eumetopias jubatus NC004030 10        | Tapirus terrestris T358            | 0,18991493 |
| Martes zibellina NC011579 39          | Cuon alpinus NC013445 3            | 0,18991704 |
| Ursus americanus JX196366 3           | Paradoxurus hermaphroditus NC03959 | 0,18992878 |
| Ursus americanus JX196366 3           | Prionodon pardicolor NC024569 2    | 0,18993071 |
| Ursus maritimus NC003428 31           | Panthera leo NERO 19               | 0,18993282 |
| Suricata suricatta SSM10 1            | Tapirus terrestris T358            | 0,18993285 |
| Panthera pardus NC010641 5            | Mustela altaica NC021751 1         | 0,18993513 |

|                                        |                                       |            |
|----------------------------------------|---------------------------------------|------------|
| Phoca largha NC008430 1                | Pardofelis marmorata NLN3 2           | 0,17481743 |
| Phoca largha NC008430 1                | Felis silvestris lybica KP202275 4    | 0,17481771 |
| Procyon lotor AB462049 4               | Lontra canadensis SRR10409165 1       | 0,17485325 |
| Puma yagouaroundi NC028311 1           | Halichoerus grypus NC001602 2         | 0,17485468 |
| Salanoia concolor D378 1               | Erigonathus barbatus NC008426 1       | 0,17486183 |
| Mustela nivalis T306 5                 | Bassaricyon neblina SRX1097850 1      | 0,1748648  |
| Ommatophoca rossii AY377287etc 1       | Leopardus pardalis NC028315 1         | 0,1748658  |
| Mustela frenata NC020640 1             | Hemigalus derbyanus MH464791 1        | 0,17486712 |
| Pusa caspica NC008431 1                | Prionailurus viverrinus NC028305 1    | 0,1748748  |
| Bassariscus sumichrasti SRX1099089 1   | Ailurus fulgens styani NC009691 1     | 0,174877   |
| Monachus schauinslandi NC008421 1      | Genetta servalina NC024568 2          | 0,17487833 |
| Phoca groenlandica NC008429 54         | Felis silvestris lybica KP202275 4    | 0,17487864 |
| Mirounga angustirostris SRR10331586 1  | Lynx rufus NC014456 3                 | 0,1748789  |
| Panthera onca NC022842 1               | Cystophora cristata NC008427 1        | 0,17488112 |
| Mirounga angustirostris SRR10331586 1  | Ictonyx striatus T299 1               | 0,17488234 |
| Mirounga leonina NC008422 1            | Diplogale hosei MH464790 1            | 0,17488317 |
| Paguma larvata PDD511 2                | Mirounga angustirostris SRR10331586 1 | 0,17488447 |
| Felis catus NC001700 2                 | Canis adustus KT448271 1              | 0,17488487 |
| Otocolobus manul NC028323 1            | Canis adustus KT448271 1              | 0,17488956 |
| Mustela erminea T305 2                 | Leopardus colocolo NC028314 1         | 0,17488982 |
| Meles meles T303 3                     | Hemigalus derbyanus MH464791 1        | 0,17490201 |
| Phoca vitulina NC001325 1              | Genetta abyssinica MG489822 1         | 0,17490733 |
| Taxidea taxus NC020646 1               | Civettictis civetta NC033378 1        | 0,17490771 |
| Civettictis civetta NC033378 1         | Canis adustus KT448271 1              | 0,17491935 |
| Eumetopias jubatus NC004030 10         | Arctodus simus NC011116 1             | 0,17492032 |
| Mustela eversmanni NC028013 1          | Bassaricyon neblina SRX1097850 1      | 0,1749226  |
| Cystophora cristata NC008427 1         | Bassaricyon neblina SRX1097850 1      | 0,17492504 |
| Pusa caspica NC008431 1                | Mungotictis decemlineata NC027828 1   | 0,17492852 |
| Paradoxurus hermaphroditus NC039591 1  | Canis adustus KT448271 1              | 0,17493472 |
| Viverra zibetha T609 1                 | Phoca fasciata NC008428 1             | 0,17493771 |
| Pusa caspica NC008431 1                | Prionailurus planiceps NC028312 6     | 0,17493948 |
| Mustela erminea T305 2                 | Leopardus geoffroyi NC028320 1        | 0,17494093 |
| Phoca fasciata NC008428 1              | Pardofelis marmorata NLN3 2           | 0,17494538 |
| Phoca fasciata NC008428 1              | Felis silvestris lybica KP202275 4    | 0,17494559 |
| Prionailurus planiceps KY682741 4      | Monachus schauinslandi NC008421 1     | 0,17494616 |
| Mirounga leonina NC008422 1            | Galictis vittata T412 1               | 0,17494631 |
| Phoca fasciata NC008428 1              | Otocolobus manul NC028323 1           | 0,17494719 |
| Ursus thibetanus thibetanus NC011118 4 | Meles meles T303 3                    | 0,17495245 |
| Prionailurus rubiginosus NC028304 2    | Phoca largha NC008430 1               | 0,17495306 |
| Phoca vitulina NC001325 1              | Leopardus tigrinus NC028317 1         | 0,17495525 |
| Martes zibellina NC011579 39           | Homotherium latidens MF871702 3       | 0,17495552 |
| Urva javanica/auropunctata NC006835 1  | Erigonathus barbatus NC008426 1       | 0,17495769 |
| Monachus monachus NC044972 5           | Urva javanica T413 1                  | 0,17496111 |
| Halichoerus grypus NC001602 2          | Bassaricyon neblina SRX1097850 1      | 0,17497623 |
| Mustela kathiah NC023210 1             | Conepatus chinga NC042596 1           | 0,17499005 |
| Potos flavus T414 1                    | Callorhinus ursinus NC008415 1        | 0,17499104 |
| Leopardus geoffroyi NC028320 1         | Halichoerus grypus NC001602 2         | 0,17499134 |
| Mustela erminea T305 2                 | Lynx lynx NC027083 4                  | 0,17500414 |
| Panthera pardus japonensis KJ866876 8  | Cystophora cristata NC008427 1        | 0,1750046  |
| Pusa sibirica NC008432 2               | Catopuma temminckii NC027115 41       | 0,17500536 |
| Pusa sibirica NC008432 2               | Otocolobus manul NC028323 1           | 0,17500778 |
| Pusa hispida NC 008433 1               | Felis catus NC001700 2                | 0,17501627 |
| Mustela kathiah NC023210 1             | Mephitis mephitis NC020648 1          | 0,17501712 |
| Canis adustus KT448271 1               | Arctictis binturong T605 2            | 0,17501736 |
| Phoca vitulina NC001325 1              | Pardofelis marmorata NLN3 2           | 0,17501928 |
| Panthera leo spelaea KX258452 2        | Hydrurga leptonyx NC008425 1          | 0,17502421 |
| Panthera tigris NC010642 35            | Hydrurga leptonyx NC008425 1          | 0,17502561 |
| Zalophus californianus NC008416 1      | Arctodus simus NC011116 1             | 0,17502823 |
| Felis chaus NC028307 1                 | Canis adustus KT448271 1              | 0,17503096 |
| Martes melampus NC009678 1             | Homotherium latidens MF871702 3       | 0,17505503 |
| Mustela frenata NC020640 1             | Bassaricyon neblina SRX1097850 1      | 0,17505752 |
| Pusa hispida NC 008433 1               | Chrotogale owstoni T607 1             | 0,17506127 |
| Monachus monachus NC044972 5           | Urva javanica/auropunctata NC006835 1 | 0,17506193 |
| Phoca groenlandica NC008429 54         | Chrotogale owstoni T607 1             | 0,17506411 |
| Taxidea taxus NC020646 1               | Arctocepalus forsteri KT693377 17     | 0,17506477 |
| Nandinia binotata NC024567 1           | Arctocepalus sp NC030174 1            | 0,17506702 |
| Phoca fasciata NC008428 1              | Urva brachyura KY117547 1             | 0,17507049 |
| Prionodon linsang ERR2391707 1         | Canis adustus KT448271 1              | 0,17507307 |
| Pusa sibirica NC008432 2               | Felis catus NC001700 2                | 0,17507361 |
| Pusa caspica NC008431 1                | Prionailurus rubiginosus NC028304 2   | 0,17507453 |
| Nyctereutes procyonoides NC013700 3    | Hydrurga leptonyx NC008425 1          | 0,17507499 |
| Pusa hispida NC 008433 1               | Galerella sanguinea T378 1            | 0,17508075 |
| Monachus schauinslandi NC008421 1      | Felis silvestris lybica KP202275 4    | 0,17508119 |
| Mirounga angustirostris SRR10331586 1  | Felis nigripes NC028309 1             | 0,17508222 |
| Pusa hispida NC 008433 1               | Catopuma temminckii NC027115 41       | 0,1750825  |
| Pusa hispida NC 008433 1               | Felis chaus NC028307 1                | 0,17508352 |
| Galictis vittata T412 1                | Bassariscus sumichrasti SRX1099089 1  | 0,17508624 |
| Monachus schauinslandi NC008421 1      | Diplogale hosei MH464790 1            | 0,17508677 |
| Parahyaena brunnea NC038159 15         | Lobodon carinophaga NC008423 1        | 0,17509069 |
| Poecilogale albinocha T602 1           | Monachus monachus NC044972 5          | 0,17510459 |
| Prionailurus bengalensis CKM45 20      | Ommatophoca rossii AY377287etc 1      | 0,17510492 |
| Ommatophoca rossii AY377287etc 1       | Mustela putorius NC020638 4           | 0,17510594 |
| Viverricula indica KX891745 1          | Canis lupus chanco NC010340 4         | 0,17511004 |
| Halichoerus grypus NC001602 2          | Eupleres goudotii D128 1              | 0,17511053 |
| Mustela erminea T305 2                 | Homotherium latidens MF871702 3       | 0,17511128 |
| Ommatophoca rossii AY377287etc 1       | Fossa fossana D350 1                  | 0,17511196 |
| Taxidea taxus NC020646 1               | Conepatus chinga NC042596 1           | 0,17511211 |
| Halichoerus grypus NC001602 2          | Felis silvestris lybica KP202275 4    | 0,17512333 |
| Urva brachyura KY117547 1              | Erigonathus barbatus NC008426 1       | 0,17512792 |
| Martes martes T302 3                   | Ailurus fulgens styani NC009691 1     | 0,17512833 |
| Taxidea taxus NC020646 1               | Arctocepalus australis MG023139 1     | 0,17513139 |
| Ommatophoca rossii AY377287etc 1       | Mustela sibirica NC020637 6           | 0,17513496 |
| Viverra tangalunga MH464792 1          | Hemigalus derbyanus MH464791 1        | 0,17513682 |
| Pusa hispida NC 008433 1               | Lontra canadensis SRR10409165 1       | 0,17513932 |
| Phoca vitulina NC001325 1              | Bassaricyon neblina SRX1097850 1      | 0,17513947 |
| Galictis vittata T412 1                | Erigonathus barbatus NC008426 1       | 0,17514664 |
| Monachus schauinslandi NC008421 1      | Felis nigripes NC028309 1             | 0,17514856 |
| Genetta servalina NC024568 2           | Canis adustus KT448271 1              | 0,1751496  |
| Mirounga angustirostris SRR10331586 1  | Felis chaus NC028307 1                | 0,17515044 |
| Phoca largha NC008430 1                | Catopuma temminckii NC027115 41       | 0,17515288 |
| Monachus schauinslandi NC008421 1      | Arctictis binturong T605 2            | 0,17516017 |
| Phoca vitulina NC001325 1              | Hemigalus derbyanus MH464791 1        | 0,17516154 |
| Smilodon populator MF871700 1          | Halichoerus grypus NC001602 2         | 0,17516546 |

|                                        |                                        |            |
|----------------------------------------|----------------------------------------|------------|
| Lycalopex sechurae KT448284 1          | Atilax paludinosus T606 1              | 0,18993719 |
| Melogale moschata KP726273 1           | Urva brachyura KY117547 1              | 0,18993834 |
| Taxidea taxus NC020646 1               | Tapirus terrestris T358                | 0,18993838 |
| Suricata suricatta SSM10 1             | Mustela putorius NC020638 4            | 0,18993931 |
| Ursus arctos EU497665 29               | Canis mesomelas KT448280 1             | 0,18994164 |
| Urocyon littoralis catalinae KP129018  | Crossarchus platycephalus C7R66 1      | 0,18994166 |
| Vulpes lagopus NC026529 3              | Suricata suricatta SSM10 1             | 0,18994172 |
| Cynictis penicillata T375 1            | Ailurus fulgens NC011124 1             | 0,18994235 |
| Vulpes lagopus NC026529 3              | Lutra sumatrana NC035810 1             | 0,1899426  |
| Proteles cristata T393 6               | Eumetopias jubatus NC004030 10         | 0,18994336 |
| Vulpes vulpes NC008434 5               | Galidia elegans D146 1                 | 0,18994412 |
| Paguma larvata PDD511 2                | Arctocepalus townsendi NC008420 1      | 0,18994519 |
| Potos flavus T414 1                    | Canis mesomelas KT448280 1             | 0,18994747 |
| Procyon lotor AB462046 3               | Canis anthus NC027956 2                | 0,18994942 |
| Lontra canadensis SRR10409165 1        | Genetta servalina NC024568 2           | 0,18994944 |
| Lycyon pictus NC028427 2               | Callorhinus ursinus NC008415 1         | 0,18994993 |
| Vulpes ferrillata NC027935 1           | Paguma larvata PDD511 2                | 0,18995045 |
| Ursus arctos GU573486 5                | Conepatus chinga NC042596 1            | 0,18995067 |
| Melogale moschata KP726273 1           | Ichnemia albicauda T603 1              | 0,18995158 |
| Ursus arctos isabellinus 1885 2        | Prionodon linsang ERR2391707 1         | 0,18995211 |
| Urva javanica/auropunctata NC006835    | Cuon alpinus NC013445 3                | 0,18995585 |
| Lontra canadensis SRR10409165 1        | Caracal caracal NC028306 1             | 0,1899559  |
| Ursus arctos isabellinus 1885 2        | Canis anthus NC027956 2                | 0,18995862 |
| Procyon lotor AB462049 4               | Panthera uncia KP202269 1              | 0,18995976 |
| Ursus thibetanus laniger MH281753 2    | Urva semitorquata MH464789 1           | 0,18996134 |
| Ursus arctos GU573491 207              | Paradoxurus hermaphroditus NLNC 1      | 0,18996233 |
| Panthera tigris NC010642 35            | Mustela nigripes NC024942 1            | 0,18996254 |
| Ursus maritimus GU573488 Svalbard      | Panthera uncia KP202269 1              | 0,18996531 |
| Panthera onca NC022842 1               | Arctocepalus forsteri KT693377 17      | 0,18996546 |
| Prionodon pardicolor NC024569 2        | Otocyon megalotis SAF1 2               | 0,18996669 |
| Ursus arctos pruinus MG066703 3        | Leopardus tigrinus NC028317 1          | 0,18996672 |
| Urva brachyura KY117547 1              | Helarctos malayanus NC009968 2         | 0,18996678 |
| Proteles cristata T393 6               | Mustela nivalis T306 5                 | 0,18997045 |
| Mephitis mephitis NC020648 1           | Leopardus tigrinus NC028317 1          | 0,18997142 |
| Galictis fasciata DM333 1              | Chrysoyon brachyurus NC024172 1        | 0,18997276 |
| Panthera tigris NC010642 35            | Neovison vison NC020641 3              | 0,18997313 |
| Panthera onca NC022842 1               | Otaria byronia OTAB 1                  | 0,18997319 |
| Taxidea taxus NC020646 1               | Crocuta crocuta NC020670 3             | 0,18997322 |
| Aonyx cinerea NC035814 2               | Ailuropoda melanoleuca NC009492 5      | 0,18997353 |
| Melurus ursinus NC009970 2             | Ichnemia albicauda T603 1              | 0,18997584 |
| Procyon lotor AB462049 4               | Canis aureus KT448274 1                | 0,18997768 |
| Ursus spelaeus NC011112 8              | Panthera uncia KP202269 1              | 0,18997811 |
| Speothos venaticus C48 2               | Arctictis binturong T605 2             | 0,18998012 |
| Ursus arctos AP012576 6                | Prionailurus planiceps KY682741 4      | 0,18998295 |
| Zalophus californianus NC008416 1      | Panthera uncia NC010638 1              | 0,18998404 |
| Ursus arctos GU573486 5                | Mephitis mephitis NC020648 1           | 0,1899848  |
| Ursus spelaeus NC011112 8              | Proteles cristata T393 6               | 0,18998528 |
| Ursus americanus JX196366 3            | Lutrogale perspicillata NC035811 1     | 0,18998586 |
| Ursus thibetanus thibetanus NC011118 4 | Panthera onca NC022842 1               | 0,18998875 |
| Meles anakuma NC009677 1               | Cuon alpinus NC013445 3                | 0,18999034 |
| Panthera pardus NC010641 5             | Meles anakuma NC009677 1               | 0,18999121 |
| Vulpes ferrillata NC027935 1           | Martes flavigula NC012141 3            | 0,18999363 |
| Cuon alpinus NC013445 3                | Chrotogale owstoni T607 1              | 0,18999502 |
| Leopardus jacobita NC028322 1          | Cuon alpinus NC013445 3                | 0,18999639 |
| Felis nigripes NC028309 1              | Arctocepalus forsteri NC004023 28      | 0,19000125 |
| Proteles cristata T393 6               | Canis adustus KT448271 1               | 0,19000132 |
| Ursus maritimus NC003428 31            | Panthera pardus NC010641 5             | 0,19000401 |
| Nyctereutes procyonoides NC013700 3    | Lutra lutra NC011358 9                 | 0,19000469 |
| Suricata suricatta SSM10 1             | Mustela eversmanni NC028013 1          | 0,19000646 |
| Urva javanica T413 1                   | Arctocepalus australis MG023139 1      | 0,19000721 |
| Urva semitorquata MH464789 1           | Bassaricyon neblina SRX1097850 1       | 0,19000846 |
| Vulpes vulpes NC008434 5               | Aonyx cinerea NC035814 2               | 0,19001098 |
| Paradoxurus jerdoni MH464793 1         | Arctocepalus townsendi NC008420 1      | 0,19001111 |
| Salanoia concolor D378 1               | Arctocepalus townsendi NC008420 1      | 0,19001201 |
| Galictis fasciata DM333 1              | Arctocepalus townsendi NC008420 1      | 0,19001277 |
| Procyon lotor AB462049 4               | Cynictis penicillata T375 1            | 0,19001313 |
| Helogale parvula SRR7637809 1          | Canis mesomelas KT448280 1             | 0,19001544 |
| Panthera uncia NC010638 1              | Arctonyx collaris NC020645 1           | 0,19001742 |
| Panthera uncia NC010638 1              | Callorhinus ursinus NC008415 1         | 0,19001816 |
| Hyaena hyaena NC020669 1               | Canis anthus NC027956 2                | 0,19001916 |
| Ursus arctos GU573486 5                | Canis mesomelas KT448280 1             | 0,19001926 |
| Nyctereutes procyonoides NC013700 3    | Hyaena hyaena NC020669 1               | 0,19002046 |
| Phocarcus hookeri NC008418 1           | Paguma larvata PDD511 2                | 0,19002028 |
| Vulpes zerda KJ603240 1                | Mustela altaica NC021751 1             | 0,19002165 |
| Vulpes nigripes NC028309 1             | Arctocepalus gazella BK010918 1        | 0,19002225 |
| Spilogale putorius NC010497 1          | Urva javanica/auropunctata NC006835    | 0,19002283 |
| Urocyon cinereoargenteus NC026723 2    | Puma concolor NC016470 22              | 0,19002414 |
| Urocyon littoralis catalinae KP129018  | Prionailurus planiceps KY682741 4      | 0,19002422 |
| Ursus thibetanus thibetanus NC011118 4 | Cynogale bennetti KY117544 1           | 0,19002433 |
| Urocyon littoralis catalinae KP129018  | Prionailurus viverrinus NC028305 1     | 0,19002521 |
| Ursus arctos isabellinus 1885 2        | Hyaena hyaena NC020669 1               | 0,19002552 |
| Diplogale hosei MH464790 1             | Arctocepalus forsteri KT693377 17      | 0,19002584 |
| Proteles cristata T393 6               | Callorhinus ursinus NC008415 1         | 0,19002679 |
| Panthera pardus japonensis KJ866876    | Mustela altaica NC021751 1             | 0,19002843 |
| Felis margarita NC028308 1             | Bassaricyon neblina SRX1097850 1       | 0,190029   |
| Viverra tangalunga MH464792 1          | Odobenus rosmarus NC004029 29          | 0,19002904 |
| Odobenus rosmarus NC004029 29          | Mustela nigripes NC024942 1            | 0,19003014 |
| Diplogale hosei MH464790 1             | Cuon alpinus NC013445 3                | 0,19003026 |
| Vulpes vulpes NC008434 5               | Ursus thibetanus thibetanus NC011118 4 | 0,19003141 |
| Ursus arctos EU497665 29               | Ichnemia albicauda T603 1              | 0,19003163 |
| Panthera pardus japonensis KJ866876    | Lycalopex sechurae KT448284 1          | 0,19003183 |
| Ursus arctos pruinus MG066703 3        | Panthera onca KP202264 2               | 0,19003263 |
| Ursus arctos isabellinus 1885 2        | Felis nigripes NC028309 1              | 0,19003335 |
| Ursus maritimus NC003428 31            | Felis nigripes NC028309 1              | 0,19003379 |
| Helogale parvula SRR7637809 1          | Chrysoyon brachyurus NC024172 1        | 0,19003387 |
| Suricata suricatta SSM10 1             | Helarctos malayanus NC009968 2         | 0,19003394 |
| Vulpes vulpes NC008434 5               | Prionailurus viverrinus NC028305 1     | 0,19003427 |
| Ursus arctos GU573491 207              | Puma concolor NC016470 22              | 0,1900344  |
| Odobenus rosmarus NC004029 29          | Melogale moschata V0735A 1             | 0,19003469 |
| Ursus thibetanus thibetanus NC011118 4 | Galidia elegans D146 1                 | 0,19003636 |
| Mephitis mephitis NC020648 1           | Leopardus jacobita NC028322 1          | 0,19003877 |
| Zalophus californianus NC008416 1      | Nasua nasua NC020647 1                 | 0,19003962 |
| Zalophus californianus NC008416 1      | Urva javanica T413 1                   | 0,19004023 |

|                                        |                                      |            |
|----------------------------------------|--------------------------------------|------------|
| Ommatophoca rossii AY377287etc 1       | Martes foina NC020643 1              | 0,17517203 |
| Taxidea taxus NC020646 1               | Genetta abyssinica MG489822 1        | 0,17518157 |
| Phoca largha NC008430 1                | Civettictis civetta NC033378 1       | 0,17518829 |
| Halichoerus grypus NC001602 2          | Felis margarita NC028308 1           | 0,17519036 |
| Viverra tangalunga MH464792 1          | Nandinia binotata NC024567 1         | 0,17519261 |
| Mirounga leonina NC008422 1            | Eupleres goudotii D128 1             | 0,17519465 |
| Eupleres goudotii D128 1               | Erignathus barbatus NC008426 1       | 0,17519529 |
| Vulpes vulpes NC008434 5               | Leptonyx chotes weddellii NC008424 1 | 0,17519666 |
| Mungotictis decemlineata NC027828 1    | Cystophora cristata NC008427 1       | 0,17519821 |
| Pusa sibirica NC008432 2               | Civettictis civetta GLC19 1          | 0,17520489 |
| Taxidea taxus NC020646 1               | Civettictis civetta GLC19 1          | 0,17520609 |
| Phoca groenlandica NC008429 54         | Lutrogale perspicillata NC035811 1   | 0,17520717 |
| Phoca fasciata NC008428 1              | Felis margarita NC028308 1           | 0,17521511 |
| Viverricula indica XK891745 1          | Ommatophoca rossii AY377287etc 1     | 0,17522003 |
| Phoca vitulina NC001325 1              | Ailuropus melanoleuca NC009492 5     | 0,17522496 |
| Ommatophoca rossii AY377287etc 1       | Leopardus guigna NC028321 1          | 0,17523755 |
| Lynx canadensis NC028313 1             | Canis adustus KT448271 1             | 0,17523862 |
| Panthera pardus NC010641 5             | Cystophora cristata NC008427 1       | 0,17524402 |
| Pusa hispida NC 008433 1               | Conepatus chinga NC042596 1          | 0,17525814 |
| Ommatophoca rossii AY377287etc 1       | Homotherium latidens MF871702 3      | 0,17526047 |
| Mustela erminea T305 2                 | Arctocepalus gazella BK010918 1      | 0,17526226 |
| Lutrogale perspicillata NC035811 1     | Erignathus barbatus NC008426 1       | 0,17526676 |
| Viverricula indica XK891751 1          | Taxidea taxus NC020646 1             | 0,17526692 |
| Viverricula indica XK891745 1          | Taxidea taxus NC020646 1             | 0,17526811 |
| Viverra zibetha T609 1                 | Taxidea taxus NC020646 1             | 0,17526902 |
| Viverricula indica NC025926 2          | Ommatophoca rossii AY377287etc 1     | 0,17527072 |
| Phoca fasciata NC008428 1              | Ura semitorquata MH464789 1          | 0,17527251 |
| Viverra zibetha T609 1                 | Phoca groenlandica NC008429 54       | 0,17527439 |
| Phoca vitulina NC001325 1              | Catopuma temminckii NC027115 41      | 0,17528756 |
| Phoca largha NC008430 1                | Felis margarita NC028308 1           | 0,17528921 |
| Neovison vison NC020641 3              | Arctodus simus NC011116 1            | 0,17529169 |
| Mustela eversmannii NC028013 1         | Monachus monachus NC044972 5         | 0,17529371 |
| Mirounga leonina NC008422 1            | Ura javanica/auropunctata NC006835 1 | 0,17529652 |
| Ommatophoca rossii AY377287etc 1       | Mustela nigripes NC024942 1          | 0,17531148 |
| Mustela erminea T305 2                 | Fossa fossana D350 1                 | 0,17532948 |
| Panthera uncia KP202269 1              | Erignathus barbatus NC008426 1       | 0,17534019 |
| Ommatophoca rossii AY377287etc 1       | Leopardus jacobita NC028322 1        | 0,17534027 |
| Pusa sibirica NC008432 2               | Pardofelis marmorata NLN3 2          | 0,17534304 |
| Pusa sibirica NC008432 2               | Caracal caracal NC028306 1           | 0,17534435 |
| Mirounga angustirostris SRR10331586 1  | Felis silvestris lybica KP202275 4   | 0,17535146 |
| Pusa hispida NC 008433 1               | Panthera onca NC022624 2             | 0,17535388 |
| Paradoxurus jerdoni MH464793 1         | Neovison vison NC020641 3            | 0,17535785 |
| Smilodon populator MF871700 1          | Phoca largha NC008430 1              | 0,17536321 |
| Ommatophoca rossii AY377287etc 1       | Meles anakuma NC009677 1             | 0,17536376 |
| Mungos mungo/gambianus SRR7704821 1    | Monachus monachus NC044972 5         | 0,17536519 |
| Pusa hispida NC 008433 1               | Panthera leo NERO 19                 | 0,17538564 |
| Melogale moschata V0735A 1             | Ailuropus fulgens styani NC009691 1  | 0,17539664 |
| Martes pennanti NC020664 16            | Ailuropus fulgens styani NC009691 1  | 0,17540246 |
| Nandinia binotata NC024567 1           | Mustela nivalis T306 5               | 0,1754037  |
| Mustela erminea T305 2                 | Lynx canadensis NC028313 1           | 0,17540483 |
| Pusa caspica NC008431 1                | Felis catus NC001700 2               | 0,17541032 |
| Mirounga angustirostris SRR10331586 1  | Ura brachyura KY117547 1             | 0,17541036 |
| Prionailurus planiceps NC028312 6      | Monachus schauinslandi NC008421 1    | 0,17541739 |
| Monachus schauinslandi NC008421 1      | Lynx rufus NC014456 3                | 0,17541757 |
| Mirounga leonina NC008422 1            | Mephitis mephitis NC020648 1         | 0,17542033 |
| Pusa hispida NC 008433 1               | Pardofelis marmorata NLN3 2          | 0,17542073 |
| Pusa hispida NC 008433 1               | Mephitis mephitis NC020648 1         | 0,17542448 |
| Ursus thibetanus thibetanus NC011118 4 | Mustela erminea T305 2               | 0,17542896 |
| Pusa hispida NC 008433 1               | Panthera onca NC022842 1             | 0,17543212 |
| Prionailurus planiceps KY682741 4      | Halichoerus grypus NC001602 2        | 0,17546012 |
| Halichoerus grypus NC001602 2          | Cryptoprocta ferox FC13 1            | 0,17546551 |
| Taxidea taxus NC020646 1               | Arctodus simus NC011116 1            | 0,17546895 |
| Lynx lynx NC027083 4                   | Enhydra lutris NC009692 1            | 0,17547236 |
| Mirounga leonina NC008422 1            | Felis silvestris lybica KP202275 4   | 0,1754728  |
| Phoca groenlandica NC008429 54         | Paguma larvata PDD511 2              | 0,1754764  |
| Parahyaena brunnea NC038159 15         | Cystophora cristata NC008427 1       | 0,17548054 |
| Taxidea taxus NC020646 1               | Lynx lynx NC027083 4                 | 0,17548105 |
| Monachus schauinslandi NC008421 1      | Felis catus NC001700 2               | 0,17548555 |
| Panthera uncia KP202269 1              | Lobodon carcinophaga NC008423 1      | 0,17548665 |
| Phoca largha NC008430 1                | Genetta genetta T297 1               | 0,17548849 |
| Eumetopias jubatus NC004030 10         | Bassariscus sumichrasti SRX1099089 1 | 0,17551111 |
| Neovison vison NC020641 3              | Genetta abyssinica MG489822 1        | 0,17552611 |
| Viverra tangalunga MH464792 1          | Bassariscus neblina SRX1097850 1     | 0,17552833 |
| Melogale moschata KP26273 1            | Bassariscus neblina SRX1097850 1     | 0,17552845 |
| Ommatophoca rossii AY377287etc 1       | Lynx lynx NC027083 4                 | 0,17552884 |
| Phoca vitulina NC001325 1              | Conepatus chinga NC042596 1          | 0,17553155 |
| Pusa caspica NC008431 1                | Ura semitorquata MH464789 1          | 0,17553191 |
| Civettictis civetta GLC19 1            | Canis adustus KT448271 1             | 0,17553493 |
| Neophoca cinerea NC008419 1            | Bassariscus sumichrasti SRX1099089 1 | 0,17553555 |
| Pusa hispida NC 008433 1               | Mungos mungo/gambianus SRR7704821 1  | 0,17554137 |
| Pusa sibirica NC008432 2               | Genetta servalina NC024568 2         | 0,17554137 |
| Phoca fasciata NC008428 1              | Attilax paludinosus T606 1           | 0,1755417  |
| Phoca fasciata NC008428 1              | Crossarchus platycephalus C7R66 1    | 0,17554197 |
| Proteles cristata T393 6               | Cynogale bennetti KY117544 1         | 0,17554246 |
| Meles leucurus NC039173 4              | Hemigalus derbyanus MH464791 1       | 0,17554373 |
| Mirounga angustirostris SRR10331586 1  | Ura semitorquata MH464789 1          | 0,17554377 |
| Mustela erminea T305 2                 | Leopardus guigna NC028321 1          | 0,17554682 |
| Taxidea taxus NC020646 1               | Lynx rufus NC014456 3                | 0,17554717 |
| Phoca largha NC008430 1                | Mungotictis decemlineata NC027828 1  | 0,17554884 |
| Phoca vitulina NC001325 1              | Felis chaus NC028307 1               | 0,17555811 |
| Viverricula indica XK891751 1          | Neovison vison NC020641 3            | 0,17555837 |
| Ursus thibetanus formosanus NC009331 1 | Mustela erminea T305 2               | 0,17556128 |
| Mustela erminea T305 2                 | Genetta abyssinica MG489822 1        | 0,17558423 |
| Ursus thibetanus laniger MH281753 2    | Ommatophoca rossii AY377287etc 1     | 0,17558548 |
| Tremarctos ornatus NC009969 2          | Ommatophoca rossii AY377287etc 1     | 0,17558762 |
| Mirounga leonina NC008422 1            | Canis aureus KT448274 1              | 0,17558847 |
| Nasua nasua NC020647 1                 | Mustela erminea T305 2               | 0,17559583 |
| Pusa sibirica NC008432 2               | Mungos mungo MMC7 1                  | 0,17560118 |
| Potos flavus T414 1                    | Arctotherium sp NC030174 1           | 0,17560457 |
| Pusa hispida NC 008433 1               | Mungos mungo MMC7 1                  | 0,17560892 |
| Pusa sibirica NC008432 2               | Galerella sanguinea T378 1           | 0,17560904 |
| Nandinia binotata NC024567 1           | Ictonyx striatus T299 1              | 0,17561045 |
| Phoca vitulina NC001325 1              | Mungos mungo/gambianus SRR7704821 1  | 0,17561305 |

|                                        |                                      |             |
|----------------------------------------|--------------------------------------|-------------|
| Panthera leo spelaea KX258452 2        | Mustela nivalis T306 5               | 0,19004124  |
| Ursus thibetanus laniger MH281753 2    | Panthera uncia NC010638 1            | 0,19004484  |
| Ura javanica/auropunctata NC006835 1   | Arctocepalus townsendi NC008420 1    | 0,19004558  |
| Ursus spelaeus NC011112 8              | Prionodon pardicolor NC024569 2      | 0,19004583  |
| Ursus thibetanus laniger MH281753 2    | Proteles cristata T393 6             | 0,19005005  |
| Ursus spelaeus NC011112 8              | Panthera onca NC0022842 1            | 0,19005598  |
| Neofelis nebulosa NC008450 3           | Mustela putorius NC020638 4          | 0,19005578  |
| Spilogale putorius NC010497 1          | Leopardus pardalis T262 1            | 0,19006081  |
| Ursus arctos GU573491 207              | Lycalopex sechurae KT448284 1        | 0,19006117  |
| Ursus arctos EU497665 29               | Lycalopex sechurae KT448284 1        | 0,19006199  |
| Ursus arctos isabellinus 1885 2        | Panthera leo NERO 19                 | 0,19006751  |
| Ursus thibetanus mupinensis NC00879 2  | Panthera leo NERO 19                 | 0,19006883  |
| Spilogale putorius NC010497 1          | Catopuma badia NC028300 1            | 0,19006947  |
| Eupleres goudotii D128 1               | Ailuropus fulgens styani NC009691 1  | 0,19007167  |
| Ura brachyura KY117547 1               | Conepatus chinga NC042596 1          | 0,19007316  |
| Cuon alpinus NC013445 3                | Bassariscus sumichrasti SRX1099089 1 | 0,1900733   |
| Cynogale bennetti KY117544 1           | Canis latrans NC008093 7             | 0,19007391  |
| Ura javanica T413 1                    | Arctocepalus gazella BK010918 1      | 0,19007576  |
| Eumetopias jubatus NC004030 10         | Crocota crocata NC020670 3           | 0,19007611  |
| Ursus thibetanus thibetanus NC011118 4 | Panthera leo NERO 19                 | 0,19007799  |
| Bdeogale nigripes GLC15 1              | Aonyx cinerea NC035814 2             | 0,19007896  |
| Ura brachyura KY117547 1               | Aonyx cinerea NC035814 2             | 0,19007936  |
| Galidia elegans D146 1                 | Arctocepalus forsteri KT693377 17    | 0,19008045  |
| Viverricula indica XK891751 1          | Arctocepalus townsendi NC008420 1    | 0,19008055  |
| Paguma larvata PDD511 2                | Arctocepalus forsteri KT693377 17    | 0,19008099  |
| Vulpes ferrilata NC027935 1            | Chrotogale owstoni T607 1            | 0,19008107  |
| Otocyon megalotis SAF1 2               | Bassariscus sumichrasti SRX1099089 1 | 0,19008559  |
| Viverra tangalunga MH464792 1          | Cryptoprocta ferox FC13 1            | 0,19008723  |
| Vulpes corsac NC023958 1               | Genetta genetta T297 1               | 0,19008723  |
| Prionodon pardicolor NC024569 2        | Callorhinus ursinus NC008415 1       | 0,19008756  |
| Vulpes corsac NC023958 1               | Panthera pardus japonensis KJ866876  | 0,19008823  |
| Vulpes zerdia KJ603240 1               | Panthera pardus japonensis KJ866876  | 0,19008909  |
| Ursus arctos isabellinus 1885 2        | Lontra canadensis SRR10409165 1      | 0,1900914   |
| Zalophus californianus NC008416 1      | Panthera pardus japonensis KJ866876  | 0,19009189  |
| Meles anakuma NC009677 1               | Lycyon pictus NC028427 2             | 0,19009218  |
| Parahyaena brunnea NC038159 15         | Arctocepalus forsteri KT693377 17    | 0,19009301  |
| Parahyaena brunnea NC038159 15         | Arctocepalus australis MG023139 1    | 0,1900932   |
| Ursus thibetanus laniger MH281753 2    | Cynogale bennetti KY117544 1         | 0,19009364  |
| Panthera onca NC022842 1               | Ailuropus fulgens styani NC009691 1  | 0,19009417  |
| Poecilogale albinucha T602 1           | Panthera pardus japonensis KJ866876  | 0,19009446  |
| Parahyaena brunnea NC038159 15         | Arctocepalus gazella BK010918 1      | 0,19009474  |
| Proteles cristata T393 6               | Bassariscus sumichrasti SRX1099089 1 | 0,19009505  |
| Ursus arctos GU573491 207              | Cryptoprocta ferox FC13 1            | 0,19009648  |
| Panthera tigris NC010642 35            | Mustela putorius NC020638 4          | 0,19009669  |
| Proteles cristata T393 6               | Otaria byronia OTAB 1                | 0,19009766  |
| Otocyon megalotis SAF1 2               | Mustela nivalis T306 5               | 0,19009784  |
| Panthera leo spelaea KX258452 2        | Mustela eversmannii NC028013 1       | 0,19009833  |
| Vulpes vulpes NC008434 5               | Panthera leo spelaea KX258452 2      | 0,1901011   |
| Melursus ursinus NC009970 2            | Bassariscus neblina SRX1097850 1     | 0,19010136  |
| Ursus arctos pruinusosus MG066703 3    | Prionailurus planiceps NC028312 6    | 0,19010164  |
| Ursus maritimus NC003428 31            | Otocolobus manul NC028323 1          | 0,19010253  |
| Panthera tigris NC010642 35            | Bassariscus sumichrasti SRX1099089 1 | 0,19010387  |
| Paradoxurus hermaphroditus NC03959 5   | Martes flavigula NC012141 3          | 0,19010727  |
| Odobenus rosmarus NC004029 29          | Melogale moschata NC020644 1         | 0,19010891  |
| Arctocepalus pusillus NC008417 1       | Arctictis binturong T605 2           | 0,19011058  |
| Canis aureus KT448274 1                | Arctocepalus forsteri KT693377 17    | 0,19011247  |
| Ura javanica/auropunctata NC006835 1   | Ailuropus fulgens styani NC009691 1  | 0,19011328  |
| Speothos venaticus C48 2               | Ailuropus melanoleuca NC009492 5     | 0,19011371  |
| Ursus arctos AP012576 6                | Puma concolor NC016470 22            | 0,19011785  |
| Ursus spelaeus NC011112 8              | Lycyon pictus NC028427 2             | 0,19011842  |
| Vulpes corsac NC023958 3               | Gulo gulo NC009658 3                 | 0,19012205  |
| Panthera leo NERO 19                   | Arctotherium sp NC030174 1           | 0,19013116  |
| Viverricula indica XK891751 1          | Arctocepalus forsteri NC004023 28    | 0,19013396  |
| Ursus maritimus GU573488 Svalbard      | Panthera leo NERO 19                 | 0,19013484  |
| Ura javanica/auropunctata NC006835 1   | Galictis vittata T412 1              | 0,19013599  |
| Ursus arctos GU573486 5                | Diplogale hosei MH464790 1           | 0,19013685  |
| Suricata suricatta SSM10 1             | Mustela sibirica AP017394 11         | 0,19014101  |
| Bassariscus neblina SRX1097850 1       | Attilax paludinosus T606 1           | 0,19014309  |
| Vulpes vulpes NC008434 5               | Ura semitorquata MH464789 1          | 0,19014317  |
| Urocyon littoralis catalinae KP129018  | Fossa fossana D350 1                 | 0,19014348  |
| Phocarcos hookeri NC008418 1           | Galidia elegans D146 1               | 0,19014685  |
| Urocyon cinereoargenteus NC026723 2    | Mustela sibirica AP017394 11         | 0,19014896  |
| Viverricula indica XK891751 1          | Arctocepalus gazella BK010918 1      | 0,19014983  |
| Tremarctos ornatus NC009969 2          | Bassariscus neblina SRX1097850 1     | 0,19014993  |
| Prionodon linsang ERR2391707 1         | Martes pennanti NC020664 16          | 0,19015065  |
| Ursus thibetanus mupinensis NC00879 2  | Cynogale bennetti KY117544 1         | 0,19015121  |
| Speothos venaticus C48 2               | Attilax paludinosus T606 1           | 0,190151525 |
| Urocyon littoralis catalinae KP129018  | Leopardus pardalis T262 1            | 0,19015808  |
| Urocyon cinereoargenteus NC026723 2    | Felis nigripes NC028309 1            | 0,19015822  |
| Ursus arctos GU573491 207              | Lontra canadensis SRR10409165 1      | 0,19015859  |
| Urocyon cinereoargenteus NC026723 2    | Prionailurus planiceps KY682741 4    | 0,19015875  |
| Ursus arctos GU573486 5                | Lutrogale perspicillata NC035811 1   | 0,19016069  |
| Panthera pardus japonensis KJ866876    | Martes martes T302 3                 | 0,19016434  |
| Ursus maritimus GU573488 Svalbard      | Otocyon megalotis SAF1 2             | 0,19016503  |
| Vulpes vulpes NC008434 5               | Ursus spelaeus EU327344 13           | 0,19016589  |
| Vulpes corsac NC023958 1               | Ursus spelaeus EU327344 13           | 0,19016603  |
| Phocarcos hookeri NC008418 1           | Panthera tigris amoyensis NC014770 2 | 0,19016764  |
| Ursus arctos GU573491 207              | Felis silvestris lybica KP202275 4   | 0,19016829  |
| Ursus maritimus GU573488 Svalbard      | Felis catus NC001700 2               | 0,19016831  |
| Ursus arctos GU573491 207              | Prionailurus planiceps NC028312 6    | 0,19016859  |
| Panthera onca NC022842 1               | Arctocepalus gazella BK010918 1      | 0,19016927  |
| Ursus maritimus GU573488 Svalbard      | Otocolobus manul NC028323 1          | 0,19016989  |
| Procyon lotor AB462046 3               | Panthera tigris NC010642 35          | 0,19017033  |
| Procyon lotor AB462046 3               | Panthera tigris amoyensis NC014770 2 | 0,19017035  |
| Ursus spelaeus EU327344 13             | Mungotictis decemlineata NC027828 1  | 0,19017164  |
| Melursus ursinus NC009970 2            | Canis latrans NC008093 7             | 0,19017285  |
| Mungotictis decemlineata NC027828 1    | Chrysoyon brachyurus NC004217 2      | 0,19017348  |
| Ursus arctos pruinusosus MG066703 3    | Cryptoprocta ferox FC13 1            | 0,19017372  |
| Canis aureus KT448274 1                | Arctocepalus gazella BK010918 1      | 0,19017552  |
| Ursus thibetanus laniger MH281753 2    | Parahyaena brunnea NC038159 15       | 0,19017734  |
| Zalophus californianus NC008416 1      | Lycalopex sechurae KT448284 1        | 0,19018075  |
| Ursus arctos AP012576 6                | Cryptoprocta ferox FC13 1            | 0,19018161  |
| Ursus arctos AP012576 6                | Prionailurus viverrinus NC028305 1   | 0,19018173  |

|                                        |                                       |            |
|----------------------------------------|---------------------------------------|------------|
| Pusa caspica NC008431 1                | Leopardus guigna NC028321 1           | 0,17561474 |
| Mustela nigripes NC024942 1            | Arctodus simus NC011116 1             | 0,17561497 |
| Panthera leo spelaea KX258452 2        | Leptonychia weddellii NC008424 1      | 0,17561693 |
| Ursus thibetanus mupinensis NC008753 2 | Mustela erminea T305 2                | 0,17561901 |
| Panthera tigris NC010642 35            | Cystophora cristata NC008427 1        | 0,17561939 |
| Viverra zibetha T609 1                 | Phoca largha NC008430 1               | 0,17562072 |
| Phoca fasciata NC008428 1              | Ichneumia albicauda T603 1            | 0,17562209 |
| Viverra zibetha T609 1                 | Neovison vison NC020641 3             | 0,17562562 |
| Lycalopex secureus KT448284 1          | Hydrurga leptonyx NC008425 1          | 0,17562576 |
| Mirounga angustirostris SRR10331586 1  | Genetta genetta T297 1                | 0,17562582 |
| Pusa hispida NC 008433 1               | Hyaena hyaena NC020669 1              | 0,1756261  |
| Phoca largha NC008430 1                | Otocolobus manul NC028323 1           | 0,17562678 |
| Phoca largha NC008430 1                | Ailuropoda melanoleuca NC009492 5     | 0,17562866 |
| Mirounga leonina NC008422 1            | Canis lupus familiaris NC002008 1231  | 0,17563151 |
| Neofelis nebulosa NC008450 3           | Leptonychia weddellii NC008424 1      | 0,17564295 |
| Neovison vison NC020641 3              | Eumetopias jubatus NC004030 10        | 0,17564628 |
| Helogale parvula SRR7637809 1          | Cystophora cristata NC008427 1        | 0,17566657 |
| Procyon lotor AB462046 3               | Nandinia binotata NC024567 1          | 0,17566961 |
| Pusa sibirica NC008432 2               | Galidictis fasciata DM333 1           | 0,17566988 |
| Mirounga angustirostris SRR10331586 1  | Conepatus chinga NC042596 1           | 0,17567086 |
| Nandinia binotata NC024567 1           | Mustela altaica NC021751 1            | 0,17567381 |
| Phoca groenlandica NC008429 54         | Eupleres goudotii D128 1              | 0,17567487 |
| Mustela frenata NC020640 1             | Leopardus pardalis NC028315 1         | 0,17567594 |
| Martes melampus NC009678 1             | Lynx pardinus NC028319 161            | 0,17567609 |
| Prionodon linsang ERR2391707 1         | Hydrurga leptonyx NC008425 1          | 0,17567678 |
| Genetta genetta T297 1                 | Cystophora cristata NC008427 1        | 0,17567779 |
| Salanoia concolor D378 1               | Phoca groenlandica NC008429 54        | 0,17567925 |
| Mirounga angustirostris SRR10331586 1  | Urva javanica T413 1                  | 0,1756795  |
| Pusa hispida NC 008433 1               | Mungotictis decemlineata NC027828 1   | 0,17568144 |
| Taxidea taxus NC020646 1               | Lynx pardinus NC028319 161            | 0,17568204 |
| Bassariscus sumichrasti SRX1099089 1   | Ailuurus fulgens NC011124 1           | 0,17568456 |
| Paguma larvata PDD511 2                | Neovison vison NC020641 3             | 0,17569353 |
| Hydrurga leptonyx NC008425 1           | Chrysocyon brachyurus NC024172 1      | 0,17569548 |
| Puma yagouaroundi NC028311 1           | Canis adustus KT448271 1              | 0,17569605 |
| Ommatophoca rossii AY377287etc 1       | Leopardus geoffroyi NC028320 1        | 0,17569624 |
| Viverra tangalunga MH464792 1          | Ommatophoca rossii AY377287etc 1      | 0,17572056 |
| Prionailurus rubiginosus NC028304 2    | Halichoerus grypus NC001602 2         | 0,17572904 |
| Hydrurga leptonyx NC008425 1           | Cynogale bennetti KY117544 1          | 0,17573087 |
| Viverra zibetha T609 1                 | Mustela kathiah NC023210 1            | 0,1757452  |
| Ommatophoca rossii AY377287etc 1       | Helarctos malayanus NC009968 2        | 0,17574562 |
| Prionailurus viverrinus NC028305 1     | Mustela erminea T305 2                | 0,17574799 |
| Ursus thibetanus mupinensis NC008753 2 | Meles meles T303 3                    | 0,17574924 |
| Procyon lotor AB462046 3               | Monachus schauinslandi NC008421 1     | 0,17574973 |
| Pusa sibirica NC008432 2               | Ailuropoda melanoleuca NC009492 5     | 0,17575261 |
| Mephitis mephitis NC020648 1           | Cystophora cristata NC008427 1        | 0,17575318 |
| Mephitis mephitis NC020648 1           | Erigonathus barbatus NC008426 1       | 0,17575464 |
| Galictis vittata T412 1                | Cystophora cristata NC008427 1        | 0,17575563 |
| Phoca largha NC008430 1                | Civettictis civetta GLC19 1           | 0,17575623 |
| Taxidea taxus NC020646 1               | Arctocepalus forsteri NC004023 28     | 0,1757572  |
| Phoca vitulina NC001325 1              | Felis catus NC001700 2                | 0,17576008 |
| Ursus spelaeus NC011112 8              | Mustela erminea T305 2                | 0,17576547 |
| Lutra lutra NC011358 9                 | Ailuurus fulgens NC011124 1           | 0,17578734 |
| Felis nigripes NC028309 1              | Canis adustus KT448271 1              | 0,1757988  |
| Martes zibellina NC011579 39           | Ailuurus fulgens NC011124 1           | 0,17579977 |
| Ursus spelaeus EU327344 13             | Ommatophoca rossii AY377287etc 1      | 0,17580108 |
| Pusa sibirica NC008432 2               | Urva semitorquata MH464789 1          | 0,17580123 |
| Vulpes lagopus NC026529 3              | Leptonychia weddellii NC008424 1      | 0,17580265 |
| Mustela erminea T305 2                 | Arctocepalus pusillus NC008417 1      | 0,17580515 |
| Neovison vison NC020641 3              | Bassariscyon neblina SRX1097850 1     | 0,17580566 |
| Martes pennanti NC020664 16            | Ailuurus fulgens NC011124 1           | 0,17580667 |
| Mirounga leonina NC008422 1            | Felis margarita NC028308 1            | 0,17580982 |
| Panthera uncia NC010638 1              | Leptonychia weddellii NC008424 1      | 0,17581032 |
| Paradoxurus hermaphroditus NLNC 1      | Lobodon carcinophaga NC008423 1       | 0,17581173 |
| Zalophus wolfebaekii SRR4431565 1      | Arctodus simus NC011116 1             | 0,17582181 |
| Pusa hispida NC 008433 1               | Genetta genetta T297 1                | 0,17582195 |
| Phoca largha NC008430 1                | Felis nigripes NC028309 1             | 0,17582774 |
| Ommatophoca rossii AY377287etc 1       | Aonyx cinerea NC035814 2              | 0,17584077 |
| Mustela erminea T305 2                 | Callorhinus ursinus NC008415 1        | 0,17586435 |
| Erigonathus barbatus NC008426 1        | Bdeogale nigripes GLC15 1             | 0,17586857 |
| Conepatus chinga NC042596 1            | Bassariscus sumichrasti SRX1099089 1  | 0,17586978 |
| Nandinia binotata NC024567 1           | Martes pennanti NC020664 16           | 0,17587031 |
| Salanoia concolor D378 1               | Mirounga leonina NC008422 1           | 0,17587297 |
| Taxidea taxus NC020646 1               | Neophoca cinerea NC008419 1           | 0,17587428 |
| Paradoxurus hermaphroditus NLNC 1      | Mirounga leonina NC008422 1           | 0,17587788 |
| Phoca fasciata NC008428 1              | Genetta genetta T297 1                | 0,17588165 |
| Paradoxurus jerdoni MH464793 1         | Hydrurga leptonyx NC008425 1          | 0,17588435 |
| Pusa hispida NC 008433 1               | Ichneumia albicauda T603 1            | 0,17589158 |
| Fossa fossana D350 1                   | Canis adustus KT448271 1              | 0,17589942 |
| Martes melampus NC009678 1             | Eumetopias jubatus NC004030 10        | 0,17590685 |
| Viverricula indica KX891745 1          | Canis lupus familiaris NC002008 1231  | 0,17590888 |
| Pusa hispida NC 008433 1               | Urva javanica/auropunctata NC006835 1 | 0,17590915 |
| Panthera leo NERO 19                   | Erigonathus barbatus NC008426 1       | 0,17591085 |
| Monachus monachus NC0044972 5          | Aonyx cinerea NC035814 2              | 0,17591122 |
| Mirounga angustirostris SRR10331586 1  | Urva javanica/auropunctata NC006835 1 | 0,17591585 |
| Monachus monachus NC0044972 5          | Lynx rufus NC014456 3                 | 0,17591593 |
| Monachus monachus NC0044972 5          | Arctictis binturong T605 2            | 0,17592925 |
| Mustela erminea T305 2                 | Hemigalus derbyanus MH464791 1        | 0,17592457 |
| Lontra canadensis SRR10409165 1        | Bassariscyon neblina SRX1097850 1     | 0,17592924 |
| Hemigalus derbyanus MH464791 1         | Canis adustus KT448271 1              | 0,1759315  |
| Mustela frenata NC020640 1             | Canis adustus KT448271 1              | 0,17593516 |
| Melogale moschata KP726273 1           | Ailuurus fulgens NC011124 1           | 0,17593545 |
| Procyon lotor AB462049 4               | Lutrogale perspicillata NC035811 1    | 0,17593654 |
| Prionailurus bengalensis NC028301 12   | Meles meles T303 3                    | 0,17594    |
| Mirounga angustirostris SRR10331586 1  | Melogale moschata V0735A 1            | 0,17594433 |
| Mustela frenata NC020640 1             | Leopardus pardalis T262 1             | 0,17594524 |
| Phoca vitulina NC001325 1              | Lontra canadensis SRR10409165 1       | 0,17594543 |
| Mirounga leonina NC008422 1            | Catopuma temminckii NC027115 41       | 0,17594576 |
| Martes flavigula NC012141 3            | Eumetopias jubatus NC004030 10        | 0,17594938 |
| Pusa sibirica NC008432 2               | Felis chaus NC028307 1                | 0,1759496  |
| Vulpes vulpes NC008434 5               | Hydrurga leptonyx NC008425 1          | 0,17595045 |
| Mirounga angustirostris SRR10331586 1  | Lutrogale perspicillata NC035811 1    | 0,17595178 |
| Mustela frenata NC020640 1             | Mephitis mephitis NC020648 1          | 0,175954   |
| Ictonyx striatus T299 1                | Ailuurus fulgens NC011124 1           | 0,17595413 |

|                                       |                                      |            |
|---------------------------------------|--------------------------------------|------------|
| Zalophus californianus NC008416 1     | Panthera pardus japonensis KJ866876  | 0,1901869  |
| Enhydra lutris NC009692 1             | Diplogale hoesi MH464790 1           | 0,19019035 |
| Panthera onca NC022842 1              | Galictis vittata T412 1              | 0,19019184 |
| Helogale parvula SRR7637809 1         | Cuon alpinus NC013445 3              | 0,19019587 |
| Ursus thibetanus formosanus NC0093    | Odobenus rosmarus NC004029 29        | 0,1901973  |
| Panthera pardus NC010641 5            | Neophoca cinerea NC008419 1          | 0,19019857 |
| Ursus arctos GU573491 207             | Diplogale hoesi MH464790 1           | 0,19019872 |
| Spilogale putorius NC010497 1         | Lynx lynx NC027083 4                 | 0,19020222 |
| Ursus maritimus GU573488 Svalbard     | Panthera pardus NC010641 5           | 0,19020602 |
| Vulpes zerdia KJ603240 1              | Lutra lutra NC011358 9               | 0,19021021 |
| Prionodon linsang ERR2391707 1        | Melogale moschata V0735A 1           | 0,19021036 |
| Vulpes corsac NC023958 1              | Mungos mungo MMC7 1                  | 0,19021046 |
| Urocyon cinereoargenteus NC026723     | Fossa fossana D350 1                 | 0,19021086 |
| Phocarcos hookeri NC008418 1          | Urva brachyura KY117547 1            | 0,19021124 |
| Vulpes zerdia KJ603240 1              | Galerella sanguinea T378 1           | 0,19021174 |
| Phocarcos hookeri NC008418 1          | Nasua nasua NC020647 1               | 0,19021185 |
| Otaria byronia OTAB 1                 | Eupleres goudotii D128 1             | 0,1902121  |
| Urocyon cinereoargenteus NC026723     | Salanoia concolor D378 1             | 0,19021389 |
| Vulpes zerdia KJ603240 1              | Lutra sumatrana NC035810 1           | 0,19021392 |
| Mustela nigripes NC024942 1           | Galidia elegans D146 1               | 0,19021423 |
| Galidia elegans D146 1                | Arctocepalus townsendi NC008420 1    | 0,19021444 |
| Neophoca cinerea NC008419 1           | Galidia elegans D146 1               | 0,19021459 |
| Vulpes lagopus NC026529 3             | Arctocepalus pusillus NC008417 1     | 0,19021575 |
| Urocyon littoralis catalinae KP129018 | Mustela sibirica AP017394 11         | 0,19021638 |
| Salanoia concolor D378 1              | Procyon lotor AB462049 4             | 0,19021699 |
| Panthera uncia NC010638 1             | Meles leucurus NC039173 4            | 0,19021741 |
| Viverricula indica KX891745 1         | Lontra canadensis SRR10409165 1      | 0,19021778 |
| Vulpes vulpes NC008434 5              | Arctotherium sp NC030174 1           | 0,19021839 |
| Meles anakuma NC009677 1              | Canis mesomelas KT448280 1           | 0,19022021 |
| Vulpes vulpes NC008434 5              | Ursus thibetanus mupinensis NC008753 | 0,19022158 |
| Lycan pictus NC028427 2               | Arctocepalus gazella BK010918 1      | 0,19022188 |
| Ursus maritimus NC003428 31           | Helogale parvula SRR7637809 1        | 0,19022244 |
| Panthera onca KP202264 2              | Arctocepalus gazella BK010918 1      | 0,19022512 |
| Urocyon littoralis catalinae KP129018 | Felis nigripes NC028309 1            | 0,19022562 |
| Nyctereutes procyonoides NC013700 3   | Genetta genetta T297 1               | 0,19022565 |
| Urocyon littoralis catalinae KP129018 | Prionailurus beninensis NC028312 6   | 0,19022639 |
| Panthera pardus japonensis KJ866876   | Neophoca cinerea NC008419 1          | 0,19022661 |
| Mephitis mephitis NC020648 1          | Arctocepalus forsteri KT693377 17    | 0,19022755 |
| Otocyon megalotis SAF1 2              | Arctotherium sp NC030174 1           | 0,19023007 |
| Proteles cristata T393 6              | Mustela kathiah NC023210 1           | 0,19023131 |
| Otocolobus manul NC028323 1           | Lutrogale perspicillata NC035811 1   | 0,19023134 |
| Vulpes corsac NC023958 1              | Panthera tigris amoyensis NC014770 2 | 0,19023152 |
| Panthera tigris NC010642 35           | Arctocepalus australis MG023139 1    | 0,19023237 |
| Vulpes zerdia KJ603240 1              | Panthera onca NC022842 1             | 0,19023426 |
| Phocarcos hookeri NC008418 1          | Panthera tigris NC010642 35          | 0,19023491 |
| Ursus spelaeus NC011112 8             | Attilax paludinosus T606 1           | 0,19023544 |
| Panthera tigris NC010642 35           | Neophoca cinerea NC008419 1          | 0,19023545 |
| Ursus arctos GU573491 207             | Leopardus tigrinus NC028317 1        | 0,19023596 |
| Ursus arctos pruinosus MG066703 3     | Puma concolor NC016470 22            | 0,19023672 |
| Procyon lotor AB462046 3              | Chrysocyon brachyurus NC024172 1     | 0,1902374  |
| Ursus spelaeus NC011112 8             | Urva javanica T413 1                 | 0,19023937 |
| Neophoca cinerea NC008419 1           | Arctictis binturong T605 2           | 0,19024026 |
| Ursus arctos AP012576 6               | Canis latrans NC008093 7             | 0,19024122 |
| Ursus arctos GU573486 5               | Felis nigripes NC028309 1            | 0,19024198 |
| Canis aureus KT448274 1               | Aonyx cinerea NC035814 2             | 0,19024576 |
| Panthera leo NERO 19                  | Conepatus chinga NC042596 1          | 0,19024585 |
| Ursus thibetanus mupinensis NC008753  | Panthera onca NC022842 1             | 0,19024585 |
| Ursus arctos AP012576 6               | Felis chaus NC028307 1               | 0,19025187 |
| Mungos mungo MMC7 1                   | Lycalopex secureus KT448284 1        | 0,19025733 |
| Ursus arctos AP012576 6               | Mephitis mephitis NC020648 1         | 0,19026206 |
| Vulpes lagopus NC026529 3             | Martes flavigula NC012141 3          | 0,19026224 |
| Vulpes lagopus NC026529 3             | Eumetopias jubatus NC004030 10       | 0,19026318 |
| Panthera tigris NC010642 35           | Canis mesomelas KT448280 1           | 0,19026387 |
| Spilogale putorius NC010497 1         | Lycalopex secureus KT448284 1        | 0,19026548 |
| Panthera pardus NC010641 5            | Martes americana NC020642 1          | 0,19026682 |
| Panthera uncia KP202269 3             | Gulo gulo NC009685 3                 | 0,19026749 |
| Ursus maritimus GU573488 Svalbard     | Lycalopex secureus KT448284 1        | 0,19026925 |
| Canis latrans NC008093 7              | Callorhinus ursinus NC008415 1       | 0,19027482 |
| Urva brachyura KY117547 1             | Arctocepalus townsendi NC008420 1    | 0,19027524 |
| Urva javanica T413 1                  | Arctocepalus townsendi NC008420 1    | 0,19027539 |
| Attilax paludinosus T606 1            | Ailuurus fulgens NC011124 1          | 0,19027762 |
| Vulpes ferrillata NC027935 1          | Cynictis penicillata T375 1          | 0,19027802 |
| Lontra canadensis SRR10409165 1       | Canis anthus NC027956 2              | 0,19027816 |
| Lycalopex secureus KT448284 1         | Bassariscus sumichrasti SRX1099089 1 | 0,19027853 |
| Bdeogale nigripes GLC15 1             | Ailuurus fulgens NC011124 1          | 0,19027853 |
| Suricata suricatta SSM10 1            | Neophoca cinerea NC008419 1          | 0,19027868 |
| Prionodon linsang ERR2391707 1        | Mustela eversmanni NC028013 1        | 0,19027959 |
| Otocyon megalotis SAF1 2              | Urva javanica T413 1                 | 0,19028662 |
| Otocyon megalotis SAF1 2              | Galerella sanguinea T378 1           | 0,19028702 |
| Ursus arctos pruinosus MG066703 3     | Conepatus chinga NC042596 1          | 0,19028758 |
| Melogale moschata V0735A 1            | Lycan pictus NC028427 2              | 0,19028999 |
| Vulpes corsac NC023958 1              | Panthera onca KP202264 2             | 0,19029024 |
| Suricata suricatta SSM10 1            | Ictonyx striatus T299 1              | 0,19029069 |
| Viverricula indica KX891751 1         | Neophoca cinerea NC008419 1          | 0,19029085 |
| Otocyon megalotis SAF1 2              | Aonyx cinerea NC035814 2             | 0,19029114 |
| Ursus arctos GU573491 207             | Galidia elegans D146 1               | 0,19029269 |
| Panthera onca KP202264 2              | Lontra canadensis SRR10409165 1      | 0,19029276 |
| Urocyon littoralis catalinae KP129018 | Felis silvestris lybica KP202275 4   | 0,19029322 |
| Viverricula indica NC025296 2         | Lutrogale perspicillata NC035811 1   | 0,19029382 |
| Mephitis mephitis NC020648 1          | Arctocepalus townsendi NC008420 1    | 0,190294   |
| Ichneumia albicauda T603 1            | Ailuurus fulgens NC011124 1          | 0,19029433 |
| Crocota crocata NC020670 3            | Arctonyx collaris NC020645 1         | 0,19029538 |
| Speothos venaticus C48 2              | Melogale moschata NC020644 1         | 0,19029778 |
| Panthera onca KP202264 2              | Otaria byronia OTAB 1                | 0,19029814 |
| Vulpes corsac NC023958 1              | Ursus thibetanus formosanus NC0093   | 0,19029836 |
| Vulpes corsac NC023958 1              | Panthera tigris NC010642 35          | 0,19029848 |
| Vulpes ferrillata NC027935 1          | Ursus thibetanus laniger MH281753 2  | 0,19030114 |
| Ursus arctos GU573491 207             | Felis catus NC001700 2               | 0,19030273 |
| Ursus maritimus NC003428 31           | Felis catus NC001700 2               | 0,19030297 |
| Proteles cristata T393 6              | Martes pennanti NC020664 16          | 0,19030401 |
| Panthera uncia KP202269 3             | Lycan pictus NC028427 2              | 0,19030404 |
| Mustela nivalis T306 5                | Crocota crocata NC020670 3           | 0,19030562 |
| Prionodon linsang ERR2391707 1        | Mephitis mephitis NC020648 1         | 0,19030645 |

|                                        |                                       |            |
|----------------------------------------|---------------------------------------|------------|
| Martes martes T302 3                   | Lynx pardinus NC028319 161            | 0,17595422 |
| Phoca groenlandica NC008429 54         | Felis nigripes NC028309 1             | 0,17595626 |
| Neovison vison NC020641 3              | Genetta servalina NC024568 2          | 0,17595671 |
| Prionodon pardicolor NC024569 2        | Hydrurga leptonyx NC008425 1          | 0,17595686 |
| Pusa hispida NC 008433 1               | Panthera uncia KP202269 1             | 0,17595994 |
| Phoca vitulina NC001325 1              | Genetta genetta T297 1                | 0,17596017 |
| Phoca largha NC008430 1                | Cryptoprocta ferox CFC13 1            | 0,17596181 |
| Phoca vitulina NC001325 1              | Otocolobus manul NC028323 1           | 0,17596333 |
| Zalophus californianus NC008416 1      | Mustela frenata NC020640 1            | 0,17596546 |
| Martes foina NC020643 1                | Homotherium latidens MF871702 3       | 0,17596905 |
| Ommatophoca rossii AY377287etc 1       | Ailurus fulgens styani NC009691 1     | 0,17597282 |
| Mustela altaica NC021751 1             | Monachus monachus NC044972 5          | 0,17597553 |
| Ursus spelaeus NC011112 8              | Ommatophoca rossii AY377287etc 1      | 0,17597914 |
| Monachus schauinslandi NC008421 1      | Urva javanica/auropunctata NC006835 1 | 0,17597987 |
| Halichoerus grypus NC001602 2          | Crossarchus platycephalus C7R66 1     | 0,17598452 |
| Leopardus pardalis NC028315 1          | Canis adustus KT448271 1              | 0,17598896 |
| Monachus monachus NC0044972 5          | Mephitis mephitis NC020648 1          | 0,17599134 |
| Halichoerus grypus NC001602 2          | Felis nigripes NC028309 1             | 0,17599908 |
| Bassaricyon neblina SRX1097850 1       | Aonyx cinerea NC035814 2              | 0,17600083 |
| Cystophora cristata NC008427 1         | Canis latrans NC008093 7              | 0,17600419 |
| Panthera onca KP202264 2               | Erigonathus barbatus NC008426 1       | 0,17601342 |
| Prionailurus bengalensis NC028301 12   | Mustela erminea T305 2                | 0,17601602 |
| Ursus thibetanus thibetanus NC011118 4 | Ommatophoca rossii AY377287etc 1      | 0,17601842 |
| Hydrurga leptonyx NC008425 1           | Galidia elegans D146 1                | 0,17602065 |
| Phoca groenlandica NC008429 54         | Felis catus NC001700 2                | 0,17602314 |
| Ursus spelaeus NC011112 8              | Potos flavus T414 1                   | 0,17602605 |
| Ursus thibetanus formosanus NC009331 1 | Meles meles T303 3                    | 0,17602703 |
| Monachus monachus NC0044972 5          | Canis aureus KT448274 1               | 0,17602758 |
| Viverricula indica XK891745 1          | Neovison vison NC020641 3             | 0,17602991 |
| Pusa caspica NC008431 1                | Urva javanica/auropunctata NC006835 1 | 0,17603351 |
| Monachus monachus NC0044972 5          | Urva semitorquata MH464789 1          | 0,17603393 |
| Puma yagouaroundi NC028311 1           | Ommatophoca rossii AY377287etc 1      | 0,17604424 |
| Pusa caspica NC008431 1                | Civettictis civetta NC033378 1        | 0,17604929 |
| Martes melampus NC009678 1             | Callorhinus ursinus NC008415 1        | 0,17606254 |
| Ommatophoca rossii AY377287etc 1       | Genetta servalina NC024568 2          | 0,17606477 |
| Mustela kathiah NC023210 1             | Hemigalus derbyanus MH464791 1        | 0,17606528 |
| Prionailurus planiceps NC028312 6      | Halichoerus grypus NC001602 2         | 0,17606644 |
| Pusa caspica NC008431 1                | Cynictis penicillata T375 1           | 0,17607056 |
| Pusa caspica NC008431 1                | Mungos mungo/gambianus SRR7704821 1   | 0,17607056 |
| Cynogale bennetti KY117544 1           | Crocota crocata NC020670 3            | 0,17608142 |
| Viverra tangalunga MH464792 1          | Prionailurus bengalensis NC028301 12  | 0,17608171 |
| Prionailurus rubiginosus NC028304 2    | Mustela erminea T305 2                | 0,17608342 |
| Pusa sibirica NC008432 2               | Ichneumia albicauda T603 1            | 0,17608385 |
| Erigonathus barbatus NC008426 1        | Diplogale hosei MH464790 1            | 0,17608616 |
| Phoca largha NC008430 1                | Mungos mungo MMC7 1                   | 0,17608647 |
| Taxidea taxus NC020646 1               | Leopardus pardalis NC028315 1         | 0,17608665 |
| Vulpes zerdia KJ603240 1               | Lobodon carcinophaga NC008423 1       | 0,17608836 |
| Ommatophoca rossii AY377287etc 1       | Felis nigripes NC028309 1             | 0,17609078 |
| Viverra zibetha T609 1                 | Phoca vitulina NC001325 1             | 0,17609223 |
| Neovison vison NC020641 3              | Canis adustus KT448271 1              | 0,17609338 |
| Poecilogale albinocha T602 1           | Phoca groenlandica NC008429 54        | 0,17609382 |
| Pusa hispida NC 008433 1               | Parahyaena brunnea NC038159 15        | 0,17609932 |
| Prionailurus bengalensis NC028301 12   | Canis adustus KT448271 1              | 0,17610103 |
| Diplogale hosei MH464790 1             | Canis adustus KT448271 1              | 0,17610438 |
| Mirounga leonina NC008422 1            | Canis lupus chanco NC010340 4         | 0,17611022 |
| Meles leucurus NC039173 4              | Bassaricyon neblina SRX1097850 1      | 0,17613091 |
| Nandinia binotata NC024567 1           | Melogale moschata V0735A 1            | 0,17613436 |
| Nandinia binotata NC024567 1           | Melogale moschata KP726273 1          | 0,17613442 |
| Erigonathus barbatus NC008426 1        | Canis latrans NC008093 7              | 0,17613901 |
| Viverricula indica XK891745 1          | Canis aureus KT448274 1               | 0,17614295 |
| Panthera onca KP202264 2               | Mirounga leonina NC008422 1           | 0,17614557 |
| Arctodus simus NC011116 1              | Arctocepalus forsteri KT693377 17     | 0,17614645 |
| Mustela frenata NC020640 1             | Felis silvestris lybica KP202275 4    | 0,17614742 |
| Viverricula indica XK891751 1          | Mustela kathiah NC023210 1            | 0,17614864 |
| Mirounga angustirostris SRR10331586 1  | Eupleres goudotii D128 1              | 0,17614883 |
| Taxidea taxus NC020646 1               | Prionailurus bengalensis NC028301 12  | 0,17615017 |
| Taxidea taxus NC020646 1               | Prionailurus rubiginosus NC028304 2   | 0,17615034 |
| Arctodus simus NC011116 1              | Arctocepalus pusillus NC008417 1      | 0,17615354 |
| Pusa sibirica NC008432 2               | Parahyaena brunnea NC038159 15        | 0,17615423 |
| Prionailurus bengalensis CKM45 20      | Mustela erminea T305 2                | 0,17615555 |
| Panthera tigris NC010642 35            | Leptonychotes weddellii NC008424 1    | 0,17615643 |
| Phoca groenlandica NC008429 54         | Felis chaus NC028307 1                | 0,17615862 |
| Mirounga angustirostris SRR10331586 1  | Catopuma temminckii NC027115 41       | 0,1761613  |
| Pusa hispida NC 008433 1               | Panthera pardus japonensis KJ866876 8 | 0,17616199 |
| Ommatophoca rossii AY377287etc 1       | Martes martes T302 3                  | 0,17616253 |
| Ursus thibetanus laniger MH281753 2    | Meles meles T303 3                    | 0,17616367 |
| Monachus monachus NC0044972 5          | Martes americana NC020642 1           | 0,17616685 |
| Halichoerus grypus NC001602 2          | Civettictis civetta NC033378 1        | 0,17616734 |
| Taxidea taxus NC020646 1               | Spilogale putorius NC010497 1         | 0,17617249 |
| Ommatophoca rossii AY377287etc 1       | Lynx pardinus NC028319 161            | 0,17618252 |
| Genetta abyssinica MG489822 1          | Arctonox collaris NC020645 1          | 0,17618787 |
| Leptonychotes weddellii NC008424 1     | Tapirus terrestris T358               | 0,17619088 |
| Halichoerus grypus NC001602 2          | Caracal caracal NC028306 1            | 0,17619973 |
| Bassaricyon neblina SRX1097850 1       | Arctonox collaris NC020645 1          | 0,17619997 |
| Ommatophoca rossii AY377287etc 1       | Canis adustus KT448271 1              | 0,17620085 |
| Mustela frenata NC020640 1             | Genetta abyssinica MG489822 1         | 0,17620188 |
| Prionodon pardicolor NC024569 2        | Canis adustus KT448271 1              | 0,17620756 |
| Lynx lynx NC027083 4                   | Canis adustus KT448271 1              | 0,17620799 |
| Galidictis fasciata DM333 1            | Erigonathus barbatus NC008426 1       | 0,17620896 |
| Mirounga leonina NC008422 1            | Galidictis fasciata DM333 1           | 0,17621006 |
| Paradoxurus hermaphroditus NC039591 1  | Leptonychotes weddellii NC008424 1    | 0,17621435 |
| Pusa caspica NC008431 1                | Genetta servalina NC024568 2          | 0,17621474 |
| Pusa caspica NC008431 1                | Galerella sanguinea T378 1            | 0,17621502 |
| Phoca groenlandica NC008429 54         | Crossarchus platycephalus C7R66 1     | 0,17621544 |
| Taxidea taxus NC020646 1               | Otaria byronia OTAB 1                 | 0,17621651 |
| Mustela erminea T305 2                 | Leopardus jacobita NC028322 1         | 0,17621817 |
| Pusa caspica NC008431 1                | Pardofelis marmorata NLN3 2           | 0,17621833 |
| Phoca largha NC008430 1                | Eupleres goudotii D128 1              | 0,17621993 |
| Taxidea taxus NC020646 1               | Leopardus pardalis T262 1             | 0,17622069 |
| Zalophus wollebaeki SRR4431565 1       | Mustela frenata NC020640 1            | 0,17622077 |
| Paradoxurus hermaphroditus NC039591 1  | Lobodon carcinophaga NC008423 1       | 0,1762214  |
| Taxidea taxus NC020646 1               | Leopardus geoffroyi NC028320 1        | 0,17622207 |
| Otocolobus manul NC028323 1            | Monachus schauinslandi NC008421 1     | 0,17622496 |

|                                        |                                      |            |
|----------------------------------------|--------------------------------------|------------|
| Ursus arctos AP012576 6                | Bassaricyon neblina SRX1097850 1     | 0,19030987 |
| Paradoxurus hermaphroditus NLNC 1      | Galictis vittata T412 1              | 0,19031169 |
| Gulo gulo NC009685 3                   | Diplogale hosei MH464790 1           | 0,19031498 |
| Panthera leo NERO 19                   | Tapirus terrestris T358              | 0,19031624 |
| Ursus thibetanus laniger MH281753 2    | Speothos venaticus C48 2             | 0,19031829 |
| Tremarctos ornatus NC009969 2          | Canis lupus familiaris NC002008 1231 | 0,19031903 |
| Ursus americanus JX196366 3            | Mungos mungo MMC7 1                  | 0,19031955 |
| Panthera pardus japonensis KJ866876    | Canis mesomelas KT448280 1           | 0,19032101 |
| Vulpes corsac NC023958 1               | Panthera leo NERO 19                 | 0,19032125 |
| Ursus arctos AP012576 6                | Leopardus guigna NC028321 1          | 0,19032413 |
| Neofelis nebulosa NC008450 3           | Mustela sibirica AP017394 11         | 0,19032732 |
| Spilogale putorius NC010497 1          | Leopardus pardalis NC028315 1        | 0,1903294  |
| Urva brachyura KY117547 1              | Arctocepalus forsteri NC004023 28    | 0,19032983 |
| Spilogale putorius NC010497 1          | Prionailurus planiceps NC028312 6    | 0,19033073 |
| Panthera tigris amoyensis NC014770 2   | Canis mesomelas KT448280 1           | 0,19033249 |
| Ursus arctos GU573486 5                | Panthera leo NERO 19                 | 0,19034283 |
| Vulpes lagopus NC026529 3              | Eupleres goudotii D128 1             | 0,19034307 |
| Smilodon populator MF871700 1          | Bassaricyon neblina SRX1097850 1     | 0,19034319 |
| Vulpes lagopus NC026529 3              | Ichneumia albicauda T603 1           | 0,19034529 |
| Nasua nasua NC020647 1                 | Arctocepalus forsteri KT693377 17    | 0,19034557 |
| Mungos mungo/gambianus SRR7704821      | Bassaricyon neblina SRX1097850 1     | 0,19034559 |
| Vulpes zerdia KJ603240 1               | Attilax paludinosus T606 1           | 0,19034657 |
| Vulpes zerdia KJ603240 1               | Urva semitorquata MH464789 1         | 0,19034682 |
| Parahyaena brunnea NC038159 15         | Arctocepalus forsteri NC004023 28    | 0,1903477  |
| Mustela itatzi NC034330 19             | Cynogale bennetti KY117544 1         | 0,19034848 |
| Procyon lotor AB462049 4               | Helogale parvula SRR7637809 1        | 0,19034879 |
| Procyon lotor AB462046 3               | Helogale parvula SRR7637809 1        | 0,190349   |
| Ursus thibetanus mupinensis NC00879    | Eupleres goudotii D128 1             | 0,19035397 |
| Vulpes zerdia KJ603240 1               | Paguma larvata PDD511 2              | 0,19035544 |
| Lutrogale perspicillata NC035811 1     | Galerella sanguinea T378 1           | 0,19035622 |
| Viverricula indica XK891751 1          | Phocarcctos hookeri NC008418 1       | 0,19035691 |
| Ursus maritimus GU573488 Svalbard      | Mungos mungo/gambianus SRR7704821    | 0,19035712 |
| Urocyon cinereoargenteus NC026723 2    | Civettictis civetta GLC19 1          | 0,19035725 |
| Pardofelis marmorata NLN3 2            | Arctocepalus townsendii NC008420 1   | 0,19035795 |
| Lycan pictus NC028427 2                | Aonyx cinerea NC035814 2             | 0,19035868 |
| Martes zibellina NC011579 39           | Crocota crocata NC020670 3           | 0,19036008 |
| Phocarcctos hookeri NC008418 1         | Panthera onca KP202264 2             | 0,19036065 |
| Urocyon cinereoargenteus NC026723 2    | Prionailurus planiceps NC028312 6    | 0,19036093 |
| Phocarcctos hookeri NC008418 1         | Catopuma temminckii NC027115 41      | 0,1903612  |
| Genetta genetta T297 1                 | Aonyx cinerea NC035814 2             | 0,19036154 |
| Phocarcctos hookeri NC008418 1         | Felis nigripes NC028309 1            | 0,19036184 |
| Ursus arctos GU573491 207              | Canis latrans NC008093 7             | 0,19036216 |
| Parahyaena brunnea NC038159 15         | Canis latrans NC008093 7             | 0,19036283 |
| Procyon lotor AB462049 4               | Prionodon pardicolor NC024569 2      | 0,19036344 |
| Odobenus rosmarus NC004029 29          | Mustela putorius NC020638 4          | 0,19036676 |
| Panthera tigris amoyensis NC014770 2   | Arctocepalus townsendii NC008420 1   | 0,19036677 |
| Vulpes lagopus NC026529 3              | Helarctos malayanus NC009968 2       | 0,19036742 |
| Puma yagouaroundi NC028311 1           | Bassaricyon neblina SRX1097850 1     | 0,19036749 |
| Ursus maritimus GU573488 Svalbard      | Prionodon pardicolor NC024569 2      | 0,1903687  |
| Panthera onca NC022842 1               | Arctocepalus australis MG023139 1    | 0,1903694  |
| Proteles cristata T393 6               | Melogale moschata NC020644 1         | 0,19037019 |
| Ursus spelaeus NC011112 8              | Prionodon lingsang ER2391707 1       | 0,19037028 |
| Ursus arctos pruinus MG066703 3        | Felis catus NC001700 2               | 0,19037038 |
| Ursus arctos EU497665 29               | Felis silvestris lybica KP202275 4   | 0,19037053 |
| Viverra tangalunga MH464792 1          | Panthera leo spelaea KX258452 2      | 0,19037341 |
| Ursus arctos GU573486 5                | Panthera uncia KP202269 1            | 0,19037549 |
| Parahyaena brunnea NC038159 15         | Canis aureus KT448274 1              | 0,19037643 |
| Zalophus wollebaeki SRR4431565 1       | Arctictis binturong T605 2           | 0,19038124 |
| Ursus thibetanus formosanus NC009331 1 | Speothos venaticus C48 2             | 0,19038254 |
| Ursus spelaeus NC011112 8              | Pardofelis marmorata NLN3 2          | 0,19038308 |
| Ursus arctos AP012576 6                | Galerella sanguinea T378 1           | 0,19038469 |
| Urva javanica/auropunctata NC006835    | Arctocepalus gazella BK010918 1      | 0,19038522 |
| Ursus thibetanus formosanus NC009331   | Proteles cristata T393 6             | 0,19038767 |
| Panthera onca NC022842 1               | Chrysocyon brachyurus NC014712 1     | 0,19038792 |
| Spilogale putorius NC010497 1          | Arctocepalus gazella BK010918 1      | 0,1903946  |
| Ursus americanus JX196366 3            | Lontra canadensis SRR10409165 1      | 0,19039474 |
| Eumetopias jubatus NC004030 10         | Canis anthus NC027956 2              | 0,19039598 |
| Spilogale putorius NC010497 1          | Canis anthus NC027956 2              | 0,1903961  |
| Conepatus chinga NC042596 1            | Attilax paludinosus T606 1           | 0,19039854 |
| Suricata suricatta SSM10 1             | Arctocepalus forsteri NC004023 28    | 0,19039869 |
| Mephitis mephitis NC020648 1           | Arctocepalus forsteri NC004023 28    | 0,19040054 |
| Salanoia concolor D378 1               | Cuon alpinus NC013445 3              | 0,19040054 |
| Cynictis penicillata T375 1            | Conepatus chinga NC042596 1          | 0,19040361 |
| Ichonyx striatus T299 1                | Canis lupus familiaris NC002008 1231 | 0,19040753 |
| Procyon lotor AB462046 3               | Eupleres goudotii D128 1             | 0,19041255 |
| Helogale parvula SRR7637809 1          | Ailurus fulgens NC011124 1           | 0,19041258 |
| Vulpes vulpes NC008434 5               | Urva brachyura KY117547 1            | 0,1904126  |
| Urocyon cinereoargenteus NC026723 2    | Enhydra lutris NC009692 1            | 0,19041333 |
| Vulpes zerdia KJ603240 1               | Helogale parvula SRR7637809 1        | 0,19041401 |
| Ursus arctos EU497665 29               | Conepatus chinga NC042596 1          | 0,19041543 |
| Mustela putorius NC020638 4            | Galidia elegans D146 1               | 0,19041586 |
| Tremarctos ornatus NC009969 2          | Galidia elegans D146 1               | 0,19041719 |
| Salanoia concolor D378 1               | Procyon lotor AB462046 3             | 0,1904195  |
| Vulpes ferrillata NC027935 1           | Arctotherium sp NC030174 1           | 0,19042125 |
| Panthera pardus japonensis KJ866876    | Meles anakuma NC009677 1             | 0,19042201 |
| Ursus thibetanus mupinensis NC00879    | Urva semitorquata MH464789 1         | 0,19042258 |
| Vulpes corsac NC023958 1               | Ursus thibetanus mupinensis NC00879  | 0,19042422 |
| Viverricula indica XK891745 1          | Lutrogale perspicillata NC035811 1   | 0,1904244  |
| Panthera pardus japonensis KJ866876    | Martes melampus NC009678 1           | 0,19042441 |
| Vulpes ferrillata NC027935 1           | Prionodon pardicolor NC024569 2      | 0,19042496 |
| Vulpes zerdia KJ603240 1               | Panthera onca KP202264 2             | 0,19042583 |
| Ursus maritimus NC003428 31            | Galidictis fasciata DM333 1          | 0,19042805 |
| Phocarcctos hookeri NC008418 1         | Felis catus NC001700 2               | 0,1904287  |
| Profelis aurata NC028299 1             | Lontra canadensis SRR10409165 1      | 0,1904289  |
| Proteles cristata T393 6               | Meles anakuma NC009677 1             | 0,19042931 |
| Zalophus wollebaeki SRR4431565 1       | Nasua nasua NC020647 1               | 0,19043024 |
| Mustela putorius NC020638 4            | Crocota crocata NC020670 3           | 0,19043052 |
| Pardofelis marmorata NLN3 2            | Lutrogale perspicillata NC035811 1   | 0,19043095 |
| Panthera leo spelaea KX258452 2        | Martes melampus NC009678 1           | 0,19043201 |
| Otocolobus manul NC020640 1            | Mustela altaica NC021751 1           | 0,19043316 |
| Proteles cristata T393 6               | Mustela itatzi NC034330 19           | 0,1904332  |
| Ursus thibetanus thibetanus NC011118   | Urva semitorquata MH464789 1         | 0,19043523 |
| Ursus arctos pruinus MG066703 3        | Bassaricyon neblina SRX1097850 1     | 0,19043528 |

|                                        |                                       |            |
|----------------------------------------|---------------------------------------|------------|
| Pardofelis marmorata NLN3 2            | Monachus schauinslandi NCO08421 1     | 0,17622638 |
| Phoca groenlandica NCO08429 54         | Leopardus geoffroyi NCO28320 1        | 0,17622909 |
| Pusa hispida NC 008433 1               | Cryptoprocta ferox CFC13 1            | 0,17622973 |
| Mirounga leonina NCO08422 1            | Arctictis binturong T605 2            | 0,17622977 |
| Pusa hispida NC 008433 1               | Panthera tigris NCO10642 35           | 0,17623773 |
| Phoca fasciata NCO08428 1              | Mephitis mephitis NCO20648 1          | 0,17624213 |
| Spilogale putorius NCO10497 1          | Meles anakuma NCO09677 1              | 0,17625098 |
| Monachus monachus NCO44972 5           | Chrysocyon brachyurus NCO24172 1      | 0,17625868 |
| Phoca vitulina NCO01325 1              | Civettictis civetta NCO33378 1        | 0,17626597 |
| Otocolobus manul NCO28323 1            | Halichoerus grypus NCO01602 2         | 0,17626712 |
| Callorhinus ursinus NCO08415 1         | Bassariscus sumichrasti SRX1099089 1  | 0,17627235 |
| Nandinia binotata NCO24567 1           | Arctocephalus pusillus NCO08417 1     | 0,17627633 |
| Paguma larvata PDD511 2                | Canis adustus KT448271 1              | 0,17628056 |
| Lutra lutra LC050126 1                 | Homotherium latidens MF871702 3       | 0,17628081 |
| Mustela frenata NCO20640 1             | Leptailurus serval NCO28316 1         | 0,17628148 |
| Phoca largha NCO08430 1                | Cynictis penicillata T375 1           | 0,17628588 |
| Phoca fasciata NCO08428 1              | Felis catus NCO01700 2                | 0,17629212 |
| Lynx rufus NCO14456 3                  | Canis adustus KT448271 1              | 0,17629285 |
| Phoca groenlandica NCO08429 54         | Ictonyx striatus T299 1               | 0,17629382 |
| Pusa hispida NC 008433 1               | Profelis aurata NCO28299 1            | 0,17629556 |
| Mustela erminea T305 2                 | Mephitis mephitis NCO20648 1          | 0,17629588 |
| Ommatophoca rossii AY377287etc 1       | Crossarchus platycephalus C7R66 1     | 0,17629839 |
| Phoca largha NCO08430 1                | Felis chaus NCO28307 1                | 0,17629901 |
| Panthera tigris amoyensis NCO14770 2   | Lobodon carcinophaga NCO08423 1       | 0,17630488 |
| Mungos mungo MMC7 1                    | Monachus monachus NCO44972 5          | 0,17630811 |
| Pusa hispida NC 008433 1               | Panthera leo spelaea KX258452 2       | 0,17630838 |
| Martes martes T302 3                   | Eumetopias jubatus NCO04030 10        | 0,17631522 |
| Ommatophoca rossii AY377287etc 1       | Lynx rufus NCO14456 3                 | 0,17633553 |
| Ommatophoca rossii AY377287etc 1       | Lynx rufus NCO14456 3                 | 0,17633854 |
| Vulpes vulpes NCO08434 5               | Erigonathus barbatus NCO08426 1       | 0,17634083 |
| Nandinia binotata NCO24567 1           | Aonyx cinerea NCO35814 2              | 0,17634426 |
| Enhydra lutris NCO09692 1              | Arctodus simus NCO11116 1             | 0,17634866 |
| Prionailurus bengalensis NCO28301 12   | Mustela frenata NCO20640 1            | 0,17634903 |
| Puma concolor NCO16470 22              | Mustela frenata NCO20640 1            | 0,17634906 |
| Mustela frenata NCO20640 1             | Leopardus wiedii NCO28318 1           | 0,17634943 |
| Poecilolage albinucha T602 1           | Nandinia binotata NCO24567 1          | 0,17635155 |
| Puma concolor NCO16470 22              | Mustela erminea T305 2                | 0,17635238 |
| Meles meles T303 3                     | Arctodus simus NCO11116 1             | 0,17635244 |
| Phoca vitulina NCO01325 1              | Mungos mungo MMC7 1                   | 0,17635588 |
| Pusa sibirica NCO08432 2               | Mephitis mephitis NCO20648 1          | 0,17635839 |
| Lycalopex secureus KT448284 1          | Leptonychotes weddellii NCO08424 1    | 0,17636079 |
| Phoca largha NCO08430 1                | Felis catus NCO01700 2                | 0,17636628 |
| Mustela nivalis T306 5                 | Homotherium latidens MF871702 3       | 0,1763802  |
| Mustela frenata NCO20640 1             | Homotherium latidens MF871702 3       | 0,17639174 |
| Ursus thibetanus formosanus NCO09331 1 | Ommatophoca rossii AY377287etc 1      | 0,17639686 |
| Erigonathus barbatus NCO08426 1        | Cynictis penicillata T375 1           | 0,17640722 |
| Arctonyx collaris NCO20645 1           | Arctocephalus pusillus NCO08417 1     | 0,17640862 |
| Nyctereutes procyonoides NCO13700 3    | Erigonathus barbatus NCO08426 1       | 0,17640918 |
| Pardofelis marmorata NLN3 2            | Mirounga leonina NCO08422 1           | 0,17641547 |
| Viverrina zibetha T609 1               | Pusa caspica NCO08431 1               | 0,17641641 |
| Viverricula indica KX891745 1          | Mustela erminea T305 2                | 0,17641887 |
| Phoca fasciata NCO08428 1              | Mungotictis decemlineata NCO27828 1   | 0,17641927 |
| Pusa caspica NCO08431 1                | Panthera pardus japonensis KJ866876 8 | 0,17641982 |
| Phoca groenlandica NCO08429 54         | Genetta genetta T297 1                | 0,17642052 |
| Vulpes corsac NCO23958 1               | Lobodon carcinophaga NCO08423 1       | 0,176422   |
| Pusa hispida NC 008433 1               | Galidictis fasciata DM333 1           | 0,17642239 |
| Pusa sibirica NCO08432 2               | Hyaina hyaina NCO20669 1              | 0,17642243 |
| Salanoia concolor D378 1               | Mirounga angustirostris SRR10331586 1 | 0,17642306 |
| Parahaena brunnea NCO38159 15          | Erigonathus barbatus NCO08426 1       | 0,17642336 |
| Ursus spelaeus EU327344 13             | Mustela erminea T305 2                | 0,17643945 |
| Martes zibellina NCO11579 39           | Eumetopias jubatus NCO04030 10        | 0,17644598 |
| Paguma larvata PDD511 2                | Monachus monachus NCO44972 5          | 0,17644668 |
| Monachus monachus NCO044972 5          | Ursa brachyura KY117547 1             | 0,17644781 |
| Ommatophoca rossii AY377287etc 1       | Mustela nivalis T306 5                | 0,17644851 |
| Ommatophoca rossii AY377287etc 1       | Martes zibellina NCO11579 39          | 0,17645009 |
| Meles leucurus NCO39173 4              | Callorhinus ursinus NCO08415 1        | 0,17645373 |
| Meles meles T303 3                     | Callorhinus ursinus NCO08415 1        | 0,17645657 |
| Lutra sumatrana NCO35810 1             | Callorhinus ursinus NCO08415 1        | 0,17646657 |
| Nandinia binotata NCO24567 1           | Callorhinus ursinus NCO08415 1        | 0,17647086 |
| Leopardus tigrinus NCO28317 1          | Halichoerus grypus NCO01602 2         | 0,17647344 |
| Mirounga leonina NCO08422 1            | Attilax paludinosus T606 1            | 0,17647456 |
| Procyon lotor AB462046 3               | Lutrogale perspicillata NCO35811 1    | 0,17647497 |
| Vulpes corsac NCO23958 1               | Leptonychotes weddellii NCO08424 1    | 0,17647497 |
| Mirounga leonina NCO08422 1            | Canis latrans NCO08093 7              | 0,17647699 |
| Taxidea taxus NCO20646 1               | Genetta servalina NCO24568 2          | 0,17648366 |
| Monachus monachus NCO44972 5           | Canis lupus chanco NCO10340 4         | 0,17648523 |
| Pusa sibirica NCO08432 2               | Genetta genetta T297 1                | 0,17648663 |
| Pusa sibirica NCO08432 2               | Panthera onca KP202264 2              | 0,17648721 |
| Pusa caspica NCO08431 1                | Felis nigripes NCO28309 1             | 0,17648792 |
| Mustela putorius NCO20638 4            | Arctodus simus NCO11116 1             | 0,17648998 |
| Pusa caspica NCO08431 1                | Leopardus tigrinus NCO28317 1         | 0,17649046 |
| Phoca largha NCO08430 1                | Galerella sanguinea T378 1            | 0,17649498 |
| Phoca vitulina NCO01325 1              | Cryptoprocta ferox CFC13 1            | 0,17650074 |
| Zalophus californianus NCO08416 1      | Arctonyx collaris NCO20645 1          | 0,17650197 |
| Ursus thibetanus laniger MH281753 2    | Mustela erminea T305 2                | 0,17650444 |
| Pusa hispida NC 008433 1               | Galictis vittata T412 1               | 0,17650929 |
| Spilogale putorius NCO10497 1          | Lutra sumatrana NCO35810 1            | 0,17651051 |
| Halichoerus grypus NCO01602 2          | Galerella sanguinea T378 1            | 0,17653231 |
| Arctonyx collaris NCO20645 1           | Arctocephalus forsteri KT693377 17    | 0,17653641 |
| Leopardus colocolo NCO28314 1          | Canis adustus KT448271 1              | 0,17653999 |
| Leopardus guigna NCO28321 1            | Halichoerus grypus NCO01602 2         | 0,17654042 |
| Mustela frenata NCO20640 1             | Arctocephalus gazella BK010918 1      | 0,17654111 |
| Mirounga leonina NCO08422 1            | Ursa javanica T413 1                  | 0,17654188 |
| Suricata suricatta S5M10 1             | Cystophora cristata NCO08427 1        | 0,17654188 |
| Ursa javanica T413 1                   | Erigonathus barbatus NCO08426 1       | 0,17654188 |
| Phoca groenlandica NCO08429 54         | Lontra canadensis SRR10409165 1       | 0,17654681 |
| Pardofelis marmorata NLN3 2            | Ommatophoca rossii AY377287etc 1      | 0,17654805 |
| Mustela frenata NCO20640 1             | Genetta servalina NCO24568 2          | 0,17654955 |
| Pusa hispida NC 008433 1               | Cynictis penicillata T375 1           | 0,17655127 |
| Mustela erminea T305 2                 | Lynx rufus NCO14456 3                 | 0,17655344 |
| Pusa caspica NCO08431 1                | Genetta genetta T297 1                | 0,17655347 |
| Ichneumia albicauda T603 1             | Erigonathus barbatus NCO08426 1       | 0,17655422 |
| Pusa hispida NC 008433 1               | Paguma larvata PDD511 2               | 0,17655763 |

|                                        |                                        |            |
|----------------------------------------|----------------------------------------|------------|
| Vulpes lagopus NCO26529 3              | Ursus spelaeus NCO11112 8              | 0,19043531 |
| Vulpes zerdia KJ603240 1               | Ursus thibetanus thibetanus NCO11118 1 | 0,1904356  |
| Martes pennanti NCO20664 16            | Crocota crocota NCO20670 3             | 0,19043642 |
| Ursus thibetanus mupinensis NCO0879 1  | Panthera uncia NCO10638 1              | 0,1904375  |
| Procyon lotor AB462049 4               | Panthera tigris NCO10642 35            | 0,19043933 |
| Zalophus californianus NCO08416 1      | Panthera uncia NCO10638 1              | 0,190441   |
| Ursus spelaeus EU327344 13             | Canis anthus NCO27956 2                | 0,19044217 |
| Paradoxurus hermaphroditus NCO3959 1   | Ailuropoda melanoleuca NCO09492 5      | 0,19044311 |
| Ursus thibetanus thibetanus NCO11112 8 | Canis latrans NCO08093 7               | 0,19044463 |
| Ursus spelaeus NCO11112 8              | Pardofelis marmorata NLN3 2            | 0,19044626 |
| Vulpes ferrilata NCO27935 1            | Lontra canadensis SRR10409165 1        | 0,19044676 |
| Zalophus californianus NCO08416 1      | Martes flavigula NCO12141 3            | 0,19044676 |
| Phoca largha NCO08430 1                | Canis lupus familiaris NCO02008 1231   | 0,19044669 |
| Lynx rufus NCO14456 3                  | Arctictis binturong T605 2             | 0,19046661 |
| Parahaena brunnea NCO38159 15          | Caracal caracal NCO28306 1             | 0,19046669 |
| Zalophus californianus NCO08416 1      | Canis aureus KT448274 1                | 0,19046779 |
| Spilogale putorius NCO10497 1          | Cuon alpinus NCO13445 3                | 0,19047077 |
| Ursus spelaeus NCO11112 8              | Cryptoprocta ferox CFC13 1             | 0,19047272 |
| Vulpes ferrilata NCO27935 1            | Panthera leo NERO 19                   | 0,19047493 |
| Zalophus californianus NCO08416 1      | Lontra canadensis SRR10409165 1        | 0,19047493 |
| Phoca largha NCO08430 1                | Lontra canadensis SRR10409165 1        | 0,19047676 |
| Speothos venaticus C48 2               | Martes flavigula NCO12141 3            | 0,19047903 |
| Parahaena brunnea NCO38159 15          | Canis lupus familiaris NCO02008 1231   | 0,19047925 |
| Zalophus californianus NCO08416 1      | Arctictis binturong T605 2             | 0,19047925 |
| Spilogale putorius NCO10497 1          | Caracal caracal NCO28306 1             | 0,19047964 |
| Ursus spelaeus NCO11112 8              | Cryptoprocta ferox CFC13 1             | 0,19048102 |
| Procyon lotor AB462046 3               | Cuon alpinus NCO13445 3                | 0,19048315 |
| Pardofelis marmorata NLN3 2            | Arctocephalus forsteri NCO04023 28     | 0,19048327 |
| Ursus arctos isabellinus 1885 2        | Panthera pardus NCO10641 5             | 0,19048327 |
| Ommatophoca rossii AY377287etc 1       | Cuon alpinus NCO13445 3                | 0,19048485 |
| Nyctereutes procyonoides NCO13700 3    | Callorhinus ursinus NCO08415 1         | 0,19048531 |
| Vulpes lagopus NCO26529 3              | Meles leucurus NCO39173 4              | 0,19048536 |
| Lontra canadensis SRR10409165 1        | Galidia elegans D146 1                 | 0,19048636 |
| Melogale moschata V0735A 1             | Canis anthus NCO27956 2                | 0,19048697 |
| Urocyon littoralis catalinae KP129018  | Salanoia concolor D378 1               | 0,1904901  |
| Mustela nigripes NCO24942 1            | Cynogale bennetti KY117544 1           | 0,19049047 |
| Conepatus chinga NCO42596 1            | Canis latrans NCO08093 7               | 0,19049191 |
| Tremarctos ornatus NCO09969 2          | Canis latrans NCO08093 7               | 0,19049208 |
| Ursus thibetanus thibetanus NCO11112 8 | Ursa javanica/auropunctata NCO06835    | 0,19049214 |
| Canis anthus NCO27956 2                | Arctocephalus pusillus NCO08417 1      | 0,19049214 |
| Ursus thibetanus thibetanus NCO11112 8 | Arctocephalus townsendi NCO08420 1     | 0,19049323 |
| Canis anthus NCO27956 2                | Arctocephalus pusillus NCO08417 1      | 0,19049323 |
| Otocyon megalotis SAF 1 2              | Meles leucurus NCO39173 4              | 0,19049479 |
| Otocyon megalotis SAF 1 2              | Bdeogale nigripes GLC15 1              | 0,19049501 |
| Lycyon pictus NCO28427 2               | Arctocephalus australis MG023139 1     | 0,19049501 |
| Vulpes ferrilata NCO27935 1            | Martes pennanti NCO20664 16            | 0,19049501 |
| Urocyon littoralis catalinae KP129018  | Civettictis civetta GLC19 1            | 0,19049573 |
| Ursus thibetanus mupinensis NCO0879 1  | Attilax paludinosus T606 1             | 0,19049582 |
| Panthera uncia KP202269 1              | Arctocephalus townsendi NCO08420 1     | 0,19049582 |
| Felis nigripes NCO28309 1              | Arctocephalus townsendi NCO08420 1     | 0,19049582 |
| Ursus thibetanus formosanus NCO0933 1  | Cynogale bennetti KY117544 1           | 0,19049582 |
| Ursus maritimus GU573488 Svalbard      | Galidia elegans D146 1                 | 0,19049582 |
| Hyaina hyaina NCO20669 1               | Arctocephalus forsteri KT693377 17     | 0,19049582 |
| Phocaena phocaena NCO08418 1           | Pardofelis marmorata NLN3 2            | 0,19049582 |
| Xenogale naso C07XAR110 1              | Canis mesomelas KT448280 1             | 0,19049582 |
| Zalophus wolfebaeki SRR4431565 1       | Ursa javanica T413 1                   | 0,19049582 |
| Ursus arctos GU573486 5                | Mungos mungo/gambianus SRR77048        | 0,19049582 |
| Mephitis mephitis NCO20648 1           | Lontra canadensis SRR10409165 1        | 0,19049582 |
| Ursus arctos pruinusos MG066703 3      | Hyaina hyaina NCO20669 1               | 0,19050257 |
| Vulpes lagopus NCO26529 3              | Ursus spelaeus EU327344 13             | 0,19050257 |
| Proteles cristata T393 6               | Arctocephalus gazella BK010918 1       | 0,19050279 |
| Ursus maritimus GU573488 Svalbard      | Parahaena brunnea NCO38159 15          | 0,19050366 |
| Ursus arctos GU573491 207              | Panthera onca KP202264 2               | 0,19050366 |
| Ursus arctos pruinusos MG066703 3      | Felis silvestris Iybia KP202275 4      | 0,19050531 |
| Procyon lotor AB462049 4               | Chrysocyon brachyurus NCO24172 1       | 0,19050604 |
| Poecilolage albinucha T602 1           | Panthera tigris NCO10642 35            | 0,1905075  |
| Ursus arctos AP012576 6                | Mungos mungo MMC7 1                    | 0,19050817 |
| Panthera tigris amoyensis NCO14770 2   | Bassariscus sumichrasti SRX1099089 1   | 0,19050829 |
| Paradoxurus hermaphroditus NCO3959 1   | Otaria byronia OTAB 1                  | 0,1905091  |
| Otocyon megalotis SAF 1 2              | Arctictis binturong T605 2             | 0,19050947 |
| Panthera uncia NCO10638 1              | Chrysocyon brachyurus NCO24172 1       | 0,19051126 |
| Lycyon pictus NCO28427 2               | Galictis vittata T412 1                | 0,19051726 |
| Vulpes lagopus NCO26529 3              | Ursa javanica/auropunctata NCO06835    | 0,19051726 |
| Melogale moschata KP276273 1           | Canis mesomelas KT448280 1             | 0,19051968 |
| Ursus thibetanus thibetanus NCO11112 8 | Speothos venaticus C48 2               | 0,19052003 |
| Ursus spelaeus EU327344 13             | Cryptoprocta ferox CFC13 1             | 0,19052221 |
| Canis aureus KT448274 1                | Arctocephalus australis MG023139 1     | 0,19052297 |
| Nasua nasua NCO20647 1                 | Arctocephalus forsteri NCO04023 28     | 0,1905248  |
| Panthera onca NCO22842 1               | Helarctos malayanus NCO09968 2         | 0,19052644 |
| Paradoxurus hermaphroditus NLC 1       | Gulo gulo NCO09685 3                   | 0,19052656 |
| Vulpes corsac NCO23958 1               | Neofelis nebulosa NCO08450 3           | 0,19052698 |
| Ursus thibetanus formosanus NCO0933 1  | Chrysocyon brachyurus NCO24172 1       | 0,19052748 |
| Neofelis nebulosa NCO08450 3           | Mustela sibirica NCO20637 6            | 0,1905296  |
| Vulpes corsac NCO23958 1               | Eumetopias jubatus NCO04030 10         | 0,19053197 |
| Lycalopex secureus KT448284 1          | Eupleres goudotii D128 1               | 0,19053514 |
| Vulpes corsac NCO23958 1               | Xenogale naso C07XAR110 1              | 0,19054668 |
| Vulpes vulpes NCO08434 5               | Helogale parvula SRR7637809 1          | 0,190547   |
| Vulpes vulpes NCO08434 5               | Neophoca cinerea NCO08419 1            | 0,19055097 |
| Galidictis fasciata DM333 1            | Ailuurus fulgens NCO11124 1            | 0,19055261 |
| Melogale moschata NCO20644 1           | Cynogale bennetti KY117544 1           | 0,19055383 |
| Helogale parvula SRR7637809 1          | Arctotherium sp NCO30174 1             | 0,19055495 |
| Lontra canadensis SRR10409165 1        | Cryptoprocta ferox CFC13 1             | 0,19055496 |
| Cryptoprocta ferox CFC13 1             | Canis latrans NCO08093 7               | 0,19055665 |
| Speothos venaticus C48 2               | Potos flavus T414 1                    | 0,19055781 |
| Tremarctos ornatus NCO09969 2          | Hyaina hyaina NCO20669 1               | 0,19055793 |
| Ursus arctos EU497665 29               | Helogale parvula SRR7637809 1          | 0,19055912 |
| Speothos venaticus C48 2               | Bdeogale nigripes GLC15 1              | 0,19056009 |
| Panthera pardus japonensis KJ866876    | Martes americana NCO20642 1            | 0,19056071 |
| Panthera uncia KP202269 1              | Martes zibellina NCO11579 39           | 0,19056107 |
| Otocyon megalotis SAF 1 2              | Arctocephalus pusillus NCO08417 1      | 0,19056113 |
| Ursus maritimus NCO09428 31            | Galidia elegans D146 1                 | 0,19056205 |
| Urocyon littoralis catalinae KP129018  | Felis margarita NCO28308 1             | 0,19056301 |
| Hyaina hyaina NCO20669 1               | Arctocephalus gazella BK010918 1       | 0,19056372 |
| Neophoca cinerea NCO08419 1            | Hyaina hyaina NCO20669 1               | 0,19056396 |
| Mustela sibirica AP017394 11           | Crocota crocota NCO20670 3             | 0,19056499 |
| Ursus arctos pruinusos MG066703 3      | Helogale parvula SRR7637809 1          | 0,19056551 |
| Tremarctos ornatus NCO09969 2          | Panthera leo spelaea KX258452 2        | 0,19056749 |
| Ursus arctos isabellinus 1885 2        | Cryptoprocta ferox CFC13 1             | 0,19056767 |
| Panthera tigris amoyensis NCO14770 2   | Mustela sibirica AP017394              |            |

|                                        |                                       |            |
|----------------------------------------|---------------------------------------|------------|
| Salanoia concolor D378 1               | Monachus schauinslandi NCO08421 1     | 0,17655905 |
| Viverricula indica KX891745 1          | Arctodus simus NCO11116 1             | 0,17656024 |
| Phoca largha NCO08430 1                | Galidictis fasciata DM333 1           | 0,17656028 |
| Phoca fasciata NCO08428 1              | Felis chaus NCO28307 1                | 0,17656229 |
| Profelis aurata NCO28299 1             | Phoca groenlandica NCO08429 54        | 0,1765635  |
| Phoca vitulina NCO01325 1              | Galerella sanguinea T378 1            | 0,17656529 |
| Eumetopias jubatus NCO04030 10         | Ailurus fulgens styani NCO09691 1     | 0,17658247 |
| Spilogale putorius NCO10497 1          | Cystophora cristata NCO08427 1        | 0,17658414 |
| Lutra lutra NCO11358 9                 | Callorhinus ursinus NCO08415 1        | 0,17658981 |
| Halichoerus grypus NCO01602 2          | Catopuma temminckii NCO27115 41       | 0,17659947 |
| Viverra tangalunga MH464792 1          | Canis adustus KT448271 1              | 0,17660083 |
| Halichoerus grypus NCO01602 2          | Civettictis civetta GLC19 1           | 0,17660198 |
| Cynictis penicillata T375 1            | Canis adustus KT448271 1              | 0,17660229 |
| Spilogale putorius NCO10497 1          | Bassariscus sumichrasti SRX1099089 1  | 0,17660433 |
| Lobodon carcinophaga NCO08423 1        | Cuon alpinus NCO13445 3               | 0,17660511 |
| Nandinia binotata NCO24567 1           | Lontra canadensis SRR10409165 1       | 0,17660576 |
| Viverra tangalunga MH464792 1          | Chrotogale owstoni T607 1             | 0,17660579 |
| Ommatophoca rossii AY377287etc 1       | Martes americana NCO20642 1           | 0,17660853 |
| Pusa sibirica NCO08432 2               | Bdeogale nigripes GLC15 1             | 0,17660922 |
| Pusa sibirica NCO08432 2               | Mungos mungo/gambianus SRR7704821 1   | 0,17660922 |
| Suricata suricatta SSM10 1             | Erigonathus barbatus NCO08426 1       | 0,17660922 |
| Pusa caspica NCO08431 1                | Canis latrans NCO08093 7              | 0,17660965 |
| Mustela erminea T305 2                 | Canis aureus KT448274 1               | 0,1766109  |
| Pusa caspica NCO08431 1                | Galidictis fasciata DM333 1           | 0,17661242 |
| Puma concolor NCO16470 22              | Meles leucurus NCO39173 4             | 0,17661616 |
| Paradoxurus jerdoni MH464793 1         | Erigonathus barbatus NCO08426 1       | 0,17661822 |
| Taxidea taxus NCO20646 1               | Caracal caracal NCO28306 1            | 0,17662144 |
| Phoca largha NCO08430 1                | Urva semitorquata MH464789 1          | 0,17662354 |
| Panthera onca KP202264 2               | Mirounga angustirostris SRR10331586 1 | 0,17662981 |
| Phoca fasciata NCO08428 1              | Hyaena hyaena NCO20669 1              | 0,17663196 |
| Otocyon megalotis SAF1 2               | Hydrurga leptonyx NCO08425 1          | 0,17663299 |
| Phoca groenlandica NCO08429 54         | Mephitis mephitis NCO20648 1          | 0,17663974 |
| Mirounga angustirostris SRR10331586 1  | Mephitis mephitis NCO20648 1          | 0,17664073 |
| Mustela frenata NCO20640 1             | Eumetopias jubatus NCO04030 10        | 0,17664793 |
| Mustela sibirica NCO20637 6            | Homotherium latidens MF871702 3       | 0,17665085 |
| Ommatophoca rossii AY377287etc 1       | Ailurus fulgens NCO11124 1            | 0,17665341 |
| Phoca vitulina NCO01325 1              | Urva javanica/auropunctata NCO06835 1 | 0,17665555 |
| Neovison vison NCO20641 3              | Homotherium latidens MF871702 3       | 0,17665821 |
| Martes melampus NCO09678 1             | Arctodus simus NCO11116 1             | 0,17668264 |
| Prionailurus rubiginosus NCO28304 2    | Mustela frenata NCO20640 1            | 0,17668568 |
| Viverra zibetha T609 1                 | Pusa sibirica NCO08432 2              | 0,17668574 |
| Phoca vitulina NCO01325 1              | Eupleres goudotii D128 1              | 0,17669122 |
| Ursus thibetanus formosanus NCO09331 1 | Potos flavus T414 1                   | 0,17669699 |
| Panthera onca NCO28242 1               | Erigonathus barbatus NCO08426 1       | 0,17669858 |
| Potos flavus T414 1                    | Homotherium latidens MF871702 3       | 0,17669909 |
| Ursus thibetanus thibetanus NCO11118 4 | Potos flavus T414 1                   | 0,17669977 |
| Phoca vitulina NCO01325 1              | Panthera uncia KP202269 1             | 0,17670242 |
| Paradoxurus hermaphroditus NLNC 1      | Mirounga angustirostris SRR10331586 1 | 0,17670296 |
| Paradoxurus hermaphroditus NLNC 1      | Neovison vison NCO20641 3             | 0,17670438 |
| Zalophus californianus NCO08416 1      | Nandinia binotata NCO24567 1          | 0,17670746 |
| Pusa sibirica NCO08432 2               | Urva javanica/auropunctata NCO06835 1 | 0,17670694 |
| Mustela frenata NCO20640 1             | Canis lupus familiaris NCO02008 1231  | 0,17671032 |
| Mirounga angustirostris SRR10331586 1  | Galidictis vittata T412 1             | 0,17671071 |
| Zalophus californianus NCO08416 1      | Bassariscus sumichrasti SRX1099089 1  | 0,17671154 |
| Nandinia binotata NCO24567 1           | Eumetopias jubatus NCO04030 10        | 0,1767152  |
| Spilogale putorius NCO10497 1          | Mustela kathiah NCO23210 1            | 0,17672007 |
| Phoca largha NCO08430 1                | Urva javanica/auropunctata NCO06835 1 | 0,17672276 |
| Prionailurus viverrinus NCO28305 1     | Ommatophoca rossii AY377287etc 1      | 0,17672525 |
| Lutra lutra LC050126 1                 | Callorhinus ursinus NCO08415 1        | 0,17673391 |
| Neofelis nebulosa NCO08450 3           | Hydrurga leptonyx NCO08425 1          | 0,17673405 |
| Mustela frenata NCO20640 1             | Arctocepalus forsteri KT693377 17     | 0,17674215 |
| Monachus monachus NCO44972 5           | Canis lupus familiaris NCO02008 1231  | 0,17674299 |
| Melogale moschata V0735A 1             | Ailurus fulgens NCO11124 1            | 0,17674322 |
| Helogale parvula SRR7637809 1          | Erigonathus barbatus NCO08426 1       | 0,17674388 |
| Pusa caspica NCO08431 1                | Cryptoprocta ferox CFC13 1            | 0,17675519 |
| Taxidea taxus NCO20646 1               | Puma yagouaroundi NCO28311 1          | 0,17675574 |
| Pusa caspica NCO08431 1                | Ichneumia albicauda T603 1            | 0,17675725 |
| Vulpes lagopus NCO26529 3              | Hydrurga leptonyx NCO08425 1          | 0,17675871 |
| Phoca vitulina NCO01325 1              | Mungotictis decemlineata NCO27828 1   | 0,17676105 |
| Zalophus wollebaeki SRR4431565 1       | Bassariscus sumichrasti SRX1099089 1  | 0,17676473 |
| Leopardus pardalis T262 1              | Canis adustus KT448271 1              | 0,17676502 |
| Phoca groenlandica NCO08429 54         | Otocolobus manul NCO28323 1           | 0,17676558 |
| Mustela altaica NCO21751 1             | Homotherium latidens MF871702 3       | 0,17677012 |
| Mustela kathiah NCO23210 1             | Leopardus colocolo NCO28314 1         | 0,17677177 |
| Mephitis mephitis NCO20648 1           | Meles meles T303 3                    | 0,17677179 |
| Gulo gulo NCO09685 3                   | Callorhinus ursinus NCO08415 1        | 0,17677408 |
| Lutra lutra LC050126 1                 | Eumetopias jubatus NCO04030 10        | 0,17677638 |
| Hemigalus derbyanus MH464791 1         | Canis aureus KT448274 1               | 0,17679241 |
| Gulo gulo NCO09685 3                   | Arctotherium sp NCO30174 1            | 0,17680082 |
| Lutra lutra LC050126 1                 | Arctocepalus pusillus NCO08417 1      | 0,17680722 |
| Halichoerus grypus NCO01602 2          | Felis catus NCO01700 2                | 0,17680722 |
| Phoca largha NCO08430 1                | Conepatus chinga NCO42596 1           | 0,17681117 |
| Tremarctos ornatus NCO09969 2          | Nandinia binotata NCO24567 1          | 0,17681135 |
| Mirounga leonina NCO08422 1            | Bassariscus neblina SRX1097850 1      | 0,17681141 |
| Martes martes T302 3                   | Ailurus fulgens NCO11124 1            | 0,17681196 |
| Phocarcus hookeri NCO08418 1           | Bassariscus sumichrasti SRX1099089 1  | 0,17681336 |
| Viverricula indica NCO25296 2          | Canis aureus KT448274 1               | 0,1768194  |
| Meles leucurus NCO39173 4              | Genetta servalina NCO24568 2          | 0,17681941 |
| Urva javanica/auropunctata NCO06835 1  | Halichoerus grypus NCO01602 2         | 0,17682077 |
| Pusa hispida NC 008433 1               | Canis latrans NCO08093 7              | 0,17682207 |
| Mustela erminea T305 2                 | Leopardus tigrinus NCO28317 1         | 0,17682403 |
| Pusa sibirica NCO08432 2               | Panthera tigris NCO10642 35           | 0,17683202 |
| Monachus schauinslandi NCO08421 1      | Genetta genetta T297 1                | 0,17683344 |
| Mephitis mephitis NCO20648 1           | Arctonyc collaris NCO20645 1          | 0,17683385 |
| Martes americana NCO20642 1            | Homotherium latidens MF871702 3       | 0,17683798 |
| Ommatophoca rossii AY377287etc 1       | Mustela eversmanni NCO28013 1         | 0,17684111 |
| Phoca largha NCO08430 1                | Parahyaena brunnea NCO38159 15        | 0,17684208 |
| Mirounga angustirostris SRR10331586 1  | Arctictis binturong T605 2            | 0,17685279 |
| Lontra canadensis SRR10409165 1        | Halichoerus grypus NCO01602 2         | 0,17686157 |
| Viverra zibetha T609 1                 | Halichoerus grypus NCO01602 2         | 0,17686966 |
| Hydrurga leptonyx NCO08425 1           | Cuon alpinus NCO13445 3               | 0,17686993 |
| Catopuma temminckii NCO27115 41        | Canis adustus KT448271 1              | 0,17687173 |
| Mustela frenata NCO20640 1             | Callorhinus ursinus NCO08415 1        | 0,17687319 |

|                                        |                                      |            |
|----------------------------------------|--------------------------------------|------------|
| Vulpes corsac NCO23958 1               | Ursus spelaeus NCO11112 8            | 0,19057012 |
| Galictis vittata T412 1                | Cynictis penicillata T375 1          | 0,19057018 |
| Ursus arctos EU497665 29               | Prionodon pardicolor NCO24569 2      | 0,19057078 |
| Ursus thibetanus formosanus NCO09331 1 | Attilax paludinosus T606 1           | 0,19057101 |
| Ursus arctos pruinosus MG066703 3      | Panthera pardus japonensis KJ866876  | 0,19057147 |
| Panthera leo spelaea KX258452 2        | Martes martes T302 3                 | 0,19057164 |
| Ursus spelaeus EU327344 13             | Prionodon linsang ERR2391707 1       | 0,19057226 |
| Speothos venaticus C48 2               | Pardofelis marmorata NLN3 2          | 0,19057371 |
| Procyon lotor AB462049 4               | Panthera tigris amoyensis NCO14770 2 | 0,19057409 |
| Panthera tigris amoyensis NCO14770 2   | Arctotherium sp NCO30174 1           | 0,19057535 |
| Arctictis binturong T605 2             | Aonyx cinerea NCO35814 2             | 0,19057786 |
| Profelis aurata NCO28299 1             | Ailuropoda melanoleuca NCO09492 5    | 0,19058037 |
| Cynogale bennetti KY117544 1           | Panthera leo chanco NCO10340 4       | 0,19058302 |
| Ursus arctos GUS73491 207              | Mephitis mephitis NCO20648 1         | 0,19058412 |
| Ursus arctos EU497665 29               | Mephitis mephitis NCO20648 1         | 0,19058429 |
| Panthera uncia NCO10638 1              | Canis mesomelas KT448280 1           | 0,19058938 |
| Ursus arctos pruinosus MG066703 3      | Mephitis mephitis NCO20648 1         | 0,19059119 |
| Ursus spelaeus EU327344 13             | Panthera onca NCO22842 1             | 0,19059126 |
| Panthera leo NERO 19                   | Martes zibellina NCO11579 39         | 0,19059235 |
| Zalophus californianus NCO08416 1      | Crocota crocata NCO20670 3           | 0,19059959 |
| Vulpes zerda KJ603240 1                | Eumetopias jubatus NCO04030 10       | 0,19059993 |
| Urocyon littoralis catalinae KP129018  | Civettictis civetta NCO33378 1       | 0,19060017 |
| Poecilogale albinucha T602 1           | Panthera leo NERO 19                 | 0,19060268 |
| Otocyon megalotis SAF1 2               | Neofelis nebulosa NCO08450 3         | 0,19060336 |
| Neofelis nebulosa NCO08450 3           | Arctodus simus NCO11116 1            | 0,19060309 |
| Ursus arctos pruinosus MG066703 3      | Lycalopex schuaree KT448284 1        | 0,19060434 |
| Spilogale putorius NCO10497 1          | Neophoca cinerea NCO08419 1          | 0,19060481 |
| Suricata suricatta SSM10 1             | Arctonyc collaris NCO20645 1         | 0,19061122 |
| Lontra canadensis SRR10409165 1        | Bdeogale nigripes GLC15 1            | 0,19061221 |
| Melursus ursinus NCO09970 2            | Canis lupus familiaris NCO02008 1231 | 0,19061247 |
| Mungotictis decemlineata NCO27828      | Conepatus chinga NCO42596 1          | 0,19061396 |
| Vulpes lagopus NCO26529 3              | Urva javanica T413 1                 | 0,19061437 |
| Vulpes vulpes NCO08434 5               | Mungos mungo/MMC7 1                  | 0,19061461 |
| Vulpes vulpes NCO08434 5               | Mungos mungo/gambianus SRR77048      | 0,19061469 |
| Xenogale naso C07XAR110 1              | Ailurus fulgens styani NCO09691 1    | 0,19061475 |
| Vulpes vulpes NCO08434 5               | Tremarctos ornatus NCO09969 2        | 0,19061504 |
| Nyctereutes procyonoides NCO13700 3    | Melogale moschata V0735A 1           | 0,19061536 |
| Urocyon littoralis catalinae KP129018  | Meles leucurus NCO39173 4            | 0,1906167  |
| Urva javanica T413 1                   | Bassariscus neblina SRX1097850 1     | 0,19061695 |
| Lycalopex schuaree KT448284 1          | Helogale parvula SRR7637809 1        | 0,19061705 |
| Ursus arctos GUS73491 207              | Canis mesomelas KT448280 1           | 0,19061783 |
| Urva brachyura KY117547 1              | Canis mesomelas KT448280 1           | 0,19061913 |
| Mungotictis decemlineata NCO27828      | Ailurus fulgens NCO11124 1           | 0,19061972 |
| Ursus spelaeus EU327344 13             | Panthera pardus NCO10641 5           | 0,19061984 |
| Suricata suricatta SSM10 1             | Canis mesomelas KT448280 1           | 0,19062258 |
| Speothos venaticus C48 2               | Martes melampus NCO09678 1           | 0,19062321 |
| Speothos venaticus C48 2               | Melogale moschata KP726273 1         | 0,19062644 |
| Panthera uncia NCO10638 1              | Melogale moschata V0735A 1           | 0,19062726 |
| Ursus arctos isabellinus 1885 2        | Galidia elegans D146 1               | 0,19062953 |
| Urocyon littoralis catalinae KP129018  | Puma concolor NCO16470 22            | 0,19063018 |
| Mephitis mephitis NCO20648 1           | Arctocepalus australis MG023139 1    | 0,19063185 |
| Ursus arctos GUS73491 207              | Hyaena hyaena NCO20669 1             | 0,19063187 |
| Ursus arctos AP012576 6                | Conepatus chinga NCO42596 1          | 0,19063191 |
| Panthera tigris NCO10642 35            | Arctocepalus townsendi NCO08420 1    | 0,19063634 |
| Vulpes vulpes NCO08434 5               | Melursus ursinus NCO09970 2          | 0,19063781 |
| Ursus maritimus NCO03428 31            | Prionodon pardicolor NCO24569 2      | 0,19063802 |
| Galictis vittata T412 1                | Attilax paludinosus T606 1           | 0,19063807 |
| Ursus arctos EU497665 29               | Felis catus NCO01700 2               | 0,19063966 |
| Procyon lotor AB462049 4               | Odobenus rosmarus NCO04029 29        | 0,19064154 |
| Diplogale hosei MH464790 1             | Arctocepalus gazella BK010918 1      | 0,19064248 |
| Ursus maritimus NCO03428 31            | Lycaxon pictus NCO28427 2            | 0,19064309 |
| Ursus arctos GUS73486 5                | Prionodon pardicolor NCO24569 2      | 0,19064558 |
| Panthera tigris amoyensis NCO14770 2   | Neovison vison NCO20641 3            | 0,19064662 |
| Zalophus californianus NCO08416 1      | Vulpes corsac NCO23958 1             | 0,19064711 |
| Panthera leo spelaea KX258452 2        | Arctocepalus pusillus NCO08417 1     | 0,19064851 |
| Galerella sanguinea T378 1             | Ailuropoda melanoleuca NCO09492 5    | 0,19064915 |
| Ursus americanus JX196366 3            | Cynictis penicillata T375 1          | 0,19065738 |
| Ursus thibetanus thibetanus NCO11118 4 | Proteles cristata T393 6             | 0,19065893 |
| Mephitis mephitis NCO20648 1           | Lycaxon pictus NCO28427 2            | 0,19066007 |
| Urva javanica T413 1                   | Cuon alpinus NCO13445 3              | 0,19066016 |
| Ursus thibetanus laniger MH281753 2    | Panthera onca NCO22842 1             | 0,19066136 |
| Cuon alpinus NCO13445 3                | Bdeogale nigripes GLC15 1            | 0,19066621 |
| Xenogale naso C07XAR110 1              | Cuon alpinus NCO13445 3              | 0,19066623 |
| Spilogale putorius NCO10497 1          | Genetta genetta T297 1               | 0,19067369 |
| Ichneumia albicauda T603 1             | Conepatus chinga NCO42596 1          | 0,19067568 |
| Vulpes ferrillata NCO27935 1           | Lutra lutra NCO11358 9               | 0,1906784  |
| Vulpes vulpes NCO08434 5               | Galerella sanguinea T378 1           | 0,1906812  |
| Vulpes corsac NCO23958 1               | Urva javanica T413 1                 | 0,19068161 |
| Suricata suricatta SSM10 1             | Ailurus fulgens NCO11124 1           | 0,19068229 |
| Vulpes corsac NCO23958 1               | Aonyx cinerea NCO35814 2             | 0,19068372 |
| Ursus thibetanus formosanus NCO09331 1 | Panthera leo NERO 19                 | 0,19068402 |
| Lutrogale perspicillata NCO35811 1     | Urva javanica T413 1                 | 0,19068435 |
| Lutrogale perspicillata NCO35811 1     | Galidia elegans D146 1               | 0,19068512 |
| Vulpes corsac NCO23958 1               | Procyon lotor AB462046 3             | 0,19068784 |
| Urocyon cinereoargenteus NCO26723 3    | Mustela sibirica NCO20637 6          | 0,19068761 |
| Canis anthus NCO27956 2                | Ailurus fulgens NCO11124 1           | 0,19068836 |
| Urva javanica/auropunctata NCO06835 1  | Helarctos malayanus NCO09968 2       | 0,19068851 |
| Urocyon littoralis catalinae KP129018  | Taxidea taxus NCO20646 1             | 0,19069165 |
| Vulpes corsac NCO23958 1               | Ursus arctos isabellinus 1885 2      | 0,19069172 |
| Speothos venaticus C48 2               | Martes americana NCO20642 1          | 0,19069283 |
| Ursus maritimus NCO03428 31            | Mungos mungo/gambianus SRR77048      | 0,19069378 |
| Otocyon megalotis SAF1 2               | Mustela kathiah NCO23210 1           | 0,19069414 |
| Phocarcus hookeri NCO08418 1           | Diplogale hosei MH464790 1           | 0,19069837 |
| Ursus maritimus GUS73488 Svalbard      | Canis anthus NCO27956 2              | 0,19069871 |
| Odobenus rosmarus NCO04029 29          | Nandinia binotata NCO24567 1         | 0,19069979 |
| Melogale moschata NCO20644 1           | Ichneumia albicauda T603 1           | 0,19070007 |
| Ursus arctos isabellinus 1885 2        | Panthera uncia KP202269 1            | 0,19070546 |
| Suricata suricatta SSM10 1             | Melursus ursinus NCO09970 2          | 0,19070639 |
| Ursus spelaeus NCO11112 8              | Xenogale naso C07XAR110 1            | 0,19070663 |
| Panthera leo spelaea KX258452 2        | Meles anakuma NCO09677 1             | 0,19070742 |
| Ursus thibetanus thibetanus NCO11118 4 | Nyctereutes procyonoides NCO13700 3  | 0,19070882 |
| Mungotictis decemlineata NCO27828      | Galictis vittata T412 1              | 0,19071031 |
| Ursus arctos AP012576 6                | Helogale parvula SRR7637809 1        | 0,19071034 |



|                                        |                                       |            |
|----------------------------------------|---------------------------------------|------------|
| Ommatophoca rossii AY377287etc 1       | Acinonyx jubatus NC005212 3           | 0,17687652 |
| Otaria byronia OTAB 1                  | Lutra sumatrana NC035810 1            | 0,17687744 |
| Homotherium latidens MF871702 3        | Enhydra lutris NC009692 1             | 0,17688012 |
| Neovison vison NC020641 3              | Callorhinus ursinus NC008415 1        | 0,17688145 |
| Lynx pardinus NC028319 161             | Enhydra lutris NC009692 1             | 0,17688605 |
| Mirounga angustirostris SRR10331586 1  | Lontra canadensis SRR10409165 1       | 0,17688623 |
| Otocyon megalotis SAF1 2               | Leptonyx chotes weddellii NC008424 1  | 0,17688666 |
| Arctodus simus NC011116 1              | Arctocepalus australis MG023139 1     | 0,17688668 |
| Phoca fasciata NC008428 1              | Bassaricyon neblina SRX1097850 1      | 0,17688729 |
| Paradoxurus jerdoni MH464793 1         | Mirounga leonina NC008422 1           | 0,17688774 |
| Paradoxurus hermaphroditus NLNC 1      | Erigonathus barbatus NC008426 1       | 0,17688775 |
| Paradoxurus hermaphroditus NC039591 1  | Mirounga leonina NC008422 1           | 0,17688784 |
| Mustela frenata NC020640 1             | Felis margarita NC028308 1            | 0,17688815 |
| Phoca fasciata NC008428 1              | Bdeogale nigripes GLC15 1             | 0,17688882 |
| Viverra tangalunga MH464792 1          | Lynx pardinus NC028319 161            | 0,17688823 |
| Pusa caspica NC008431 1                | Civettictis civetta GLC19 1           | 0,17688824 |
| Pusa hispida NC 008433 1               | Bdeogale nigripes GLC15 1             | 0,17688886 |
| Otaria byronia OTAB 1                  | Bassaricyon sumichrasti SRX1099089 1  | 0,17688921 |
| Phoca groenlandica NC008429 54         | Paradoxurus hermaphroditus NLNC 1     | 0,17689045 |
| Pusa caspica NC008431 1                | Catopuma temminckii NC027115 41       | 0,17689073 |
| Prionailurus bengalensis NC028301 12   | Potos flavus T414 1                   | 0,17689109 |
| Monachus schauinslandi NC008421 1      | Canis latrans NC008093 7              | 0,17689218 |
| Phoca largha NC008430 1                | Mungos mungo/gambianus SRR7704821 1   | 0,17689227 |
| Pusa caspica NC008431 1                | Otocolobus manul NC028323 1           | 0,17689314 |
| Procyon lotor AB462049 4               | Monachus schauinslandi NC008421 1     | 0,17689432 |
| Taxidea taxus NC020646 1               | Leopardus guigna NC028321 1           | 0,17689551 |
| Erigonathus barbatus NC008426 1        | Chrysoyon brachyurus NC024172 1       | 0,17689686 |
| Ichonyx striatus T299 1                | Bassaricyon neblina SRX1097850 1      | 0,17689797 |
| Phoca groenlandica NC008429 54         | Caracal caracal NC028306 1            | 0,17690001 |
| Arctonyx collaris NC020645 1           | Arctictis binturong T605 2            | 0,17690168 |
| Paradoxurus jerdoni MH464793 1         | Mirounga angustirostris SRR10331586 1 | 0,17690502 |
| Mirounga leonina NC008422 1            | Lycalopex sechurae KT448284 1         | 0,17690711 |
| Prionailurus planiceps NC028312 6      | Ommatophoca rossii AY377287etc 1      | 0,17691138 |
| Eumetopias jubatus NC004030 10         | Arctonyx collaris NC020645 1          | 0,17691199 |
| Lutra sumatrana NC035810 1             | Eumetopias jubatus NC004030 10        | 0,17691214 |
| Mustela sibirica AP017394 11           | Homotherium latidens MF871702 3       | 0,17691776 |
| Otocolobus manul NC028323 1            | Ommatophoca rossii AY377287etc 1      | 0,17692399 |
| Ommatophoca rossii AY377287etc 1       | Genetta abyssinica MG489822 1         | 0,17693075 |
| Genetta abyssinica MG489822 1          | Canis adustus KT448271 1              | 0,1769326  |
| Martes flavigula NC012141 3            | Arctodus simus NC011116 1             | 0,17693871 |
| Arctonyx collaris NC020645 1           | Arctocepalus australis MG023139 1     | 0,17694008 |
| Bassariscus sumichrasti SRX1099089 1   | Arctocepalus forsteri KT693377 17     | 0,17694704 |
| Procyon lotor AB462049 4               | Nandinia binotata NC024567 1          | 0,17694855 |
| Mustela kathiah NC023210 1             | Leopardus wiedii NC028318 1           | 0,17695524 |
| Viverrilla indica NC025296 2           | Arctonyx collaris NC020645 1          | 0,17695689 |
| Monachus schauinslandi NC008421 1      | Urva javanica T413 1                  | 0,17695701 |
| Monachus schauinslandi NC008421 1      | Attilax paludinosus T606 1            | 0,17695753 |
| Viverrilla indica KX891745 1           | Canis latrans NC008093 7              | 0,17695807 |
| Zalophus wollebaeki SRR4431565 1       | Arctonyx collaris NC020645 1          | 0,1769582  |
| Phoca fasciata NC008428 1              | Galidictis fasciata DM333 1           | 0,17695867 |
| Viverrilla indica NC025296 2           | Canis latrans NC008093 7              | 0,17695971 |
| Phoca vitulina NC001325 1              | Urva semitorquata MH464789 1          | 0,1769603  |
| Phoca groenlandica NC008429 54         | Galerella sanguinea T378 1            | 0,17696525 |
| Panthera tigris amoyensis NC014770 2   | Cystophora cristata NC008427 1        | 0,17696618 |
| Viverrilla indica KX891751 1           | Ommatophoca rossii AY377287etc 1      | 0,17697993 |
| Mustela putorius NC020638 4            | Eumetopias jubatus NC004030 10        | 0,17698297 |
| Panthera leo NERO 19                   | Cystophora cristata NC008427 1        | 0,17699312 |
| Profelis aurata NC028299 1             | Ommatophoca rossii AY377287etc 1      | 0,17699319 |
| Pusa caspica NC008431 1                | Chrotogale owstoni T607 1             | 0,17700082 |
| Mustela kathiah NC023210 1             | Bassaricyon neblina SRX1097850 1      | 0,17700902 |
| Taxidea taxus NC020646 1               | Smilodon populator MF871700 1         | 0,17701292 |
| Aonyx cinerea NC035814 2               | Ailuropus fulgens styani NC009691 1   | 0,177018   |
| Mustela frenata NC020640 1             | Arctocepalus pusillus NC008417 1      | 0,17701821 |
| Phoca fasciata NC008428 1              | Urva javanica T413 1                  | 0,17702302 |
| Neovison vison NC020641 3              | Chrotogale owstoni T607 1             | 0,17702332 |
| Panthera uncia NC010638 1              | Cystophora cristata NC008427 1        | 0,1770248  |
| Taxidea taxus NC020646 1               | Catopuma temminckii NC027115 41       | 0,17702565 |
| Mustela erminea T305 2                 | Catopuma temminckii NC027115 41       | 0,17702739 |
| Paradoxurus hermaphroditus NC039591 1  | Hydrurga leptonyx NC008425 1          | 0,17702918 |
| Pusa caspica NC008431 1                | Ailuropus melanoleuca NC009492 5      | 0,17703204 |
| Galictis vittata T412 1                | Ailuropus fulgens styani NC009691 1   | 0,17703207 |
| Phoca vitulina NC001325 1              | Civettictis civetta GLC19 1           | 0,1770359  |
| Ommatophoca rossii AY377287etc 1       | Lynx canadensis NC028313 1            | 0,17704026 |
| Pusa hispida NC 008433 1               | Panthera tigris amoyensis NC014770 2  | 0,17704561 |
| Diplogale hosei MH464790 1             | Cystophora cristata NC008427 1        | 0,17704853 |
| Taxidea taxus NC020646 1               | Chrotogale owstoni T607 1             | 0,17705603 |
| Mungotictis decemlineata NC027828 1    | Halichoerus grypus NC001602 2         | 0,17707126 |
| Chrotogale owstoni T607 1              | Arctonyx collaris NC020645 1          | 0,17707229 |
| Pusa hispida NC 008433 1               | Panthera pardus NC010641 5            | 0,17707498 |
| Mustela frenata NC020640 1             | Arctocepalus townsendi NC008420 1     | 0,17707814 |
| Pusa sibirica NC008432 2               | Canis latrans NC008093 7              | 0,17708117 |
| Bassariscus sumichrasti SRX1099089 1   | Arctocepalus australis MG023139 1     | 0,17708161 |
| Neophoca cinerea NC008419 1            | Mustela frenata NC020640 1            | 0,17708246 |
| Mungotictis decemlineata NC027828 1    | Erigonathus barbatus NC008426 1       | 0,17708369 |
| Arctonyx collaris NC020645 1           | Arctocepalus forsteri NC004023 28     | 0,17708571 |
| Mustela kathiah NC023210 1             | Leopardus pardalis T262 1             | 0,17708938 |
| Prionailurus bengalensis NC028301 12   | Mustela kathiah NC023210 1            | 0,17709124 |
| Taxidea taxus NC020646 1               | Catopuma badia NC028300 1             | 0,17709266 |
| Pusa caspica NC008431 1                | Panthera uncia KP202269 1             | 0,1770933  |
| Viverrilla indica NC025296 2           | Mustela erminea T305 2                | 0,1770958  |
| Taxidea taxus NC020646 1               | Leopardus wiedii NC028318 1           | 0,17709664 |
| Proteles cristata T393 6               | Cystophora cristata NC008427 1        | 0,1770983  |
| Genetta servalina NC024568 2           | Arctodus simus NC011116 1             | 0,17709965 |
| Ursus thibetanus laniger MH281753 2    | Potos flavus T414 1                   | 0,17710163 |
| Mirounga angustirostris SRR10331586 1  | Felis margarita NC028308 1            | 0,17710301 |
| Ursus spelaeus EU327344 13             | Potos flavus T414 1                   | 0,17710334 |
| Zalophus californianus NC008416 1      | Arctotherium sp NC030174 1            | 0,17710452 |
| Phoca largha NC008430 1                | Ichneumia albicauda T603 1            | 0,17710724 |
| Phoca vitulina NC001325 1              | Caracal caracal NC028306 1            | 0,17710774 |
| Panthera onca NC022842 1               | Monachus schauinslandi NC008421 1     | 0,17711377 |
| Ursus thibetanus mupinensis NC008753 2 | Ommatophoca rossii AY377287etc 1      | 0,17711411 |
| Hemigalus derbyanus MH464791 1         | Conepatus chinga NC042596 1           | 0,17711842 |
| Homotherium latidens MF871702 3        | Arctodus simus NC011116 1             | 0,17713937 |

|                                        |                                     |            |
|----------------------------------------|-------------------------------------|------------|
| Ursus arctos GU573486 5                | Parahaena brunnea NC038159 15       | 0,1907109  |
| Ursus thibetanus mupinensis NC008753 2 | Speothos venaticus C48 2            | 0,19071105 |
| Ursus arctos AP012576 6                | Lontra canadensis SRR10409165 1     | 0,19071366 |
| Puma concolor NC016470 22              | Mephitis mephitis NC020648 1        | 0,19071409 |
| Puma yagouaroundi NC028311 1           | Odobenus rosmarus NC004029 29       | 0,19071645 |
| Ursus americanus JX196366 3            | Lycalopex sechurae KT448284 1       | 0,19071724 |
| Mephitis mephitis NC020648 1           | Lynx lynx NC027083 4                | 0,19071823 |
| Ursus arctos AP012576 6                | Felis silvestris lybica KP202275 4  | 0,19072327 |
| Lyaon pictus NC028427 2                | Ailuropus melanoleuca NC009492 5    | 0,19072402 |
| Ursus spelaeus NC011112 8              | Panthera tigris NC010642 35         | 0,19072625 |
| Ursus americanus JX196366 3            | Bassaricyon neblina SRX1097850 1    | 0,19073011 |
| Martes pennanti NC020664 16            | Diplogale hosei MH464790 1          | 0,19073038 |
| Spilogale putorius NC010497 1          | Prionailurus bengalensis NC028304 2 | 0,19073594 |
| Spilogale putorius NC010497 1          | Profelis aurata NC028299 1          | 0,19073617 |
| Spilogale putorius NC010497 1          | Canis mesomelas KT448280 1          | 0,19073817 |
| Spilogale putorius NC010497 1          | Catopuma temminckii NC027115 41     | 0,19074209 |
| Ursus maritimus NC003428 31            | Lycalopex sechurae KT448284 1       | 0,19074288 |
| Suricata suricatta SS10 1              | Meles leucurus NC039173 4           | 0,19074488 |
| Procyon lotor AB462046 3               | Mellivora capensis T370 1           | 0,19074556 |
| Eupleres goudotii D128 1               | Canis anthus NC027956 2             | 0,19074598 |
| Vulpes lagopus NC026529 3              | Melogale moschata KP272673 1        | 0,19074854 |
| Vulpes lagopus NC026529 3              | Prionodon linsang ER2391707 1       | 0,19074872 |
| Vulpes lagopus NC026529 3              | Xenogale naso C07XAR110 1           | 0,19074887 |
| Ursus arctos GU573486 5                | Lycalopex sechurae KT448284 1       | 0,19074908 |
| Vulpes lagopus NC026529 3              | Helogale parvula SRR7637809 1       | 0,1907493  |
| Vulpes ferrillata NC027935 1           | Attilax paludinosus T606 1          | 0,19074945 |
| Neophoca cinerea NC008419 1            | Helogale parvula SRR7637809 1       | 0,19075005 |
| Vulpes zerdia KJ603240 1               | Mungos mungo MMC7 1                 | 0,19075172 |
| Vulpes lagopus NC026529 3              | Mustela eversmannii NC028013 1      | 0,19075209 |
| Procyon lotor AB462049 4               | Galerella sanguinea T378 1          | 0,19075245 |
| Paradoxurus hermaphroditus NLNC 1      | Arctocepalus gazella BK010918 1     | 0,19075364 |
| Ursus littoralis catalinae KP129018    | Mustela sibirica NC020637 6         | 0,19075502 |
| Tremarctos ornatus NC009969 2          | Canis anthus NC027956 2             | 0,19075561 |
| Hyaina hyaena NC020669 1               | Canis latrans NC008093 7            | 0,19076057 |
| Ursus maritimus GU573488 Svalbard      | Bdeogale nigripes GLC15 1           | 0,19076113 |
| Procyon lotor AB462046 3               | Cryptoprocta ferox CFC13 1          | 0,19076262 |
| Parahaena brunnea NC038159 15          | Bassaricyon neblina SRX1097850 1    | 0,19076386 |
| Ursus arctos EU497665 29               | Galidia elegans D146 1              | 0,19076422 |
| Ursus maritimus NC003428 31            | Mungotictis decemlineata NC027828 1 | 0,19076423 |
| Ursus littoralis catalinae KP129018    | Pardofelis marmorata NLN3 2         | 0,19076459 |
| Urocyon cinereoargenteus NC026723 2    | Pardofelis marmorata NLN3 2         | 0,19076468 |
| Ursus maritimus GU573488 Svalbard      | Galidictis fasciata DM333 1         | 0,19076473 |
| Ursus arctos prunosus MG066703 3       | Canis latrans NC008093 7            | 0,19076616 |
| Nyctereutes procyonoides NC013700 3    | Diplogale hosei MH464790 1          | 0,19076815 |
| Helarctos malayanus NC009968 2         | Cynogale bennetti KY117544 1        | 0,19076994 |
| Panthera pardus japonensis KJ866876    | Otaria byronia OTAB 1               | 0,19077002 |
| Panthera tigris amoyensis NC014770 2   | Mustela eversmannii NC028013 1      | 0,19077027 |
| Ursus spelaeus NC011112 8              | Urva semitorquata MH464789 1        | 0,19077174 |
| Ursus thibetanus formosanus NC009333   | Nyctereutes procyonoides NC013700 3 | 0,19077374 |
| Ursus spelaeus EU327344 13             | Bdeogale nigripes GLC15 1           | 0,19077399 |
| Urva javanica T413 1                   | Helarctos malayanus NC009968 2      | 0,19077525 |
| Gulo gulo NC009685 3                   | Cynogale bennetti KY117544 1        | 0,19077782 |
| Zalophus californianus NC008416 1      | Canis anthus NC027956 2             | 0,19078161 |
| Canis lupus familiaris NC002008 1231   | Arctocepalus gazella BK010918 1     | 0,19078517 |
| Panthera pardus japonensis KJ866876    | Helarctos malayanus NC009968 2      | 0,19078523 |
| Galictis vittata T412 1                | Cryptoprocta ferox CFC13 1          | 0,19078588 |
| Lutra lutra LC050126 1                 | Cuon alpinus NC013445 3             | 0,19078636 |
| Ursus arctos AP012576 6                | Prionodon pardicolor NC024569 2     | 0,19078709 |
| Ursus americanus JX196366 3            | Canis mesomelas KT448280 1          | 0,19079259 |
| Galictis vittata T412 1                | Ailuropus melanoleuca NC009492 5    | 0,19079277 |
| Gulo gulo NC009685 3                   | Panthera leo NERO 19                | 0,19079304 |
| Vulpes ferrillata NC027935 1           | Neofelis nebulosa NC008450 3        | 0,19079612 |
| Helogale parvula SRR7637809 1          | Arctocepalus forsteri NC004023 28   | 0,19080301 |
| Martes melampus NC009678 1             | Diplogale hosei MH464790 1          | 0,19080482 |
| Ursus thibetanus laniger MH281753 2    | Odobenus rosmarus NC004029 29       | 0,19080538 |
| Zalophus californianus NC008416 1      | Panthera leo spelaeus KX258452 2    | 0,19081034 |
| Spilogale putorius NC010497 1          | Arctocepalus pusillus NC008417 1    | 0,19081302 |
| Salanoia concolor D378 1               | Conepatus chinga NC042596 1         | 0,19081596 |
| Vulpes ferrillata NC027935 1           | Martes zibellina NC011579 39        | 0,19081606 |
| Ursus arctos AP012576 6                | Diplogale hosei MH464790 1          | 0,19081636 |
| Nasua nasua NC020647 1                 | Crossarchus paltacephalus C7R66 1   | 0,19081666 |
| Ursus arctos GU573486 5                | Panthera pardus NC010641 5          | 0,1908185  |
| Ursus thibetanus laniger MH281753 2    | Cuon alpinus NC013445 3             | 0,19081891 |
| Poecilogale albinucha T602 1           | Cynogale bennetti KY117544 1        | 0,19082209 |
| Otocyon megalotis SAF1 2               | Helogale parvula SRR7637809 1       | 0,19082509 |
| Poecilogale albinucha T602 1           | Eupleres goudotii D128 1            | 0,19082586 |
| Poecilogale albinucha T602 1           | Xenogale naso C07XAR110 1           | 0,19082655 |
| Otocyon megalotis SAF1 2               | Lontra canadensis SRR10409165 1     | 0,1908278  |
| Panthera uncia NC010638 1              | Mustela itatsi NC034330 19          | 0,19082817 |
| Ursus arctos GU573491 207              | Mungos mungo MMC7 1                 | 0,1908282  |
| Ursus maritimus GU573488 Svalbard      | Xenogale naso C07XAR110 1           | 0,19082826 |
| Speothos venaticus C48 2               | Crossarchus paltacephalus C7R66 1   | 0,19082868 |
| Otocolobus manul NC028323 1            | Lontra canadensis SRR10409165 1     | 0,19083242 |
| Urocyon cinereoargenteus NC026723 2    | Caracal caracal NC028306 1          | 0,19083321 |
| Ursus arctos EU497665 29               | Canis anthus NC027956 2             | 0,19083354 |
| Arctocepalus australis MG023139 1      | Arctictis binturong T605 2          | 0,19083652 |
| Ursus thibetanus formosanus NC009333   | Urva semitorquata MH464789 1        | 0,19083755 |
| Panthera tigris amoyensis NC014770 2   | Mustela sibirica NC020637 6         | 0,19083779 |
| Ursus maritimus GU573488 Svalbard      | Paradoxurus hermaphroditus NLNC 1   | 0,1908378  |
| Potos flavus T414 1                    | Crocota crocata NC020670 3          | 0,19083816 |
| Otaria byronia OTAB 1                  | Lyaon pictus NC028427 2             | 0,19083883 |
| Vulpes vulpes NC008434 5               | Ursus spelaeus NC011112 8           | 0,19083937 |
| Zalophus wollebaeki SRR4431565 1       | Lycalopex sechurae KT448284 1       | 0,19084047 |
| Tremarctos ornatus NC009969 2          | Panthera onca NC022842 1            | 0,19084144 |
| Ursus arctos EU497665 29               | Felis nigripes NC028309 1           | 0,19084196 |
| Vulpes corsac NC023958 1               | Mephitis mephitis NC020648 1        | 0,19084206 |
| Panthera uncia NC010638 1              | Lyaon pictus NC028427 2             | 0,19084264 |
| Panthera tigris NC010642 35            | Arctodus simus NC011116 1           | 0,19084628 |
| Lutrogale perspicillata NC035811 2     | Acinonyx jubatus NC005212 3         | 0,19085433 |
| Zalophus californianus NC008416 1      | Galidia elegans D146 1              | 0,19085588 |
| Ursus arctos AP012576 6                | Felis catus NC001700 2              | 0,19085763 |
| Urocyon cinereoargenteus NC026723 2    | Civettictis civetta NC033378 1      | 0,19086961 |
| Otocyon megalotis SAF1 2               | Urva javanica/aruopunctata NC006835 | 0,19087128 |

|                                        |                                       |            |
|----------------------------------------|---------------------------------------|------------|
| Nasua nasua NC020647 1                 | Martes americana NC020642 1           | 0,17714566 |
| Bassariscus sumichrasti SRX1099089 1   | Arctocepalus gazella BK010918 1       | 0,17714976 |
| Pusa caspica NC008431 1                | Mungos mungo MMC7 1                   | 0,17714979 |
| Lynx lynx NC027083 4                   | Lutra lutra LC050126 1                | 0,17715535 |
| Viverricula indica NC025296 2          | Mustela frenata NC020640 1            | 0,17715679 |
| Mirounga angustirostris SRR10331586 1  | Attilax paludinosus TG06 1            | 0,17715976 |
| Zalophus wollebaeki SRR4431565 1       | Nandinia binotata NC024567 1          | 0,1771604  |
| Taxidea taxus NC020646 1               | Puma concolor NC016470 22             | 0,17716135 |
| Pusa sibirica NC008432 2               | Profelis aurata NC028299 1            | 0,17716224 |
| Pusa caspica NC008431 1                | Caracal caracal NC028306 1            | 0,17716232 |
| Pusa caspica NC008431 1                | Hyaena hyaena NC020669 1              | 0,1771632  |
| Mirounga angustirostris SRR10331586 1  | Felis catus NC001700 2                | 0,1771695  |
| Phoca largha NC008430 1                | Caracal caracal NC028306 1            | 0,17717522 |
| Panthera leo spelaea KX258452 2        | Lobodon carcinophaga NC008423 1       | 0,17718355 |
| Martes flavigula NC012141 3            | Callorhinus ursinus NC008415 1        | 0,17718591 |
| Galerella sanguinea T378 1             | Canis adustus KT448271 1              | 0,17718939 |
| Monachus schauinslandi NC008421 1      | Canis lupus familiaris NC002008 1231  | 0,1771915  |
| Spilogale putorius NC010497 1          | Phoca groenlandica NC008429 54        | 0,17720063 |
| Cystophora cristata NC008427 1         | Conepatus chinga NC042596 1           | 0,17720565 |
| Melogale moschata V0735A 1             | Bassaricyon neblina SRX1097850 1      | 0,17721134 |
| Pardofelis marmorata NLN3 2            | Halichoerus grypus NC001602 2         | 0,17721179 |
| Mephitis mephitis NC020648 1           | Halichoerus grypus NC001602 2         | 0,17721334 |
| Martes martes T302 3                   | Callorhinus ursinus NC008415 1        | 0,17721617 |
| Meles meles T303 3                     | Lynx lynx NC027083 4                  | 0,17722057 |
| Viverricula indica KX891751 1          | Arctonyx collaris NC020645 1          | 0,17722385 |
| Leptailurus serval NC028316 1          | Arctonyx collaris NC020645 1          | 0,17722388 |
| Prionailurus rubiginosus NC028304 2    | Mustela kathiah NC023210 1            | 0,17722577 |
| Viverricula indica KX891751 1          | Canis latrans NC008093 7              | 0,17722781 |
| Neophoca cinerea NC008419 1            | Arctodus simus NC011116 1             | 0,17722784 |
| Mustela erminea T305 2                 | Leptailurus serval NC028316 1         | 0,17722884 |
| Phoca largha NC008430 1                | Attilax paludinosus TG06 1            | 0,17722926 |
| Phoca vitulina NC001325 1              | Attilax paludinosus TG06 1            | 0,17722933 |
| Vulpes lagopus NC026529 3              | Lobodon carcinophaga NC008423 1       | 0,17723018 |
| Pusa sibirica NC008432 2               | Galictis vittata T412 1               | 0,17723756 |
| Viverricula indica KX891745 1          | Bassariscus sumichrasti SRX1099089 1  | 0,17723772 |
| Martes foina NC020643 1                | Arctodus simus NC011116 1             | 0,17723949 |
| Pusa hispida NC008433 1                | Panthera uncia NC010638 1             | 0,17723958 |
| Mephitis mephitis NC020648 1           | Meles anakuma NC009677 1              | 0,17724103 |
| Ursus thibetanus thibetanus NC011118 4 | Meles leucurus NC039173 4             | 0,17724161 |
| Ictonyx striatus T299 1                | Homotherium latidens MF871702 3       | 0,17725773 |
| Pardofelis marmorata NLN3 2            | Monachus monachus NC044972 5          | 0,177259   |
| Pusa sibirica NC008432 2               | Panthera leo NERO 19                  | 0,17726016 |
| Pusa caspica NC008431 1                | Panthera leo NERO 19                  | 0,17726067 |
| Salanoia concolor D378 1               | Monachus monachus NC044972 5          | 0,17726296 |
| Viverricula indica NC025296 2          | Canis lupus chanco NC010340 4         | 0,17726666 |
| Zalophus californianus NC008416 1      | Helarctos malayanus NC009968 2        | 0,17726848 |
| Spilogale putorius NC010497 1          | Canis adustus KT448271 1              | 0,17727056 |
| Mirounga leonina NC008422 1            | Canis anthus NC027956 2               | 0,17728481 |
| Lutra lutra LC050126 1                 | Arctotherium sp NC030174 1            | 0,17728807 |
| Viverricula indica KX891751 1          | Canis aureus KT448274 1               | 0,17729186 |
| Mustela nigripes NC024942 1            | Leopardus pardalis NC028315 1         | 0,17729314 |
| Ursus thibetanus mupinensis NC008753 2 | Potos flavus T414 1                   | 0,17729382 |
| Phoca groenlandica NC008429 54         | Cryptoprocta ferox CFC13 1            | 0,17729446 |
| Prionailurus planiceps KY682741 4      | Mustela erminea T305 2                | 0,17729515 |
| Prionailurus bengalensis CKM45 20      | Mustela frenata NC020640 1            | 0,17729576 |
| Hyaena hyaena NC020669 1               | Erigonathus barbatus NC008426 1       | 0,17729643 |
| Pusa sibirica NC008432 2               | Crocota crocata NC020670 3            | 0,17730081 |
| Pusa sibirica NC008432 2               | Panthera onca NC022842 1              | 0,17730637 |
| Phoca fasciata NC008428 1              | Diplogale hosei MH464790 1            | 0,17730789 |
| Profelis aurata NC028299 1             | Phoca largha NC008430 1               | 0,17730969 |
| Ursus spelaeus NC011112 8              | Meles meles T303 3                    | 0,17730969 |
| Phoca vitulina NC001325 1              | Parahyaena brunnea NC038159 15        | 0,17731363 |
| Neovison vison NC020641 3              | Arctictis binturong TG05 2            | 0,17731817 |
| Paradoxurus jerdoni MH464793 1         | Monachus monachus NC044972 5          | 0,17732072 |
| Viverricula indica NC025296 2          | Canis lupus familiaris NC002008 1231  | 0,17732462 |
| Procyon lotor AB462046 3               | Ommatophoca rossii AY377287etc 1      | 0,1773337  |
| Mustela putorius NC020638 4            | Hemigale derbyanus MH464791 1         | 0,17733532 |
| Pusa sibirica NC008432 2               | Conepatus chinga NC042596 1           | 0,17733859 |
| Canis adustus KT448271 1               | Arctodus simus NC011116 1             | 0,17733879 |
| Mustela frenata NC020640 1             | Chrotogale owstoni TG07 1             | 0,17734009 |
| Profelis aurata NC028299 1             | Halichoerus grypus NC001602 2         | 0,17734419 |
| Ommatophoca rossii AY377287etc 1       | Melogale moschata NC020644 1          | 0,17734675 |
| Meles leucurus NC039173 4              | Genetta abyssinica MG489822 1         | 0,17735232 |
| Viverricula indica KX891745 1          | Arctonyx collaris NC020645 1          | 0,17735814 |
| Phoca groenlandica NC008429 54         | Bassaricyon neblina SRX1097850 1      | 0,17735918 |
| Mustela frenata NC020640 1             | Leopardus jacobita NC028322 1         | 0,17735952 |
| Ursus arctos isabellinus 1885 2        | Potos flavus T414 1                   | 0,17735954 |
| Phoca fasciata NC008428 1              | Cynictis penicillata T375 1           | 0,17735963 |
| Mustela frenata NC020640 1             | Arctotherium sp NC030174 1            | 0,17735991 |
| Martes americana NC020642 1            | Lynx pardinus NC028319 161            | 0,17736204 |
| Suricata suricatta SSM10 1             | Mirounga angustirostris SRR10331586 1 | 0,17736258 |
| Prionailurus planiceps KY682741 4      | Ommatophoca rossii AY377287etc 1      | 0,17736261 |
| Taxidea taxus NC020646 1               | Prionailurus viverrinus NC028305 1    | 0,17736481 |
| Viverra tangalunga MH464792 1          | Arctodus simus NC011116 1             | 0,17736585 |
| Taxidea taxus NC020646 1               | Prionailurus bengalensis CKM45 20     | 0,17736596 |
| Viverricula indica KX891751 1          | Arctodus simus NC011116 1             | 0,17736806 |
| Panthera onca NC022842 1               | Mirounga leonina NC008422 1           | 0,17736948 |
| Ursus thibetanus laniger MH281753 2    | Nandinia binotata NC024567 1          | 0,17737241 |
| Panthera uncia NC010638 1              | Hydrurga leptonyx NC008425 1          | 0,17737243 |
| Mustela frenata NC020640 1             | Acinonyx jubatus NC005212 3           | 0,17737408 |
| Phoca groenlandica NC008429 54         | Galictis vittata T412 1               | 0,17738006 |
| Phoca fasciata NC008428 1              | Galictis vittata T412 1               | 0,17738022 |
| Lutra lutra NC011358 9                 | Eumetopias jubatus NC004030 10        | 0,17738205 |
| Mustela sibirica AP017394 11           | Eumetopias jubatus NC004030 10        | 0,17738748 |
| Mustela itatsi NC034330 19             | Eumetopias jubatus NC004030 10        | 0,17738764 |
| Halichoerus grypus NC001602 2          | Cynictis penicillata T375 1           | 0,17739649 |
| Panthera pardus NC010641 5             | Erigonathus barbatus NC008426 1       | 0,17739831 |
| Ommatophoca rossii AY377287etc 1       | Catopuma badia NC028300 1             | 0,17739856 |
| Meles anakuma NC009677 1               | Hemigale derbyanus MH464791 1         | 0,17740107 |
| Ichneumia albicauda TG03 1             | Halichoerus grypus NC001602 2         | 0,1774102  |
| Nasua nasua NC020647 1                 | Mustela frenata NC020640 1            | 0,17741215 |
| Pusa sibirica NC008432 2               | Chrotogale owstoni TG07 1             | 0,17741284 |
| Martes melampus NC009678 1             | Arctocepalus pusillus NC008417 1      | 0,17741299 |

|                                       |                                      |            |
|---------------------------------------|--------------------------------------|------------|
| Eumetopias jubatus NC004030 10        | Canis mesomelas KT448280 1           | 0,19087279 |
| Neofelis nebulosa NC008450 3          | Mustela altaica NC021751 1           | 0,19087307 |
| Panthera pardus NC010641 5            | Otaria byronia OTAB 3                | 0,19087677 |
| Proteles cristata T393 6              | Gulo gulo NC009685 3                 | 0,19088081 |
| Galidictis fasciata DM333 1           | Conepatus chinga NC042596 1          | 0,19088209 |
| Ursus thibetanus formosanus NC00933   | Canis lupus familiaris NC002008 1231 | 0,1908828  |
| Zalophus californianus NC008416 1     | Canis lupus familiaris NC002008 1231 | 0,19088362 |
| Canis latrans NC008093 7              | Arctocepalus gazella BK010918 1      | 0,19088475 |
| Bdeogale nigripes GLC15 1             | Bassaricyon neblina SRX1097850 1     | 0,19088535 |
| Zalophus wollebaeki SRR4431565 1      | Panthera pardus NC010641 5           | 0,19088545 |
| Lutrogale perspicillata NC035811 1    | Xenogale naso C07XAR110 1            | 0,19088624 |
| Canis latrans NC008093 7              | Aonyx cinerea NC035814 2             | 0,19088694 |
| Procyon lotor AB462049 4              | Bdeogale nigripes GLC15 1            | 0,19088748 |
| Vulpes vulpes NC008434 5              | Arctonyx collaris NC020645 1         | 0,19088785 |
| Vulpes lagopus NC026529 3             | Viverra tangalunga MH464792 1        | 0,19088797 |
| Viverra tangalunga MH464792 1         | Galidia elegans D146 1               | 0,19088806 |
| Procyon lotor AB462049 4              | Urva brachyura KY117547 1            | 0,19088855 |
| Meles anakuma NC009677 1              | Cryptoprocta ferox CFC13 1           | 0,19089343 |
| Panthera uncia NC010638 1             | Martes americana NC020642 1          | 0,19089711 |
| Tremarctos ornatus NC009969 2         | Panthera uncia KP202269 1            | 0,19089799 |
| Panthera pardus japonensis KJ866876   | Lontra canadensis SRR10409165 1      | 0,19089894 |
| Urocyon littoralis catalinae KP129018 | Felis catus NC001700 2               | 0,19089913 |
| Parahyaena brunnea NC038159 15        | Canis anthus NC027956 2              | 0,19090134 |
| Mustela sibirica NC020637 6           | Crocota crocata NC020670 3           | 0,19090137 |
| Mustela itatsi NC034330 19            | Crocota crocata NC020670 3           | 0,19090275 |
| Ursus maritimus NC003428 31           | Paradoxurus hermaphroditus NLNC 1    | 0,19090509 |
| Panthera tigris NC010642 35           | Mustela evermannii NC028013 1        | 0,19090511 |
| Ursus arctos isabellinus 1885 2       | Paradoxurus hermaphroditus NC03959   | 0,1909052  |
| Ursus arctos AP012576 6               | Canis mesomelas KT448280 1           | 0,19090603 |
| Vulpes vulpes NC008434 5              | Ursus thibetanus laniger MH281753 2  | 0,1909067  |
| Urva brachyura KY117547 1             | Galictis vittata T412 1              | 0,19090694 |
| Leptailurus serval NC028316 1         | Bassaricyon neblina SRX1097850 1     | 0,19090737 |
| Ursus thibetanus laniger MH281753 2   | Suricata suricatta SSM10 1           | 0,19090776 |
| Speothos venaticus C48 2              | Paguma larvata PDS11 2               | 0,19090864 |
| Ursus maritimus NC003428 31           | Pardofelis marmorata NLN3 2          | 0,1909087  |
| Ursus arctos EU497665 29              | Otocolobus manul NC028323 1          | 0,19091068 |
| Zalophus californianus NC008416 1     | Tapirus terrestris T358              | 0,19091091 |
| Zalophus wollebaeki SRR4431565 1      | Lycaon pictus NC028427 2             | 0,19091256 |
| Zalophus wollebaeki SRR4431565 1      | Panthera pardus japonensis KJ866876  | 0,19091307 |
| Panthera pardus japonensis KJ866876   | Ailuropoda melanoleuca NC009492 5    | 0,19091344 |
| Genetta genetta T297 1                | Galictis vittata T412 1              | 0,19091986 |
| Ursus arctos AP012576 6               | Panthera onca KP202269 1             | 0,19091998 |
| Mephitis mephitis NC020648 1          | Leopardus geoffroyi NC028320 1       | 0,19092196 |
| Vulpes corsac NC023958 1              | Ursus americanus JX196366 3          | 0,19093093 |
| Vulpes ferrillata NC027935 1          | Gulo gulo NC009685 3                 | 0,1909312  |
| Melogale moschata V0735A 1            | Canis alpinus NC013445 3             | 0,19093211 |
| Spilogale putorius NC010497 1         | Felis silvestris lybica KP202275 4   | 0,19093661 |
| Ursus arctos pruinosus MG066703 3     | Panthera leo NERO 19                 | 0,19094324 |
| Urocyon cinereoargenteus NC026723 2   | Genetta abyssinica MG489822 1        | 0,19094864 |
| Panthera pardus NC010641 5            | Ailuropoda melanoleuca NC009492 5    | 0,1909506  |
| Vulpes ferrillata NC027935 1          | Meles meles T303 3                   | 0,19095188 |
| Vulpes corsac NC023958 1              | Lutra sumatrana NC035810 1           | 0,19095273 |
| Vulpes zerdia KJ603240 1              | Mungos mungo/gambianus SRR77048      | 0,19095312 |
| Mungotictis decemlineata NC027828     | Lycalopex sechurae KT448284 1        | 0,19095315 |
| Panthera leo NERO 19                  | Galictis vittata T412 1              | 0,19095446 |
| Vulpes lagopus NC026529 3             | Arctonyx collaris NC020645 1         | 0,19095597 |
| Urocyon cinereoargenteus NC026723 2   | Mustela frenata NC020640 1           | 0,19095656 |
| Panthera uncia KP202269 1             | Tapirus terrestris T358              | 0,1909577  |
| Melogale moschata V0735A 1            | Galerella sanguinea T378 1           | 0,19095795 |
| Viverricula indica KX891751 1         | Lontra canadensis SRR10409165 1      | 0,19095883 |
| Poecilogale albinucha TG02 1          | Bdeogale nigripes GLC15 1            | 0,19096078 |
| Vulpes zerdia KJ603240 1              | Paradoxurus jerdoni MH464793 1       | 0,19096097 |
| Neophoca cinerea NC008419 1           | Diplogale hosei MH464790 1           | 0,19096133 |
| Vulpes zerdia KJ603240 1              | Ursus thibetanus mupinensis NC00875  | 0,19096234 |
| Vulpes zerdia KJ603240 1              | Hyaena hyaena NC020669 1             | 0,19096254 |
| Ursus maritimus GU573488 Svalbard     | Mungotictis decemlineata NC027828 1  | 0,19096631 |
| Hyaena hyaena NC020669 1              | Bassaricyon neblina SRX1097850 1     | 0,19096634 |
| Ursus arctos isabellinus 1885 2       | Mungotictis decemlineata NC027828 1  | 0,19096664 |
| Ursus arctos EU497665 29              | Galidictis fasciata DM333 1          | 0,19096671 |
| Proteles cristata T393 6              | Melogale moschata V0735A 1           | 0,19096708 |
| Ursus arctos isabellinus 1885 2       | Galidictis fasciata DM333 1          | 0,19096714 |
| Poecilogale albinucha TG02 1          | Lycalopex sechurae KT448284 1        | 0,19096813 |
| Felis silvestris lybica KP202275 4    | Bassaricyon neblina SRX1097850 1     | 0,19097054 |
| Genetta abyssinica MG489822 1         | Bassaricyon neblina SRX1097850 1     | 0,19097155 |
| Mephitis mephitis NC020648 1          | Xenogale naso C07XAR110 1            | 0,19097205 |
| Poecilogale albinucha TG02 1          | Panthera uncia KP202269 1            | 0,19097251 |
| Panthera tigris NC010642 35           | Mustela sibirica NC020637 6          | 0,19097252 |
| Odobenus rosmarus NC004029 29         | Fossa fossana D350 1                 | 0,19097281 |
| Ursus maritimus NC003428 31           | Otocyon megalotis SAF1 2             | 0,19097306 |
| Eupleres goudoti D128 1               | Chrysocyon brachyurus NC024172 1     | 0,19097355 |
| Panthera pardus NC010641 5            | Canis mesomelas KT448280 1           | 0,19097376 |
| Mephitis mephitis NC020648 1          | Cynictis penicillata T375 1          | 0,19097398 |
| Panthera leo spelaea KX258452 2       | Tapirus terrestris T358              | 0,19097431 |
| Ursus arctos GU573491 207             | Galerella sanguinea T378 1           | 0,19097458 |
| Ursus maritimus GU573488 Svalbard     | Galerella sanguinea T378 1           | 0,19097462 |
| Ursus arctos EU497665 29              | Panthera uncia NC010638 1            | 0,19097561 |
| Ursus spelaeus EU327344 13            | Xenogale naso C07XAR110 1            | 0,1909759  |
| Ursus thibetanus laniger MH281753 2   | Nyctereutes pronyonides NC013700 3   | 0,19097711 |
| Ursus arctos pruinosus MG066703 3     | Paradoxurus hermaphroditus NLNC 1    | 0,19097905 |
| Ursus maritimus GU573488 Svalbard     | Lycaon pictus NC028427 2             | 0,19097994 |
| Canis mesomelas KT448280 1            | Arctocepalus gazella BK010918 1      | 0,1909824  |
| Mephitis mephitis NC020648 1          | Felis margarita NC028308 1           | 0,19098304 |
| Urva javanica/auropunctata NC006839   | Bassaricyon neblina SRX1097850 1     | 0,19098543 |
| Ursus arctos AP012576 6               | Panthera pardus japonensis KJ866876  | 0,19098777 |
| Parahyaena brunnea NC038159 15        | Helarctos malayanus NC009968 2       | 0,19099148 |
| Ursus spelaeus EU327344 13            | Panthera tigris NC010642 35          | 0,19099237 |
| Ursus arctos AP012576 6               | Leopardus tigrinus NC028317 1        | 0,19099337 |
| Panthera tigris amoyensis NC014770 2  | Lycalopex sechurae KT448284 1        | 0,1909935  |
| Cynogale bennetti KY117544 1          | Canis alpinus NC013445 3             | 0,19099382 |
| Ursus thibetanus formosanus NC00933   | Panthera onca KP202269 1             | 0,19099638 |
| Procyon lotor AB462049 4              | Canis alpinus NC013445 3             | 0,1910089  |
| Ursus americanus JX196366 3           | Panthera uncia KP202269 1            | 0,19101056 |
| Ursus thibetanus mupinensis NC00875   | Canis alpinus NC013445 3             | 0,19101056 |

|                                       |                                       |            |
|---------------------------------------|---------------------------------------|------------|
| Tremarctos ornatus NC009969 2         | Potos flavus T414 1                   | 0,17741309 |
| Callorhinus ursinus NC008415 1        | Arctodus simus NC011116 1             | 0,17742248 |
| Lynx canadensis NC028313 1            | Enhydra lutris NC009692 1             | 0,17742497 |
| Paradoxurus hermaphroditus NLNC 1     | Leptonychotes weddellii NC008424 1    | 0,17742634 |
| Mustela frenata NC020640 1            | Caracal caracal NC028306 1            | 0,17742655 |
| Phoca fasciata NC008428 1             | Canis latrans NC008093 7              | 0,17742708 |
| Pusa hispida NC 008433 1              | Atilax paludinosus T606 1             | 0,1774275  |
| Mustela frenata NC020640 1            | Arctocepalus forsteri NC004023 28     | 0,17742763 |
| Viverricula indica KX891745 1         | Canis anthus NC027956 2               | 0,17742915 |
| Catopuma badia NC028300 1             | Canis aureus KT448274 1               | 0,17742947 |
| Paradoxurus hermaphroditus NLNC 1     | Hydrurga leptonyx NC008425 1          | 0,17743319 |
| Phoca vitulina NC001325 1             | Galidictis fasciata DM333 1           | 0,17743589 |
| Galictis vittata T412 1               | Ailurus fulgens NC011124 1            | 0,17743601 |
| Phoca groenlandica NC008429 54        | Leopardus guigna NC028321 1           | 0,17744127 |
| Phoca largha NC008430 1               | Panthera onca KP202264 2              | 0,17744324 |
| Pusa caspica NC008431 1               | Canis lupus familiaris NC002008 1231  | 0,17744961 |
| Monachus monachus NC0044972 5         | Galerella sanguinea T378 1            | 0,17744646 |
| Mustela erminea T305 2                | Canis adustus KT448271 1              | 0,17746758 |
| Spilogale putorius NC0010497 1        | Ailurus fulgens styani NC009691 1     | 0,17746814 |
| Gulo gulo NC009685 3                  | Eumetopias jubatus NC004030 10        | 0,17747135 |
| Genetta genetta T297 1                | Canis adustus KT448271 1              | 0,17747244 |
| Fossa fossana D350 1                  | Arctonyx collaris NC020645 1          | 0,17748076 |
| Lutra sumatrana NC035810 1            | Arctocepalus gazella BK010918 1       | 0,17748104 |
| Mirounga leonina NC008422 1           | Helogale parvula SRR7637809 1         | 0,17748451 |
| Pusa caspica NC008431 1               | Atilax paludinosus T606 1             | 0,17748451 |
| Pusa sibirica NC008432 2              | Atilax paludinosus T606 1             | 0,17748451 |
| Taxidea taxus NC020646 1              | Crossarchus platycephalus C7R66 1     | 0,17749177 |
| Mirounga leonina NC008422 1           | Felis catus NC001700 2                | 0,17749274 |
| Viverra zibetha T609 1                | Potos flavus T414 1                   | 0,17749299 |
| Mustela erminea T305 2                | Catopuma badia NC028300 1             | 0,17749861 |
| Pusa caspica NC008431 1               | Profelis aurata NC028299 1            | 0,17749882 |
| Martes americana NC020642 1           | Arctodus simus NC011116 1             | 0,17749907 |
| Mustela eversmanni NC028013 1         | Arctodus simus NC011116 1             | 0,17749964 |
| Mustela itatsi NC034330 19            | Arctodus simus NC011116 1             | 0,17750058 |
| Martes martes T302 3                  | Arctodus simus NC011116 1             | 0,17750315 |
| Procyon lotor AB462049 4              | Galictis vittata T412 1               | 0,17750686 |
| Otocyon megalotis SAF1 2              | Lobodon carcinophaga NC008423 1       | 0,17750844 |
| Martes foina NC020643 1               | Lynx lynx NC027083 4                  | 0,17750938 |
| Phoca vitulina NC001325 1             | Panthera onca KP202264 2              | 0,17751038 |
| Caracal caracal NC028306 1            | Canis adustus KT448271 1              | 0,17751156 |
| Potos flavus T414 1                   | Mephitis mephitis NC020648 1          | 0,17751206 |
| Phoca fasciata NC008428 1             | Panthera onca NC022842 1              | 0,17751473 |
| Ommatophoca rossii AY377287etc 1      | Ictonyx striatus T299 1               | 0,17752358 |
| Nasua nasua NC020647 1                | Martes flavigula NC012141 3           | 0,17752893 |
| Eumetopias jubatus NC004030 10        | Arctotherium sp NC030174 1            | 0,17753237 |
| Ursus americanus JX196366 3           | Meles meles T303 3                    | 0,17753379 |
| Smilodon populator MF871702 3         | Arctodus simus NC011116 1             | 0,17753659 |
| Mustela putorius NC020638 4           | Callorhinus ursinus NC008415 1        | 0,17754592 |
| Erigathus barbatus NC008426 1         | Canis aureus KT448274 1               | 0,17754902 |
| Taxidea taxus NC020646 1              | Phocartos hookeri NC008418 1          | 0,17755711 |
| Otaria byronia OTAB 1                 | Arctonyx collaris NC020645 1          | 0,17755838 |
| Prionailurus bengalensis NC028301 12  | Meles leucurus NC039173 4             | 0,17755975 |
| Paradoxurus jerdoni MH464793 1        | Arctonyx collaris NC020645 1          | 0,17756039 |
| Paguma larvata PDD511 2               | Arctonyx collaris NC020645 1          | 0,17756043 |
| Pusa hispida NC 008433 1              | Urva brachyura KY117547 1             | 0,17756052 |
| Mirounga leonina NC008422 1           | Galerella sanguinea T378 1            | 0,17756219 |
| Panthera uncia NC010638 1             | Erigathus barbatus NC008426 1         | 0,17756228 |
| Phoca fasciata NC008428 1             | Paradoxurus hermaphroditus NLNC 1     | 0,1775638  |
| Pusa caspica NC008431 1               | Panthera onca KP202264 2              | 0,17756459 |
| Pusa sibirica NC008432 2              | Panthera pardus japonensis KJ866876 8 | 0,17756467 |
| Pusa sibirica NC008432 2              | Panthera uncia KP202269 1             | 0,17756468 |
| Mirounga angustirostris SRR10331586 1 | Cynictis penicillata T375 1           | 0,1775651  |
| Phoca vitulina NC001325 1             | Cynictis penicillata T375 1           | 0,17756544 |
| Homotherium latidens MF871702 3       | Arctonyx collaris NC020645 1          | 0,17757209 |
| Viverricula indica NC025296 2         | Arctodus simus NC011116 1             | 0,17757276 |
| Puma concolor NC016470 22             | Neovison vison NC020641 3             | 0,17757435 |
| Profelis aurata NC028299 1            | Phoca vitulina NC001325 1             | 0,17757891 |
| Meles meles T303 3                    | Eumetopias jubatus NC004030 10        | 0,17758608 |
| Mustela nigripes NC024942 1           | Eumetopias jubatus NC004030 10        | 0,17758903 |
| Mirounga angustirostris SRR10331586 1 | Canis lupus familiaris NC002008 1231  | 0,17759906 |
| Mungos mungo MMC7 1                   | Halichoerus grypus NC001602 2         | 0,17760089 |
| Lutra lutra LC050126 1                | Fossa fossana D350 1                  | 0,17761245 |
| Halichoerus grypus NC001602 2         | Genetta genetta T297 1                | 0,17761341 |
| Meles meles T303 3                    | Fossa fossana D350 1                  | 0,17761464 |
| Panthera onca KP202264 2              | Halichoerus grypus NC001602 2         | 0,17761664 |
| Prionodon linsang ERR2391707 1        | Erigathus barbatus NC008426 1         | 0,17761917 |
| Pusa caspica NC008431 1               | Bdeogale nigripes GLC15 1             | 0,17761917 |
| Mungos mungo MMC7 1                   | Canis adustus KT448271 1              | 0,17761926 |
| Meles leucurus NC039173 4             | Arctocepalus pusillus NC008417 1      | 0,17761987 |
| Vulpes zerda KJ603240 1               | Leptonychotes weddellii NC008424 1    | 0,17762204 |
| Taxidea taxus NC020646 1              | Arctocepalus townsendi NC008420 1     | 0,17762284 |
| Meles leucurus NC039173 4             | Lynx lynx NC027083 4                  | 0,17762417 |
| Mustela frenata NC020640 1            | Lynx pardinus NC028319 161            | 0,17762886 |
| Panthera pardus japonensis KJ866876 8 | Erigathus barbatus NC008426 1         | 0,17762956 |
| Lyaon pictus NC028427 2               | Erigathus barbatus NC008426 1         | 0,17763147 |
| Melogale moschata KP726273 1          | Leopardus wiedii NC028318 1           | 0,17763186 |
| Meles meles T303 3                    | Homotherium latidens MF871702 3       | 0,17763215 |
| Potos flavus T414 1                   | Leopardus pardalis NC028315 1         | 0,17763266 |
| Mustela kathiah NC023210 1            | Arctodus simus NC011116 1             | 0,17763434 |
| Nyctereutes procyonoides NC013700 3   | Monachus schauinslandi NC008421 1     | 0,17763464 |
| Neovison vison NC020641 3             | Leopardus pardalis T262 1             | 0,17764041 |
| Nandinia binotata NC024567 1          | Helarctos malayanus NC009968 2        | 0,17764285 |
| Martes foina NC020643 1               | Leopardus pardalis NC028315 1         | 0,17764588 |
| Phoca vitulina NC001325 1             | Ichneumia albicauda T603 1            | 0,17764597 |
| Martes foina NC020643 1               | Leopardus pardalis T262 1             | 0,17764607 |
| Mustela nigripes NC024942 1           | Homotherium latidens MF871702 3       | 0,17764615 |
| Phoca vitulina NC001325 1             | Hyaina hyaena NC020669 1              | 0,1776485  |
| Hydrurga leptonyx NC008425 1          | Crocota crocata NC020670 3            | 0,17765327 |
| Monachus monachus NC0044972 5         | Canis latrans NC008093 7              | 0,17765622 |
| Viverricula indica KX891751 1         | Canis lupus familiaris NC002008 1231  | 0,17766022 |
| Nasua nasua NC020647 1                | Gulo gulo NC009685 3                  | 0,17766142 |
| Profelis aurata NC028299 1            | Canis adustus KT448271 1              | 0,17767747 |
| Catopuma badia NC028300 1             | Canis lupus chanco NC010340 4         | 0,17767859 |

|                                       |                                      |            |
|---------------------------------------|--------------------------------------|------------|
| Ursus thibetanus mupinensis NC00875   | Urva javanica/auropunctata NC006835  | 0,19101286 |
| Cryptoprocta ferox CFC13 1            | Arctocepalus forsteri NC004023 28    | 0,19101314 |
| Vulpes lagopus NC026529 3             | Lutra lutra NC01358 9                | 0,19101416 |
| Melogale moschata V0735A 1            | Urva brachyura KY117547 1            | 0,19101562 |
| Canis latrans NC008093 7              | Arctocepalus forsteri KT693377 17    | 0,19101815 |
| Phoca fasciata NC008428 1             | Diplogale hosei MH464790 1           | 0,19101924 |
| Urocyon littoralis catalinae KP129018 | Enhydra lutris NC009692 1            | 0,19101937 |
| Martes flavigula NC012141 3           | Crocota crocata NC020670 3           | 0,19102019 |
| Ursus spelaeus EU327344 13            | Panthera leo NERO 19                 | 0,19102077 |
| Vulpes zerda KJ603240 1               | Galidia elegans D146 1               | 0,19102164 |
| Ursus thibetanus formosanus NC0093    | Urva javanica/auropunctata NC006835  | 0,19102259 |
| Ursus thibetanus laniger MH281753 2   | Panthera leo NERO 19                 | 0,19102263 |
| Urocyon cinereoargenteus NC026723 2   | Mustela itatsi NC034330 19           | 0,19102493 |
| Urocyon cinereoargenteus NC026723 2   | Mustela erminea T305 2               | 0,19102542 |
| Otocyon megalotis SAF1 2              | Urva semitorquata MH464789 1         | 0,19102772 |
| Galerella sanguinea T378 1            | Bassaricyon neblina SRX1097850 1     | 0,19102795 |
| Ursus arctos EU497665 29              | Mungos mungo/gambianus SRR77048      | 0,19103049 |
| Melurus ursinus NC009970 2            | Lycalopex securus KT448284 1         | 0,19103281 |
| Mustela altaica NC021751 1            | Galidia elegans D146 1               | 0,19103354 |
| Ursus arctos GU573491 207             | Mungotictis decemlineata NC027828 2  | 0,19103359 |
| Genetta genetta T297 1                | Canis mesomelas KT448280 1           | 0,19103561 |
| Ursus arctos pruinus MG066703 3       | Mungos mungo MMC7 1                  | 0,19103687 |
| Fossa fossana D350 1                  | Ailuropoda melanoleuca NC009492 5    | 0,19103956 |
| Ursus arctos GU573486 5               | Mungotictis decemlineata NC027828 2  | 0,19103958 |
| Vulpes zerda KJ603240 1               | Ursus thibetanus formosanus NC0093   | 0,19103985 |
| Speothos venaticus C48 2              | Martes martes T302 3                 | 0,1910401  |
| Panthera tigris NC010642 35           | Arctocepalus forsteri KT693377 17    | 0,19104064 |
| Ursus arctos EU497665 29              | Otocyon megalotis SAF1 2             | 0,19104066 |
| Mephitis mephitis NC020648 1          | Urva javanica T413 1                 | 0,19104151 |
| Poecillogale albinucha T602 1         | Cryptoprocta ferox CFC13 1           | 0,19104198 |
| Parahyaena brunnea NC038159 15        | Otocyon megalotis SAF1 2             | 0,19104314 |
| Ursus maritimus GU573488 Svalbard     | Pardofelis marmorata NLN3 2          | 0,19104338 |
| Vulpes ferrillata NC027935 1          | Mephitis mephitis NC020648 1         | 0,19104379 |
| Ursus arctos GU573486 5               | Paradoxurus hermaphroditus NLNC 1    | 0,19104625 |
| Parahyaena brunnea NC038159 15        | Lyaon pictus NC028427 2              | 0,19104663 |
| Panthera tigris NC010642 35           | Martes pennanti NC020664 16          | 0,19105038 |
| Zalophus wolfebaeki SRR4431565 1      | Chrysocyon brachyurus NC024172 1     | 0,19105405 |
| Ursus arctos AP012576 6               | Paradoxurus hermaphroditus NLNC 1    | 0,1910557  |
| Ursus spelaeus EU327344 13            | Prionodon pardicolor NC024569 2      | 0,19105621 |
| Bassaricyon neblina SRX1097850 1      | Acinonyx jubatus NC005212 3          | 0,19105655 |
| Ursus americanus JX196366 3           | Bdeogale nigripes GLC15 1            | 0,19106102 |
| Panthera tigris NC010642 35           | Lycalopex securus KT448284 1         | 0,19106264 |
| Urva javanica/auropunctata NC006835   | Arctotherium sp NC030174 1           | 0,19106625 |
| Tremarctos ornatus NC009969 2         | Canis lupus chanco NC010340 4        | 0,19106701 |
| Ursus americanus JX196366 3           | Hyaina hyaena NC020669 1             | 0,1910689  |
| Zalophus californianus NC008416 1     | Chrysocyon brachyurus NC024172 1     | 0,19107087 |
| Cynogale bennetti KY117544 1          | Canis mesomelas KT448280 1           | 0,19108345 |
| Panthera leo spelaea KX258452 2       | Canis mesomelas KT448280 1           | 0,19108351 |
| Canis anthus NC027956 2               | Arctocepalus forsteri KT693377 17    | 0,19108583 |
| Vulpes ferrillata NC027935 1          | Lutra sumatrana NC035810 1           | 0,19108807 |
| Vulpes lagopus NC026529 3             | Mustela itatsi NC034330 19           | 0,19108959 |
| Urocyon cinereoargenteus NC026723 2   | Bassaricyon sumichrasti SRX1099089 1 | 0,19109058 |
| Ursus americanus JX196366 3           | Galictis vittata T412 1              | 0,19109109 |
| Tremarctos ornatus NC009969 2         | Nyctereutes procyonoides NC013700 3  | 0,19109181 |
| Cryptoprocta ferox CFC13 1            | Bassaricyon sumichrasti SRX1099089 1 | 0,19109441 |
| Vulpes ferrillata NC027935 1          | Paradoxurus hermaphroditus NLNC 1    | 0,19109501 |
| Poecillogale albinucha T602 1         | Atilax paludinosus T606 1            | 0,19109623 |
| Speothos venaticus C48 2              | Fossa fossana D350 1                 | 0,19109729 |
| Ursus maritimus NC003428 31           | Bdeogale nigripes GLC15 1            | 0,19109778 |
| Otocyon megalotis SAF1 2              | Arctonyx collaris NC020645 1         | 0,1910982  |
| Panthera pardus japonensis KJ866876   | Arctocepalus australis MG023139 1    | 0,19109881 |
| Genetta servalina NC024568 2          | Bassaricyon neblina SRX1097850 1     | 0,19110005 |
| Paradoxurus hermaphroditus NLNC 1     | Aonyx cinerea NC035814 2             | 0,19110067 |
| Phocartos hookeri NC008418 1          | Panthera pardus japonensis KJ866876  | 0,19110185 |
| Chrysocyon brachyurus NC024172 1      | Arctocepalus gazella BK010918 1      | 0,1911021  |
| Panthera leo spelaea KX258452 2       | Martes americana NC020642 1          | 0,19110385 |
| Speothos venaticus C48 2              | Chrotogale owstoni T607 1            | 0,19110397 |
| Ursus arctos GU573486 5               | Bdeogale nigripes GLC15 1            | 0,19110428 |
| Vulpes vulpes NC008434 5              | Ailuropoda melanoleuca NC009492 5    | 0,19110445 |
| Otaria byronia OTAB 1                 | Crocota crocata NC020670 3           | 0,19110448 |
| Procyon lotor AB462046 3              | Panthera uncia NC010638 1            | 0,19110492 |
| Panthera uncia NC010638 1             | Arctotherium sp NC030174 1           | 0,19110601 |
| Meles anakuma NC009677 1              | Crocota crocata NC020670 3           | 0,19110624 |
| Melurus ursinus NC009970 2            | Canis mesomelas KT448280 1           | 0,19110663 |
| Prionailurus rubiginosus NC028304 2   | Bassaricyon neblina SRX1097850 1     | 0,19110672 |
| Ursus arctos GU573486 5               | Galidia elegans D146 1               | 0,19110686 |
| Neophoca cinerea NC008419 1           | Chrysocyon brachyurus NC024172 1     | 0,19110775 |
| Urva brachyura KY117547 1             | Ailuropoda melanoleuca NC009492 5    | 0,19110778 |
| Lyaon pictus NC028427 2               | Hyaina hyaena NC020669 1             | 0,19110847 |
| Ursus thibetanus thibetanus NC011118  | Eupleres goudotii D128 1             | 0,1911087  |
| Ursus arctos GU573491 207             | Parahyaena brunnea NC038159 15       | 0,19110915 |
| Ursus spelaeus EU327344 13            | Cynictis penicillata T375 1          | 0,19111118 |
| Galidictis fasciata DM333 1           | Galictis vittata T412 1              | 0,19111516 |
| Ursus arctos GU573486 5               | Galerella sanguinea T378 1           | 0,19111551 |
| Vulpes corsac NC023958 1              | Diplogale hosei MH464790 1           | 0,19111598 |
| Mustela altaica NC021751 1            | Crocota crocata NC020670 3           | 0,19111656 |
| Lycalopex securus KT448284 1          | Aonyx cinerea NC035814 2             | 0,19111666 |
| Ursus spelaeus EU327344 13            | Panthera uncia KP202269 1            | 0,19111954 |
| Ursus arctos EU497665 29              | Panthera onca NC022842 1             | 0,19112042 |
| Spilogale putorius NC010497 1         | Arctocepalus townsendi NC008420 1    | 0,19112477 |
| Ursus spelaeus EU327344 13            | Panthera tigris amoyensis NC014770 2 | 0,19112688 |
| Ursus thibetanus formosanus NC0093    | Panthera tigris amoyensis NC014770 2 | 0,19112836 |
| Neofelis nebulosa NC008450 3          | Mustela eversmanni NC028013 1        | 0,19113532 |
| Vulpes ferrillata NC027935 1          | Eumetopias jubatus NC004030 10       | 0,19113921 |
| Mungotictis decemlineata NC027828     | Arctocepalus forsteri NC004023 28    | 0,19114219 |
| Ursus americanus JX196366 3           | Felis nigripes NC028309 1            | 0,19114225 |
| Ursus thibetanus thibetanus NC011118  | Odobenus rosmarus NC004029 29        | 0,19114338 |
| Paradoxurus hermaphroditus NC03959    | Lutra lutra NC01358 9                | 0,19114518 |
| Spilogale putorius NC010497 1         | Leopardus geoffroyi NC028320 1       | 0,19114667 |
| Urocyon littoralis catalinae KP129018 | Genetta abyssinica MG489822 1        | 0,19114757 |
| Lontra canadensis SRR10409165 1       | Urva javanica T413 1                 | 0,19115068 |
| Vulpes corsac NC023958 1              | Galerella sanguinea T378 1           | 0,19115265 |
| Phocartos hookeri NC008418 1          | Helogale parvula SRR7637809 1        | 0,1911529  |

|                                          |                                       |            |
|------------------------------------------|---------------------------------------|------------|
| Suricata suricatta SSM10 1               | Pusa sibirica NC008432 2              | 0,17768651 |
| Lynx rufus NC014456 3                    | Enhydra lutris NC009692 1             | 0,17769401 |
| Prionailurus planiceps KY682741 4        | Mustela frenata NC020640 1            | 0,17769593 |
| Phoca fasciata NC008428 1                | Halogale parvula SRR7637809 1         | 0,17769639 |
| Arctodus simus NC011116 1                | Arctocepalus gazella BK010918 1       | 0,17769665 |
| Phoca groenlandica NC008429 54           | Mungotictis decemlineata NC027828 1   | 0,17769907 |
| Mustela frenata NC020640 1               | Leopardus geoffroyi NC028320 1        | 0,17769967 |
| Monachus schauinslandi NC008421 1        | Bassaricyon neblina SRX1097850 1      | 0,17770264 |
| Zalophus californianus NC008416 1        | Martes melampus NC009678 1            | 0,17770973 |
| Martes foina NC020643 1                  | Lynx canadensis NC028313 1            | 0,17771022 |
| Neovison vison NC020641 3                | Leopardus pardalis NC028315 1         | 0,17771243 |
| Mephitis mephitis NC020648 1             | Meles leucurus NC039173 4             | 0,17771439 |
| Zalophus californianus NC008416 1        | Neovison vison NC020641 3             | 0,17772593 |
| Eumetopias jubatus NC004030 10           | Ailurus fulgens NC011124 1            | 0,17772774 |
| Phoca fasciata NC008428 1                | Panthera leo NERO 19                  | 0,17773849 |
| Nasua nasua NC020647 1                   | Martes melampus NC009678 1            | 0,1777468  |
| Lutra sumatrana NC035810 1               | Arctocepalus pusillus NC008417 1      | 0,17775127 |
| Panthera uncia KP202269 1                | Halichoerus grypus NC001602 2         | 0,17775139 |
| Otaria byronia OTAB 1                    | Lutra lutra LC050126 1                | 0,17775165 |
| Mustela erminea T305 2                   | Arctocepalus forsteri KT693377 17     | 0,17775245 |
| Meles leucurus NC039173 4                | Homotherium latidens MF871702 3       | 0,17775704 |
| Poecilogale albinucha T602 1             | Homotherium latidens MF871702 3       | 0,17775868 |
| Paguma larvata PDS11 2                   | Mustela frenata NC020640 1            | 0,17775874 |
| Taxidea taxus NC020646 1                 | Mungos mungo MMC7 1                   | 0,17775901 |
| Meles leucurus NC039173 4                | Lynx pardinus NC028319 161            | 0,17775936 |
| Neovison vison NC020641 3                | Crossarchus platycephalus C7R66 1     | 0,1777619  |
| Martes foina NC020643 1                  | Callorhinus ursinus NC008415 1        | 0,17776218 |
| Viverricula indica NC025296 2            | Mustela kathiah NC023210 1            | 0,17776647 |
| Mustela sibirica AP017394 11             | Arctodus simus NC011116 1             | 0,17776767 |
| Mustela erminea T305 2                   | Arctotherium sp NC030174 1            | 0,17776679 |
| Taxidea taxus NC020646 1                 | Felis silvestris lybica KP202275 4    | 0,17776775 |
| Vulpes ferrilata NC027935 1              | Lobodon carinophaga NC008423 1        | 0,17776953 |
| Pusa sibirica NC008432 2                 | Panthera tigris amoyensis NC014770 2  | 0,17777467 |
| Pusa caspica NC008431 1                  | Panthera tigris NC010642 35           | 0,17777483 |
| Pusa caspica NC008431 1                  | Galictis vittata T412 1               | 0,1777762  |
| Meles leucurus NC039173 4                | Leopardus colocolo NC028314 1         | 0,17777941 |
| Ursus arctos GU573486 5                  | Mustela erminea T305 2                | 0,17777967 |
| Erigonathus barbatus NC008426 1          | Canis lupus familiaris NC002008 1231  | 0,17778648 |
| Monachus schauinslandi NC008421 1        | Galictis vittata T412 1               | 0,17778924 |
| Phoca largha NC008430 1                  | Panthera onca NC022842 1              | 0,17779115 |
| Mirounga leonina NC008422 1              | Canis mesomelas KT448280 1            | 0,17779547 |
| Mustela erminea T305 2                   | Canis lupus chanco NC010340 4         | 0,17779726 |
| Mustela kathiah NC023210 1               | Canis adustus KT448271 1              | 0,17779842 |
| Mungos mungo/gambianus SRR7704821 1      | Halichoerus grypus NC001602 2         | 0,17780143 |
| Spilogale putorius NC010497 1            | Ailurus fulgens NC011124 1            | 0,17780462 |
| Mirounga leonina NC008422 1              | Cuon alpinus NC013445 3               | 0,177806   |
| Smilodon populator MF871700 1            | Mustela erminea T305 2                | 0,17780609 |
| Pusa caspica NC008431 1                  | Conepatus chinga NC042596 1           | 0,17781016 |
| Mustela kathiah NC023210 1               | Callorhinus ursinus NC008415 1        | 0,17781439 |
| Martes zibellina NC011579 39             | Callorhinus ursinus NC008415 1        | 0,17781755 |
| Mustela erminea T305 2                   | Arctocepalus townsendi NC008420 1     | 0,17781895 |
| Phocarcctos hookeri NC008418 1           | Mustela erminea T305 2                | 0,17782079 |
| Nandiniya binotata NC024567 1            | Canis latrans NC008093 7              | 0,17782222 |
| Paradoxurus hermaphroditus NLNC 1        | Mustela frenata NC020640 1            | 0,17782421 |
| Poecilogale albinucha T602 1             | Ommatophoca rossii AY377287etc 1      | 0,17782477 |
| Aonyx cinerea NC035814 2                 | Ailurus fulgens NC011124 1            | 0,17782573 |
| Lutra lutra LC050126 1                   | Arctodus simus NC011116 1             | 0,17782891 |
| Monachus schauinslandi NC008421 1        | Urva brachyura KY117547 1             | 0,17783159 |
| Viverra tangalunga MH464792 1            | Puma concolor NC016470 22             | 0,17783189 |
| Zalophus wolfebaeki SRR4431565 1         | Martes melampus NC009678 1            | 0,17783208 |
| Pusa caspica NC008431 1                  | Felis chaus NC028307 1                | 0,177835   |
| Prionailurus bengalensis CKM45 20        | Mustela kathiah NC023210 1            | 0,17783587 |
| Urocyon littoralis catalinae KP129018 15 | Hydrurga leptonyx NC008425 1          | 0,17783777 |
| Urocyon cinereoargenteus NC026723 21     | Hydrurga leptonyx NC008425 1          | 0,17783782 |
| Ursus thibetanus mupiniensis NC008753 2  | Arctonyx collaris NC020645 1          | 0,17783956 |
| Monachus schauinslandi NC008421 1        | Canis aureus KT448274 1               | 0,17784092 |
| Phoca groenlandica NC008429 54           | Catopuma temminckii NC027115 41       | 0,1778425  |
| Paradoxurus hermaphroditus NC039591 1    | Mirounga angustirostris SRR10331586 1 | 0,17784795 |
| Lobodon carinophaga NC008423 1           | Hyaena hyaena NC020669 1              | 0,17784885 |
| Ommatophoca rossii AY377287etc 1         | Martes pennanti NC020664 16           | 0,17785624 |
| Erigonathus barbatus NC008426 1          | Canis lupus chanco NC010340 4         | 0,17785634 |
| Ursus americanus JX196366 3              | Potos flavus T414 1                   | 0,17786483 |
| Ommatophoca rossii AY377287etc 1         | Caracal caracal NC028306 1            | 0,1778672  |
| Nandiniya binotata NC024567 1            | Tapirus terrestris T358               | 0,17787299 |
| Hemigalus derbyanus MH464791 1           | Arctodus simus NC011116 1             | 0,17787586 |
| Meles anakuma NC009677 1                 | Callorhinus ursinus NC008415 1        | 0,17787904 |
| Leptonyx chotes weddellii NC008424 1     | Cynogale bennetti KY117544 1          | 0,17788021 |
| Pusa caspica NC008431 1                  | Urva brachyura KY117547 1             | 0,1778885  |
| Pusa caspica NC008431 1                  | Urva javanica T413 1                  | 0,1778885  |
| Hyaena hyaena NC020669 1                 | Halichoerus grypus NC001602 2         | 0,17788929 |
| Ursus arctos isabellinus 18B5 2          | Ommatophoca rossii AY377287etc 1      | 0,17789268 |
| Mungotictis decemlineata NC027828 1      | Mirounga leonina NC008422 1           | 0,17789274 |
| Zalophus californianus NC008416 1        | Martes flavigula NC012141 3           | 0,17789291 |
| Martes martes T302 3                     | Arctocepalus pusillus NC008417 1      | 0,17789404 |
| Neovison vison NC020641 3                | Arctocepalus australis MG023139 1     | 0,1778942  |
| Taxidea taxus NC020646 1                 | Attilax paludinosus T606 1            | 0,17789549 |
| Puma yagouaroundi NC028311 1             | Meles leucurus NC039173 4             | 0,1778959  |
| Otaria byronia OTAB 1                    | Mustela frenata NC020640 1            | 0,17789702 |
| Zalophus wolfebaeki SRR4431565 1         | Arctotherium sp NC030174 1            | 0,177898   |
| Pusa caspica NC008431 1                  | Lycan pictus NC028427 2               | 0,17789906 |
| Prionailurus planiceps NC028312 6        | Mustela erminea T305 2                | 0,17790101 |
| Martes zibellina NC011579 39             | Lynx pardinus NC028319 161            | 0,17790124 |
| Arctonyx collaris NC020645 1             | Arctodus simus NC011116 1             | 0,17790239 |
| Homotherium latidens MF871702 3          | Tapirus terrestris T358               | 0,17790779 |
| Neovison vison NC020641 3                | Leopardus wiedii NC028318 1           | 0,17791028 |
| Procyon lotor AB462046 3                 | Galictis vittata T412 1               | 0,17791124 |
| Ursus thibetanus thibetanus NC011118 4   | Nandiniya binotata NC024567 1         | 0,17791361 |
| Phoca largha NC008430 1                  | Panthera uncia KP202269 1             | 0,17791478 |
| Viverra tangalunga MH464792 1            | Acinonyx jubatus NC005212 3           | 0,1779152  |
| Mirounga angustirostris SRR10331586 1    | Lycan pictus NC028427 2               | 0,17791803 |
| Phoca fasciata NC008428 1                | Chrysocyon brachyurus NC024172 1      | 0,17792268 |
| Phoca largha NC008430 1                  | Galictis vittata T412 1               | 0,1779238  |
| Martes americana NC020642 1              | Eumetopias jubatus NC004030 10        | 0,17792693 |

|                                       |                                       |            |
|---------------------------------------|---------------------------------------|------------|
| Vulpes corsac NC023958 1              | Meles leucurus NC039173 4             | 0,19115303 |
| Mungos mungo/gambianus SRR77048       | Lutrogale perspicillata NC035811 1    | 0,19115637 |
| Urocyon littoralis catalinae KP129018 | Mustela itatsi NC034330 19            | 0,19115965 |
| Speothos venaticus C48 2              | Enhydra lutris NC009692 1             | 0,19116053 |
| Lycan pictus NC028427 2               | Eupleres goudotii D128 1              | 0,19116116 |
| Vulpes vulpes NC008434 5              | Otaria byronia OTAB 1                 | 0,1911613  |
| Otocyon megalotis SAF1 2              | Cynictis penicillata T375 1           | 0,19116187 |
| Phocarcctos hookeri NC008418 1        | Galerella sanguinea T378 1            | 0,19116333 |
| Urocyon cinereoargenteus NC026723 2   | Melogale moschata NC020644 1          | 0,19116446 |
| Urocyon littoralis catalinae KP129018 | Melogale moschata NC020644 1          | 0,19116446 |
| Ursus maritimus NC003428 31           | Xenogale naso C07XAR110 1             | 0,19116494 |
| Vulpes ferrilata NC027935 1           | Ursus thibetanus mupiniensis NC008753 | 0,19116504 |
| Speothos venaticus C48 2              | Mungos mungo MMC7 1                   | 0,19116546 |
| Procyon lotor AB462046 3              | Otocyon megalotis SAF1 2              | 0,191166   |
| Prionodon pardicolor NC024569 2       | Aonyx cinerea NC035814 2              | 0,19116688 |
| Panthera uncia NC010638 1             | Lontra canadensis SRR10409165 1       | 0,19116804 |
| Ursus arctos EU497665 29              | Mungotictis decemlineata NC027828 1   | 0,19116884 |
| Panthera uncia KP202269 1             | Neophoca cinerea NC008419 1           | 0,19116883 |
| Melogale moschata V0735A 1            | Crocota crocata NC020670 3            | 0,19116887 |
| Lycan pictus NC028427 2               | Cynogale bennetti KY117544 1          | 0,19116895 |
| Paradoxurus hermaphroditus NC03959    | Arctotherium sp NC030174 1            | 0,19116943 |
| Urocyon cinereoargenteus NC026723 2   | Leptailurus serval NC028316 1         | 0,19117017 |
| Panthera uncia NC010638 1             | Arctocepalus pusillus NC008417 1      | 0,19117047 |
| Phocarcctos hookeri NC008418 1        | Felis chaus NC028307 1                | 0,19117071 |
| Cryptoprocta ferox FC13 1             | Arctotherium sp NC030174 1            | 0,19117127 |
| Procyon lotor AB462046 3              | Prionodon pardicolor NC024569 2       | 0,19117209 |
| Otocyon megalotis SAF1 2              | Hyaena hyaena NC020669 1              | 0,19117393 |
| Ursus thibetanus laniger MH281753 2   | Attilax paludinosus T606 1            | 0,19117619 |
| Zalophus wolfebaeki SRR4431565 1      | Galidia elegans D146 1                | 0,19117619 |
| Vulpes ferrilata NC027935 1           | Ursus thibetanus thibetanus NC011118  | 0,19117638 |
| Vulpes lagopus NC026529 3             | Panthera leo spelaea KX258452 2       | 0,19117802 |
| Ursus arctos EU497665 29              | Pardofelis marmorata NLN3 2           | 0,1911781  |
| Ursus arctos GU573491 207             | Felis nigripes NC028309 1             | 0,1911784  |
| Ursus arctos AP012576 6               | Prionodon linsang ERR2391707 1        | 0,19117929 |
| Lontra canadensis SRR10409165 1       | Ailuropoda melanoleuca NC009492 5     | 0,19118083 |
| Ursus arctos GU573486 5               | Otocyon megalotis SAF1 2              | 0,19118109 |
| Ictonyx striatus T299 1               | Canis anthus NC027956 2               | 0,19118302 |
| Ursus arctos AP012576 6               | Canis anthus NC027956 2               | 0,19118392 |
| Ursus maritimus NC003428 31           | Panthera onca NC022842 1              | 0,19118765 |
| Panthera leo spelaea KX258452 2       | Mustela altaica NC021751 1            | 0,19118783 |
| Poecilogale albinucha T602 1          | Panthera leo spelaea KX258452 2       | 0,1911885  |
| Canis lupus chanco NC010340 4         | Callorhinus ursinus NC008415 1        | 0,1911917  |
| Paradoxurus hermaphroditus NC03959    | Arctocepalus forsteri NC040023 28     | 0,19119222 |
| Ursus americanus JX196366 3           | Urva javanica T413 1                  | 0,19119619 |
| Galerella sanguinea T378 1            | Cuon alpinus NC013445 3               | 0,19119743 |
| Panthera leo NERO 19                  | Arctocepalus australis MG023139 1     | 0,1912019  |
| Zalophus californianus NC008416 1     | Canis mesomelas KT448280 1            | 0,19120301 |
| Cuon alpinus NC013445 3               | Attilax paludinosus T606 1            | 0,19120526 |
| Urva brachyura KY117547 1             | Cuon alpinus NC013445 3               | 0,19120583 |
| Vulpes ferrilata NC027935 1           | Panthera pardus NC010641 5            | 0,1912092  |
| Profelis aurata NC028299 1            | Arctocepalus forsteri NC040023 28     | 0,19121715 |
| Vulpes vulpes NC008434 5              | Lontra canadensis SRR10409165 1       | 0,1912189  |
| Martes martes T302 3                  | Diplogale hosoi MH464790 1            | 0,19121967 |
| Vulpes ferrilata NC027935 1           | Urva brachyura KY117547 1             | 0,19122116 |
| Ursus americanus JX196366 3           | Panthera onca NC022842 1              | 0,19122268 |
| Urva brachyura KY117547 1             | Bassaricyon neblina SRX1097850 1      | 0,19122285 |
| Tremarctos ornatus NC009969 2         | Prionodon linsang ERR2391707 1        | 0,1912239  |
| Urocyon littoralis catalinae KP129018 | Mustela frenata NC020640 1            | 0,19122593 |
| Canis mesomelas KT448280 1            | Ailuropoda melanoleuca NC009492 5     | 0,19122919 |
| Vulpes corsac NC023958 1              | Ursus maritimus NC003428 31           | 0,19123021 |
| Vulpes vulpes NC026529 3              | Cryptoprocta ferox FC13 1             | 0,19123064 |
| Ursus arctos isabellinus 18B5 2       | Mungos mungo/gambianus SRR77048       | 0,19123226 |
| Ursus arctos GU573491 207             | Halogale parvula SRR7637809 1         | 0,19123232 |
| Poecilogale albinucha T602 1          | Nyctereutes procyonoides NC013700 3   | 0,19123286 |
| Profelis aurata NC028299 1            | Arctocepalus townsendi NC008420 1     | 0,19123301 |
| Zalophus wolfebaeki SRR4431565 1      | Tapirus terrestris T358               | 0,19123323 |
| Speothos venaticus C48 2              | Meles leucurus NC039173 4             | 0,19123444 |
| Paguma larvata PDS11 2                | Aonyx cinerea NC035814 2              | 0,19123463 |
| Eupleres goudotii D128 1              | Canis mesomelas KT448280 1            | 0,19123465 |
| Paradoxurus hermaphroditus NC03959    | Neophoca cinerea NC008419 1           | 0,19123474 |
| Panthera uncia NC010638 1             | Canis anthus NC027956 2               | 0,19123483 |
| Galidictis fasciata DM333 1           | Canis mesomelas KT448280 1            | 0,19123507 |
| Nasua nasua NC020647 1                | Lynx lynx NC027083 4                  | 0,19123566 |
| Zalophus wolfebaeki SRR4431565 1      | Canis anthus NC027956 2               | 0,19123696 |
| Otocyon megalotis SAF1 2              | Otaria byronia OTAB 1                 | 0,191237   |
| Urocyon cinereoargenteus NC026723 2   | Otocolobus manul NC028323 1           | 0,19123739 |
| Ursus maritimus NC003428 31           | Canis anthus NC027956 2               | 0,19123739 |
| Zalophus wolfebaeki SRR4431565 1      | Vulpes corsac NC023958 1              | 0,19123767 |
| Speothos venaticus C48 2              | Arctonyx collaris NC020645 1          | 0,19123855 |
| Urocyon cinereoargenteus NC026723 2   | Leopardus geoffroyi NC028320 1        | 0,19123855 |
| Tremarctos ornatus NC009969 2         | Paradoxurus hermaphroditus NC03959    | 0,1912394  |
| Procyon lotor AB462049 4              | Panthera pardus japonensis KJ866876   | 0,19123973 |
| Melogale moschata V0735A 1            | Ailuropoda melanoleuca NC009492 5     | 0,1912405  |
| Speothos venaticus C48 2              | Procyon lotor AB462046 3              | 0,19124052 |
| Vulpes vulpes NC008434 5              | Ursus thibetanus formosanus NC0093    | 0,19124207 |
| Leopardus tigrinus NC028317 1         | Bassaricyon neblina SRX1097850 1      | 0,19124098 |
| Vulpes zerdia KJ603240 1              | Panthera tigris NC010642 35           | 0,19124161 |
| Panthera tigris NC010642 35           | Mustela sibirica AP017394 11          | 0,19124167 |
| Ursus arctos EU497665 29              | Paradoxurus hermaphroditus NLNC 1     | 0,19124182 |
| Proteles cristata T393 6              | Potos flavus T414 1                   | 0,19124208 |
| Odobenus rosmarus NC004029 29         | Mustela itatsi NC034330 19            | 0,19124219 |
| Vulpes vulpes NC008434 5              | Helarctos malayanus NC009968 2        | 0,19124292 |
| Vulpes lagopus NC026529 3             | Ursus thibetanus laniger MH281753 2   | 0,19124337 |
| Vulpes corsac NC023958 1              | Melursus ursinus NC009970 2           | 0,19124408 |
| Ursus maritimus NC003428 31           | Panthera uncia NC010638 1             | 0,19124494 |
| Mungos mungo/gambianus SRR77048       | Mephitis mephitis NC020648 1          | 0,19125037 |
| Odobenus rosmarus NC004029 29         | Aonyx cinerea NC035814 2              | 0,19125347 |
| Canis aureus KT448274 1               | Callorhinus ursinus NC008415 1        | 0,1912557  |
| Paradoxurus hermaphroditus NLNC 1     | Melursus ursinus NC009970 2           | 0,19125731 |
| Ursus arctos AP012576 6               | Prionailurus planiceps NC028312 6     | 0,19126254 |
| Lycalopex secureax KT448284 1         | Ictonyx striatus T299 1               | 0,191264   |
| Vulpes corsac NC023958 1              | Spilogale putorius NC010497 1         | 0,19126569 |
| Meles leucurus NC039173 4             | Tapirus terrestris T358               | 0,19127165 |

|                                        |                                       |            |
|----------------------------------------|---------------------------------------|------------|
| Zalophus wollebaeki SRR4431565 1       | Helarctos malayanus NCO09968 2        | 0,17792851 |
| Spilogale putorius NCO10497 1          | Mustela sibirica NCO20637 6           | 0,17793144 |
| Pusa caspica NCO08431 1                | Panthera pardus NCO10641 5            | 0,17793871 |
| Spilogale putorius NCO10497 1          | Ommatophoca rossii AY377287etc 1      | 0,17794299 |
| Tremarctos ornatus NCO09969 2          | Taxidea taxus NCO20646 1              | 0,17794859 |
| Meles anakuma NCO09677 1               | Bassaricyon neblina SRX1097850 1      | 0,17794953 |
| Mustela sibirica NCO20637 6            | Callorhinus ursinus NCO08415 1        | 0,17794968 |
| Meles meles T303 3                     | Conepatus chinga NCO42596 1           | 0,1779542  |
| Mustela erminea T305 2                 | Urva semitorquata MH464789 1          | 0,1779563  |
| Erigonathus barbatus NCO08426 1        | Canis anthus NCO27956 2               | 0,17795695 |
| Tremarctos ornatus NCO09969 2          | Mustela erminea T305 2                | 0,17795838 |
| Parahyaena brunnea NCO38159 15         | Halichoerus grypus NCO01602 2         | 0,17795846 |
| Taxidea taxus NCO20646 1               | Paguma larvata PDD511 2               | 0,17796242 |
| Prionailurus rubiginosus NCO28304 2    | Meles meles T303 3                    | 0,17796347 |
| Martes zibellina NCO11579 39           | Arctodus simus NCO11116 1             | 0,17796549 |
| Pusa hispida NC 008433 1               | Necogale naso CO7XAR110 1             | 0,17796625 |
| Arctotherium sp NCO30174 1             | Ailurus fulgens styani NCO09691 1     | 0,17796767 |
| Viverra tangalunga MH464792 1          | Puma yagouaroundi NCO28311 1          | 0,17796706 |
| Mustela nigripes NCO02492 1            | Leopardus wiedii NCO28318 1           | 0,17796709 |
| Phoca fasciata NCO08428 1              | Paradoxurus jerdoni MH464793 1        | 0,17796782 |
| Viverra tangalunga MH464792 1          | Leptailurus serval NCO28316 1         | 0,17796783 |
| Ursus thibetanus mupinensis NCO08753 2 | Nandinia binotata NCO24567 1          | 0,17796788 |
| Pusa caspica NCO08431 1                | Mephitis mephitis NCO20648 1          | 0,17797479 |
| Mustela nigripes NCO02492 1            | Hemigalus derbyanus MH464791 1        | 0,17797998 |
| Prionailurus rubiginosus NCO28304 2    | Martes foina NCO20643 1               | 0,17798211 |
| Monachus schauinslandi NCO08421 1      | Cryptoprocta ferox FC13 1             | 0,1779826  |
| Zalophus californianus NCO08416 1      | Martes zibellina NCO11579 39          | 0,17798354 |
| Mustela frenata NCO20640 1             | Leopardus colocolo NCO28314 1         | 0,1779843  |
| Taxidea taxus NCO20646 1               | Leopardus colocolo NCO28314 1         | 0,17798947 |
| Ommatophoca rossii AY377287etc 1       | Melogale moschata KP726273 1          | 0,17799804 |
| Catopuma badia NCO28300 1              | Canis lupus familiaris NCO02008 1231  | 0,17800635 |
| Chrotogale owstoni T607 1              | Canis adustus KT448271 1              | 0,1780189  |
| Nasua nasua NCO20647 1                 | Martes zibellina NCO11579 39          | 0,17802092 |
| Mustela erminea T305 2                 | Conepatus chinga NCO42596 1           | 0,17802283 |
| Nyctereutes procyonoides NCO13700 3    | Nandinia binotata NCO24567 1          | 0,17802495 |
| Mirounga leonina NCO08422 1            | Lutroga perspicillata NCO35811 1      | 0,17802727 |
| Meles leucurus NCO39173 4              | Leopardus tigrinus NCO28317 1         | 0,1780297  |
| Lynx lynx NCO27083 4                   | Lutra lutra NCO11358 9                | 0,17803076 |
| Viverra tangalunga MH464792 1          | Lynx lynx NCO27083 4                  | 0,17803219 |
| Phoca groenlandica NCO08429 54         | Mungos mungo/gambianus SRR7704821 1   | 0,17803317 |
| Monachus schauinslandi NCO08421 1      | Lontra canadensis SRR10409165 1       | 0,17803542 |
| Puma yagouaroundi NCO28311 1           | Mustela erminea T305 2                | 0,17803618 |
| Lynx lynx NCO27083 4                   | Bassaricyon sumichrasti SRX1099089 1  | 0,17803741 |
| Taxidea taxus NCO20646 1               | Leopardus jacobita NCO28322 1         | 0,17803851 |
| Ursus thibetanus mupinensis NCO08753 2 | Meles leucurus NCO39173 4             | 0,17803879 |
| Mungotictis decemlineata NCO27828 1    | Monachus schauinslandi NCO08421 1     | 0,17804071 |
| Ursus maritimus GU573488 Svalbard      | Mustela erminea T305 2                | 0,17804249 |
| Panthera onca KP202264 2               | Monachus schauinslandi NCO08421 1     | 0,17804493 |
| Ursus thibetanus formosanus NCO09331 1 | Nandinia binotata NCO24567 1          | 0,17804557 |
| Panthera uncia NCO10638 1              | Lobodon carinophaga NCO08423 1        | 0,17804569 |
| Meles leucurus NCO39173 4              | Acinonyx jubatus NCO05212 3           | 0,17804632 |
| Mustela altaica NCO21751 1             | Hemigalus derbyanus MH464791 1        | 0,17804742 |
| Zalophus californianus NCO08416 1      | Lutra sumatrana NCO35810 1            | 0,17804796 |
| Neovison vison NCO20641 3              | Civettictis civetta GLC19 1           | 0,17804945 |
| Viverricula indica NCO25296 2          | Bassaricyon sumichrasti SRX1099089 1  | 0,17804953 |
| Nandinia binotata NCO24567 1           | Canis lupus familiaris NCO02008 1231  | 0,17805275 |
| Gulo gulo NCO09685 3                   | Conepatus chinga NCO42596 1           | 0,17805631 |
| Phoca groenlandica NCO08429 54         | Diplogale hosei MH464790 1            | 0,17806047 |
| Hemigalus derbyanus MH464791 1         | Helarctos malayanus NCO09968 2        | 0,17806655 |
| Lycalopex sechurae KT448284 1          | Erigonathus barbatus NCO08426 1       | 0,17807215 |
| Spilogale putorius NCO10497 1          | Potos flavus T414 1                   | 0,17807403 |
| Viverricula indica KX891751 1          | Canis lupus chanco NCO10340 4         | 0,17807451 |
| Phoca vitulina NCO01325 1              | Panthera leo NERO 19                  | 0,17808118 |
| Mustela sibirica AP017394 11           | Callorhinus ursinus NCO08415 1        | 0,17808411 |
| Ommatophoca rossii AY377287etc 1       | Civettictis civetta NCO33378 1        | 0,17808656 |
| Crossarchus platycephalus C7R66 1      | Bassaricyon sumichrasti SRX1099089 1  | 0,17809276 |
| Nasua nasua NCO20647 1                 | Martes pennanti NCO20664 16           | 0,17809333 |
| Neovison vison NCO20641 3              | Arctocepalus forsteri KT693377 17     | 0,17809629 |
| Prionailurus bengalensis NCO28301 12   | Enhydra lutris NCO09692 1             | 0,17809652 |
| Panthera onca NCO22842 1               | Halichoerus grypus NCO01602 2         | 0,17809927 |
| Mustela frenata NCO20640 1             | Felis catus NCO01700 2                | 0,17810008 |
| Prionailurus viverrinus NCO28305 1     | Mustela frenata NCO20640 1            | 0,17810056 |
| Ommatophoca rossii AY377287etc 1       | Diplogale hosei MH464790 1            | 0,17810169 |
| Lycalopex pictus NCO28427 2            | Cystophora cristata NCO08427 1        | 0,17810179 |
| Phoca groenlandica NCO08429 54         | Mungos mungo MMC7 1                   | 0,17810197 |
| Meles leucurus NCO39173 4              | Arctodus simus NCO11116 1             | 0,17810306 |
| Mustela nigripes NCO02492 1            | Catopuma temminckii NCO27115 41       | 0,17810418 |
| Taxidea taxus NCO20646 1               | Leopardus tigrinus NCO28317 1         | 0,17810678 |
| Panthera leo spelaea KX258452 2        | Erigonathus barbatus NCO08426 1       | 0,17810772 |
| Meles meles T303 3                     | Genetta abyssinica MG489822 1         | 0,17810836 |
| Phoca fasciata NCO08428 1              | Panthera onca KP202264 2              | 0,17810935 |
| Paguma larvata PDD511 2                | Arctodus simus NCO11116 1             | 0,17811187 |
| Monachus schauinslandi NCO08421 1      | Galerella sanguinea T378 1            | 0,17811249 |
| Ursus thibetanus formosanus NCO09331 1 | Meles leucurus NCO39173 4             | 0,17811443 |
| Helarctos malayanus NCO09968 2         | Arctocepalus pusillus NCO08417 1      | 0,17811911 |
| Ursus spelaeus EU327344 13             | Hemigalus derbyanus MH464791 1        | 0,17812012 |
| Halichoerus grypus NCO01602 2          | Conepatus chinga NCO42596 1           | 0,17812042 |
| Panthera onca NCO22842 1               | Mirounga angustirostris SRX10331586 1 | 0,17812333 |
| Phoca vitulina NCO01325 1              | Panthera onca NCO22842 1              | 0,17812783 |
| Mustela erminea T305 2                 | Canis lupus familiaris NCO02008 1231  | 0,17812854 |
| Paradoxurus hermaphroditus NLNC 1      | Monachus monachus NCO44972 5          | 0,17812911 |
| Martes flavigula NCO12141 3            | Arctocepalus gazella BK010918 1       | 0,17813665 |
| Halichoerus grypus NCO01602 2          | Bdeogale nigripes GLC15 1             | 0,17813797 |
| Mirounga angustirostris SRR10331586 1  | Canis lupus chanco NCO10340 4         | 0,17814593 |
| Zalophus wollebaeki SRR4431565 1       | Martes flavigula NCO12141 3           | 0,17814887 |
| Mirounga leonina NCO08422 1            | Cynogale bennetti KY117544 1          | 0,17814897 |
| Halichoerus grypus NCO01602 2          | Galidictis fasciata DM33 1            | 0,17815107 |
| Pusa sibirica NCO08432 2               | Urva brachyura KY117547 1             | 0,17815782 |
| Vulpes vulpes NCO08434 5               | Cystophora cristata NCO08427 1        | 0,1781581  |
| Pusa sibirica NCO08432 2               | Paguma larvata PDD511 2               | 0,17816649 |
| Smilodon populator MF871700 1          | Potos flavus T414 1                   | 0,17816669 |
| Viverra tangalunga MH464792 1          | Leopardus pardalis T262 1             | 0,17816781 |
| Paguma larvata PDD511 2                | Mustela kathiah NCO23210 1            | 0,17816885 |

|                                       |                                      |             |
|---------------------------------------|--------------------------------------|-------------|
| Vulpes zerda KJ603240 1               | Panthera pardus NCO10641 5           | 0,19127215  |
| Panthera pardus NCO10641 5            | Arctocepalus australis MG023139 1    | 0,19127242  |
| Panthera leo spelaea KX258452 2       | Chrysocon brachyurus NCO24172 1      | 0,19127244  |
| Spilogale putorius NCO10497 1         | Lynx canadensis NCO28313 1           | 0,19128002  |
| Martes americana NCO20642 1           | Diplogale hosei MH464790 1           | 0,19128065  |
| Spilogale putorius NCO10497 1         | Otaria byronia OTAB 1                | 0,19128184  |
| Eucleres goudoti D128 1               | Ailurus fulgens NCO11124 1           | 0,19128367  |
| Ursus spelaeus NCO11112 8             | Urva javanica/auropunctata NCO06835  | 0,19128543  |
| Vulpes vulpes NCO08434 5              | Potos flavus T414 1                  | 0,19128709  |
| Vulpes lagopus NCO26529 3             | Potos flavus T414 1                  | 0,19128719  |
| Panthera tigris NCO10642 35           | Arctocepalus forsteri NCO04023 28    | 0,19128834  |
| Suricata suricatta SSM10 1            | Bassaricyon neblina SRX1097850 1     | 0,19128835  |
| Lontra canadensis SRR10409165 1       | Chrotogale owstoni T607 1            | 0,19128938  |
| Panthera onca KP202264 2              | Conepatus chinga NCO42596 1          | 0,19128947  |
| Nyctereutes procyonoides NCO13700 3   | Conepatus chinga NCO42596 1          | 0,1912896   |
| Ursus thibetanus laniger MH281753 2   | Urva javanica/auropunctata NCO06835  | 0,19129264  |
| Ursus spelaeus NCO11112 8             | Neofelis nebulosa NCO08450 3         | 0,19129273  |
| Otaria byronia OTAB 1                 | Galidia elegans D146 1               | 0,19129321  |
| Paradoxurus hermaphroditus NCO3959    | Martes americana NCO20642 1          | 0,19129525  |
| Vulpes corsac NCO23958 1              | Paradoxurus hermaphroditus NCO3959   | 0,19129641  |
| Panthera pardus NCO10641 5            | Helarctos malayanus NCO09968 2       | 0,19129667  |
| Vulpes corsac NCO23958 1              | Ursus maritimus GU573488 Svalbard    | 0,19129759  |
| Vulpes lagopus NCO26529 3             | Mustela altaica NCO21751 1           | 0,19129804  |
| Zalophus wollebaeki SRR4431565 1      | Canis latrans NCO08093 7             | 0,19130421  |
| Paradoxurus hermaphroditus NLNC 1     | Martes martes T302 3                 | 0,19130445  |
| Urocyon littoralis catalinae KP129018 | Caracal caracal NCO28306 1           | 0,19130459  |
| Panthera onca KP202264 2              | Crocota crocota NCO20670 3           | 0,19130474  |
| Vulpes ferrillata NCO27935 1          | Ailuropoda melanoleuca NCO09492 5    | 0,19130689  |
| Speothos venaticus C48 2              | Procyon lotor AB462049 4             | 0,19130729  |
| Mustela kathiah NCO23210 1            | Crocota crocota NCO20670 3           | 0,19130734  |
| Crocota crocota NCO20670 3            | Arctocepalus forsteri KT693377 17    | 0,19131079  |
| Panthera onca KP202264 2              | Arctotherium sp NCO30174 1           | 0,19131081  |
| Panthera pardus japonensis KJ866876   | Arctotherium sp NCO30174 1           | 0,191310829 |
| Prionailurus bengalensis NCO28301 12  | Bassaricyon neblina SRX1097850 1     | 0,191310901 |
| Odobenus rosmarus NCO04029 29         | Mustela sibirica NCO20637 6          | 0,191310965 |
| Ursus arctos EU497665 29              | Parahyaena brunnea NCO38159 15       | 0,19131097  |
| Tremarctos ornatus NCO09969 2         | Panthera tigris amoyensis NCO14770 2 | 0,19131126  |
| Melursus ursinus NCO09970 2           | Xenogale naso CO7XAR110 1            | 0,19131178  |
| Melogale moschata NCO20644 1          | Crocota crocota NCO20670 3           | 0,19131251  |
| Mephitis mephitis NCO20648 1          | Ichneumia albicauda T603 1           | 0,19131365  |
| Paradoxurus hermaphroditus NCO3959    | Martes foina NCO20643 1              | 0,19131437  |
| Procyon lotor AB462046 3              | Odobenus rosmarus NCO04029 29        | 0,19131465  |
| Panthera tigris NCO10642 35           | Arctotherium sp NCO30174 1           | 0,19131616  |
| Panthera leo spelaea KX258452 2       | Nyctereutes procyonoides NCO13700 3  | 0,19131671  |
| Panthera tigris amoyensis NCO14770 2  | Mustela nivalis T306 5               | 0,19131815  |
| Ursus arctos GU573486 5               | Pardofelis marmorata NLN3 2          | 0,19131893  |
| Panthera tigris amoyensis NCO14770 2  | Martes pennanti NCO20664 16          | 0,19131957  |
| Ursus arctos AP012576 6               | Galidia elegans D146 1               | 0,19131967  |
| Mephitis mephitis NCO20648 1          | Bassaricyon neblina SRX1097850 1     | 0,19132252  |
| Cryptoprocta ferox FC13 1             | Canis aureus KT448274 1              | 0,19132267  |
| Ursus thibetanus formosanus NCO09331  | Panthera uncia NCO10638 1            | 0,19132277  |
| Galictis vittata T412 1               | Felis chaus NCO28307 1               | 0,19132528  |
| Zalophus wollebaeki SRR4431565 1      | Crocota crocota NCO20670 3           | 0,19132808  |
| Speothos venaticus C48 2              | Ictonyx striatus T299 1              | 0,19132961  |
| Spilogale putorius NCO10497 1         | Urva javanica T413 1                 | 0,19133204  |
| Ichneumia albicauda T603 1            | Cono alpino NCO13445 3               | 0,19133623  |
| Spilogale putorius NCO10497 1         | Leopardus wiedii NCO28318 1          | 0,1913404   |
| Ursus americanus JX196366 3           | Parahyaena brunnea NCO38159 15       | 0,19134338  |
| Zalophus californianus NCO08416 1     | Canis lupus chanco NCO10340 4        | 0,19134483  |
| Prionodon linsang ERR2391707 1        | Callorhinus ursinus NCO08415 1       | 0,19134842  |
| Urva javanica T413 1                  | Tapirus terrestris T358              | 0,19135103  |
| Panthera uncia NCO10638 1             | Martes flavigula NCO12141 3          | 0,19135199  |
| Vulpes zerda KJ603240 1               | Lontra canadensis SRR10409165 1      | 0,19135486  |
| Urocyon littoralis catalinae KP129018 | Melogale moschata KP726273 1         | 0,19135676  |
| Vulpes vulpes NCO08434 5              | Ichneumia albicauda T603 1           | 0,19135766  |
| Mustela putorius NCO20638 4           | Cynogale bennetti KY117544 1         | 0,19135803  |
| Vulpes vulpes NCO08434 5              | Procyon lotor AB462049 4             | 0,19135974  |
| Urocyon littoralis catalinae KP129018 | Odobenus rosmarus NCO04029 29        | 0,19135991  |
| Galidia elegans D146 1                | Ailurus fulgens styani NCO09691 1    | 0,19136019  |
| Panthera pardus japonensis KJ866876   | Tapirus terrestris T358              | 0,19136111  |
| Panthera uncia NCO10638 1             | Ailurus fulgens styani NCO09691 1    | 0,19136274  |
| Poecilogale albinucha T602 1          | Urva brachyura KY117547 1            | 0,1913649   |
| Ursus arctos GU573491 207             | Mungos mungo/gambianus SRR77048      | 0,19136699  |
| Otaria byronia OTAB 1                 | Canis latrans NCO08093 7             | 0,19136713  |
| Procyon lotor AB462049 4              | Cryptoprocta ferox FC13 1            | 0,19136822  |
| Ursus americanus JX196366 3           | Odobenus rosmarus NCO04029 29        | 0,1913687   |
| Panthera uncia NCO10638 1             | Mustela altaica NCO21751 1           | 0,19137506  |
| Panthera leo spelaea KX258452 2       | Mustela itarsi NCO34330 19           | 0,19137585  |
| Panthera uncia NCO10638 1             | Martes pennanti NCO20664 16          | 0,19137609  |
| Mungos mungo MMC7 1                   | Ailuropoda melanoleuca NCO09492 5    | 0,19137621  |
| Vulpes zerda KJ603240 1               | Ursus thibetanus laniger MH281753 2  | 0,19137768  |
| Ursus arctos GU573491 207             | Panthera pardus japonensis KJ866876  | 0,19137913  |
| Ursus arctos pruinosus MG066703 3     | Felis nigripes NCO28309 1            | 0,19138077  |
| Conepatus chinga NCO42596 1           | Chrysocon brachyurus NCO24172 1      | 0,19138198  |
| Panthera uncia NCO10638 1             | Martes foina NCO20643 1              | 0,19138218  |
| Ursus thibetanus thibetanus NCO11112  | Nasua nasua NCO20647 1               | 0,191383    |
| Lynx lynx NCO27083 4                  | Ailuropoda melanoleuca NCO09492 5    | 0,19138511  |
| Canis lupus familiaris NCO02008 1231  | Callorhinus ursinus NCO08415 1       | 0,19138703  |
| Ursus arctos AP012576 6               | Mungotictis decemlineata NCO27828 1  | 0,19138749  |
| Ursus maritimus GU573488 Svalbard     | Panthera onca NCO22842 1             | 0,19138972  |
| Odobenus rosmarus NCO04029 29         | Martes pennanti NCO20664 16          | 0,19139095  |
| Vulpes corsac NCO23958 1              | Urva javanica/auropunctata NCO06835  | 0,19139299  |
| Panthera tigris amoyensis NCO14770 2  | Helarctos malayanus NCO09968 2       | 0,19139867  |
| Panthera tigris NCO10642 35           | Helarctos malayanus NCO09968 2       | 0,19139872  |
| Neofelis nebulosa NCO08450 3          | Martes melampus NCO09678 1           | 0,19140096  |
| Melogale moschata V0735A 1            | Canis mesomelas KT448280 1           | 0,19140494  |
| Phocarcos hookeri NCO08418 1          | Panthera leo NERO 19                 | 0,19140615  |
| Ursus arctos pruinosus MG066703 3     | Diplogale hosei MH464790 1           | 0,19140704  |
| Speothos venaticus C48 2              | Gulo gulo NCO09685 3                 | 0,19141103  |
| Panthera pardus NCO10641 5            | Lontra canadensis SRR10409165 1      | 0,19141239  |
| Callorhinus ursinus NCO08415 1        | Tapirus terrestris T358              | 0,19141687  |
| Ursus arctos pruinosus MG066703 3     | Panthera pardus NCO10641 5           | 0,19141838  |
| Urva javanica/auropunctata NCO06835   | Ailuropoda melanoleuca NCO09492 5    | 0,19141915  |

|                                        |                                       |            |
|----------------------------------------|---------------------------------------|------------|
| Mustela erminea T305 2                 | Genetta servalina NC024568 2          | 0,17817026 |
| Viverricula indica NC025296 2          | Canis anthus NC027956 2               | 0,17817143 |
| Prionailurus bengalensis CKM45 20      | Potos flavus T414 1                   | 0,17817423 |
| Lobodon carcinophaga NC008423 1        | Galidia elegans D146 1                | 0,17817573 |
| Phoca vitulina NC001325 1              | Panthera pardus japonensis KJ866876 8 | 0,17818375 |
| Taxidea taxus NC020646 1               | Acinonyx jubatus NC005212 3           | 0,17818636 |
| Panthera tigris NC010642 35            | Lobodon carcinophaga NC008423 1       | 0,17819059 |
| Mustela sibirica NC020637 6            | Eumetopias jubatus NC004030 10        | 0,17819534 |
| Bassariscus sumichrasti SRX1099089 1   | Acinonyx jubatus NC005212 3           | 0,17819667 |
| Mustela frenata NC020640 1             | Canis lupus chanco NC010340 4         | 0,17819959 |
| Ursa semitorquata MH464789 1           | Halichoerus grypus NC001602 2         | 0,17820662 |
| Spilogale putorius NC010497 1          | Procyon lotor AB462046 3              | 0,17821555 |
| Puma concolor NC016470 22              | Ommatophoca rossii AY377287etc 1      | 0,17822222 |
| Mustela frenata NC020640 1             | Arctocepalus australis MG023139 1     | 0,17822343 |
| Prionodon linsang ERR2391707 1         | Leptonychotes weddellii NC008424 1    | 0,17822516 |
| Neophoca cinerea NC008419 1            | Mustela erminea T305 2                | 0,1782257  |
| Vulpes lagopus NC026529 3              | Erigathus barbatus NC008426 1         | 0,17822607 |
| Viverricula indica XK891745 1          | Mustela frenata NC020640 1            | 0,17823114 |
| Phoca vitulina NC001325 1              | Chrotogale owstoni T607 1             | 0,17823267 |
| Phoca largha NC008430 1                | Chrotogale owstoni T607 1             | 0,17823303 |
| Mustela frenata NC020640 1             | Civettictis civetta GLC19 1           | 0,17823404 |
| Martes melampus NC009678 1             | Lynx canadensis NC028313 1            | 0,17823438 |
| Lutra sumatrana NC035810 1             | Arctotherium sp NC030174 1            | 0,17823525 |
| Mungos mungo/gambianus SRR7704821 1    | Monachus schauinslandi NC008421 1     | 0,17823572 |
| Puma yagouaroundi NC028311 1           | Lutra sumatrana NC035810 1            | 0,17823599 |
| Taxidea taxus NC020646 1               | Genetta genetta T297 1                | 0,17823745 |
| Potos flavus T414 1                    | Leopardus pardalis T262 1             | 0,17823887 |
| Mungotictis decemlineata NC027828 1    | Mirounga angustirostris SRR10331586 1 | 0,178241   |
| Taxidea taxus NC020646 1               | Lynx canadensis NC028313 1            | 0,17824109 |
| Mirounga angustirostris SRR10331586 1  | Galidictis fasciata DM333 1           | 0,17824115 |
| Monachus schauinslandi NC008421 1      | Galidictis fasciata DM333 1           | 0,17824295 |
| Martes foina NC020643 1                | Arctotherium sp NC030174 1            | 0,17824703 |
| Potos flavus T414 1                    | Helarctos malayanus NC009968 2        | 0,1782476  |
| Leopardus pardalis T262 1              | Arctodus simus NC011116 1             | 0,1782479  |
| Leptailurus serval NC028316 1          | Arctodus simus NC011116 1             | 0,17824884 |
| Mustela kathiah NC023210 1             | Acinonyx jubatus NC005212 3           | 0,1782507  |
| Zalophus californianus NC008416 1      | Meles meles T303 3                    | 0,17825221 |
| Zalophus californianus NC008416 1      | Martes martes T302 3                  | 0,17825267 |
| Hemigalus derbyanus MH464791 1         | Canis lupus chanco NC010340 4         | 0,17827436 |
| Leptonychotes weddellii NC008424 1     | Cuon alpinus NC013445 3               | 0,17827773 |
| Leptailurus serval NC028316 1          | Canis lupus chanco NC010340 4         | 0,17827998 |
| Mustela erminea T305 2                 | Civettictis civetta NC033378 1        | 0,17828105 |
| Arctodus simus NC011116 1              | Arctocepalus townsendi NC008420 1     | 0,17830014 |
| Prionailurus viverrinus NC028305 1     | Meles meles T303 3                    | 0,17830066 |
| Mustela kathiah NC023210 1             | Leopardus pardalis NC028315 1         | 0,17830136 |
| Mustela frenata NC020640 1             | Felis chaus NC028307 1                | 0,17830183 |
| Otocolobus manu NC028323 1             | Mustela frenata NC020640 1            | 0,17830189 |
| Martes melampus NC009678 1             | Lynx lynx NC027083 4                  | 0,17830192 |
| Mustela nigripes NC024942 1            | Lynx lynx NC027083 4                  | 0,17830222 |
| Helarctos malayanus NC009968 2         | Eumetopias jubatus NC004030 10        | 0,17830226 |
| Mustela nigripes NC024942 1            | Lynx pardinus NC028319 161            | 0,1783029  |
| Arctodus simus NC011116 1              | Leopardus wiedii NC028318 1           | 0,17830345 |
| Mustela sibirica AP017394 11           | Meles meles T303 3                    | 0,17830351 |
| Meles leucurus NC039173 4              | Catapuma badia NC028300 1             | 0,17830351 |
| Phoca fasciata NC008428 1              | Nyctereutes procyonoides NC013700 3   | 0,17830375 |
| Viverra tangalunga MH464792 1          | Prionailurus viverrinus NC028305 1    | 0,17830417 |
| Puma yagouaroundi NC028311 1           | Mustela nigripes NC024942 1           | 0,17830423 |
| Paradoxurus jerdoni MH464793 1         | Mustela erminea T305 2                | 0,17830451 |
| Mustela erminea T305 2                 | Felis silvestris lybica KP202275 4    | 0,17830525 |
| Mustela sibirica NC020637 6            | Arctodus simus NC011116 1             | 0,17830551 |
| Mustela frenata NC020640 1             | Leopardus guigna NC028321 1           | 0,17830573 |
| Phoca largha NC008430 1                | Ursa brachyura KY117547 1             | 0,17830607 |
| Monachus monachus NC044972 5           | Canis mesomelas KT448280 1            | 0,17830725 |
| Prionodon pardicolor NC024569 2        | Erigathus barbatus NC008426 1         | 0,17830935 |
| Mustela nivalis T306 5                 | Leopardus pardalis T262 1             | 0,17831308 |
| Galidictis vittata T412 1              | Bassaricyon neblina SRX1097850 1      | 0,17831339 |
| Phoca fasciata NC008428 1              | Panthera tigris NC010642 35           | 0,17831975 |
| Martes foina NC020643 1                | Leopardus geoffroyi NC028320 1        | 0,17832023 |
| Ursus thibetanus thibetanus NC011118 4 | Mustela sibirica NC020637 6           | 0,17832023 |
| Cystophora cristata NC008427 1         | Canis lupus familiaris NC002008 1231  | 0,17832567 |
| Phoca vitulina NC001325 1              | Panthera tigris NC010642 35           | 0,17832713 |
| Halichoerus grypus NC001602 2          | Chrotogale owstoni T607 1             | 0,17833298 |
| Neovison vison NC020641 3              | Leopardus colocolo NC028314 1         | 0,17833446 |
| Ursus arctos isabellinus 1885 2        | Hemigalus derbyanus MH464791 1        | 0,17833516 |
| Mustela putorius NC020638 4            | Homotherium latidens MF871702 3       | 0,17833532 |
| Panthera onca KP202264 2               | Monachus monachus NC044972 5          | 0,17833656 |
| Halichoerus grypus NC001602 2          | Canis latrans NC008093 7              | 0,17834374 |
| Spilogale putorius NC010497 1          | Procyon lotor AB462049 4              | 0,17835018 |
| Lobodon carcinophaga NC008423 1        | Cynogale bennetti KY117544 1          | 0,17835753 |
| Bassariscus sumichrasti SRX1099089 1   | Arctocepalus townsendi NC008420 1     | 0,17835921 |
| Mirounga leonina NC008422 1            | Xenogale naso C07XAR110 1             | 0,17835982 |
| Pusa sibirica NC008432 2               | Ursa javanica T413 1                  | 0,17835982 |
| Mustela frenata NC020640 1             | Canis latrans NC008093 7              | 0,17836246 |
| Lynx lynx NC027083 4                   | Arctonyx collaris NC020645 1          | 0,17836647 |
| Lynx pardinus NC028319 161             | Lutra lutra LC050126 1                | 0,17836708 |
| Phoca fasciata NC008428 1              | Canis aureus KT448274 1               | 0,17836782 |
| Paradoxurus hermaproditus NLNC 1       | Cystophora cristata NC008427 1        | 0,17836863 |
| Paguma larvata PDD511 2                | Cystophora cristata NC008427 1        | 0,17836866 |
| Suricata suricatta SSM10 1             | Pusa hispida NC 008433 1              | 0,17836919 |
| Phoca groenlandica NC008429 54         | Canis latrans NC008093 7              | 0,17837015 |
| Martes americana NC020642 1            | Lynx lynx NC027083 4                  | 0,17837179 |
| Taxidea taxus NC020646 1               | Otocolobus manu NC028323 1            | 0,17837217 |
| Lutra sumatrana NC035810 1             | Arctodus simus NC011116 1             | 0,17837237 |
| Ursus thibetanus laniger MH281753 2    | Eumetopias jubatus NC004030 10        | 0,17837393 |
| Viverra tangalunga MH464792 1          | Prionailurus bengalensis CKM45 20     | 0,17837512 |
| Melogale moschata NC020644 1           | Arctodus simus NC011116 1             | 0,17837553 |
| Mustela erminea T305 2                 | Arctocepalus forsteri NC004023 28     | 0,17837788 |
| Homotherium latidens MF871702 3        | Conepatus chinga NC042596 1           | 0,17838512 |
| Phoca vitulina NC001325 1              | Panthera uncia NC010638 1             | 0,17838596 |
| Ursus spelaeus NC011112 8              | Meles leucurus NC039173 4             | 0,17838678 |
| Prionailurus bengalensis NC028301 12   | Ictonyx striatus T299 1               | 0,17838691 |
| Ursus spelaeus EU327344 13             | Meles meles T303 3                    | 0,17838743 |
| Potos flavus T414 1                    | Genetta abyssinica MG489822 1         | 0,17838795 |
| Phoca vitulina NC001325 1              | Mephitis mephitis NC020648 1          | 0,1783902  |

|                                       |                                      |            |
|---------------------------------------|--------------------------------------|------------|
| Eupleres goudotii D128 1              | Bassaricyon neblina SRX1097850 1     | 0,19142163 |
| Vulpes vulpes NC008434 5              | Arctocepalus forsteri KT693377 17    | 0,19142213 |
| Ursus cinereoargenteus NC026723 2     | Martes americana NC020642 1          | 0,19142327 |
| Mungotictis decemlineata NC027828 1   | Bassaricyon neblina SRX1097850 1     | 0,19142379 |
| Mustela altaica NC021751 1            | Cynogale bennetti KY117544 1         | 0,1914261  |
| Ursus cinereoargenteus NC026723 2     | Mungotictis decemlineata NC027828 1  | 0,19142617 |
| Urocyon littoralis catalinae KP129018 | Mustela erminea T305 2               | 0,19142942 |
| Ursus corsac NC023958 1               | Panthera uncia NC010638 1            | 0,1914351  |
| Tremarctos ornatus NC009969 2         | Otocyon megalotis SAF 1 2            | 0,19143642 |
| Neophoca cinerea NC008419 1           | Lycaon pictus NC028427 2             | 0,19143802 |
| Nasua nasua NC020647 1                | Canis adustus KT448271 1             | 0,19144106 |
| Poecilogale albinucha T602 1          | Panthera uncia NC010638 1            | 0,19144438 |
| Bdeogale nigripes GLC15 1             | Ailuropoda melanoleuca NC009492 5    | 0,19144401 |
| Ursus arctos GU573486 5               | Galidictis fasciata DM333 1          | 0,19144438 |
| Crossarchus platycephalus C7R66 1     | Ailuropoda melanoleuca NC009492 5    | 0,19144453 |
| Ursus arctos GU573486 5               | Canis anthus NC027956 2              | 0,19144456 |
| Vulpes ferrillata NC027935 1          | Ursus spelaeus EU327344 13           | 0,19144571 |
| Ursus arctos isabellinus 1885 2       | Pardofelis marmorata NLN3 2          | 0,19144692 |
| Ursus maritimus GU573488 Svalbard     | Panthera uncia NC010638 1            | 0,19144699 |
| Ursus thibetanus thibetanus NC011118  | Suricata suricatta SSM10 1           | 0,19144861 |
| Ursus arctos GU573491 207             | Otocolobus manu NC028323 1           | 0,19144915 |
| Otocyon megalotis SAF 1 2             | Ictonyx striatus T299 1              | 0,19145206 |
| Ursus thibetanus mupinensis NC00875   | Proteles cristata T393 6             | 0,19145358 |
| Panthera leo spelaea KX258452 2       | Martes foina NC020643 1              | 0,191459   |
| Conepatus chinga NC042596 1           | Canis lupus chanco NC010340 4        | 0,19145906 |
| Eumetopias jubatus NC004030 10        | Cuon alpinus NC013445 3              | 0,1914597  |
| Ursa javanica/auropunctata NC006835   | Conepatus chinga NC042596 1          | 0,1914645  |
| Proteles cristata T393 6              | Helarctos malayanus NC009968 2       | 0,1914648  |
| Vulpes vulpes NC008434 5              | Arctocepalus forsteri NC004023 28    | 0,19146736 |
| Ursus americanus JX196366 3           | Prionodon linsang ERR2391707 1       | 0,19146822 |
| Neofelis nebulosa NC008450 3          | Martes americana NC020642 1          | 0,1914698  |
| Panthera leo NERO 19                  | Arctocepalus forsteri KT693377 17    | 0,19147094 |
| Lutrogale perspicillata NC035811 1    | Canis adustus KT448271 1             | 0,19147111 |
| Panthera uncia NC010638 1             | Gulo gulo NC009638 3                 | 0,19148004 |
| Neofelis nebulosa NC008450 3          | Martes martes T302 3                 | 0,1914801  |
| Procyon lotor AB462049 4              | Panthera pardus NC010641 5           | 0,19148295 |
| Cynictis penicillata T375 1           | Bassaricyon neblina SRX1097850 1     | 0,19149145 |
| Nyctereutes procyonoides NC013700 3   | Aonyx cinerea NC035814 2             | 0,1914929  |
| Galidia elegans D146 1                | Canis anthus NC027956 2              | 0,19149318 |
| Ursus thibetanus laniger MH281753 2   | Neofelis nebulosa NC008450 3         | 0,19149399 |
| Urocyon littoralis catalinae KP129018 | Mustela eversmanni NC028013 1        | 0,19149549 |
| Otocyon megalotis SAF 1 2             | Mungos mungo/gambianus SRR77048      | 0,19149818 |
| Lutra sumatrana NC035810 1            | Diplogale hosei MH464790 1           | 0,19149932 |
| Vulpes corsac NC023958 1              | Martes pennanti NC020664 16          | 0,19149964 |
| Ursus arctos prunosus MG066703 3      | Canis mesomelas KT448280 1           | 0,19150065 |
| Ursus arctos GU573491 207             | Xenogale naso C07XAR110 1            | 0,19150148 |
| Ursus maritimus GU573488 Svalbard     | Cynictis penicillata T375 1          | 0,19150165 |
| Procyon lotor AB462049 4              | Hyaena hyaena NC020669 1             | 0,19150189 |
| Nasua nasua NC020647 1                | Arctodus simus NC011116 1            | 0,19150305 |
| Urocyon littoralis catalinae KP129018 | Callorhinus ursinus NC008415 1       | 0,19150315 |
| Panthera uncia KP202269 1             | Arctocepalus gazella BK010918 1      | 0,19150427 |
| Ursus arctos EU497665 29              | Lontra canadensis SRR10409165 1      | 0,19150551 |
| Parahyaena brunnea NC038159 15        | Arctocepalus townsendi NC008420 1    | 0,19150655 |
| Cynogale bennetti KY117544 1          | Chrysoyon brachyurus NC024172 1      | 0,19150709 |
| Canis aureus KT448274 1               | Arctocepalus forsteri NC004023 28    | 0,19150738 |
| Nasua nasua NC020647 1                | Felis silvestris lybica KP202275 4   | 0,19150785 |
| Meles meles T303 3                    | Crocota crocota NC020670 3           | 0,19150913 |
| Ursus thibetanus formosanus NC00993   | Eupleres goudotii D128 1             | 0,19150963 |
| Ursus americanus JX196366 3           | Cuon alpinus NC013445 3              | 0,19151235 |
| Ursus arctos GU573491 207             | Prionodon pardicolor NC024569 2      | 0,1915134  |
| Melursus ursinus NC009970 2           | Attilax paludinosus T606 1           | 0,19151363 |
| Canis lupus chanco NC010340 4         | Arctocepalus gazella BK010918 1      | 0,19151495 |
| Ursus thibetanus thibetanus NC011118  | Ursa brachyura KY117547 1            | 0,19151564 |
| Cynogale bennetti KY117544 1          | Canis mesomelas KT448280 1           | 0,19151844 |
| Panthera tigris NC010642 35           | Mustela nivalis T306 5               | 0,19152027 |
| Procyon lotor AB462049 4              | Panthera leo spelaea KX258452 2      | 0,1915227  |
| Canis lupus familiaris NC002008 1231  | Arctocepalus forsteri KT693377 17    | 0,19152465 |
| Odobenus rosmarus NC004029 29         | Lynx lynx NC027083 4                 | 0,19152768 |
| Neofelis nebulosa NC008450 3          | Meles anakuma NC009677 1             | 0,19153632 |
| Panthera leo NERO 19                  | Lutrogale perspicillata NC035811 1   | 0,19153699 |
| Ursus spelaeus EU327344 13            | Chrysoyon brachyurus NC024172 1      | 0,1915406  |
| Spilogale putorius NC010497 1         | Urocyon littoralis NC028317 1        | 0,19154269 |
| Xenogale naso C07XAR110 1             | Conepatus chinga NC042596 1          | 0,19154528 |
| Spilogale putorius NC010497 1         | Bassaricyon neblina SRX1097850 1     | 0,19154905 |
| Ursus arctos AP012576 6               | Odobenus rosmarus NC004029 29        | 0,19154914 |
| Genetta genetta T297 1                | Cuon alpinus NC013445 3              | 0,19155115 |
| Panthera onca KP202264 2              | Arctocepalus forsteri NC004023 28    | 0,19155131 |
| Panthera leo NERO 19                  | Ailuropoda melanoleuca NC009492 5    | 0,19155364 |
| Urocyon cinereoargenteus NC026723 2   | Melogale moschata KP726273 1         | 0,19155879 |
| Vulpes lagopus NC026529 3             | Meles anakuma NC009677 1             | 0,19156027 |
| Urocyon littoralis catalinae KP129018 | Mungotictis decemlineata NC027828 1  | 0,19156076 |
| Vulpes corsac NC023958 1              | Bassariscus sumichrasti SRX1099089 1 | 0,19156373 |
| Panthera onca KP202264 2              | Tapirus terrestris T358              | 0,19156376 |
| Panthera uncia NC010638 1             | Ailuurus fulgens NC011124 1          | 0,19156495 |
| Ursus maritimus GU573488 Svalbard     | Prionodon linsang ERR2391707 1       | 0,19156829 |
| Ursus maritimus GU573488 Svalbard     | Mungos mungo MMC7 1                  | 0,1915689  |
| Ursus arctos isabellinus 1885 2       | Ursa javanica T413 1                 | 0,19156902 |
| Vulpes corsac NC023958 1              | Martes foina NC020643 1              | 0,19157052 |
| Hyaena hyaena NC020669 1              | Arctotherium sp NC030174 1           | 0,19157371 |
| Urocyon littoralis catalinae KP129018 | Otocolobus manu NC028323 1           | 0,19157408 |
| Ursus arctos GU573486 5               | Cynictis penicillata T375 1          | 0,19157518 |
| Profelis aurata NC028299 1            | Lutrogale perspicillata NC035811 1   | 0,19157735 |
| Arctocepalus forsteri KT693377 17     | Arctictis binturong T605 2           | 0,19157746 |
| Vulpes zerdia KJ603240 1              | Panthera tigris amoyensis NC014770 2 | 0,19157852 |
| Ursus arctos prunosus MG066703 3      | Galidia elegans D146 1               | 0,19157854 |
| Vulpes lagopus NC026529 3             | Ursus thibetanus thibetanus NC011118 | 0,19158015 |
| Ursus maritimus NC003428 31           | Galerella sanguinea T378 1           | 0,19158065 |
| Ursus arctos EU497665 29              | Galerella sanguinea T378 1           | 0,19158074 |
| Ursus spelaeus NC011112 8             | Nyctereutes procyonoides NC013700 3  | 0,19158426 |
| Poecilogale albinucha T602 1          | Panthera tigris amoyensis NC014770 2 | 0,19158514 |
| Ursus arctos EU497665 29              | Lycaon pictus NC028427 2             | 0,19158599 |
| Neophoca cinerea NC008419 1           | Mephitis mephitis NC020648 1         | 0,19159061 |
| Panthera uncia NC010638 1             | Helarctos malayanus NC009968 2       | 0,19159377 |

|                                          |                                       |            |
|------------------------------------------|---------------------------------------|------------|
| Melogale moschata KP726273 1             | Leopardus colocolo NC028314 1         | 0,17839059 |
| Mustela erminea T305 2                   | Helarctos malayanus NC009668 2        | 0,17839143 |
| Mustela nigripes NC024942 1              | Canis adustus KT448271 1              | 0,17839241 |
| Monachus monachus NC004972 5             | Eupleres goodotii D128 1              | 0,17839678 |
| Martes foina NC020643 1                  | Eumetopias jubatus NC004030 10        | 0,17840049 |
| Spilogale putorius NC010497 1            | Pusa hispida NC 008433 1              | 0,17840184 |
| Ursus thibetanus laniger MH281753 2      | Neovison vison NC020641 3             | 0,17840485 |
| Martes flavigula NC012141 3              | Lynx pardinus NC028319 161            | 0,17841551 |
| Viverricula indica KX891751 1            | Canis mesomelas KT448280 1            | 0,17841826 |
| Mustela nigripes NC024942 1              | Callorhinus ursinus NC008415 1        | 0,17842154 |
| Lutra lutra NC011358 9                   | Arctocepalus pusillus NC008417 1      | 0,17842197 |
| Taxidea taxus NC020646 1                 | Arctotherium sp NC030174 1            | 0,17842831 |
| Nasua nasua NC020647 1                   | Martes martes T302 3                  | 0,17843062 |
| Puma yagouaroundi NC028311 1             | Meles meles T303 3                    | 0,17843507 |
| Viverricula indica KX891751 1            | Meles leucurus NC039173 4             | 0,17843534 |
| Ursus maritimus GU573488 Svalbard        | Potos flavus T414 1                   | 0,17843713 |
| Melogale moschata KP726273 1             | Arctodus simus NC011116 1             | 0,17843722 |
| Phoca groenlandica NC008429 54           | Ursa semitorquata MH464789 1          | 0,17843723 |
| Martes melampus NC009678 1               | Leopardus pardalis T262 1             | 0,17843729 |
| Paradoxurus hermaphroditus NLNC 1        | Mustela kathiah NC023210 1            | 0,17843829 |
| Prionailurus bengalensis NC028301 12     | Mustela nigripes NC024942 1           | 0,17843895 |
| Phoca fasciata NC008428 1                | Cryptocitrus ferox FC13 1             | 0,17843916 |
| Phoca groenlandica NC008429 54           | Paradoxurus jerdoni MH464793 1        | 0,17843916 |
| Zalophus wolfebaeki SRR4431565 1         | Meles meles T303 3                    | 0,17843929 |
| Mirounga angustirostris SRR10331586 1    | Helogale parvula SRR7637809 1         | 0,17843978 |
| Ommatophoca rossii AY377287etc 1         | Melogale moschata V0735A 1            | 0,17843989 |
| Viverra zibetha T609 1                   | Mustela altaica NC021751 1            | 0,17844293 |
| Pusa caspica NC008431 1                  | Parahyaena brunnea NC038159 15        | 0,1784437  |
| Ursus arctos GU573486 5                  | Potos flavus T414 1                   | 0,17844385 |
| Ursus thibetanus formosanus NC009331 1   | Taxidea taxus NC020646 1              | 0,17844553 |
| Martes martes T302 3                     | Lynx lynx NC027083 4                  | 0,17844559 |
| Zalophus wolfebaeki SRR4431565 1         | Martes martes T302 3                  | 0,17844737 |
| Potos flavus T414 1                      | Hemigale derbyanus MH464791 1         | 0,17844847 |
| Monachus schainislandi NC008421 1        | Catopuma temminckii NC027115 41       | 0,17844883 |
| Ursus thibetanus laniger MH281753 2      | Meles leucurus NC039173 4             | 0,17845316 |
| Monachus monachus NC004972 5             | Cynogale bennetti KY117544 2          | 0,17845403 |
| Phoca largha NC008430 1                  | Mephitis mephitis NC020648 1          | 0,17845729 |
| Ursus thibetanus thibetanus NC011118 4   | Mustela nigripes NC024942 1           | 0,17845795 |
| Phoca fasciata NC008428 1                | Canis lupus familiaris NC002008 1231  | 0,17846877 |
| Martes flavigula NC012141 3              | Arctocepalus forsteri KT693377 17     | 0,17847234 |
| Monachus schainislandi NC008421 1        | Canis lupus chanco NC010340 4         | 0,17847548 |
| Procyon lotor AB462046 3                 | Eumetopias jubatus NC004030 10        | 0,17847939 |
| Conepatus chinga NC024596 1              | Arctonyx collaris NC020645 1          | 0,17848226 |
| Arctonyx collaris NC020645 1             | Arctocepalus townsendi NC008420 1     | 0,17848818 |
| Ommatophoca rossii AY377287etc 1         | Mungos mungo/gambianus SRR7704821 1   | 0,17849135 |
| Procyon lotor AB462046 3                 | Conepatus chinga NC024596 1           | 0,17849153 |
| Martes zibellina NC011579 39             | Arctocepalus townsendi NC008420 1     | 0,17849246 |
| Mustela erminea T305 2                   | Arctocepalus australis MG023139 1     | 0,17849305 |
| Urocyon cinereoargenteus NC026723 21     | Leptonyctes weddellii NC008424 1      | 0,17849599 |
| Procyon lotor AB462049 4                 | Homotherium latidens MF871702 3       | 0,17850053 |
| Pusa hispida NC 008433 1                 | Lycalopex sechurae KT448284 1         | 0,17850114 |
| Ursus thibetanus mupinensis NC008753 2   | Taxidea taxus NC020646 1              | 0,17850251 |
| Mustela nigripes NC024942 1              | Lynx canadensis NC028313 1            | 0,17850438 |
| Pusa hispida NC 008433 1                 | Ursa javanica T413 1                  | 0,17850439 |
| Mustela erminea T305 2                   | Felis nigripes NC028309 1             | 0,17850748 |
| Neovison vison NC020641 3                | Arctocepalus forsteri NC004023 28     | 0,17851304 |
| Bassariscus sumichrasti SRX1099089 1     | Arctocepalus forsteri NC004023 28     | 0,1785132  |
| Phoca fasciata NC008428 1                | Panthera uncia KP202269 1             | 0,17851353 |
| Ursus maritimus NC003428 31              | Mustela erminea T305 2                | 0,17851377 |
| Pusa hispida NC 008433 1                 | Lycyon pictus NC028427 2              | 0,17851496 |
| Pusa caspica NC008431 1                  | Ursus arctos NC020646 1               | 0,17851533 |
| Prionailurus bengalensis NC028301 12     | Martes martes T302 3                  | 0,17851582 |
| Panthera leo spelaea KX258452 2          | Cystophora cristata NC008427 1        | 0,17851853 |
| Zalophus californianus NC008416 1        | Ailurus fulgens styani NC009691 1     | 0,17852119 |
| Ursus thibetanus formosanus NC009331 1   | Mustela nigripes NC024942 1           | 0,17852262 |
| Prionailurus bengalensis CKM45 20        | Martes martes T302 3                  | 0,17852451 |
| Pusa hispida NC 008433 1                 | Canis lupus familiaris NC002008 1231  | 0,17852908 |
| Monachus monachus NC004972 5             | Attilax paludinosus T606 1            | 0,17853148 |
| Vulpes vulpes NC008434 5                 | Monachus monachus NC004972 5          | 0,17853183 |
| Mephitis mephitis NC020648 1             | Bassariscus sumichrasti SRX1099089 1  | 0,17853267 |
| Pusa caspica NC008431 1                  | Canis lupus chanco NC010340 4         | 0,17853579 |
| Vulpes vulpes NC008434 5                 | Civettictis civetta NC033378 1        | 0,17853783 |
| Viverra tangalunga MH464792 1            | Spilogale putorius NC010497 1         | 0,17853994 |
| Ursus spelaeus NC011112 8                | Neovison vison NC020641 3             | 0,17853989 |
| Mustela frenata NC020640 1               | Civettictis civetta NC033378 1        | 0,17854033 |
| Martes flavigula NC012141 3              | Arctocepalus pusillus NC008417 1      | 0,1785406  |
| Panthera onca NC022842 1                 | Monachus monachus NC004972 5          | 0,17855054 |
| Crossarchus platycephalus C7R66 1        | Canis adustus KT448271 1              | 0,17855853 |
| Meles leucurus NC039173 4                | Conepatus chinga NC024596 1           | 0,17855993 |
| Nandinia binotata NC024567 1             | Ailurus fulgens styani NC009691 1     | 0,17856258 |
| Urocyon littoralis catalinae KP129018 15 | Leptonyctes weddellii NC008424 1      | 0,17856327 |
| Vulpes ferrilata NC027935 1              | Leptonyctes weddellii NC008424 1      | 0,17856367 |
| Martes pennanti NC020664 16              | Arctodus simus NC011116 1             | 0,17856859 |
| Ommatophoca rossii AY377287etc 1         | Chrotogale owstoni T607 1             | 0,1785699  |
| Otocyon megalotis SAF1 2                 | Cystophora cristata NC008427 1        | 0,17857113 |
| Prionailurus bengalensis NC028301 12     | Martes melampus NC009678 1            | 0,17857149 |
| Mustela frenata NC020640 1               | Felis nigripes NC028309 1             | 0,17857152 |
| Ursus americanus JX196366 3              | Ommatophoca rossii AY377287etc 1      | 0,17857191 |
| Prionailurus planiceps NC028312 6        | Mustela kathiah NC023210 1            | 0,17857201 |
| Prionailurus planiceps KY682741 4        | Mustela kathiah NC023210 1            | 0,17857213 |
| Mustela putorius NC020638 4              | Leopardus pardalis NC028315 1         | 0,17857231 |
| Meles leucurus NC039173 4                | Leopardus geoffroyi NC028320 1        | 0,17857262 |
| Ursus maritimus NC003428 31              | Ommatophoca rossii AY377287etc 1      | 0,1785745  |
| Martes foina NC020643 1                  | Arctocepalus pusillus NC008417 1      | 0,17857605 |
| Zalophus wolfebaeki SRR4431565 1         | Martes zibellina NC011579 39          | 0,17857707 |
| Parahyaena brunnea NC038159 15           | Mirounga leonina NC008422 1           | 0,17857768 |
| Arctodus simus NC011116 1                | Ailurus fulgens styani NC009691 1     | 0,17857789 |
| Ursus spelaeus NC011112 8                | Homotherium latidens MF871702 3       | 0,17857812 |
| Phoca vitulina NC001325 1                | Paguma larvata PDD511 2               | 0,17858244 |
| Leopardus pardalis T262 1                | Bassariscus sumichrasti SRX1099089 1  | 0,17858294 |
| Ursus arctos AP012576 6                  | Potos flavus T414 1                   | 0,17858294 |
| Pardofelis marmorata NLN3 2              | Mirounga angustirostris SRR10331586 1 | 0,17858346 |
| Leopardus pardalis NC028315 1            | Arctodus simus NC011116 1             | 0,17858432 |

|                                       |                                      |            |
|---------------------------------------|--------------------------------------|------------|
| Odobenus rosmarus NC004029 29         | Lynx canadensis NC028313 1           | 0,19159469 |
| Ursa javanica/auropunctata NC006835   | Ailurus fulgens NC011124 1           | 0,19159479 |
| Ursus arctos AP012576 6               | Parahyaena brunnea NC038159 15       | 0,19159774 |
| Ursus spelaeus NC011112 8             | Panthera tigris amoyensis NC014770 2 | 0,19160162 |
| Ursus thibetanus mupinensis NC008753  | Odobenus rosmarus NC004029 29        | 0,19160222 |
| Panthera onca NC022842 1              | Melurus ursinus NC009970 2           | 0,19160584 |
| Zalophus wolfebaeki SRR4431565 1      | Canis lupus familiaris NC002008 1231 | 0,19160832 |
| Ursus americanus JX196366 3           | Otocyon megalotis SAF1 2             | 0,19161014 |
| Panthera pardus NC010641 5            | Martes zibellina NC011579 39         | 0,19161418 |
| Spilogale putorius NC010497 1         | Prionodon pardicolor NC024569 2      | 0,19161777 |
| Procyon lotor AB462049 4              | Mellivora capensis T370 1            | 0,19162039 |
| Phocartos hookeri NC008418 1          | Xenogale naso C07XAR110 1            | 0,19162463 |
| Vulpes lagopus NC026529 3             | Mungos mungo/gambianus SRR77048      | 0,19162512 |
| Urocyon littoralis catalinae KP129018 | Martes americana NC020642 1          | 0,19162525 |
| Panthera tigris amoyensis NC014770 2  | Arctocepalus forsteri NC004023 28    | 0,19162612 |
| Paradoxurus hermaphroditus NC03959    | Martes melampus NC009678 1           | 0,19162677 |
| Lutrogale perspicillata NC035811 1    | Attilax paludinosus T606 1           | 0,19162707 |
| Mungotictis decemlineata NC027828     | Arctocepalus townsendi NC008420 1    | 0,19162764 |
| Suricata suricatta SSM10 1            | Lycalopex sechurae KT448284 1        | 0,19162835 |
| Pardofelis marmorata NLN3 2           | Conepatus chinga NC024596 1          | 0,19162853 |
| Vulpes corsac NC023958 1              | Arctocepalus pusillus NC008417 1     | 0,19163011 |
| Tremarctos ornatus NC009969 2         | Diplogale hosei MH464790 1           | 0,19163318 |
| Vulpes corsac NC023958 1              | Ursus arctos EU497665 29             | 0,19163448 |
| Melogale moschata V0735A 1            | Ichneumia albicauda T603 1           | 0,19163485 |
| Ursus maritimus NC003428 31           | Prionodon pardicolor ERR2391707 1    | 0,19163567 |
| Vulpes lagopus NC026529 3             | Ursus thibetanus mupinensis NC008753 | 0,19163595 |
| Ursus arctos isabellinus 1885 2       | Bdeogale nigripes GLC15 1            | 0,19163623 |
| Gallidia elegans D146 1               | Arctotherium sp NC030174 1           | 0,19163646 |
| Speothos venaticus C48 2              | Mungos mungo/gambianus SRR77048      | 0,19163752 |
| Panthera pardus japonensis KJ866876   | Arctocepalus gazella BK010918 1      | 0,19163883 |
| Panthera uncia KP202269 1             | Lutrogale perspicillata NC035811 1   | 0,19164223 |
| Ursus arctos GU573486 5               | Xenogale naso C07XAR110 1            | 0,19164255 |
| Prionailurus rubiginosus NC028304 2   | Nasua nasua NC020647 1               | 0,19164361 |
| Ursus arctos pruinosus MG066703 3     | Galidictis fasciata DM333 1          | 0,19164641 |
| Profelis aurata NC028299 1            | Otocyon megalotis SAF1 2             | 0,19164695 |
| Spilogale putorius NC010497 1         | Arctocepalus forsteri NC004023 28    | 0,19164801 |
| Vulpes lagopus NC026529 3             | Mephitis mephitis NC020648 1         | 0,19164936 |
| Prionailurus bengalensis CKM45 20     | Bassariscus neblina SRX1097850 1     | 0,19164979 |
| Ursus arctos pruinosus MG066703 3     | Otocolobus manul NC028323 1          | 0,19165152 |
| Ursus arctos AP012576 6               | Xenogale naso C07XAR110 1            | 0,19165273 |
| Panthera leo spelaea KX258452 2       | Lontra canadensis SRR10409165 1      | 0,19165319 |
| Panthera leo spelaea KX258452 2       | Neophoca cinerea NC008419 1          | 0,1916571  |
| Zalophus wolfebaeki SRR4431565 1      | Canis mesomelas KT448280 1           | 0,1916604  |
| Parahyaena brunnea NC038159 15        | Canis lupus chanco NC010340 4        | 0,19167028 |
| Spilogale putorius NC010497 1         | Felis margarita NC028308 1           | 0,19167799 |
| Mustela frenata NC020640 1            | Tapirus terrestris T358              | 0,19167891 |
| Spilogale putorius NC010497 1         | Puma yagouaroundi NC028311 1         | 0,19167921 |
| Galerella sanguinea T378 1            | Conepatus chinga NC024596 1          | 0,19168073 |
| Otocyon megalotis SAF1 2              | Arctocepalus forsteri NC004023 28    | 0,19168341 |
| Suricata suricatta SSM10 1            | Melogale moschata V0735A 1           | 0,19168839 |
| Suricata suricatta SSM10 1            | Lontra canadensis SRR10409165 1      | 0,19168903 |
| Vulpes vulpes NC008434 5              | Arctocepalus australis MG023139 1    | 0,19169147 |
| Galictis vittata T412 1               | Canis lupus chanco NC010340 4        | 0,1916918  |
| Canis anthus NC027956 2               | Aonyx cinerea NC035814 2             | 0,19169459 |
| Ursus spelaeus EU327344 13            | Cuon alpinus NC013445 3              | 0,19169475 |
| Paradoxurus hermaphroditus NC03959    | Lutra sumatrana NC035810 1           | 0,19169602 |
| Urocyon cinereoargenteus NC026723 21  | Mustela eversmanni NC028013 1        | 0,19169742 |
| Urocyon cinereoargenteus NC026723 21  | Meles anakuma NC009677 1             | 0,19169743 |
| Prionodon pardicolor ERR2391707 1     | Arctotherium sp NC030174 1           | 0,19169895 |
| Paradoxurus hermaphroditus NLNC 1     | Martes zibellina NC011579 39         | 0,19169962 |
| Otocyon megalotis SAF1 2              | Eupleres goodotii D128 1             | 0,19170015 |
| Hyena hyena NC020669 1                | Ailurus fulgens styani NC009691 1    | 0,19170333 |
| Otocyon megalotis SAF1 2              | Meles anakuma NC009677 1             | 0,19170387 |
| Phocartos hookeri NC008418 1          | Paradoxurus hermaphroditus NC03959   | 0,19170481 |
| Panthera uncia NC010638 1             | Nyctereutes procyonoides NC013700 3  | 0,19170603 |
| Ursus thibetanus mupinensis NC008753  | Nyctereutes procyonoides NC013700 3  | 0,19170693 |
| Ursus arctos pruinosus MG066703 3     | Xenogale naso C07XAR110 1            | 0,19171017 |
| Proteles cristata T393 6              | Mustela eversmanni NC028013 1        | 0,19171186 |
| Crocuta crocuta NC020670 3            | Arctocepalus australis MG023139 1    | 0,19171208 |
| Arctocepalus gazella BK010918 1       | Arctictis binturong T605 2           | 0,19171332 |
| Galictis vittata T412 1               | Eupleres goodotii D128 1             | 0,19171518 |
| Ursus thibetanus formosanus NC009331  | Suricata suricatta SSM10 1           | 0,19171552 |
| Canis lupus chanco NC010340 4         | Arctocepalus forsteri KT693377 17    | 0,19171575 |
| Ursus thibetanus formosanus NC009331  | Nasua nasua NC020647 1               | 0,19171771 |
| Ursus spelaeus EU327344 13            | Nyctereutes procyonoides NC013700 3  | 0,19171903 |
| Proteles cristata T393 6              | Arctotherium sp NC030174 1           | 0,1917204  |
| Ursus arctos GU573491 207             | Lycyon pictus NC028427 2             | 0,19172078 |
| Melurus ursinus NC009970 2            | Cryptocitrus ferox FC13 1            | 0,19172366 |
| Ursus arctos GU573486 5               | Lycyon pictus NC028427 2             | 0,19172724 |
| Ursus arctos isabellinus 1885 2       | Chrysocyon brachyurus NC024172 1     | 0,19172846 |
| Panthera pardus japonensis KJ866876   | Galictis vittata T412 1              | 0,19172965 |
| Neofelis nebulosa NC008450 3          | Lutra lutra NC011358 9               | 0,19173455 |
| Lontra canadensis SRR10409165 1       | Ursa javanica/auropunctata NC006835  | 0,19173495 |
| Speothos venaticus C48 2              | Diplogale hosei MH464790 1           | 0,19173524 |
| Zalophus californianus NC008416 1     | Prionodon pardicolor NC024569 2      | 0,19173783 |
| Ursus spelaeus NC011112 8             | Panthera leo spelaea KX258452 2      | 0,19173832 |
| Panthera pardus NC010641 5            | Tapirus terrestris T358              | 0,19174051 |
| Cuon alpinus NC013445 3               | Arctocepalus gazella BK010918 1      | 0,19174276 |
| Neophoca cinerea NC008419 1           | Canis aureus KT448274 1              | 0,19174331 |
| Zalophus californianus NC008416 1     | Proteles cristata T393 6             | 0,19174444 |
| Panthera pardus NC010641 5            | Arctocepalus gazella BK010918 1      | 0,19174558 |
| Meles meles T303 3                    | Tapirus terrestris T358              | 0,19174716 |
| Spilogale putorius NC010497 1         | Nyctereutes procyonoides NC013700 3  | 0,19174948 |
| Ursus arctos GU573491 207             | Panthera leo NERO 1                  | 0,19175148 |
| Panthera leo spelaea KX258452 2       | Eumetopias jubatus NC004030 10       | 0,19175385 |
| Vulpes corsac NC023958 1              | Mungos mungo/gambianus SRR77048      | 0,19175935 |
| Ursus thibetanus formosanus NC009331  | Neofelis nebulosa NC008450 3         | 0,19176155 |
| Urocyon cinereoargenteus NC026723 21  | Cuon alpinus NC013445 3              | 0,19176586 |
| Otocyon megalotis SAF1 2              | Callorhinus ursinus NC008415 1       | 0,19176784 |
| Vulpes lagopus NC026529 3             | Ursus arctos isabellinus 1885 2      | 0,19176865 |
| Otocyon megalotis SAF1 2              | Arctocepalus forsteri KT693377 17    | 0,19177037 |
| Ursus arctos EU497665 29              | Xenogale naso C07XAR110 1            | 0,19177094 |
| Paradoxurus jerdoni MH464793 1        | Aonyx cinerea NC035814 2             | 0,191774   |

|                                         |                                       |             |
|-----------------------------------------|---------------------------------------|-------------|
| Mirounga angustirostris SRR10331586 1   | Galerella sanguinea T378 1            | 0,1785848   |
| Viverricula indica KX891751 1           | Bassariscus sumichrasti SRX1099089 1  | 0,17858543  |
| Pusa caspica NC008431 1                 | Panthera onca NC022842 1              | 0,17858572  |
| Erignathus barbatus NC008426 1          | Arctictis binturong T605 2            | 0,17858654  |
| Zalophus californianus NC008416 1       | Aillurus fulgens NC011124 1           | 0,17858836  |
| Phoca groenlandica NC008429 54          | Arctictis binturong T605 2            | 0,17858905  |
| Ursus thibetanus laniger MH281753 2     | Mustela frenata NC020640 1            | 0,1785893   |
| Ursus thibetanus laniger MH281753 2     | Arctonyx collaris NC020645 1          | 0,17859104  |
| Ursus thibetanus thibetanus NC011118 4  | Mustela putorius NC020638 4           | 0,17859247  |
| Ursus thibetanus thibetanus NC011118 4  | Mustela itatsi NC034330 19            | 0,17859264  |
| Eumetopias jubatus NC004030 10          | Enhydra lutris NC009692 1             | 0,17859568  |
| Cystophora cristata NC008427 1          | Canis lupus chanco NC010340 4         | 0,17859824  |
| Urva javanica/auronpunctata NC006835 1  | Canis adustus KT448271 1              | 0,17860018  |
| Ursus thibetanus mupiniensis NC008753 2 | Hemigalus derbyanus MH464791 1        | 0,17860144  |
| Taxidea taxus NC020646 1                | Canis adustus KT448271 1              | 0,17860407  |
| Spilogale putorius NC010497 1           | Mustela sibirica AP017394 11          | 0,17860502  |
| Pusa sibirica NC008432 2                | Panthera pardus NC010641 5            | 0,17861234  |
| Mustela itatsi NC034330 19              | Callorhinus ursinus NC008415 1        | 0,17862344  |
| Otaria byronia OTAB 1                   | Martes melampus NC009678 1            | 0,17862645  |
| Pusa sibirica NC008432 2                | Xenogale naso CO7XAR110 1             | 0,17862915  |
| Martes zibellina NC011579 39            | Arctocepalus pusillus NC008417 1      | 0,17862947  |
| Meles meles T303 3                      | Arctocepalus pusillus NC008417 1      | 0,17862992  |
| Fossa fossana D350 1                    | Bassariscus sumichrasti SRX1099089 1  | 0,17863086  |
| Potos flavus T414 1                     | Fossa fossana D350 1                  | 0,17863092  |
| Mustela sibirica NC020637 6             | Canis adustus KT448271 1              | 0,17863244  |
| Lutra lutra LC050126 1                  | Leopardus pardalis T262 1             | 0,17863686  |
| Mustela sibirica AP017394 11            | Hemigalus derbyanus MH464791 1        | 0,17863709  |
| Otocyon megalotis SAF1 2                | Erignathus barbatus NC008426 1        | 0,17863786  |
| Prionailurus planiceps NC028312 6       | Mustela frenata NC020640 1            | 0,17863855  |
| Prionailurus rubiginosus NC028304 2     | Martes melampus NC009678 1            | 0,17863888  |
| Mustela sibirica NC020637 6             | Leopardus pardalis NC028315 1         | 0,17863968  |
| Taxidea taxus NC020646 1                | Leptailurus serval NC028316 1         | 0,17864054  |
| Mustela kathiah NC023210 1              | Civettictis civetta GLC19 1           | 0,17864075  |
| Prionailurus rubiginosus NC028304 2     | Mustela nigripes NC024942 1           | 0,17864081  |
| Ursus thibetanus thibetanus NC011118 4  | Eumetopias jubatus NC004030 10        | 0,17864086  |
| Paradoxurus hermaphroditus NLC 1        | Mustela erminea T305 2                | 0,17864136  |
| Cystophora cristata NC008427 1          | Canis aureus KT448274 1               | 0,17864233  |
| Zalophus wollebaeki SRR4431565 1        | Fossa fossana D350 1                  | 0,17864472  |
| Phoca fasciata NC008428 1               | Panthera pardus japonensis KJ866876 8 | 0,17864794  |
| Ursus thibetanus mupiniensis NC008753 2 | Mustela itatsi NC034330 19            | 0,17864837  |
| Civettictis civetta GLC19 1             | Bassariscus sumichrasti SRX1099089 1  | 0,17864865  |
| Neovison vison NC020641 3               | Lynx rufus NC014456 3                 | 0,17864992  |
| Zalophus wollebaeki SRR4431565 1        | Neovison vison NC020641 3             | 0,17865404  |
| Phoca largha NC008430 1                 | Panthera pardus japonensis KJ866876 8 | 0,17865536  |
| Ursus thibetanus formosanus NC009331 1  | Mustela itatsi NC034330 19            | 0,17865741  |
| Panthera tigris amoyensis NC014770 2    | Monachus schauinslandi NC008421 1     | 0,17866071  |
| Ursus thibetanus mupiniensis NC008753 2 | Neovison vison NC020641 3             | 0,17866375  |
| Ursus thibetanus thibetanus NC011118 4  | Mustela nivalis T306 5                | 0,17866439  |
| Mustela nigripes NC024942 1             | Canis lupus familiaris NC002008 1231  | 0,17866671  |
| Homotherium latidens MF871702 3         | Gulo gulo NC009685 3                  | 0,17868486  |
| Meles meles T303 3                      | Arctocepalus australis MG021331 1     | 0,17869005  |
| Procyon lotor AB462049 4                | Conepatus chinga NC042596 1           | 0,17869228  |
| Mustela frenata NC020640 1              | Crossarchus platycephalus C7R66 1     | 0,17869616  |
| Pusa caspica NC008431 1                 | Xenogale naso CO7XAR110 1             | 0,17869647  |
| Mustela frenata NC020640 1              | Urva semitorquata MH464789 1          | 0,17869653  |
| Mustela sibirica AP017394 11            | Canis adustus KT448271 1              | 0,17869702  |
| Pusa caspica NC008431 1                 | Canis aureus KT448274 1               | 0,17870106  |
| Meles anakuma NC009677 1                | Genetta servalina NC024568 2          | 0,17870443  |
| Mustela frenata NC020640 1              | Lynx rufus NC014456 3                 | 0,17870595  |
| Mustela kathiah NC023210 1              | Leopardus jacobita NC028322 1         | 0,17870604  |
| Vulpes corsac NC023958 1                | Civettictis civetta GLC19 1           | 0,17870651  |
| Paguma larvata PDD511 2                 | Mustela putorius NC020638 4           | 0,17870684  |
| Mustela sibirica NC020637 6             | Leopardus wiedii NC028318 1           | 0,17870757  |
| Melogale moschata KP726273 1            | Lynx canadensis NC028313 1            | 0,17870776  |
| Prionailurus rubiginosus NC028304 2     | Mustela sibirica NC020637 6           | 0,17870808  |
| Phoca fasciata NC008428 1               | Galidia elegans D146 1                | 0,17870839  |
| Pusa sibirica NC008432 2                | Panthera uncia NC010638 1             | 0,17870943  |
| Phoca largha NC008430 1                 | Xenogale naso CO7XAR110 1             | 0,17871055  |
| Mustela kathiah NC023210 1              | Leopardus geoffroyi NC028320 1        | 0,17871108  |
| Ommatophoca rossii AY377287etc 1        | Felis silvestris lybica KP202275 4    | 0,17871281  |
| Mirounga angustirostris SRR10331586 1   | Canis latrans NC008093 7              | 0,17871423  |
| Zalophus californianus NC008416 1       | Lutra lutra NC011358 9                | 0,17871875  |
| Zalophus californianus NC008416 1       | Lutra lutra LC050126 1                | 0,17871918  |
| Mustela itatsi NC034330 19              | Mephitis mephitis NC020648 1          | 0,17872004  |
| Cystophora cristata NC008427 1          | Arctocepalus pusillus NC028316 1      | 0,17872134  |
| Catopuma badia NC028300 1               | Arctodus simus NC011116 1             | 0,17872231  |
| Neovison vison NC020641 3               | Leopardus guigna NC028321 1           | 0,17872286  |
| Ursus thibetanus thibetanus NC011118 4  | Mustela sibirica AP017394 11          | 0,17872423  |
| Mustela erminea T305 2                  | Acinonyx jubatus NC005212 3           | 0,17872554  |
| Mustela nigripes NC024942 1             | Leopardus colocolo NC028314 1         | 0,17872579  |
| Ursus thibetanus thibetanus NC011118 4  | Arctonyx collaris NC020645 1          | 0,17872675  |
| Viverra tangalunga MH464792 1           | Genetta abysynica MG489822 1          | 0,17873085  |
| Phoca largha NC008430 1                 | Panthera tigris NC010642 35           | 0,17873113  |
| Phoca vitulina NC001325 1               | Panthera leo spelaea KX258452 2       | 0,17873399  |
| Puma concolor NC016470 22               | Canis adustus KT448271 1              | 0,17873488  |
| Phoca largha NC008430 1                 | Panthera leo NERO 19                  | 0,17873553  |
| Viverricula indica KX891745 1           | Canis mesomelas KT448280 1            | 0,17873567  |
| Tremarctos ornatus NC009692 2           | Mustela frenata NC020640 1            | 0,17873588  |
| Martes martes T302 3                    | Arctocepalus forsteri KT693377 17     | 0,17873681  |
| Neovison vison NC020641 3               | Arctocepalus townsendi NC008420 1     | 0,17873693  |
| Mustela erminea T305 2                  | Canis latrans NC008093 7              | 0,17873705  |
| Neovison vison NC020641 3               | Arctocepalus gazella BK010918 1       | 0,178737068 |
| Puma concolor NC016470 22               | Arctonyx collaris NC020645 1          | 0,17873744  |
| Monachus schauinslandi NC008421 1       | Urva semitorquata MH464789 1          | 0,17873748  |
| Mirounga angustirostris SRR10331586 1   | Canis aureus KT448274 1               | 0,17873756  |
| Mustela erminea T305 2                  | Felis margarita NC028308 1            | 0,17873796  |
| Phoca largha NC008430 1                 | Bdeogale nigripes GLC15 1             | 0,17873735  |
| Potos flavus T414 1                     | Leopardus wiedii NC028318 1           | 0,17873781  |
| Leptailurus serval NC028316 1           | Canis aureus KT448274 1               | 0,17873779  |
| Vulpes corsac NC023958 1                | Hydrurga leptonyx NC008425 1          | 0,17873784  |
| Ommatophoca rossii AY377287etc 1        | Genetta genetta T297 1                | 0,17873798  |
| Martes martes T302 3                    | Lynx canadensis NC028313 1            | 0,178738217 |
| Otaria byronia OTAB 1                   | Arctodus simus NC011116 1             | 0,178738366 |

|                                        |                                      |            |
|----------------------------------------|--------------------------------------|------------|
| Phocarcctos hookeri NC008418 1         | Panthera uncia KP202269 1            | 0,19177462 |
| Ursus arctos GU573491 207              | Galidictis fasciata DM333 1          | 0,19177478 |
| Urocyon littoralis catalinae KP129018  | Leopardus jacobita NC028322 1        | 0,19177519 |
| Urocyon cinereoargenteus NC026723 2    | Leopardus jacobita NC028322 1        | 0,19177528 |
| Urocyon littoralis catalinae KP129018  | Leptailurus serval NC028316 1        | 0,19177625 |
| Ursus arctos pruinosus MG066703 3      | Canis anthus NC027956 2              | 0,19177635 |
| Ursus arctos pruinosus MG066703 3      | Prionodon linsang ERR2391707 1       | 0,19177665 |
| Nasua nasua NC020647 1                 | Lynx rufus NC014456 3                | 0,19177693 |
| Urocyon littoralis catalinae KP129018  | Leopardus geoffroyi NC028320 1       | 0,19177717 |
| Prionodon pardicolor NC024569 2        | Aillurus fulgens NC011124 1          | 0,19177772 |
| Puma concolor NC016470 22              | Bassaricyon neblina SRX1097850 1     | 0,19177957 |
| Speothos venaticus C48 2               | Bassariscus sumichrasti SRX1099089 1 | 0,19178227 |
| Ursus arctos AP012576 6                | Mungos mungo gambianus SRR77048      | 0,19178784 |
| Lycalopex schurrae KT448284 1          | Arctocepalus gazella BK010918 1      | 0,19178991 |
| Ursus maritimus GU573488 Svalbard      | Panthera tigris amoyensis NC014770 2 | 0,19179137 |
| Proteles cristata T393 6               | Ictonyx striatus T299 1              | 0,19179453 |
| Panthera tigris amoyensis NC014770 2   | Lycan pictus NC028427 2              | 0,19179532 |
| Mephitis mephitis NC020648 1           | Leopardus guigna NC028321 1          | 0,19179742 |
| Spilogale putorius NC010497 1          | Lontra canadensis SRX10409165 1      | 0,19179976 |
| Spilogale putorius NC010497 1          | Arctocepalus australis MG023139 1    | 0,19179979 |
| Ursus arctos GU573486 5                | Panthera onca NC022842 1             | 0,1918     |
| Ursus thibetanus formosanus NC009331   | Panthera tigris NC010642 35          | 0,1918017  |
| Zalophus wollebaeki SRR4431565 1       | Panthera leo spelaea KX258452 2      | 0,19180636 |
| Ursus spelaeus NC011112 8              | Chrysocyon brachyurus NC024172 1     | 0,19180988 |
| Arctocepalus forsteri KT693377 17      | Tapirus terrestris T358              | 0,1918153  |
| Gulo gulo NC009685 3                   | Crocuta crocuta NC020670 3           | 0,19181991 |
| Canis anthus NC027956 2                | Callorhinus ursinus NC008415 1       | 0,19182372 |
| Vulpes ferrillata NC027935 1           | Xenogale naso CO7XAR110 1            | 0,19182654 |
| Helogale parvula SRR7637809 1          | Bassaricyon neblina SRX1097850 1     | 0,19182655 |
| Vulpes zerda KJ603240 1                | Xenogale naso CO7XAR110 1            | 0,1918273  |
| Phocarcctos hookeri NC008418 1         | Urva javanica T413 1                 | 0,19182734 |
| Vulpes corsac NC023958 1               | Arctocepalus gazella BK010918 1      | 0,19182768 |
| Galidia elegans D146 1                 | Bassaricyon neblina SRX1097850 1     | 0,19182774 |
| Mustela nigripes NC028309 1            | Eupleres goudotii D128 1             | 0,19182833 |
| Procyon lotor AB462046 3               | Galidictis fasciata DM333 1          | 0,19183333 |
| Procyon lotor AB462046 3               | Prionodon linsang ERR2391707 1       | 0,19183429 |
| Ursus arctos AP012576 6                | Panthera leo NERO 19                 | 0,19183522 |
| Vulpes zerda KJ603240 1                | Arctotherium sp NC030174 1           | 0,19183603 |
| Speothos venaticus C48 2               | Martes zibellina NC011579 39         | 0,19183762 |
| Ursus arctos EU497665 29               | Prionodon linsang ERR2391707 1       | 0,19183768 |
| Panthera uncia NC010638 1              | Martes melampus NC009678 1           | 0,19183878 |
| Ursus arctos isabellinus 1885 2        | Cynictis penicillata T375 1          | 0,19183807 |
| Otocyon megalotis SAF1 2               | Ichneumia albicauda T603 1           | 0,19183815 |
| Mustela nivalis T306 5                 | Cynogale bennetti KY117544 1         | 0,19183984 |
| Phocarcctos hookeri NC008418 1         | Parahyaena brunnea NC038159 15       | 0,1918419  |
| Lycalopex schurrae KT448284 1          | Conepatus chinga NC042596 1          | 0,19184199 |
| Speothos venaticus C48 2               | Ichneumia albicauda T603 1           | 0,19184256 |
| Viverricula indica NC025296 2          | Bassaricyon neblina SRX1097850 1     | 0,19184528 |
| Lutrogale perspicillata NC035811 1     | Felis chaus NC028307 1               | 0,19184586 |
| Felis nigripes NC028309 1              | Bassaricyon neblina SRX1097850 1     | 0,19184712 |
| Vulpes lagopus NC026529 3              | Ursus thibetanus formosanus NC009331 | 0,19184732 |
| Vulpes ferrillata NC027935 1           | Ursus thibetanus formosanus NC009331 | 0,19184756 |
| Ursus arctos pruinosus MG066703 3      | Mungotictis decemlineata NC027828 1  | 0,19184797 |
| Ursus arctos isabellinus 1885 2        | Panthera uncia NC010638 1            | 0,19185038 |
| Prionodon pardicolor NC024569 2        | Arctocepalus pusillus NC008417 1     | 0,19185074 |
| Profelis aurata NC028299 1             | Bassaricyon neblina SRX1097850 1     | 0,19185075 |
| Panthera tigris amoyensis NC014770 2   | Nyctereutes procyonoides NC013700 3  | 0,19185106 |
| Ursus thibetanus laniger MH281753 2    | Eupleres goudotii D128 1             | 0,19185287 |
| Ursus arctos GU573486 5                | Panthera uncia NC010638 1            | 0,19185732 |
| Ursus arctos isabellinus 1885 2        | Panthera leo spelaea KX258452 2      | 0,19185928 |
| Panthera tigris NC010642 35            | Lycan pictus NC028427 2              | 0,19186249 |
| Ursus spelaeus NC011112 8              | Panthera uncia NC010638 1            | 0,19186375 |
| Ursus americanus JX196366 3            | Eupleres goudotii D128 1             | 0,19186418 |
| Canis mesomelas KT448280 1             | Arctocepalus pusillus NC008417 1     | 0,19186454 |
| Conepatus chinga NC042596 1            | Canis lupus familiaris NC002008 1231 | 0,19186482 |
| Lutra lutra LC050126 1                 | Diplogale hosei MH464790 1           | 0,19186959 |
| Ursus thibetanus thibetanus NC011118 4 | Panthera tigris amoyensis NC014770 2 | 0,19187145 |
| Neofelis nebulosa NC008450 3           | Aillurus fulgens styani NC009691 1   | 0,19187267 |
| Neofelis nebulosa NC008450 3           | Melogale moschata W0735A 1           | 0,19187392 |
| Spilogale putorius NC010497 1          | Phocarcctos hookeri NC008418 1       | 0,19187394 |
| Spilogale putorius NC010497 1          | Leopardus jacobita NC028322 1        | 0,19187933 |
| Panthera leo NERO 19                   | Martes pennanti NC020664 16          | 0,19188282 |
| Spilogale putorius NC010497 1          | Speothos venaticus C48 2             | 0,19188848 |
| Vulpes corsac NC023958 1               | Callorhinus ursinus NC008415 1       | 0,19189048 |
| Panthera pardus NC010641 5             | Martes pennanti NC020664 16          | 0,19189067 |
| Vulpes vulpes NC008434 5               | Callorhinus ursinus NC008415 1       | 0,19189101 |
| Vulpes lagopus NC026529 3              | Melogale moschata W0735A 1           | 0,19189294 |
| Panthera leo NERO 19                   | Helarctos malayanus NC009968 2       | 0,19189835 |
| Ursus thibetanus thibetanus NC011118 4 | Neofelis nebulosa NC008450 3         | 0,19189872 |
| Potos flavus T414 1                    | Otocyon megalotis SAF1 2             | 0,19190285 |
| Suricata suricatta SSM10 1             | Poecilogale albinucha T602 1         | 0,19190398 |
| Ursus arctos isabellinus 1885 2        | Mungos mungo MMC7 1                  | 0,19190523 |
| Ursus arctos EU497665 29               | Mungos mungo MMC7 1                  | 0,19190556 |
| Ursus maritimus NC003428 31            | Mungos mungo MMC7 1                  | 0,1919056  |
| Ursus thibetanus mupiniensis NC008753  | Suricata suricatta SSM10 1           | 0,19190669 |
| Vulpes corsac NC023958 1               | Ursus arctos GU573486 5              | 0,19190958 |
| Ursus arctos GU573491 207              | Canis anthus NC027956 2              | 0,19191094 |
| Nasua nasua NC020647 1                 | Leopardus pardalis T262 1            | 0,19191244 |
| Panthera tigris amoyensis NC014770 2   | Mustela itatsi NC034330 19           | 0,19191505 |
| Crocuta crocuta NC020670 3             | Arctocepalus gazella BK010918 1      | 0,1919152  |
| Nyctereutes procyonoides NC013700 3    | Melurus ursinus NC009970 2           | 0,19191907 |
| Ursus arctos isabellinus 1885 2        | Lycan pictus NC028427 2              | 0,19192307 |
| Mephitis mephitis NC020648 1           | Leopardus pardalis NC028315 1        | 0,19192398 |
| Ursus arctos pruinosus MG066703 3      | Galerella sanguinea T378 1           | 0,19192564 |
| Ursus arctos AP012576 6                | Galidictis fasciata DM333 1          | 0,19192727 |
| Mephitis mephitis NC020648 1           | Felis chaus NC028307 1               | 0,19192737 |
| Ursus spelaeus NC011112 8              | Otocyon megalotis SAF1 2             | 0,19192807 |
| Odobenus rosmarus NC004029 29          | Lynx pardinus NC028319 161           | 0,19193098 |
| Eumetopias jubatus NC004030 10         | Cynogale bennetti KY117544 1         | 0,19193134 |
| Neofelis nebulosa NC008450 3           | Tapirus terrestris T358              | 0,19193135 |
| Nasua nasua NC020647 1                 | Leopardus colocolo NC028314 1        | 0,19193213 |
| Spilogale putorius NC010497 1          | Arctocepalus forsteri KT693377 17    | 0,19193463 |
| Zalophus wollebaeki SRR4431565 1       | Canis lupus chanco NC010340 4        | 0,19193521 |



|                                        |                                        |            |
|----------------------------------------|----------------------------------------|------------|
| Prionailurus rubiginosus NC028304 2    | Martes martes T302 3                   | 0,17878506 |
| Nandinia binotata NC024567 1           | Canis aureus KT448274 1                | 0,17878771 |
| Viverricula indica XK891745 1          | Lycan pictus NC028427 2                | 0,17879038 |
| Zalophus californianus NC008416 1      | Mustela putorius NC020638 4            | 0,17879187 |
| Viverricula indica NC025296 2          | Lycan pictus NC028427 2                | 0,17879203 |
| Ursus thibetanus formosanus NC009331 1 | Hemigalus derbyanus MH464791 1         | 0,17879441 |
| Meles leucurus NC039173 4              | Eumetopias jubatus NC004030 10         | 0,17879856 |
| Ursus thibetanus thibetanus NC011118 4 | Hemigalus derbyanus MH464791 1         | 0,17880423 |
| Meles meles T303 3                     | Civettictis civetta NC033378 1         | 0,17880887 |
| Leopardus geoffroyi NC028320 1         | Canis adustus KT448271 1               | 0,17881456 |
| Mustela kathiah NC023210 1             | Civettictis civetta NC033378 1         | 0,17881577 |
| Nasua nasua NC020647 1                 | Lutra sumatrana NC035810 1             | 0,17882393 |
| Arctotherium sp.NC030174 1             | Arctocepalus australis MG021319 1      | 0,17882508 |
| Spilogale putorius NC010497 1          | Phoca fasciata NC008428 1              | 0,17882575 |
| Halichoerus grypus NC001602 2          | Felis chaus NC028307 1                 | 0,17882659 |
| Mirounga leonina NC008422 1            | Cynictis penicillata T375 1            | 0,17883113 |
| Pusa sibirica NC008432 2               | Helogale parvula SRR7637809 1          | 0,17883113 |
| Phocarcus hookeri NC008418 1           | Mustela frenata NC020640 1             | 0,1788322  |
| Galidia elegans D146 1                 | Cystophora cristata NC008427 1         | 0,17883395 |
| Meles meles T303 3                     | Felis silvestris lybica KP202275 4     | 0,1788384  |
| Paradoxurus hermaphroditus NLNC 1      | Arctonyx collaris NC020645 1           | 0,17883974 |
| Paradoxurus hermaphroditus NLNC 1      | Meles leucurus NC039173 4              | 0,17883983 |
| Vulpes vulpes NC008434 5               | Civettictis civetta GLC19 1            | 0,17884068 |
| Neovison vison NC020641 3              | Attilax paludinosus T606 1             | 0,17884107 |
| Ursus arctos EU497665 29               | Potos flavus T414 1                    | 0,17884113 |
| Ursus maritimus NC003428 31            | Potos flavus T414 1                    | 0,17884117 |
| Paguma larvata PDD511 2                | Mustela sibirica AP017394 11           | 0,17884159 |
| Mirounga angustirostris SRR10331586 1  | Bassaricyon neblina SRX1097850 1       | 0,1788426  |
| Prionailurus bengalensis NC028301 12   | Mustela sibirica NC020637 6            | 0,17884277 |
| Prionailurus bengalensis CKM45 20      | Meles meles T303 3                     | 0,17884311 |
| Phoca largha NC008430 1                | Ursa javanica T413 1                   | 0,17884451 |
| Mustela frenata NC020640 1             | Arctictis binturong T605 2             | 0,17884968 |
| Civettictis civetta GLC19 1            | Arctodus simus NC011116 1              | 0,17885    |
| Arctodus simus NC011116 1              | Arctocepalus forsteri NC004023 28      | 0,17885219 |
| Monachus schauinslandi NC008421 1      | Lutrogale perspicillata NC035811 1     | 0,17885265 |
| Prionailurus rubiginosus NC028304 2    | Mustela nivalis T306 5                 | 0,17885265 |
| Phoca groenlandica NC008429 54         | Ichneumia albicauda T603 1             | 0,17885384 |
| Prionailurus bengalensis NC028301 12   | Arctodus simus NC011116 1              | 0,17885457 |
| Ursus thibetanus formosanus NC009331 1 | Arctonyx collaris NC020645 1           | 0,17885822 |
| Phoca largha NC008430 1                | Hyena hyaena NC020669 1                | 0,1788609  |
| Ursus thibetanus thibetanus NC011118 4 | Mustela eversmannii NC028013 1         | 0,17886123 |
| Zalophus californianus NC008416 1      | Fossa fossana D350 1                   | 0,17886208 |
| Spilogale putorius NC010497 1          | Pusa sibirica NC008432 2               | 0,17886367 |
| Mustela kathiah NC023210 1             | Canis lupus familiaris NC002008 1231   | 0,17886987 |
| Neovison vison NC020641 3              | Acinonyx jubatus NC005212 3            | 0,17887019 |
| Spilogale putorius NC010497 1          | Mustela frenata NC020640 1             | 0,17887029 |
| Paradoxurus jerdoni MH464793 1         | Canis lupus familiaris NC002008 1231   | 0,17887448 |
| Martes flavigula NC012141 3            | Arctocepalus townsendi NC008420 1      | 0,17887507 |
| Zalophus californianus NC008416 1      | Ursus thibetanus thibetanus NC011118 4 | 0,17888033 |
| Zalophus californianus NC008416 1      | Ursus thibetanus laniger MH281753 2    | 0,17888223 |
| Ommatophoca rossii AY377287etc 1       | Eupleres goudotii D128 1               | 0,17888433 |
| Mustela itatsi NC034330 19             | Hemigalus derbyanus MH464791 1         | 0,17889406 |
| Mirounga leonina NC008422 1            | Bdeogale nigripes GLC15 1              | 0,17889847 |
| Mustela frenata NC020640 1             | Canis aureus KT448274 1                | 0,17889856 |
| Lynx pardinus NC028319 161             | Arctonyx collaris NC020645 1           | 0,17890565 |
| Mustela nivalis T306 5                 | Crossarchus platycephalus C7R66 1      | 0,17890608 |
| Spilogale putorius NC010497 1          | Martes flavigula NC012141 3            | 0,17890796 |
| Martes foina NC020643 1                | Arctocepalus forsteri KT693377 17      | 0,17890958 |
| Phoca vitulina NC001325 1              | Ursa javanica T413 1                   | 0,17891198 |
| Taxidea taxus NC020646 1               | Mungotictis decemlineata NC027828 1    | 0,17891212 |
| Prionailurus viverrinus NC028305 1     | Potos flavus T414 1                    | 0,17891225 |
| Phoca vitulina NC001325 1              | Xenogale naso C07XAR110 1              | 0,17891273 |
| Leopardus tigrinus NC028317 1          | Canis adustus KT448271 1               | 0,1789159  |
| Salanoia concolor D378 1               | Ommatophoca rossii AY377287etc 1       | 0,17891636 |
| Ursus thibetanus laniger MH281753 2    | Taxidea taxus NC020646 1               | 0,17891638 |
| Pusa caspica NC008431 1                | Crocota crocata NC020670 3             | 0,17891739 |
| Phoca largha NC008430 1                | Paguma larvata PDD511 2                | 0,17891891 |
| Ursus thibetanus formosanus NC009331 1 | Mustela sibirica NC020637 6            | 0,17892389 |
| Phoca fasciata NC008428 1              | Parahyaena brunnea NC038159 15         | 0,17892396 |
| Phoca fasciata NC008428 1              | Panthera tigris amoyensis NC014770 2   | 0,17892554 |
| Ursus thibetanus formosanus NC009331 1 | Mustela putorius NC020638 4            | 0,17892621 |
| Ursus spelaeus NC011112 8              | Mustela sibirica AP017394 11           | 0,17892659 |
| Ursus thibetanus thibetanus NC011118 4 | Mustela frenata NC020640 1             | 0,17892714 |
| Homotherium latidens MF871702 3        | Chrysocyon brachyurus NC024172 1       | 0,1789286  |
| Mephitis mephitis NC020648 1           | Ailurus fulgens styani NC009691 1      | 0,17893148 |
| Nandinia binotata NC024567 1           | Canis lupus chanco NC010340 4          | 0,17893143 |
| Melogale moschata NC020644 1           | Leopardus colocolo NC028314 1          | 0,17893587 |
| Mustela eversmannii NC028013 1         | Eumetopias jubatus NC004030 10         | 0,17893627 |
| Prionailurus bengalensis CKM45 20      | Canis adustus KT448271 1               | 0,17893699 |
| Phoca groenlandica NC008429 54         | Ursa javanica/auropunctata NC006835 1  | 0,17894241 |
| Panthera uncia KP202269 1              | Monachus monachus NC044972 5           | 0,17894264 |
| Neofelis nebulosa NC008450 3           | Cystophora cristata NC008427 1         | 0,1789438  |
| Ursus arctos GU573486 5                | Ommatophoca rossii AY377287etc 1       | 0,17894787 |
| Nandinia binotata NC024567 1           | Conepatus chinga NC042596 1            | 0,17895249 |
| Spilogale putorius NC010497 1          | Poecilogale albinocha T602 1           | 0,17895658 |
| Civettictis civetta NC033378 1         | Bassaricyon sumichrasti SRX1099089 1   | 0,17895977 |
| Mustela erminea T305 2                 | Chrotogale owstoni T607 1              | 0,17896083 |
| Viverra tangalunga MH464792 1          | Homotherium latidens MF871702 3        | 0,17896371 |
| Ommatophoca rossii AY377287etc 1       | Catopuma temminckii NC027115 41        | 0,178964   |
| Chrotogale owstoni T607 1              | Ailurus fulgens styani NC009691 1      | 0,17896472 |
| Vulpes corsac NC023958 1               | Chrotogale cristata NC008427 1         | 0,17896616 |
| Homotherium latidens MF871702 3        | Callorhinus ursinus NC008415 1         | 0,17896768 |
| Neovison vison NC020641 3              | Diplogale hoesi MH464790 1             | 0,17896822 |
| Prionailurus planiceps KY682741 4      | Canis adustus KT448271 1               | 0,17896953 |
| Meles meles T303 3                     | Lynx pardinus NC028319 161             | 0,17897171 |
| Leopardus tigrinus NC028317 1          | Arctonyx collaris NC020645 1           | 0,1789728  |
| Lutra lutra NC011358 9                 | Leopardus pardalis T262 1              | 0,17897362 |
| Pusa caspica NC008431 1                | Paguma larvata PDD511 2                | 0,17897451 |
| Phoca groenlandica NC008429 54         | Bdeogale nigripes GLC15 1              | 0,17897563 |
| Viverricula indica NC025296 2          | Meles leucurus NC039173 4              | 0,17897612 |
| Mustela nigripes NC024942 1            | Leopardus pardalis T262 1              | 0,17897664 |
| Meles meles T303 3                     | Catopuma badia NC028300 1              | 0,17897671 |
| Mustela putorius NC020638 4            | Leopardus wiedii NC028318 1            | 0,17897692 |

|                                       |                                       |            |
|---------------------------------------|---------------------------------------|------------|
| Otaria byronia OTAB 1                 | Ursa javanica/auropunctata NC006835 1 | 0,19194053 |
| Phocarcus hookeri NC008418 1          | Ursa javanica/auropunctata NC006835 1 | 0,19194174 |
| Nyctereutes procyonoides NC013700 3   | Neofelis nebulosa NC008450 3          | 0,19194566 |
| Spilogale putorius NC010497 1         | Mungos mungo MMC7 1                   | 0,19194685 |
| Phocarcus hookeri NC008418 1          | Panthera pardus NC010641 5            | 0,19194895 |
| Odobenus rosmarus NC004029 29         | Melursus ursinus NC009970 2           | 0,19195189 |
| Panthera pardus NC010641 5            | Arctotherium sp.NC030174 1            | 0,1919547  |
| Martes zibellina NC011579 39          | Diplogale hoesi MH464790 1            | 0,19195834 |
| Urocyon littoralis catalinae KP129018 | Mungos mungo MMC7 1                   | 0,19196248 |
| Canis anthus NC027956 2               | Arctocepalus gazella BK010918 1       | 0,1919625  |
| Mustela sibirica NC020637 6           | Cynogale bennetti KY117544 1          | 0,19196351 |
| Phocarcus hookeri NC008418 1          | Nyctereutes procyonoides NC013700 3   | 0,19196419 |
| Panthera uncia KP202269 1             | Arctocepalus forsteri NC004023 28     | 0,19196551 |
| Urocyon littoralis catalinae KP129018 | Mustela kathiah NC023210 1            | 0,19196782 |
| Potos flavus T414 1                   | Lycalopex securae KT448284 1          | 0,19196968 |
| Vulpes ferrillata NC027935 1          | Ursus arctos isabellinus 18B5 2       | 0,19197118 |
| Ursus maritimus NC003428 31           | Cynictis penicillata T375 1           | 0,19197293 |
| Ursus arctos isabellinus 18B5 2       | Attilax paludinosus T606 1            | 0,19197297 |
| Ursus arctos EU497665 29              | Bdeogale nigripes GLC15 1             | 0,19197315 |
| Panthera pardus NC010641 5            | Galictis vittata T412 1               | 0,19197331 |
| Speothos venaticus C48 2              | Galerella sanguinea T378 1            | 0,19197364 |
| Diplogale hoesi MH464790 1            | Arctocepalus townsendi NC008420 1     | 0,19197389 |
| Panthera pardus japonensis KJ866876   | Arctocepalus forsteri KT693377 17     | 0,191974   |
| Vulpes ferrillata NC027935 1          | Panthera uncia NC010638 1             | 0,19197412 |
| Lycan pictus NC028427 2               | Galidia elegans D146 1                | 0,19197538 |
| Phocarcus hookeri NC008418 1          | Hyena hyaena NC020669 1               | 0,19197589 |
| Urocyon cinereoargenteus NC026723 2   | Leopardus tigrinus NC028317 1         | 0,19197626 |
| Martes foina NC020643 1               | Cynogale bennetti KY117544 1          | 0,19197702 |
| Ursus arctos GU573486 5               | Mungos mungo MMC7 1                   | 0,19197975 |
| Ursus arctos isabellinus 18B5 2       | Otocyon megalotis SAF1 2              | 0,19198309 |
| Ursus spelaeus EU327344 13            | Ursa semitorquata MH464789 1          | 0,19198382 |
| Vulpes corsac NC023958 1              | Panthera leo spelaeus KX258452 2      | 0,19198579 |
| Zalophus californianus NC008416 1     | Prionodon linsang ERR2391707 1        | 0,19198824 |
| Ursus spelaeus EU327344 13            | Ursa javanica T413 1                  | 0,19199045 |
| Panthera uncia KP202269 1             | Ailuropoda malanoleuca NC009492 5     | 0,19199097 |
| Ursus arctos pruinosis MG066703 3     | Prionodon pardicolor NC024569 2       | 0,19199117 |
| Panthera onca NC022842 1              | Arctotherium sp.NC030174 1            | 0,19199176 |
| Odobenus rosmarus NC004029 29         | Mustela altaica NC021751 1            | 0,19199272 |
| Ursus maritimus NC003428 31           | Panthera tigris amoyensis NC014770 2  | 0,19199321 |
| Ursus thibetanus mupinensis NC00875   | Panthera tigris NC010642 35           | 0,19199395 |
| Ursus arctos isabellinus 18B5 2       | Panthera onca NC022842 1              | 0,19199519 |
| Paradoxurus hermaphroditus NC03959    | Melursus ursinus NC009970 2           | 0,19199792 |
| Otaria byronia OTAB 1                 | Mephitis mephitis NC020648 1          | 0,19199854 |
| Ursus arctos AP012576 6               | Panthera uncia KP202269 1             | 0,19200179 |
| Ursus americanus JX196366 3           | Suricata suricatta S5M10 1            | 0,19200449 |
| Ursus arctos isabellinus 18B5 2       | Odobenus rosmarus NC004029 29         | 0,19200504 |
| Ursus thibetanus thibetanus NC011118  | Panthera tigris NC010642 35           | 0,19200607 |
| Vulpes vulpes NC008434 5              | Spilogale putorius NC010497 1         | 0,19200669 |
| Panthera pardus NC010641 5            | Arctocepalus forsteri KT693377 17     | 0,19201332 |
| Otaria byronia OTAB 1                 | Canis aureus KT448274 1               | 0,19201522 |
| Ursa javanica T413 1                  | Arctocepalus forsteri NC004023 28     | 0,19201697 |
| Spilogale putorius NC010497 1         | Lutrogale perspicillata NC035811 1    | 0,19201712 |
| Ursus thibetanus mupinensis NC00875   | Neofelis nebulosa NC008450 3          | 0,19202156 |
| Panthera pardus NC010641 5            | Lutrogale perspicillata NC035811 1    | 0,19202188 |
| Galictis vittata T412 1               | Canis lupus familiaris NC002008 1231  | 0,19202219 |
| Suricata suricatta S5M10 1            | Meles anakuma NC009677 1              | 0,19202399 |
| Ursus arctos GU573491 207             | Panthera pardus NC010641 5            | 0,19202451 |
| Vulpes ferrillata NC027935 1          | Eupleres goudotii D128 1              | 0,19202635 |
| Suricata suricatta S5M10 1            | Phocarcus hookeri NC008418 1          | 0,19202811 |
| Canis anthus NC027956 2               | Arctocepalus australis MG023139 1     | 0,19202846 |
| Urocyon cinereoargenteus NC026723 2   | Mungos mungo MMC7 1                   | 0,19202991 |
| Urocyon littoralis catalinae KP129018 | Arctocepalus pusillus NC008417 1      | 0,19203423 |
| Urocyon cinereoargenteus NC026723 2   | Arctocepalus pusillus NC008417 1      | 0,19203442 |
| Vulpes zerdia KJ603240 1              | Otaria byronia OTAB 1                 | 0,19203518 |
| Tremarctos ornatus NC009969 2         | Nasua nasua NC020647 1                | 0,19203523 |
| Prionodon litor AB462049 4            | Mungotictis decemlineata NC027828 1   | 0,19203526 |
| Speothos venaticus C48 2              | Lontra canadensis SRR10409165 1       | 0,19203934 |
| Ursus arctos GU573491 207             | Attilax paludinosus T606 1            | 0,19204038 |
| Ursus maritimus GU573488 Svalbard     | Attilax paludinosus T606 1            | 0,19204049 |
| Panthera uncia NC010638 1             | Arctocepalus australis MG023139 1     | 0,19204107 |
| Tremarctos ornatus NC009969 2         | Panthera uncia NC010638 1             | 0,19204342 |
| Vulpes vulpes NC008434 5              | Parahyaena brunnea NC038159 15        | 0,19204421 |
| Tremarctos ornatus NC009969 2         | Speothos venaticus C48 2              | 0,19204451 |
| Urocyon cinereoargenteus NC026723 2   | Leopardus guigna NC028321 1           | 0,19204625 |
| Ursus arctos pruinosis MG066703 3     | Mungos mungo/gambianus SRR77048       | 0,19204709 |
| Nasua nasua NC020647 1                | Felis margarita NC028308 1            | 0,19204739 |
| Arctocepalus townsendi NC008420 1     | Arctictis binturong T605 2            | 0,19204804 |
| Proteles cristata T393 6              | Lutrogale perspicillata NC035811 1    | 0,19204947 |
| Otocyon megalotis SAF1 2              | Diplogale hoesi MH464790 1            | 0,19205084 |
| Ursus thibetanus formosanus NC009331  | Ursa brachyura KY117547 1             | 0,19205247 |
| Vulpes ferrillata NC027935 1          | Panthera leo spelaeus KX258452 2      | 0,19205515 |
| Speothos venaticus C48 2              | Arctocepalus forsteri KT693377 17     | 0,19205642 |
| Ursus arctos AP012576 6               | Cynictis penicillata T375 1           | 0,19205643 |
| Ursus arctos pruinosis MG066703 3     | Parahyaena brunnea NC038159 15        | 0,19205764 |
| Ursus arctos EU497665 29              | Felis silvestris lybica KP202275 4    | 0,19205987 |
| Ursus arctos EU497665 29              | Panthera leo spelaeus KX258452 2      | 0,19206139 |
| Ursus arctos GU573491 207             | Odobenus rosmarus NC004029 29         | 0,19207253 |
| Neofelis nebulosa NC008450 3          | Callorhinus ursinus NC008415 1        | 0,19207491 |
| Enhydra lutris NC009692 1             | Cynogale bennetti KY117544 1          | 0,19208431 |
| Vulpes lagopus NC026529 3             | Callorhinus ursinus NC008415 1        | 0,19209334 |
| Vulpes corsac NC023958 1              | Arctocepalus forsteri KT693377 17     | 0,19209534 |
| Vulpes ferrillata NC027935 1          | Ursa javanica T413 1                  | 0,19209595 |
| Prionodon litor AB462049 4            | Galidictis fasciata DM333 1           | 0,19210227 |
| Chrotogale owstoni T607 1             | Aonyx cinerea NC035814 2              | 0,19210206 |
| Vulpes zerdia KJ603240 1              | Chrotogale owstoni T607 1             | 0,19210288 |
| Galidictis fasciata DM333 1           | Tapirus terrestris T358               | 0,19210385 |
| Otocyon megalotis SAF1 2              | Xenogale naso C07XAR110 1             | 0,19210477 |
| Speothos venaticus C48 2              | Cynogale bennetti KY117544 1          | 0,19210529 |
| Otocyon megalotis SAF1 2              | Galidia elegans D146 1                | 0,1921088  |
| Vulpes zerdia KJ603240 1              | Panthera uncia KP202269 1             | 0,19210935 |
| Ursus thibetanus mupinensis NC00875   | Nasua nasua NC020647 1                | 0,19211103 |
| Urocyon cinereoargenteus NC026723 2   | Prionodon pardicolor NC024569 2       | 0,19211122 |
| Lycalopex securae KT448284 1          | Xenogale naso C07XAR110 1             | 0,19211133 |

|                                        |                                       |            |
|----------------------------------------|---------------------------------------|------------|
| Vulpes vulpes NC008434 5               | Viverricula indica NC025296 2         | 0,17897736 |
| Vulpes vulpes NC008434 5               | Pusa hispida NC 008433 1              | 0,17897758 |
| Nandinia binotata NC024567 1           | Lyacon pictus NC028427 2              | 0,17897825 |
| Phoca vitulina NC001325 1              | Canis latrans NC008093 7              | 0,17897908 |
| Prionailurus bengalensis CKM45 20      | Ailurus fulgens styani NC009691 1     | 0,17897922 |
| Taxidea taxus NC020646 1               | Felis margarita NC028308 1            | 0,17897958 |
| Taxidea taxus NC020646 1               | Salanoia concolor D378 1              | 0,17897981 |
| Prionailurus rubiginosus NC028304 2    | Martes zibellina NC011579 39          | 0,17897999 |
| Ursus arctos EU497665 29               | Mustela erminea T305 2                | 0,17898531 |
| Mirounga leonina NC008422 1            | Chrysocyon brachyurus NC024172 1      | 0,17898588 |
| Phoca fasciata NC008428 1              | Lyacon pictus NC028427 2              | 0,1789868  |
| Prionailurus planiceps KY682741 4      | Mustela nivalis T306 5                | 0,17898709 |
| Martes martes T302 3                   | Felis silvestris lybica KP202275 4    | 0,17898731 |
| Meles meles T303 3                     | Acinonyx jubatus NC005212 3           | 0,17898941 |
| Monachus schauinslandi NC008421 1      | Lyacon pictus NC028427 2              | 0,17899053 |
| Ursus spelaeus EU327344 13             | Nandinia binotata NC024567 1          | 0,17899092 |
| Martes foina NC020643 1                | Felis silvestris lybica KP202275 4    | 0,17899188 |
| Mustela nigripes NC024942 1            | Acinonyx jubatus NC005212 3           | 0,17899306 |
| Ursus thibetanus laniger MH281753 2    | Mustela nigripes NC024942 1           | 0,17899504 |
| Panthera leo NERO 19                   | Halichoerus grypus NC001602 2         | 0,17899682 |
| Smilodon populator MF871700 1          | Enhydra lutris NC009692 1             | 0,17899759 |
| Ursus americanus JX196366 3            | Eumetopias jubatus NC004030 10        | 0,17899847 |
| Lobodon carcinophaga NC008423 1        | Crocota crocata NC020670 3            | 0,17900006 |
| Monachus monachus NC0044972 5          | Galidictis fasciata DM333 1           | 0,17900962 |
| Halichoerus grypus NC001602 2          | Attilax paludinosus T606 1            | 0,17901514 |
| Lutra lutra NC011358 9                 | Fossa fossana D350 1                  | 0,17902577 |
| Suricata suricatta SSM10 1             | Mirounga leonina NC008422 1           | 0,17903313 |
| Mustela frenata NC020640 1             | Canis anthus NC027956 2               | 0,17903602 |
| Mustela itatsi NC0034330 19            | Arctocepalus pusillus NC008417 1      | 0,17903662 |
| Martes martes T302 3                   | Arctocepalus townsendi NC008420 1     | 0,17903729 |
| Prionailurus rubiginosus NC028304 2    | Enhydra lutris NC009692 1             | 0,17903933 |
| Meles leucurus NC039173 4              | Leopardus wiedii NC028318 1           | 0,17903955 |
| Paradoxurus jerdoni MH464793 1         | Cystophora cristata NC008427 1        | 0,17904177 |
| Puma yagouaroundi NC028311 1           | Mustela frenata NC020640 1            | 0,17904209 |
| Paradoxurus hermaphroditus NC039591 1  | Arctonyx collaris NC020645 1          | 0,17904238 |
| Mustela frenata NC020640 1             | Lynx lynx NC027083 4                  | 0,17904279 |
| Phoca fasciata NC008428 1              | Xenogale naso CO7XAR110 1             | 0,17904282 |
| Pusa hispida NC 008433 1               | Helogale parvula SRR7637809 1         | 0,17904297 |
| Phoca groenlandica NC008429 54         | Attilax paludinosus T606 1            | 0,17904307 |
| Phoca fasciata NC008428 1              | Canis mesomelas KT448280 1            | 0,17904323 |
| Paguma larvata PDD511 2                | Mustela eversmannii NC028013 1        | 0,17904325 |
| Phocarcotus hookeri NC008418 1         | Arctodus simus NC011116 1             | 0,17904448 |
| Martes americana NC020642 1            | Lynx canadensis NC028313 1            | 0,17904501 |
| Prionailurus viverrinus NC028305 1     | Martes melampus NC009678 1            | 0,17904511 |
| Otocolobus manul NC028323 1            | Mustela nigripes NC024942 1           | 0,17904562 |
| Phoca groenlandica NC008429 54         | Galidictis fasciata DM333 1           | 0,17904641 |
| Mirounga leonina NC008422 1            | Ichnemouia albicauda T603 1           | 0,17904645 |
| Homotherium latidens MF871702 3        | Arctocepalus pusillus NC008417 1      | 0,17904669 |
| Phoca vitulina NC001325 1              | Bdeogale nigripes GLC15 1             | 0,17904688 |
| Neovison vison NC020641 3              | Arctocepalus pusillus NC008417 1      | 0,17904742 |
| Prionailurus bengalensis CKM45 20      | Mustela nigripes NC024942 1           | 0,1790489  |
| Urocyon cinereoargenteus NC026723 21   | Lobodon carcinophaga NC008423 1       | 0,17905016 |
| Ursus thibetanus mupinensis NC008753 2 | Mustela nigripes NC024942 1           | 0,17905188 |
| Martes pennanti NC020664 16            | Lynx pardinus NC028319 161            | 0,17905231 |
| Arctodus simus NC011116 1              | Aonyx cinerea NC035814 2              | 0,17905329 |
| Ursus thibetanus thibetanus NC011118 4 | Taxidea taxus NC020646 1              | 0,17905338 |
| Helarctos malayanus NC009968 2         | Arctocepalus forsteri KT693377 17     | 0,17905623 |
| Neovison vison NC020641 3              | Arctotherium sp NC030174 1            | 0,17905915 |
| Ursus spelaeus NC011112 8              | Hemigalea derbyanus MH464791 1        | 0,17905951 |
| Ursus thibetanus laniger MH281753 2    | Mustela sibirica NC020637 6           | 0,17905964 |
| Neophoca cinerea NC008419 1            | Helarctos malayanus NC009968 2        | 0,17905982 |
| Phoca groenlandica NC008429 54         | Chrysocyon brachyurus NC024172 1      | 0,17906175 |
| Phoca vitulina NC001325 1              | Panthera tigris amoyensis NC014770 2  | 0,17906775 |
| Arctodus simus NC011116 1              | Acinonyx jubatus NC005212 3           | 0,17907155 |
| Martes flavigula NC012141 3            | Homotherium latidens MF871702 3       | 0,17907207 |
| Monachus monachus NC0044972 5          | Cryptoprocta ferox CF13 1             | 0,17908448 |
| Ursus maritimus GU573488 Svalbard      | Ommatophoca rossii AY377287etc 1      | 0,17908667 |
| Zalophus californianus NC008416 1      | Gulo gulo NC009685 3                  | 0,17908669 |
| Arctotherium sp NC030174 1             | Arctocepalus forsteri KT693377 17     | 0,17909457 |
| Lutra lutra LC050126 1                 | Arctocepalus gazella BK010918 1       | 0,17909463 |
| Otaria byronia OTAB 1                  | Lutra lutra NC011358 9                | 0,17909697 |
| Phoca vitulina NC001325 1              | Panthera pardus NC010641 5            | 0,17909725 |
| Panthera uncia NC010638 1              | Halichoerus grypus NC001602 2         | 0,17909871 |
| Ursus arctos EU497665 29               | Ommatophoca rossii AY377287etc 1      | 0,17910123 |
| Nyctereutes procyonoides NC013700 3    | Cystophora cristata NC008427 1        | 0,17910223 |
| Mustela kathiah NC023210 1             | Homotherium latidens MF871702 3       | 0,17910728 |
| Puma concolor NC016470 22              | Meles meles T303 3                    | 0,17910796 |
| Smilodon populator MF871700 1          | Arctonyx collaris NC020645 1          | 0,17910935 |
| Prionailurus bengalensis CKM45 20      | Enhydra lutris NC009692 1             | 0,17911077 |
| Martes melampus NC009678 1             | Felis silvestris lybica KP202275 4    | 0,17911084 |
| Arctotherium sp NC030174 1             | Arctonyx collaris NC020645 1          | 0,17911102 |
| Viverra zibetha T609 1                 | Mustela sibirica AP017394 11          | 0,17911114 |
| Paguma larvata PDD511 2                | Mustela nigripes NC024942 1           | 0,17911132 |
| Viverricula indica NC025296 2          | Meles meles T303 3                    | 0,17911163 |
| Zalophus wolfebaeki SRR4431565 1       | Lutra sumatrana NC035810 1            | 0,17911288 |
| Pusa caspica NC008431 1                | Panthera uncia NC010638 1             | 0,17911342 |
| Prionailurus planiceps KY682741 4      | Neovison vison NC020641 3             | 0,17912322 |
| Prionailurus bengalensis NC028301 12   | Neovison vison NC020641 3             | 0,17912427 |
| Mustela nivalis T306 5                 | Leopardus geoffroyi NC028320 1        | 0,17912447 |
| Zalophus californianus NC008416 1      | Meles leucurus NC039173 4             | 0,17912585 |
| Smilodon populator MF871700 1          | Ommatophoca rossii AY377287etc 1      | 0,17912634 |
| Prionailurus planiceps KY682741 4      | Martes foina NC020643 1               | 0,17912677 |
| Parahyaena brunnea NC038159 15         | Mirounga angustirostris SRR10331586 1 | 0,17912786 |
| Phoca fasciata NC008428 1              | Arctictis binturong T605 2            | 0,17912817 |
| Ursus spelaeus NC011112 8              | Mustela sibirica NC020637 6           | 0,17912853 |
| Ursus thibetanus laniger MH281753 2    | Mustela putorius NC020638 4           | 0,1791295  |
| Procyon lotor AB462046 3               | Homotherium latidens MF871702 3       | 0,17913744 |
| Spilogale putorius NC010497 1          | Mustela nigripes NC024942 1           | 0,17914447 |
| Monachus monachus NC0044972 5          | Lyacon pictus NC028427 2              | 0,17914999 |
| Lobodon carcinophaga NC008423 1        | Tapirus terrestris T358               | 0,179157   |
| Meles leucurus NC039173 4              | Chrotogale owstoni T607 1             | 0,17916188 |
| Arctocepalus australis MG023139 1      | Ailurus fulgens styani NC009691 1     | 0,17916384 |
| Suricata suricatta SSM10 1             | Pusa caspica NC008431 1               | 0,17916779 |

|                                       |                                      |            |
|---------------------------------------|--------------------------------------|------------|
| Zalophus californianus NC008416 1     | Cuon alpinus NC013445 3              | 0,19211231 |
| Ursus arctos GU573486 5               | Prionodon linsang ERR2391707 1       | 0,19211313 |
| Melursus ursinus NC009970 2           | Urva semitorquata MH464789 1         | 0,19211647 |
| Proteles cristata T393 6              | Arctocepalus forsteri KT693377 17    | 0,1921176  |
| Otocolobus manul NC028323 1           | Bassaricyon neblina SRX1097850 1     | 0,19211836 |
| Ursus arctos pruinus MG066703 3       | Panthera uncia KP202269 1            | 0,19212024 |
| Ursus spelaeus EU327344 13            | Attilax paludinosus T606 1           | 0,19212091 |
| Ursus spelaeus NC011112 8             | Urva brachyura KY117547 1            | 0,19212139 |
| Panthera leo spelaea KX258452 2       | Martes pennanti NC020664 16          | 0,19212456 |
| Panthera uncia NC010638 1             | Lycalopex sechurae KT448284 1        | 0,19213042 |
| Spilogale putorius NC010497 1         | Attilax paludinosus T606 1           | 0,19213934 |
| Prionodon linsang ERR2391707 1        | Tapirus terrestris T358              | 0,19214706 |
| Vulpes corsac NC023958 1              | Panthera pardus NC010641 5           | 0,19215162 |
| Neofelis nebulosa NC008450 3          | Martes pennanti NC020664 16          | 0,19215237 |
| Mellivora capensis T370 1             | Cystophora cristata NC008427 1       | 0,19215806 |
| Lyacon pictus NC028427 2              | Arctocepalus forsteri NC004023 28    | 0,19215854 |
| Hyaina hyaena NC020669 1              | Arctocepalus forsteri NC004023 28    | 0,19216107 |
| Urocyon littoralis catalinae KP129018 | Callorhinus ursinus NC008415 1       | 0,19216256 |
| Suricata suricatta SSM10 1            | Arctocepalus gazella BK010918 1      | 0,19216365 |
| Vulpes ferrillata NC027935 1          | Aonyx cinerea NC035814 2             | 0,19216555 |
| Paradoxurus hermaphroditus NLNC 1     | Arctocepalus townsendi NC008420 1    | 0,19216581 |
| Lutrogale perspicillata NC035811 1    | Helogale parvula SRR7637809 1        | 0,19216599 |
| Paradoxurus hermaphroditus NC03959    | Arctocepalus gazella BK010918 1      | 0,19216742 |
| Vulpes lagopus NC026529 3             | Ursus arctos EU497665 29             | 0,19217271 |
| Vulpes ferrillata NC027935 1          | Martes foina NC020643 1              | 0,1921777  |
| Hyaina hyaena NC020669 1              | Arctocepalus townsendi NC008420 1    | 0,19217773 |
| Panthera pardus japonensis KJ866876   | Lutrogale perspicillata NC035811 1   | 0,19218047 |
| Zalophus wolfebaeki SRR4431565 1      | Vulpes ferrillata NC027935 1         | 0,19218074 |
| Urocyon littoralis catalinae KP129018 | Leopardus guigna NC028321 1          | 0,19218084 |
| Leopardus jacobita NC028322 1         | Bassaricyon neblina SRX1097850 1     | 0,19218479 |
| Ursus javanicus T413 1                | Ailuropoda melanoleuca NC009492 5    | 0,19218479 |
| Ursus arctos GU573491 207             | Otocyon megalotis SAF1 2             | 0,19218497 |
| Ursus arctos isabellinus 1885 2       | Galerella sanguinea T378 1           | 0,19218677 |
| Ursus spelaeus EU327344 13            | Urva brachyura KY117547 1            | 0,19218871 |
| Prionodon linsang ERR2391707 1        | Melursus ursinus NC009970 2          | 0,19219024 |
| Phocarcotus hookeri NC008418 1        | Panthera onca NC022842 1             | 0,19219038 |
| Neofelis nebulosa NC008450 3          | Martes flavigula NC012141 3          | 0,19219248 |
| Zalophus wolfebaeki SRR4431565 1      | Prionodon pardicolor NC024569 2      | 0,19219522 |
| Ursus thibetanus mupinensis NC00875   | Panthera tigris amoyensis NC014770 2 | 0,19219621 |
| Ursus arctos AP012576 6               | Otocyon megalotis SAF1 2             | 0,19220123 |
| Odobenus rosmarus NC004029 29         | Leopardus guigna NC028321 1          | 0,19220185 |
| Ursus maritimus GU573488 Svalbard     | Cuon alpinus NC013445 3              | 0,19221909 |
| Spilogale putorius NC010497 1         | Nasua nasua NC020647 1               | 0,19222105 |
| Galidia elegans D146 1                | Arctocepalus forsteri NC004023 28    | 0,19222601 |
| Helogale parvula SRR7637809 1         | Arctocepalus townsendi NC008420 1    | 0,19222905 |
| Urocyon cinereoargenteus NC026723 2   | Callorhinus ursinus NC008415 1       | 0,19222985 |
| Ursus americanus JX196366 3           | Panthera leo spelaea KX258452 2      | 0,19223168 |
| Vulpes zerda KJ603240 1               | Bdeogale nigripes GLC15 1            | 0,19223182 |
| Vulpes corsac NC023958 1              | Galidia elegans D146 1               | 0,19223361 |
| Neofelis nebulosa NC008450 3          | Canis aureus KT448274 1              | 0,19223605 |
| Vulpes zerda KJ603240 1               | Arctonyx collaris NC020645 1         | 0,19223621 |
| Ursus arctos GU573491 207             | Prionodon linsang ERR2391707 1       | 0,19224156 |
| Panthera uncia NC010638 1             | Arctocepalus forsteri KT693377 17    | 0,19224304 |
| Chrysocyon brachyurus NC024172 1      | Arctocepalus australis MG023139 1    | 0,19224555 |
| Urva semitorquata MH464789 1          | Ailuropoda melanoleuca NC009492 5    | 0,19225048 |
| Parahyaena brunnea NC038159 15        | Ailurus fulgens styani NC009691 1    | 0,19225051 |
| Neophoca cinerea NC008419 1           | Crocota crocata NC020670 3           | 0,19225065 |
| Odobenus rosmarus NC004029 29         | Mustela eversmannii NC028013 1       | 0,19225268 |
| Panthera uncia NC010638 1             | Martes martes T302 3                 | 0,19225337 |
| Vulpes ferrillata NC027935 1          | Ursus spelaeus NC011112 8            | 0,19225383 |
| Ursus arctos GU573491 207             | Panthera uncia KP202269 1            | 0,19225463 |
| Vulpes zerda KJ603240 1               | Arctictis binturong T605 2           | 0,19225523 |
| Ursus spelaeus EU327344 13            | Suricata suricatta SSM10 1           | 0,19225663 |
| Mephitis mephitis NC020648 1          | Helogale parvula SRR7637809 1        | 0,19226031 |
| Mephitis mephitis NC020648 1          | Canis anthus NC027956 2              | 0,19226218 |
| Felis nigripes NC028309 1             | Ailuropoda melanoleuca NC009492 5    | 0,19226234 |
| Ursus maritimus GU573488 Svalbard     | Panthera tigris NC010642 35          | 0,19226277 |
| Zalophus californianus NC008416 1     | Vulpes ferrillata NC027935 1         | 0,19226336 |
| Mephitis mephitis NC020648 1          | Lynx rufus NC014456 3                | 0,19226791 |
| Spilogale putorius NC010497 1         | Mungos mungo/gambianus SRR77048      | 0,19228485 |
| Urocyon littoralis catalinae KP129018 | Eumetopias jubatus NC004030 10       | 0,19228493 |
| Panthera uncia KP202269 1             | Cuon alpinus NC013445 3              | 0,19228587 |
| Arctocepalus gazella BK010918 1       | Tapirus terrestris T358              | 0,19228789 |
| Procyon lotor AB462046 3              | Neofelis nebulosa NC008450 3         | 0,19228804 |
| Vulpes lagopus NC026529 3             | Conepatus chinga NC042596 1          | 0,19229127 |
| Spilogale putorius NC010497 1         | Leopardus guigna NC028321 1          | 0,19229157 |
| Lontra canadensis SRR10409165 1       | Conepatus chinga NC042596 1          | 0,19229396 |
| Mustela erminea T305 2                | Tapirus terrestris T358              | 0,19229487 |
| Lontra canadensis SRR10409165 1       | Urva brachyura KY117547 1            | 0,19229516 |
| Vulpes ferrillata NC027935 1          | Callorhinus ursinus NC008415 1       | 0,19229542 |
| Diplogale hosei MH464790 1            | Arctocepalus forsteri NC004023 28    | 0,1922989  |
| Melogale moschata KP726273 1          | Cynogale bennetti KY117544 1         | 0,19229956 |
| Mustela eversmannii NC028013 1        | Cynogale bennetti KY117544 1         | 0,19230041 |
| Vulpes lagopus NC026529 3             | Bassariscus sumichrasti SRX1099089 1 | 0,19230308 |
| Urocyon cinereoargenteus NC026723 2   | Mustela kathiah NC023210 1           | 0,19230445 |
| Procyon lotor AB462046 3              | Mungotictis decemlineata NC027828 1  | 0,19230501 |
| Ursus arctos AP012576 6               | Panthera pardus NC010641 5           | 0,19230646 |
| Otocyon megalotis SAF1 2              | Urva brachyura KY117547 1            | 0,1923065  |
| Panthera onca NC022842 1              | Arctocepalus forsteri NC004023 28    | 0,19230793 |
| Vulpes lagopus NC026529 3             | Hyaina hyaena NC020669 1             | 0,19230841 |
| Urocyon littoralis catalinae KP129018 | Prionodon pardicolor NC024569 2      | 0,19231325 |
| Speothos venaticus C48 2              | Meles anakuma NC009677 1             | 0,19231388 |
| Ursus spelaeus NC011112 8             | Cynogale bennetti KY117544 1         | 0,19231476 |
| Ursus arctos GU573486 5               | Attilax paludinosus T606 1           | 0,19231626 |
| Proteles cristata T393 6              | Neophoca cinerea NC008419 1          | 0,19231911 |
| Smilodon populator MF871700 1         | Odobenus rosmarus NC004029 29        | 0,19231981 |
| Canis mesomelas KT448280 1            | Callorhinus ursinus NC008415 1       | 0,19232194 |
| Tremarctos ornatus NC009969 2         | Proteles cristata T393 6             | 0,19232553 |
| Ursus arctos isabellinus 1885 2       | Panthera tigris amoyensis NC014770 2 | 0,19232887 |
| Panthera pardus japonensis KJ866876   | Chrysocyon brachyurus NC024172 1     | 0,19232953 |
| Vulpes ferrillata NC027935 1          | Ura javanica/aruopunctata NC006835   | 0,19233602 |
| Prionodon pardicolor NC024569 2       | Mephitis mephitis NC020648 1         | 0,19233929 |
| Vulpes lagopus NC026529 3             | Ursus americanus JX196366 3          | 0,19234067 |

|                                          |                                        |            |
|------------------------------------------|----------------------------------------|------------|
| Martes zibellina NCO11579 39             | Arctocepalus gazella BK010918 1        | 0,17916784 |
| Galidia elegans D146 1                   | Erignathus barbatus NCO08426 1         | 0,17917092 |
| Pusa caspica NCO08431 1                  | Lycalopex sechurae KT448284 1          | 0,17917131 |
| Otaria byronia OTAB 1                    | Mustela putorius NCO20638 4            | 0,17917401 |
| Otaria byronia OTAB 1                    | Mustela nigripes NCO24942 1            | 0,17917432 |
| Panthera tigris NCO10642 35              | Halichoerus grypus NCO01602 2          | 0,17917432 |
| Potos flavus T414 1                      | Paguma larvata PDD511 2                | 0,17917491 |
| Taxidea taxus NCO20646 1                 | Urva semitorquata MH464789 1           | 0,17917556 |
| Viverricula indica KX891745 1            | Potos flavus T414 1                    | 0,17917593 |
| Suricata suricatta SSM10 1               | Phoca groenlandica NCO08429 54         | 0,17917788 |
| Mustela sibirica AP017394 11             | Leopardus pardalis NCO28315 1          | 0,17917825 |
| Paguma larvata PDD511 2                  | Mustela sibirica NCO20637 6            | 0,17917828 |
| Viverra zibetha T609 1                   | Mustela sibirica NCO20637 6            | 0,1791786  |
| Monachus schauinslandi NCO08421 1        | Cynictis penicillata T375 1            | 0,17917864 |
| Prionailurus planiceps KY682741 4        | Mustela nigripes NCO24942 1            | 0,17917924 |
| Martes foina NCO20643 1                  | Crossarchus platycephalus C7R66 1      | 0,1791793  |
| Prionailurus rubiginosus NCO28304 2      | Mustela sibirica AP017394 11           | 0,17917931 |
| Melogale moschata KP726273 1             | Leopardus pardalis NCO28315 1          | 0,17918009 |
| Mustela erminea T305 2                   | Civettictis civetta GLC19 1            | 0,17918088 |
| Zalophus wolfebaeki SRR4431565 1         | Mustela putorius NCO20638 4            | 0,17918165 |
| Leopardus guigna NCO28321 1              | Canis adustus KT448271 1               | 0,17918251 |
| Ursus thibetanus mupienensis NCO08753 2  | Mustela sibirica NCO20637 6            | 0,17918369 |
| Urocyon littoralis catalinae KP129018 15 | Lobodon carcinophaga NCO08423 1        | 0,17918478 |
| Mustela frenata NCO20640 1               | Chrysoyon brachyurus NCO24172 1        | 0,17918479 |
| Panthera tigris NCO10642 35              | Erignathus barbatus NCO08426 1         | 0,17918703 |
| Martes americana NCO20642 1              | Canis adustus KT448271 1               | 0,17918782 |
| Smilodon populator MF871700 1            | Mustela frenata NCO20640 1             | 0,17918903 |
| Galidia elegans D146 1                   | Canis adustus KT448271 1               | 0,17919053 |
| Mirounga angustirostris SRR10331586 1    | Cryptoprocta ferox FC13 1              | 0,17919064 |
| Zalophus californianus NCO08416 1        | Viverra tangalunga MH464792 1          | 0,17919277 |
| Phoca largha NCO08430 1                  | Panthera uncia NCO10638 1              | 0,17919427 |
| Leopardus colocolo NCO28314 1            | Arctonyx collaris NCO20645 1           | 0,17919435 |
| Zalophus californianus NCO08416 1        | Mustela sibirica AP017394 11           | 0,17919502 |
| Ursus thibetanus thibetanus NCO11118 4   | Meles anakuma NCO09677 1               | 0,17919607 |
| Procyon lotor AB462049 4                 | Ommatophoca rossii AY377287etc 1       | 0,17919888 |
| Panthera tigris NCO10642 35              | Monachus schauinslandi NCO08421 1      | 0,17919905 |
| Pusa hispida NC 008433 1                 | Crocota crocata NCO20670 3             | 0,17919958 |
| Phoca largha NCO08430 1                  | Panthera tigris amoyensis NCO14770 2   | 0,17920241 |
| Ursus americanus JX196366 3              | Hemigalus derbyanus MH464791 1         | 0,17920375 |
| Ommatophoca rossii AY377287etc 1         | Mustela altaica NCO21751 1             | 0,17920706 |
| Mustela sibirica NCO20637 6              | Hemigalus derbyanus MH464791 1         | 0,17920902 |
| Ursus thibetanus formosanus NCO09331 1   | Neowison vison NCO20641 3              | 0,17921108 |
| Mustela nigripes NCO24942 1              | Canis lupus chanco NCO10340 4          | 0,17921178 |
| Eumetopias jubatus NCO04030 10           | Aonyx cinerea NCO35814 2               | 0,17921346 |
| Zalophus californianus NCO08416 1        | Ursus thibetanus formosanus NCO09331 1 | 0,17921507 |
| Mungotictis decemlineata NCO27828 1      | Monachus monachus NCO44972 5           | 0,17921624 |
| Vulpes lagopus NCO26529 3                | Smilodon populator MF871700 1          | 0,17921735 |
| Viverricula indica NCO25296 2            | Lycalopex sechurae KT448284 1          | 0,17922503 |
| Lutra lutra LC050126 1                   | Arctocepalus townsendi NCO08420 1      | 0,17922834 |
| Tremarctos ornatus NCO09969 2            | Martes pennanti NCO20664 16            | 0,17922944 |
| Arctotherium sp NCO30174 1               | Arctocepalus gazella BK010918 1        | 0,17923209 |
| Lycalopex sechurae KT448284 1            | Cystophora cristata NCO08427 1         | 0,179231   |
| Panthera pardus japonensis KJ866876 8    | Halichoerus grypus NCO01602 2          | 0,17923366 |
| Callorhinus ursinus NCO08415 1           | Aonyx cinerea NCO35814 2               | 0,17923811 |
| Otaria byronia OTAB 1                    | Arctotherium sp NCO30174 1             | 0,17923926 |
| Meles meles T303 3                       | Lynx canadensis NCO28313 1             | 0,17924051 |
| Otaria byronia OTAB 1                    | Mustela sibirica AP017394 11           | 0,17924091 |
| Meles leucurus NCO39173 4                | Leopardus pardalis NCO28315 1          | 0,17924097 |
| Lynx pardinus NCO28319 161               | Lutra lutra NCO11358 9                 | 0,17924245 |
| Lutra lutra LC050126 1                   | Leopardus wiedii NCO28318 1            | 0,17924295 |
| Meles meles T303 3                       | Civettictis civetta GLC19 1            | 0,17924431 |
| Civettictis civetta GLC19 1              | Arctonyx collaris NCO20645 1           | 0,17924543 |
| Lutra sumatrana NCO35810 1               | Leopardus pardalis T262 1              | 0,17924646 |
| Canis adustus KT448271 1                 | Attilax paludinosus T606 1             | 0,17924716 |
| Mirounga leonina NCO08422 1              | Cryptoprocta ferox FC13 1              | 0,17924726 |
| Mirounga angustirostris SRR10331586 1    | Xenogale nasu C07XAR110 1              | 0,17924748 |
| Melogale moschata KP726273 1             | Leopardus pardalis T262 1              | 0,17924756 |
| Prionailurus rubiginosus NCO28304 2      | Melogale moschata KP726273 1           | 0,17924844 |
| Taxidea taxus NCO20646 1                 | Felis catus NCO01700 2                 | 0,1792489  |
| Taxidea taxus NCO20646 1                 | Felis nigripes NCO28309 1              | 0,17924896 |
| Phoca vitulina NCO01325 1                | Helogale parvula SRR7637809 1          | 0,17924918 |
| Prionailurus bengalensis NCO28301 12     | Martes zibellina NCO11579 39           | 0,17924966 |
| Ursus thibetanus mupienensis NCO08753 2  | Mustela putorius NCO20638 4            | 0,17925353 |
| Mustela altaica NCO21751 1               | Arctodus simus NCO11116 1              | 0,17925437 |
| Panthera tigris amoyensis NCO14770 2     | Erignathus barbatus NCO08426 1         | 0,17925441 |
| Ursus arctos isabellinus 1885 2          | Mustela erminea T305 2                 | 0,17925455 |
| Catopuma badia NCO28300 1                | Canis latrans NCO08093 7               | 0,17925483 |
| Mustela nivalis T306 5                   | Arctodus simus NCO11116 1              | 0,17925623 |
| Martes melampus NCO09678 1               | Canis adustus KT448271 1               | 0,17925902 |
| Ursus thibetanus mupienensis NCO08753 2  | Genetta abyssinica MG489822 1          | 0,17925923 |
| Pusa sibirica NCO08432 2                 | Panthera leo spelaea KX258452 2        | 0,17925987 |
| Pusa caspica NCO08431 1                  | Panthera leo spelaea KX258452 2        | 0,17926043 |
| Prionailurus planiceps NCO28312 6        | Martes foina NCO20643 1                | 0,17926137 |
| Nyctereutes procyonoides NCO13700 3      | Homotherium latidens MF871702 3        | 0,17926298 |
| Lutra sumatrana NCO35810 1               | Hemigalus derbyanus MH464791 1         | 0,17926323 |
| Ursus spelaeus NCO11112 8                | Mustela frenata NCO20640 1             | 0,17926389 |
| Neophoca cinerea NCO08419 1              | Gulo gulo NCO09685 3                   | 0,17926519 |
| Paradoxurus hermaphroditus NCO39591 1    | Monachus monachus NCO44972 5           | 0,17927355 |
| Monachus monachus NCO44972 5             | Lutrogale perspicillata NCO35811 1     | 0,17927973 |
| Ursus thibetanus thibetanus NCO11118 4   | Neowison vison NCO20641 3              | 0,1792811  |
| Mustela nivalis T306 5                   | Eumetopias jubatus NCO04030 10         | 0,17928365 |
| Panthera leo NERO 19                     | Monachus schauinslandi NCO08421 1      | 0,17928986 |
| Spilogale putorius NCO10497 1            | Paradoxurus jerdoni MH464793 1         | 0,17928986 |
| Meles meles T303 3                       | Arctocepalus forsteri KT693377 17      | 0,17929617 |
| Viverricula indica NCO25296 2            | Canis mesomelas KT448280 1             | 0,17929773 |
| Neowison vison NCO20641 3                | Civettictis civetta NCO33378 1         | 0,1792984  |
| Lutrogale perspicillata NCO35811 1       | Bassaricyon neblina SRX1097850 1       | 0,17929964 |
| Mustela kathiah NCO23210 1               | Fossa fossana D350 1                   | 0,17930007 |
| Vulpes vulpes NCO08434 5                 | Pusa sibirica NCO08432 2               | 0,17930183 |
| Neophoca cinerea NCO08419 1              | Nandania binotata NCO24567 1           | 0,17930232 |
| Nandania binotata NCO24567 1             | Ailurus fulgens NCO11124 1             | 0,17930315 |
| Hemigalus derbyanus MH464791 1           | Canis latrans NCO08093 7               | 0,17930511 |
| Prionailurus rubiginosus NCO28304 2      | Lutra lutra LC050126 1                 | 0,17930844 |

|                                          |                                      |              |
|------------------------------------------|--------------------------------------|--------------|
| Vulpes ferrilata NCO27935 1              | Neofelis nebulosa NCO08450 3         | 0,1923449    |
| Panthera leo NERO 19                     | Arctocepalus gazella BK010918 1      | 0,19234863   |
| Urocyon cinereoargenteus NCO26723 2      | Eumetopias jubatus NCO04030 10       | 0,19235261   |
| Panthera leo NERO 19                     | Otaria byronia OTAB 1                | 0,19235575   |
| Urocyon cinereoargenteus NCO26723 2      | Arctocepalus pusillus NCO08417 1     | 0,19235703   |
| Vulpes vulpes NCO08434 5                 | Conepatus chinga NCO42596 1          | 0,19235995   |
| Civettictis civetta NCO33378 1           | Bassaricyon neblina SRX1097850 1     | 0,19236004   |
| Urocyon cinereoargenteus NCO26723 2      | Lutra lutra LC050126 1               | 0,19236316   |
| Urocyon cinereoargenteus NCO26723 2      | Lutra lutra LC050126 1               | 0,19236405   |
| Vulpes ferrilata NCO27935 1              | Arctocepalus gazella BK010918 1      | 0,19236373   |
| Vulpes zerdia KJ603240 1                 | Ichneumia albicauda T603 1           | 0,19236885   |
| Neophoca cinerea NCO08419 1              | Canis latrans NCO08093 7             | 0,19237073   |
| Panthera pardus NCO10641 5               | Chrysoyon brachyurus NCO24172 1      | 0,19237146   |
| Lycyon pictus NCO28427 2                 | Lontra canadensis SRR10409165 1      | 0,19237563   |
| Nyctereutes procyonoides NCO13700 3      | Cryptoprocta ferox FC13 1            | 0,19237602   |
| Hyaina hyaena NCO20669 1                 | Ailurus fulgens NCO11124 1           | 0,19237661   |
| Procyon lotor AB462046 3                 | Hyaina hyaena NCO20669 1             | 0,19237767   |
| Ursus arctos GU573491 207                | Paradoxurus hermaphroditus NCO39591  | 0,19238628   |
| Panthera pardus japonensis KJ866876      | Martes pennanti NCO20664 16          | 0,19238679   |
| Prionailurus viverrinus NCO28305 1       | Bassaricyon neblina SRX1097850 1     | 0,19238858   |
| Panthera tigris NCO10642 35              | Arctocepalus gazella BK010918 1      | 0,192389     |
| Speothos venaticus C48 2                 | Martes foina NCO20643 1              | 0,19239005   |
| Nyctereutes procyonoides NCO13700 3      | Ailuropoda melanoleuca NCO09492 5    | 0,19239157   |
| Canis lupus chanco NCO10340 4            | Arctocepalus australis MG023139 1    | 0,19239322   |
| Lynx canadensis NCO28313 1               | Ailuropoda melanoleuca NCO09492 5    | 0,19239354   |
| Panthera leo spelaea KX258452 2          | Arctocepalus australis MG023139 1    | 0,19239557   |
| Mephitis mephitis NCO20648 1             | Lutrogale perspicillata NCO35811 1   | 0,19239716   |
| Proteles cristata T393 6                 | Mustela altaica NCO21751 1           | 0,19239728   |
| Poecilogale albinucha T602 1             | Parahyaena brunnea NCO38159 15       | 0,19239768   |
| Lutrogale perspicillata NCO35811 1       | Urva javanica/auropunctata NCO06835  | 0,19240275   |
| Ursus arctos GU573486 5                  | Panthera tigris amoyensis NCO14770 2 | 0,19240364   |
| Ursus arctos GU573486 5                  | Chrysoyon brachyurus NCO24172 1      | 0,19240367   |
| Zalophus wolfebaeki SRR4431565 1         | Proteles cristata T393 6             | 0,19240528   |
| Ursus arctos AP012576 6                  | Lycyon pictus NCO28427 2             | 0,19240798   |
| Ursus americanus JX196366 3              | Urva brachyura KY117547 1            | 0,19240846   |
| Ursus spelaeus EU327344 13               | Proteles cristata T393 6             | 0,19240977   |
| Melursus ursinus NCO09970 2              | Diplogale hosei MH464790 1           | 0,19241345   |
| Otaria byronia OTAB 1                    | Canis mesomelas KT448280 1           | 0,19241668   |
| Fossa fossana D350 1                     | Urocyon cinereoargenteus NCO13700 3  | 0,19241776   |
| Odobenus rosmarus NCO04029 29            | Leopardus colocolo NCO28314 1        | 0,1924179    |
| Ursus arctos isabellinus 1885 2          | Urocyon cinereoargenteus NCO13700 3  | 0,19242138   |
| Ursus spelaeus EU327344 13               | Urva javanica/auropunctata NCO06835  | 0,192423057  |
| Canis latrans NCO08093 7                 | Arctocepalus townsendi NCO08420 1    | 0,192423135  |
| Vulpes zerdia KJ603240 1                 | Potos flavus T414 1                  | 0,19242379   |
| Vulpes zerdia KJ603240 1                 | Suricata suricatta SSM10 1           | 0,19242422   |
| Lutrogale perspicillata NCO35811 1       | Cynictis penicillata T375 1          | 0,19242462   |
| Nyctereutes procyonoides NCO13700 3      | Galidia elegans D146 1               | 0,19242559   |
| Mustela eversmanni NCO28013 1            | Galidia elegans D146 1               | 0,19242562   |
| Neophoca cinerea NCO08419 1              | Canis anthus NCO27956 2              | 0,19242801   |
| Urocyon littoralis catalinae KP129018 15 | Meles anakuma NCO09677 1             | 0,19242804   |
| Panthera uncia NCO10638 1                | Tapirus terrestris T358              | 0,192424005  |
| Vulpes corsac NCO23958 1                 | Ursus arctos pruinosus MG066703 3    | 0,192424242  |
| Ursus arctos GU573491 207                | Cynictis penicillata T375 1          | 0,192424413  |
| Panthera pardus japonensis KJ866876      | Arctocepalus townsendi NCO08420 1    | 0,192424522  |
| Otocyon megalotis SAF 1 2                | Neophoca cinerea NCO08419 1          | 0,192424634  |
| Chrysoyon brachyurus NCO24172 1          | Arctocepalus forsteri KT693377 17    | 0,192424756  |
| Suricata suricatta SSM10 1               | Chrysoyon brachyurus NCO24172 1      | 0,19242516   |
| Felis catus NCO01700 2                   | Bassaricyon neblina SRX1097850 1     | 0,192425206  |
| Odobenus rosmarus NCO04029 29            | Mustela kathiah NCO23210 1           | 0,192425288  |
| Chrysoyon brachyurus NCO24172 1          | Aonyx cinerea NCO35814 2             | 0,192425324  |
| Lycalopex sechurae KT448284 1            | Bdeogale nigripes GLC15 1            | 0,192425516  |
| Vulpes zerdia KJ603240 1                 | Melursus ursinus NCO09970 2          | 0,192425546  |
| Mephitis mephitis NCO20648 1             | Urva brachyura KY117547 1            | 0,192425583  |
| Panthera tigris amoyensis NCO14770 2     | Lontra canadensis SRR10409165 1      | 0,19242559   |
| Mungotictis decemlineata NCO27828 1      | Canis mesomelas KT448280 1           | 0,192425602  |
| Vulpes ferrilata NCO27935 1              | Melursus ursinus NCO09970 2          | 0,192425644  |
| Nyctereutes procyonoides NCO13700 3      | Galictis vittata T412 1              | 0,192425896  |
| Nasua nasua NCO20647 1                   | Helarctos malayanus NCO09968 2       | 0,192426012  |
| Mephitis mephitis NCO20648 1             | Felis nigripes NCO28309 1            | 0,192426416  |
| Ursus maritimus NCO03428 31              | Panthera tigris NCO10642 35          | 0,19242646   |
| Nyctereutes procyonoides NCO13700 3      | Mephitis mephitis NCO20648 1         | 0,192426855  |
| Galictis vittata T412 1                  | Chrysoyon brachyurus NCO24172 1      | 0,19242738   |
| Arctocepalus australis MG023139 1        | Tapirus terrestris T358              | 0,192428904  |
| Galictis vittata T412 1                  | Canis aureus KT448274 1              | 0,192429125  |
| Vulpes zerdia KJ603240 1                 | Melursus ursinus NCO08415 1          | 0,1924250022 |
| Urocyon littoralis catalinae KP129018 15 | Mungos mungo/gambianus SRR77048      | 0,19250126   |
| Vulpes ferrilata NCO27935 1              | Tremarctos ornatus NCO09969 2        | 0,19250199   |
| Urocyon spelaeus NCO11112 8              | Urocyon cinereoargenteus NCO13700 3  | 0,192502623  |
| Procyon lotor AB462049 4                 | Prionodon linsang ERR2391707 1       | 0,19250739   |
| Vulpes corsac NCO23958 1                 | Otaria byronia OTAB 1                | 0,19250935   |
| Otocyon megalotis SAF 1 2                | Arctocepalus australis MG023139 1    | 0,19251117   |
| Ursus maritimus NCO03428 31              | Attilax paludinosus T606 1           | 0,19251118   |
| Tremarctos ornatus NCO09969 2            | Panthera pardus japonensis KJ866876  | 0,19251242   |
| Paguma larvata PDD511 2                  | Otocyon megalotis SAF 1 2            | 0,19251485   |
| Neofelis nebulosa NCO08450 3             | Lycalopex sechurae KT448284 1        | 0,19251519   |
| Panthera tigris NCO10642 35              | Lontra canadensis SRR10409165 1      | 0,19252349   |
| Nasua nasua NCO20647 1                   | Melursus ursinus NCO09970 2          | 0,19252601   |
| Ursus spelaeus NCO11112 8                | Suricata suricatta SSM10 1           | 0,19252612   |
| Otocyon megalotis SAF 1 2                | Ailuropoda melanoleuca NCO09492 5    | 0,19252825   |
| Ursus arctos pruinosus MG066703 3        | Lycyon pictus NCO28427 2             | 0,19252867   |
| Poecilogale albinucha T602 1             | Odobenus rosmarus NCO04029 29        | 0,19252992   |
| Ursus maritimus NCO03428 31              | Panthera leo spelaea KX258452 2      | 0,19253305   |
| Panthera uncia NCO10638 1                | Melursus ursinus NCO09970 2          | 0,19253835   |
| Parahyaena brunnea NCO38159 15           | Mephitis mephitis NCO20648 1         | 0,19254017   |
| Zalophus californianus NCO08416 1        | Speothos venaticus C48 2             | 0,19254334   |
| Otaria byronia OTAB 1                    | Canis lupus familiaris NCO02008 1231 | 0,19254707   |
| Conepatus chinga NCO42596 1              | Bdeogale nigripes GLC15 1            | 0,19255726   |
| Canis latrans NCO08093 7                 | Arctocepalus australis MG023139 1    | 0,19256681   |
| Vulpes ferrilata NCO27935 1              | Bdeogale nigripes GLC15 1            | 0,1925673    |
| Xenogale naso C07XAR110 1                | Ailurus fulgens NCO11124 1           | 0,1925673    |
| Vulpes zerdia KJ603240 1                 | Prionodon linsang ERR2391707 1       | 0,19256802   |
| Vulpes zerdia KJ603240 1                 | Aonyx cinerea NCO35814 2             | 0,19256921   |
| Vulpes zerdia KJ603240 1                 | Arctocepalus gazella BK010918 1      | 0,19257191   |

|                                        |                                      |            |
|----------------------------------------|--------------------------------------|------------|
| Ommatophoca rossii AY377287etc 1       | Civettictis civetta GLC19 1          | 0,17930934 |
| Lutra lutra NC011358 9                 | Homotherium latidens MF871702 3      | 0,17931059 |
| Vulpes vulpes NC008434 5               | Phoca fasciata NC008428 1            | 0,17931116 |
| Paradoxurus hermaphroditus NC039591 1  | Erigonathus barbatus NC008426 1      | 0,17931174 |
| Mustela frenata NC020640 1             | Leopardus tigrinus NC028317 1        | 0,17931238 |
| Tremarctos ornatus NC009969 2          | Martes foina NC020643 1              | 0,17931242 |
| Lynx lynx NC027083 4                   | Lutra sumatrana NC035810 1           | 0,17931256 |
| Zalophus wollebaeki SRR4431565 1       | Meles leucurus NC039173 4            | 0,17931271 |
| Viverra tangalunga MH464792 1          | Leopardus wiedii NC028318 1          | 0,17931292 |
| Paguma larvata PDD511 2                | Mustela itatsi NC034330 19           | 0,17931375 |
| Mustela frenata NC020640 1             | Catopuma temminckii NC027115 41      | 0,17931402 |
| Viverricula indica NC025296 2          | Potos flavus T414 1                  | 0,17931445 |
| Ommatophoca rossii AY377287etc 1       | Felis margarita NC028308 1           | 0,17931591 |
| Ursus arctos pruinosus MG066703 3      | Potos flavus T414 1                  | 0,17931929 |
| Mustela nivalis T306 5                 | Leopardus pardalis NC028315 1        | 0,17932293 |
| Neovison vison NC020641 3              | Lynx pardinus NC028319 161           | 0,17932346 |
| Leopardus colocolo NC028314 1          | Enhydra lutris NC009692 1            | 0,17932427 |
| Arctonyx collaris NC020645 1           | Acinonyx jubatus NC005212 3          | 0,17932576 |
| Ursus thibetanus thibetanus NC011118 4 | Melogale moschata KP726273 1         | 0,17932633 |
| Helarctos malayanus NC009968 2         | Arctocepalus gazella BK010918 1      | 0,17932709 |
| Ursus thibetanus formosanus NC009331 1 | Mustela sibirica AP017394 11         | 0,17932783 |
| Leopardus colocolo NC028314 1          | Bassariscus sumichrasti SRX1099089 1 | 0,17932849 |
| Meles anakuma NC009677 1               | Genetta abyssinica MG489822 1        | 0,17932911 |
| Paradoxurus hermaphroditus NC039591 1  | Neovison vison NC020641 3            | 0,17933141 |
| Lutra sumatrana NC035810 1             | Leopardus colocolo NC028314 1        | 0,17933145 |
| Ursus thibetanus thibetanus NC011118 4 | Mustela kathiah NC023210 1           | 0,17933323 |
| Canis adustus KT448271 1               | Ailurus fulgens styani NC009691 1    | 0,17933511 |
| Phoca vitulina NC001325 1              | Galictis vittata T412 1              | 0,17933802 |
| Vulpes corsac NC023958 1               | Monachus monachus NC044972 5         | 0,17933969 |
| Zalophus wollebaeki SRR4431565 1       | Gulo gulo NC009685 3                 | 0,17934234 |
| Martes flavigula NC012141 3            | Arctocepalus australis MG023139 1    | 0,17934787 |
| Urva brachyura KY117547 1              | Halichoerus grypus NC001602 2        | 0,17934917 |
| Ommatophoca rossii AY377287etc 1       | Melursus ursinus NC009970 2          | 0,17935303 |
| Tremarctos ornatus NC009969 2          | Eumetopias jubatus NC004030 10       | 0,17935511 |
| Martes flavigula NC012141 3            | Lynx canadensis NC028313 1           | 0,17935945 |
| Tremarctos ornatus NC009969 2          | Martes melampus NC009678 1           | 0,17936295 |
| Arctocepalus gazella BK010918 1        | Ailurus fulgens styani NC009691 1    | 0,17936721 |
| Procyon lotor AB462046 3               | Callorhinus ursinus NC008415 1       | 0,17936787 |
| Ursus thibetanus mupinensis NC008753 2 | Martes flavigula NC012141 3          | 0,17936796 |
| Otaria byronia OTAB 1                  | Meles meles T303 3                   | 0,17937414 |
| Mustela altaica NC021751 1             | Callorhinus ursinus NC008415 1       | 0,17937462 |
| Viverricula indica XK891751 1          | Mustela frenata NC020640 1           | 0,17937534 |
| Phoca fasciata NC008428 1              | Lycalopex sechurae KT448284 1        | 0,17937544 |
| Spilogale putorius NC010497 1          | Hemigalus derbyanus MH464791 1       | 0,17937773 |
| Leopardus geoffroyi NC028320 1         | Enhydra lutris NC009692 1            | 0,17937881 |
| Puma yagouaroundi NC028311 1           | Ailurus fulgens styani NC009691 1    | 0,17937958 |
| Procyon lotor AB462046 3               | Ailurus fulgens styani NC009691 1    | 0,17937973 |
| Zalophus wollebaeki SRR4431565 1       | Ailurus fulgens styani NC009691 1    | 0,17937979 |
| Mustela frenata NC020640 1             | Genetta genetta T297 1               | 0,17937994 |
| Arctotherium sp NC030174 1             | Ailurus fulgens NC011124 1           | 0,17938073 |
| Viverra tangalunga MH464792 1          | Prionailurus rubiginosus NC028304 2  | 0,17938097 |
| Ursus thibetanus thibetanus NC011118 4 | Martes flavigula NC012141 3          | 0,17938131 |
| Genetta genetta T297 1                 | Arctonyx collaris NC020645 1         | 0,17938153 |
| Viverricula indica XK891751 1          | Canis anthus NC027956 2              | 0,17938226 |
| Ursus arctos GU573491 207              | Meles meles T303 3                   | 0,17938334 |
| Ursus thibetanus mupinensis NC008753 2 | Martes americana NC020642 1          | 0,17938505 |
| Martes martes T302 3                   | Leopardus pardalis T262 1            | 0,17938928 |
| Felis silvestris lybica KP202275 4     | Arctodus simus NC011116 1            | 0,17939201 |
| Mustela nigripes NC020492 1            | Mephitis mephitis NC020648 1         | 0,17939349 |
| Puma yagouaroundi NC028311 1           | Neovison vison NC020641 3            | 0,17939354 |
| Ursus thibetanus mupinensis NC008753 2 | Mustela nivalis T306 5               | 0,17939372 |
| Catopuma temminckii NC027115 41        | Arctodus simus NC011116 1            | 0,17939484 |
| Martes foina NC020643 1                | Lynx pardinus NC028319 161           | 0,17939505 |
| Leopardus pardalis NC028315 1          | Acinonyx striatus T299 1             | 0,17939548 |
| Ursus spelaeus EU327344 13             | Meles leucurus NC039173 4            | 0,17939721 |
| Zalophus californianus NC008416 1      | Mustela itatsi NC034330 19           | 0,17939846 |
| Ursus spelaeus NC011112 8              | Mustela nigripes NC020492 1          | 0,17940061 |
| Pusa hispida NC 008433 1               | Arctictis binturong T605 2           | 0,17940086 |
| Mustela eversmanni NC028013 1          | Hemigalus derbyanus MH464791 1       | 0,17940196 |
| Monachus monachus NC004972 5           | Bassariscus neblina SRX1097850 1     | 0,17940633 |
| Monachus schauinslandi NC008421 1      | Lycalopex sechurae KT448284 1        | 0,17941919 |
| Spilogale putorius NC010497 1          | Mustela nivalis T306 5               | 0,17942318 |
| Nasua nasua NC020647 1                 | Enhydra lutris NC009692 1            | 0,17942946 |
| Callorhinus ursinus NC008415 1         | Ailurus fulgens styani NC009691 1    | 0,17943107 |
| Urva brachyura KY117547 1              | Canis adustus KT448271 1             | 0,17943408 |
| Arctotherium sp NC030174 1             | Arctocepalus pusillus NC008417 1     | 0,17943734 |
| Lutra lutra LC050126 1                 | Genetta servalina NC024568 2         | 0,17943753 |
| Mustela erminea T305 2                 | Xenogale naso C07XAR110 1            | 0,17943855 |
| Taxidea taxus NC020646 1               | Fossa fossana D350 1                 | 0,17944336 |
| Prionailurus rubiginosus NC028304 2    | Meles leucurus NC039173 4            | 0,1794447  |
| Viverricula indica XK891751 1          | Potos flavus T414 1                  | 0,17944489 |
| Viverricula indica XK891745 1          | Meles leucurus NC039173 4            | 0,17944495 |
| Meles leucurus NC039173 4              | Arctotherium sp NC030174 1           | 0,1794461  |
| Lynx pardinus NC028319 161             | Callorhinus ursinus NC008415 1       | 0,17944668 |
| Prionailurus bengalensis NC028301 12   | Callorhinus ursinus NC008415 1       | 0,17944711 |
| Ursus arctos GU573491 207              | Potos flavus T414 1                  | 0,17944799 |
| Meles leucurus NC039173 4              | Leopardus guigna NC028321 1          | 0,17944837 |
| Prionailurus planiceps KY882741 4      | Mustela putorius NC020638 4          | 0,17944866 |
| Catopuma badia NC028300 1              | Arctonyx collaris NC020645 1         | 0,17944992 |
| Martes foina NC020643 1                | Arctocepalus gazella BK010918 1      | 0,17945011 |
| Phoca largha NC008430 1                | Canis latrans NC008093 7             | 0,17945066 |
| Zalophus wollebaeki SRR4431565 1       | Mustela sibirica AP017394 11         | 0,17945103 |
| Taxidea taxus NC020646 1               | Prionailurus planiceps KY882741 4    | 0,17945126 |
| Phoca largha NC008430 1                | Hemigalus parvulus SRR7637809 1      | 0,17945245 |
| Mustela kathiah NC023210 1             | Leopardus guigna NC028321 1          | 0,17945288 |
| Nasua nasua NC020647 1                 | Hydrurga leptonyx NC008425 1         | 0,17945305 |
| Pusa hispida NC 008433 1               | Galidia elegans D146 1               | 0,17945315 |
| Ursus thibetanus mupinensis NC008753 2 | Mustela sibirica AP017394 11         | 0,17945315 |
| Viverricula indica NC025296 2          | Nyctereutes procyonoides NC013700 3  | 0,17945315 |
| Pusa hispida NC 008433 1               | Canis mesomelas KT448280 1           | 0,17945488 |
| Vulpes zerda KJ603240 1                | Hydrurga leptonyx NC008425 1         | 0,17945498 |
| Cystophora cristata NC008427 1         | Crocota crocota NC020670 3           | 0,17945623 |
| Prionailurus rubiginosus NC028304 2    | Mustela altaica NC021751 1           | 0,17945623 |

|                                        |                                      |            |
|----------------------------------------|--------------------------------------|------------|
| Vulpes corsac NC023958 1               | Procyon lotor AB462049 4             | 0,19257236 |
| Panthera leo NERO 19                   | Melursus ursinus NC009970 2          | 0,19257346 |
| Paguma larvata PDD511 2                | Lontra canadensis SRR10409165 1      | 0,19257441 |
| Vulpes zerda KJ603240 1                | Cryptoprocta ferox CFC13 1           | 0,19257805 |
| Parahaena brunnea NC038159 15          | Tapirus terrestris T358              | 0,19258111 |
| Ursus thibetanus mupinensis NC008753 2 | Urva brachyura KY117547 1            | 0,19258125 |
| Panthera onca NC022842 1               | Conepatus chinga NC042596 1          | 0,19258265 |
| Nasua nasua NC020647 1                 | Leopardus pardalis NC028315 1        | 0,19258505 |
| Salanoia concolor D378 1               | Leopardus pardalis NC028315 1        | 0,19258718 |
| Otocyon megalotis SAF 1 2              | Cryptoprocta ferox CFC13 1           | 0,19258861 |
| Suricata suricatta SSM10 1             | Ailuropoda melanoleuca NC009492 5    | 0,19258897 |
| Tremarctos ornatus NC009969 2          | Panthera tigris NC010642 35          | 0,19259151 |
| Panthera tigris NC010642 35            | Nyctereutes procyonoides NC013700 3  | 0,19259179 |
| Galidia elegans D146 1                 | Galictis vittata T412 1              | 0,19259524 |
| Galidia elegans D146 1                 | Chrysocyon brachyurus NC024172 1     | 0,19259711 |
| Ursus arctos EU497665 29               | Chrysocyon brachyurus NC024172 1     | 0,19259919 |
| Ursus arctos EU497665 29               | Panthera tigris amoyensis NC014770 2 | 0,19259922 |
| Ursus maritimus GU573488 Svalbard      | Panthera leo spelaeus XK258452 2     | 0,19260037 |
| Panthera pardus japonensis KJ866876    | Melursus ursinus NC009970 2          | 0,19260588 |
| Nephoca cinerea NC008419 1             | Canis lupus familiaris NC002008 1231 | 0,19260749 |
| Canis mesomelas KT448280 1             | Arctocepalus forsteri KT693377 17    | 0,19260752 |
| Ursus arctos AP012576 6                | Felis nigripes NC028309 1            | 0,19260874 |
| Vulpes ferrillata NC027935 1           | Ursus americanus JX196366 3          | 0,19261102 |
| Ursus arctos EU497665 29               | Cuon alpinus NC013445 3              | 0,19262309 |
| Urva javanica T413 1                   | Conepatus chinga NC042596 1          | 0,19262309 |
| Vulpes vulpes NC008434 5               | Arctocepalus townsendi NC008420 1    | 0,19263317 |
| Lontra canadensis SRR10409165 1        | Canis mesomelas KT448280 1           | 0,19263507 |
| Lycalopex sechurae KT448284 1          | Galidictis fasciata DM333 1          | 0,19263723 |
| Salanoia concolor D378 1               | Tapirus terrestris T358              | 0,19264132 |
| Vulpes lagopus NC026529 3              | Otaria byronia OTAB 1                | 0,19264245 |
| Phoca vitulina NC001325 1              | Mellivora capensis T370 1            | 0,19264297 |
| Panthera uncia KP202269 1              | Meles anakuma NC009677 1             | 0,19264321 |
| Vulpes lagopus NC026529 3              | Ursus maritimus NC030428 31          | 0,19264388 |
| Otocyon megalotis SAF 1 2              | Arctocepalus townsendi NC008420 1    | 0,19264527 |
| Lontra canadensis SRR10409165 1        | Genetta genetta T297 1               | 0,1926457  |
| Ursus arctos isabellinus 1885 2        | Xenogale naso C07XAR110 1            | 0,19264607 |
| Speothos venaticus C48 2               | Melogale moschata W0735A 1           | 0,19264622 |
| Ursus arctos EU497665 29               | Atlix paludinosus T606 1             | 0,1926465  |
| Neofelis nebulosa NC008450 3           | Canis lupus familiaris NC002008 1231 | 0,19265352 |
| Prionodon pardiculus NC024569 2        | Arctotherium sp NC030174 1           | 0,19265409 |
| Ursus maritimus GU573488 Svalbard      | Paradoxurus hermaphroditus NC039591  | 0,19265573 |
| Panthera tigris NC010642 35            | Mustela itatsi NC034330 19           | 0,19265583 |
| Ursus arctos isabellinus 1885 2        | Parahaena brunnea NC038159 15        | 0,19265814 |
| Ursus thibetanus laniger MH281753 2    | Urva brachyura KY117547 1            | 0,19265904 |
| Poecilogale albinucha T602 1           | Hyaena hyaena NC020669 1             | 0,19266042 |
| Ursus arctos AP012576 6                | Bdeogale nigripes GLC15 1            | 0,19266251 |
| Ursus arctos isabellinus 1885 2        | Panthera tigris NC010642 35          | 0,1926658  |
| Ursus arctos pruinosus MG066703 3      | Panthera onca NC022842 1             | 0,19266923 |
| Cryptoprocta ferox CFC13 1             | Canis lupus familiaris NC002008 1231 | 0,19267949 |
| Vulpes zerda KJ603240 1                | Canis lupus familiaris JX196366 3    | 0,1926813  |
| Neofelis nebulosa NC008450 3           | Arctocepalus pusillus NC008417 1     | 0,19268847 |
| Mellivora capensis T370 1              | Bassaricyon neblina SRX1097850 1     | 0,1926941  |
| Urocyon cinereoargenteus NC026723 2    | Eupleres goudotii D128 1             | 0,19269949 |
| Vulpes lagopus NC026529 3              | Lontra canadensis SRR10409165 1      | 0,19270031 |
| Nasua nasua NC020647 1                 | Mungos mungo/gambianus SRR77048      | 0,19270319 |
| Vulpes lagopus NC026529 3              | Aonyx cinerea NC035814 2             | 0,19270332 |
| Mustela sibirica AP017394 11           | Cynogale bennetti KY117544 1         | 0,19270431 |
| Neofelis nebulosa NC008450 3           | Helarctos malayanus NC009968 2       | 0,19270577 |
| Vulpes zerda KJ603240 1                | Nephoca cinerea NC008419 1           | 0,19270654 |
| Vulpes zerda KJ603240 1                | Procyon lotor AB462046 3             | 0,19270697 |
| Vulpes zerda KJ603240 1                | Arctocepalus pusillus NC008417 1     | 0,19270721 |
| Arctocepalus pusillus NC008417 1       | Tapirus terrestris T358              | 0,19270907 |
| Vulpes lagopus NC026529 3              | Ursus maritimus GU573488 Svalbard    | 0,19271122 |
| Panthera pardus NC010641 5             | Melursus ursinus NC009970 2          | 0,19271395 |
| Lutrogale perspicillata NC035811 1     | Genetta genetta T297 1               | 0,19271599 |
| Viverricula indica XK891745 1          | Bassaricyon neblina SRX1097850 1     | 0,19271645 |
| Ursus spelaeus EU327344 13             | Cynogale bennetti KY117544 1         | 0,19271882 |
| Procyon lotor AB462049 4               | Panthera uncia NC010638 1            | 0,19272064 |
| Puma concolor NC016470 22              | Nasua nasua NC020647 1               | 0,1927207  |
| Prionailurus bengalensis NC028301 12   | Nasua nasua NC020647 1               | 0,19272131 |
| Prionailurus planiceps NC028312 6      | Bassaricyon neblina SRX1097850 1     | 0,19272175 |
| Prionailurus viverrinus NC028305 1     | Nasua nasua NC020647 1               | 0,19272207 |
| Phocarcos hookeri NC008418 1           | Mephitis mephitis NC020648 1         | 0,19272584 |
| Galictis vittata T412 1                | Canis latrans NC008093 7             | 0,19272797 |
| Martes flavigula NC012141 3            | Cynogale bennetti KY117544 1         | 0,19272739 |
| Canis lupus familiaris NC002008 1231   | Arctocepalus australis MG023139 1    | 0,19273669 |
| Poecilogale albinucha T602 1           | Crocota crocota NC020670 3           | 0,19274054 |
| Urocyon cinereoargenteus NC026723 2    | Gulo gulo NC009685 3                 | 0,19275172 |
| Panthera pardus NC010641 5             | Arctocepalus townsendi NC008420 1    | 0,19275388 |
| Spilogale putorius NC010497 1          | Puma concolor NC016470 22            | 0,192756   |
| Ursus maritimus NC030428 31            | Cuon alpinus NC013445 3              | 0,19275779 |
| Spilogale putorius NC010497 1          | Fossa fossana D350 1                 | 0,1927581  |
| Ursus arctos GU573488 5                | Cuon alpinus NC013445 3              | 0,19276419 |
| Tremarctos ornatus NC009969 2          | Canis mesomelas KT448280 1           | 0,19276856 |
| Vulpes ferrillata NC027935 1           | Mungos mungo MMC7 1                  | 0,19276978 |
| Vulpes zerda KJ603240 1                | Cynictis penicillata T375 1          | 0,19277035 |
| Urocyon littoralis catalinae KP129018  | Melogale moschata W0735A 1           | 0,19277076 |
| Urocyon cinereoargenteus NC026723 2    | Lutra sumatrana NC035810 1           | 0,19277212 |
| Panthera pardus japonensis KJ866876    | Martes zibellina NC011579 39         | 0,19278319 |
| Civettictis civetta GLC19 1            | Bassaricyon neblina SRX1097850 1     | 0,19278343 |
| Urocyon littoralis catalinae KP129018  | Leopardus tigrinus NC028317 1        | 0,19278432 |
| Viverra zibetha T609 1                 | Bassaricyon neblina SRX1097850 1     | 0,19278443 |
| Nasua nasua NC020647 1                 | Lynx canadensis NC028313 1           | 0,19278477 |
| Zalophus wollebaeki SRR4431565 1       | Prionodon linsang ERR2391707 1       | 0,19278634 |
| Panthera tigris amoyensis NC014770 2   | Arctocepalus gazella BK010918 1      | 0,19279312 |
| Speothos venaticus C48 2               | Panthera onca KP202264 2             | 0,19279747 |
| Ursus thibetanus laniger MH281753 2    | Nasua nasua NC020647 1               | 0,19279513 |
| Ursus spelaeus NC011112 8              | Nasua nasua NC020647 1               | 0,19279841 |
| Ursus spelaeus EU327344 13             | Nasua nasua NC020647 1               | 0,19279847 |
| Ursus arctos pruinosus MG066703 3      | Chrysocyon brachyurus NC024172 1     | 0,19280111 |
| Ursus maritimus GU573488 Svalbard      | Chrysocyon brachyurus NC024172 1     | 0,19280121 |
| Ursus spelaeus EU327344 13             | Panthera uncia NC010638 1            | 0,19280286 |
| Cryptoprocta ferox CFC13 1             | Canis lupus chanco NC010340 4        | 0,19280736 |

|                                        |                                      |            |
|----------------------------------------|--------------------------------------|------------|
| Melogale moschata NC020644 1           | Leopardus wiedii NC028318 1          | 0,17945683 |
| Ursus spelaeus NC011112 8              | Taxidea taxus NC020646 1             | 0,17945737 |
| Panthera uncia KP202269 1              | Monachus schauinslandi NC008421 1    | 0,17945911 |
| Leopardus wiedii NC028318 1            | Bassariscus sumichrasti SRX1099089 1 | 0,17945923 |
| Procyon lotor AB462046 3               | Hemigalus derbyanus MH464791 1       | 0,17946179 |
| Monachus schauinslandi NC008421 1      | Ichneumia albicauda T603 1           | 0,17946211 |
| Prionailurus bengalensis CKM45 20      | Mustela nivalis T306 5               | 0,1794626  |
| Martes melampus NC009678 1             | Acinonyx jubatus NC005212 3          | 0,17946339 |
| Mirounga angustirostris SRR10331586 1  | Ichneumia albicauda T603 1           | 0,17946383 |
| Ursus thibetanus formosanus NC009331 1 | Mustela eversmannii NC028013 1       | 0,17946462 |
| Prionailurus bengalensis CKM45 20      | Neovison vison NC020641 3            | 0,17946482 |
| Ursus thibetanus laniger MH281753 2    | Mustela eversmannii NC028013 1       | 0,1794657  |
| Pusa sibirica NC008432 2               | Canis lupus familiaris NC002008 1231 | 0,17946999 |
| Mustela itatsi NC034330 19             | Homotherium latidens MF871702 3      | 0,17947014 |
| Monachus monachus NC044972 5           | Bdeogale nigripes GLC15 1            | 0,17947319 |
| Ommatophoca rossii AY377287etc 1       | Canis latrans NC008093 7             | 0,17947757 |
| Panthera onca NC022842 1               | Ommatophoca rossii AY377287etc 1     | 0,17947862 |
| Monachus monachus NC044972 5           | Ichneumia albicauda T603 1           | 0,1794787  |
| Pusa hispida NC 008433 1               | Canis lupus chanco NC010340 4        | 0,1794897  |
| Ursus thibetanus laniger MH281753 2    | Hemigalus derbyanus MH464791 1       | 0,17949122 |
| Puma yagouaroundi NC028311 1           | Canis lupus chanco NC010340 4        | 0,17949401 |
| Martes melampus NC009678 1             | Arctocepalus forsteri KT693377 17    | 0,1794991  |
| Arctocepalus forsteri KT693377 17      | Ailurus fulgens styani NC009691 1    | 0,17950052 |
| Mustela sibirica NC020637 6            | Crossarchus platycephalus C7R66 1    | 0,17950124 |
| Ommatophoca rossii AY377287etc 1       | Galerella sanguinea T378 1           | 0,17950207 |
| Mustela nigripes NC024942 1            | Canis aureus KT448274 1              | 0,17950709 |
| Nyctereutes procyonoides NC013700 3    | Mirounga leonina NC008422 1          | 0,17950791 |
| Neophoca cinerea NC008419 1            | Martes martes T302 3                 | 0,17950901 |
| Viverra zibetha T609 1                 | Meles leucurus NC039173 4            | 0,17951222 |
| Mirounga angustirostris SRR10331586 1  | Cynogale bennetti KY117544 1         | 0,17951372 |
| Viverra tangalunga MH464792 1          | Lynx canadensis NC028313 1           | 0,17951377 |
| Mustela sibirica AP017394 11           | Lynx canadensis NC028313 1           | 0,17951415 |
| Martes melampus NC009678 1             | Leopardus wiedii NC028318 1          | 0,17951526 |
| Viverra zibetha T609 1                 | Viverra tangalunga MH464792 1        | 0,17951596 |
| Prionailurus planiceps NC028312 6      | Canis adustus KT448271 1             | 0,17951679 |
| Arctodus simus NC011116 1              | Ailurus fulgens NC011124 1           | 0,17952055 |
| Mirounga angustirostris SRR10331586 1  | Canis anthus NC027956 2              | 0,17952195 |
| Taxidea taxus NC020646 1               | Helarctos malayanus NC009968 2       | 0,17952502 |
| Prionailurus planiceps NC028312 6      | Neovison vison NC020641 3            | 0,17952716 |
| Ursus spelaeus NC011112 8              | Nandinia binotata NC024567 1         | 0,17952971 |
| Ursus thibetanus formosanus NC009331 1 | Martes americana NC020642 1          | 0,1795298  |
| Ursus thibetanus laniger MH281753 2    | Mustela sibirica AP017394 11         | 0,17953096 |
| Ursus thibetanus thibetanus NC011118 4 | Martes americana NC020642 1          | 0,17953295 |
| Phoca fasciata NC008428 1              | Crocota crocata NC020670 3           | 0,17953318 |
| Mustela frenata NC020640 1             | Helarctos malayanus NC009968 2       | 0,1795335  |
| Panthera leo spelaea XX258452 2        | Monachus schauinslandi NC008421 1    | 0,1795354  |
| Ursus thibetanus formosanus NC009331 1 | Mustela nivalis T306 5               | 0,17953758 |
| Phoca largha NC008430 1                | Panthera leo spelaea XX258452 2      | 0,17954758 |
| Melogale moschata NC020644 1           | Hemigalus derbyanus MH464791 1       | 0,17955203 |
| Otaria byronia OTAB 1                  | Martes flavigula NC012141 3          | 0,17955254 |
| Monachus monachus NC044972 5           | Hyaena hyaena NC020669 1             | 0,17955445 |
| Panthera onca KP202264 2               | Ommatophoca rossii AY377287etc 1     | 0,17955483 |
| Nasua nasua NC020647 1                 | Meles leucurus NC039173 4            | 0,17956328 |
| Lutra sumatrana NC035810 1             | Arctocepalus forsteri KT693377 17    | 0,1795674  |
| Mustela nigripes NC024942 1            | Fossa fossana D350 1                 | 0,17956959 |
| Lutra sumatrana NC035810 1             | Homotherium latidens MF871702 3      | 0,17956972 |
| Martes zibellina NC011579 39           | Arctocepalus forsteri KT693377 17    | 0,17957054 |
| Erignathus barbatus NC008426 1         | Canis mesomelas KT448280 1           | 0,17957136 |
| Mustela frenata NC020640 1             | Fossa fossana D350 1                 | 0,17957166 |
| Nasua nasua NC020647 1                 | Leptonyx chotes weddellii NC008424 1 | 0,17957219 |
| Neovison vison NC020641 3              | Nasua nasua NC020647 1               | 0,17957452 |
| Meles leucurus NC039173 4              | Lynx canadensis NC028313 1           | 0,17957695 |
| Puma concolor NC016470 22              | Lutra lutra LC050126 1               | 0,17957772 |
| Lynx canadensis NC028313 1             | Arctonyx collaris NC020645 1         | 0,17957859 |
| Lutra lutra NC011358 9                 | Leopardus wiedii NC028318 1          | 0,1795797  |
| Halichoerus grypus NC001602 2          | Galictis vittata T412 1              | 0,17958006 |
| Meles meles T303 3                     | Genetta servalina NC024568 2         | 0,17958029 |
| Mustela kathiah NC023210 1             | Felis silvestris lybica KP202275 4   | 0,17958219 |
| Mustela putorius NC020638 4            | Leopardus pardalis T262 1            | 0,17958248 |
| Ursus arctos isabellinus 18B5 2        | Nandinia binotata NC024567 1         | 0,17958312 |
| Mustela itatsi NC034330 19             | Genetta servalina NC024568 2         | 0,1795835  |
| Lutra sumatrana NC035810 1             | Leopardus wiedii NC028318 1          | 0,17958352 |
| Viverricula indica KX891745 1          | Ailurus fulgens styani NC009691 1    | 0,17958425 |
| Melogale moschata KP26273 1            | Leopardus jacobita NC028322 1        | 0,17958482 |
| Suricata suricatta SSM10 1             | Phoca largha NC008430 1              | 0,1795858  |
| Paradoxurus hermaphroditus NLNC 1      | Canis latrans NC008093 7             | 0,17958611 |
| Paradoxurus jerdoni MH464793 1         | Canis latrans NC008093 7             | 0,17958623 |
| Martes foina NC020643 1                | Conepatus chinga NC042596 1          | 0,17958672 |
| Martes foina NC020643 1                | Galidictis fasciata DM333 1          | 0,17958787 |
| Halichoerus grypus NC001602 2          | Canis lupus familiaris NC002008 1231 | 0,17958869 |
| Melogale moschata NC020644 1           | Leopardus pardalis T262 1            | 0,17959076 |
| Ommatophoca rossii AY377287etc 1       | Attilax paludinosus T606 1           | 0,1795909  |
| Bassariscus sumichrasti SRX1099089 1   | Arctodus simus NC011116 1            | 0,17959093 |
| Prionailurus bengalensis NC028301 12   | Canis aureus KT448274 1              | 0,17959218 |
| Cystophora cristata NC008427 1         | Arctictis binturong T605 2           | 0,17959632 |
| Speothos venaticus C48 2               | Lobodon carinophaga NC008423 1       | 0,17959663 |
| Ursus semitorquatus MH464789 1         | Canis adustus KT448271 1             | 0,17959753 |
| Pusa hispida NC 008433 1               | Chrysocyon brachyurus NC024172 1     | 0,1795977  |
| Prionailurus viverrinus NC028305 1     | Martes foina NC020643 1              | 0,17959991 |
| Tremarctos ornatus NC009969 2          | Homotherium latidens MF871702 3      | 0,17960027 |
| Paradoxurus hermaphroditus NLNC 1      | Bassariscus sumichrasti SRX1099089 1 | 0,17960101 |
| Phoca largha NC008430 1                | Crocota crocata NC020670 3           | 0,17960559 |
| Monachus monachus NC044972 5           | Canis anthus NC027956 2              | 0,17960954 |
| Nyctereutes procyonoides NC013700 3    | Monachus monachus NC044972 5         | 0,17961213 |
| Canis adustus KT448271 1               | Ailuropoda melanoleuca NC009492 5    | 0,17961374 |
| Spilogale putorius NC010497 1          | Phoca largha NC008430 1              | 0,17961562 |
| Neofelis nebulosa NC008450 3           | Erignathus barbatus NC008426 1       | 0,17961721 |
| Viverra zibetha T609 1                 | Gulo gulo NC009685 3                 | 0,17961812 |
| Martes flavigula NC012141 3            | Lynx lynx NC027083 4                 | 0,1796293  |
| Viverra zibetha T609 1                 | Ommatophoca rossii AY377287etc 1     | 0,17963983 |
| Canis adustus KT448271 1               | Bdeogale nigripes GLC15 1            | 0,17964055 |
| Otaria byronia OTAB 1                  | Meles leucurus NC039173 4            | 0,17964406 |
| Otaria byronia OTAB 1                  | Mustela sibirica NC020637 6          | 0,17964475 |

|                                       |                                       |            |
|---------------------------------------|---------------------------------------|------------|
| Spilogale putorius NC010497 1         | Ursus arctos GUS73486 5               | 0,19281399 |
| Ursus arctos GUS73486 5               | Odobenus rosmarus NC004029 29         | 0,19282046 |
| Neofelis nebulosa NC008450 3          | Canis latrans NC008093 7              | 0,19282155 |
| Odobenus rosmarus NC004029 29         | Ailuropoda melanoleuca NC009492 5     | 0,19282161 |
| Ursus semitorquatus MH464789 1        | Cuon alpinus NC013445 3               | 0,19282243 |
| Suricata suricatta SSM10 1            | Conepatus chinga NC042596 1           | 0,19282638 |
| Viverra tangalunga MH464792 1         | Tapirus terrestris T358               | 0,19282752 |
| Helarctos malayanus NC009968 2        | Cuon alpinus NC013445 3               | 0,19283918 |
| Canis lupus chanco NC010340 4         | Arctocepalus forsteri NC004023 28     | 0,1928412  |
| Otocyon megalotis SAF 1 2             | Ailurus fulgens styani NC009691 1     | 0,19284476 |
| Vulpes ferrilata NC027935 1           | Paradoxurus hermaphroditus NC03959    | 0,19284554 |
| Lutrogale perspicillata NC035811 1    | Conepatus chinga NC042596 1           | 0,1928461  |
| Urocyon lagopus NC026529 3            | Mustela nivalis T306 5                | 0,19284879 |
| Zalophus wollebaeki SRR4431565 1      | Cynogale bennetti KY117544 1          | 0,19284883 |
| Paradoxurus hermaphroditus NLNC 1     | Otocyon megalotis SAF 1 2             | 0,19285096 |
| Odobenus rosmarus NC004029 29         | Canis adustus KT448271 1              | 0,19285156 |
| Poecilogale albinucha T602 1          | Galidia elegans D146 1                | 0,19285251 |
| Urocyon cinereoargenteus NC026723 2   | Felis chaus NC028307 1                | 0,1928535  |
| Nasua nasua NC020647 1                | Leopardus wiedii NC028318 1           | 0,19285622 |
| Ursus maritimus NC003428 31           | Paradoxurus hermaphroditus NC03959    | 0,19285771 |
| Vulpes zerdia K1603240 1              | Ursus spelaeus NC011112 8             | 0,19285969 |
| Ursus arctos GUS73486 5               | Paradoxurus hermaphroditus NC03959    | 0,19286413 |
| Urocyon cinereoargenteus NC026723 2   | Arctictis binturong T605 2            | 0,19286489 |
| Panthera onca KP202264 2              | Ailuropoda melanoleuca NC009492 5     | 0,19286625 |
| Nasua nasua NC020647 1                | Mephitis mephitis NC020648 1          | 0,19287041 |
| Ursus thibetanus laniger MH281753 2   | Otocyon megalotis SAF 1 2             | 0,19287086 |
| Ursus spelaeus EU327344 13            | Panthera leo spelaea XX258452 2       | 0,19287159 |
| Urocyon megalotis SAF 1 2             | Melurus ursinus NC009970 2            | 0,19287524 |
| Canis aureus KT448274 1               | Arctocepalus towmsendii NC008420 1    | 0,19287724 |
| Panthera leo NERO 19                  | Arctocepalus forsteri NC004023 28     | 0,19287266 |
| Parahyaena brunnea NC038159 15        | Lycalopex securae KT448284 1          | 0,19287494 |
| Panthera onca NC022842 1              | Ailuropoda melanoleuca NC009492 5     | 0,19287698 |
| Ursus maritimus GUS73488 Svalbard     | Odobenus rosmarus NC004029 29         | 0,19288091 |
| Ursus thibetanus laniger MH281753 2   | Panthera tigris amoyensis NC014770 2  | 0,19288112 |
| Ursus arctos pruinosus MG066703 3     | Odobenus rosmarus NC004029 29         | 0,19288117 |
| Panthera leo NERO 19                  | Arctocepalus towmsendii NC008420 1    | 0,1928847  |
| Ursus americanus JX196366 3           | Galidia elegans D146 1                | 0,19288488 |
| Neofelis nebulosa NC008450 3          | Martes zibellina NC011579 39          | 0,19288495 |
| Spilogale putorius NC010497 1         | Otocolobus manul NC028323 1           | 0,19289261 |
| Urocyon littoralis catalinae KP129018 | Lutra lutra LC050126 1                | 0,19290274 |
| Prionodon pardicolor NC024569 2       | Eumetopias jubatus NC004030 10        | 0,19290619 |
| Vulpes ferrilata NC027935 1           | Arctocepalus pusillus NC008417 1      | 0,19290975 |
| Panthera onca NC010638 1              | Meles anakuma NC009677 1              | 0,1929125  |
| Vulpes corsac NC023958 1              | Ursus arctos GUS73491 207             | 0,19291362 |
| Vulpes vulpes NC008434 5              | Hyaena hyaena NC020669 1              | 0,19291389 |
| Odobenus rosmarus NC004029 29         | Chrotogale owstoni T607 1             | 0,19291404 |
| Vulpes ferrilata NC027935 1           | Lynx tigris tigris T378 1             | 0,19291465 |
| Speothos venaticus C48 2              | Ursus semitorquatus MH464789 1        | 0,19291635 |
| Mephitis mephitis NC020648 1          | Cuon alpinus NC013445 3               | 0,19291727 |
| Lontra canadensis SRR10409165 1       | Crocota crocata NC020670 3            | 0,19291793 |
| Viverricula indica KX891751 1         | Bassariscus neblina SRX1097850 1      | 0,19291873 |
| Prionodon pardicolor NC024569 2       | Arctocepalus forsteri KT693377 17     | 0,19291911 |
| Vulpes lagopus NC026529 3             | Ursus arctos GUS73486 5               | 0,19291916 |
| Nasua nasua NC020647 1                | Lynx pardinus NC028319 161            | 0,19292085 |
| Ursus arctos pruinosus MG066703 3     | Cynictis penicillata T375 1           | 0,19292213 |
| Ursus arctos pruinosus MG066703 3     | Attilax paludinosus T606 1            | 0,19292256 |
| Pardofelis marmorata NLN3 2           | Bassariscus neblina SRX1097850 1      | 0,1929239  |
| Prionodon pardicolor NC024569 2       | Phocarcus hookeri NC008418 1          | 0,19292422 |
| Prionodon linsang ERR2391707 1        | Galictis vittata T412 1               | 0,19292581 |
| Vulpes lagopus NC026529 3             | Melurus ursinus NC009970 2            | 0,19292723 |
| Prionailurus bengalensis CKM45 20     | Nasua nasua NC020647 1                | 0,19292729 |
| Vulpes lagopus NC026529 3             | Ictonyx striatus T299 1               | 0,19293243 |
| Ursus arctos AP012576 6               | Attilax paludinosus T606 1            | 0,19293249 |
| Vulpes ferrilata NC027935 1           | Diplogale hosi MH464790 1             | 0,19293293 |
| Zalophus californianus NC008416 1     | Cynogale bennetti KY117544 1          | 0,19293535 |
| Speothos venaticus C48 2              | Panthera tigris NC010642 35           | 0,1929381  |
| Ursus arctos GUS73486 5               | Panthera tigris NC010642 35           | 0,19294241 |
| Ursus arctos AP012576 6               | Otocolobus manul NC028323 1           | 0,19294684 |
| Vulpes lagopus NC026529 3             | Spilogale putorius NC010497 1         | 0,19294959 |
| Neofelis nebulosa NC008450 3          | Ailurus fulgens NC011124 1            | 0,19295032 |
| Speothos venaticus C48 2              | Ursu javanica/auroripunctata NC006835 | 0,19295336 |
| Urocyon littoralis catalinae KP129018 | Gulo gulo NC009685 3                  | 0,19295357 |
| Panthera leo spelaea XX258452 2       | Galictis vittata T412 1               | 0,19295469 |
| Cuon alpinus NC013445 3               | Conepatus chinga NC042596 1           | 0,19296031 |
| Lutrogale perspicillata NC035811 1    | Hemigalus derbyanus MH464791 1        | 0,1929688  |
| Urocyon littoralis catalinae KP129018 | Eupleres goudotii D128 1              | 0,19296883 |
| Vulpes vulpes NC008434 5              | Meles leucurus NC039173 4             | 0,19297026 |
| Vulpes vulpes NC008434 5              | Suricata suricatta SSM10 1            | 0,19297118 |
| Nasua nasua NC020647 1                | Fossa fossana D350 1                  | 0,19297157 |
| Vulpes zerdia K1603240 1              | Ursu javanica T413 1                  | 0,19297221 |
| Urocyon cinereoargenteus NC026723 2   | Mungos mungo/gambianus SRR77048       | 0,19297262 |
| Melogale moschata V0735A 1            | Cynogale bennetti KY117544 1          | 0,19297282 |
| Vulpes zerdia K1603240 1              | Bassariscus sumichrasti SRX1099089 1  | 0,19297364 |
| Urocyon littoralis catalinae KP129018 | Lutra sumatrana NC035810 1            | 0,19297417 |
| Panthera pardus japonensis KJ866876   | Conepatus chinga NC042596 1           | 0,19297424 |
| Neofelis nebulosa NC008450 3          | Canis lupus chanco NC010340 4         | 0,19298559 |
| Urocyon cinereoargenteus NC026723 2   | Profelis aurata NC028299 1            | 0,19298854 |
| Proteles cristata T393 6              | Arctocepalus australis MG023139 1     | 0,1929929  |
| Ursus arctos GUS73491 207             | Chrysocyon brachyurus NC024172 1      | 0,19300334 |
| Zalophus californianus NC008416 1     | Urocyon littoralis catalinae KP129018 | 0,19300443 |
| Ursus arctos GUS73491 207             | Panthera onca NC022842 1              | 0,19300561 |
| Panthera leo spelaea XX258452 2       | Otaria byronia OTAB 1                 | 0,19300719 |
| Ursus arctos AP012576 6               | Paradoxurus hermaphroditus NC03959    | 0,19300865 |
| Neophoca cinerea NC008419 1           | Lycalopex securae KT448284 1          | 0,19301277 |
| Ursus americanus JX196366 3           | Cynogale bennetti KY117544 1          | 0,19301648 |
| Ursus americanus JX196366 3           | Panthera uncia NC010638 1             | 0,19303095 |
| Urocyon littoralis catalinae KP129018 | Lutra lutra NC01358 9                 | 0,1930365  |
| Vulpes corsac NC023958 1              | Arctocepalus australis MG023139 1     | 0,19303797 |
| Ursus americanus JX196366 3           | Panthera tigris NC010642 35           | 0,19303805 |
| Ursus americanus JX196366 3           | Panthera tigris amoyensis NC014770 2  | 0,19303811 |
| Chrysocyon brachyurus NC024172 1      | Arctocepalus forsteri NC004023 28     | 0,19303882 |
| Vulpes ferrilata NC027935 1           | Bassariscus sumichrasti SRX1099089 1  | 0,19304472 |
| Ursus arctos isabellinus 18B5 2       | Eupleres goudotii D128 1              | 0,19304703 |

|                                        |                                      |            |
|----------------------------------------|--------------------------------------|------------|
| Otaria byronia OTAB 1                  | Mustela itatsi NC034330 19           | 0,17964609 |
| Arctocepalus pusillus NC008417 1       | Ailurus fulgens styani NC009691 1    | 0,17964685 |
| Ursus thibetanus formosanus NC009331 1 | Martes flavigula NC012141 3          | 0,17964755 |
| Viverricula indica XK891751 1          | Meles meles T303 3                   | 0,17964788 |
| Ursus thibetanus formosanus NC009331 1 | Eumetopias jubatus NC004030 10       | 0,17964852 |
| Mustela itatsi NC034330 19             | Lynx pardinus NC028319 161           | 0,17964952 |
| Martes foina NC020643 1                | Arctocepalus australis MG023139 1    | 0,17965011 |
| Prionailurus planiceps NC028312 6      | Mustela nigripes NC024942 1          | 0,17965046 |
| Puma yagouaroundi NC028311 1           | Mustela putorius NC020638 4          | 0,17965071 |
| Prionailurus rubiginosus NC028304 2    | Mustela itatsi NC034330 19           | 0,17965083 |
| Prionailurus bengalensis NC028301 12   | Lycalopex securus KT448284 1         | 0,1796525  |
| Viverricula indica NC025296 2          | Viverra tangalunga MH464792 1        | 0,17965262 |
| Mustela nigripes NC024942 1            | Leopardus geoffroyi NC028320 1       | 0,17965318 |
| Panthera onca NC022842 1               | Canis adustus KT448271 1             | 0,17965423 |
| Paguma larvata PDD511 2                | Monachus schauinslandi NC008421 1    | 0,17965645 |
| Pusa hispida NC 008433 1               | Canis aureus KT448274 1              | 0,17965668 |
| Hemigalus derbyanus MH464791 1         | Bassariscus sumichrasti SRX1099089 1 | 0,17965706 |
| Ursus arctos GU573486 5                | Nandinia binotata NC024567 1         | 0,17965712 |
| Viverra zibetha T609 1                 | Bassariscus sumichrasti SRX1099089 1 | 0,17966133 |
| Prionailurus rubiginosus NC028304 2    | Neovison vison NC020641 3            | 0,17966257 |
| Prionailurus bengalensis CKM45 20      | Martes martes T302 3                 | 0,1796643  |
| Lycan pictus NC028427 2                | Felis silvestris lybica KP202275 4   | 0,17966607 |
| Nandinia binotata NC024567 1           | Lycalopex securus KT448284 1         | 0,17966826 |
| Ommatophoca rossii AY377287etc 1       | Conepatus chinga NC042596 1          | 0,17966838 |
| Tremarctos ornatus NC009969 2          | Smilodon populator MF871700 1        | 0,17967039 |
| Mustela putorius NC020638 4            | Canis adustus KT448271 1             | 0,17967808 |
| Phoca groenlandica NC008429 54         | Canis lupus familiaris NC002008 1231 | 0,17968151 |
| Smilodon populator MF871700 1          | Meles leucurus NC039173 4            | 0,17968592 |
| Mirounga angustirostris SRR10331586 1  | Lycalopex securus KT448284 1         | 0,1796892  |
| Prionailurus rubiginosus NC028304 2    | Martes flavigula NC012141 3          | 0,17969164 |
| Ursus americanus JX196366 3            | Mustela erminea T305 2               | 0,17969376 |
| Monachus schauinslandi NC008421 1      | Canis mesomelas KT448280 1           | 0,17969677 |
| Erigonatus barbatus NC008426 1         | Cynogale bennetti KY117544 1         | 0,17969716 |
| Smilodon populator MF871700 1          | Mustela kathiah NC023210 1           | 0,17969757 |
| Mustela eversmanni NC028013 1          | Callorhinus ursinus NC008415 1       | 0,17970027 |
| Paguma larvata PDD511 2                | Halichoerus grypus NC001602 2        | 0,17970099 |
| Meles leucurus NC039173 4              | Fossa fossana D350 1                 | 0,17970173 |
| Procyon lotor AB462049 4               | Hemigalus derbyanus MH464791 1       | 0,17970243 |
| Phoca largha NC008430 1                | Panthera pardus NC010641 5           | 0,17970341 |
| Nandinia binotata NC024567 1           | Arctocepalus australis MG023139 1    | 0,17970455 |
| Genetta abyssinica MG489822 1          | Bassariscus sumichrasti SRX1099089 1 | 0,17970464 |
| Nandinia binotata NC024567 1           | Arctocepalus gazella BK010918 1      | 0,17970531 |
| Taxidea taxus NC020646 1               | Paradoxurus jerdoni MH464793 1       | 0,17970796 |
| Martes flavigula NC012141 3            | Arctocepalus forsteri NC004023 28    | 0,17970876 |
| Meles meles T303 3                     | Leopardus wiedii NC028318 1          | 0,17971338 |
| Pusa sibirica NC008432 2               | Lycalopex securus KT448284 1         | 0,17971356 |
| Martes martes T302 3                   | Conepatus chinga NC042596 1          | 0,17971428 |
| Mustela frenata NC020640 1             | Lynx canadensis NC028313 1           | 0,17971623 |
| Viverricula indica XK891745 1          | Mustela sibirica AP017394 11         | 0,17971624 |
| Leptailurus serval NC028316 1          | Ailurus fulgens styani NC009691 1    | 0,17971687 |
| Mustela nigripes NC024942 1            | Lynx rufus NC014456 3                | 0,17971691 |
| Monachus schauinslandi NC008421 1      | Helogale parvula SRR7637809 1        | 0,17971784 |
| Ursus maritimus GU573488 Svalbard      | Nandinia binotata NC024567 1         | 0,17971802 |
| Viverricula indica XK891751 1          | Mustela erminea T305 2               | 0,17971838 |
| Otocolobus manul NC028323 1            | Mustela putorius NC020638 4          | 0,17971876 |
| Monachus schauinslandi NC008421 1      | Eupleres goudotii D128 1             | 0,17971945 |
| Viverricula indica NC025296 2          | Mustela itatsi NC034330 19           | 0,17972003 |
| Prionailurus bengalensis CKM45 20      | Martes melampus NC009678 1           | 0,17972006 |
| Taxidea taxus NC020646 1               | Prionailurus planiceps NC028312 6    | 0,17972007 |
| Mustela erminea T305 2                 | Felis chaus NC028307 1               | 0,17972043 |
| Taxidea taxus NC020646 1               | Pardofelis marmorata NLN3 2          | 0,17972165 |
| Spilogale putorius NC010497 1          | Halichoerus grypus NC001602 2        | 0,17972173 |
| Lynx canadensis NC028313 1             | Bassariscus sumichrasti SRX1099089 1 | 0,17972194 |
| Mustela erminea T305 2                 | Lycan pictus NC028427 2              | 0,17972304 |
| Neovison vison NC020641 3              | Canis aureus KT448274 1              | 0,17972323 |
| Ursus thibetanus mpupiensis NC008753 2 | Mustela eversmanni NC028013 1        | 0,1797245  |
| Prionailurus planiceps NC028312 6      | Mustela nivalis T306 5               | 0,1797276  |
| Otocolobus manul NC028323 1            | Canis aureus KT448274 1              | 0,17972802 |
| Neovison vison NC020641 3              | Genetta genetta T297 1               | 0,17972933 |
| Caracal caracal NC028306 1             | Arctodus simus NC011116 1            | 0,17973007 |
| Mustela nivalis T306 5                 | Leopardus guigna NC028321 1          | 0,17973042 |
| Ursus spelaeus NC011112 8              | Enhydra lutris NC009692 1            | 0,17973067 |
| Neovison vison NC020641 3              | Leptailurus serval NC028316 1        | 0,17973126 |
| Prionodon pardicolor NC024569 2        | Phoca groenlandica NC008429 54       | 0,17973222 |
| Prionailurus bengalensis NC028301 12   | Martes foina NC020643 1              | 0,17973316 |
| Martes foina NC020643 1                | Leptailurus serval NC028316 1        | 0,17973329 |
| Mustela putorius NC020638 4            | Acinonyx jubatus NC005212 3          | 0,17973335 |
| Monachus monachus NC044972 5           | Helogale parvula SRR7637809 1        | 0,17973445 |
| Mustela sibirica AP017394 11           | Canis lupus familiaris NC002008 1231 | 0,17974411 |
| Leopardus colocolo NC028314 1          | Arctodus simus NC011116 1            | 0,1797477  |
| Spilogale putorius NC010497 1          | Phoca vitulina NC001325 1            | 0,17975053 |
| Meles leucurus NC039173 4              | Civettictis civetta NC033378 1       | 0,17975089 |
| Martes foina NC020643 1                | Leopardus colocolo NC028314 1        | 0,1797516  |
| Ursus spelaeus EU327344 13             | Neovison vison NC020641 3            | 0,17975262 |
| Gulo gulo NC009685 3                   | Arctocepalus forsteri NC004023 28    | 0,17975673 |
| Meles anakuma NC009677 1               | Conepatus chinga NC042596 1          | 0,17976904 |
| Martes melampus NC009678 1             | Arctocepalus gazella BK010918 1      | 0,17976929 |
| Tremarctos ornatus NC009969 2          | Martes zibellina NC011579 39         | 0,17976975 |
| Martes americana NC020642 1            | Callorhinus ursinus NC008415 1       | 0,17976986 |
| Neophoca cinerea NC008419 1            | Arctotherium sp NC030174 1           | 0,17977177 |
| Pusa sibirica NC008432 2               | Galidia elegans D146 1               | 0,17977634 |
| Paradoxurus jerdoni MH464793 1         | Mustela frenata NC020640 1           | 0,1797768  |
| Mustela eversmanni NC028013 1          | Homotherium latidens MF871702 3      | 0,17977713 |
| Taxidea taxus NC020646 1               | Mungos mungo/gambianus SRR7704821 1  | 0,17977853 |
| Martes martes T302 3                   | Arctocepalus gazella BK010918 1      | 0,17977871 |
| Meles leucurus NC039173 4              | Lynx rufus NC014456 3                | 0,17977956 |
| Puma concolor NC016470 22              | Enhydra lutris NC009692 1            | 0,17978019 |
| Meles anakuma NC009677 1               | Lynx lynx NC027083 4                 | 0,17978024 |
| Vulpes corsac NC023958 1               | Phoca fasciata NC008428 1            | 0,1797829  |
| Lynx lynx NC027083 4                   | Callorhinus ursinus NC008415 1       | 0,17978305 |
| Lynx canadensis NC028313 1             | Callorhinus ursinus NC008415 1       | 0,17978309 |
| Mustela sibirica AP017394 11           | Lynx lynx NC027083 4                 | 0,17978331 |
| Neovison vison NC020641 3              | Neophoca cinerea NC008419 1          | 0,17978375 |

|                                       |                                      |            |
|---------------------------------------|--------------------------------------|------------|
| Bassariscus neblina SRX1097850 1      | Arctotherium sp NC030174 1           | 0,19304994 |
| Otaria byronia OTAB 1                 | Canis anthus NC027956 2              | 0,19304998 |
| Ursus arctos EU497665 29              | Ura javanica T413 1                  | 0,1930505  |
| Panthera tigris amoyensis NC014770 2  | Tapirus terrestris T358              | 0,19305162 |
| Panthera tigris NC010642 35           | Tapirus terrestris T358              | 0,19305168 |
| Mustela eversmanni NC028013 1         | Crocota crocota NC020670 3           | 0,19305603 |
| Nasua nasua NC020647 1                | Leopardus tigrinus NC028317 1        | 0,19305727 |
| Canis lupus familiaris NC002008 1231  | Arctocepalus forsteri NC004023 28    | 0,19305846 |
| Ursus arctos EU497665 29              | Paradoxurus hermaphroditus NC03959   | 0,19305974 |
| Ursus arctos pruinosus MG066703 3     | Otocyon megalotis SAF1 2             | 0,19306056 |
| Vulpes corsac NC023958 1              | Ursus arctos AP012576 6              | 0,19306158 |
| Galictis vittata T412 1               | Bdeogale nigripes GLC15 1            | 0,19306177 |
| Urocyon littoralis catalinae KP129018 | Arctictis binturong TG05 2           | 0,19306688 |
| Mephitis mephitis NC020648 1          | Hyaena hyaena NC020669 1             | 0,19307019 |
| Otaria byronia OTAB 1                 | Canis lupus chanco NC010340 4        | 0,1930739  |
| Speothos venaticus C48 2              | Galictis vittata T412 1              | 0,19307478 |
| Lutrogale perspicillata NC035811 1    | Canis lupus familiaris NC002008 1231 | 0,193076   |
| Lycalopex securus KT448284 1          | Arctocepalus pusillus NC008417 1     | 0,19307636 |
| Paradoxurus hermaphroditus NC03959    | Gulo gulo NC009685 3                 | 0,19308659 |
| Canis anthus NC027956 2               | Arctocepalus forsteri NC004023 28    | 0,19308735 |
| Panthera leo spelaea XK258452 2       | Melursus ursinus NC009970 2          | 0,19308868 |
| Spilogale putorius NC010497 1         | Felis catus NC001700 2               | 0,1930915  |
| Tremarctos ornatus NC009969 2         | Panthera pardus NC010641 5           | 0,19309406 |
| Vulpes zerdia KJ603240 1              | Eupleres goudotii D128 1             | 0,19310559 |
| Zalophus wolfebaeki SRR4431565 1      | Cuon alpinus NC013445 3              | 0,19310568 |
| Vulpes vulpes NC008434 5              | Cryptoprocta ferox CFC13 1           | 0,19311577 |
| Ursus arctos GU573491 207             | Bdeogale nigripes GLC15 1            | 0,19311763 |
| Vulpes zerdia KJ603240 1              | Prionodon pardicolor NC024569 2      | 0,19311793 |
| Procyon lotor AB462049 4              | Otocyon megalotis SAF1 2             | 0,19311878 |
| Speothos venaticus C48 2              | Prionodon linsang ERR2391707 1       | 0,19312115 |
| Lycan pictus NC028427 2               | Cryptoprocta ferox CFC13 1           | 0,19312565 |
| Puma yagouaroundi NC028311 1          | Nasua nasua NC020647 1               | 0,19312614 |
| Suricata suricatta SSM10 1            | Galictis vittata T412 1              | 0,1931293  |
| Vulpes vulpes NC008434 5              | Mephitis mephitis NC020648 1         | 0,19313152 |
| Ursus arctos AP012576 6               | Ura javanica T413 1                  | 0,19313382 |
| Ursus spelaeus NC011112 8             | Eupleres goudotii D128 1             | 0,1931354  |
| Panthera leo spelaea XK258452 2       | Arctotherium sp NC030174 1           | 0,19313905 |
| Ursus arctos pruinosus MG066703 3     | Panthera leo spelaea XK258452 2      | 0,19313918 |
| Odobenus rosmarus NC004029 29         | Lutrogale perspicillata NC035811 1   | 0,19314076 |
| Ursus americanus JX196366 3           | Attilax paludinosus T606 1           | 0,19314142 |
| Odobenus rosmarus NC004029 29         | Leopardus geoffroyi NC028320 1       | 0,19314487 |
| Ursus arctos GU573486 5               | Panthera leo spelaea XK258452 2      | 0,19314547 |
| Panthera leo spelaea XK258452 2       | Ailuropoda melanoleuca NC009492 5    | 0,19315071 |
| Ursus arctos AP012576 6               | Panthera onca NC022842 1             | 0,19315292 |
| Neofelis nebulosa NC008450 3          | Arctonyx collaris NC020645 1         | 0,1931538  |
| Lontra canadensis SRR10409165 1       | Cuon alpinus NC013445 3              | 0,19315428 |
| Arctocepalus forsteri NC004023 28     | Tapirus terrestris T358              | 0,19315596 |
| Hyaena hyaena NC020669 1              | Conepatus chinga NC042596 1          | 0,19315684 |
| Suricata suricatta SSM10 1            | Arctocepalus townsendi NC008420 1    | 0,1931712  |
| Arctocepalus forsteri NC004023 28     | Arctictis binturong TG05 2           | 0,19317144 |
| Vulpes corsac NC023958 1              | Lontra canadensis SRR10409165 1      | 0,1931721  |
| Vulpes lagopus NC026529 3             | Arctocepalus forsteri KT693377 17    | 0,19317324 |
| Lutrogale perspicillata NC035811 1    | Canis latrans NC008093 7             | 0,19317363 |
| Urocyon cinereoargenteus NC026723 2   | Melagale moschata V0735A 1           | 0,19317461 |
| Vulpes corsac NC023958 1              | Ichneumia albicauda TG03 1           | 0,19317566 |
| Ursus arctos EU497665 29              | Cynictis penicillata T375 1          | 0,19318499 |
| Ursus maritimus GU573488 Svalbard     | Ura javanica T413 1                  | 0,19318518 |
| Urocyon littoralis catalinae KP129018 | Felis chaus NC028307 1               | 0,19319026 |
| Speothos venaticus C48 2              | Conepatus chinga NC042596 1          | 0,19319193 |
| Prionailurus planiceps KY682741 4     | Bassariscus neblina SRX1097850 1     | 0,1931932  |
| Parahyaena brunnea NC038159 15        | Ailurus fulgens NC011124 1           | 0,19319321 |
| Panthera onca NC022842 1              | Tapirus terrestris T358              | 0,19319364 |
| Melursus ursinus NC009970 2           | Eupleres goudotii D128 1             | 0,19319464 |
| Vulpes lagopus NC026529 3             | Ursus arctos AP012576 6              | 0,19319555 |
| Mephitis mephitis NC020648 1          | Bdeogale nigripes GLC15 1            | 0,1931956  |
| Ursus americanus JX196366 3           | Ura javanica/auropunctata NC006835   | 0,19319746 |
| Ursus arctos pruinosus MG066703 3     | Pardofelis marmorata NLN3 2          | 0,19319838 |
| Viverra zibetha T609 1                | Odobenus rosmarus NC004029 29        | 0,19320019 |
| Lycan pictus NC028427 2               | Crocota crocota NC020670 3           | 0,19320594 |
| Neofelis nebulosa NC008450 3          | Eumetopias jubatus NC004030 10       | 0,19320595 |
| Zalophus californianus NC008416 1     | Urocyon cinereoargenteus NC026723 2  | 0,1932068  |
| Leopardus colocolo NC028314 1         | Bassariscus neblina SRX1097850 1     | 0,19320893 |
| Proteles cristata T393 6              | Melursus ursinus NC009970 2          | 0,19321504 |
| Ursus arctos EU497665 29              | Odobenus rosmarus NC004029 29        | 0,19321778 |
| Ursus thibetanus thibetanus NC011112  | Panthera leo spelaea XK258452 2      | 0,1932205  |
| Vulpes corsac NC023958 1              | Arctocepalus forsteri NC004023 28    | 0,19322294 |
| Spilogale putorius NC010497 1         | Felis chaus NC028307 1               | 0,19322714 |
| Otaria byronia OTAB 1                 | Cuon alpinus NC013445 3              | 0,19323118 |
| Vulpes ferrillata NC027935 1          | Potos flavus T414 1                  | 0,19324003 |
| Vulpes ferrillata NC027935 1          | Mungos mungo/gambianus SRR77048      | 0,19324102 |
| Vulpes corsac NC023958 1              | Arctonyx collaris NC020645 1         | 0,19324498 |
| Neofelis nebulosa NC008450 3          | Melursus ursinus NC009970 2          | 0,19324571 |
| Lycan pictus NC028427 2               | Arctocepalus townsendi NC008420 1    | 0,19324988 |
| Ursus maritimus NC003428 31           | Ura javanica T413 1                  | 0,1932525  |
| Otaria byronia OTAB 1                 | Tapirus terrestris T358              | 0,19325261 |
| Zalophus californianus NC008416 1     | Neofelis nebulosa NC008450 3         | 0,19325254 |
| Phocarcus hookeri NC008418 1          | Lycan pictus NC028427 2              | 0,19325469 |
| Ursus arctos GU573486 5               | Eupleres goudotii D128 1             | 0,19325539 |
| Panthera uncia NC010638 1             | Lutrogale perspicillata NC035811 1   | 0,19325851 |
| Nasua nasua NC020647 1                | Felis catus NC001700 2               | 0,19325875 |
| Ursus arctos GU573486 5               | Ura javanica T413 1                  | 0,19325902 |
| Lycalopex securus KT448284 1          | Callorhinus ursinus NC008415 1       | 0,19326043 |
| Panthera leo spelaea XK258452 2       | Martes zibellina NC011579 39         | 0,19326332 |
| Crocota crocota NC020670 3            | Arctotherium sp NC030174 1           | 0,19326533 |
| Lycalopex securus KT448284 1          | Galidia elegans D146 1               | 0,19326875 |
| Vulpes zerdia KJ603240 1              | Panthera leo spelaea XK258452 2      | 0,19327046 |
| Panthera leo spelaea XK258452 2       | Arctocepalus forsteri KT693377 17    | 0,19327122 |
| Mephitis mephitis NC020648 1          | Felis catus NC001700 2               | 0,19327177 |
| Phocarcus hookeri NC008418 1          | Panthera leo spelaea XK258452 2      | 0,19327371 |
| Parahyaena brunnea NC038159 15        | Chrysocyon brachyurus NC024172 1     | 0,19327645 |
| Odobenus rosmarus NC004029 29         | Catopuma badia NC028300 1            | 0,19327722 |
| Cryptoprocta ferox CFC13 1            | Chrysocyon brachyurus NC024172 1     | 0,19327728 |
| Lycalopex securus KT448284 1          | Arctocepalus forsteri KT693377 17    | 0,19327846 |

|                                              |                                               |            |
|----------------------------------------------|-----------------------------------------------|------------|
| <i>Panthera leo spelaea</i> KX258452 2       | <i>Halichoerus grypus</i> NCO01602 2          | 0,17978439 |
| <i>Meles meles</i> T303 3                    | <i>Catopuma temminckii</i> NCO27115 41        | 0,17978446 |
| <i>Martes melampus</i> NCO09678 1            | <i>Leopardus geoffroyi</i> NCO28320 1         | 0,17978467 |
| <i>Meles meles</i> T303 3                    | <i>Leopardus geoffroyi</i> NCO28320 1         | 0,1797847  |
| <i>Mungos mungo</i> MMMC7 1                  | <i>Monachus schauinslandi</i> NCO08421 1      | 0,17978491 |
| <i>Melogale moschata</i> V0735A 1            | <i>Lynx lynx</i> NCO27083 4                   | 0,17978521 |
| <i>Prionailurus bengalensis</i> NCO28301 12  | <i>Mustela putorius</i> NCO20638 4            | 0,1797854  |
| <i>Prionailurus rubiginosus</i> NCO28304 2   | <i>Mustela eversmannii</i> NCO28013 1         | 0,1797854  |
| <i>Prionailurus bengalensis</i> NCO28301 12  | <i>Mustela sibirica</i> AP017394 11           | 0,17978542 |
| <i>Lutra sumatrana</i> NCO35810 1            | <i>Leopardus geoffroyi</i> NCO28320 1         | 0,17978579 |
| <i>Melogale moschata</i> V0735A 1            | <i>Leopardus wiedii</i> NCO28318 1            | 0,1797868  |
| <i>Viverricula indica</i> KX891745 1         | <i>Nyctereutes procyonoides</i> NCO13700 3    | 0,17978719 |
| <i>Ursus maritimus</i> NCO03428 31           | <i>Meles meles</i> T303 3                     | 0,17978749 |
| <i>Ursus arctos isabellinus</i> 18B5 2       | <i>Meles meles</i> T303 3                     | 0,17978768 |
| <i>Mustela frenata</i> NCO20640 1            | <i>Lycaxon pictus</i> NCO28427 2              | 0,17978792 |
| <i>Viverra tangalunga</i> MH464792 1         | <i>Catopuma temminckii</i> NCO27115 41        | 0,17978792 |
| <i>Zalophus wolfebaeki</i> SRR4431565 1      | <i>Mustela itatsi</i> NCO34330 19             | 0,17978819 |
| <i>Civettictis civetta</i> NCO33378 1        | <i>Canis lupus chanco</i> NCO10340 4          | 0,17978834 |
| <i>Uru javanica</i> T413 1                   | <i>Canis adustus</i> KT448271 1               | 0,17978968 |
| <i>Prionodon pardicolor</i> NCO24569 2       | <i>Mirounga leonina</i> NCO08422 1            | 0,1797902  |
| <i>Melogale moschata</i> NCO20644 1          | <i>Lynx lynx</i> NCO27083 4                   | 0,17979248 |
| <i>Lutra sumatrana</i> NCO35810 1            | <i>Arctocepalus forsteri</i> NCO04023 28      | 0,17979495 |
| <i>Mustela kathiah</i> NCO23210 1            | <i>Chrysocyon brachyurus</i> NCO24172 1       | 0,17979625 |
| <i>Ursus thibetanus formosus</i> NCO09331 1  | <i>Mustela frenata</i> NCO20640 1             | 0,17979985 |
| <i>Zalophus californianus</i> NCO08416 1     | <i>Mustela sibirica</i> NCO20637 6            | 0,17980111 |
| <i>Ursus thibetanus laniger</i> MH281753 2   | <i>Mustela itatsi</i> NCO34330 19             | 0,17980325 |
| <i>Neovison vison</i> NCO20641 3             | <i>Chrysocyon brachyurus</i> NCO24172 1       | 0,1798068  |
| <i>Spilogale putorius</i> NCO10497 1         | <i>Pusa caspica</i> NCO08431 1                | 0,17980698 |
| <i>Martes martes</i> T302 3                  | <i>Canis adustus</i> KT448271 1               | 0,17980915 |
| <i>Zalophus californianus</i> NCO08416 1     | <i>Ursus thibetanus mupinensis</i> NCO08753 2 | 0,17981072 |
| <i>Enhydra lutris</i> NCO09692 1             | <i>Conepatus chinga</i> NCO42596 1            | 0,17981462 |
| <i>Panthera leo</i> NERO 19                  | <i>Canis adustus</i> KT448271 1               | 0,17981769 |
| <i>Erignathus barbatus</i> NCO08426 1        | <i>Cuon alpinus</i> NCO13445 3                | 0,17982492 |
| <i>Monachus monachus</i> NCO44972 5          | <i>Galictis vittata</i> T412 1                | 0,17982925 |
| <i>Viverricula indica</i> KX891751 1         | <i>Lycalopex securae</i> KT448284 1           | 0,17983446 |
| <i>Fossa fossana</i> D350 1                  | <i>Enhydra lutris</i> NCO09692 1              | 0,1798352  |
| <i>Mustela itatsi</i> NCO34330 19            | <i>Crossarchus platycephalus</i> C7R66 1      | 0,17983861 |
| <i>Viverra tangalunga</i> MH464792 1         | <i>Crossarchus platycephalus</i> C7R66 1      | 0,17983885 |
| <i>Phocartos hookeri</i> NCO08418 1          | <i>Martes zibellina</i> NCO11579 39           | 0,17983915 |
| <i>Mustela erminea</i> T305 2                | <i>Eupleres goudotii</i> D128 1               | 0,17984128 |
| <i>Mirounga angustirostris</i> SRR10331586 1 | <i>Cuon alpinus</i> NCO13445 3                | 0,17984204 |
| <i>Otaria byronia</i> OTAB 1                 | <i>Martes martes</i> T302 3                   | 0,1798469  |
| <i>Prionailurus planiceps</i> NCO28312 6     | <i>Enhydra lutris</i> NCO09692 1              | 0,17984785 |
| <i>Lynx rufus</i> NCO14456 3                 | <i>Arctonyx collaris</i> NCO20645 1           | 0,17984837 |
| <i>Prionailurus viverrinus</i> NCO28305 1    | <i>Meles leucurus</i> NCO39173 4              | 0,1798487  |
| <i>Otocolobus manul</i> NCO28323 1           | <i>Arctonyx collaris</i> NCO20645 1           | 0,17984976 |
| <i>Zalophus wolfebaeki</i> SRR4431565 1      | <i>Ailuurus fulgens</i> NCO11124 1            | 0,17985103 |
| <i>Mustela sibirica</i> AP017394 11          | <i>Lynx pardinus</i> NCO28319 161             | 0,17985135 |
| <i>Viverricula indica</i> KX891745 1         | <i>Viverra tangalunga</i> MH464792 1          | 0,17985168 |
| <i>Viverricula indica</i> NCO25296 2         | <i>Conepatus chinga</i> NCO42596 1            | 0,17985168 |
| <i>Mustela eversmannii</i> NCO28013 1        | <i>Leopardus pardalis</i> NCO28315 1          | 0,1798517  |
| <i>Mustela sibirica</i> AP017394 11          | <i>Leopardus pardalis</i> T262 1              | 0,17985174 |
| <i>Meles leucurus</i> NCO39173 4             | <i>Catopuma temminckii</i> NCO27115 41        | 0,17985183 |
| <i>Viverra tangalunga</i> MH464792 1         | <i>Felis silvestris lybica</i> KP202275 4     | 0,17985213 |
| <i>Mustela nigripes</i> NCO24942 1           | <i>Catopuma badia</i> NCO28300 1              | 0,17985468 |
| <i>Mustela erminea</i> T305 2                | <i>Caracal caracal</i> NCO28306 1             | 0,17985469 |
| <i>Ursus maritimus</i> GU573488 Svalbard     | <i>Meles meles</i> T303 3                     | 0,17985488 |
| <i>Phoca groenlandica</i> NCO08429 54        | <i>Lycalopex securae</i> KT448284 1           | 0,17985749 |
| <i>Viverra zibetha</i> T609 1                | <i>Arctodus simus</i> NCO11116 1              | 0,17985976 |
| <i>Taxidea taxus</i> NCO20646 1              | <i>Galidictis fasciata</i> DM333 1            | 0,1798605  |
| <i>Neovison vison</i> NCO20641 3             | <i>Lynx lynx</i> NCO27083 4                   | 0,1798609  |
| <i>Neovison vison</i> NCO20641 3             | <i>Lynx canadensis</i> NCO28313 1             | 0,17986138 |
| <i>Panthera pardus japonensis</i> KJ866876 8 | <i>Mirounga angustirostris</i> SRR10331586 1  | 0,17986254 |
| <i>Genetta servalina</i> NCO24568 2          | <i>Bassariscus sumichrasti</i> SRX1099089 1   | 0,17986262 |
| <i>Mustela sibirica</i> AP017394 11          | <i>Mephitis mephitis</i> NCO20648 1           | 0,17986444 |
| <i>Catopuma badia</i> NCO28300 1             | <i>Bassariscus sumichrasti</i> SRX1099089 1   | 0,17986599 |
| <i>Melurus ursinus</i> NCO09970 2            | <i>Meles meles</i> T303 3                     | 0,17986669 |
| <i>Martes americana</i> NCO20642 1           | <i>Helarctos malayanus</i> NCO09968 2         | 0,17986862 |
| <i>Spilogale putorius</i> NCO10497 1         | <i>Lutra lutra</i> LC050126 1                 | 0,17986867 |
| <i>Martes foina</i> NCO20643 1               | <i>Leopardus jacobita</i> NCO28322 1          | 0,17986888 |
| <i>Leopardus geoffroyi</i> NCO28320 1        | <i>Ictonyx striatus</i> T299 1                | 0,17986992 |
| <i>Viverricula indica</i> KX891745 1         | <i>Ursus thibetanus thibetanus</i> NCO11118 4 | 0,17987415 |
| <i>Proteles cristata</i> T393 6              | <i>Lobodon carinophaga</i> NCO08423 1         | 0,17987466 |
| <i>Monachus monachus</i> NCO44972 5          | <i>Cynictis penicillata</i> T375 1            | 0,17987688 |
| <i>Mustela putorius</i> NCO20638 4           | <i>Canis lupus familiaris</i> NCO02008 1231   | 0,17987849 |
| <i>Mustela sibirica</i> NCO20637 6           | <i>Canis lupus familiaris</i> NCO02008 1231   | 0,17987888 |
| <i>Panthera leo</i> NERO 19                  | <i>Mirounga leonina</i> NCO08422 1            | 0,17988542 |
| <i>Civettictis civetta</i> NCO33378 1        | <i>Arctonyx collaris</i> NCO20645 1           | 0,17988814 |
| <i>Civettictis civetta</i> NCO33378 1        | <i>Canis latrans</i> NCO08093 7               | 0,17988896 |
| <i>Potos flavus</i> T414 1                   | <i>Eumetopias jubatus</i> NCO04030 10         | 0,17988928 |
| <i>Xenogale naso</i> C07XAR110 1             | <i>Halichoerus grypus</i> NCO01602 2          | 0,17989042 |
| <i>Martes melampus</i> NCO09678 1            | <i>Arctocepalus townsendi</i> NCO08420 1      | 0,1799027  |
| <i>Mustela putorius</i> NCO20638 4           | <i>Conepatus chinga</i> NCO42596 1            | 0,17990689 |
| <i>Mustela erminea</i> T305 2                | <i>Mungos mungo</i> MMMC7 1                   | 0,17990874 |
| <i>Mustela erminea</i> T305 2                | <i>Attilax paludinosus</i> T606 1             | 0,17990953 |
| <i>Vulpes vulpes</i> NCO08434 5              | <i>Nandinia binotata</i> NCO24567 1           | 0,17990954 |
| <i>Potos flavus</i> T414 1                   | <i>Crossarchus platycephalus</i> C7R66 1      | 0,1799106  |
| <i>Tremarctos ornatus</i> NCO09969 2         | <i>Martes martes</i> T302 3                   | 0,17991087 |
| <i>Otocolobus manul</i> NCO28323 1           | <i>Meles meles</i> T303 3                     | 0,17991171 |
| <i>Mustela putorius</i> NCO20638 4           | <i>Lynx lynx</i> NCO27083 4                   | 0,17991801 |
| <i>Mustela sibirica</i> NCO20637 6           | <i>Lynx lynx</i> NCO27083 4                   | 0,17991801 |
| <i>Vulpes corsac</i> NCO23958 1              | <i>Viverricula indica</i> KX891745 1          | 0,17991805 |
| <i>Martes melampus</i> NCO09678 1            | <i>Leopardus pardalis</i> NCO28315 1          | 0,17991812 |
| <i>Mustela sibirica</i> NCO20637 6           | <i>Lynx pardinus</i> NCO28319 161             | 0,17991874 |
| <i>Homotherium latidens</i> MF871702 3       | <i>Canis lupus chanco</i> NCO10340 4          | 0,17991909 |
| <i>Ommatophoca rossii</i> AV377287etc 1      | <i>Lontra canadensis</i> SRR10409165 1        | 0,17991915 |
| <i>Prionailurus rubiginosus</i> NCO28304 2   | <i>Mustela putorius</i> NCO20638 4            | 0,17991996 |
| <i>Mustela nigripes</i> NCO24942 1           | <i>Felis silvestris lybica</i> KP202275 4     | 0,17992002 |
| <i>Puma yagouaroundi</i> NCO28311 1          | <i>Mustela eversmannii</i> NCO28013 1         | 0,17992014 |
| <i>Martes zibellina</i> NCO11579 39          | <i>Lynx lynx</i> NCO27083 4                   | 0,17992108 |
| <i>Viverricula indica</i> NCO25296 2         | <i>Mustela sibirica</i> AP017394 11           | 0,17992112 |
| <i>Mirounga angustirostris</i> SRR10331586 1 | <i>Bdeogale nigripes</i> GLC15 1              | 0,17992151 |
| <i>Canis adustus</i> KT448271 1              | <i>Arctonyx collaris</i> NCO20645 1           | 0,17992155 |

|                                              |                                              |            |
|----------------------------------------------|----------------------------------------------|------------|
| <i>Ursus maritimus</i> NCO03428 31           | <i>Odobenus rosmarus</i> NCO04029 29         | 0,193285   |
| <i>Ursus thibetanus laniger</i> MH281753 2   | <i>Panthera leo spelaea</i> KX258452 2       | 0,19328654 |
| <i>Eupleres goudotii</i> D128 1              | <i>Cuon alpinus</i> NCO13445 3               | 0,19328722 |
| <i>Ursus arctos</i> GU573491 207             | <i>Cuon alpinus</i> NCO13445 3               | 0,19329655 |
| <i>Mustela kathiah</i> NCO23210 1            | <i>Tapirus terrestris</i> T358               | 0,19329955 |
| <i>Vulpes corsac</i> NCO23958 1              | <i>Potos flavus</i> T414 1                   | 0,19330682 |
| <i>Vulpes corsac</i> NCO23958 1              | <i>Helogale parvula</i> SRR7637809 1         | 0,1933077  |
| <i>Speothos venaticus</i> C48 2              | <i>Panthera pardus</i> NCO10641 5            | 0,19330922 |
| <i>Hyaina hyaena</i> NCO20669 1              | <i>Tapirus terrestris</i> T358               | 0,19331548 |
| <i>Ursus maritimus</i> GU573488 Svalbard     | <i>Eupleres goudotii</i> D128 1              | 0,1933167  |
| <i>Proteles cristata</i> T393 6              | <i>Conepatus chinga</i> NCO42596 1           | 0,19331686 |
| <i>Vulpes ferrillata</i> NCO27935 1          | <i>Ursus maritimus</i> GU573488 Svalbard     | 0,19331789 |
| <i>Mellivora capensis</i> T370 1             | <i>Lobodon carinophaga</i> NCO08423 1        | 0,19332023 |
| <i>Ursus arctos pruinosus</i> MG066703 3     | <i>Panthera uncia</i> NCO10638 1             | 0,19333257 |
| <i>Melurus ursinus</i> NCO09970 2            | <i>Cynictis penicillata</i> T375 1           | 0,193333   |
| <i>Speothos venaticus</i> C48 2              | <i>Panthera pardus japonensis</i> KJ866876   | 0,19333334 |
| <i>Panthera tigris amoyensis</i> NCO14770 2  | <i>Mustela altaica</i> NCO21751 1            | 0,19333653 |
| <i>Odobenus rosmarus</i> NCO04029 29         | <i>Lontra canadensis</i> SRR10409165 1       | 0,1933375  |
| <i>Ursus arctos</i> GU573491 207             | <i>Proteles cristata</i> T393 6              | 0,19333954 |
| <i>Ursus arctos</i> EU497665 29              | <i>Panthera tigris</i> NCO10642 35           | 0,19333991 |
| <i>Nasua nasua</i> NCO20647 1                | <i>Acinonyx jubatus</i> NCO05212 3           | 0,19334398 |
| <i>Ursus arctos</i> AP012576 6               | <i>Panthera uncia</i> NCO10638 1             | 0,19334875 |
| <i>Canis mesomelas</i> KT448280 1            | <i>Arctocepalus australis</i> MG023139 1     | 0,19335166 |
| <i>Ursus spelaeus</i> EU327344 13            | <i>Panthera leo spelaea</i> KX258452 2       | 0,19335218 |
| <i>Vulpes ferrillata</i> NCO27935 1          | <i>Spilogale putorius</i> NCO10497 1         | 0,19335362 |
| <i>Mephitis mephitis</i> NCO20648 1          | <i>Canis mesomelas</i> KT448280 1            | 0,19336329 |
| <i>Vulpes zerda</i> KJ603240 1               | <i>Conepatus chinga</i> NCO42596 1           | 0,19336417 |
| <i>Parahyaena brunnea</i> NCO38159 15        | <i>Conepatus chinga</i> NCO42596 1           | 0,19336496 |
| <i>Canis anthus</i> NCO27956 2               | <i>Arctocepalus townsendi</i> NCO08420 1     | 0,19337437 |
| <i>Vulpes ferrillata</i> NCO27935 1          | <i>Lontra canadensis</i> SRR10409165 1       | 0,19337445 |
| <i>Vulpes corsac</i> NCO23958 1              | <i>Meles anakuma</i> NCO09677 1              | 0,19337822 |
| <i>Ursus arctos</i> AP012576 6               | <i>Cuon alpinus</i> NCO13445 3               | 0,1933783  |
| <i>Galidia elegans</i> D146 1                | <i>Ailuurus fulgens</i> NCO11124 1           | 0,19338006 |
| <i>Vulpes ferrillata</i> NCO27935 1          | <i>Arctonyx collaris</i> NCO20645 1          | 0,19338021 |
| <i>Ursus arctos</i> GU573491 207             | <i>Eupleres goudotii</i> D128 1              | 0,19338402 |
| <i>Vulpes ferrillata</i> NCO27935 1          | <i>Otaria byronia</i> OTAB 1                 | 0,19338451 |
| <i>Vulpes corsac</i> NCO23958 1              | <i>Hyaina hyaena</i> NCO20669 1              | 0,19338483 |
| <i>Vulpes lagopus</i> NCO26529 3             | <i>Parahyaena brunnea</i> NCO38159 15        | 0,19339101 |
| <i>Zalophus wolfebaeki</i> SRR4431565 1      | <i>Urocyon littoralis catalinae</i> KP129018 | 0,19339348 |
| <i>Crocuta crocuta</i> NCO20670 3            | <i>Arctocepalus townsendi</i> NCO08420 1     | 0,19339417 |
| <i>Panthera uncia</i> NCO10638 1             | <i>Otaria byronia</i> OTAB 1                 | 0,1933957  |
| <i>Caracal caracal</i> NCO28306 1            | <i>Bassariscyon neblina</i> SRR1097850 1     | 0,19339803 |
| <i>Ursus spelaeus</i> NCO11112 8             | <i>Eupleres goudotii</i> D128 1              | 0,19340491 |
| <i>Ursus arctos</i> GU573491 207             | <i>Mephitis mephitis</i> NCO20648 1          | 0,19340661 |
| <i>Vulpes ferrillata</i> NCO27935 1          | <i>Chrysocyon brachyurus</i> NCO24172 1      | 0,19340728 |
| <i>Vulpes corsac</i> NCO23958 1              | <i>Hyaina hyaena</i> NCO20669 1              | 0,19341281 |
| <i>Ursus arctos</i> GU573486 5               | <i>Proteles cristata</i> T393 6              | 0,19341281 |
| <i>Profelis aurata</i> NCO28299 1            | <i>Galictis vittata</i> T412 1               | 0,19341394 |
| <i>Ursus spelaeus</i> EU327344 13            | <i>Speothos venaticus</i> C48 2              | 0,19341664 |
| <i>Ursus spelaeus</i> NCO11112 8             | <i>Crocuta crocuta</i> NCO20670 3            | 0,19341683 |
| <i>Ursus thibetanus laniger</i> MH281753 2   | <i>Panthera tigris</i> NCO10642 35           | 0,19341983 |
| <i>Helarctos malayanus</i> NCO09968 2        | <i>Crocuta crocuta</i> NCO20670 3            | 0,19341992 |
| <i>Canis mesomelas</i> KT448280 1            | <i>Aonyx cinerea</i> NCO35814 2              | 0,19343656 |
| <i>Prionodon linsang</i> ERR2319707 1        | <i>Lontra canadensis</i> SRR10409165 1       | 0,19344221 |
| <i>Urocyon cinereoargenteus</i> NCO26723 2   | <i>Potos flavus</i> T414 1                   | 0,19344328 |
| <i>Paradoxurus hermaphroditus</i> NCO3959    | <i>Arctocepalus townsendi</i> NCO08420 1     | 0,19344476 |
| <i>Vulpes lagopus</i> NCO26529 3             | <i>Neophoca cinerea</i> NCO08419 1           | 0,19344635 |
| <i>Ursus arctos</i> EU497665 29              | <i>Eupleres goudotii</i> D128 1              | 0,19345132 |
| <i>Vulpes zerda</i> KJ603240 1               | <i>Paradoxurus hermaphroditus</i> NLCN 1     | 0,193452   |
| <i>Urocyon cinereoargenteus</i> NCO26723 2   | <i>Paguma larvata</i> PDS511 2               | 0,19345583 |
| <i>Panthera uncia</i> NCO10638 1             | <i>Martes zibellina</i> NCO11579 39          | 0,19345643 |
| <i>Prionodon pardicolor</i> NCO24569 2       | <i>Arctocepalus gazella</i> BK010918 1       | 0,19345883 |
| <i>Melurus ursinus</i> NCO09970 2            | <i>Galidia elegans</i> D146 1                | 0,19346835 |
| <i>Lycalopex securae</i> KT448284 1          | <i>Ichneumia albicauda</i> T603 1            | 0,19346894 |
| <i>Ursus arctos pruinosus</i> MG066703 3     | <i>Paradoxurus hermaphroditus</i> NCO3959    | 0,19347033 |
| <i>Canis mesomelas</i> KT448280 1            | <i>Arctocepalus forsteri</i> NCO04023 28     | 0,19347131 |
| <i>Ursus maritimus</i> GU573488 Svalbard     | <i>Proteles cristata</i> T393 6              | 0,19347428 |
| <i>Ursus arctos</i> EU497665 29              | <i>Proteles cristata</i> T393 6              | 0,19347437 |
| <i>Speothos venaticus</i> C48 2              | <i>Panthera tigris amoyensis</i> NCO14770 2  | 0,19347697 |
| <i>Galictis vittata</i> T412 1               | <i>Diplogale hosei</i> MH464790 1            | 0,19347748 |
| <i>Odobenus rosmarus</i> NCO04029 29         | <i>Leopardus tigrinus</i> NCO28317 1         | 0,19347863 |
| <i>Lutra lutra</i> NCO11358 9                | <i>Diplogale hosei</i> MH464790 1            | 0,19349125 |
| <i>Crocuta crocuta</i> NCO20670 3            | <i>Canis aureus</i> KT448274 1               | 0,19349827 |
| <i>Urocyon littoralis catalinae</i> KP129018 | <i>Galerella sanguinea</i> T378 1            | 0,19351122 |
| <i>Urocyon cinereoargenteus</i> NCO26723 2   | <i>Galerella sanguinea</i> T378 1            | 0,19351129 |
| <i>Vulpes lagopus</i> NCO26529 3             | <i>Arctocepalus gazella</i> BK010918 1       | 0,19351153 |
| <i>Speothos venaticus</i> C48 2              | <i>Lutra lutra</i> LC050126 1                | 0,1935156  |
| <i>Ursus maritimus</i> NCO03428 31           | <i>Eupleres goudotii</i> D128 1              |            |

|                                        |                                       |            |
|----------------------------------------|---------------------------------------|------------|
| Phoca vitulina NC001325 1              | Urva brachyura KY117547 1             | 0,17992224 |
| Mustela sibirica AP017394 11           | Leopardus geoffroyi NC028320 1        | 0,17992234 |
| Suricata suricatta SSM10 1             | Phoca vitulina NC001325 1             | 0,17992263 |
| Mustela erminea T305 2                 | Genetta genetta T297 1                | 0,17992319 |
| Prionailurus bengalensis CKM45 20      | Mustela putorius NC020638 4           | 0,17992404 |
| Ursus maritimus NC003428 31            | Hemigalus derbyanus MH464791 1        | 0,17992812 |
| Helarctos malayanus NC009968 2         | Arctocepalus townsendi NC008420 1     | 0,17993051 |
| Otocolobus manul NC028323 1            | Mustela nivalis T306 5                | 0,17993091 |
| Prionailurus bengalensis CKM45 20      | Lycalopex securae KT448284 1          | 0,17993224 |
| Prionailurus viverrinus NC028305 1     | Neovison vison NC020641 3             | 0,17993227 |
| Paguma larvata PDD511 2                | Bassariscus sumichrasti SRX1099089 1  | 0,17993444 |
| Meles meles T303 3                     | Leopardus colocolo NC028314 1         | 0,17993493 |
| Meles meles T303 3                     | Helarctos malayanus NC009968 2        | 0,17993528 |
| Zalophus californianus NC008416 1      | Aonyx cinerea NC035814 2              | 0,17994158 |
| Monachus monachus NC044972 5           | Lontra canadensis SRR10409165 1       | 0,17994393 |
| Martes foina NC020643 1                | Arctocepalus forsteri NC004023 28     | 0,17994568 |
| Ursus thibetanus formosanus NC009331 1 | Genetta abyssinica MG489822 1         | 0,17994764 |
| Eumetopias jubatus NC004030 10         | Crossarchus platycephalus C7R66 1     | 0,17994888 |
| Ursus thibetanus thibetanus NC011118 4 | Genetta abyssinica MG489822 1         | 0,17995112 |
| Mustela kathiah NC023210 1             | Genetta abyssinica MG489822 1         | 0,17995279 |
| Phoca vitulina NC001325 1              | Canis lupus familiaris NC002008 1231  | 0,17995462 |
| Caracal caracal NC028306 1             | Canis lupus familiaris NC002008 1231  | 0,17995618 |
| Vulpes corsac NC023958 1               | Civettictis civetta NC033378 1        | 0,17995629 |
| Ursus americanus JX196366 3            | Arctocepalus pusillus NC008417 1      | 0,17995803 |
| Phoca fasciata NC008428 1              | Neofelis nebulosa NC008450 3          | 0,17996186 |
| Gulo gulo NC009685 3                   | Arctodus simus NC011116 1             | 0,17996688 |
| Lutra sumatrana NC035810 1             | Arctocepalus townsendi NC008420 1     | 0,17997065 |
| Mustela putorius NC020638 4            | Crossarchus platycephalus C7R66 1     | 0,17997272 |
| Nandinia binotata NC024567 1           | Arctocepalus forsteri KT693377 17     | 0,17997474 |
| Neophoca cinerea NC008419 1            | Martes zibellina NC011579 39          | 0,17997447 |
| Otaria byronia OTAB 1                  | Martes zibellina NC011579 39          | 0,17997646 |
| Nandinia binotata NC024567 1           | Canis anthus NC027956 2               | 0,17997685 |
| Tremarctos ornatus NC009969 2          | Lutra sumatrana NC035810 1            | 0,17997724 |
| Puma yagouaroundi NC028311 1           | Enhydra lutris NC009692 1             | 0,17998168 |
| Chrotogale owstoni T607 1              | Bassariscus sumichrasti SRX1099089 1  | 0,17998175 |
| Puma concolor NC016470 22              | Lutra lutra NC011358 9                | 0,17998177 |
| Salanoia concolor D378 1               | Mustela frenata NC020640 1            | 0,17998272 |
| Meles leucurus NC039173 4              | Felis silvestris lybica KP202275 4    | 0,17998309 |
| Prionailurus bengalensis NC028301 12   | Meles anakuma NC009677 1              | 0,17998353 |
| Meles leucurus NC039173 4              | Leptailurus serval NC028316 1         | 0,17998418 |
| Puma concolor NC016470 22              | Mustela kathiah NC023210 1            | 0,17998604 |
| Leopardus pardalis T262 1              | Callorhinus ursinus NC008415 1        | 0,17998676 |
| Mustela nigripes NC024942 1            | Leopardus jacobita NC028322 1         | 0,17998721 |
| Otocolobus manul NC028323 1            | Mustela kathiah NC023210 1            | 0,17998724 |
| Ursus thibetanus mupinensis NC008753 2 | Melogale moschata KP726273 1          | 0,17998743 |
| Phoca fasciata NC008428 1              | Paradoxurus hermaphroditus NC039591 1 | 0,17998788 |
| Mirounga leonina NC008422 1            | Hyena hyaena NC020669 1               | 0,17998881 |
| Pardofelis marmorata NLN3 2            | Mustela erminea T305 2                | 0,17998828 |
| Paradoxurus jerdoni MH464793 1         | Conepatus chinga NC042596 1           | 0,17998892 |
| Martes zibellina NC011579 39           | Felis silvestris lybica KP202275 4    | 0,17998973 |
| Martes pennanti NC020664 16            | Genetta servalina NC024568 2          | 0,17999057 |
| Viverricula indica XK891745 1          | Arctotherium sp NC030174 1            | 0,17999059 |
| Vulpes vulpes NC008434 5               | Monachus schauinslandi NC008421 1     | 0,17999126 |
| Melogale moschata NC020644 1           | Lynx canadensis NC028313 1            | 0,17999458 |
| Prionailurus bengalensis NC028301 12   | Mustela altaica NC021751 1            | 0,17999487 |
| Phoca fasciata NC008428 1              | Panthera uncia NC010638 1             | 0,17999493 |
| Prionailurus rubiginosus NC028304 2    | Melogale moschata NC020644 1          | 0,17999554 |
| Ursus arctos GU573486 5                | Meles meles T303 3                    | 0,17999589 |
| Phoca groenlandica NC008429 54         | Lycan pictus NC028427 2               | 0,1799974  |
| Martes martes T302 3                   | Felis margarita NC028308 1            | 0,17999774 |
| Ursus thibetanus laniger MH281753 2    | Melogale moschata KP726273 1          | 0,17999795 |
| Neovison vison NC020641 3              | Leopardus jacobita NC028322 1         | 0,17999822 |
| Prionailurus rubiginosus NC028304 2    | Bassariscus sumichrasti SRX1099089 1  | 0,17999893 |
| Pusa hispida NC 008433 1               | Diplogale hoesi MH464790 1            | 0,18000084 |
| Mustela kathiah NC023210 1             | Arctictis binturong T605 2            | 0,18000093 |
| Ursus thibetanus formosanus NC009331 1 | Mustela kathiah NC023210 1            | 0,18000303 |
| Leopardus colocolo NC028314 1          | Callorhinus ursinus NC008415 1        | 0,18000422 |
| Ursus thibetanus thibetanus NC011118 4 | Callorhinus ursinus NC008415 1        | 0,18000713 |
| Mustela sibirica AP017394 11           | Canis lupus chanco NC010340 4         | 0,18001974 |
| Ursus maritimus GU573488 Svalbard      | Hemigalus derbyanus MH464791 1        | 0,18002033 |
| Genetta abyssinica MG489822 1          | Arctodus simus NC011116 1             | 0,18002276 |
| Leptailurus serval NC028316 1          | Canis lupus familiaris NC002008 1231  | 0,18002309 |
| Mustela nivalis T306 5                 | Hemigalus derbyanus MH464791 1        | 0,18002495 |
| Procyon lotor AB462049 4               | Eumetopias jubatus NC004030 10        | 0,18002793 |
| Hemigalus derbyanus MH464791 1         | Canis lupus familiaris NC002008 1231  | 0,18003133 |
| Panthera pardus NC010641 5             | Monachus schauinslandi NC008421 1     | 0,18003133 |
| Enhydra lutris NC009692 1              | Callorhinus ursinus NC008415 1        | 0,18003306 |
| Meles leucurus NC039173 4              | Arctocepalus townsendi NC008420 1     | 0,18003549 |
| Lutra lutra NC011358 9                 | Arctocepalus townsendi NC008420 1     | 0,18003589 |
| Lutra lutra NC011358 9                 | Arctocepalus gazella BK010918 1       | 0,18003701 |
| Chrotogale owstoni T607 1              | Ailurus fulgens NC011124 1            | 0,18004224 |
| Neophoca cinerea NC008419 1            | Ailurus fulgens styani NC009691 1     | 0,18004681 |
| Martes pennanti NC020664 16            | Arctocepalus australis MG021339 1     | 0,18004726 |
| Lutra lutra NC011358 9                 | Arctotherium sp NC030174 1            | 0,18004841 |
| Lutra lutra NC011358 9                 | Arctodus simus NC011116 1             | 0,18005039 |
| Puma yagouaroundi NC028311 1           | Arctonyx collaris NC020645 1          | 0,18005039 |
| Leopardus pardalis NC028315 1          | Enhydra lutris NC009692 1             | 0,18005097 |
| Otocolobus manul NC028323 1            | Meles leucurus NC039173 4             | 0,18005152 |
| Potos flavus T414 1                    | Civettictis civetta GLC19 1           | 0,18005255 |
| Prionailurus bengalensis NC028301 12   | Ailurus fulgens styani NC009691 1     | 0,18005298 |
| Zalophus wolfebaeki SRR4431565 1       | Lutra lutra NC011358 9                | 0,18005298 |
| Vulpes ferrillata NC027935 1           | Civettictis civetta GLC19 1           | 0,18005337 |
| Canis adustus KT448271 1               | Bassariscus sumichrasti SRX1099089 1  | 0,18005353 |
| Neovison vison NC020641 3              | Urva javanica T413 1                  | 0,18005358 |
| Lynx pardinus NC028319 161             | Lutra sumatrana NC035810 1            | 0,18005376 |
| Pusa sibirica NC008432 2               | Lycan pictus NC028427 2               | 0,18005376 |
| Viverra tangalunga MH464792 1          | Pardofelis marmorata NLN3 2           | 0,18005376 |
| Martes melampus NC009678 1             | Leopardus guigna NC028321 1           | 0,18005389 |
| Melogale moschata KP726273 1           | Lynx lynx NC027083 4                  | 0,1800542  |
| Prionailurus planiceps NC028312 6      | Mustela putorius NC020638 4           | 0,18005423 |
| Mustela evermanni NC028013 1           | Mustela wiedii NC028318 1             | 0,18005431 |
| Puma concolor NC016470 22              | Mustela nigripes NC024942 1           | 0,18005449 |
| Vulpes corsac NC023958 1               | Viverricula indica NC025296 2         | 0,18005459 |

|                                        |                                     |            |
|----------------------------------------|-------------------------------------|------------|
| Hemigalus derbyanus MH464791 1         | Bassariscus neblina SRX1097850 1    | 0,1935921  |
| Speothos venaticus C48 2               | Salanoia concolor D378 1            | 0,19359255 |
| Vulpes corsac NC023958 1               | Parahyaena brunnea NC038159 15      | 0,19359313 |
| Zalophus wolfebaeki SRR4431565 1       | Urocyon cinereoargenteus NC026723 2 | 0,19359577 |
| Ursus arctos pruinosus MG066703 3      | Urva javanica T413 1                | 0,19359601 |
| Nyctereutes procyonoides NC013700 3    | Crocota crocata NC020670 3          | 0,19359714 |
| Lutrogale perspicillata NC035811 1     | Crocota crocata NC020670 3          | 0,19359747 |
| Mephitis mephitis NC020648 1           | Urva semitorquata MH464789 1        | 0,19359837 |
| Vulpes zerdia KJ603240 1               | Ursus spelaeus EU327344 13          | 0,19360034 |
| Tremarctos ornatus NC009969 2          | Crocota crocata NC020670 3          | 0,19360121 |
| Urocyon cinereoargenteus NC026723 2    | Helarctos malayanus NC009968 2      | 0,19360192 |
| Ursus arctos GU573491 207              | Pardofelis marmorata NLN3 2         | 0,1936021  |
| Crocota crocata NC020670 3             | Arctocepalus forsteri NC004023 28   | 0,19360216 |
| Ursus maritimus NC003428 31            | Proteles cristata T393 6            | 0,19360894 |
| Odobenus rosmarus NC004029 29          | Genetta genetta T297 1              | 0,19360928 |
| Canis lupus familiaris NC002008 1231   | Arctocepalus townsendi NC008420 1   | 0,19361158 |
| Ursus arctos AP012576 6                | Pardofelis marmorata NLN3 2         | 0,19361871 |
| Speothos venaticus C48 2               | Melursus ursinus NC009970 2         | 0,19361898 |
| Spilogale putorius NC010497 1          | Cynictis penicillata T375 1         | 0,19362232 |
| Ursus arctos AP012576 6                | Chrysoyon brachyurus NC024172 1     | 0,19362426 |
| Mungotictis decemlineata NC027828      | Cuon alpinus NC013445 3             | 0,19363223 |
| Procyon lotor AB462049 4               | Neofelis nebulosa NC008450 3        | 0,19363448 |
| Vulpes corsac NC023958 1               | Conepatus chinga NC042596 1         | 0,19363981 |
| Urocyon cinereoargenteus NC026723 2    | Urva semitorquata MH464789 1        | 0,19364554 |
| Urocyon cinereoargenteus NC026723 2    | Otaria byronia OTAB 1               | 0,19365309 |
| Nyctereutes procyonoides NC013700 3    | Cynogale bennetti KY117544 1        | 0,19365358 |
| Vulpes ursinus NC008434 5              | Ursus maritimus GU573488 Svalbard   | 0,19365385 |
| Vulpes lagopus NC026529 3              | Ursus arctos GU573491 207           | 0,19365399 |
| Nasua nasua NC020647 1                 | Arctotherium sp NC030174 1          | 0,19365436 |
| Ursus arctos isabellinus 18B5 2        | Urva brachyura KY117547 1           | 0,19365636 |
| Speothos venaticus C48 2               | Urva javanica T413 1                | 0,19365801 |
| Urocyon cinereoargenteus NC026723 2    | Mustela altaica NC021751 1          | 0,19365822 |
| Ursus arctos pruinosus MG066703 3      | Eupleres goudotii D128 1            | 0,19365947 |
| Urocyon littoralis catalinae KP129018  | Profelis aurata NC028299 1          | 0,19366185 |
| Ursus arctos AP012576 6                | Eupleres goudotii D128 1            | 0,1936646  |
| Vulpes vulpes NC008434 5               | Urocyon cinereoargenteus NC009970 2 | 0,19366512 |
| Atlix paludinosus T606 1               | Ailuropoda melanoleuca NC009492 5   | 0,19366649 |
| Canis lupus chanco NC010340 4          | Arctocepalus townsendi NC008420 1   | 0,19366775 |
| Vulpes zerdia KJ603240 1               | Diplogale hoesi MH464790 1          | 0,19367407 |
| Salanoia concolor D378 1               | Mephitis mephitis NC020648 1        | 0,19368133 |
| Ursus spelaeus NC011112 8              | Speothos venaticus C48 2            | 0,19368568 |
| Ursus thibetanus formosanus NC009331 1 | Panthera leo spelaea XK258452 2     | 0,19368927 |
| Cynogale bennetti KY117544 1           | Callorhinus ursinus NC008415 1      | 0,19369516 |
| Melursus ursinus NC009970 2            | Chrysoyon brachyurus NC024172 1     | 0,19369593 |
| Suricata suricatta SSM10 1             | Cuon alpinus NC013445 3             | 0,19369763 |
| Martes pennanti NC020664 16            | Cynogale bennetti KY117544 1        | 0,19370754 |
| Speothos venaticus C48 2               | Eupleres goudotii D128 1            | 0,19371916 |
| Procyon lotor AB462046 3               | Galidia elegans D146 1              | 0,19371924 |
| Vulpes vulpes NC008434 5               | Ursus arctos isabellinus 18B5 2     | 0,19372097 |
| Cryptoprocta ferox CF13 1              | Ailurus fulgens styani NC009691 1   | 0,19372107 |
| Vulpes vulpes NC008434 5               | Ursus arctos EU497665 29            | 0,19372115 |
| Urocyon cinereoargenteus NC026723 2    | Cynogale bennetti KY117544 1        | 0,19372313 |
| Speothos venaticus C48 2               | Mustela nivalis T306 5              | 0,19372691 |
| Prionailurus planiceps NC028312 6      | Galidictis fasciata DM333 1         | 0,19372703 |
| Prionailurus planiceps KY682741 4      | Nasua nasua NC020647 1              | 0,1937301  |
| Nasua nasua NC020647 1                 | Leptailurus serval NC028316 1       | 0,19373289 |
| Helogale parvula SRR7637809 1          | Ailuropoda melanoleuca NC009492 5   | 0,19373374 |
| Vulpes vulpes NC008434 5               | Ursus arctos AP012576 6             | 0,19373438 |
| Ursus arctos GU573491 207              | Panthera uncia NC010638 1           | 0,19373631 |
| Urocyon littoralis catalinae KP129018  | Helarctos malayanus NC009968 2      | 0,19373667 |
| Speothos venaticus C48 2               | Panthera uncia KP202669 1           | 0,19373739 |
| Panthera leo NERO 19                   | Cuon alpinus NC013445 3             | 0,19373868 |
| Lutra lutra NC011358 9                 | Cuon alpinus NC013445 3             | 0,19374803 |
| Speothos venaticus C48 2               | Panthera onca NC022842 1            | 0,19374852 |
| Ursus thibetanus formosanus NC009331 1 | Crocota crocata NC020670 3          | 0,19375113 |
| Lycalopex securae KT448284 1           | Arctocepalus australis MG021339 1   | 0,19375196 |
| Canis mesomelas KT448280 1             | Arctocepalus townsendi NC008420 1   | 0,19376059 |
| Speothos venaticus C48 2               | Panthera leo NERO 19                | 0,19376907 |
| Urocyon littoralis catalinae KP129018  | Urva semitorquata MH464789 1        | 0,19378018 |
| Procyon lotor AB462046 3               | Arctocepalus forsteri KT693377 17   | 0,19378139 |
| Vulpes zerdia KJ603240 1               | Arctocepalus forsteri KT693377 17   | 0,19378167 |
| Vulpes lagopus NC026529 3              | Phocarcos hookeri NC008418 1        | 0,19378176 |
| Chrotogale owstoni T607 1              | Bassariscus neblina SRX1097850 1    | 0,19378218 |
| Urocyon cinereoargenteus NC026723 2    | Tremarctos ornatus NC009969 2       | 0,19378299 |
| Urocyon littoralis catalinae KP129018  | Tremarctos ornatus NC009969 2       | 0,19378306 |
| Prionodon linsang ERR2391707 1         | Neophoca cinerea NC008419 1         | 0,19378395 |
| Vulpes ferrillata NC027935 1           | Procyon lotor AB462046 3            | 0,193785   |
| Vulpes vulpes NC008434 5               | Ursus maritimus NC003428 31         | 0,1937885  |
| Ursus maritimus GU573488 Svalbard      | Suricata suricatta SSM10 1          | 0,19379094 |
| Ursus maritimus GU573488 Svalbard      | Urva brachyura KY117547 1           | 0,19379121 |
| Phocarcos hookeri NC008418 1           | Otocyon megalotis SAF1 2            | 0,19379234 |
| Tremarctos ornatus NC009969 2          | Prionodon pardicolor NC024569 2     | 0,19379458 |
| Lutrogale perspicillata NC035811 1     | Ailuropoda melanoleuca NC009492 5   | 0,19379942 |
| Mephitis mephitis NC020648 1           | Atlix paludinosus T606 1            | 0,19380003 |
| Galictis vittata T412 1                | Canis anthus NC027956 2             | 0,19380538 |
| Parahyaena brunnea NC038159 15         | Ailuropoda melanoleuca NC009492 5   | 0,19381575 |
| Prionailurus bengalensis CKM45 20      | Odobenus rosmarus NC004029 29       | 0,19381937 |
| Panthera onca NC022842 1               | Mephitis mephitis NC020648 1        | 0,19382495 |
| Ursus arctos GU573491 207              | Cynogale bennetti KY117544 1        | 0,19384919 |
| Urocyon cinereoargenteus NC026723 2    | Arctonyx collaris NC020645 1        | 0,1938539  |
| Urocyon littoralis catalinae KP129018  | Otaria byronia OTAB 1               | 0,19385494 |
| Vulpes ferrillata NC027935 1           | Ursus arctos EU497665 29            | 0,19385681 |
| Lontra canadensis SRR10409165 1        | Chrysoyon brachyurus NC024172 1     | 0,19386193 |
| Panthera leo spelaea XK258452 2        | Conepatus chinga NC042596 1         | 0,19386424 |
| Nasua nasua NC020647 1                 | Felis nigripes NC028309 1           | 0,19386533 |
| Odobenus rosmarus NC004029 29          | Mungos mungo MMFC7 1                | 0,1938671  |
| Urocyon littoralis catalinae KP129018  | Urva javanica/urpuncinata NC006835  | 0,1938861  |
| Spilogale putorius NC010497 1          | Urva semitorquata MH464789 1        | 0,19389161 |
| Tremarctos ornatus NC009969 2          | Cuon alpinus NC013445 3             | 0,19389175 |
| Spilogale putorius NC010497 1          | Galierella sanguinea T378 1         | 0,19389202 |
| Phocarcos hookeri NC008418 1           | Canis aureus KT448274 1             | 0,19389509 |
| Galidia elegans D146 1                 | Canis mesomelas KT448280 1          | 0,19389707 |



|                                        |                                       |            |                                       |            |
|----------------------------------------|---------------------------------------|------------|---------------------------------------|------------|
| Otocolobus manul NC028323 1            | Mustela sibirica NC020637 6           | 0,18005548 | Arctocepalus forsteri NC004023 28     | 0,1938988  |
| Prionailurus rubiginosus NC028304 2    | Potos flavus T414 1                   | 0,18005566 | Canis mesomelas KT448280 1            | 0,19390465 |
| Martes zibellina NC011579 39           | Lynx canadensis NC028313 1            | 0,18005566 | Ursus maritimus NC003428 31           | 0,1939057  |
| Speothos venaticus C48 2               | Leptonyx chotes weddellii NC008424 1  | 0,18005581 | Ursus arctos isabellinus 1885 2       | 0,19390774 |
| Puma yagouaroundi NC028311 1           | Mustela altaica NC021751 1            | 0,18006219 | Nasua nasua NC020647 1                | 0,19390808 |
| Taxidea taxus NC020646 1               | Arctictis binturong T605 2            | 0,18006282 | Arctocepalus townsendi NC008420 1     | 0,19390854 |
| Panthera onca KP202264 2               | Canis adustus KT448271 1              | 0,18006478 | Vulpes zerdia KJ603240 1              | 0,19391634 |
| Phoca vitulina NC001325 1              | Lycalopex securae KT448284 1          | 0,18006659 | Urocyon littoralis catalinae KP129018 | 0,19391772 |
| Leopardus wiedii NC028318 1            | Arctodus simus NC011116 1             | 0,18006614 | Urocyon cinereogargenteus NC026723 3  | 0,19391781 |
| Ursus thibetanus thibetanus NC011118 4 | Arctocepalus gazella BK010918 1       | 0,18006822 | Ursus americanus JX196366 3           | 0,19391948 |
| Homotherium latidens MF871702 3        | Bassariscus sumichrasti SRX1099089 1  | 0,18006825 | Ursus arctos isabellinus 1885 2       | 0,19392541 |
| Martes foina NC020643 1                | Felis margarita NC028308 1            | 0,18006948 | Ursus arctos EU497665 29              | 0,19392563 |
| Spilogale putorius NC010497 1          | Lutra lutra NC011358 9                | 0,18006954 | Vulpes zerdia KJ603240 1              | 0,1939273  |
| Martes foina NC020643 1                | Leopardus wiedii NC028318 1           | 0,18007046 | Speothos venaticus C48 2              | 0,19392908 |
| Mustela putorius NC020638 4            | Leopardus colocolo NC028314 1         | 0,1800722  | Genetta genetta T297 1                | 0,19393048 |
| Ailurus fulgens NC011124 1             | Ailurus melanoleuca NC009492 5        | 0,1800729  | Proteles cristata T393 6              | 0,19393115 |
| Ursus spelaeus NC011112 8              | Mustela kathiah NC023210 1            | 0,18007325 | Mephitis mephitis NC020648 1          | 0,19393155 |
| Mephitis mephitis NC020648 1           | Ailurus fulgens NC011124 1            | 0,18007618 | Procyon lotor AB462049 4              | 0,19393502 |
| Panthera uncia KP202269 1              | Canis adustus KT448271 1              | 0,18007974 | Speothos venaticus C48 2              | 0,19393644 |
| Leopardus pardalis T262 1              | Chrysocyon brachyurus NC024172 1      | 0,18008003 | Proteles cristata T393 6              | 0,19393708 |
| Pusa sibirica NC008432 2               | Canis lupus chanco NC010340 4         | 0,18008508 | Odobenus rosmarus NC004029 29         | 0,19395003 |
| Phoca largha NC008430 1                | Canis lupus familiaris NC002008 1231  | 0,18008898 | Odobenus rosmarus NC004029 29         | 0,193951   |
| Otocolobus manul NC028323 1            | Canis lupus familiaris NC002008 1231  | 0,18009041 | Proteles cristata T393 6              | 0,19395456 |
| Neophoca cinerea NC008419 1            | Martes flavigula NC012141 3           | 0,18009096 | Otaria byronia OTAB 1                 | 0,19395697 |
| Poecilogale albinucha T602 1           | Eumetopias jubatus NC004030 10        | 0,18009537 | Galictis vittata T412 1               | 0,19395745 |
| Prionailurus rubiginosus NC028304 2    | Canis lupus chanco NC010340 4         | 0,18009634 | Proteles cristata T393 6              | 0,19395763 |
| Civettictis civetta NC033378 1         | Arctodus simus NC011116 1             | 0,18009925 | Panthera leo spelaea KX258452 2       | 0,1939632  |
| Viverricula indica KX891745 1          | Lycalopex securae KT448284 1          | 0,18010071 | Neophoca cinerea NC008419 1           | 0,1939635  |
| Ursus arctos GU573486 5                | Homotherium latidens MF871702 3       | 0,18010178 | Cynogale bennetti KY117544 1          | 0,19396792 |
| Lycan pictus NC028427 2                | Halichoerus grypus NC001602 2         | 0,18010187 | Ursus arctos pruinosus MG066703 3     | 0,19396974 |
| Meles leucurus NC009173 4              | Arctocepalus australis MG023139 1     | 0,18010364 | Melursus ursinus NC009970 2           | 0,1939787  |
| Lutra lutra LC050126 1                 | Arctocepalus forsteri KT693377 17     | 0,18010372 | Galidia elegans D146 1                | 0,19397998 |
| Melogale moschata KP726273 1           | Callorhinus ursinus NC008415 1        | 0,18010467 | Vulpes zerdia KJ603240 1              | 0,19398157 |
| Mustela kathiah NC023210 1             | Chrotogale owstoni T607 1             | 0,18010539 | Urocyon littoralis catalinae KP129018 | 0,19398192 |
| Neophoca cinerea NC008419 1            | Lutra sumatrana NC035810 1            | 0,18010595 | Panthera pardus japonensis KJ866876   | 0,19398212 |
| Mustela nigripes NC024942 1            | Crossarchus platycephalus C7R66 1     | 0,18010777 | Vulpes ferrillata NC027935 1          | 0,19398451 |
| Tremarctos ornatus NC009969 2          | Meles meles T303 3                    | 0,18010975 | Vulpes corsac NC023958 1              | 0,19398549 |
| Vulpes lagopus NC026529 3              | Pusa caspica NC008431 1               | 0,18011054 | Urocyon littoralis catalinae KP129018 | 0,19398856 |
| Meles anakuma NC009677 1               | Arctocepalus pusillus NC008417 1      | 0,1801106  | Phoca largha NC008430 1               | 0,19398974 |
| Ursus spelaeus EU327344 13             | Homotherium latidens MF871702 3       | 0,1801113  | Viverricula indica KX891751 1         | 0,19399281 |
| Enhydra lutris NC009692 1              | Civettictis civetta GLC19 1           | 0,1801133  | Speothos venaticus C48 2              | 0,1939936  |
| Arctocepalus pusillus NC008417 1       | Aonyx cinerea NC035814 2              | 0,18011588 | Urocyon littoralis catalinae KP129018 | 0,19399628 |
| Prionailurus planiceps KY682741 4      | Enhydra lutris NC009692 1             | 0,1801171  | Phocarcus hookeri NC008418 1          | 0,19399677 |
| Otaria byronia OTAB 1                  | Mustela kathiah NC023210 1            | 0,18011846 | Panthera uncia NC010638 1             | 0,19399694 |
| Meles meles T303 3                     | Arctotherium sp NC030174 1            | 0,18011905 | Vulpes lagopus NC026529 3             | 0,19400002 |
| Paradoxurus jerdoni MH464793 1         | Meles meles T303 3                    | 0,18011934 | Proteles cristata T393 6              | 0,19400175 |
| Prionailurus rubiginosus NC028304 2    | Canis aureus KT448274 1               | 0,18011951 | Odobenus rosmarus NC004029 29         | 0,19400935 |
| Vulpes vulpes NC008434 5               | Viverricula indica KX891751 1         | 0,1801199  | Panthera tigris NC010642 35           | 0,1940099  |
| Mustela itatsi NC034330 19             | Lynx lynx NC027083 4                  | 0,18012019 | Prionodon pardicolor NC024569 2       | 0,19401075 |
| Mustela sibirica NC020637 6            | Lynx canadensis NC028313 1            | 0,1801202  | Panthera onca KP202264 2              | 0,19401138 |
| Viverra tangalunga MH464792 1          | Leopardus pardalis NC028315 1         | 0,18012038 | Urocyon littoralis catalinae KP129018 | 0,19401196 |
| Meles anakuma NC009677 1               | Homotherium latidens MF871702 3       | 0,18012047 | Ursus arctos isabellinus 1885 2       | 0,19401297 |
| Zalophus wollbeaeki SRR4431565 1       | Lutra lutra LC050126 1                | 0,18012053 | Odobenus rosmarus NC004029 29         | 0,19401757 |
| Viverra zibetha T609 1                 | Mustela nigripes NC024942 1           | 0,18012145 | Panthera pardus NC010641 5            | 0,19402528 |
| Mustela frenata NC020640 1             | Catopuma badia NC028300 1             | 0,18012194 | Spilogale putorius NC010497 1         | 0,19402954 |
| Leopardus geoffroyi NC028320 1         | Arctonyx collaris NC020645 1          | 0,18012221 | Panthera onca KP202264 2              | 0,19403674 |
| Zalophus wollbeaeki SRR4431565 1       | Arctonyx collaris NC020637 6          | 0,18012348 | Neophoca cinerea NC008419 1           | 0,1940444  |
| Viverricula indica NC025296 2          | Ailurus fulgens styani NC009691 1     | 0,18012401 | Urocyon cinereogargenteus NC026723 3  | 0,19405077 |
| Paradoxurus jerdoni MH464793 1         | Ailurus fulgens styani NC009691 1     | 0,18012469 | Nyctereutes procyonoides NC013700 3   | 0,1940541  |
| Meles meles T303 3                     | Arctocepalus forsteri NC004023 28     | 0,18012485 | Urocyon littoralis catalinae KP129018 | 0,19405417 |
| Pusa caspica NC008431 1                | Canis mesomelas KT448280 1            | 0,18012577 | Vulpes vulpes NC008434 5              | 0,19405775 |
| Spilogale putorius NC010497 1          | Gulo gulo NC009685 3                  | 0,180126   | Ursus arctos GU573491 207             | 0,19406037 |
| Prionailurus bengalensis CKM45 20      | Mustela sibirica NC020637 6           | 0,18012609 | Speothos venaticus C48 2              | 0,19406676 |
| Ursus thibetanus mupinensis NC008753 2 | Mustela frenata NC020640 1            | 0,18012775 | Ursus arctos GU573486 5               | 0,19406693 |
| Puma concolor NC016470 22              | Mustela altaica NC021751 1            | 0,18012953 | Xenogale naso C07XAR110 1             | 0,19407018 |
| Procyon lotor AB462046 3               | Prionailurus rubiginosus NC028301 12  | 0,18012971 | Vulpes zerdia KJ603240 1              | 0,19407184 |
| Ursus arctos GU573491 207              | Mustela erminea T305 2                | 0,18012975 | Neophoca cinerea NC008419 1           | 0,19407873 |
| Ursus thibetanus mupinensis NC008753 2 | Martes martes T302 3                  | 0,18013036 | Urocyon cinereogargenteus NC026723 3  | 0,1940829  |
| Prionailurus bengalensis NC028301 12   | Mustela nivalis T306 5                | 0,18013208 | Puma concolor NC016470 22             | 0,19408499 |
| Leopardus geoffroyi NC028320 1         | Bassariscus sumichrasti SRX1099089 1  | 0,18013424 | Urocyon cinereogargenteus NC026723 3  | 0,19408821 |
| Viverra tangalunga MH464792 1          | Mephitis mephitis NC020648 1          | 0,18013494 | Ursus thibetanus thibetanus NC011118  | 0,19409001 |
| Prionodon pardicolor NC024569 2        | Mirounga angustirostris SRR10331586 1 | 0,18013713 | Cynogale bennetti KY117544 1          | 0,1941026  |
| Ursus spelaeus EU327344 13             | Mustela sibirica AP017394 11          | 0,18013896 | Panthera uncia NC010638 1             | 0,19410425 |
| Ursus thibetanus laniger MH281753 2    | Mustela kathiah NC023210 1            | 0,18013948 | Otaria byronia OTAB 1                 | 0,19410621 |
| Ursus spelaeus EU327344 13             | Mustela frenata NC020640 1            | 0,18013953 | Ursus maritimus GU573488 Svalbard     | 0,19410774 |
| Mustela itatsi NC034330 19             | Leopardus colocolo NC028314 1         | 0,18014005 | Panthera pardus japonensis KJ866876   | 0,19410996 |
| Homotherium latidens MF871702 3        | Canis lupus familiaris NC002008 1231  | 0,18014099 | Urocyon littoralis catalinae KP129018 | 0,19411789 |
| Ursus thibetanus laniger MH281753 2    | Genetta abyssinica MG489822 1         | 0,18014376 | Vulpes vulpes NC008434 5              | 0,19411826 |
| Martes flavigula NC012141 3            | Crossarchus platycephalus C7R66 1     | 0,18014811 | Vulpes lagopus NC026529 3             | 0,19412103 |
| Ursus arctos GU573491 207              | Hemigalus derbyanus MH464791 1        | 0,18015589 | Mungotictis decemlineata NC027828     | 0,19412291 |
| Chrysocyon brachyurus NC024172 1       | Acinonyx jubatus NC005212 3           | 0,18016259 | Cryptoprocta ferox CFC13 1            | 0,19412525 |
| Mustela nivalis T306 5                 | Genetta abyssinica MG489822 1         | 0,18016885 | Panthera tigris amoyensis NC014770 2  | 0,19412781 |
| Callorhinus ursinus NC008415 1         | Arctotherium sp NC030174 1            | 0,18016915 | Suricata suricatta SSM10 1            | 0,19412871 |
| Nasua nasua NC020647 1                 | Lutra lutra LC050126 1                | 0,18016987 | Paradoxurus hermaphroditus NC03959    | 0,19413091 |
| Martes pennanti NC020664 16            | Hemigalus derbyanus MH464791 1        | 0,18017049 | Poecilogale albinucha T602 1          | 0,19413334 |
| Neophoca cinerea NC008419 1            | Lutra lutra LC050126 1                | 0,18017143 | Conepatus chinga NC042596 1           | 0,19413516 |
| Viverra tangalunga MH464792 1          | Conepatus chinga NC042596 1           | 0,18017235 | Nasua nasua NC020647 1                | 0,19413666 |
| Lutra sumatrana NC035810 1             | Arctocepalus australis MG023139 1     | 0,18017313 | Proteles cristata T393 6              | 0,19413826 |
| Procyon lotor AB462049 4               | Callorhinus ursinus NC008415 1        | 0,18017568 | Melursus ursinus NC009970 2           | 0,194141   |
| Mustela nigripes NC020494 2            | Conepatus chinga NC042596 1           | 0,18017673 | Ursus thibetanus mupinensis NC00875   | 0,19414306 |
| Vulpes lagopus NC026529 3              | Mirounga leonina NC008422 1           | 0,1801794  | Panthera uncia KP202269 1             | 0,19415402 |
| Prionailurus viverrinus NC028305 1     | Canis adustus KT448271 1              | 0,18017955 | Ursus americanus JX196366 3           | 0,19415483 |
| Ommatophoca rossii AY377287etc 1       | Felis chaus NC028307 1                | 0,18018056 | Ursus arctos pruinosus MG066703 3     | 0,19415772 |
| Tremarctos ornatus NC009969 2          | Mustela kathiah NC023210 1            | 0,18018076 | Ursus arctos AP012576 6               | 0,19416605 |
| Felis silvestris lybica KP202275 4     | Enhydra lutris NC009692 1             | 0,18018489 | Otaria byronia OTAB 1                 | 0,1941745  |
| Viverricula indica KX891745 1          | Meles meles T303 3                    | 0,18018626 | Spilogale putorius NC010497 1         | 0,19417652 |
| Vulpes vulpes NC008434 5               | Viverricula indica KX891745 1         | 0,1801872  | Phocarcus hookeri NC008418 1          | 0,19417778 |
| Melogale moschata V0735A 1             | Arctodus simus NC011116 1             | 0,18018773 | Lontra canadensis SRR10409165 1       | 0,19417986 |
| Prionailurus bengalensis CKM45 20      | Lutra lutra LC050126 1                | 0,18018773 | Mustela nigripes NC024942 1           | 0,19418342 |
| Ursus thibetanus laniger MH281753 2    | Martes flavigula NC012141 3           | 0,18018796 | Vulpes zerdia KJ603240 1              | 0,19418459 |
| Mustela putorius NC020638 4            | Genetta servalina NC024568 2          | 0,1801886  | Galidia elegans D146 1                | 0,19418997 |
| Martes foina NC020643 1                | Arctocepalus townsendi NC008420 1     | 0,18018879 | Procyon lotor AB462049 4              | 0,1941902  |
| Ursus spelaeus EU327344 13             | Martes flavigula NC012141 3           | 0,18018913 | Paradoxurus hermaphroditus NLNC 1     | 0,19419053 |

|                                        |                                        |            |
|----------------------------------------|----------------------------------------|------------|
| Melogale moschata KP726273 1           | Lynx pardinus NC028319 161             | 0,18018959 |
| Mustela nigripes NC024942 1            | Felis margarita NC028308 1             | 0,18018973 |
| Viverra tangalunga MH464792 1          | Civettictis civetta GLC19 1            | 0,18018974 |
| Prionailurus viverrinus NC028305 1     | Mustela nigripes NC024942 1            | 0,18019035 |
| Martes americana NC020642 1            | Felis silvestris lybica KP202275 4     | 0,18019132 |
| Mustela putorius NC020638 4            | Catopuma temminckii NC027115 41        | 0,1801914  |
| Potos flavus T414 1                    | Leopardus geoffroyi NC028320 1         | 0,18019302 |
| Prionailurus bengalensis CKM45 20      | Mustela sibirica AP017394 11           | 0,18019336 |
| Monachus monachus NC044972 5           | Lycalopex securus KT448284 1           | 0,18019447 |
| Poecilogale albinucha T602 1           | Genetta servalina NC024568 2           | 0,18019676 |
| Zalophus californianus NC008416 1      | Enhydra lutris NC009692 1              | 0,18019706 |
| Poecilogale albinucha T602 1           | Leopardus pardalis T262 1              | 0,18019712 |
| Leopardus wiedii NC028318 1            | Arctocepalus pusillus NC008417 1       | 0,18019742 |
| Mustela nivalis T306 5                 | Leopardus wiedii NC028318 1            | 0,18019889 |
| Lynx rufus NC014456 3                  | Arctodus simus NC011116 1              | 0,18019925 |
| Viverricula indica XK891745 1          | Ursus thibetanus mupinensis NC008753 2 | 0,18020037 |
| Martes pennanti NC020664 16            | Genetta abyssinica MG489822 1          | 0,18020086 |
| Phoca largha NC008430 1                | Lycalopex securus KT448284 1           | 0,18020111 |
| Ursus thibetanus laniger MH281753 2    | Arctocepalus gazella BK010918 1        | 0,18020125 |
| Ursus thibetanus laniger MH281753 2    | Meles anakuma NC009677 1               | 0,18020573 |
| Martes foina NC020643 1                | Leopardus guigna NC028321 1            | 0,18020581 |
| Ursus thibetanus laniger MH281753 2    | Melogale moschata NC020644 1           | 0,18020733 |
| Potos flavus T414 1                    | Leopardus colocolo NC028314 1          | 0,18020749 |
| Mustela erminea T305 2                 | Melursus ursinus NC009970 2            | 0,18020765 |
| Viverricula indica XK891751 1          | Ursus thibetanus thibetanus NC011118 4 | 0,18021074 |
| Ursus thibetanus thibetanus NC011118 4 | Mustela altaica NC021751 1             | 0,18021147 |
| Phoca vitulina NC001325 1              | Crocuta crocuta NC020670 3             | 0,18021163 |
| Paradoxurus jerdoni MH464793 1         | Canis aureus KT448274 1                | 0,1802119  |
| Zalophus wollebaeki SRR4431565 1       | Ursus thibetanus laniger MH281753 2    | 0,18021472 |
| Viverricula indica NC025296 2          | Mephitis mephitis NC020648 1           | 0,18021613 |
| Taxidea taxus NC020646 1               | Ura javanica/auropunctata NC006835 1   | 0,18022023 |
| Tremarctos ornatus NC009969 2          | Gulo gulo NC009685 3                   | 0,18022418 |
| Ura javanica T413 1                    | Halichoerus grypus NC001602 2          | 0,18022481 |
| Potos flavus T414 1                    | Civettictis civetta NC033378 1         | 0,18022999 |
| Lutra sumatrana NC035810 1             | Conepatus chinga NC042596 1            | 0,18023029 |
| Zalophus californianus NC008416 1      | Ursus spelaeus NC011112 8              | 0,18023206 |
| Martes melampus NC009678 1             | Crossarchus platycephalus C7R66 1      | 0,18023682 |
| Phoca vitulina NC001325 1              | Neofelis nebulosa NC008450 3           | 0,18023698 |
| Meles leucurus NC039173 4              | Arctocepalus forsteri KT693377 17      | 0,1802385  |
| Tremarctos ornatus NC009969 2          | Callorhinus ursinus NC008415 1         | 0,18023935 |
| Viverra tangalunga MH464792 1          | Arctocepalus gazella BK010918 1        | 0,18024322 |
| Poecilogale albinucha T602 1           | Bassaricyon neblina SRX1097850 1       | 0,18024379 |
| Pusa caspica NC008431 1                | Canis anthus NC027956 2                | 0,18024564 |
| Vulpes corsac NC023958 1               | Erignathus barbatus NC008426 1         | 0,1802461  |
| Mustela erminea T305 2                 | Cynictis penicillata T375 1            | 0,18024692 |
| Leopardus jacobita NC028322 1          | Canis adustus KT448271 1               | 0,18024772 |
| Mustela nigripes NC024942 1            | Arctocepalus pusillus NC008417 1       | 0,18024839 |
| Martes martes T302 3                   | Arctocepalus australis MG023139 1      | 0,18024924 |
| Ursus thibetanus laniger MH281753 2    | Gulo gulo NC009685 3                   | 0,18025193 |
| Prionailurus planiceps NC028312 6      | Meles leucurus NC039173 4              | 0,18025215 |
| Meles leucurus T303 3                  | Felis margarita NC028308 1             | 0,18025292 |
| Lutra lutra LC050126 1                 | Leopardus geoffroyi NC028320 1         | 0,18025339 |
| Meles leucurus NC039173 4              | Civettictis civetta GLC19 1            | 0,18025367 |
| Neovison vison NC020641 3              | Mungos mungo MM7 1                     | 0,18025394 |
| Mustela kathiah NC023210 1             | Leopardus tigrinus NC028317 1          | 0,18025453 |
| Puma concolor NC016470 22              | Martes melampus NC009678 1             | 0,18025467 |
| Viverricula indica XK891745 1          | Conepatus chinga NC042596 1            | 0,18025577 |
| Mustela sibirica NC020637 6            | Leopardus pardalis T262 1              | 0,18025585 |
| Ursus arctos GU573491 207              | Melogale moschata KP726273 1           | 0,18025617 |
| Meles leucurus T303 3                  | Leopardus guigna NC028321 1            | 0,1802562  |
| Prionailurus planiceps KY682741 4      | Mustela sibirica NC020637 6            | 0,1802564  |
| Puma yagouaroundi NC028311 1           | Mustela sibirica AP017394 11           | 0,18025671 |
| Genetta servalina NC024568 2           | Ailurus fulgens styani NC009691 1      | 0,18025727 |
| Otocolobus manul NC028323 1            | Mustela sibirica AP017394 11           | 0,18025745 |
| Vulpes lagopus NC026529 3              | Lynx rufus NC014456 3                  | 0,18025765 |
| Panthera onca KP202264 2               | Lynx rufus NC014456 3                  | 0,18025824 |
| Viverra tangalunga MH464792 1          | Catopuma badia NC028300 1              | 0,18025905 |
| Pusa hispida NC 008433 1               | Paradoxurus jerdoni MH464793 1         | 0,18026002 |
| Zalophus wollebaeki SRR4431565 1       | Mustela nigripes NC024942 1            | 0,18026021 |
| Pusa hispida NC 008433 1               | Paradoxurus hermaphroditus NLNC 1      | 0,1802603  |
| Viverra zibetha T609 1                 | Canis aureus KT448274 1                | 0,18026096 |
| Viverricula indica XK891745 1          | Poecilogale albinucha T602 1           | 0,18026364 |
| Prionodon linsang ERR2391707 1         | Neovison vison NC020641 3              | 0,18026404 |
| Ursus spelaeus EU327344 13             | Taxidea taxus NC020646 1               | 0,18026501 |
| Mustela nivalis T306 5                 | Lynx pardinus NC028319 161             | 0,18026528 |
| Ursus thibetanus formosanus NC009331 1 | Melogale moschata KP726273 1           | 0,18026619 |
| Zalophus wollebaeki SRR4431565 1       | Aonyx cinerea NC035814 2               | 0,18026666 |
| Prionailurus planiceps NC028312 6      | Bassariscus sumichrasti SRX1099089 1   | 0,18026698 |
| Leopardus jacobita NC028322 1          | Bassariscus sumichrasti SRX1099089 1   | 0,18026727 |
| Ursus thibetanus mupinensis NC008753 2 | Mustela altaica NC021751 1             | 0,18026778 |
| Mustela putorius NC020638 4            | Mephitis mephitis NC020648 1           | 0,18026859 |
| Lutra lutra NC011358 9                 | Leopardus colocolo NC028314 1          | 0,18026979 |
| Zalophus californianus NC008416 1      | Tremarctos ornatus NC009969 2          | 0,18027006 |
| Ursus thibetanus formosanus NC009331 1 | Meles anakuma NC009677 1               | 0,18027098 |
| Prionailurus rubiginosus NC028304 2    | Ictonyx striatus T299 1                | 0,18027206 |
| Ursus thibetanus thibetanus NC011118 4 | Lutra lutra NC011358 9                 | 0,18027323 |
| Martes martes T302 3                   | Arctocepalus forsteri NC004023 28      | 0,18027416 |
| Zalophus californianus NC008416 1      | Mustela nigripes NC024942 1            | 0,18027452 |
| Zalophus wollebaeki SRR4431565 1       | Ursus thibetanus thibetanus NC011118 4 | 0,18028006 |
| Ursus maritimus GU573488 Svalbard      | Homotherium latidens MF871702 3        | 0,18028219 |
| Mustela erminea T305 2                 | Diplogale hosi MH464790 1              | 0,18028334 |
| Mephitis mephitis NC020648 1           | Hemigale derbyanus MH464791 1          | 0,18028359 |
| Lutra lutra LC050126 1                 | Conepatus chinga NC042596 1            | 0,18028957 |
| Spilogale putorius NC010497 1          | Mustela altaica NC021751 1             | 0,18029265 |
| Mephitis mephitis NC020648 1           | Arctictis binturong T605 2             | 0,18029627 |
| Phoca groenlandica NC008429 54         | Panthera leo NERO 19                   | 0,18029726 |
| Phoca fasciata NC008428 1              | Panthera pardus NC010641 5             | 0,18030241 |
| Nasua nasua NC020647 1                 | Meles meles T303 3                     | 0,18030395 |
| Halichoerus grypus NC001602 2          | Canis aureus KT448274 1                | 0,18030348 |
| Lycalopex securus KT448284 1           | Halichoerus grypus NC001602 2          | 0,18030532 |
| Neophoca cinerea NC008419 1            | Martes melampus NC009678 1             | 0,18030696 |
| Melogale moschata V0735A 1             | Arctocepalus gazella BK010918 1        | 0,18031181 |
| Martes melampus NC009678 1             | Arctotherium sp NC030174 1             | 0,18031694 |

|                                       |                                      |            |
|---------------------------------------|--------------------------------------|------------|
| Panthera uncia NC010638 1             | Arctocepalus forsteri NC004023 28    | 0,19419384 |
| Urocyon littoralis catalinae KP129018 | Arctotherium sp NC030174 1           | 0,19419432 |
| Otocyon megalotis SAF 1 2             | Chrotogale owstoni T607 1            | 0,19419464 |
| Vulpes ferrillata NC027935 1          | Ursus arctos GU573486 5              | 0,19419928 |
| Nasua nasua NC020647 1                | Catopuma badia NC028300 1            | 0,19420379 |
| Procyon lotor AB462046 3              | Crocuta crocuta NC020670 3           | 0,19420524 |
| Canis lupus familiaris NC002008 1231  | Tapirus terrestris T358              | 0,19420741 |
| Ursus arctos GU573491 207             | Panthera leo spelaea XK258452 2      | 0,19421716 |
| Prionodon pardicolor NC024569 2       | Galictis vittata T412 1              | 0,19421989 |
| Odobenus rosmarus NC004029 29         | Leopardus pardalis NC028315 1        | 0,19421995 |
| Odobenus rosmarus NC004029 29         | Leopardus wiedii NC028318 1          | 0,19422017 |
| Lycalopex securus KT448284 1          | Arctocepalus townsendi NC008420 1    | 0,19422692 |
| Lutra sumatrana NC035810 1            | Cuon alpinus NC013445 3              | 0,19422841 |
| Cuon alpinus NC013445 3               | Arctocepalus forsteri KT693377 17    | 0,19423327 |
| Vulpes zerdia KJ603240 1              | Arctocepalus forsteri NC004023 28    | 0,19423947 |
| Ursus americanus JX196366 3           | Speothos venaticus C48 2             | 0,19424543 |
| Martes melampus NC009678 1            | Cynogale bennetti KY117544 1         | 0,19424801 |
| Vulpes lagopus NC026529 3             | Arctocepalus townsendi NC008420 1    | 0,1942496  |
| Urocyon cinereoargenteus NC026723 2   | Arctocepalus australis MG023139 1    | 0,1942526  |
| Lutrogale perspicillata NC035811 1    | Bdeogale nigripes GLC15 1            | 0,19425289 |
| Ursus arctos EU497665 29              | Cynogale bennetti KY117544 1         | 0,19425318 |
| Vulpes zerdia KJ603240 1              | Phocarcus hookeri NC008418 1         | 0,19425388 |
| Urocyon cinereoargenteus NC026723 2   | Neophoca cinerea NC008419 1          | 0,1942562  |
| Ailurus fulgens styani NC009691 1     | Tapirus terrestris T358              | 0,19425844 |
| Urocyon cinereoargenteus NC026723 2   | Hyena hyaena NC020669 1              | 0,19426197 |
| Ursus maritimus NC003428 31           | Suricata suricatta SSM10 1           | 0,19426227 |
| Paradoxurus hermaphroditus NC03959    | Ura brachyura KY117547 1             | 0,19426255 |
| Zalophus wollebaeki SRR4431565 1      | Martes martes T302 3                 | 0,19426797 |
| Odobenus rosmarus NC004029 29         | Suricata suricatta SSM10 1           | 0,19426852 |
| Odobenus rosmarus NC004029 29         | Genetta abyssinica MG489822 1        | 0,19426911 |
| Vulpes corsac NC023958 1              | Ictonyx striatus T299 1              | 0,19427182 |
| Mungos mungo/gambianus SRR77048       | Ailuropoda melanoleuca NC009492 5    | 0,19427255 |
| Neofelis nebulosa NC008450 3          | Cuon alpinus NC013445 3              | 0,19427526 |
| Chrysocyon brachyurus NC024172 1      | Arctocepalus pusillus NC008417 1     | 0,19427577 |
| Hyena hyaena NC020669 1               | Chrysocyon brachyurus NC024172 1     | 0,19427928 |
| Panthera leo spelaea XK258452 2       | Arctocepalus gazella BK010918 1      | 0,19428395 |
| Prionailurus rubiginosus NC028304 2   | Odobenus rosmarus NC004029 29        | 0,19428648 |
| Panthera pardus NC010641 5            | Arctocepalus forsteri NC004023 28    | 0,19429233 |
| Spilogale putorius NC010497 1         | Xenogale naso C07XAR110 1            | 0,19429511 |
| Cuon alpinus NC013445 3               | Arctocepalus australis MG023139 1    | 0,19430046 |
| Spilogale putorius NC010497 1         | Panthera onca KP202264 2             | 0,19430287 |
| Mirounga leonina NC008422 1           | Mellivora capensis T370 1            | 0,1943119  |
| Mellivora capensis T370 1             | Erignathus barbatus NC008426 1       | 0,19431196 |
| Vulpes corsac NC023958 1              | Suricata suricatta SSM10 1           | 0,19431785 |
| Ursus arctos GU573486 5               | Neofelis nebulosa NC008450 3         | 0,19431964 |
| Vulpes corsac NC023958 1              | Ailurus fulgens styani NC009691 1    | 0,19431992 |
| Ursus arctos isabellinus 18B5 2       | Cynogale bennetti KY117544 1         | 0,19432075 |
| Cynogale bennetti KY117544 1          | Arctocepalus pusillus NC008417 1     | 0,19432113 |
| Vulpes zerdia KJ603240 1              | Procyon lotor AB462046 3             | 0,19432263 |
| Nyctereutes procyonoides NC013700 3   | Ailurus fulgens NC011124 1           | 0,19432335 |
| Otocyon megalotis SAF 1 2             | Ailurus fulgens NC011124 1           | 0,19432615 |
| Ursus arctos GU573491 207             | Ura semitorquata MH464789 1          | 0,19432653 |
| Urocyon cinereoargenteus NC026723 2   | Arctodus simus NC011116 1            | 0,19432996 |
| Nasua nasua NC020647 1                | Genetta servalina NC024568 2         | 0,19433172 |
| Panthera uncia NC010638 1             | Arctocepalus gazella BK010918 1      | 0,19433232 |
| Ursus arctos AP012576 6               | Cynogale bennetti KY117544 1         | 0,19433717 |
| Nasua nasua NC020647 1                | Felis chaus NC028307 1               | 0,19433862 |
| Proteles cristata T393 6              | Canis latrans NC008093 7             | 0,19433914 |
| Odobenus rosmarus NC004029 29         | Crossarchus platycephalus C7R66 1    | 0,1943396  |
| Vulpes zerdia KJ603240 1              | Helarctos malayanus NC009968 2       | 0,19434009 |
| Smilodon populator MF871700 1         | Nasua nasua NC020647 1               | 0,19434272 |
| Otaria byronia OTAB 1                 | Chrysocyon brachyurus NC024172 1     | 0,19434901 |
| Odobenus rosmarus NC004029 29         | Mustela nivalis T306 5               | 0,19435126 |
| Lutrogale perspicillata NC035811 1    | Canis lupus chanco NC010340 4        | 0,19435933 |
| Panthera tigris amoyensis NC014770 2  | Galictis vittata T412 1              | 0,19436464 |
| Pusa sibirica NC008432 2              | Mellivora capensis T370 1            | 0,19438006 |
| Urocyon cinereoargenteus NC026723 2   | Attila paludinosus T606 1            | 0,19438611 |
| Panthera uncia KP202269 1             | Conepatus chinga NC042596 1          | 0,19438842 |
| Phoca groenlandica NC008429 54        | Mellivora capensis T370 1            | 0,19438943 |
| Lycalopex securus KT448284 1          | Lontra canadensis SRR10409165 1      | 0,19438984 |
| Ursus arctos GU573486 5               | Cynogale bennetti KY117544 1         | 0,19439454 |
| Panthera leo spelaea XK258452 2       | Cuon alpinus NC013445 3              | 0,1943974  |
| Spilogale putorius NC010497 1         | Panthera leo NERO 19                 | 0,19440408 |
| Prionodon pardicolor NC024569 2       | Neophoca cinerea NC008419 1          | 0,19440687 |
| Lontra canadensis SRR10409165 1       | Arctictis binturong T605 2           | 0,19440831 |
| Salanoia concolor D378 1              | Ailuropoda melanoleuca NC009492 5    | 0,19441187 |
| Phocarcus hookeri NC008418 1          | Arctictis binturong T605 2           | 0,1944142  |
| Mungotictis decemlineata NC027828     | Mephitis mephitis NC020648 1         | 0,19442181 |
| Prionodon linsang ERR2391707 1        | Eumetopias jubatus NC004030 10       | 0,1944344  |
| Meles anakuma NC009677 1              | Tapirus terrestris T358              | 0,19443524 |
| Ursus arctos isabellinus 18B5 2       | Neofelis nebulosa NC008450 3         | 0,194444   |
| Ursus arctos GU573491 207             | Ura javanica/auropunctata NC006835 1 | 0,19444661 |
| Zalophus wollebaeki SRR4431565 1      | Neofelis nebulosa NC008450 3         | 0,19445182 |
| Vulpes ferrillata NC027935 1          | Heligale parvula SRR7637809 1        | 0,19445269 |
| Ursus maritimus NC003428 31           | Cynogale bennetti KY117544 1         | 0,19445536 |
| Ursus maritimus GU573488 Svalbard     | Cynogale bennetti KY117544 1         | 0,19445537 |
| Phocarcus hookeri NC008418 1          | Canis latrans NC008093 7             | 0,19445652 |
| Conepatus chinga NC042596 1           | Canis anthus NC027956 2              | 0,19445841 |
| Paradoxurus jerdoni MH464793 1        | Lontra canadensis SRR10409165 1      | 0,19445984 |
| Vulpes vulpes NC008434 5              | Ursus arctos prinosus MG066703 3     | 0,19446182 |
| Vulpes lagopus NC026529 3             | Ursus arctos prinosus MG066703 3     | 0,19446191 |
| Profelis aurata NC028299 1            | Nasua nasua NC020647 1               | 0,1944745  |
| Proteles cristata T393 6              | Procyon lotor AB462046 3             | 0,19447631 |
| Panthera tigris amoyensis NC014770 2  | Lutrogale perspicillata NC035811 1   | 0,19447941 |
| Odobenus rosmarus NC004029 29         | Hemigale derbyanus MH464791 1        | 0,19448167 |
| Panthera pardus NC010641 5            | Cuon alpinus NC013445 3              | 0,19448628 |
| Lycalopex securus KT448284 1          | Arctocepalus forsteri NC004023 28    | 0,19448835 |
| Panthera tigris NC010642 35           | Ailuropoda melanoleuca NC009492 5    | 0,19449019 |
| Neofelis nebulosa NC008450 3          | Canis mesomelas KT448280 1           | 0,19449027 |
| Cuon alpinus NC013445 3               | Callorhinus ursinus NC008415 1       | 0,19450061 |
| Vulpes corsac NC023958 1              | Arctocepalus townsendi NC008420 1    | 0,19451825 |
| Vulpes ferrillata NC027935 1          | Meles leucurus NC039173 4            | 0,1945197  |
| Vulpes lagopus NC026529 3             | Arctocepalus australis MG023139 1    | 0,19451988 |

|                                        |                                       |            |
|----------------------------------------|---------------------------------------|------------|
| Tremarctos ornatus NC009969 2          | Arctocepalus pusillus NC008417 1      | 0,18031782 |
| Eumetopias jebatus NC004030 10         | Acinonyx jubatus NC005212 3           | 0,18031804 |
| Conepatus chinga NC024596 1            | Ailurus fulgens styani NC009691 1     | 0,18031891 |
| Puma concolor NC016470 22              | Meles anakuma NC009677 1              | 0,18031989 |
| Prionailurus rubiginosus NC028304 2    | Arctonyx collaris NC020645 1          | 0,18032031 |
| Paguma larvata PDD511 2                | Meles meles T303 3                    | 0,18032046 |
| Meles anakuma NC009677 1               | Leptailurus serval NC028316 1         | 0,18032086 |
| Salanoia concolor D378 1               | Melogale moschata NC020644 1          | 0,18032096 |
| Martes foina NC020643 1                | Fossa fossana D350 1                  | 0,18032195 |
| Phoca fasciata NC008428 1              | Canis anthus NC027956 2               | 0,18032214 |
| Puma yagouaroundi NC028311 1           | Ailurus fulgens NC011124 1            | 0,18032251 |
| Mustela kathiah NC023210 1             | Arctotherium sp NC030174 1            | 0,18032335 |
| Prionailurus planiceps KY682741 4      | Neogale eversmannii NC028013 1        | 0,18032379 |
| Ursus spelaeus NC011112 8              | Martes flavigula NC012141 3           | 0,18032381 |
| Viverra tangalunga MH464792 1          | Genetta servalina NC024568 2          | 0,18032417 |
| Speothos venaticus C48 2               | Cystophora cristata NC008427 1        | 0,18032421 |
| Phoca groenlandica NC008429 54         | Paradoxurus hermaphroditus NC039591 1 | 0,18032455 |
| Monachus schauinslandi NC008421 1      | Xenogale naso C07XAR110 1             | 0,18032475 |
| Prionailurus planiceps KY682741 4      | Potos flavius T414 1                  | 0,18032481 |
| Prionailurus planiceps NC028312 6      | Potos flavius T414 1                  | 0,18032482 |
| Viverra zibetha T609 1                 | Ailurus fulgens styani NC009691 1     | 0,18032485 |
| Vulpes lagopus NC026529 3              | Pusa hispida NC 008433 1              | 0,18032555 |
| Potos flavius T414 1                   | Leopardus tigrinus NC028317 1         | 0,18032666 |
| Ursus maritimus GU573488 Svalbard      | Mustela sibirica NC020637 6           | 0,18032727 |
| Martes pennanti NC020664 16            | Lynx lynx NC027083 4                  | 0,18033125 |
| Ursus tibetanus mupiniensis NC008753 2 | Mustela kathiah NC023210 1            | 0,18033166 |
| Melogale moschata NC020644 1           | Lynx pardinus NC028319 161            | 0,18033168 |
| Helarctos malayanus NC009968 2         | Callorhinus ursinus NC008415 1        | 0,18033311 |
| Ursus spelaeus EU327344 13             | Martes melampus NC009678 1            | 0,18033433 |
| Puma concolor NC016470 22              | Bassariscus sumichrasti SRX1099089 1  | 0,18033494 |
| Mustela eversmannii NC028013 1         | Mephitis mephitis NC020648 1          | 0,18033542 |
| Prionailurus rubiginosus NC028304 2    | Arctodus simus NC011116 1             | 0,18033566 |
| Phoca largha NC008430 1                | Lycodon pictus NC028427 2             | 0,18033558 |
| Panthera pardus japonensis KJ866876 8  | Canis adustus KT448271 1              | 0,18033603 |
| Neovison vison NC020641 3              | Leopardus geoffroyi NC028320 1        | 0,18033692 |
| Prionodon pardicolor NC024569 2        | Lobodon carinophaga NC008423 1        | 0,18034041 |
| Ursus spelaeus NC011112 8              | Mustela putorius NC020638 4           | 0,18034324 |
| Smilodon populator MF871700 1          | Ailurus fulgens styani NC009691 1     | 0,18034503 |
| Viverricula indica KX891745 1          | Helarctos malayanus NC009968 2        | 0,18034644 |
| Panthera pardus NC010641 5             | Halichoerus grypus NC001602 2         | 0,18034944 |
| Viverra tangalunga MH464792 1          | Eumetopias jubatus NC004030 10        | 0,18035004 |
| Martes flavigula NC012141 3            | Fossa fossana D350 1                  | 0,18035026 |
| Viverricula indica KX891745 1          | Mephitis mephitis NC020648 1          | 0,18035319 |
| Hemigalus derbyanus MH464791 1         | Chrysocyon brachyurus NC024172 1      | 0,18035428 |
| Lutra lutra NC011358 9                 | Conepatus chinga NC024596 1           | 0,18035592 |
| Spilogale putorius NC010497 1          | Mustela putorius NC020638 4           | 0,18035649 |
| Mustela arctos NC020638 4              | Canis lupus chanco NC010340 4         | 0,18035664 |
| Ursus arctos EU497665 29               | Hemigalus derbyanus MH464791 1        | 0,18035983 |
| Civettictis civetta GLC19 1            | Canis lupus chanco NC010340 4         | 0,18036072 |
| Mustela frenata NC020640 1             | Cuon alpinus NC013445 3               | 0,18036211 |
| Ursus maritimus NC003428 31            | Homotherium latidens MF871702 3       | 0,18036233 |
| Lynx pardinus NC028319 161             | Gulo gulo NC009685 3                  | 0,18036415 |
| Martes martes T302 3                   | Civettictis civetta NC033378 1        | 0,18036571 |
| Spilogale putorius NC010497 1          | Paradoxurus hermaphroditus NLNC 1     | 0,18036748 |
| Pusa hispida NC 008433 1               | Neofelis nebulosa NC008450 3          | 0,18037049 |
| Viverricula indica NC025296 2          | Eumetopias jubatus NC004030 10        | 0,18037193 |
| Lutra lutra LC050126 1                 | Arctocepalus australis MG023139 1     | 0,18037295 |
| Nasua nasua NC020647 1                 | Mustela kathiah NC023210 1            | 0,18037336 |
| Phocarcotus hookeri NC008418 1         | Martes melampus NC009678 1            | 0,18037416 |
| Mirounga angustirostris SRR10331586 1  | Canis mesomelas KT448280 1            | 0,18037483 |
| Mustela sibirica AP017394 11           | Crossarchus platycephalus CR66 1      | 0,18037637 |
| Ursus tibetanus mupiniensis NC008753 2 | Eumetopias jubatus NC004030 10        | 0,18037823 |
| Mustela frenata NC020640 1             | Mungos mungo MMC7 1                   | 0,18037848 |
| Potos flavius T414 1                   | Neophoca cinerea NC008419 1           | 0,18038182 |
| Martes zibellina NC011579 39           | Conepatus chinga NC024596 1           | 0,18038221 |
| Mustela kathiah NC023210 1             | Canis latrans NC008093 7              | 0,18038575 |
| Meles meles T303 3                     | Lynx rufus NC014456 3                 | 0,18038587 |
| Enhydra lutris NC009692 1              | Catopuma badia NC028300 1             | 0,18038595 |
| Panthera tigris amoyensis NC014770 2   | Halichoerus grypus NC001602 2         | 0,18038662 |
| Prionailurus planiceps NC028312 6      | Meles meles T303 3                    | 0,18038726 |
| Lutra lutra LC050126 1                 | Leopardus pardalis NC028315 1         | 0,18038762 |
| Ursus arctos pruinosus MG066703 3      | Hemigalus derbyanus MH464791 1        | 0,18038802 |
| Puma yagouaroundi NC028311 1           | Martes melampus NC009678 1            | 0,18038942 |
| Phoca groenlandica NC008429 54         | Xenogale naso C07XAR110 1             | 0,18038952 |
| Zalophus wollebaeki SRR4431565 1       | Viverra tangalunga MH464792 1         | 0,18039031 |
| Viverra zibetha T609 1                 | Mustela putorius NC020638 4           | 0,18039036 |
| Puma yagouaroundi NC028311 1           | Mustela kathiah NC023210 1            | 0,18039055 |
| Lutra sumatrana NC035810 1             | Leopardus pardalis NC028315 1         | 0,18039111 |
| Viverra zibetha T609 1                 | Mustela itatsi NC034330 19            | 0,18039112 |
| Melogale moschata V0735A 1             | Lynx canadensis NC028313 1            | 0,18039122 |
| Melogale moschata V0735A 1             | Leopardus pardalis NC028315 1         | 0,18039237 |
| Pusa hispida NC 008433 1               | Nyctereutes procyonoides NC013700 3   | 0,1803925  |
| Taxidea taxus NC020646 1               | Mephitis mephitis NC020648 1          | 0,18039399 |
| Melogale moschata KP726273 1           | Leopardus geoffroyi NC028320 1        | 0,18039444 |
| Nyctereutes procyonoides NC013700 3    | Leopardus pardalis T262 1             | 0,18039502 |
| Lynx pardinus NC028319 161             | Bassariscus sumichrasti SRX1099089 1  | 0,18039757 |
| Proteles cristata T393 6               | Eryngathus barbatus NC008426 1        | 0,18039867 |
| Nandania binotata NC024567 1           | Chrysocyon brachyurus NC024172 1      | 0,18039888 |
| Prionailurus viverrinus NC028305 1     | Martes martes T302 3                  | 0,18040068 |
| Ursus arctos GU573486 5                | Mustela sibirica NC020637 6           | 0,18040103 |
| Prionailurus planiceps KY682741 4      | Bassariscus sumichrasti SRX1099089 1  | 0,18040149 |
| Mustela nivalis T306 5                 | Leptailurus serval NC028316 1         | 0,18040207 |
| Mustela eversmannii NC028013 1         | Canis adustus KT448271 1              | 0,18040217 |
| Meles anakuma NC009677 1               | Leopardus colocolo NC028314 1         | 0,18040535 |
| Melursus ursinus NC009970 2            | Martes americana NC020642 1           | 0,18040572 |
| Lycodon pictus NC028427 2              | Hemigalus derbyanus MH464791 1        | 0,18040629 |
| Martes foina NC020643 1                | Leopardus tigrinus NC028317 1         | 0,18040708 |
| Paradoxurus hermaphroditus NLNC 1      | Canis aureus KT448274 1               | 0,18040749 |
| Zalophus californianus NC008416 1      | Martes americana NC020642 1           | 0,18040797 |
| Paradoxurus jerdoni MH464793 1         | Bassariscus sumichrasti SRX1099089 1  | 0,18040925 |
| Gulo gulo NC009685 3                   | Arctocepalus forsteri KT693377 17     | 0,18040961 |
| Leopardus pardalis NC028315 1          | Chrysocyon brachyurus NC024172 1      | 0,18041667 |
| Martes martes T302 3                   | Acinonyx jubatus NC005212 3           | 0,180418   |

|                                       |                                       |            |
|---------------------------------------|---------------------------------------|------------|
| Parahaena brunnea NC038159 15         | Cuon alpinus NC013445 3               | 0,1945221  |
| Phoca fasciata NC008428 1             | Mellivora capensis T370 1             | 0,19452333 |
| Prionodon linsang ERR2391707 1        | Aonyx cinerea NC035814 2              | 0,19452447 |
| Panthera onca NC022842 1              | Cuon alpinus NC013445 3               | 0,19452602 |
| Paradoxurus hermaphroditus NC03959    | Martes zibellina NC011579 39          | 0,19452788 |
| Urocyon cinereoargenteus NC026723     | Paradoxurus jerdoni MH464793 1        | 0,19453397 |
| Speothos venaticus C48 2              | Galidia elegans D146 1                | 0,19453442 |
| Lutrogale perspicillata NC035811 1    | Canis aureus KT448274 1               | 0,19454484 |
| Ursus arctos pruinosus MG066703 3     | Panthera tigris amoyensis NC014770 2  | 0,19455193 |
| Otocyon megalotis SAF 1 2             | Galictis vittata T412 1               | 0,19455576 |
| Neofelis nebulosa NC008450 3          | Arctocepalus forsteri KT693377 17     | 0,19456908 |
| Neofelis nebulosa NC008450 3          | Canis anthus NC027956 2               | 0,1945719  |
| Spilogale putorius NC010497 1         | Panthera uncia KP202269 1             | 0,19457228 |
| Ursus arctos EU497665 29              | Neofelis nebulosa NC008450 3          | 0,19457923 |
| Ursus americanus JX196366 3           | Proteles cristata T393 6              | 0,19458023 |
| Vulpes vulpes NC008434 5              | Meles anakuma NC009677 1              | 0,19458948 |
| Urocyon littoralis catalinae KP129018 | Galidictis fasciata DM333 1           | 0,19459043 |
| Vulpes ferrillata NC027935 1          | Neophoca cinerea NC008419 1           | 0,19459186 |
| Ursus arctos isabellinus 1885 2       | Ura semitorquata MH464789 1           | 0,19459595 |
| Vulpes ferrillata NC027935 1          | Hyaina hyaina NC020669 1              | 0,19459735 |
| Vulpes ferrillata NC027935 1          | Ichneumia albicauda T603 1            | 0,19460087 |
| Urocyon cinereoargenteus NC026723 3   | Paradoxurus hermaphroditus NC03959    | 0,19460161 |
| Panthera leo spelaea KX258452 2       | Arctocepalus forsteri NC004023 28     | 0,19460881 |
| Prionailurus bengalensis NC028301 12  | Odobenus rosarum NC004029 29          | 0,19462231 |
| Proteles cristata T393 6              | Canis lupus chanco NC010340 4         | 0,19463091 |
| Ursus americanus JX196366 3           | Nasua nasua NC020647 1                | 0,19463633 |
| Tremarctos ornatus NC009969 2         | Neofelis nebulosa NC008450 3          | 0,19463889 |
| Speothos venaticus C48 2              | Eumetopias jubatus NC004030 10        | 0,19465023 |
| Mustela putorius NC020638 4           | Tapirus terrestris T358               | 0,19465038 |
| Vulpes ferrillata NC027935 1          | Arctocepalus australis MG023139 1     | 0,19465473 |
| Ursus arctos GU573486 5               | Ura javanica/auropunctata NC006835    | 0,19465505 |
| Urocyon littoralis catalinae KP129018 | Attilax paludinosus T606 1            | 0,19465537 |
| Vulpes corsac NC023958 1              | Phocarcotus hookeri NC008418 1        | 0,19465765 |
| Urocyon littoralis catalinae KP129018 | Phocarcotus hookeri NC008418 1        | 0,19465913 |
| Ursus maritimus GU573488 Svalbard     | Ura semitorquata MH464789 1           | 0,19466312 |
| Suricata suricatta SSM10 1            | Otocyon megalotis SAF 1 2             | 0,19466327 |
| Vulpes lagopus NC026529 3             | Poecilogale albicauda T602 1          | 0,19466357 |
| Vulpes ferrillata NC027935 1          | Ursus arctos pruinosus MG066703 3     | 0,19466469 |
| Ursus arctos EU497665 29              | Ura brachyura KY117547 1              | 0,19466656 |
| Odobenus rosarum NC004029 29          | Conepatus chinga NC024596 1           | 0,19466667 |
| Otocyon megalotis SAF 1 2             | Lutrogale perspicillata NC035811 1    | 0,19466707 |
| Bassariscus sumichrasti SRX1099089    | Tapirus terrestris T358               | 0,19466732 |
| Lutrogale perspicillata NC035811 1    | Ichneumia albicauda T603 1            | 0,19466843 |
| Ursus arctos GU573486 5               | Ura semitorquata MH464789 1           | 0,19466956 |
| Panthera onca KP202264 2              | Bassariscus neblina SRX1097850 1      | 0,19467427 |
| Galictis vittata T412 1               | Canis mesomelas KT448280 1            | 0,19467646 |
| Felis chaus NC028307 1                | Bassariscus neblina SRX1097850 1      | 0,19467905 |
| Panthera tigris NC010642 35           | Lutrogale perspicillata NC035811 1    | 0,1946816  |
| Canis aureus KT448274 1               | Bassariscus neblina SRX1097850 1      | 0,19470643 |
| Prionodon pardicolor NC024569 2       | Arctocepalus forsteri NC004023 28     | 0,19472279 |
| Nasua nasua NC020647 1                | Mungos mungo MMC7 1                   | 0,19472493 |
| Melursus ursinus NC009970 2           | Cuon alpinus NC013445 3               | 0,19472998 |
| Urocyon littoralis catalinae KP129018 | Paradoxurus jerdoni MH464793 1        | 0,19473597 |
| Cryptoprocta ferox CFC13 1            | Tapirus terrestris T358               | 0,19473974 |
| Nasua nasua NC020647 1                | Leopardus jacobita NC028322 1         | 0,19474204 |
| Speothos venaticus C48 2              | Hyaina hyaina NC020669 1              | 0,19474448 |
| Panthera leo spelaea KX258452 2       | Arctocepalus townsendi NC008420 1     | 0,19475286 |
| Panthera tigris NC010642 35           | Galictis vittata T412 1               | 0,19476889 |
| Hyaina hyaina NC020669 1              | Cuon alpinus NC013445 3               | 0,19478288 |
| Urocyon cinereoargenteus NC026723 3   | Lontra canadensis SRR10409165 1       | 0,19478965 |
| Vulpes ferrillata NC027935 1          | Suricata suricatta SSM10 1            | 0,19478965 |
| Nyctereutes procyonoides NC013700 3   | Lutrogale perspicillata NC035811 1    | 0,19479063 |
| Speothos venaticus C48 2              | Lutra lutra NC011358 9                | 0,19479387 |
| Prionodon linsang ERR2391707 1        | Otocyon megalotis SAF 1 2             | 0,19479731 |
| Urocyon littoralis catalinae KP129018 | Hyaina hyaina NC020669 1              | 0,19480062 |
| Urocyon littoralis catalinae KP129018 | Arctodus simus NC011116 1             | 0,19480133 |
| Otocyon megalotis SAF 1 2             | Bassariscus neblina SRX1097850 1      | 0,19480309 |
| Proteles cristata T393 6              | Lontra canadensis SRR10409165 1       | 0,19480525 |
| Ursus arctos AP012576 6               | Ura semitorquata MH464789 1           | 0,19481528 |
| Crocota arota NC020670 3              | Ailurus fulgens styani NC009691 1     | 0,19481562 |
| Ursus arctos EU497665 29              | Speothos venaticus C48 2              | 0,19481574 |
| Lycalopex schuerei KT448284 1         | Nyctereutes procyonoides CFC13 1      | 0,19482453 |
| Ursus americanus JX196366 3           | Nyctereutes procyonoides NC013700 3   | 0,19483435 |
| Ursus maritimus GU573488 Svalbard     | Ura javanica/auropunctata NC006835    | 0,19485082 |
| Urocyon cinereoargenteus NC026723 3   | Galidictis fasciata DM333 1           | 0,1948598  |
| Ursus arctos AP012576 6               | Ura javanica/auropunctata NC006835    | 0,19486657 |
| Vulpes ferrillata NC027935 1          | Ursus arctos GU573491 207             | 0,19486666 |
| Ursus arctos GU573491 207             | Suricata suricatta SSM10 1            | 0,19486825 |
| Martes martes T302 3                  | Cynogale bennetti KY117544 1          | 0,19486906 |
| Speothos venaticus C48 2              | Lutra sumatrana NC035810 1            | 0,19486909 |
| Urocyon littoralis catalinae KP129018 | Paradoxurus hermaphroditus NC03959    | 0,19487095 |
| Paradoxurus hermaphroditus NC03959    | Otocyon megalotis SAF 1 2             | 0,19487143 |
| Vulpes ferrillata NC027935 1          | Ursus arctos AP012576 6               | 0,1948797  |
| Melursus ursinus NC009970 2           | Bdeogale nigripes GLC15 1             | 0,19488132 |
| Ursus arctos AP012576 6               | Ura brachyura KY117547 1              | 0,19488508 |
| Ursus arctos GU573491 207             | Panthera tigris amoyensis NC014770 2  | 0,19488819 |
| Panthera uncia NC010638 1             | Melursus ursinus NC009970 2           | 0,19489543 |
| Ursus americanus JX196366 3           | Urocyon littoralis catalinae KP129018 | 0,19490284 |
| Urocyon littoralis catalinae KP129018 | Arctocepalus forsteri NC004023 28     | 0,19490956 |
| Spilogale putorius NC010497 1         | Salanoia concolor D378 1              | 0,19491833 |
| Vulpes ferrillata NC027935 1          | Arctocepalus forsteri KT693377 17     | 0,19492404 |
| Urocyon cinereoargenteus NC026723 3   | Xenogale naso C07XAR110 1             | 0,19492507 |
| Vulpes vulpes NC008434 5              | Ailurus fulgens styani NC009691 1     | 0,19492562 |
| Panthera tigris NC010642 35           | Cuon alpinus NC013445 3               | 0,19492741 |
| Urocyon cinereoargenteus NC026723 3   | Prionodon linsang ERR2391707 1        | 0,19492827 |
| Ursus arctos EU497665 29              | Ura semitorquata MH464789 1           | 0,19493245 |
| Ursus arctos GU573491 207             | Ura brachyura KY117547 1              | 0,19493574 |
| Prionodon pardicolor NC024569 2       | Arctocepalus townsendi NC008420 1     | 0,19493814 |
| Viverra zibetha T609 1                | Nasua nasua NC020647 1                | 0,1949382  |
| Vulpes ferrillata NC027935 1          | Parahaena brunnea NC038159 15         | 0,19493988 |
| Panthera onca KP202264 2              | Nasua nasua NC020647 1                | 0,19494152 |
| Vulpes zerda KJ603240 1               | Proteles cristata T393 6              | 0,19494317 |
| Vulpes ferrillata NC027935 1          | Ictonyx striatus T299 1               | 0,19494528 |

|                                        |                                        |            |
|----------------------------------------|----------------------------------------|------------|
| Ursus arctos AP012576 6                | Hemigalus derbyanus MH464791 1         | 0,18042213 |
| Spilogale putorius NC010497 1          | Mustela itatsi NC034330 19             | 0,18042439 |
| Prionailurus bengalensis NC028301 12   | Canis lupus familiaris NC002008 1231   | 0,18042675 |
| Ommatophoca rossii AY377287etc 1       | Felis catus NC001700 2                 | 0,18042684 |
| Homotherium latidens MF871702 3        | Canis latrans NC008093 7               | 0,18042772 |
| Viverra zibetha T609 1                 | Canis lupus chanco NC010340 4          | 0,18043007 |
| Phoca largha NC008430 1                | Canis lupus chanco NC010340 4          | 0,18043421 |
| Halichoerus grypus NC001602 2          | Gallidia elegans D146 1                | 0,18043931 |
| Ursus arctos AP012576 6                | Homotherium latidens MF871702 3        | 0,18043931 |
| Meles anakuma NC009677 1               | Chrotogale owstoni T607 1              | 0,18043955 |
| Catopuma temminckii NC027115 41        | Canis lupus chanco NC010340 4          | 0,18043964 |
| Nasua nasua NC020647 1                 | Mustela itatsi NC034330 19             | 0,18044133 |
| Mungos mungo MMCT 1                    | Meles meles T303 3                     | 0,18044314 |
| Tremarctos ornatus NC009969 2          | Melogale moschata KP726273 1           | 0,18044502 |
| Pusa caspica NC008431 1                | Helogale parvula SRR7637809 1          | 0,18044707 |
| Martes americana NC020642 1            | Arctocephalus pusillus NC008417 1      | 0,18044734 |
| Chrotogale owstoni T607 1              | Arctocephalus pusillus NC008417 1      | 0,18044822 |
| Mustela putorius NC020638 4            | Arctocephalus pusillus NC008417 1      | 0,18044981 |
| Ursus americanus JX196366 3            | Neovison vison NC020641 3              | 0,18044981 |
| Melogale moschata NC020644 1           | Fossa fossana D350 1                   | 0,18045035 |
| Nandinia binotata NC024567 1           | Lutrogale perspicillata NC035811 1     | 0,18045166 |
| Otaria byronia OTAB 1                  | Nandinia binotata NC024567 1           | 0,18045209 |
| Cynogale bennetti KY117544 1           | Canis adustus KT448271 1               | 0,18045222 |
| Mustela nigripes NC024942 1            | Canis latrans NC008093 7               | 0,18045256 |
| Potos flavus T414 1                    | Paradoxurus jerdoni MH464793 1         | 0,18045311 |
| Meles meles T303 3                     | Leopardus pardalis NC028315 1          | 0,18045354 |
| Paguma larvata PDD511 2                | Meles anakuma NC009677 1               | 0,18045391 |
| Lutra lutra LC050126 1                 | Felis silvestris lybica KP202275 4     | 0,18045394 |
| Meles meles T303 3                     | Leopardus tigrinus NC028317 1          | 0,18045424 |
| Meles meles T303 3                     | Felis nigripes NC028309 1              | 0,18045473 |
| Lutra lutra NC0011358 9                | Leopardus pardalis NC028315 1          | 0,18045501 |
| Prionailurus viverrinus NC028305 1     | Enhydra lutris NC009692 1              | 0,18045527 |
| Mustela kathiah NC023210 1             | Lynx lynx NC027083 4                   | 0,18045564 |
| Panthera leo NERO 19                   | Monachus monachus NC044972 5           | 0,18045601 |
| Viverra zibetha MH464792 1             | Lynx rufus NC014456 3                  | 0,18045698 |
| Martes melampus NC009678 1             | Felis margarita NC028308 1             | 0,18045764 |
| Mustela kathiah NC023210 1             | Genetta servalina NC024568 2           | 0,18045792 |
| Martes melampus NC009678 1             | Felis chaus NC028307 1                 | 0,18045822 |
| Paradoxurus hermaphroditus NLNC 1      | Mustela nigripes NC024942 1            | 0,18045825 |
| Mustela itatsi NC034330 19             | Leopardus wiedii NC028318 1            | 0,18045837 |
| Viverra zibetha MH464792 1             | Felis margarita NC028308 1             | 0,18045853 |
| Puma yagouaroundi NC028311 1           | Mustela itatsi NC034330 19             | 0,18045893 |
| Martes americana NC020642 1            | Arctocephalus sp NC030174 1            | 0,18045928 |
| Puma yagouaroundi NC028311 1           | Canis aureus KT448274 1                | 0,18045999 |
| Mustela erminea T305 2                 | Felis catus NC001700 2                 | 0,18046002 |
| Mustela eversmannii NC028013 1         | Catopuma temminckii NC027115 41        | 0,18046077 |
| Prionailurus rubiginosus NC028304 2    | Martes americana NC020642 1            | 0,18046082 |
| Ursus maritimus NC003428 31            | Mustela sibirica NC020637 6            | 0,18046193 |
| Zalophus wolfebaeki SRR4431565 1       | Martes americana NC020642 1            | 0,18046261 |
| Prionailurus rubiginosus NC028304 2    | Canis latrans NC008093 7               | 0,18046308 |
| Prionailurus bengalensis NC028301 12   | Canis latrans NC008093 7               | 0,18046369 |
| Phoca groenlandica NC008429 54         | Panthera onca KP202264 2               | 0,18046655 |
| Mustela altaica NC021751 1             | Felis silvestris lybica KP202275 4     | 0,18046677 |
| Lycalopex schuhræi KT448284 1          | Hemigalus derbyanus MH464791 1         | 0,18046755 |
| Neophoca cinerea NC008419 1            | Homotherium latidens MF871702 3        | 0,18046798 |
| Ursus thibetanus mupinensis NC008753 2 | Givettictis civetta GLC19 1            | 0,1804692  |
| Viverricula indica XK891745 1          | Ursus thibetanus mupinensis NC008753 2 | 0,18047003 |
| Prionailurus bengalensis NC028301 12   | Bassariscus sumichrasti SRX1099089 1   | 0,18047182 |
| Halichoerus grypus NC001602 2          | Canis lupus chanco NC010340 4          | 0,18047351 |
| Ursus arctos AP012576 6                | Nandinia binotata NC024567 1           | 0,18047516 |
| Ailurus fulgens styani NC009691 1      | Ailuropoda melanoleuca NC009492 5      | 0,18047772 |
| Melogale moschata V0735A 1             | Leopardus colocolo NC028314 1          | 0,18047813 |
| Ursus spelaeus EU327344 13             | Mustela nigripes NC024942 1            | 0,18047884 |
| Ursus thibetanus thibetanus NC011118 4 | Martes martes T302 3                   | 0,18048058 |
| Viverra zibetha T609 1                 | Helarctos malayanus NC009968 2         | 0,18048118 |
| Ursus americanus JX196366 3            | Taxidea taxus NC020646 1               | 0,18048155 |
| Helogale parvula SRR7637809 1          | Halichoerus grypus NC001602 2          | 0,1804958  |
| Prionailurus planiceps NC028312 6      | Martes flavigula NC012141 3            | 0,18050091 |
| Neofelis nebulosa NC008450 3           | Lobodon carolinophaga NC008423 1       | 0,18050599 |
| Hydrurga leptonyx NC008425 1           | Tapirus terrestris T358                | 0,18051    |
| Lontra canadensis SRR10409165 1        | Ailurus fulgens styani NC009691 1      | 0,18051241 |
| Martes americana NC020642 1            | Arctocephalus forsteri KT693377 17     | 0,18051301 |
| Martes sibirica NC011579 39            | Arctocephalus australis MG023139 1     | 0,18051301 |
| Phocarcos hookeri NC008418 1           | Nandinia binotata NC024567 1           | 0,18051311 |
| Vulpes lagopus NC026529 3              | Cystophora cristata NC008427 1         | 0,18051483 |
| Cystophora cristata NC008427 1         | Canis anthus NC027956 2                | 0,18051535 |
| Pusa caspica NC008431 1                | Nyctereutes procyonoides NC013700 3    | 0,18051566 |
| Pusa caspica NC008431 1                | Gallidia elegans D146 1                | 0,18051703 |
| Procyon lotor AB462046 3               | Neophoca cinerea NC008419 1            | 0,18051948 |
| Prionailurus bengalensis NC028301 12   | Lutra lutra LC050126 1                 | 0,18052009 |
| Leopardus pardalis T262 1              | Enhydra lutris NC009692 1              | 0,18052204 |
| Arctocephalus pusillus NC008417 1      | Ailurus fulgens NC011124 1             | 0,18052205 |
| Melogale moschata KP726273 1           | Arctotherium sp NC030174 1             | 0,18052216 |
| Melogale moschata V0735A 1             | Arctotherium sp NC030174 1             | 0,18052235 |
| Potos flavus T414 1                    | Genetta servalina NC024568 2           | 0,18052337 |
| Paradoxurus hermaphroditus NC039591 1  | Meles leucurus NC039173 4              | 0,18052344 |
| Caracal caracal NC028306 1             | Callorhinus ursinus NC008415 1         | 0,18052368 |
| Procyon lotor AB462049 4               | Ailurus fulgens styani NC009691 1      | 0,18052375 |
| Mustela eversmannii NC028013 1         | Lynx lynx NC027083 4                   | 0,18052413 |
| Viverricula indica XK891745 1          | Mustela sibirica NC020637 6            | 0,18052441 |
| Phoca groenlandica NC008429 54         | Urva javanica T413 1                   | 0,18052442 |
| Martes flavigula NC012141 3            | Helarctos malayanus NC009968 2         | 0,1805246  |
| Panthera pardus NC010641 5             | Monachus monachus NC044972 5           | 0,1805246  |
| Leopardus pardalis NC028315 1          | Callorhinus ursinus NC008415 1         | 0,18052517 |
| Meles anakuma NC009677 1               | Leopardus geoffroyi NC028320 1         | 0,18052538 |
| Paradoxurus jerdoni MH464793 1         | Mustela kathiah NC023210 1             | 0,18052539 |
| Prionailurus rubiginosus NC028304 2    | Lutra sumatrana NC035810 1             | 0,18052551 |
| Mustela sibirica NC020637 6            | Felis silvestris lybica KP202275 4     | 0,18052588 |
| Catopuma temminckii NC027115 41        | Arctonyx collaris NC020645 1           | 0,18052651 |
| Viverricula indica XK891745 1          | Ailurus fulgens NC011124 1             | 0,18052678 |
| Viverricula indica XK891751 1          | Ailurus fulgens styani NC009691 1      | 0,18052733 |
| Paguma larvata PDD511 2                | Ailurus fulgens styani NC009691 1      | 0,18052775 |
| Ursus arctos EU497665 29               | Meles meles T303 3                     | 0,18052834 |

|                                        |                                      |            |
|----------------------------------------|--------------------------------------|------------|
| Urocyon littoralis catalinae KP129018  | Panthera onca NC022842 1             | 0,19494943 |
| Galidictis fasciata DM333 1            | Ailuropoda melanoleuca NC009492 5    | 0,19495222 |
| Ursus arctos AP012576 6                | Suricata suricatta SSM10 1           | 0,19495261 |
| Cuon alpinus NC013445 3                | Arctocephalus forsteri NC004023 28   | 0,1949576  |
| Odocoileus manul NC028323 1            | Odobenus rosmarus NC004029 29        | 0,19495893 |
| Ursus thibetanus laniger MH281753 2    | Crocota crocata NC020670 3           | 0,19496226 |
| Neofelis nebulosa NC008450 3           | Lutrogale perspicillata NC035811 1   | 0,19497426 |
| Urocyon cinereogargenteus NC026723 2   | Arctocephalus forsteri NC004023 28   | 0,19497716 |
| Vulpes vulpes NC008434 5               | Lutrogale perspicillata NC035811 1   | 0,19499108 |
| Ailurus fulgens NC011124 1             | Tapirus terrestris T358              | 0,19499999 |
| Ursus arctos pruinusos MG066703 3      | Suricata suricatta SSM10 1           | 0,19500314 |
| Urocyon cinereogargenteus NC026723 2   | Paradoxurus hermaphroditus NLNC 1    | 0,19500522 |
| Ursus thibetanus laniger MH281753 2    | Urocyon cinereogargenteus NC026723 2 | 0,19501697 |
| Ursus thibetanus thibetanus NC011118 4 | Urocyon cinereogargenteus NC026723 2 | 0,19501738 |
| Vulpes zerdia KJ603240 1               | Urva javanica/auropunctata NC006835  | 0,19502975 |
| Ursus arctos AP012576 6                | Panthera tigris amoyensis NC014770 2 | 0,19503553 |
| Vulpes vulpes NC008434 5               | Cynogale bennetti KY117544 1         | 0,19505173 |
| Vulpes ferrillata NC027935 1           | Arctocephalus forsteri NC004023 28   | 0,19505195 |
| Galictis vittata T412 1                | Cuon alpinus NC013445 3              | 0,19505911 |
| Vulpes lagopus NC026529 3              | Procyon lotor AB462049 4             | 0,19506325 |
| Chrysoyon brachyurus NC024172 1        | Arctocephalus townsendi NC008420 1   | 0,19507244 |
| Urocyon cinereogargenteus NC026723 2   | Panthera onca NC022842 1             | 0,19508414 |
| Ursus arctos isabellinus 1885 2        | Speothos venaticus C48 2             | 0,19508535 |
| Odobenus rosmarus NC004029 29          | Civettictis civetta GLC19 1          | 0,19508894 |
| Panthera tigris amoyensis NC014770 2   | Ailuropoda melanoleuca NC009492 5    | 0,19509622 |
| Ursus spelaeus EU327344 13             | Crocota crocata NC020670 3           | 0,19510041 |
| Ursus americanus JX196366 3            | Urocyon cinereogargenteus NC026723 2 | 0,19510497 |
| Vulpes zerdia KJ603240 1               | Neofelis nebulosa NC008450 3         | 0,19510534 |
| Odobenus rosmarus NC004029 29          | Acinonyx jubatus NC005212 3          | 0,19511038 |
| Urocyon cinereogargenteus NC026723 2   | Panthera pardus NC010641 5           | 0,19511615 |
| Tremarctos ornatus NC009969 2          | Cynogale bennetti KY117544 1         | 0,19512406 |
| Urocyon littoralis catalinae KP129018  | Lontra canadensis SRR10409165 1      | 0,19512632 |
| Urocyon littoralis catalinae KP129018  | Arctocephalus townsendi NC008420 1   | 0,19512731 |
| Vulpes zerdia KJ603240 1               | Arctocephalus townsendi NC008420 1   | 0,19512737 |
| Suricata suricatta SSM10 1             | Lutrogale perspicillata NC035811 1   | 0,19512856 |
| Odobenus rosmarus NC004029 29          | Civettictis civetta NC033778 1       | 0,19512929 |
| Canis latrans NC008093 7               | Bassaricyon neblina SRX1097850 1     | 0,19513041 |
| Urocyon cinereogargenteus NC026723 2   | Phocarcos hookeri NC008418 1         | 0,19513041 |
| Ursus maritimus NC003428 31            | Urva semitorquata MH464789 1         | 0,19513448 |
| Cryptoprocta ferox CFC13 1             | Ailurus fulgens NC011124 1           | 0,19513492 |
| Vulpes zerdia KJ603240 1               | Ursus arctos isabellinus 1885 2      | 0,19513623 |
| Urocyon littoralis catalinae KP129018  | Paradoxurus hermaphroditus NLNC 1    | 0,19513999 |
| Ursus arctos isabellinus 1885 2        | Nasua nasua NC020647 1               | 0,1951412  |
| Speothos venaticus C48 2               | Neophoca cinerea NC008419 1          | 0,19514257 |
| Hyena hyena NC020669 1                 | Ailuropoda melanoleuca NC009492 5    | 0,19515415 |
| Proteles cristata T393 6               | Otocyon megalotis SAF1 2             | 0,19515485 |
| Speothos venaticus C48 2               | Parahyaena brunnea NC038159 15       | 0,19515558 |
| Crocota crocata NC020670 3             | Canis lupus chanco NC010340 4        | 0,19517958 |
| Gallidia elegans D146 1                | Cuon alpinus NC013445 3              | 0,19518097 |
| Arctodus simus NC011116 1              | Tapirus terrestris T358              | 0,19519188 |
| Urocyon cinereogargenteus NC026723 2   | Urva javanica T413 1                 | 0,19519517 |
| Vulpes ferrillata NC027935 1           | Phocarcos hookeri NC008418 1         | 0,19519673 |
| Otaria byronia OTAB 1                  | Cynogale bennetti KY117544 1         | 0,19520264 |
| Speothos venaticus C48 2               | Urva brachyura KY117547 1            | 0,19520719 |
| Eupleres goudoti D128 1                | Ailuropoda melanoleuca NC009492 5    | 0,19521004 |
| Nasua nasua NC020647 1                 | Caracal caracal NC028306 1           | 0,19521366 |
| Lutrogale perspicillata NC035811 1     | Arctictis binturong T605 2           | 0,19522029 |
| Cynogale bennetti KY117544 1           | Arctocephalus forsteri NC004023 28   | 0,19522208 |
| Panthera pardus japonensis KJ866876    | Mephitis mephitis NC020648 1         | 0,19522405 |
| Odobenus rosmarus NC004029 29          | Leptailurus serval NC028316 1        | 0,19522861 |
| Neofelis nebulosa NC008450 3           | Arctocephalus australis MG023139 1   | 0,19524242 |
| Phocarcos hookeri NC008418 1           | Neofelis nebulosa NC008450 3         | 0,19524559 |
| Mellivora capensis T370 1              | Halichoerus grypus NC001602 2        | 0,19524738 |
| Ursus maritimus NC003428 31            | Urva javanica/auropunctata NC006835  | 0,19525494 |
| Ursus arctos EU497665 29               | Urva javanica/auropunctata NC006835  | 0,19525526 |
| Vulpes ferrillata NC027935 1           | Conepatus chinga NC042596 1          | 0,19525612 |
| Neovison vison NC020641 3              | Tapirus terrestris T358              | 0,1952638  |
| Panthera tigris amoyensis NC014770 2   | Cuon alpinus NC013445 3              | 0,19526431 |
| Speothos venaticus C48 2               | Helogale parvula SRR7637809 1        | 0,19527316 |
| Urocyon littoralis catalinae KP129018  | Panthera onca KP202264 2             | 0,1952756  |
| Ursus maritimus GU573488 Svalbard      | Nasua nasua NC020647 1               | 0,19527566 |
| Urocyon cinereogargenteus NC026723 2   | Panthera onca KP202264 2             | 0,19527571 |
| Ursus maritimus GU573488 Svalbard      | Speothos venaticus C48 2             | 0,19528272 |
| Ursus arctos pruinusos MG066703 3      | Panthera tigris NC010642 35          | 0,1952928  |
| Prionailurus planiceps NC028312 6      | Odobenus rosmarus NC004029 29        | 0,19529676 |
| Prionailurus planiceps KY682741 4      | Odobenus rosmarus NC004029 29        | 0,195297   |
| Cynogale bennetti KY117544 1           | Arctocephalus gazella BK010918 1     | 0,19531548 |
| Conepatus chinga NC042596 1            | Tapirus terrestris T358              | 0,19531696 |
| Vulpes zerdia KJ603240 1               | Meles leucurus NC039173 4            | 0,19532739 |
| Urocyon cinereogargenteus NC026723 2   | Arctocephalus townsendi NC008420 1   | 0,19532934 |
| Neofelis nebulosa NC008450 3           | Galictis vittata T412 1              | 0,19533259 |
| Vulpes zerdia KJ603240 1               | Paradoxurus hermaphroditus NC039591  | 0,19533744 |
| Speothos venaticus C48 2               | Arctocephalus gazella BK010918 1     | 0,1953401  |
| Ursus maritimus NC003428 31            | Nasua nasua NC020647 1               | 0,19534285 |
| Lycalopex schuhræi KT448284 1          | Galictis vittata T412 1              | 0,19534481 |
| Crocota crocata NC020670 3             | Canis latrans NC008093 7             | 0,19534974 |
| Vulpes corsac NC023958 1               | Galictis vittata T412 1              | 0,19535218 |
| Ursus maritimus NC003428 31            | Speothos venaticus C48 2             | 0,19535454 |
| Profelis aurata NC028299 1             | Odobenus rosmarus NC004029 29        | 0,19536358 |
| Neofelis nebulosa NC008450 3           | Arctocephalus townsendi NC008420 1   | 0,19537675 |
| Ursus arctos pruinusos MG066703 3      | Neofelis nebulosa NC008450 3         | 0,1953873  |
| Lutrogale perspicillata NC035811 1     | Canis anthus NC027956 2              | 0,19539528 |
| Urocyon littoralis catalinae KP129018  | Enogale naso C07YAR110 1             | 0,19539633 |
| Vulpes ferrillata NC027935 1           | Meles anakuma NC009677 1             | 0,19539849 |
| Panthera uncia KP202269 1              | Bassaricyon neblina SRX1097850 1     | 0,19541711 |
| Proteles cristata T393 6               | Nyctereutes procyonoides NC013700 3  | 0,19541572 |
| Helogale parvula SRR7637809 1          | Galictis vittata T412 1              | 0,19541924 |
| Bassaricyon neblina SRX1097850 1       | Arctictis binturong T605 2           | 0,19542785 |
| Mephitis mephitis NC020648 1           | Galidictis fasciata DM333 1          | 0,19543239 |
| Galidictis fasciata DM333 1            | Cuon alpinus NC013445 3              | 0,195452   |
| Proteles cristata T393 6               | Canis lupus familiaris NC002008 1231 | 0,19545266 |
| Mellivora capensis T370 1              | Homotherium latidens MF871702 3      | 0,19545577 |
| Mustela sibirica AP017394 11           | Tapirus terrestris T358              | 0,19545828 |

|                                        |                                        |            |
|----------------------------------------|----------------------------------------|------------|
| Ursus maritimus GU573488 Svalbard      | Mustela sibirica AP017394 11           | 0,18052925 |
| Neovison vison NC020641 3              | Canis latrans NC008093 7               | 0,18053061 |
| Nyctereutes procyonoides NC013700 3    | Mirounga angustirostris SRR10331586 1  | 0,18053159 |
| Martes martes T302 3                   | Civettictis civetta GLC19 1            | 0,18053167 |
| Ursus thibetanus formosanus NC009331 1 | Martes melampus NC009678 1             | 0,18053298 |
| Leopardus pardalis T262 1              | Canis aureus KT448274 1                | 0,18053333 |
| Catopuma badia NC028300 1              | Canis anthus NC027956 2                | 0,18053375 |
| Mustela nivalis T306 5                 | Lynx canadensis NC028313 1             | 0,18053401 |
| Melogale moschata NC020644 1           | Felis nigripes NC028309 1              | 0,18053462 |
| Lynx lynx NC027083 4                   | Arctodus simus NC011116 1              | 0,18053558 |
| Martes martes T302 3                   | Leopardus pardalis NC028315 1          | 0,18053572 |
| Martes martes T302 3                   | Felis catus NC001700 2                 | 0,18053626 |
| Leopardus tigrinus NC028317 1          | Arctodus simus NC011116 1              | 0,18053777 |
| Callorhinus ursinus NC008415 1         | Acinonyx jubatus NC005212 3            | 0,18053937 |
| Lycan pictus NC028427 2                | Felis catus NC001700 2                 | 0,18054137 |
| Ursus spelaeus EU327344 13             | Mustela sibirica NC020637 6            | 0,18054295 |
| Ursus spelaeus EU327344 13             | Martes americana NC020642 1            | 0,18054374 |
| Ursus spelaeus NC011112 8              | Mustela eversmannii NC028013 1         | 0,18054464 |
| Genetta abyssinica MG489822 1          | Ailurus fulgens styani NC009691 1      | 0,18054576 |
| Paradoxurus jerdoni MH464793 1         | Chrysoyon brachyurus NC024172 1        | 0,18054636 |
| Ursus arctos GU573486 5                | Hemigalus derbyanus MH464791 1         | 0,18054813 |
| Leopardus wiedii NC028318 1            | Canis lupus chanco NC010340 4          | 0,18055333 |
| Mustela kathiah NC023210 1             | Eumetopias jubatus NC004030 10         | 0,18055372 |
| Suricata suricatta SSM10 1             | Halichoerus grypus NC001602 2          | 0,18056229 |
| Phoca fasciata NC008428 1              | Canis lupus chanco NC010340 4          | 0,18056618 |
| Neovison vison NC020641 3              | Canis lupus chanco NC010340 4          | 0,18057377 |
| Meles meles T303 3                     | Chrotogale owstoni T607 1              | 0,18057449 |
| Martes melampus NC009678 1             | Conepatus chinga NC042596 1            | 0,18057747 |
| Mustela putorius NC020638 4            | Fossa fossana D350 1                   | 0,18057919 |
| Tremarctos ornatus NC009969 2          | Lutra lutra LC050126 1                 | 0,18057984 |
| Mustela frenata NC020640 1             | Galerella sanguinea T378 1             | 0,18058215 |
| Phocarcotus hookeri NC008418 1         | Martes martes T302 3                   | 0,18058518 |
| Conepatus chinga NC042596 1            | Ailurus fulgens NC011124 1             | 0,18058881 |
| Leopardus jacobita NC028322 1          | Enhydra lutris NC009692 1              | 0,18058926 |
| Paguma larvata PDD511 2                | Meles leucurus NC039173 4              | 0,18058951 |
| Prionailurus bengalensis NC028301 12   | Arctonyx collaris NC020645 1           | 0,18058962 |
| Leopardus wiedii NC028318 1            | Enhydra lutris NC009692 1              | 0,18058966 |
| Arctotherium sp NC030174 1             | Arctocephalus forsteri NC004023 28     | 0,18058969 |
| Salanoia concolor D378 1               | Canis adustus KT448271 1               | 0,18059063 |
| Mustela altaica NC021751 1             | Crossarchus platycephalus C7R66 1      | 0,18059129 |
| Phoca groenlandica NC008429 54         | Ursus arctos GU573486 5                | 0,18059187 |
| Mustela erminea T305 2                 | Galerella sanguinea T378 1             | 0,18059206 |
| Phocarcotus hookeri NC008418 1         | Martes martes T302 3                   | 0,18059227 |
| Puma concolor NC016470 22              | Lutra sumatrana NC035810 1             | 0,18059233 |
| Viverricula indica XK891745 1          | Mustela itatsi NC034330 19             | 0,18059249 |
| Viverra tangalunga MH464792 1          | Felis nigripes NC028309 1              | 0,18059301 |
| Mustela sibirica NC020637 6            | Felis margarita NC028308 1             | 0,18059358 |
| Smilodon populator MF871700 1          | Lutra lutra LC050126 1                 | 0,18059433 |
| Viverra zibetha T609 1                 | Canis latrans NC008093 7               | 0,18059435 |
| Ursus thibetanus mupinensis NC008753 2 | Arctocephalus gazella BK010918 1       | 0,18059444 |
| Ursus arctos GU573491 207              | Meles leucurus NC039173 4              | 0,18059523 |
| Prionailurus bengalensis KCM45 20      | Ailurus fulgens NC011124 1             | 0,18059555 |
| Mustela putorius NC020638 4            | Leopardus geoffroyi NC028320 1         | 0,18059574 |
| Melogale moschata NC020644 1           | Arctotherium sp NC030174 1             | 0,18059576 |
| Homotherium latidens MF871702 3        | Aonyx cinerea NC035814 2               | 0,18059583 |
| Puma yagouaroundi NC028311 1           | Canis latrans NC008093 7               | 0,18059586 |
| Phoca longica NC008430 1               | Galidia elegans D146 1                 | 0,18059591 |
| Ictonyx striatus T299 1                | Conepatus chinga NC042596 1            | 0,18059975 |
| Tremarctos ornatus NC009969 2          | Neovison vison NC020641 3              | 0,18060023 |
| Arctocephalus forsteri NC004023 28     | Ailurus fulgens styani NC009691 1      | 0,18060003 |
| Melogale moschata NC020644 1           | Leopardus pardalis NC028315 1          | 0,18060087 |
| Ursus arctos pruinosus MG066703 3      | Mustela erminea T305 2                 | 0,18060151 |
| Puma concolor NC016470 22              | Mustela nivalis T306 5                 | 0,18060303 |
| Ursus thibetanus thibetanus NC011118 4 | Martes melampus NC009678 1             | 0,18060312 |
| Melogale moschata KP726273 1           | Hemigalus derbyanus MH464791 1         | 0,18060352 |
| Panthera pardus japonensis KJ866876 8  | Monachus schauinslandi NC008421 1      | 0,18060364 |
| Lynx pardus NC028319 161               | Arctodus simus NC011116 1              | 0,18060368 |
| Helarctos malayanus NC009968 2         | Arctocephalus australis MG023139 1     | 0,18060479 |
| Zalophus californianus NC008416 1      | Melogale moschata V0735A 1             | 0,18060805 |
| Phoca groenlandica NC008429 54         | Panthera tigris NC010642 35            | 0,18060981 |
| Lycan pictus NC028427 2                | Felis margarita NC028308 1             | 0,18060991 |
| Ursus arctos AP012576 6                | Meles meles T303 3                     | 0,18061027 |
| Mustela sibirica AP017394 11           | Leopardus colocolo NC028314 1          | 0,18061085 |
| Viverricula indica XK891745 1          | Ursus thibetanus formosanus NC009331 1 | 0,18061174 |
| Ursus arctos AP012576 6                | Mustela erminea T305 2                 | 0,18061657 |
| Phoca vitulina NC001325 1              | Arctictis binturong T605 2             | 0,18061784 |
| Viverra zibetha T609 1                 | Canis lupus familiaris NC002008 1231   | 0,18062416 |
| Hemigalus derbyanus MH464791 1         | Arctotherium sp NC030174 1             | 0,18062514 |
| Ursus americanus JX196366 3            | Arctocephalus gazella BK010918 1       | 0,18062694 |
| Ursus americanus JX196366 3            | Nandinia binotata NC024567 1           | 0,18062884 |
| Martes flavigula NC012141 3            | Civettictis civetta GLC19 1            | 0,18063146 |
| Spilogale putorius NC010497 1          | Martes foina NC020643 1                | 0,18063477 |
| Conepatus chinga NC042596 1            | Chrotogale owstoni T607 1              | 0,18063775 |
| Panthera leo NERO 19                   | Mirounga angustirostris SRR10331586 1  | 0,18063998 |
| Mustela itatsi NC034330 19             | Genetta abyssinica MG489822 1          | 0,18064241 |
| Ommatophoca rossii AY377287etc 1       | Mungos mungo MMC7 1                    | 0,18064263 |
| Mustela itatsi NC034330 19             | Arctocephalus townsendi NC008420 1     | 0,18064559 |
| Enhydra lutris NC009692 1              | Arctocephalus pusillus NC008417 1      | 0,18064661 |
| Martes melampus NC009678 1             | Galidictis fasciata DM333 1            | 0,1806471  |
| Phocarcotus hookeri NC008418 1         | Melogale moschata V0735A 1             | 0,18064745 |
| Ommatophoca rossii AY377287etc 1       | Galictis vittata T412 1                | 0,18064781 |
| Crossarchus platycephalus C7R66 1      | Arctocephalus australis MG023139 1     | 0,18064861 |
| Lutrogale perspicillata NC035811 1     | Ailurus fulgens styani NC009691 1      | 0,18065114 |
| Prionailurus rubiginosus NC028304 2    | Lutra lutra NC01358 9                  | 0,18065509 |
| Puma yagouaroundi NC028311 1           | Meles anakuma NC009677 1               | 0,18065648 |
| Viverra zibetha T609 1                 | Meles anakuma NC009677 1               | 0,18065657 |
| Prionailurus planiceps KY682741 4      | Meles meles T303 3                     | 0,18065678 |
| Pusa sibirica NC008432 2               | Otocyon megalotis SAF1 2               | 0,18065888 |
| Mustela eversmannii NC028013 1         | Leopardus pardalis T262 1              | 0,18065985 |
| Leopardus tigrinus NC028317 1          | Callorhinus ursinus NC008415 1         | 0,18066007 |
| Crossarchus platycephalus C7R66 1      | Arctodus simus NC011116 1              | 0,18066032 |
| Prionailurus planiceps NC028312 6      | Mustela eversmannii NC028013 1         | 0,18066074 |
| Puma yagouaroundi NC028311 1           | Mustela sibirica NC020637 6            | 0,18066074 |

|                                       |                                       |            |
|---------------------------------------|---------------------------------------|------------|
| Cynogale bennetti KY117544 1          | Arctotherium sp NC030174 1            | 0,19546062 |
| Urocyon cinereoargenteus NC026723 2   | Bdeogale nigripes GLC15 1             | 0,19546406 |
| Martes foina NC020643 1               | Tapirus terrestris T358               | 0,19546995 |
| Urocyon cinereoargenteus NC026723 2   | Cryptoprocta ferox FC13 1             | 0,19547217 |
| Nasua nasua NC020647 1                | Hyaina hyaina NC020669 1              | 0,19547674 |
| Ursus arctos GU573486 5               | Nasua nasua NC020647 1                | 0,19548413 |
| Ursus thibetanus laniger MH281753 2   | Urocyon littoralis catalinae KP129018 | 0,19548839 |
| Ursus thibetanus thibetanus NC011118  | Urocyon littoralis catalinae KP129018 | 0,19548886 |
| Pardofelis marmorata NLN3 2           | Odobenus rosmarus NC004029 29         | 0,19550049 |
| Ursus arctos AP012576 6               | Speothos venaticus C48 2              | 0,1955038  |
| Vulpes zerda KJ603240 1               | Spilogale putorius NC010497 1         | 0,19550826 |
| Mustela sibirica NC020637 6           | Tapirus terrestris T358               | 0,19552593 |
| Spilogale putorius NC010497 1         | Panthera onca NC022842 1              | 0,19552834 |
| Vulpes ferrillata NC027935 1          | Arctocepalus townsendi NC008420 1     | 0,19552898 |
| Lycalopex secureae KT448284 1         | Tapirus terrestris T358               | 0,19552939 |
| Vulpes vulpes NC008434 5              | Ailurus fulgens NC011124 1            | 0,19553143 |
| Ursus thibetanus mupinensis NC008753  | Urocyon cinereoargenteus NC026723 2   | 0,1955438  |
| Crocota crocata NC020670 3            | Bassaricyon neblina SRX1097850 1      | 0,19554627 |
| Nasua nasua NC020647 1                | Catopuma temminckii NC027115 41       | 0,19555008 |
| Otocolobus parvus NC028323 1          | Nasua nasua NC020647 1                | 0,19555099 |
| Odobenus rosmarus NC004029 29         | Helogale parvula SRR7637809 1         | 0,19555242 |
| Ursus arctos GU573491 207             | Speothos venaticus C48 2              | 0,19555658 |
| Ursus americanus JX196366 3           | Neofelis nebulosa NC008450 3          | 0,19555812 |
| Odobenus rosmarus NC004029 29         | Bassaricyon neblina SRX1097850 1      | 0,19556439 |
| Melurus ursinus NC009970 2            | Crocota crocata NC020670 3            | 0,19556584 |
| Canis lupus familiaris NC002008 1231  | Bassaricyon neblina SRX1097850 1      | 0,19557306 |
| Spilogale putorius NC010497 1         | Bdeogale nigripes GLC15 1             | 0,19557534 |
| Panthera onca NC022842 1              | Odobenus rosmarus NC004029 29         | 0,19558065 |
| Pusa caspica NC008431 1               | Mellivora capensis T370 1             | 0,19559191 |
| Urocyon cinereoargenteus NC026723 2   | Ursus arctos GU573491 207             | 0,19559933 |
| Martes americana NC020642 1           | Cynogale bennetti KY117544 1          | 0,19560127 |
| Lutrogale perspicillata NC035811 1    | Chrotogale owstoni T607 1             | 0,19560295 |
| Speothos venaticus C48 2              | Callorhinus ursinus NC008415 1        | 0,19560575 |
| Urocyon cinereoargenteus NC026723 2   | Panthera uncia KP202269 1             | 0,19561219 |
| Urocyon cinereus EU497665 29          | Nasua nasua NC020647 1                | 0,19561237 |
| Vulpes zerda KJ603240 1               | Mephitis mephitis NC020648 1          | 0,19562118 |
| Ursus arctos GU573491 207             | Panthera tigris NC010642 35           | 0,19562905 |
| Phocarcotus hookeri NC008418 1        | Canis lupus familiaris NC002008 1231  | 0,19563743 |
| Speothos venaticus C48 2              | Mephitis mephitis NC020648 1          | 0,19564231 |
| Suricata suricatta SSM10 1            | Spilogale putorius NC010497 1         | 0,1956438  |
| Odobenus rosmarus NC004029 29         | Galictis vittata T412 1               | 0,19564773 |
| Lutra lutra LC050126 1                | Cynogale bennetti KY117544 1          | 0,1956524  |
| Lycalopex secureae KT448284 1         | Lutrogale perspicillata NC035811 1    | 0,19565846 |
| Spilogale putorius NC010497 1         | Galidictis fasciata DM333 1           | 0,19566031 |
| Vulpes zerda KJ603240 1               | Meles anakuma NC009677 1              | 0,19566856 |
| Urocyon littoralis catalinae KP129018 | Ichneumia albicauda T603 1            | 0,19566901 |
| Ursus arctos isabellinus 1885 2       | Nyctereutes procyonoides NC013700 3   | 0,19567817 |
| Diplogale hosei MH464790 1            | Bassaricyon neblina SRX1097850 1      | 0,19568186 |
| Phocarcotus hookeri NC008418 1        | Canis lupus chanco NC010340 4         | 0,19569287 |
| Otocyon megalotis SAF1 2              | Mephitis mephitis NC020648 1          | 0,19569513 |
| Odobenus rosmarus NC004029 29         | Felis margarita NC028308 1            | 0,19570173 |
| Panthera pardus japonensis KJ866876   | Odobenus rosmarus NC004029 29         | 0,19570427 |
| Ursus arctos AP012576 6               | Panthera tigris NC010642 35           | 0,19570898 |
| Panthera tigris NC010642 35           | Melurus ursinus NC009970 2            | 0,19571075 |
| Spilogale putorius NC010497 1         | Pardofelis marmorata NLN3 2           | 0,19571854 |
| Ursus arctos pruinosus MG066703 3     | Ursus javanicus/auropunctata NC006835 | 0,19573323 |
| Lutrogale perspicillata NC035811 1    | Ursus arctos GU573486 5               | 0,19573429 |
| Viverra tangalunga MH464792 1         | Urocyon cinereoargenteus NC026723 2   | 0,195738   |
| Phocarcotus hookeri NC008418 1        | Canis mesomelas KT448280 1            | 0,19573919 |
| Prionodon lingsang ERR2391707 1       | Arctocepalus pusillus NC008417 1      | 0,19573928 |
| Vulpes zerda KJ603240 1               | Ursus arctos EU497665 29              | 0,19574259 |
| Urocyon cinereoargenteus NC026723 2   | Poecilogale albicauda T602 1          | 0,19574596 |
| Mungotictis decemlineata NC027828     | Ailuropoda melanoleuca NC009492 5     | 0,19575837 |
| Ursus arctos pruinosus MG066703 3     | Speothos venaticus C48 2              | 0,19575839 |
| Otocyon megalotis SAF1 2              | Crocota crocata NC020670 3            | 0,19576047 |
| Urocyon littoralis catalinae KP129018 | Panthera pardus NC010641 5            | 0,1957895  |
| Mellivora capensis T370 1             | Ailurus fulgens styani NC009691 1     | 0,19579566 |
| Urocyon littoralis catalinae KP129018 | Ursus arctos GU573486 5               | 0,19580112 |
| Vulpes ferrillata NC027935 1          | Ailurus fulgens styani NC009691 1     | 0,19580141 |
| Urocyon cinereoargenteus NC026723 2   | Bassaricyon neblina SRX1097850 1      | 0,19580202 |
| Panthera pardus NC010641 5            | Mephitis mephitis NC020648 1          | 0,19580291 |
| Urocyon littoralis catalinae KP129018 | Prionodon lingsang ERR2391707 1       | 0,19580358 |
| Speothos venaticus C48 2              | Arctocepalus forsteri KT693377 17     | 0,19581014 |
| Ursus arctos pruinosus MG066703 3     | Ursus semitorquatus MH464789 1        | 0,19581428 |
| Urocyon cinereoargenteus NC026723 2   | Ailuropoda melanoleuca NC009492 5     | 0,19582337 |
| Panthera uncia NC010638 1             | Galictis vittata T412 1               | 0,19583765 |
| Speothos venaticus C48 2              | Panthera leo spelaea KX258452 2       | 0,19583942 |
| Cuon alpinus NC013445 3               | Aonyx cinerea NC035814 2              | 0,1958445  |
| Neofelis nebulosa NC008450 3          | Conepatus chinga NC042596 1           | 0,19584519 |
| Panthera tigris amoyensis NC014770 2  | Melurus ursinus NC009970 2            | 0,19584559 |
| Enhydra lutris NC009692 1             | Tapirus terrestris T358               | 0,1958492  |
| Parahyaena brunnea NC038159 15        | Canis mesomelas KT448280 1            | 0,19586053 |
| Urocyon littoralis catalinae KP129018 | Bdeogale nigripes GLC15 1             | 0,19586797 |
| Vulpes corsac NC023958 1              | Ailurus fulgens NC011124 1            | 0,19586836 |
| Monachus schauinslandi NC008421 1     | Mellivora capensis T370 1             | 0,19587912 |
| Urocyon cinereoargenteus NC026723 2   | Panthera pardus japonensis KJ866876   | 0,19588168 |
| Vulpes vulpes NC008434 5              | Proteles cristata T393 6              | 0,19588581 |
| Crocota crocata NC020670 3            | Canis anthus NC027956 2               | 0,19588807 |
| Ursus arctos AP012576 6               | Nasua nasua NC020647 1                | 0,19589342 |
| Crocota crocata NC020670 3            | Canis lupus familiaris NC002008 1231  | 0,19592503 |
| Cryptoprocta ferox FC13 1             | Canis mesomelas KT448280 1            | 0,19592734 |
| Mustela eversmannii NC028013 1        | Tapirus terrestris T358               | 0,19592984 |
| Urocyon littoralis catalinae KP129018 | Helogale parvula SRR7637809 1         | 0,19593483 |
| Nasua nasua NC020647 1                | Helogale parvula SRR7637809 1         | 0,19593498 |
| Urocyon littoralis catalinae KP129018 | Ursus arctos GU573486 5               | 0,19593595 |
| Panthera uncia NC010638 1             | Conepatus chinga NC042596 1           | 0,19593786 |
| Urocyon cinereoargenteus NC026723 2   | Ichneumia albicauda T603 1            | 0,19593839 |
| Speothos venaticus C48 2              | Arctocepalus townsendi NC008420 1     | 0,19594376 |
| Vulpes corsac NC023958 1              | Cryptoprocta ferox FC13 1             | 0,19594401 |
| Vulpes ferrillata NC027935 1          | Cryptoprocta ferox FC13 1             | 0,19594447 |
| Vulpes zerda KJ603240 1               | Ursus maritimus GU573488 Svalbard     | 0,19594617 |
| Crocota crocata NC020670 3            | Tapirus terrestris T358               | 0,19594617 |
| Pardofelis marmorata NLN3 2           | Nasua nasua NC020647 1                | 0,1959523  |

|                                        |                                       |            |
|----------------------------------------|---------------------------------------|------------|
| Prionailurus bengalensis NC028301 12   | Mustela eversmannii NC028013 1        | 0,18066086 |
| Puma concolor NC016470 22              | Potos flavus T414 1                   | 0,18066165 |
| Melogale moschata V0735A 1             | Leopardus pardalis T262 1             | 0,18066181 |
| Viverricula indica NC025296 2          | Mustela sibirica NC020637 6           | 0,18066207 |
| Viverra tanguilunga MH464792 1         | Leopardus geoffroyi NC028320 1        | 0,18066323 |
| Martes zibellina NC011579 39           | Leopardus pardalis T262 1             | 0,18066354 |
| Ursus maritimus NC003428 31            | Mustela sibirica AP017394 11          | 0,1806639  |
| Prionailurus planiceps KY682741 4      | Canis aureus KT448274 1               | 0,18066555 |
| Ursus thibetanus mupinensis NC008753 2 | Meles anakuma NC009677 1              | 0,18066612 |
| Ursus arctos isabellinus 18B5 2        | Mustela kathiah NC023210 1            | 0,18066615 |
| Pusa sibirica NC008432 2               | Proteles cristata T393 6              | 0,18066674 |
| Nyctereutes procyonoides NC013700 3    | Catopuma badia NC028300 1             | 0,18066686 |
| Mustela altaica NC021751 1             | Leptailurus serval NC028316 1         | 0,18066816 |
| Melogale moschata NC020644 1           | Lynx rufus NC014456 3                 | 0,18066822 |
| Martes martes T302 3                   | Leopardus jacobita NC028322 1         | 0,18066894 |
| Phoca groenlandica NC008429 54         | Canis aureus KT448274 1               | 0,18067038 |
| Potos flavus T414 1                    | Arctictis binturong T605 2            | 0,18067098 |
| Neovison vison NC020641 3              | Leopardus tigrinus NC028317 1         | 0,18067135 |
| Ursus arctos AP012576 6                | Melogale moschata KP726273 1          | 0,18067135 |
| Prionailurus bengalensis CKM45 20      | Mustela altaica NC021751 1            | 0,18067214 |
| Mustela sibirica NC020637 6            | Mephitis mephitis NC020648 1          | 0,18067263 |
| Prionailurus planiceps KY682741 4      | Lycalopex sechurae KT448284 1         | 0,18067344 |
| Puma concolor NC016470 22              | Martes foina NC020643 1               | 0,18067527 |
| Puma yagouaroundi NC028311 1           | Martes foina NC020643 1               | 0,18067566 |
| Mustela altaica NC021751 1             | Mephitis mephitis NC020648 1          | 0,18067721 |
| Prionailurus rubiginosus NC028304 2    | Canis mesomelas KT448280 1            | 0,18067929 |
| Gulo gulo NC009685 3                   | Arctocepalus pusillus NC008417 1      | 0,18067966 |
| Panthera tigris amoyensis NC014770 2   | Mirounga angustirostris SRR10331586 1 | 0,18067983 |
| Hemigalus derbyanus MH464791 1         | Canis anthus NC027956 2               | 0,18068001 |
| Mustela kathiah NC023210 1             | Canis lupus chanco NC010340 4         | 0,18068321 |
| Ursus thibetanus formosanus NC009331 1 | Martes foina NC020643 1               | 0,18068473 |
| Martes foina NC020643 1                | Helarctos malayanus NC009968 2        | 0,18068534 |
| Ursus thibetanus thibetanus NC011118 4 | Leopardus pardalis T262 1             | 0,18068622 |
| Ursus thibetanus thibetanus NC011118 4 | Martes foina NC020643 1               | 0,18068789 |
| Melogale moschata V0735A 1             | Eumetopias jubatus NC004030 10        | 0,18068966 |
| Nandinia binotata NC024567 1           | Canis mesomelas KT448280 1            | 0,18069015 |
| Zalophus californianus NC008416 1      | Martes foina NC020643 1               | 0,18069063 |
| Mustela sibirica NC020637 6            | Canis lupus chanco NC010340 4         | 0,18069336 |
| Lutra lutra LC050126 1                 | Hemigalus derbyanus MH464791 1        | 0,18069535 |
| Melogale moschata NC020644 1           | Eumetopias jubatus NC004030 10        | 0,18069538 |
| Puma yagouaroundi NC028311 1           | Canis lupus familiaris NC002008 1231  | 0,18069662 |
| Canis adustus KT448271 1               | Ailurus fulgens NC011124 1            | 0,18069962 |
| Ichneumia albicauda T603 1             | Canis adustus KT448271 1              | 0,180702   |
| Ommatophoca rossii AY377287etc 1       | Mephitis mephitis NC020648 1          | 0,18070577 |
| Melogale moschata NC020644 1           | Conepatus chinga NC042596 1           | 0,18070915 |
| Meles meles T302 3                     | Arctocepalus townsendii NC008420 1    | 0,18070923 |
| Mustela itatsi NC034330 19             | Canis adustus KT448271 1              | 0,1807097  |
| Nasua nasua NC020647 1                 | Mustela nigripes NC024942 1           | 0,1807106  |
| Neophoca cinerea NC008419 1            | Arctomys collaris NC020645 1          | 0,18071482 |
| Tremarctos ornatus NC009969 2          | Martes americana NC020642 1           | 0,18071617 |
| Procyon lotor AB462046 3               | Canis adustus KT448271 1              | 0,18071641 |
| Mustela frenata NC020640 1             | Attilax paludinosus T606 1            | 0,18071721 |
| Otaria byronia OTAB 1                  | Melogale moschata KP726273 1          | 0,18071926 |
| Ommatophoca rossii AY377287etc 1       | Canis lupus familiaris NC002008 1231  | 0,18071982 |
| Martes pennanti NC020664 16            | Arctocepalus forsteri KT693377 17     | 0,18072072 |
| Otaria byronia OTAB 1                  | Meles anakuma NC009677 1              | 0,18072164 |
| Neophoca cinerea NC008419 1            | Martes pennanti NC020664 16           | 0,18072174 |
| Halichoerus grypus NC001602 2          | Crocota crocata NC020670 3            | 0,18072231 |
| Leopardus pardalis NC028315 1          | Arctomys collaris NC020645 1          | 0,18072292 |
| Prionailurus viverrinus NC028305 1     | Ailurus fulgens styani NC009691 1     | 0,18072404 |
| Otaria byronia OTAB 1                  | Martes pennanti NC020664 16           | 0,1807256  |
| Suricata suricatta SSM10 1             | Phoca fasciata NC008428 1             | 0,18072639 |
| Mustela putorius NC020638 4            | Lynx pardinus NC028319 161            | 0,18072671 |
| Mustela kathiah NC023210 1             | Felis margarita NC028308 1            | 0,1807273  |
| Mungos mungo/gambianus SRR770482 1     | Canis aureus KT448274 1               | 0,18072736 |
| Lutra sumatrana NC035810 1             | Felis silvestris lybica KP202275 4    | 0,18072775 |
| Ursus maritimus NC003428 31            | Nandinia binotata NC024567 1          | 0,18072802 |
| Viverra tanguilunga MH464792 1         | Caracal caracal NC028306 1            | 0,18072832 |
| Viverra tanguilunga MH464792 1         | Arctotherium sp NC030174 1            | 0,18072863 |
| Mustela nigripes NC024942 1            | Leptailurus serval NC028316 1         | 0,18072897 |
| Viverricula indica XK891751 1          | Nyctereutes procyonoides NC013700 3   | 0,18073025 |
| Mustela erminea T305 2                 | Ichneumia albicauda T603 1            | 0,18073076 |
| Mustela itatsi NC034330 19             | Leopardus geoffroyi NC028320 1        | 0,18073085 |
| Prionailurus bengalensis CKM45 20      | Lutra sumatrana NC035810 1            | 0,18073155 |
| Pusa sibirica NC008432 2               | Chrysocyon brachyurus NC024172 1      | 0,18073243 |
| Puma concolor NC016470 22              | Nyctereutes procyonoides NC013700 3   | 0,18073259 |
| Leptailurus serval NC028316 1          | Canis anthus NC027956 2               | 0,18073276 |
| Prionailurus bengalensis NC028301 12   | Nyctereutes procyonoides NC013700 3   | 0,18073294 |
| Ursus thibetanus mupinensis NC008753 2 | Melogale moschata NC020644 1          | 0,18073517 |
| Mustela altaica NC021751 1             | Lynx lynx NC027083 4                  | 0,18073595 |
| Mustela altaica NC021751 1             | Lynx pardinus NC028319 161            | 0,18073601 |
| Mustela altaica NC021751 1             | Felis margarita NC028308 1            | 0,18073621 |
| Ursus thibetanus mupinensis NC008753 2 | Ailurus fulgens styani NC009691 1     | 0,18073621 |
| Ursus arctos GU573486 5                | Mustela sibirica AP017394 11          | 0,18073736 |
| Mustela nivalis T306 5                 | Leopardus jacobita NC028322 1         | 0,18073766 |
| Procyon lotor AB462046 3               | Prionailurus bengalensis CKM45 20     | 0,18073954 |
| Leopardus guigna NC028321 1            | Bassariscus sumichrasti SRX1099089 1  | 0,18074001 |
| Nandinia binotata NC024567 1           | Melurus ursinus NC009970 2            | 0,18074017 |
| Smilodon populator MF871700 1          | Lutra sumatrana NC035810 1            | 0,18074016 |
| Ursus spelaeus EU327344 13             | Martes zibellina NC011579 39          | 0,18074034 |
| Prionailurus viverrinus NC028305 1     | Bassariscus sumichrasti SRX1099089 1  | 0,18074046 |
| Ursus spelaeus NC011112 8              | Melogale moschata KP726273 1          | 0,18074051 |
| Arctictis binturong T605 2             | Ailurus fulgens styani NC009691 1     | 0,18074377 |
| Ursus thibetanus laniger MH281753 2    | Fossa fossana D350 1                  | 0,18074414 |
| Mustela sibirica NC020637 6            | Leopardus colocolo NC028314 1         | 0,18074544 |
| Helarctos malayanus NC009968 2         | Ailurus fulgens NC011124 1            | 0,18074645 |
| Ursus thibetanus laniger MH281753 2    | Mustela nivalis T306 5                | 0,18075086 |
| Prionailurus rubiginosus NC028304 2    | Chrysocyon brachyurus NC024172 1      | 0,18075472 |
| Enhydra lutris NC009692 1              | Civettictis civetta NC033378 1        | 0,18075635 |
| Ursus americanus JX196366 3            | Callorhinus ursinus NC008415 1        | 0,18075766 |
| Diplogale hosi MH464790 1              | Arctomys collaris NC020645 1          | 0,18075974 |
| Paradoxurus hermaphroditus NLNC 1      | Canis lupus chanco NC010340 4         | 0,18076174 |
| Martes melampus NC009678 1             | Civettictis civetta NC033378 1        | 0,18076184 |

|                                        |                                       |            |
|----------------------------------------|---------------------------------------|------------|
| Ursus arctos pruinosus MG066703 3      | Uruva brachyura KY117547 1            | 0,19595265 |
| Crocota crocata NC020670 3             | Ailurus fulgens NC011124 1            | 0,19596002 |
| Ursus arctos GU573486 5                | Speothos venaticus C48 2              | 0,19596714 |
| Panthera onca KP202264 2               | Odobenus rosmarus NC004029 29         | 0,19597435 |
| Canis aureus KT448274 1                | Tapirus terrestris T358               | 0,19597541 |
| Canis anthus NC027956 2                | Tapirus terrestris T358               | 0,19599886 |
| Otocyon megalotis SAF1 2               | Conepatus chinga NC042596 1           | 0,19600415 |
| Phocarcotus hookeri NC008418 1         | Canis anthus NC027956 2               | 0,19600506 |
| Neofelis nebulosa NC008450 3           | Chrysocyon brachyurus NC024172 1      | 0,19600518 |
| Ursus arctos AP012576 6                | Neofelis nebulosa NC008450 3          | 0,19600634 |
| Paradoxurus hermaphroditus NLNC 1      | Lutrogale perspicillata NC035811 1    | 0,19601215 |
| Panthera tigris NC010642 35            | Conepatus chinga NC042596 1           | 0,19601376 |
| Ursus thibetanus mupinensis NC008753 2 | Urocyon littoralis catalinae KP129018 | 0,19601518 |
| Urocyon littoralis catalinae KP129018  | Panthera uncia KP202269 1             | 0,19601612 |
| Vulpes lagopus NC026529 3              | Proteles cristata T393 6              | 0,19602077 |
| Melurus ursinus NC009970 2             | Uruva brachyura KY117547 1            | 0,19602674 |
| Odobenus rosmarus NC004029 29          | Caracal caracal NC028306 1            | 0,19603758 |
| Neofelis nebulosa NC008450 3           | Lontra canadensis SRR10409165 1       | 0,1960507  |
| Procyon lotor AB462046 3               | Tapirus terrestris T358               | 0,19606584 |
| Vulpes zerda KJ603240 1                | Lutrogale perspicillata NC035811 1    | 0,19606914 |
| Mustela altaica NC021751 1             | Tapirus terrestris T358               | 0,19607247 |
| Martes zibellina NC011579 39           | Cynogale bennetti KY117544 1          | 0,19607273 |
| Vulpes ferrillata NC027935 1           | Poecilogale albinocha T602 1          | 0,19607803 |
| Ursus corsac NC023958 1                | Proteles cristata T393 6              | 0,19608815 |
| Proteles cristata T393 6               | Canis anthus NC027956 2               | 0,19608973 |
| Vulpes lagopus NC026529 3              | Galictis vittata T412 1               | 0,19609261 |
| Ursus maritimus NC003428 31            | Crocota crocata NC020670 3            | 0,19609641 |
| Ursus maritimus GU573488 Svalbard      | Crocota crocata NC020670 3            | 0,19609644 |
| Neofelis nebulosa NC008450 3           | Arctotherium sp NC030174 1            | 0,1961233  |
| Neophoca cinerea NC008419 1            | Cuon alpinus NC013445 3               | 0,196126   |
| Ursus arctos GU573491 207              | Neofelis nebulosa NC008450 3          | 0,19612801 |
| Spilogale putorius NC010497 1          | Panthera tigris amoyensis NC014770 2  | 0,19613038 |
| Nasua nasua NC020647 1                 | Chrotogale owstoni T607 1             | 0,19613396 |
| Urocyon cinereoargenteus NC026723 2    | Suricata suricatta SSM10 1            | 0,19613715 |
| Proteles cristata T393 6               | Poecilogale albinocha T602 1          | 0,19617429 |
| Neofelis nebulosa NC008450 3           | Cynogale bennetti KY117544 1          | 0,19617887 |
| Panthera leo NERO 19                   | Mephitis mephitis NC020648 1          | 0,19619755 |
| Urocyon littoralis catalinae KP129018  | Suricata suricatta SSM10 1            | 0,19620445 |
| Vulpes ferrillata NC027935 1           | Procyon lotor AB462049 4              | 0,19620857 |
| Urocyon cinereoargenteus NC026723 2    | Procyon lotor AB462049 4              | 0,19621091 |
| Urocyon littoralis catalinae KP129018  | Cryptoprocta ferox CFC13 1            | 0,19621284 |
| Vulpes zerda KJ603240 1                | Ursus maritimus NC003428 31           | 0,19621386 |
| Chrysocyon brachyurus NC024172 1       | Tapirus terrestris T358               | 0,1962211  |
| Suricata suricatta SSM10 1             | Mephitis mephitis NC020648 1          | 0,19622627 |
| Spilogale putorius NC010497 1          | Eupleres goudotii I28 1               | 0,19623081 |
| Cryptoprocta ferox CFC13 1             | Ailuropoda melanoleuca NC009492 5     | 0,19623414 |
| Canis lupus chanco NC010340 4          | Tapirus terrestris T358               | 0,19623442 |
| Panthera onca NC022842 1               | Bassaricyon neblina SRX1097850 1      | 0,19623488 |
| Odobenus rosmarus NC004029 29          | Felis catus NC001700 2                | 0,19624132 |
| Spilogale putorius NC010497 1          | Panthera tigris NC010642 35           | 0,19626506 |
| Spilogale putorius NC010497 1          | Panthera leo spelaea KX258452 2       | 0,19627117 |
| Ursus arctos pruinosus MG066703 3      | Cynogale bennetti KY117544 1          | 0,19627377 |
| Canis anthus NC027956 2                | Bassaricyon neblina SRX1097850 1      | 0,19627501 |
| Ursus arctos GU573491 207              | Nyctereutes procyonoides NC013700 3   | 0,19628398 |
| Vulpes zerda KJ603240 1                | Ursus arctos GU573486 5               | 0,1962872  |
| Phocarcotus hookeri NC008418 1         | Chrysocyon brachyurus NC024172 1      | 0,19629142 |
| Speothos venaticus C48 2               | Otaria byronia OTAB 1                 | 0,1962938  |
| Ursus thibetanus formosanus NC009331 1 | Urocyon cinereoargenteus NC026723 2   | 0,19629404 |
| Odobenus rosmarus NC004029 29          | Galidictis fasciata MB333 1           | 0,19630148 |
| Cuon alpinus NC013445 3                | Arctocepalus townsendii NC008420 1    | 0,19631958 |
| Urocyon littoralis catalinae KP129018  | Spilogale putorius NC010497 1         | 0,19632052 |
| Urocyon cinereoargenteus NC026723 2    | Spilogale putorius NC010497 1         | 0,1963207  |
| Speothos venaticus C48 2               | Arctocepalus australis MG023139 1     | 0,19634886 |
| Ursus thibetanus thibetanus NC011118   | Tapirus terrestris T358               | 0,19635724 |
| Ursus arctos GU573486 5                | Nyctereutes procyonoides NC013700 3   | 0,1963574  |
| Vulpes lagopus NC026529 3              | Crocota crocata NC020670 3            | 0,19635801 |
| Odobenus rosmarus NC004029 29          | Mungos mungo/gambianus SRR77048       | 0,19636075 |
| Urocyon littoralis catalinae KP129018  | Panthera tigris NC010642 35           | 0,19636075 |
| Proteles cristata T393 6               | Lycan pictus NC028422 2               | 0,19636697 |
| Mellivora capensis T370 1              | Ailurus fulgens NC011124 1            | 0,19640163 |
| Speothos venaticus C48 2               | Neofelis nebulosa NC008450 3          | 0,19640177 |
| Urocyon cinereoargenteus NC026723 2    | Helogale parvula SRR7637809 1         | 0,19640619 |
| Vulpes ferrillata NC027935 1           | Cynogale bennetti KY117544 1          | 0,19640768 |
| Mirounga angustirostris SRR10331586    | Mellivora capensis T370 1             | 0,19641212 |
| Nasua nasua NC020647 1                 | Civettictis civetta GLC19 1           | 0,19641922 |
| Urocyon cinereoargenteus NC026723 2    | Panthera tigris NC010642 35           | 0,19642805 |
| Proteles cristata T393 6               | Tapirus terrestris T358               | 0,19643165 |
| Ursus arctos GU573486 5                | Crocota crocata NC020670 3            | 0,19643918 |
| Monachus monachus NC044972 5           | Mellivora capensis T370 1             | 0,1964428  |
| Neofelis nebulosa NC008450 3           | Arctocepalus gazella BK010918 1       | 0,19645669 |
| Neophoca cinerea NC008419 1            | Neofelis nebulosa NC008450 3          | 0,19645865 |
| Neophoca cinerea NC008419 1            | Cynogale bennetti KY117544 1          | 0,19647065 |
| Nyctereutes procyonoides NC013700 3    | Bassaricyon neblina SRX1097850 1      | 0,1964757  |
| Urocyon littoralis catalinae KP129018  | Procyon lotor AB462049 4              | 0,1964801  |
| Urocyon cinereoargenteus NC026723 2    | Chrotogale owstoni T607 1             | 0,19648141 |
| Panthera tigris NC010642 35            | Bassaricyon neblina SRX1097850 1      | 0,19650078 |
| Panthera tigris amoyensis NC014770 2   | Mephitis mephitis NC020648 1          | 0,19651535 |
| Mephitis mephitis NC020648 1           | Crocota crocata NC020670 3            | 0,19652016 |
| Panthera leo spelaea KX258452 2        | Mephitis mephitis NC020648 1          | 0,19652078 |
| Spilogale putorius NC010497 1          | Panthera pardus japonensis KJ866876   | 0,19652544 |
| Canis latrans NC008093 7               | Tapirus terrestris T358               | 0,19653367 |
| Vulpes corsac NC023958 1               | Cynogale bennetti KY117544 1          | 0,19654125 |
| Panthera pardus NC010641 5             | Odobenus rosmarus NC004029 29         | 0,19655074 |
| Urocyon littoralis catalinae KP129018  | Poecilogale albinocha T602 1          | 0,19655389 |
| Ursus arctos GU573491 207              | Nasua nasua NC020647 1                | 0,19655502 |
| Ursus arctos pruinosus MG066703 3      | Nasua nasua NC020647 1                | 0,19655523 |
| Urocyon cinereoargenteus NC026723 2    | Parahyaena brunnea NC038159 15        | 0,19655629 |
| Melurus ursinus NC009970 2             | Cynogale bennetti KY117544 1          | 0,19656056 |
| Urocyon cinereoargenteus NC026723 2    | Ictonyx striatus T299 1               | 0,1965639  |
| Urocyon littoralis catalinae KP129018  | Ailuropoda melanoleuca NC009492 5     | 0,19656409 |
| Viverricula indica XK891745 1          | Odobenus rosmarus NC004029 29         | 0,19656438 |
| Vulpes ferrillata NC027935 1           | Galictis vittata T412 1               | 0,19656549 |
| Bassaricyon neblina SRX1097850 1       | Ailuropoda melanoleuca NC009492 5     | 0,19656914 |

|                                        |                                        |            |
|----------------------------------------|----------------------------------------|------------|
| Phocarcctos hookeri NC008418 1         | Martes flavigula NC012141 3            | 0,18076529 |
| Martes flavigula NC012141 3            | Leopardus wiedii NC028318 1            | 0,18077214 |
| Phoca largha NC008430 1                | Neofelis nebulosa NC008450 3           | 0,18077573 |
| Lutra lutra NC011358 9                 | Arctocepalus forsteri KT693377 17      | 0,18077663 |
| Martes melampus NC009678 1             | Arctocepalus australis MG023139 1      | 0,18077812 |
| Phocarcctos hookeri NC008418 1         | Lutra sumatrana NC035810 1             | 0,18077935 |
| Ursus thibetanus laniger MH281753 2    | Homotherium latidens MF871702 3        | 0,18078041 |
| Mungos mungo MMC7 3                    | Callorhinus ursinus NC008415 1         | 0,18078139 |
| Vulpes vulpes NC008434 5               | Pusa caspica NC008431 1                | 0,18078329 |
| Prionailurus planiceps KY682741 4      | Lutra lutra LC050126 1                 | 0,18079026 |
| Mustela kathiah NC023210 1             | Mustela kathiah NC023210 1             | 0,18079048 |
| Viverra zibetha T609 1                 | Martes americana NC020642 1            | 0,18079142 |
| Paradoxurus hermaphroditus NLNC 1      | Meles meles T303 3                     | 0,18079273 |
| Meles meles T303 3                     | Canis adustus KT448271 1               | 0,18079303 |
| Civettictis civetta NC033378 1         | Canis lupus familiaris NC002008 1231   | 0,18079366 |
| Meles leucurus NC039173 4              | Genetta genetta T297 1                 | 0,18079408 |
| Martes melampus NC009678 1             | Felis catus NC001700 2                 | 0,18079434 |
| Prionailurus viverrinus NC028305 1     | Mustela kathiah NC023210 1             | 0,18079461 |
| Mustela itatsi NC024330 19             | Leopardus jacobita NC028322 1          | 0,18079501 |
| Mustela putorius NC020638 4            | Leopardus jacobita NC028322 1          | 0,18079503 |
| Viverra tangalunga MH464792 1          | Canis aureus KT448274 1                | 0,18079512 |
| Mustela kathiah NC023210 1             | Leptailurus serval NC028316 1          | 0,18079534 |
| Prionailurus bengalensis NC028301 12   | Mustela itatsi NC034330 19             | 0,18079564 |
| Otocolobus manul NC028323 1            | Mustela eversmannii NC028013 1         | 0,18079621 |
| Puma concolor NC016470 22              | Martes americana NC020642 1            | 0,18079707 |
| Mustela sibirica NC020637 6            | Catopuma temminckii NC027115 41        | 0,18079737 |
| Monachus schauinslandi NC008421 1      | Canis anthus NC027956 2                | 0,18079825 |
| Otaria byronia OTAB 1                  | Ailurus fulgens styani NC009691 1      | 0,18079855 |
| Vulpes ferrilata NC027935 1            | Hydurga leptonyx NC008425 1            | 0,18079981 |
| Ursus spelaeus NC011112 8              | Eumetopias jubatus NC004030 10         | 0,18080123 |
| Ursus thibetanus mupinensis NC008753 2 | Ailurus fulgens NC011124 1             | 0,18080334 |
| Martes martes T302 3                   | Leopardus wiedii NC028318 1            | 0,18080388 |
| Martes melampus NC009678 1             | Arctocepalus forsteri NC004023 28      | 0,18080433 |
| Mirounga leonina NC008422 1            | Crocota crocata NC020670 3             | 0,18080468 |
| Leopardus pardalis NC028315 1          | Aonyx cinerea NC035814 2               | 0,18080471 |
| Ursus spelaeus NC011112 8              | Martes melampus NC009678 1             | 0,18080568 |
| Felis margarita NC028308 1             | Arctodus pictus NC011116 1             | 0,18080634 |
| Phoca vitulina NC001325 1              | Lyaon pictus NC028427 2                | 0,18080765 |
| Ursus spelaeus EU327344 13             | Enhydra lutris NC009692 1              | 0,18080805 |
| Lutra lutra LC050126 1                 | Canis adustus KT448271 1               | 0,18080869 |
| Mustela frenata NC020640 1             | Ailuropoda melanoleuca NC009492 5      | 0,18080878 |
| Ursus thibetanus mupinensis NC008753 2 | Leopardus pardalis T262 1              | 0,1808092  |
| Viverricula indica KX891751 1          | Lyaon pictus NC028427 2                | 0,18081126 |
| Zalophus californianus NC008416 1      | Mustela eversmannii NC028013 1         | 0,18081184 |
| Mustela eversmannii NC028013 1         | Leopardus colocolo NC028314 1          | 0,18081285 |
| Gulo gulo NC009685 3                   | Arctocepalus australis MG023139 1      | 0,1808136  |
| Helarctos malayanus NC009968 2         | Ailurus fulgens styani NC009691 1      | 0,180814   |
| Monachus schauinslandi NC008421 1      | Chrysocyon brachyurus NC024172 1       | 0,1808144  |
| Parahyaena brunnea NC038159 15         | Monachus schauinslandi NC008421 1      | 0,1808154  |
| Ursus thibetanus laniger MH281753 2    | Arctocepalus pusillus NC008417 1       | 0,18081588 |
| Zalophus wolbebecki SRR4431565 1       | Ursus thibetanus formosanus NC009331 1 | 0,18081678 |
| Viverricula indica NC025296 2          | Chrysocyon brachyurus NC024172 1       | 0,18081801 |
| Viverricula indica KX891751 1          | Helarctos malayanus NC009968 2         | 0,18081814 |
| Mustela altaica NC021751 1             | Leopardus colocolo NC028314 1          | 0,18082114 |
| Ommatophoca rossii AY377287etc 1       | Ursa javanica/auropunctata NC006835 1  | 0,18082437 |
| Paradoxurus hermaphroditus NLNC 1      | Canis lupus familiaris NC002008 1231   | 0,18082689 |
| Mustela altaica NC021751 1             | Eumetopias jubatus NC004030 10         | 0,18083443 |
| Spilogale putorius NC010497 1          | Paradoxurus hermaphroditus NC039591 1  | 0,18083842 |
| Canis lupus chanco NC010340 4          | Arctictis binturong T605 2             | 0,18084508 |
| Canis lupus familiaris NC002008 1231   | Acinonyx jubatus NC005212 3            | 0,18084592 |
| Arctocepalus australis MG023139 1      | Ailurus fulgens NC011124 1             | 0,18084772 |
| Meles meles T303 3                     | Ursa semitorquata MH464789 1           | 0,18084756 |
| Tremarctos ornatus NC009969 2          | Enhydra lutris NC009692 1              | 0,18084794 |
| Ursus arctos pruinosus MG066703 3      | Homotherium latidens MF871702 3        | 0,18084982 |
| Potos flavus T414 1                    | Arctocepalus australis MG023139 1      | 0,18085162 |
| Potos flavus T414 1                    | Arctocepalus gazella BK010918 1        | 0,180852   |
| Eupleres goudoti D128 1                | Canis adustus KT448271 1               | 0,18085337 |
| Martes pennanti NC020664 16            | Fossa fossana D350 1                   | 0,18085423 |
| Viverra tangalunga MH464792 1          | Arctocepalus pusillus NC008417 1       | 0,18085444 |
| Leptailurus serval NC028316 1          | Enhydra lutris NC009692 1              | 0,18085715 |
| Meles leucurus NC039173 4              | Leopardus pardalis T262 1              | 0,18085717 |
| Martes martes T302 3                   | Galidictis fasciata DM333 1            | 0,1808579  |
| Ursus thibetanus thibetanus NC011118 4 | Gulo gulo NC009685 3                   | 0,18085805 |
| Viverricula indica KX891751 1          | Meles anakuma NC009677 1               | 0,18085817 |
| Lynx rufus NC014456 3                  | Lutra lutra LC050126 1                 | 0,18085822 |
| Meles meles T303 3                     | Leopardus jacobita NC028322 1          | 0,18085833 |
| Meles meles T303 3                     | Felis catus NC001700 2                 | 0,18085842 |
| Pusa sibirica NC008432 2               | Paradoxurus hermaphroditus NLNC 1      | 0,18085971 |
| Procyon lotor AB462046 3               | Arctocepalus pusillus NC008417 1       | 0,18086042 |
| Zalophus wolbebecki SRR4431565 1       | Meles anakuma NC009677 1               | 0,18086091 |
| Procyon lotor AB462046 3               | Ailurus fulgens NC011124 1             | 0,18086107 |
| Prionodon linsang ERR2391707 1         | Lobodon carcinophaga NC008423 1        | 0,18086126 |
| Mustela kathiah NC023210 1             | Felis catus NC001700 2                 | 0,18086162 |
| Prionailurus planiceps KY682741 4      | Mustela sibirica AP017394 11           | 0,1808624  |
| Mustela sibirica AP017394 11           | Felis margarita NC028308 1             | 0,18086287 |
| Vulpes vulpes NC008434 5               | Lynx rufus NC014456 3                  | 0,18086368 |
| Potos flavus T414 1                    | Catopuma badia NC028300 1              | 0,18086423 |
| Pusa sibirica NC008432 2               | Diplogale hosei MH464790 1             | 0,18086471 |
| Pusa hispida NC 008433 1               | Nasua nasua NC020647 1                 | 0,18086512 |
| Paradoxurus hermaphroditus NLNC 1      | Ailurus fulgens styani NC009691 1      | 0,18086545 |
| Ommatophoca rossii AY377287etc 1       | Lutrogale perspicillata NC035811 1     | 0,18086645 |
| Pusa caspica NC008431 1                | Chrysocyon brachyurus NC024172 1       | 0,18086746 |
| Mustela altaica NC021751 1             | Civettictis civetta GLC19 1            | 0,18086831 |
| Monachus schauinslandi NC008421 1      | Galidia elegans D146 1                 | 0,1808694  |
| Martes pennanti NC020664 16            | Lynx canadensis NC028313 1             | 0,1808697  |
| Mustela nivalis T306 5                 | Caracal caracal NC028306 1             | 0,18087329 |
| Nandinia binotata NC024567 1           | Galictis vittata T412 1                | 0,18087403 |
| Potos flavus T414 1                    | Melurus ursinus NC009970 2             | 0,18087424 |
| Martes martes T302 3                   | Felis chaus NC028307 1                 | 0,18087429 |
| Caracal caracal NC028306 1             | Canis aureus KT448274 1                | 0,18087447 |
| Zalophus californianus NC008416 1      | Meles anakuma NC009677 1               | 0,180876   |
| Viverricula indica NC025296 2          | Ursus thibetanus mupinensis NC008753 2 | 0,18087608 |
| Ursus thibetanus mupinensis NC008753 2 | Martes foina NC020643 1                | 0,18087672 |

|                                       |                                       |            |
|---------------------------------------|---------------------------------------|------------|
| Panthera uncia KP202269 1             | Mephitis mephitis NC020648 1          | 0,19657069 |
| Nasua nasua NC020647 1                | Ursa semitorquata MH464789 1          | 0,19660759 |
| Phocarcctos hookeri NC008418 1        | Lycalopex sechurae KT448284 1         | 0,19660988 |
| Urocyon cinereoargenteus NC026723 2   | Procyon lotor AB462046 3              | 0,1966154  |
| Ursus maritimus GU573488 Svalbard     | Nyctereutes procyonoides NC013700 3   | 0,19662052 |
| Ursus maritimus NC003428 31           | Nyctereutes procyonoides NC013700 3   | 0,19662054 |
| Urocyon littoralis catalinae KP129018 | Panthera pardus japonensis KJ866876   | 0,1966223  |
| Canis lupus chanco NC010340 4         | Bassaricyon neblina SRX1097850 1      | 0,1966546  |
| Panthera leo NERO 19                  | Nasua nasua NC020647 1                | 0,19665949 |
| Vulpes lagopus NC026529 3             | Ailurus fulgens styani NC009691 1     | 0,19667605 |
| Vulpes zerda KJ603240 1               | Ursus arctos GU573491 207             | 0,19668506 |
| Urocyon littoralis catalinae KP129018 | Genetta genetta T297 1                | 0,1966892  |
| Proteles cristata T393 6              | Phocarcctos hookeri NC008418 1        | 0,19669443 |
| Nasua nasua NC020647 1                | Ailuropoda melanoleuca NC009492 5     | 0,19670241 |
| Martes flavigula NC012141 3           | Tapirus terrestris T358               | 0,19670674 |
| Lutra sumatrana NC035810 1            | Tapirus terrestris T358               | 0,19673057 |
| Urocyon cinereoargenteus NC026723 2   | Ailurus fulgens styani NC009691 1     | 0,19674727 |
| Vulpes zerda KJ603240 1               | Ursus arctos pruinosus MG066703 3     | 0,19675243 |
| Paradoxurus jerdoni MH464793 1        | Lutrogale perspicillata NC035811 1    | 0,19675274 |
| Vulpes zerda KJ603240 1               | Ursus arctos AP012576 6               | 0,19676422 |
| Ursus thibetanus formosanus NC0093    | Urocyon littoralis catalinae KP129018 | 0,19676547 |
| Speothos venaticus C48 2              | Panthera uncia NC010638 1             | 0,19676779 |
| Lutra lutra LC050126 1                | Tapirus terrestris T358               | 0,19679192 |
| Viverra tangalunga MH464792 1         | Urocyon littoralis catalinae KP129018 | 0,1968153  |
| Urocyon littoralis catalinae KP129018 | Chrotogale owstoni T607 1             | 0,19681802 |
| Vulpes vulpes NC008434 5              | Crocota crocata NC020670 3            | 0,19682959 |
| Odobenus rosmarus NC004029 29         | Ursa semitorquata MH464789 1          | 0,19683129 |
| Vulpes vulpes NC008434 5              | Galictis vittata T412 1               | 0,19683363 |
| Urocyon cinereoargenteus NC026723 2   | Diplogale hosei MH464790 1            | 0,19683436 |
| Panthera tigris amoyensis NC014770 2  | Bassaricyon neblina SRX1097850 1      | 0,19683778 |
| Nasua nasua NC020647 1                | Canis lupus chanco NC010340 4         | 0,19685505 |
| Spilogale putorius NC010497 1         | Mungotictis decemlineata NC027828 1   | 0,19687098 |
| Urocyon cinereoargenteus NC026723 2   | Cynictis penicillata T375 1           | 0,19687849 |
| Urocyon littoralis catalinae KP129018 | Procyon lotor AB462046 3              | 0,1968846  |
| Panthera uncia KP202269 1             | Nasua nasua NC020647 1                | 0,19689435 |
| Paradoxurus jerdoni MH464793 1        | Odobenus rosmarus NC004029 29         | 0,19689758 |
| Proteles cristata T393 6              | Chrysocyon brachyurus NC024172 1      | 0,19692457 |
| Spilogale putorius NC010497 1         | Panthera uncia NC010638 1             | 0,19692986 |
| Phocarcctos hookeri NC008418 1        | Cynogale bennetti KY117544 1          | 0,19694047 |
| Prionodon linsang ERR2391707 1        | Lutrogale perspicillata NC035811 1    | 0,19694546 |
| Poecilogale albinucha T602 1          | Tapirus terrestris T358               | 0,19694765 |
| Lyaon pictus NC028427 2               | Tapirus terrestris T358               | 0,19695424 |
| Ursus thibetanus laniger MH281753 2   | Tapirus terrestris T358               | 0,1969641  |
| Lutrogale perspicillata NC035811 1    | Canis mesomelas KT448280 1            | 0,1969644  |
| Urocyon littoralis catalinae KP129018 | Ictonyx striatus T299 1               | 0,196968   |
| Spilogale putorius NC010497 1         | Panthera pardus NC010641 5            | 0,19696951 |
| Mephitis mephitis NC020648 1          | Galidia elegans D146 1                | 0,19698055 |
| Nasua nasua NC020647 1                | Canis aureus KT448274 1               | 0,19699159 |
| Spilogale putorius NC010497 1         | Hyaena hyaena NC020669 1              | 0,19699523 |
| Cuon alpinus NC013445 3               | Cryptoprocta ferox FC13 1             | 0,19700569 |
| Prionodon linsang ERR2391707 1        | Arctocepalus gazella BK010918 1       | 0,19700854 |
| Neofelis nebulosa NC008450 3          | Ailuropoda melanoleuca NC009492 5     | 0,19701181 |
| Vulpes ferrilata NC027935 1           | Ailurus fulgens NC011124 1            | 0,19701315 |
| Nasua nasua NC020647 1                | Galidictis fasciata DM333 1           | 0,19701558 |
| Urocyon cinereoargenteus NC026723 2   | Genetta genetta T297 1                | 0,19702588 |
| Proteles cristata T393 6              | Ailurus fulgens styani NC009691 1     | 0,19703369 |
| Salanoia concolor D378 1              | Odobenus rosmarus NC004029 29         | 0,19704197 |
| Canis mesomelas KT448280 1            | Tapirus terrestris T358               | 0,19708727 |
| Urocyon littoralis catalinae KP129018 | Parahyaena brunnea NC038159 15        | 0,19709481 |
| Panthera pardus japonensis KJ866876   | Nasua nasua NC020647 1                | 0,19709706 |
| Ursus spelaeus NC011112 8             | Urocyon cinereoargenteus NC026723 2   | 0,19710484 |
| Ursus arctos AP012576 6               | Nyctereutes procyonoides NC013700 3   | 0,19710489 |
| Ursus spelaeus NC011112 8             | Urocyon littoralis catalinae KP129018 | 0,19710495 |
| Gulo gulo NC009685 3                  | Tapirus terrestris T358               | 0,19710852 |
| Nasua nasua NC020647 1                | Canis lupus familiaris NC002008 1231  | 0,19712012 |
| Cynogale bennetti KY117544 1          | Arctocepalus townsendi NC008420 1     | 0,1971321  |
| Lutra sumatrana NC035810 1            | Cynogale bennetti KY117544 1          | 0,19713295 |
| Vulpes vulpes NC008434 5              | Bassaricyon neblina SRX1097850 1      | 0,19714858 |
| Urocyon littoralis catalinae KP129018 | Diplogale hosei MH464790 1            | 0,19715098 |
| Vulpes zerda KJ603240 1               | Poecilogale albinucha T602 1          | 0,19715714 |
| Ursus arctos EU497665 29              | Crocota crocata NC020670 3            | 0,19717385 |
| Odobenus rosmarus NC004029 29         | Felis nigripes NC028309 1             | 0,19718367 |
| Panthera tigris NC010642 35           | Mephitis mephitis NC020648 1          | 0,19718887 |
| Spilogale putorius NC010497 1         | Odobenus rosmarus NC004029 29         | 0,19720221 |
| Ursus americanus JX196366 3           | Crocota crocata NC020670 3            | 0,19720772 |
| Ursus arctos EU497665 29              | Nyctereutes procyonoides NC013700 3   | 0,19722661 |
| Viverricula indica KX891745 1         | Nasua nasua NC020647 1                | 0,197227   |
| Speothos venaticus C48 2              | Aonyx cinerea NC035814 2              | 0,19722724 |
| Nasua nasua NC020647 1                | Genetta genetta T297 1                | 0,19722949 |
| Paradoxurus hermaphroditus NLNC 1     | Bassaricyon neblina SRX1097850 1      | 0,19723059 |
| Urocyon littoralis catalinae KP129018 | Panthera tigris amoyensis NC014770 2  | 0,19723618 |
| Ursus spelaeus EU327344 13            | Urocyon cinereoargenteus NC026723 2   | 0,19723988 |
| Urocyon littoralis catalinae KP129018 | Aonyx cinerea NC035814 2              | 0,197282   |
| Urocyon cinereoargenteus NC026723 2   | Aonyx cinerea NC035814 2              | 0,19728205 |
| Nasua nasua NC020647 1                | Bdeogale nigripes GLC15 1             | 0,19728254 |
| Mustela nivalis T306 5                | Tapirus terrestris T358               | 0,1972882  |
| Paguma larvata PDD511 2               | Nasua nasua NC020647 1                | 0,1972954  |
| Urocyon cinereoargenteus NC026723 2   | Panthera tigris amoyensis NC014770 2  | 0,19730346 |
| Odobenus rosmarus NC004029 29         | Nasua nasua NC020647 1                | 0,19731186 |
| Odobenus rosmarus NC004029 29         | Catopuma temminckii NC027115 41       | 0,19731393 |
| Odobenus rosmarus NC004029 29         | Ictonyx striatus T299 1               | 0,19731967 |
| Spilogale putorius NC010497 1         | Parahyaena brunnea NC038159 15        | 0,19733937 |
| Vulpes lagopus NC026529 3             | Ailurus fulgens NC011124 1            | 0,19734918 |
| Urocyon littoralis catalinae KP129018 | Ailurus fulgens styani NC009691 1     | 0,19735326 |
| Melliivora capensis T370 1            | Leopardus pardalis NC028315 1         | 0,19736178 |
| Ursus thibetanus formosanus NC0093    | Tapirus terrestris T358               | 0,19736752 |
| Vulpes zerda KJ603240 1               | Galictis vittata T412 1               | 0,19737191 |
| Ursus spelaeus EU327344 13            | Urocyon littoralis catalinae KP129018 | 0,19737464 |
| Panthera onca NC022842 1              | Nasua nasua NC020647 1                | 0,19737774 |
| Panthera leo spelaeae KX258452 2      | Nasua nasua NC020647 1                | 0,19738369 |
| Prionodon linsang ERR2391707 1        | Arctocepalus forsteri KT693377 17     | 0,19741161 |
| Vulpes corsac NC023958 1              | Lutrogale perspicillata NC035811 1    | 0,19741505 |
| Speothos venaticus C48 2              | Arctocepalus forsteri NC004023 28     | 0,19742042 |

|                                        |                                        |            |
|----------------------------------------|----------------------------------------|------------|
| Neophoca cinerea NC008419 1            | Melursus ursinus NC009970 2            | 0,18087766 |
| Lycalopex sechurae KT448284 1          | Catopuma badia NC028300 1              | 0,18087971 |
| Ursus spelaeus NC011112 8              | Martes americana NC020642 1            | 0,18088001 |
| Spilogale putorius NC008497 1          | Enhydra lutris NC009692 1              | 0,18088068 |
| Ursus thibetanus thibetanus NC011118 4 | Arctocepalus pusillus NC008417 1       | 0,18088083 |
| Ursus thibetanus formosanus NC009331 1 | Martes martes T302 3                   | 0,18088163 |
| Lycyon pictus NC028427 2               | Leptailurus serval NC028316 1          | 0,18088204 |
| Phocarcos hookeri NC008418 1           | Gulo gulo NC009685 3                   | 0,18088204 |
| Phoca groenlandica NC008429 54         | Panthera onca NC022842 1               | 0,18088213 |
| Phoca fasciata NC008428 1              | Panthera leo spelaea KX258452 2        | 0,1808846  |
| Vulpes lagopus NC026529 3              | Monachus monachus NC044972 5           | 0,18088955 |
| Martes flavigula NC012141 3            | Canis latrans NC008093 7               | 0,18089005 |
| Zalophus californicus NC008416 1       | Mustela altaica NC021751 1             | 0,18089154 |
| Genetta servalina NC024568 2           | Canis lupus familiaris NC002008 1231   | 0,18089376 |
| Mungos mungo/gambianus SRR7704821 1    | Eumetopias jubatus NC004030 10         | 0,180894   |
| Paguma larvata PDD511 2                | Canis lupus chanco NC010340 4          | 0,18089415 |
| Panthera pardus japonensis KJ866876 8  | Monachus monachus NC044972 5           | 0,18089569 |
| Helarctos malayanus NC009968 2         | Arctocepalus forsteri NC004023 28      | 0,18089776 |
| Vulpes lagopus NC026529 3              | Homotherium latidens MF871702 3        | 0,18090314 |
| Phoca vitulina NC001325 1              | Canis lupus chanco NC010340 4          | 0,18090597 |
| Martes flavigula NC012141 3            | Arctotherium sp NC030174 1             | 0,18090756 |
| Otocolobus manul NC028323 1            | Canis lupus chanco NC010340 4          | 0,18091133 |
| Ursus arctos GU573491 207              | Ommatophoca rossii AY377287etc 1       | 0,18091135 |
| Enhydra lutris NC009692 1              | Arctocepalus gazella BK010918 1        | 0,18091348 |
| Ommatophoca rossii AY377287etc 1       | Arctictis binturong T605 2             | 0,18091431 |
| Mustela eversmannii NC028013 1         | Crossarchus platycephalus C7R66 1      | 0,18091509 |
| Melogale moschata KP726273 1           | Fossa fossana D350 1                   | 0,18091519 |
| Tremarctos ornatus NC009969 2          | Melogale moschata V0735A 1             | 0,1809164  |
| Monachus schauinslandi NC008421 1      | Cynogale bennetti KY117544 1           | 0,18091692 |
| Halichoerus grypus NC001602 2          | Chrysocyon brachyurus NC024172 1       | 0,18091771 |
| Viverricula indica KX891751 1          | Enhydra lutris NC009692 1              | 0,18091783 |
| Melogale moschata NC020644 1           | Callorhinus ursinus NC008415 1         | 0,18091957 |
| Mustela sibirica NC020637 6            | Arctocepalus pusillus NC008417 1       | 0,18092082 |
| Martes americana NC020642 1            | Conepatus chinga NC042596 1            | 0,18092114 |
| Fossa fossana D350 1                   | Aonyx cinerea NC035814 2               | 0,18092136 |
| Paradoxurus hermaphroditus NC039591 1  | Mustela frenata NC020640 1             | 0,18092138 |
| Martes pennanti NC020664 16            | Arctocepalus pusillus NC008417 1       | 0,18092477 |
| Meles meles T303 3                     | Leopardus pardalis T262 1              | 0,18092504 |
| Paradoxurus hermaphroditus NLNC 1      | Meles anakuma NC009677 1               | 0,18092546 |
| Meles anakuma NC009677 1               | Lynx pardinus NC028319 161             | 0,18092546 |
| Panthera pardus japonensis KJ866876 8  | Mirounga leonina NC008422 1            | 0,18092659 |
| Leptailurus serval NC028316 1          | Callorhinus ursinus NC008415 1         | 0,18092729 |
| Leopardus guigna NC028321 1            | Enhydra lutris NC009692 1              | 0,18092752 |
| Mustela putorius NC020638 4            | Lynx canadensis NC028313 1             | 0,1809282  |
| Pusa caspica NC008431 1                | Otocyon megalotis SAF1 2               | 0,1809282  |
| Prionodon pardicolor NC024569 2        | Cystophora cristata NC008427 1         | 0,18092829 |
| Mustela itatsi NC034330 19             | Lynx canadensis NC028313 1             | 0,18092839 |
| Mustela putorius NC020638 4            | Canis aureus KT448274 1                | 0,18092841 |
| Otocolobus manul NC028323 1            | Martes melampus NC009678 1             | 0,18092875 |
| Martes melampus NC009678 1             | Felis nigripes NC028309 1              | 0,18092877 |
| Mustela eversmannii NC028013 1         | Lynx pardinus NC028319 161             | 0,18092881 |
| Viverra tangalunga MH464792 1          | Prionailurus planiceps NC028312 6      | 0,18092927 |
| Mustela sibirica AP017394 11           | Leopardus jacobita NC028322 1          | 0,18092953 |
| Puma concolor NC016470 22              | Mustela sibirica NC020637 6            | 0,18092966 |
| Mustela nigripes NC024942 1            | Genetta servalina NC024568 2           | 0,18092974 |
| Prionodon pardicolor NC024569 2        | Meles leucurus NC039173 4              | 0,18092987 |
| Ursus arctos GU573491 207              | Nandinia binotata NC024567 1           | 0,18092996 |
| Melogale moschata KP726273 1           | Lynx rufus NC014456 3                  | 0,18092997 |
| Prionailurus bengalensis CKM45 20      | Meles leucurus NC039173 4              | 0,18093015 |
| Melogale moschata V0735A 1             | Lynx rufus NC014456 3                  | 0,1809302  |
| Vulpes vulpes NC008434 5               | Prionailurus rubiginosus NC028304 2    | 0,18093175 |
| Mustela sibirica AP017394 11           | Catopuma temminckii NC027115 41        | 0,18093212 |
| Martes americana NC020642 1            | Leopardus pardalis T262 1              | 0,18093246 |
| Mustela kathiah NC023210 1             | Catopuma badia NC028300 1              | 0,18093279 |
| Taxidea taxus NC020646 1               | Ichneumia albicauda T603 1             | 0,18093315 |
| Otocolobus manul NC028323 1            | Canis latrans NC008093 7               | 0,18093329 |
| Phoca groenlandica NC008429 54         | Otocyon megalotis SAF1 2               | 0,18093552 |
| Homotherium latidens MF871702 3        | Eumetopias jubatus NC004030 10         | 0,18093589 |
| Mustela altaica NC021751 1             | Lynx canadensis NC028313 1             | 0,18093795 |
| Viverricula indica NC025296 2          | Poecilogale albinucha T602 1           | 0,18093975 |
| Ursus arctos GU573486 5                | Mustela kathiah NC023210 1             | 0,18094179 |
| Mustela nivalis T306 5                 | Catopuma temminckii NC027115 41        | 0,18094194 |
| Lutra lutra LC050128 1                 | Leopardus colocolo NC028314 1          | 0,18094346 |
| Martes foina NC020643 1                | Catopuma badia NC028300 1              | 0,18094438 |
| Mustela sibirica NC020637 6            | Acinonyx jubatus NC005212 3            | 0,18094534 |
| Mustela sibirica AP017394 11           | Acinonyx jubatus NC005212 3            | 0,18094535 |
| Monachus schauinslandi NC008421 1      | Hyaena hyaena NC020669 1               | 0,18094592 |
| Ursus thibetanus thibetanus NC008753 2 | Leopardus geoffroyi NC028320 1         | 0,18094794 |
| Ursus thibetanus mupinensis NC011118 4 | Ailurus fulgens NC011124 1             | 0,18094817 |
| Viverricula indica KX891751 1          | Ursus thibetanus formosanus NC009331 1 | 0,18094826 |
| Gulo gulo NC009685 3                   | Arctocepalus gazella BK010918 1        | 0,18094912 |
| Viverricula indica NC025296 2          | Ursus thibetanus thibetanus NC011118 4 | 0,18095371 |
| Poecilogale albinucha T602 1           | Hemigalus derbyanus MH464791 1         | 0,18095542 |
| Vulpes corsac NC023958 1               | Homotherium latidens MF871702 3        | 0,18095583 |
| Hemigalus derbyanus MH464791 1         | Gulo gulo NC009685 3                   | 0,18095863 |
| Paguma larvata PDD511 2                | Canis lupus familiaris NC002008 1231   | 0,18096107 |
| Spilogale putorius NC010497 1          | Nandinia binotata NC024567 1           | 0,18096355 |
| Vulpes vulpes NC008434 5               | Halichoerus grypus NC001602 2          | 0,18097354 |
| Canis lupus familiaris NC002008 1231   | Arctictis binturong T605 2             | 0,18097472 |
| Mustela sibirica AP017394 11           | Genetta abyssinica MG489822 1          | 0,18098181 |
| Mustela sibirica NC020637 6            | Fossa fossana D350 1                   | 0,18098319 |
| Meles meles T303 3                     | Gaillardictis fasciata DM333 1         | 0,18098696 |
| Martes martes T302 3                   | Crossarchus platycephalus C7R66 1      | 0,18098703 |
| Pusa sibirica NC008432 2               | Nyctereutes procyonoides NC013700 3    | 0,18098705 |
| Mustela erminea T305 2                 | Uva javanica T413 1                    | 0,18098733 |
| Vulpes zerdia KJ603240 1               | Cystophora cristata NC008427 1         | 0,18098775 |
| Mustela sibirica AP017394 11           | Arctocepalus pusillus NC008417 1       | 0,18098815 |
| Nasua nasua NC020647 1                 | Mustela altaica NC021751 1             | 0,18098924 |
| Viverra zibetha T609 1                 | Martes melampus NC009678 1             | 0,18098964 |
| Ursus arctos EU497665 29               | Homotherium latidens MF871702 3        | 0,18099    |
| Phocarcos hookeri NC008418 1           | Melogale moschata NC020644 1           | 0,18099107 |
| Arctocepalus gazella BK010918 1        | Aonyx cinerea NC035814 2               | 0,18099165 |
| Zalophus wollebaeki SRR4431565 1       | Enhydra lutris NC009692 1              | 0,18099168 |

|                                        |                                       |            |
|----------------------------------------|---------------------------------------|------------|
| Paguma larvata PDD511 2                | Lutrogale perspicillata NC035811 1    | 0,19742627 |
| Prionodon linsang ERR2391707 1         | Otaria byronia OTAB 1                 | 0,19743058 |
| Nyctereutes procyonoides NC013700 3    | Tapirus terrestris T358               | 0,19747739 |
| Prionodon linsang ERR2391707 1         | Arctocepalus townsendi NC008420 1     | 0,19747782 |
| Paradoxurus jerdoni MH464793 1         | Bassaricyon neblina SRX1097850 1      | 0,19749899 |
| Proteles cristata T393 6               | Ailuropoda melanoleuca NC009492 5     | 0,19752578 |
| Nasua nasua NC020647 1                 | Civettictis civetta NC033378 1        | 0,19753945 |
| Nasua nasua NC020647 1                 | Mellivora capensis T370 1             | 0,1975408  |
| Suricata suricatta SSM10 1             | Nasua nasua NC020647 1                | 0,19755161 |
| Urocyon littoralis catalinae KP129018  | Cynictis penicillata T375 1           | 0,19755174 |
| Viverricula indica NC025296 2          | Nasua nasua NC020647 1                | 0,19756758 |
| Ursus arctos isabellinus 1885 2        | Crocota crocata NC020670 3            | 0,1975781  |
| Urocyon littoralis catalinae KP129018  | Panthera leo spelaea KX258452 2       | 0,19758533 |
| Urocyon cinereogargenteus NC026723 2   | Panthera leo NERO 19                  | 0,19759719 |
| Martes martes T302 3                   | Tapirus terrestris T358               | 0,19761613 |
| Nasua nasua NC020647 1                 | Atilax paludinosus T606 1             | 0,19761781 |
| Nasua nasua NC020647 1                 | Xenogale naso C07XAR110 1             | 0,19761825 |
| Vulpes zerdia KJ603240 1               | Ailurus fulgens styani NC009691 1     | 0,19761865 |
| Prionodon linsang ERR2391707 1         | Phocarcos hookeri NC008418 1          | 0,19762066 |
| Nasua nasua NC020647 1                 | Galerella sanguinea T378 1            | 0,19762841 |
| Lycyon pictus NC028427 2               | Lutrogale perspicillata NC035811 1    | 0,19762881 |
| Lycalopex sechurae KT448284 1          | Bassaricyon neblina SRX1097850 1      | 0,19764441 |
| Urocyon cinereogargenteus NC026723 2   | Panthera leo spelaea KX258452 2       | 0,19765265 |
| Odobenus rosmarus NC004029 29          | Felis chaus NC028307 1                | 0,19765489 |
| Ursus arctos AP012576 6                | Crocota crocata NC020670 3            | 0,19766328 |
| Urocyon littoralis catalinae KP129018  | Panthera leo NERO 19                  | 0,19766447 |
| Urocyon cinereogargenteus NC026723 2   | Neofelis nebulosa NC008450 3          | 0,19766781 |
| Speothos venaticus C48 2               | Phocarcos hookeri NC008418 1          | 0,19770011 |
| Mephitis mephitis NC020648 1           | Tapirus terrestris T358               | 0,19770236 |
| Urocyon cinereogargenteus NC026723 2   | Proteles cristata T393 6              | 0,19770473 |
| Paguma larvata PDD511 2                | Odobenus rosmarus NC004029 29         | 0,19770876 |
| Martes americana NC020642 1            | Tapirus terrestris T358               | 0,19774491 |
| Vulpes lagopus NC026529 3              | Cynogale bennetti KY117544 1          | 0,1977544  |
| Paguma larvata PDD511 2                | Bassaricyon neblina SRX1097850 1      | 0,19776793 |
| Viverricula indica NC025296 2          | Odobenus rosmarus NC004029 29         | 0,19777974 |
| Odobenus rosmarus NC004029 29          | Mephitis mephitis NC020648 1          | 0,19779351 |
| Panthera leo spelaea KX258452 2        | Odobenus rosmarus NC004029 29         | 0,19780469 |
| Spilogale putorius NC010497 1          | Helogale parvula SRR7637809 1         | 0,19780715 |
| Urocyon cinereogargenteus NC026723 2   | Ailurus fulgens NC011124 1            | 0,19782442 |
| Ursus thibetanus mupinensis NC008753 2 | Tapirus terrestris T358               | 0,19782937 |
| Panthera uncia NC010638 1              | Nasua nasua NC020647 1                | 0,19783707 |
| Proteles cristata T393 6               | Ailurus fulgens NC011124 1            | 0,19784166 |
| Viverricula indica KX891751 1          | Odobenus rosmarus NC004029 29         | 0,19784309 |
| Crocota crocata NC020670 3             | Chrysocyon brachyurus NC024172 1      | 0,197862   |
| Lutra lutra NC011358 9                 | Tapirus terrestris T358               | 0,19786929 |
| Phocarcos hookeri NC008418 1           | Cuon alpinus NC013445 3               | 0,19787526 |
| Martes zibellina NC011579 39           | Tapirus terrestris T358               | 0,1978803  |
| Nyctereutes procyonoides NC013700 3    | Nasua nasua NC020647 1                | 0,19788978 |
| Nasua nasua NC020647 1                 | Canis anthus NC027956 2               | 0,19789037 |
| Urocyon cinereogargenteus NC026723 2   | Bassaricyon neblina SRX1097850 1      | 0,19789158 |
| Neofelis nebulosa NC008450 3           | Mephitis mephitis NC020648 1          | 0,19789222 |
| Odobenus rosmarus NC004029 29          | Diplogale hosei MH464790 1            | 0,19790055 |
| Nandinia binotata NC024567 1           | Mellivora capensis T370 1             | 0,19794817 |
| Mustela itatsi NC034330 19             | Tapirus terrestris T358               | 0,19795604 |
| Urocyon littoralis catalinae KP129018  | Bassaricyon neblina SRX1097850 1      | 0,1979589  |
| Lycalopex sechurae KT448284 1          | Crocota crocata NC020670 3            | 0,19796056 |
| Vulpes zerdia KJ603240 1               | Crocota crocata NC020670 3            | 0,19797234 |
| Paradoxurus hermaphroditus NLNC 1      | Odobenus rosmarus NC004029 29         | 0,19797505 |
| Ursus arctos GU573491 207              | Crocota crocata NC020670 3            | 0,19798194 |
| Crocota crocata NC020670 3             | Ailuropoda melanoleuca NC009492 5     | 0,19799617 |
| Lutra lutra NC011358 9                 | Cynogale bennetti KY117544 1          | 0,19800888 |
| Otocyon megalotis SAF1 2               | Cynogale bennetti KY117544 1          | 0,19801983 |
| Nasua nasua NC020647 1                 | Uva brachyura KY117547 1              | 0,19802386 |
| Panthera leo NERO 19                   | Odobenus rosmarus NC004029 29         | 0,19802992 |
| Ursus arctos pruinosus MG066703 3      | Nyctereutes procyonoides NC013700 3   | 0,1980346  |
| Gaillardictis vittata T412 1           | Cynogale bennetti KY117544 1          | 0,19804613 |
| Panthera tigris NC010642 35            | Nasua nasua NC020647 1                | 0,19804825 |
| Vulpes zerdia KJ603240 1               | Odobenus rosmarus NC004029 29         | 0,19811897 |
| Vulpes ferrillata NC027935 1           | Lutrogale perspicillata NC035811 1    | 0,19815591 |
| Nasua nasua NC020647 1                 | Canis latrans NC008093 7              | 0,1981594  |
| Mellivora capensis T370 1              | Leopardus pardalis T262 1             | 0,1981701  |
| Odobenus rosmarus NC004029 29          | Uva javanica T413 1                   | 0,19817747 |
| Panthera uncia NC010638 1              | Mephitis mephitis NC020648 1          | 0,1981872  |
| Lontra canadensis SRR10409165 1        | Diplogale hosei MH464790 1            | 0,19822483 |
| Ursus arctos isabellinus 1885 2        | Urocyon cinereogargenteus NC026723 2  | 0,1982366  |
| Ursus arctos isabellinus 1885 2        | Urocyon littoralis catalinae KP129018 | 0,19823664 |
| Lycyon pictus NC028427 2               | Bassaricyon neblina SRX1097850 1      | 0,19823782 |
| Prionodon pardicolor NC024569 2        | Nasua nasua NC020647 1                | 0,19823827 |
| Prionodon pardicolor NC024569 2        | Bassaricyon neblina SRX1097850 1      | 0,19823828 |
| Vulpes ferrillata NC027935 1           | Proteles cristata T393 6              | 0,19824331 |
| Vulpes ferrillata NC027935 1           | Crocota crocata NC020670 3            | 0,19824402 |
| Odobenus rosmarus NC004029 29          | Atilax paludinosus T606 1             | 0,19824687 |
| Panthera uncia KP202269 1              | Odobenus rosmarus NC004029 29         | 0,1982635  |
| Urocyon littoralis catalinae KP129018  | Neofelis nebulosa NC008450 3          | 0,19827378 |
| Martes melampus NC009678 1             | Tapirus terrestris T358               | 0,19827679 |
| Mellivora capensis T370 1              | Lynx pardinus NC028319 161            | 0,19830418 |
| Panthera uncia NC010638 1              | Bassaricyon neblina SRX1097850 1      | 0,19831043 |
| Lutrogale perspicillata NC035811 1     | Chrysocyon brachyurus NC024172 1      | 0,19831662 |
| Tremarctos ornatus NC009969 2          | Tapirus terrestris T358               | 0,19835408 |
| Paradoxurus hermaphroditus NC039591 1  | Lontra canadensis SRR10409165 1       | 0,19836564 |
| Proteles cristata T393 6               | Lycalopex sechurae KT448284 1         | 0,19837402 |
| Diplogale hosei MH464790 1             | Aonyx cinerea NC035814 2              | 0,19837487 |
| Speothos venaticus C48 2               | Cryptoprocta ferox CFC13 1            | 0,1983784  |
| Odobenus rosmarus NC004029 29          | Eupleres goudotii D128 1              | 0,19838332 |
| Canis mesomelas KT448280 1             | Bassaricyon neblina SRX1097850 1      | 0,1983985  |
| Panthera tigris amoyensis NC014770 2   | Odobenus rosmarus NC004029 29         | 0,19840829 |
| Prionodon linsang ERR2391707 1         | Arctocepalus forsteri NC004023 28     | 0,19841263 |
| Prionodon linsang ERR2391707 1         | Arctocepalus australis MG6282139 1    | 0,19842151 |
| Vulpes zerdia KJ603240 1               | Ailurus fulgens NC011124 1            | 0,19842638 |
| Vulpes ferrillata NC027935 1           | Crocota crocata NC020670 3            | 0,19844607 |
| Crocota crocata NC020670 3             | Odobenus rosmarus NC004029 29         | 0,19845158 |
| Procyon lotor AB462049 4               | Conepatus chinga NC042596 1           | 0,19849028 |
|                                        | Tapirus terrestris T358               | 0,19849047 |



|                                        |                                       |            |
|----------------------------------------|---------------------------------------|------------|
| Lutra sumatrana NC035810 1             | Genetta servalina NC024568 2          | 0,18099199 |
| Lutra lutra LC050126 1                 | Leopardus jacobita NC028322 1         | 0,18099329 |
| Otocyon megalotis SAF1 2               | Nandinia binotata NC024567 1          | 0,18099335 |
| Lynx canadensis NC028313 1             | Lutra lutra NC011358 9                | 0,18099336 |
| Meles meles T303 3                     | Leptailurus serval NC028316 1         | 0,18099442 |
| Vulpes lagopus NC026529 3              | Phoca fasciata NC008428 1             | 0,18099503 |
| Martes melampus NC009678 1             | Catopuma temminckii NC027115 41       | 0,18099526 |
| Taxidea taxus NC020646 1               | Prionodon pardicolor NC024569 2       | 0,18099556 |
| Prionailurus planiceps KY682741 4      | Martes melampus NC009678 1            | 0,18099572 |
| Phoca groenlandica NC008429 54         | Heligale parvula SRR7637809 1         | 0,18099599 |
| Mustela sibirica AP017394 11           | Lynx rufus NC014456 3                 | 0,18099602 |
| Zalophus wolfebaeki SRR4431565 1       | Tremarctos ornatus NC009969 2         | 0,18099681 |
| Puma concolor NC016470 22              | Mustela sibirica AP017394 11          | 0,18099697 |
| Pardofelis marmorata NLN3 2            | Mustela nigripes NC024942 1           | 0,18099701 |
| Mustela sibirica AP017394 11           | Felis silvestris lybica KP202275 4    | 0,18099718 |
| Suricata suricatta SSM10 1             | Canis adustus KT448271 1              | 0,18099731 |
| Pusa hispida NC 008433 1               | Canis anthus NC027956 2               | 0,18099745 |
| Vulpes corsac NC023958 1               | Pusa hispida NC 008433 1              | 0,18099777 |
| Taxidea taxus NC020646 1               | Felis chaus NC028307 1                | 0,18099783 |
| Martes americana NC020642 1            | Lynx rufus NC014456 3                 | 0,18099803 |
| Potos flavus T414 1                    | Otocolobus manul NC028323 1           | 0,18099853 |
| Vulpes vulpes NC008434 5               | Lynx pardinus NC028319 161            | 0,18099855 |
| Zalophus wolfebaeki SRR4431565 1       | Melogale moschata V0735A 1            | 0,18099882 |
| Viverricula indica XK891751 1          | Poecilogale albinucha T602 1          | 0,18100388 |
| Procyon lotor AB462049 4               | Prionailurus bengalensis NC028301 12  | 0,18100467 |
| Otaria byronia OTAB 1                  | Neovison vison NC020641 3             | 0,18100482 |
| Procyon lotor AB462046 3               | Leopardus wiedii NC028318 1           | 0,18100516 |
| Melogale moschata NC020644 1           | Leopardus jacobita NC028322 1         | 0,18100522 |
| Otocyon megalotis SAF1 2               | Leopardus pardalis T262 1             | 0,18100716 |
| Ommatophoca rossii AY377287etc 1       | Mungotictis decemlineata NC027828 1   | 0,18100987 |
| Mungos mungo/gambianus SRR7704821 1    | Canis lupus chanco NC010340 4         | 0,18101035 |
| Speothos venaticus C48 2               | Hydrurga leptonyx NC008425 1          | 0,18101069 |
| Poecilogale albinucha T602 1           | Arctodus simus NC011116 1             | 0,18101108 |
| Neovison vison NC020641 3              | Felis chaus NC028307 1                | 0,18101087 |
| Zalophus wolfebaeki SRR4431565 1       | Mustela altaica NC021751 1            | 0,18101186 |
| Ursus thibetanus laniger MH281753 2    | Martes americana NC020642 1           | 0,18101206 |
| Prionailurus planiceps KY682741 4      | Ictonyx striatus T299 1               | 0,18101239 |
| Leopardus wiedii NC028318 1            | Ictonyx striatus T299 1               | 0,18101247 |
| Meles leucurus NC039173 4              | Helarctos malayanus NC009968 2        | 0,18101268 |
| Pusa hispida NC 008433 1               | Prionodon pardicolor NC024569 2       | 0,18101297 |
| Ursus thibetanus formosanus NC009331 1 | Melogale moschata NC020644 1          | 0,18101433 |
| Ursus spelaeus NC011112 8              | Meles anakuma NC009677 1              | 0,18101482 |
| Ursus thibetanus thibetanus NC011118 4 | Ailurus fulgens styani NC009691 1     | 0,18101556 |
| Ursus spelaeus NC011112 8              | Ailurus fulgens styani NC009691 1     | 0,18101592 |
| Smilodon populator MF871700 1          | Canis lupus familiaris NC002008 1231  | 0,18101616 |
| Prionailurus bengalensis CNM45 20      | Ictonyx striatus T299 1               | 0,18101721 |
| Melursus ursinus NC009970 2            | Martes foina NC020643 1               | 0,18102232 |
| Chrysocyon brachyurus NC024172 1       | Catopuma temminckii NC027115 41       | 0,18102324 |
| Fossa fossana D350 1                   | Eumetopias jubatus NC004030 10        | 0,18102577 |
| Neofelis nebulosa NC008450 3           | Mirounga leonina NC008422 1           | 0,18103071 |
| Paradoxurus jerdoni MH464793 1         | Canis lupus chanco NC010340 4         | 0,18103501 |
| Catopuma temminckii NC027115 41        | Canis lupus familiaris NC002008 1231  | 0,18103732 |
| Prionailurus planiceps KY682741 4      | Martes flavigula NC012141 3           | 0,18103999 |
| Mustela altaica NC021751 1             | Civettictis civetta NC033378 1        | 0,18104227 |
| Lutra lutra NC011358 9                 | Arctocepalus australis MG023139 1     | 0,18104595 |
| Mustela sibirica NC020637 6            | Genetta abyssinica MG489822 1         | 0,18104888 |
| Martes foina NC020643 1                | Civettictis civetta NC033378 1        | 0,18104975 |
| Mustela itarsi NC034330 19             | Conepatus chinga NC042596 1           | 0,18105273 |
| Vulpes lagopus NC026529 3              | Pusa sibirica NC008432 2              | 0,18105295 |
| Meles meles T303 3                     | Canis latrans NC008093 7              | 0,18105581 |
| Puma yagouaroundi NC028311 1           | Lutra lutra LC050126 1                | 0,18105844 |
| Meles anakuma NC009677 1               | Leopardus wiedii NC028318 1           | 0,18105982 |
| Meles leucurus NC039173 4              | Leopardus jacobita NC028322 1         | 0,18105988 |
| Leopardus jacobita NC028322 1          | Arctonx collaris NC020645 1           | 0,18106015 |
| Leopardus wiedii NC028318 1            | Arctonx collaris NC020645 1           | 0,18106022 |
| Prionailurus planiceps KY682741 4      | Meles leucurus NC039173 4             | 0,18106034 |
| Melursus ursinus NC009970 2            | Eumetopias jubatus NC004030 10        | 0,18106276 |
| Viverra tangalunga MH464792 1          | Prionailurus planiceps KY682741 4     | 0,18106404 |
| Ursus arctos isabellinus 1885 2        | Melogale moschata KP726273 1          | 0,18106441 |
| Suricata suricatta SSM10 1             | Monachus schauinslandi NC008421 1     | 0,18106425 |
| Prionailurus planiceps NC028312 6      | Mustela sibirica NC020637 6           | 0,18106428 |
| Viverra tangalunga MH464792 1          | Otocolobus manul NC028323 1           | 0,18106511 |
| Vulpes ferrillata NC027935 1           | Viverricula indica NC025296 2         | 0,18106511 |
| Civettictis civetta GLC19 1            | Canis latrans NC008093 7              | 0,18106531 |
| Otocolobus manul NC028323 1            | Mustela erminea T305 2                | 0,18106684 |
| Ursus arctos isabellinus 1885 2        | Meles leucurus NC039173 4             | 0,18106687 |
| Ursus arctos pruinosus MG066703 3      | Meles meles T303 3                    | 0,18106703 |
| Ursus arctos isabellinus 1885 2        | Mustela sibirica AP017394 11          | 0,18106773 |
| Ursus arctos isabellinus 1885 2        | Mustela sibirica NC020637 6           | 0,18106778 |
| Procyon lotor AB462046 3               | Arctodus simus NC011116 1             | 0,18106851 |
| Paradoxurus jerdoni MH464793 1         | Monachus schauinslandi NC008421 1     | 0,18106942 |
| Ursus maritimus NC003428 31            | Mustela kathiah NC023210 1            | 0,18107006 |
| Genetta abyssinica MG489822 1          | Canis lupus familiaris NC002008 1231  | 0,18107133 |
| Canis adustus KT448271 1               | Arctotherium sp NC030174 1            | 0,18107204 |
| Prionailurus planiceps KY682741 4      | Mustela altaica NC021751 1            | 0,18107243 |
| Phoca groenlandica NC008429 54         | Panthera pardus japonensis KJ866876 8 | 0,18107247 |
| Melogale moschata NC020644 1           | Felis silvestris lybica KP202275 4    | 0,18107316 |
| Smilodon populator MF871700 1          | Ailurus fulgens NC011124 1            | 0,18107356 |
| Melogale moschata NC020644 1           | Leopardus guigna NC028321 1           | 0,18107435 |
| Melogale moschata NC020644 1           | Leopardus geoffroyi NC028320 1        | 0,18107456 |
| Puma yagouaroundi NC028311 1           | Martes martes T302 3                  | 0,18107463 |
| Ommatophoca rossii AY377287etc 1       | Urua semitorquata MH464789 1          | 0,18107608 |
| Neovison vison NC020641 3              | Felis margarita NC028308 1            | 0,18107677 |
| Ursus thibetanus thibetanus NC011118 4 | Fossa fossana D350 1                  | 0,18107806 |
| Ursus thibetanus formosanus NC009331 1 | Ailurus fulgens NC011124 1            | 0,18107872 |
| Leopardus pardalis T262 1              | Ictonyx striatus T299 1               | 0,18107912 |
| Prionailurus rubiginosus NC028304 2    | Lycalopex secureae KT448284 1         | 0,18107957 |
| Zalophus californianus NC008416 1      | Mustela kathiah NC023210 1            | 0,18108143 |
| Zalophus wolfebaeki SRR4431565 1       | Martes foina NC020643 1               | 0,18108156 |
| Ursus spelaeus NC016470 22             | Ursus arctos isabellinus 1885 2       | 0,18108395 |
| Pusa hispida NC 008433 1               | Proteles cristata T393 6              | 0,18108447 |
| Ursus thibetanus formosanus NC009331 1 | Mustela altaica NC021751 1            | 0,18108463 |
| Ursus spelaeus NC011112 8              | Aonyx cinerea NC035814 2              | 0,18108504 |

|                                       |                                       |            |
|---------------------------------------|---------------------------------------|------------|
| Paradoxurus hermaphroditus NLNC 1     | Nasua nasua NC020647 1                | 0,19850844 |
| Parahaena brunnea NC038159 15         | Nasua nasua NC020647 1                | 0,19850925 |
| Panthera pardus japonensis KJ866876   | Bassaricyon neblina SRX1097850 1      | 0,19851296 |
| Vulpes vulpes NC008434 5              | Odobenus rosmarus NC004029 29         | 0,19851752 |
| Vulpes corsac NC023958 1              | Odobenus rosmarus NC004029 29         | 0,19851777 |
| Ursus arctos pruinosus MG066703 3     | Crocota crocata NC020670 3            | 0,19852702 |
| Urocyon cinereoargenteus NC026723 2   | Panthera uncia NC010638 1             | 0,19857515 |
| Paradoxurus hermaphroditus NC03959    | Odobenus rosmarus NC004029 29         | 0,19858111 |
| Galidia elegans D146 1                | Ailuropoda melanoleuca NC009492 5     | 0,19858363 |
| Martes pennanti NC020664 16           | Tapirus terrestris T358               | 0,19861932 |
| Vulpes zerda KJ603240 1               | Bassaricyon neblina SRX1097850 1      | 0,1986295  |
| Vulpes ferrillata NC027935 1          | Bassaricyon neblina SRX1097850 1      | 0,19863079 |
| Proteles cristata T393 6              | Cuon alpinus NC013445 3               | 0,19863352 |
| Prionodon linsang ERR2391707 1        | Bassaricyon neblina SRX1097850 1      | 0,19863413 |
| Urocyon littoralis catalinae KP129018 | Proteles cristata T393 6              | 0,19864742 |
| Proteles cristata T393 6              | Mephitis mephitis NC020648 1          | 0,19866508 |
| Panthera leo NERO 19                  | Bassaricyon neblina SRX1097850 1      | 0,19867964 |
| Vulpes corsac NC023958 1              | Bassaricyon neblina SRX1097850 1      | 0,19869789 |
| Urocyon littoralis catalinae KP129018 | Ailurus fulgens NC011124 1            | 0,19869971 |
| Pardofelis marmorata NLN3 2           | Mellivora capensis T370 1             | 0,19870885 |
| Proteles cristata T393 6              | Nasua nasua NC020647 1                | 0,19871473 |
| Panthera tigris amoyensis NC014770 2  | Nasua nasua NC020647 1                | 0,19872186 |
| Chrysocyon brachyurus NC024172 1      | Bassaricyon neblina SRX1097850 1      | 0,19872521 |
| Nasua nasua NC020647 1                | Arctictis binturong T605 2            | 0,19872561 |
| Helarctos malayanus NC009968 2        | Mellivora capensis T370 1             | 0,19874826 |
| Panthera pardus NC010641 5            | Bassaricyon neblina SRX1097850 1      | 0,19875902 |
| Urocyon littoralis catalinae KP129018 | Panthera uncia NC010638 1             | 0,19877708 |
| Speothos venaticus C48 2              | Bassaricyon neblina SRX1097850 1      | 0,19877887 |
| Viverricula indica XK891751 1         | Nasua nasua NC020647 1                | 0,19884332 |
| Urocyon littoralis catalinae KP129018 | Melursus ursinus NC009970 2           | 0,19885546 |
| Odobenus rosmarus NC004029 29         | Cryptoprocta ferox CF13 1             | 0,19887085 |
| Ursus maritimus GU573488 Svalbard     | Urocyon cinereoargenteus NC026723 2   | 0,19890985 |
| Ursus maritimus GU573488 Svalbard     | Urocyon littoralis catalinae KP129018 | 0,19890989 |
| Mellivora capensis T370 1             | Leopardus wiedii NC028318 1           | 0,19891113 |
| Spilogale putorius NC010497 1         | Tapirus terrestris T358               | 0,19892111 |
| Urocyon cinereoargenteus NC026723 2   | Melursus ursinus NC009970 2           | 0,19892272 |
| Neofelis nebulosa NC008450 3          | Bassaricyon neblina SRX1097850 1      | 0,19895336 |
| Ursus arctos EU497665 29              | Urocyon cinereoargenteus NC026723 2   | 0,19897729 |
| Vulpes zerda KJ603240 1               | Ailuropoda melanoleuca NC009492 5     | 0,19898374 |
| Odobenus rosmarus NC004029 29         | Xenogale naso C07XAR110 1             | 0,19898811 |
| Helarctos malayanus NC009968 2        | Tapirus terrestris T358               | 0,19898869 |
| Salanoia concolor D378 1              | Nasua nasua NC020647 1                | 0,19903491 |
| Paradoxurus jerdoni MH464793 1        | Nasua nasua NC020647 1                | 0,19904721 |
| Viverricula indica NC025296 2         | Mellivora capensis T370 1             | 0,19910671 |
| Melogale moschata NC020644 1          | Tapirus terrestris T358               | 0,19911003 |
| Mellivora capensis T370 1             | Lynx canadensis NC028313 1            | 0,19911182 |
| Ursus arctos EU497665 29              | Urocyon littoralis catalinae KP129018 | 0,199112   |
| Prionailurus viverrinus NC028305 1    | Mellivora capensis T370 1             | 0,19911408 |
| Speothos venaticus C48 2              | Proteles cristata T393 6              | 0,19913156 |
| Urocyon littoralis catalinae KP129018 | Conepatus chinga NC042596 1           | 0,19916312 |
| Mellivora capensis T370 1             | Leopardus tigrinus NC028317 1         | 0,19918044 |
| Odobenus rosmarus NC004029 29         | Urua brachyura KY117547 1             | 0,199186   |
| Vulpes lagopus NC026529 3             | Odobenus rosmarus NC004029 29         | 0,19919245 |
| Ursus arctos AP012576 6               | Urocyon cinereoargenteus NC026723 2   | 0,19919571 |
| Ursus arctos AP012576 6               | Urocyon littoralis catalinae KP129018 | 0,19919579 |
| Odobenus rosmarus NC004029 29         | Arctictis binturong T605 2            | 0,19920538 |
| Urocyon littoralis catalinae KP129018 | Cynogale bennetti KY117544 1          | 0,1992413  |
| Nasua nasua NC020647 1                | Ichneumia albicauda T603 1            | 0,19924858 |
| Urocyon cinereoargenteus NC026723 2   | Conepatus chinga NC042596 1           | 0,19929783 |
| Odobenus rosmarus NC004029 29         | Galarella sanguinea T378 1            | 0,19933659 |
| Mellivora capensis T370 1             | Genetta servalina NC024568 2          | 0,19937405 |
| Urocyon cinereoargenteus NC026723 2   | Cynogale bennetti KY117544 1          | 0,19937615 |
| Odobenus rosmarus NC004029 29         | Nyctereutes procyonoides NC013700 3   | 0,19939533 |
| Cuon alpinus NC013445 3               | Tapirus terrestris T358               | 0,19940962 |
| Parahaena brunnea NC038159 15         | Odobenus rosmarus NC004029 29         | 0,19941206 |
| Cryptoprocta ferox CF13 1             | Conepatus chinga NC042596 1           | 0,19944093 |
| Mephitis mephitis NC020648 1          | Cryptoprocta ferox CF13 1             | 0,19946693 |
| Panthera uncia NC010638 1             | Odobenus rosmarus NC004029 29         | 0,19947594 |
| Nasua nasua NC020647 1                | Urua javanica/aruopunctata NC006835   | 0,19947733 |
| Odobenus rosmarus NC004029 29         | Crocota crocata NC020670 3            | 0,1994828  |
| Panthera pardus NC010641 5            | Nasua nasua NC020647 1                | 0,19949719 |
| Mellivora capensis T370 1             | Lynx lynx NC027083 4                  | 0,19951552 |
| Ursus arctos GU573491 207             | Urocyon cinereoargenteus NC026723 2   | 0,19951582 |
| Ursus arctos GU573491 207             | Urocyon littoralis catalinae KP129018 | 0,19951586 |
| Panthera onca KP202264 2              | Mellivora capensis T370 1             | 0,19951701 |
| Potos flavus T414 1                   | Tapirus terrestris T358               | 0,19955854 |
| Urocyon littoralis catalinae KP129018 | Galidia elegans D146 1                | 0,19957256 |
| Vulpes lagopus NC026529 3             | Lutrogale perspicillata NC035811 1    | 0,19963661 |
| Ictonyx striatus T299 1               | Tapirus terrestris T358               | 0,19964534 |
| Melogale moschata KP726273 1          | Tapirus terrestris T358               | 0,19965041 |
| Ursus arctos isabellinus 1885 2       | Tapirus terrestris T358               | 0,19965065 |
| Mellivora capensis T370 1             | Leopardus geoffroyi NC028320 1        | 0,19965321 |
| Crocota crocata NC020670 3            | Canis mesomelas KT448280 1            | 0,19965732 |
| Odobenus rosmarus NC004029 29         | Mungotictis decemlineata NC027828 1   | 0,19966868 |
| Mellivora capensis T370 1             | Fossa fossana D350 1                  | 0,19969694 |
| Urocyon cinereoargenteus NC026723 2   | Galidia elegans D146 1                | 0,19970722 |
| Odobenus rosmarus NC004029 29         | Ichneumia albicauda T603 1            | 0,19974133 |
| Odobenus rosmarus NC004029 29         | Urua javanica/aruopunctata NC006835   | 0,19976789 |
| Vulpes zerda KJ603240 1               | Cynogale bennetti KY117544 1          | 0,19977784 |
| Ursus arctos pruinosus MG066703 3     | Tapirus terrestris T358               | 0,19979341 |
| Panthera tigris NC010642 35           | Odobenus rosmarus NC004029 29         | 0,19982255 |
| Ursus maritimus NC003428 31           | Urocyon cinereoargenteus NC026723 2   | 0,1998525  |
| Ursus maritimus NC003428 31           | Urocyon littoralis catalinae KP129018 | 0,19985254 |
| Ursus maritimus GU573488 Svalbard     | Tapirus terrestris T358               | 0,19985326 |
| Ursus arctos GU573486 5               | Urocyon cinereoargenteus NC026723 2   | 0,19985852 |
| Ursus arctos GU573486 5               | Urocyon littoralis catalinae KP129018 | 0,19985852 |
| Mellivora capensis T370 1             | Callorhinus ursinus NC008415 1        | 0,19990081 |
| Lontra canadensis SRR10409165 1       | Cynogale bennetti KY117544 1          | 0,19990942 |
| Paradoxurus hermaphroditus NC03959    | Lutrogale perspicillata NC035811 1    | 0,19991729 |
| Ursus arctos GU573491 207             | Tapirus terrestris T358               | 0,19992043 |
| Spilogale putorius NC010497 1         | Proteles cristata T393 6              | 0,19997406 |
| Odobenus rosmarus NC004029 29         | Neofelis nebulosa NC008450 3          | 0,1999844  |
| Speothos venaticus C48 2              | Lutrogale perspicillata NC035811 1    | 0,19998492 |

|                                        |                                        |            |                                        |                                       |            |
|----------------------------------------|----------------------------------------|------------|----------------------------------------|---------------------------------------|------------|
| Proteles cristata T393 6               | Phoca vitulina NC001325 1              | 0,18108578 | Prionailurus rubiginosus NC028304 2    | Mellivora capensis T370 1             | 0,19998908 |
| Viverricula indica KX891745 1          | Chrysocony brachyurus NC024172 1       | 0,18108596 | Suricata suricatta SSM10 1             | Odobenus rosmarus NC004029 29         | 0,19999596 |
| Ursus thibetanus laniger MH281753 2    | Martes foina NC020643 1                | 0,18108957 | Neofelis nebulosa NC008450 3           | Nasua nasua NC020647 1                | 0,20003101 |
| Zalophus wollebaeki SRR4431565 1       | Ursus spelaeus NC011112 8              | 0,18109263 | Canis lupinus NC013445 3               | Bassaricyon neblina SRX1097850 1      | 0,20003273 |
| Zalophus californianus NC008416 1      | Ursus arctos GU573486 5                | 0,18109594 | Nasua nasua NC020647 1                 | Eupleres goudoti D128 1               | 0,20004144 |
| Martes foina NC020643 1                | Acinonyx jubatus NC005212 3            | 0,1810962  | Nasua nasua NC020647 1                 | Ura vajanica T413 1                   | 0,2000436  |
| Ursus americanus JX196366 3            | Arctocepalus forsteri KT693377 17      | 0,1810964  | Mellivora capensis T370 1              | Lynx rufus NC014456 3                 | 0,20005473 |
| Prionailurus rubiginosus NC028304 2    | Canis lupus familiaris NC002008 1231   | 0,18110041 | Urocyon cinereoargenteus NC026723 2    | Lutrogale perspicillata NC035811 1    | 0,20010833 |
| Neovison vison NC020641 3              | Canis lupus familiaris NC002008 1231   | 0,18110071 | Mellivora capensis T370 1              | Felis chaus NC028307 1                | 0,20012437 |
| Smilodon populator MF871700 1          | Bassariscus sumichrasti SRX1099089 1   | 0,1811008  | Spilogale putorius NC010497 1          | Neofelis nebulosa NC008450 3          | 0,20013738 |
| Martes flavigula NC012141 3            | Lynx rufus NC014456 3                  | 0,18110992 | Spilogale putorius NC010497 1          | Otocyon megalotis SAF1 2              | 0,20016198 |
| Neophoca cinerea NC008419 1            | Lutra lutra NC0011358 9                | 0,18111348 | Odobenus rosmarus NC004029 29          | Canis aureus KT448274 1               | 0,20019491 |
| Mustela nigripes NC024942 1            | Genetta abyssinica MG489822 1          | 0,18111435 | Odobenus rosmarus NC004029 29          | Cynictis penicillata T375 1           | 0,20019792 |
| Arctonyx collaris NC020645 1           | Arctocepalus gazella BK010918 1        | 0,1811149  | Odobenus rosmarus NC004029 29          | Hyaena hyaena NC020669 1              | 0,20021586 |
| Martes americana NC020642 1            | Arctocepalus australis MG023139 1      | 0,18111882 | Ursus americanus JX196366 3            | Tapirus terrestris T358               | 0,20021819 |
| Phocarcotus hookeri NC008418 1         | Mellogale moschata KP726273 1          | 0,18111882 | Nasua nasua NC020647 1                 | Cynictis penicillata T375 1           | 0,20024487 |
| Martes pennanti NC020664 16            | Callorhinus ursinus NC008415 1         | 0,18112177 | Viverricula indica KX891745 1          | Mellivora capensis T370 1             | 0,20024848 |
| Zalophus californianus NC008416 1      | Ursus americanus JX196366 3            | 0,18112242 | Mellivora capensis T370 1              | Civettictis civetta GLC19 1           | 0,20024927 |
| Taxidea taxus NC020646 1               | Suricata suricatta SSM10 1             | 0,18112522 | Mellivora capensis T370 1              | Leptailurus serval NC028316 1         | 0,20025901 |
| Martes pennanti NC020664 16            | Arctotherium sp NC030174 1             | 0,18112548 | Otocolobus manul NC028323 1            | Mellivora capensis T370 1             | 0,20025918 |
| Otaria byronia OTAB 1                  | Mustela eversmanni NC028013 1          | 0,18112601 | Urocyon cinereoargenteus NC026723 2    | Mephitis mephitis NC020648 1          | 0,20027289 |
| Lynx canadensis NC028313 1             | Lutra lutra LC050126 1                 | 0,18112801 | Prionodon pardicolor NC024569 2        | Odobenus rosmarus NC004029 29         | 0,20028119 |
| Leopardus tigrinus NC028317 1          | Enhydra lutris NC009692 1              | 0,18112814 | Lutrogale perspicillata NC035811 1     | Cuon alpinus NC013445 3               | 0,20028444 |
| Neovison vison NC020641 3              | Fossa fossana D350 1                   | 0,18112825 | Vulpes vulpes NC008434 5               | Tapirus terrestris T358               | 0,20031521 |
| Meles anakuma NC009677 1               | Felis silvestris lybica KP202275 4     | 0,18112859 | Ursus arctos NC020647 1                | Cryptoprocta ferox CF13 1             | 0,20038959 |
| Felis margarita NC028308 1             | Arctonyx collaris NC020645 1           | 0,18112901 | Ursus arctos pruinosus MG066703 3      | Urocyon cinereoargenteus NC026723 2   | 0,20039134 |
| Felis margarita NC028308 1             | Ailurus fulgens styani NC009691 1      | 0,18112916 | Ursus maritimus NC003428 31            | Tapirus terrestris T358               | 0,20039322 |
| Poecilogale albinucha T602 1           | Arctocepalus gazella BK010918 1        | 0,18112974 | Nasua nasua NC020647 1                 | Lycalopex sechurae KT448284 1         | 0,20039243 |
| Viverricula indica KX891745 1          | Mustela nigripes NC024942 1            | 0,18113065 | Odobenus rosmarus NC004029 29          | Bdeogale nigripes GLC15 1             | 0,20040143 |
| Ursus thibetanus mupinensis NC008753 2 | Martes zibellina NC011579 39           | 0,18113089 | Urocyon littoralis catalinae KP129018  | Lutrogale perspicillata NC035811 1    | 0,20044498 |
| Halichoerus grypus NC001602 2          | Arctictis binturong T605 2             | 0,18113099 | Mellogale moschata V0735A 1            | Tapirus terrestris T358               | 0,2004602  |
| Prionailurus bengalensis NC028301 12   | Lutra sumatrana NC035810 1             | 0,18113129 | Ursus spelaeus EU327344 13             | Tapirus terrestris T358               | 0,20047837 |
| Mustela sibirica NC020637 6            | Genetta servalina NC024568 2           | 0,18113135 | Odobenus rosmarus NC004029 29          | Canis lupus familiaris NC002008 1231  | 0,2004941  |
| Viverra tatalunga MH464792 1           | Felis catus NC001700 2                 | 0,18113156 | Nasua nasua NC020647 1                 | Mungotictis decemlineata NC027828 1   | 0,20051624 |
| Mustela sibirica NC020637 6            | Civettictis civetta GLC19 1            | 0,18113178 | Cuon alpinus NC013445 3                | Crocota crocota NC020670 3            | 0,20052309 |
| Paradoxurus hermaphroditus NC039591 1  | Mustela erminea T305 2                 | 0,18113321 | Urocyon cinereoargenteus NC026723 2    | Crocota crocota NC020670 3            | 0,20053306 |
| Paradoxurus hermaphroditus NLNC 1      | Conepatus chinga NC042596 1            | 0,18113343 | Ursus arctos GU573486 5                | Tapirus terrestris T358               | 0,20053658 |
| Melursus ursinus NC009970 2            | Martes flavigula NC012141 3            | 0,18113364 | Ursus thibetanus thibetanus NC01118 4  | Mellivora capensis T370 1             | 0,20053989 |
| Ursus maritimus GU573488 Svalbard      | Meles leucurus NC039173 4              | 0,18113409 | Proteles cristata T393 6               | Canis mesomelas KT448280 1            | 0,20055962 |
| Zalophus wollebaeki SRR4431565 1       | Mustela eversmanni NC028013 1          | 0,18113422 | Arctotherium sp NC030174 1             | Tapirus terrestris T358               | 0,20057255 |
| Prionailurus bengalensis NC028301 12   | Martes americana NC020642 1            | 0,18113445 | Urocyon arctos pruinosus MG066703 3    | Urocyon littoralis catalinae KP129018 | 0,20059338 |
| Mustela sibirica AP017394 11           | Canis aureus KT448274 1                | 0,18113616 | Ursus arctos AP012576 6                | Tapirus terrestris T358               | 0,20060861 |
| Prionailurus bengalensis CKM45 20      | Mustela itatsi NC034330 19             | 0,18113631 | Urocyon littoralis catalinae KP129018  | Mephitis mephitis NC020648 1          | 0,20060953 |
| Paradoxurus hermaphroditus NLNC 1      | Monachus schauinslandi NC008421 1      | 0,18113698 | Odobenus rosmarus NC004029 29          | Lycalopex sechurae KT448284 1         | 0,20069282 |
| Meles leucurus NC039173 4              | Arctocepalus forsteri NC004023 28      | 0,18113734 | Lutrogale perspicillata NC035811 1     | Diplogale hoesi MH464790 1            | 0,20072176 |
| Phoca vitulina NC001325 1              | Galidia elegans D146 1                 | 0,18113792 | Ailuropoda melanoleuca NC009492 5      | Tapirus terrestris T358               | 0,2007256  |
| Prionailurus bengalensis CKM45 20      | Martes zibellina NC011579 39           | 0,18113859 | Ursus thibetanus mupinensis NC008753 2 | Mellivora capensis T370 1             | 0,20072868 |
| Mustela nivalis T306 5                 | Lynx rufus NC014456 3                  | 0,18114063 | Mellivora capensis T370 1              | Genetta abyssinica MG489822 1         | 0,20074116 |
| Leopardus pardalis NC028315 1          | Bassariscus sumichrasti SRX1099089 1   | 0,18114127 | Speothos venaticus C48 2               | Crocota crocota NC020670 3            | 0,20074947 |
| Panthera onca NC022842 1               | Mustela kathiah NC023210 1             | 0,18114246 | Nasua nasua NC020647 1                 | Cuon alpinus NC013445 3               | 0,20077194 |
| Zalophus wollebaeki SRR4431565 1       | Ursus thibetanus mupinensis NC008753 2 | 0,18114311 | Ursus spelaeus NC011112 8              | Tapirus terrestris T358               | 0,20081571 |
| Lynx lynx NC027083 4                   | Canis aureus KT448274 1                | 0,18114352 | Spilogale putorius NC010497 1          | Galidia elegans D146 1                | 0,20084403 |
| Ursus thibetanus thibetanus NC01118 4  | Arctocepalus forsteri KT693377 17      | 0,18114366 | Nasua nasua NC020647 1                 | Lycalopex sechurae KT448284 1         | 0,20095637 |
| Ursus arctos GU573486 5                | Arctocepalus pusillus NC008417 1       | 0,18114406 | Ommatophoca rossii AY377287etc 1       | Mellivora capensis T370 1             | 0,20096067 |
| Ursus thibetanus mupinensis NC008753 2 | Leopardus pardalis NC028315 1          | 0,18114555 | Mellivora capensis T370 1              | Civettictis civetta NC033378 1        | 0,20096782 |
| Ursus thibetanus formosanus NC009331 1 | Lutra sumatrana NC035810 1             | 0,18114574 | Viverricula indica KX891751 1          | Mellivora capensis T370 1             | 0,2009894  |
| Phoca groenlandica NC008429 54         | Panthera tigris amoyensis NC014770 2   | 0,18114841 | Otocyon megalotis SAF1 2               | Tapirus terrestris T358               | 0,20098971 |
| Profelis aurata NC028299 1             | Ictonyx striatus T299 1                | 0,18114933 | Galictis vittata T412 1                | Tapirus terrestris T358               | 0,20099823 |
| Ursus spelaeus NC011112 8              | Arctocepalus gazella BK010918 1        | 0,18115    | Puma yagouaroundi NC028311 1           | Mellivora capensis T370 1             | 0,2009991  |
| Ursus spelaeus NC011112 8              | Ailurus fulgens NC011124 1             | 0,18115056 | Paradoxurus hermaphroditus NC039591    | Bassaricyon neblina SRX1097850 1      | 0,20100228 |
| Martes americana NC020642 1            | Acinonyx jubatus NC005212 3            | 0,18115073 | Odobenus rosmarus NC004029 29          | Canis lupus chanco NC010340 4         | 0,20105249 |
| Helarctos malayanus NC009968 2         | Civettictis civetta GLC19 1            | 0,18115364 | Odobenus rosmarus NC004029 29          | Canis latrans NC008093 7              | 0,20107473 |
| Zalophus californianus NC008416 1      | Mellogale moschata NC020644 1          | 0,18115367 | Vulpes zerdia K1603240 1               | Tapirus terrestris T358               | 0,20111981 |
| Mustela altaica NC021751 1             | Acinonyx jubatus NC005212 3            | 0,18115477 | Nasua nasua NC020647 1                 | Diplogale hoesi MH464790 1            | 0,20113058 |
| Meles meles T303 3                     | Diplogale hoesi MH464790 1             | 0,18115573 | Puma concolor NC016470 22              | Mellivora capensis T370 1             | 0,20120053 |
| Mirounga angustirostris SRR10331586 1  | Chrysocony brachyurus NC024172 1       | 0,18115692 | Prionailurus bengalensis CKM45 20      | Mellivora capensis T370 1             | 0,2012046  |
| Helarctos malayanus NC009968 2         | Genetta abyssinica MG489822 1          | 0,18116367 | Urocyon littoralis catalinae KP129018  | Crocota crocota NC020670 3            | 0,20120622 |
| Spilogale putorius NC010497 1          | Mustela eversmanni NC028013 1          | 0,18116386 | Nasua nasua NC020647 1                 | Crocota crocota NC020670 3            | 0,20120759 |
| Phoca groenlandica NC008429 54         | Canis lupus chanco NC010340 4          | 0,18116421 | Mellivora capensis T370 1              | Crossarchus platycephalus C7R66 1     | 0,20124722 |
| Mustela frenata NC020640 1             | Diplogale hoesi MH464790 1             | 0,18116421 | Vulpes zerdia K1603240 1               | Nasua nasua NC020647 1                | 0,20125546 |
| Leopardus colocolo NC028314 1          | Canis aureus KT448274 1                | 0,18116818 | Odobenus rosmarus NC004029 29          | Lycalon pictus NC028422 2             | 0,20128854 |
| Martes flavigula NC012141 3            | Leptailurus serval NC028316 1          | 0,18117213 | Mellivora capensis T370 1              | Leopardus jacobita NC028322 1         | 0,20133524 |
| Panthera pardus NC010641 5             | Mirounga angustirostris SRR10331586 1  | 0,1811755  | Ursus arctos EU497665 29               | Tapirus terrestris T358               | 0,20133568 |
| Vulpes lagopus NC026529 3              | Halichoerus grypus NC001602 2          | 0,1811758  | Mellivora capensis T370 1              | Leopardus guigna NC028321 1           | 0,20133664 |
| Mellogale moschata V0735A 1            | Callorhinus ursinus NC008415 1         | 0,18118121 | Panthera leo spelaea KX258452 2        | Bassaricyon neblina SRX1097850 1      | 0,20135613 |
| Mustela sibirica AP017394 11           | Arctocepalus townsendi NC008420 1      | 0,18118393 | Panthera onca NC022842 1               | Mellivora capensis T370 1             | 0,201415   |
| Martes pennanti NC020664 16            | Canis adustus KT448271 1               | 0,18118523 | Urocyon cinereoargenteus NC026723 2    | Tapirus terrestris T358               | 0,20144764 |
| Arctocepalus gazella BK010918 1        | Ailurus fulgens NC011124 1             | 0,18118531 | Prionailurus bengalensis NC028301 12   | Mellivora capensis T370 1             | 0,20147039 |
| Fossa fossana D350 1                   | Callorhinus ursinus NC008415 1         | 0,18118571 | Zalophus wollebaeki SRR4431565 1       | Mellivora capensis T370 1             | 0,20153518 |
| Fossa fossana D350 1                   | Arctocepalus forsteri KT693377 17      | 0,1811873  | Ursus thibetanus formosanus NC009331 1 | Mellivora capensis T370 1             | 0,20154697 |
| Potos flavus T414 1                    | Arctocepalus forsteri KT693377 17      | 0,18118806 | Ursus spelaeus NC011112 8              | Mellivora capensis T370 1             | 0,20155013 |
| Martes pennanti NC020664 16            | Homotherium latidens MF871702 3        | 0,18118836 | Vulpes corsac NC023958 1               | Tapirus terrestris T358               | 0,20158853 |
| Viverra tatalunga MH464792 1           | Neophoca cinerea NC008419 1            | 0,18118848 | Odobenus rosmarus NC004029 29          | Cuon alpinus NC013445 3               | 0,20159587 |
| Crossarchus platycephalus C7R66 1      | Arctocepalus pusillus NC008417 1       | 0,18119058 | Viverra zibetha T609 1                 | Mellivora capensis T370 1             | 0,2015959  |
| Mustela erminea T305 2                 | Canis anthus NC027956 2                | 0,18119434 | Urocyon littoralis catalinae KP129018  | Galictis vittata T412 1               | 0,20168337 |
| Potos flavus T414 1                    | Otaria byronia OTAB 1                  | 0,18119529 | Urocyon cinereoargenteus NC026723 2    | Odobenus rosmarus NC004029 29         | 0,2016879  |
| Mustela kathiah NC023210 1             | Lynx canadensis NC028313 1             | 0,18119653 | Mellivora capensis T370 1              | Leopardus colocolo NC028314 1         | 0,20169024 |
| Mustela eversmanni NC028013 1          | Lynx canadensis NC028313 1             | 0,18119764 | Urocyon littoralis catalinae KP129018  | Tapirus terrestris T358               | 0,20171387 |
| Phoca groenlandica NC008429 54         | Cynictis penicillata T375 1            | 0,18119766 | Ursus maritimus NC003428 31            | Mellivora capensis T370 1             | 0,20173912 |
| Viverra zibetha T609 1                 | Mustela eversmanni NC028013 1          | 0,18119812 | Mellivora capensis T370 1              | Acinonyx jubatus NC005212 3           | 0,20175695 |
| Potos flavus T414 1                    | Leptailurus serval NC028316 1          | 0,18120056 | Urocyon cinereoargenteus NC026723 2    | Galictis vittata T412 1               | 0,20181808 |
| Viverricula indica NC025296 2          | Ailurus fulgens NC011124 1             | 0,1812012  | Odobenus rosmarus NC004029 29          | Chrysocony brachyurus NC024172 1      | 0,20183006 |
| Prionodon pardicolor NC024569 2        | Mustela kathiah NC023210 1             | 0,18120255 | Otocyon megalotis SAF1 2               | Odobenus rosmarus NC004029 29         | 0,20183259 |
| Vulpes lagopus NC026529 3              | Monachus schauinslandi NC008421 1      | 0,18120335 | Spilogale putorius NC010497 1          | Crocota crocota NC020670 3            | 0,20186022 |
| Mungos mungo/gambianus SRR7704821 1    | Canis adustus KT448271 1               | 0,18120416 | Mellivora capensis T370 1              | Genetta genetta T297 1                | 0,20186898 |
| Procyon lotor AB462046 3               | Lynx lynx NC027083 4                   | 0,18120453 | Profelis aurata NC028299 1             | Mellivora capensis T370 1             | 0,2018753  |
| Leptailurus serval NC028316 1          | Canis latrans NC008093 7               | 0,18120469 | Nasua nasua NC020647 1                 | Chrysocony brachyurus NC024172 1      | 0,20188883 |
| Ursus maritimus GU573488 Svalbard      | Mustela kathiah NC023210 1             | 0,18120487 | Urocyon littoralis catalinae KP129018  | Odobenus rosmarus NC004029 29         | 0,20188977 |
| Otaria byronia OTAB 1                  | Mustela altaica NC021751 1             | 0,18120551 | Ursus maritimus GU573488 Svalbard      | Mellivora capensis T370 1             | 0,20194121 |
| Leopardus pardalis NC028315 1          | Arctocepalus pusillus NC008417 1       | 0,18120669 | Mellivora capensis T370 1              | Felis silvestris lybica KP202275 4    | 0,20194131 |
| Martes martes T302 3                   | Leopardus geoffroyi NC028320 1         | 0,18120749 | Paradoxurus hermaphroditus NC039591    | Nasua nasua NC020647 1                | 0,20194316 |
| Martes martes T302 3                   | Lynx rufus NC014456 3                  | 0,18120822 | Prionodon linsang ERR2391707 1         | Odobenus rosmarus NC004029 29         | 0,20194568 |
| Mustela frenata NC020640 1             | Canis mesomelas KT448280 1             | 0,18120866 | Mellivora capensis T370 1              | Helarctos malayanus NC009968 2        | 0,20195159 |

|                                        |                                       |            |
|----------------------------------------|---------------------------------------|------------|
| Genetta genetta T297 1                 | Bassariscus sumichrasti SRX1099089 1  | 0,18120915 |
| Phoca largha NC008430 1                | Diplogale hosei MH464790 1            | 0,18120924 |
| Martes foina NC020643 1                | Civettictis civetta GLC19 1           | 0,18120988 |
| Viverra zibetha T609 1                 | Martes foina NC020643 1               | 0,18121237 |
| Conepatus chinga NC042596 1            | Arctictis binturong T605 2            | 0,18121386 |
| Martes zibellina NC011579 39           | Arctocepalus forsteri NC004023 28     | 0,18121444 |
| Martes americana NC020642 1            | Arctocepalus forsteri NC004023 28     | 0,18121463 |
| Leopardus wiedii NC028318 1            | Canis aureus KT448274 1               | 0,18121468 |
| Mustela eversmanni NC028013 1          | Acinonyx jubatus NC005212 3           | 0,18121499 |
| Proteles cristata T393 6               | Phoca fasciata NC008428 1             | 0,18121544 |
| Phoca largha NC008430 1                | Chrysoyon brachyurus NC024172 1       | 0,18121559 |
| Melogale moschata NC020644 1           | Helarctos malayanus NC009968 2        | 0,18121754 |
| Melursus ursinus NC009970 2            | Martes martes T302 3                  | 0,18121772 |
| Zalophus californianus NC008416 1      | Martes pennanti NC020664 16           | 0,18122007 |
| Ursus thibetanus laniger MH281753 2    | Leopardus pardalis T262 1             | 0,1812236  |
| Mustela frenata NC020640 1             | Urva javanica/auropunctata NC006835 1 | 0,18122457 |
| Felis silvestris lybica KP202275 4     | Chrysoyon brachyurus NC024172 1       | 0,18122521 |
| Mustela nivalis T306 5                 | Leopardus colocolo NC028314 1         | 0,18122746 |
| Neovison vison NC020641 3              | Melursus ursinus NC009970 2           | 0,18123347 |
| Neovison vison NC020641 3              | Helarctos malayanus NC009968 2        | 0,181235   |
| Zalophus californianus NC008416 1      | Ursus spelaeus EU327344 13            | 0,18124279 |
| Melogale moschata V0735A 1             | Conepatus chinga NC042596 1           | 0,18124297 |
| Martes flavigula NC012141 3            | Leopardus geoffroyi NC028320 1        | 0,18124473 |
| Nasua nasua NC020647 1                 | Lontra canadensis SRR10409165 1       | 0,18124573 |
| Neofelis nebulosa NC008450 3           | Mirounga angustirostris SRR10331586 1 | 0,18124619 |
| Callorhinus ursinus NC008415 1         | Ailurus fulgens NC011124 1            | 0,18124899 |
| Arctocepalus forsteri KT693377 17      | Ailurus fulgens NC011124 1            | 0,18125123 |
| Martes zibellina NC011579 39           | Crossarchus platycephalus C7R66 1     | 0,1812517  |
| Neophoca cinerea NC008419 1            | Meles meles T303 3                    | 0,18125215 |
| Viverra tangalunga MH464792 1          | Arctocepalus forsteri KT693377 17     | 0,18125235 |
| Meles meles T303 3                     | Urva javanica T413 1                  | 0,18125257 |
| Phocarcotus hookeri NC008418 1         | Arctonyx collaris NC020645 1          | 0,18125285 |
| Paguma larvata PDD511 2                | Ommatophoca rossii AY377287etc 1      | 0,18125385 |
| Melogale moschata KP726273 1           | Arctocepalus gazella BK010918 1       | 0,18125418 |
| Nyctereutes procyonoides NC013700 3    | Crossarchus platycephalus C7R66 1     | 0,18125609 |
| Vulpes ferrilata NC027935 1            | Eryngathus barbatus NC008426 1        | 0,18125652 |
| Taxidea taxus NC020646 1               | Paradoxurus hermaphroditus NLNC 1     | 0,18125726 |
| Crossarchus platycephalus C7R66 1      | Aonyx cinerea NC035814 2              | 0,18125837 |
| Tremarctos ornatus NC009969 2          | Melogale moschata NC020644 1          | 0,18126014 |
| Martes melampus NC009678 1             | Civettictis civetta GLC19 1           | 0,18126032 |
| Mustela erminea T305 2                 | Mungotictis decemlineata NC027828 1   | 0,18126041 |
| Viverra zibetha T609 1                 | Melogale moschata KP726273 1          | 0,18126304 |
| Melogale moschata KP726273 1           | Genetta servalina NC024568 2          | 0,18126324 |
| Martes melampus NC009678 1             | Catopuma badia NC028300 1             | 0,18126395 |
| Mustela altaica NC021751 1             | Fossa fossana D350 1                  | 0,18126419 |
| Neovison vison NC020641 3              | Urva semitorquata MH464789 1          | 0,18126433 |
| Pusa sibirica NC008432 2               | Canis aureus KT448274 1               | 0,18126537 |
| Fossa fossana D350 1                   | Arctodus simus NC011116 1             | 0,18126565 |
| Mustela sibirica AP017394 11           | Civettictis civetta GLC19 1           | 0,18126626 |
| Mustela sibirica NC020637 6            | Leopardus jacobita NC028322 1         | 0,18126631 |
| Mustela nigripes NC024942 1            | Leopardus tigrinus NC028317 1         | 0,18126664 |
| Mustela putorius NC020638 4            | Felis silvestris lybica KP202275 4    | 0,18126652 |
| Ursus arctos EU497665 29               | Nandinia binotata NC024567 1          | 0,18126673 |
| Lutra sumatrana NC035810 1             | Leopardus jacobita NC028322 1         | 0,18126678 |
| Melogale moschata V0735A 1             | Lynx pardinus NC028319 161            | 0,18126725 |
| Tremarctos ornatus NC009969 2          | Prionailurus bengalensis NC028301 12  | 0,18126772 |
| Paradoxurus jerdoni MH464793 1         | Ailurus fulgens NC011124 1            | 0,18126924 |
| Prionodon pardicolor NC024569 2        | Arctonyx collaris NC020645 1          | 0,18126936 |
| Melogale moschata NC020644 1           | Civettictis civetta GLC19 1           | 0,18126981 |
| Nyctereutes procyonoides NC013700 3    | Leopardus wiedii NC028318 1           | 0,18127076 |
| Prionailurus viverrinus NC028305 1     | Martes zibellina NC011579 39          | 0,18127103 |
| Phoca vitulina NC001325 1              | Canis aureus KT448274 1               | 0,18127148 |
| Pusa sibirica NC008432 2               | Prionodon pardicolor NC024569 2       | 0,18127237 |
| Puma concolor NC016470 22              | Martes martes T302 3                  | 0,18127359 |
| Mustela altaica NC021751 1             | Leopardus pardalis T262 1             | 0,18127443 |
| Mustela erminea T306 5                 | Lynx lynx NC027083 4                  | 0,18127458 |
| Leopardus pardalis T262 1              | Arctocepalus pusillus NC008417 1      | 0,1812748  |
| Prionailurus planiceps KY682741 4      | Aonyx cinerea NC035814 2              | 0,18127485 |
| Zalophus wolbeaeki SRR4431565 1        | Melogale moschata NC020644 1          | 0,181275   |
| Prionailurus bengalensis CMM45 20      | Nyctereutes procyonoides NC013700 3   | 0,18127516 |
| Taxidea taxus NC020646 1               | Melursus ursinus NC009970 2           | 0,18127675 |
| Ursus thibetanus formosanus NC009331 1 | Arctocepalus gazella BK010918 1       | 0,18127817 |
| Meles anakuma NC009677 1               | Acinonyx jubatus NC005212 3           | 0,18127842 |
| Ursus spelaeus EU327344 13             | Melogale moschata KP726273 1          | 0,18127918 |
| Ursus thibetanus thibetanus NC011118 4 | Enhydra lutris NC009692 1             | 0,18127953 |
| Ursus thibetanus laniger MH281753 2    | Lutra sumatrana NC035810 1            | 0,18128078 |
| Ursus thibetanus mupinensis NC008753 2 | Leopardus wiedii NC028318 1           | 0,18128084 |
| Ursus thibetanus formosanus NC009331 1 | Ailurus fulgens styani NC009691 1     | 0,18128096 |
| Leopardus jacobita NC028322 1          | ICTONYX STRIATUS T299 1               | 0,18128166 |
| Puma concolor NC016470 22              | ICTONYX STRIATUS T299 1               | 0,18128173 |
| Leptailurus serval NC028316 1          | Bassariscus sumichrasti SRX1099089 1  | 0,18128209 |
| Mustela erminea T305 2                 | Arctictis binturong T605 2            | 0,18128243 |
| Neovison vison NC020641 3              | Catopuma badia NC028300 1             | 0,18128254 |
| Melursus ursinus NC009970 2            | Arctocepalus pusillus NC008417 1      | 0,18128262 |
| Prionailurus viverrinus NC028305 1     | ICTONYX STRIATUS T299 1               | 0,18128324 |
| Panthera tigris NC010642 35            | Mirounga angustirostris SRR10331586 1 | 0,18128598 |
| Lycyaon pictus NC028427 2              | Catopuma badia NC028300 1             | 0,18128787 |
| Ursus thibetanus laniger MH281753 2    | Mustela altaica NC021751 1            | 0,18128814 |
| Ursus thibetanus thibetanus NC011118 4 | Civettictis civetta GLC19 1           | 0,18128883 |
| Ursus spelaeus NC011112 8              | Arctocepalus pusillus NC008417 1      | 0,18129018 |
| Ursus arctos GU573486 5                | Neovison vison NC020641 3             | 0,18129498 |
| Ursus arctos AP012576 6                | Ommatophoca rossii AY377287etc 1      | 0,18129881 |
| Felis silvestris lybica KP202275 4     | Canis lupus familiaris NC002008 1231  | 0,18130247 |
| Pusa sibirica NC008432 2               | Cuon alpinus NC013445 3               | 0,18130386 |
| Ursus americanus JX196366 3            | Meles leucurus NC039173 4             | 0,18130517 |
| Tremarctos ornatus NC009969 2          | Martes flavigula NC012141 3           | 0,18130656 |
| Caracal caracal NC028306 1             | Canis lupus chanco NC010340 4         | 0,18130904 |
| ICTONYX STRIATUS T299 1                | Eumetopias jubatus NC004030 10        | 0,18131068 |
| Civettictis civetta NC033378 1         | Canis aureus KT448274 1               | 0,18131216 |
| Felis silvestris lybica KP202275 4     | Canis lupus chanco NC010340 4         | 0,18131317 |
| Arctotherium sp NC030174 1             | Arctocepalus townsendi NC008420 1     | 0,18131547 |
| Nasua nasua NC020647 1                 | Mustela sibirica AP017394 11          | 0,18131621 |
| Lutra sumatrana NC035810 1             | Fossa fossana D350 1                  | 0,18131669 |

|                                       |                                      |            |
|---------------------------------------|--------------------------------------|------------|
| Mellivora capensis T370 1             | Eumetopias jubatus NC004030 10       | 0,20204078 |
| Ursus arctos EU497665 29              | Mellivora capensis T370 1            | 0,20207594 |
| Mellivora capensis T370 1             | Catopuma temminckii NC027115 41      | 0,20207621 |
| Ursus arctos GU573486 5               | Mellivora capensis T370 1            | 0,20208959 |
| Nasua nasua NC020647 1                | Galidia elegans D146 1               | 0,20213209 |
| Vulpes lagopus NC026529 3             | Tapirus terrestris T358              | 0,20219526 |
| Speothos venaticus C48 2              | Nasua nasua NC020647 1               | 0,20221199 |
| Zalophus californianus NC008416 1     | Mellivora capensis T370 1            | 0,20222272 |
| Nasua nasua NC020647 1                | Canis mesomelas KT448280 1           | 0,20224939 |
| Mephitis mephitis NC020648 1          | Mellivora capensis T370 1            | 0,20228952 |
| Mellivora capensis T370 1             | Felis margarita NC028308 1           | 0,20241305 |
| Ursus thibetanus laniger MH281753 2   | Mellivora capensis T370 1            | 0,20242409 |
| Odobenus rosmarus NC004029 29         | Galidia elegans D146 1               | 0,20243077 |
| Spilogale putorius NC010497 1         | Cryptoprocta ferox GFC13 1           | 0,20245615 |
| Panthera pardus japonensis KJ866876   | Mellivora capensis T370 1            | 0,20248017 |
| Panthera pardus NC010641 5            | Mellivora capensis T370 1            | 0,20252299 |
| Mellivora capensis T370 1             | Felis nigripes NC028309 1            | 0,20254762 |
| Mellivora capensis T370 1             | Caracal caracal NC028306 1           | 0,20254865 |
| Ursus spelaeus EU327344 13            | Mellivora capensis T370 1            | 0,20256062 |
| Melursus ursinus NC009970 2           | Tapirus terrestris T358              | 0,20256156 |
| Otaria byronia OTAB 1                 | Mellivora capensis T370 1            | 0,20259994 |
| Ursus arctos pruinus MG066703 3       | Mellivora capensis T370 1            | 0,20261468 |
| Mellivora capensis T370 1             | Cryptoprocta ferox GFC13 1           | 0,20267402 |
| Prionailurus planiceps NC028312 6     | Mellivora capensis T370 1            | 0,20268184 |
| Bassaricyon neblina SRX1097850 1      | Tapirus terrestris T358              | 0,2027915  |
| Tremarctos ornatus NC009969 2         | Mellivora capensis T370 1            | 0,20280669 |
| Ursus arctos megalotis SAF 1 2        | Nasua nasua NC020647 1               | 0,20281485 |
| Odobenus rosmarus NC004029 29         | Canis anthus NC027956 2              | 0,20282707 |
| Ursus arctos AP012576 6               | Mellivora capensis T370 1            | 0,20283328 |
| Mellivora capensis T370 1             | Arctocepalus pusillus NC008417 1     | 0,20293534 |
| Ursus arctos GU573491 207             | Mellivora capensis T370 1            | 0,2029511  |
| Mellivora capensis T370 1             | Felis catus NC001700 2               | 0,20301878 |
| Salanoia concolor D378 1              | Mellivora capensis T370 1            | 0,20306881 |
| Parahyaena brunnea NC038159 15        | Mellivora capensis T370 1            | 0,20308198 |
| Cynogale bennetti KY117544 1          | Aonyx cinerea NC035814 2             | 0,20315261 |
| Prionailurus planiceps KY682741 4     | Mellivora capensis T370 1            | 0,20315333 |
| Speothos venaticus C48 2              | Tapirus terrestris T358              | 0,2032821  |
| Mellivora capensis T370 1             | Canis adustus KT448271 1             | 0,2032878  |
| Spilogale putorius NC010497 1         | Mellivora capensis T370 1            | 0,2033219  |
| Vulpes vulpes NC008434 5              | Nasua nasua NC020647 1               | 0,20334263 |
| Aonyx cinerea NC035814 2              | Tapirus terrestris T358              | 0,20335643 |
| Vulpes ferrilata NC027935 1           | Tapirus terrestris T358              | 0,20341125 |
| Ursus arctos isabellinus 1885 2       | Mellivora capensis T370 1            | 0,20342259 |
| Panthera tigris NC010642 35           | Mellivora capensis T370 1            | 0,20350003 |
| Mellivora capensis T370 1             | Arctocepalus townsendi NC008420 1    | 0,20353942 |
| Prionodon linsang ERR2391707 1        | Nasua nasua NC020647 1               | 0,20354778 |
| Neophoca cinerea NC008419 1           | Mellivora capensis T370 1            | 0,20360872 |
| Mellivora capensis T370 1             | Arctotherium sp NC030174 1           | 0,20362231 |
| Mellivora capensis T370 1             | Arctocepalus gazella BK010918 1      | 0,20381133 |
| Vulpes lagopus NC026529 3             | Nasua nasua NC020647 1               | 0,20381339 |
| Odobenus rosmarus NC004029 29         | Canis mesomelas KT448280 1           | 0,20381857 |
| Odobenus rosmarus NC004029 29         | Tapirus terrestris T358              | 0,20389692 |
| Panthera leo NERO 19                  | Mellivora capensis T370 1            | 0,20392874 |
| Mungos mungo MIMC7 1                  | Mellivora capensis T370 1            | 0,20400834 |
| Mellivora capensis T370 1             | Arctocepalus australis MG023139 1    | 0,2040786  |
| Panthera uncia KP202269 1             | Mellivora capensis T370 1            | 0,20409606 |
| Phocarcotus hookeri NC008418 1        | Mellivora capensis T370 1            | 0,20414692 |
| Mellivora capensis T370 1             | Galerella sanguinea T378 1           | 0,20415433 |
| Panthera leo spelaea KX258452 2       | Mellivora capensis T370 1            | 0,20417823 |
| Ursus americanus JX196366 3           | Mellivora capensis T370 1            | 0,20420757 |
| Mellivora capensis T370 1             | Catopuma badia NC028300 1            | 0,20423128 |
| Nasua nasua NC020647 1                | Odobenus rosmarus NC004029 29        | 0,20426704 |
| Mellivora capensis T370 1             | Arctocepalus forsteri KT693377 17    | 0,20428088 |
| Mellivora capensis T370 1             | Galidictis fasciata DM333 1          | 0,20434824 |
| Vulpes corsac NC023958 1              | Nasua nasua NC020647 1               | 0,20435296 |
| Melursus ursinus NC009970 2           | Mellivora capensis T370 1            | 0,20437674 |
| Urocyon cinereoargenteus NC026723 3   | Nasua nasua NC020647 1               | 0,20442204 |
| Mellivora capensis T370 1             | Hemigalus derbyanus MH464791 1       | 0,20452136 |
| Mellivora capensis T370 1             | Attilax paludinosus T606 1           | 0,20454814 |
| Nasua nasua NC020647 1                | Cynogale bennetti KY117544 1         | 0,2045524  |
| Panthera tigris amoyensis NC014770 2  | Mellivora capensis T370 1            | 0,20457761 |
| Vulpes ferrilata NC027935 1           | Nasua nasua NC020647 1               | 0,20462243 |
| Mellivora capensis T370 1             | Conepatus chinga NC042596 1          | 0,20469165 |
| Mungotictis decemlineata NC027828 1   | Mellivora capensis T370 1            | 0,20475245 |
| Mungos mungo/gambianus SRR77048       | Mellivora capensis T370 1            | 0,20481634 |
| Cynogale bennetti KY117544 1          | Bassaricyon neblina SRX1097850 1     | 0,20495895 |
| Speothos venaticus C48 2              | Odobenus rosmarus NC004029 29        | 0,20512755 |
| Suricata suricatta SSM10 1            | Mellivora capensis T370 1            | 0,20515364 |
| Mellivora capensis T370 1             | Arctocepalus forsteri NC004023 28    | 0,20525558 |
| Urocyon littoralis catalinae KP129018 | Nasua nasua NC020647 1               | 0,20536457 |
| Neofelis nebulosa NC008450 3          | Mellivora capensis T370 1            | 0,20541008 |
| Odobenus rosmarus NC004029 29         | Cynogale bennetti KY117544 1         | 0,20550106 |
| Mellivora capensis T370 1             | Ichneumia albicauda T603 1           | 0,20550406 |
| Mellivora capensis T370 1             | Arctodus simus NC011116 1            | 0,20557566 |
| Mellivora capensis T370 1             | Hyaena hyaena NC020669 1             | 0,20563875 |
| Mellivora capensis T370 1             | Canis latrans NC008093 7             | 0,20589773 |
| Mellivora capensis T370 1             | Galidia elegans D146 1               | 0,20603189 |
| Mellivora capensis T370 1             | Bdeogale nigripes GLC15 1            | 0,20609707 |
| Paguma larvata PDD511 2               | Mellivora capensis T370 1            | 0,2061743  |
| Mellivora capensis T370 1             | Xenogale naso C07XAR110 1            | 0,20623136 |
| Nasua nasua NC020647 1                | Tapirus terrestris T358              | 0,20630716 |
| Mellivora capensis T370 1             | Eupleres goudoti D128 1              | 0,2063646  |
| Proteles cristata T393 6              | Mellivora capensis T370 1            | 0,2065203  |
| Mellivora capensis T370 1             | Canis lupus familiaris NC002008 1231 | 0,20667845 |
| Mellivora capensis T370 1             | Urva semitorquata MH464789 1         | 0,20670201 |
| Lontra canadensis SRR10409165 1       | Tapirus terrestris T358              | 0,2070578  |
| Caracal caracal NC028306 1            | Mellivora capensis T370 1            | 0,20712605 |
| Panthera uncia NC010638 1             | Mellivora capensis T370 1            | 0,20712605 |
| Nyctereutes procyonoides NC013700 3   | Mellivora capensis T370 1            | 0,20731172 |
| Lutrogale perspicillata NC035811 1    | Cynogale bennetti KY117544 1         | 0,20732377 |
| Otocyon megalotis SAF 1 2             | Mellivora capensis T370 1            | 0,20739174 |
| Mellivora capensis T370 1             | Canis aureus KT448274 1              | 0,20752613 |
| Mellivora capensis T370 1             | Crocota crocota NC020670 3           | 0,20772958 |
| Vulpes lagopus NC026529 3             | Mellivora capensis T370 1            | 0,20784815 |

|                                        |                                        |            |
|----------------------------------------|----------------------------------------|------------|
| Ursus thibetanus mupinensis NC008753 2 | Gulo gulo NC009685 3                   | 0,18131822 |
| Mustela sibirica AP017394 11           | Fossa fossana D350 1                   | 0,18131964 |
| Mustela frenata NC020640 1             | Urocyon v. f. 1                        | 0,18132141 |
| Melogale moschata NC020644 1           | Genetta abyssinica MG489822 1          | 0,18132198 |
| Nasua nasua NC020647 1                 | Melogale moschata NC020644 1           | 0,18132387 |
| Martes martes T302 3                   | Fossa fossana D350 1                   | 0,18132453 |
| Martes pennanti NC020664 16            | Arctocephalus gazella BK010918 1       | 0,18132783 |
| Melogale moschata NC020644 1           | Arctocephalus gazella BK010918 1       | 0,18132831 |
| Meles anakuma NC009677 1               | Lynx rufus NC014456 3                  | 0,18132941 |
| Meles leucurus NC039173 4              | Felis margarita NC028308 1             | 0,18133011 |
| Ursus maritimus NC003428 31            | Arctocyon ursinus NC008415 1           | 0,18133058 |
| Viverra zibetha T609 1                 | Arctocyon collaris NC020645 1          | 0,18133157 |
| Viverricula indica NC025925 2          | Meles anakuma NC009677 1               | 0,18133168 |
| Mustela sibirica NC020637 6            | Lynx rufus NC014456 3                  | 0,18133271 |
| Mustela putorius NC020638 4            | Lynx rufus NC014456 3                  | 0,18133272 |
| Paradoxurus jerdoni MH464793 1         | Mustela sibirica AP017394 11           | 0,18133302 |
| Leopardus guigna NC028321 1            | Arctocyon collaris NC020645 1          | 0,18133412 |
| Phoca groenlandica NC008429 54         | Nyctereutes procyonoides NC013700 3    | 0,18133442 |
| Vulpes ferratilis NC027935 1           | Pusa hispida NC 008433 1               | 0,18133536 |
| Vulpes vulpes NC008434 5               | Phoca vitulina NC001325 1              | 0,18133542 |
| Ursus maritimus NC003428 31            | Meles leucurus NC039173 4              | 0,18133603 |
| Martes zibellina NC011579 39           | Felis margarita NC028308 1             | 0,18133679 |
| Martes americana NC020642 1            | Leptailurus serval NC028316 1          | 0,18133692 |
| Ursus maritimus GU573488 Svalbard      | Ailuropus fulgens styanii NC009691 1   | 0,18133815 |
| Nyctereutes procyonoides NC013700 3    | Catopuma temminckii NC027115 41        | 0,18133973 |
| Panthera tigris amoyensis NC014770 2   | Mirounga leonina NC008422 1            | 0,18133974 |
| Prionailurus bengalensis CKM45 20      | Martes americana NC020642 1            | 0,18133996 |
| Procyon lotor AB462046 3               | Felis silvestris lybica KP202275 4     | 0,18134053 |
| Puma concolor NC016470 22              | Melogale moschata NC020644 1           | 0,18134165 |
| Mustela altaica NC021751 1             | Lynx rufus NC014456 3                  | 0,18134184 |
| Zalophus wolfebaeki SRR4431565 1       | Martes pennanti NC020664 16            | 0,18134192 |
| Erignathus barbatus NC008426 1         | Crocota crocata NC020670 3             | 0,18134196 |
| Prionailurus bengalensis NC028301 12   | Martes pennanti NC020664 16            | 0,18134221 |
| Ursus arctos GU573486 5                | Meles leucurus NC039173 4              | 0,18134227 |
| Smilodon populator MF871700 1          | Meles anakuma NC009677 1               | 0,18134233 |
| Mustela nivalis T306 5                 | Civettictis civetta GLC19 1            | 0,18134246 |
| Ursus spelaeus NC011112 8              | Callorhinus ursinus NC008415 1         | 0,18134345 |
| Martes martes T302 3                   | Catopuma temminckii NC027115 41        | 0,18134351 |
| Prionailurus planiceps KY682741 4      | Arctodus simus NC011116 1              | 0,18134305 |
| Ursus thibetanus thibetanus NC011118 4 | Martes zibellina NC011579 39           | 0,18134358 |
| Mustela erminea T305 2                 | Canis mesomelas KT448280 1             | 0,18134683 |
| Taxidea taxus NC020646 1               | Odobenus rosmarus NC004029 29          | 0,18135028 |
| Genetta servalina NC024568 2           | Ailuropoda melanoleuca NC009492 5      | 0,18135154 |
| Ursus thibetanus laniger MH281753 2    | Ailuropus fulgens styanii NC009691 1   | 0,18135282 |
| Panthera pardus NC010641 5             | Canis adustus KT448271 1               | 0,18135364 |
| Neofelis nebulosa NC008450 3           | Halichoerus grypus NC001602 2          | 0,18135406 |
| Ursus spelaeus NC011112 8              | Melogale moschata NC020644 1           | 0,18135427 |
| Otaria byronia OTAB 1                  | Helarctos malayanus NC009968 2         | 0,18135506 |
| Crossarchus platycephalus C7R66 1      | Canis lupus familiaris NC002008 1231   | 0,18135516 |
| Viverra zibetha T609 1                 | Ursus thibetanus thibetanus NC011118 4 | 0,18135561 |
| Ursus thibetanus thibetanus NC011118 4 | Genetta servalina NC024568 2           | 0,18135563 |
| Ursus arctos isabellinus 1885 2        | Neovison vison NC020641 3              | 0,18135571 |
| Zalophus californianus NC008416 1      | Procyon lotor AB462046 3               | 0,18135834 |
| Phoca largha NC008430 1                | Arctictis binturong T605 2             | 0,18135847 |
| Ursus thibetanus thibetanus NC011118 4 | Leopardus pardalis NC028315 1          | 0,18135945 |
| Ursus thibetanus laniger MH281753 2    | Puma yagouaroundi NC028311 1           | 0,18136334 |
| Civettictis civetta GLC19 1            | Canis lupus familiaris NC002008 1231   | 0,18136515 |
| Martes pennanti NC020664 16            | Eumetopias jubatus NC004030 10         | 0,18136735 |
| Martes flavigula NC012141 3            | Genetta servalina NC024568 2           | 0,18136899 |
| Vulpes ferratilis NC027935 1           | Civettictis civetta NC033378 1         | 0,18137118 |
| Phoca fasciata NC008428 1              | Cuon alpinus NC013445 3                | 0,18137419 |
| Ursus americanus JX196366 3            | Arctocyon collaris NC020645 1          | 0,1813764  |
| Nasua nasua NC020647 1                 | Meles anakuma NC009677 1               | 0,18137985 |
| Prionailurus bengalensis NC028301 12   | Canis lupus chanco NC010340 4          | 0,18138285 |
| Neophoca cinerea NC008419 1            | Enhydra lutris NC009692 1              | 0,18138544 |
| Martes americana NC020642 1            | Arctocephalus townsendi NC008420 1     | 0,18138738 |
| Viverra tangalunga MH464792 1          | Fossa fossana D350 1                   | 0,18138807 |
| Fossa fossana D350 1                   | Arctocephalus australis MG021319 1     | 0,18138918 |
| Salanoia concolor D378 1               | Meles meles T303 3                     | 0,18139084 |
| Mustela erminea T305 2                 | Urocyon v. f. 1                        | 0,18139085 |
| Enhydra lutris NC009692 1              | Canis adustus KT448271 1               | 0,1813949  |
| Ursus thibetanus formosanus NC009331 1 | Gulo gulo NC009685 3                   | 0,18139493 |
| Meles leucurus NC039173 4              | Felis nigripes NC028309 1              | 0,18139727 |
| Martes martes T302 3                   | Canis latrans NC008093 7               | 0,18140005 |
| Paradoxurus jerdoni MH464793 1         | Mustela putorius NC020638 4            | 0,18140031 |
| Mustela sibirica AP017394 11           | Genetta servalina NC024568 2           | 0,18140051 |
| Mustela itatsi NC034330 19             | Leopardus pardalis T262 1              | 0,18140058 |
| Ursus maritimus GU573488 Svalbard      | Melogale moschata KP726273 1           | 0,18140088 |
| Ursus thibetanus mupinensis NC008753 2 | Fossa fossana D350 1                   | 0,18140125 |
| Tremarctos ornatus NC009969 2          | Lynx pardinus NC028319 161             | 0,18140145 |
| Monachus schauinslandi NC008421 1      | Bdeogale nigripes GLC15 1              | 0,18140148 |
| Mustela putorius NC020638 4            | Felis margarita NC028308 1             | 0,18140155 |
| Vulpes vulpes NC008434 5               | Leptailurus serval NC028316 1          | 0,18140335 |
| Mustela sibirica NC020637 6            | Leopardus geoffroyi NC028320 1         | 0,18140364 |
| Leopardus pardalis T262 1              | Canis latrans NC008093 7               | 0,18140437 |
| Ursus arctos GU573491 207              | Mustela sibirica NC020637 6            | 0,18140461 |
| Nasua nasua NC020647 1                 | Lobodon carcinophaga NC008423 1        | 0,18140557 |
| Ursus thibetanus mupinensis NC008753 2 | Arctocephalus pusillus NC008417 1      | 0,18140668 |
| Ursus arctos pruinosus MG066703 3      | Melogale moschata KP726273 1           | 0,18140709 |
| Panthera tigris NC010642 35            | Mirounga leonina NC008422 1            | 0,18140726 |
| Pusa caspica NC008431 1                | Proteles cristata T393 6               | 0,18140756 |
| Prionailurus planiceps KY682741 4      | Martes martes T302 3                   | 0,18140869 |
| Felis silvestris lybica KP202275 4     | Aonyx cinerea NC0035814 2              | 0,18140897 |
| Monachus monachus NC0044972 5          | Cuon alpinus NC013445 3                | 0,18140909 |
| Mustela altaica NC021751 1             | Leopardus wiedii NC028318 1            | 0,18140933 |
| Cystophora cristata NC008427 1         | Canis mesomelas KT448280 1             | 0,18141103 |
| Prionailurus planiceps NC028312 6      | Arctodus simus NC011116 1              | 0,18141244 |
| Meles leucurus NC039173 4              | Arctictis binturong T605 2             | 0,18141247 |
| Mustela altaica NC021751 1             | Leopardus guigna NC028321 1            | 0,18141288 |
| Neovison vison NC020641 3              | Felis nigripes NC028309 1              | 0,18141317 |
| Prionailurus bengalensis CKM45 20      | Martes pennanti NC020664 16            | 0,18141337 |
| Martes foina NC020643 1                | Catopuma temminckii NC027115 41        | 0,18141524 |
| Phocarcos hookeri NC008418 1           | Helarctos malayanus NC009968 2         | 0,18141557 |

|                                       |                                    |            |
|---------------------------------------|------------------------------------|------------|
| Mellivora capensis T370 1             | Canis lupus chanco NC010340 4      | 0,20786706 |
| Mellivora capensis T370 1             | Urocyon v. f. 1                    | 0,20791475 |
| Lutrogale perspicillata NC035811 1    | Tapirus terrestris T358            | 0,20813854 |
| Mellivora capensis T370 1             | Ailuropoda melanoleuca NC009492 5  | 0,20814802 |
| Mellivora capensis T370 1             | Urocyon v. f. 1                    | 0,20816867 |
| Mellivora capensis T370 1             | Cynictis penicillata T375 1        | 0,20818415 |
| Mellivora capensis T370 1             | Chrotogale owstoni T607 1          | 0,20819071 |
| Prionodon pardicolor NC024569 2       | Mellivora capensis T370 1          | 0,20840663 |
| Mellivora capensis T370 1             | Canis mesomelas KT448280 1         | 0,20852031 |
| Mellivora capensis T370 1             | Helogale parvula SRR7637809 1      | 0,20858723 |
| Mellivora capensis T370 1             | Arctictis binturong T605 2         | 0,20861408 |
| Mellivora capensis T370 1             | Canis anthus NC027956 2            | 0,20892796 |
| Mellivora capensis T370 1             | Urocyon v. f. 1                    | 0,20899194 |
| Paradoxurus jerdoni MH464793 1        | Mellivora capensis T370 1          | 0,20920435 |
| Vulpes zerda KJ603240 1               | Mellivora capensis T370 1          | 0,20926316 |
| Vulpes vulpes NC008434 5              | Mellivora capensis T370 1          | 0,20932892 |
| Mellivora capensis T370 1             | Lycalopex schauinslandi KT448284 1 | 0,21012127 |
| Mellivora capensis T370 1             | Lycan pictus NC028427 2            | 0,21048811 |
| Odobenus rosmarus NC004029 29         | Mellivora capensis T370 1          | 0,21051067 |
| Mellivora capensis T370 1             | Chrysoyon brachyurus NC024172 1    | 0,21069489 |
| Paradoxurus hermaphroditus NMLC 1     | Mellivora capensis T370 1          | 0,21102241 |
| Mellivora capensis T370 1             | Cuon alpinus NC013445 3            | 0,21166278 |
| Vulpes ferratilis NC027935 1          | Mellivora capensis T370 1          | 0,21182057 |
| Prionodon linsang ERR2391707 1        | Mellivora capensis T370 1          | 0,21182209 |
| Mellivora capensis T370 1             | Diplogale hosei MH464790 1         | 0,21193735 |
| Paradoxurus hermaphroditus NC03959    | Mellivora capensis T370 1          | 0,21230215 |
| Vulpes corsac NC023958 1              | Mellivora capensis T370 1          | 0,21283016 |
| Urocyon cinereoargenteus NC026723 2   | Mellivora capensis T370 1          | 0,21290109 |
| Urocyon littoralis catalinae KP129018 | Mellivora capensis T370 1          | 0,21317038 |
| Speothos venaticus C48 2              | Mellivora capensis T370 1          | 0,21351776 |
| Homotherium latidens MF871702 3       | Phataginus tricuspidis NC026780    | 0,21589616 |
| Mellivora capensis T370 1             | Cynogale bennetti KY117544 1       | 0,21593523 |
| Mellivora capensis T370 1             | Tapirus terrestris T358            | 0,21653745 |
| Hemigalus derbyanus MH464791 1        | Phataginus tricuspidis NC026780    | 0,21846072 |
| Canis adustus KT448271 1              | Phataginus tricuspidis NC026780    | 0,2208854  |
| Phataginus tricuspidis NC026780       | Tapirus terrestris T358            | 0,22487813 |
| Puma yagouaroundi NC028311 1          | Phataginus tricuspidis NC026780    | 0,22524206 |
| Puma concolor NC016470 22             | Phataginus tricuspidis NC026780    | 0,22557169 |
| Catopuma badia NC028300 1             | Phataginus tricuspidis NC026780    | 0,22578776 |
| Arctictis binturong T605 2            | Phataginus tricuspidis NC026780    | 0,22595443 |
| Leptailurus serval NC028316 1         | Phataginus tricuspidis NC026780    | 0,22631142 |
| Prionailurus bengalensis NC028301 12  | Phataginus tricuspidis NC026780    | 0,22637379 |
| Prionailurus bengalensis CKM45 20     | Phataginus tricuspidis NC026780    | 0,22657189 |
| Viverricula indica KX891745 1         | Phataginus tricuspidis NC026780    | 0,22662733 |
| Hydrurga leptonyx NC008425 1          | Phataginus tricuspidis NC026780    | 0,22670805 |
| Viverricula indica KX891751 1         | Phataginus tricuspidis NC026780    | 0,22697055 |
| Profelis aurata NC028299 1            | Phataginus tricuspidis NC026780    | 0,22705185 |
| Prionailurus viverrinus NC028305 1    | Phataginus tricuspidis NC026780    | 0,22711936 |
| Monachus monachus NC0044972 5         | Phataginus tricuspidis NC026780    | 0,22713321 |
| Genetta servalina NC024568 2          | Phataginus tricuspidis NC026780    | 0,22730303 |
| Acinonyx jubatus NC005212 3           | Phataginus tricuspidis NC026780    | 0,22747581 |
| Viverra zibetha T609 1                | Phataginus tricuspidis NC026780    | 0,22750384 |
| Mungos mungo MMMC 7                   | Phataginus tricuspidis NC026780    | 0,22771791 |
| Leopardus tigrinus NC028317 1         | Phataginus tricuspidis NC026780    | 0,22773673 |
| Prionailurus rubiginosus NC028304 2   | Phataginus tricuspidis NC026780    | 0,22784302 |
| Paradoxurus jerdoni MH464793 1        | Phataginus tricuspidis NC026780    | 0,22804511 |
| Viverricula indica NC025296 2         | Phataginus tricuspidis NC026780    | 0,22804868 |
| Paradoxurus hermaphroditus NMLC 1     | Phataginus tricuspidis NC026780    | 0,22811289 |
| Lobodon carcinophaga NC008423 1       | Phataginus tricuspidis NC026780    | 0,22812387 |
| Caracal caracal NC028306 1            | Phataginus tricuspidis NC026780    | 0,2281992  |
| Civettictis civetta GLC19 1           | Phataginus tricuspidis NC026780    | 0,22824191 |
| Smilodon populator MF871700 1         | Phataginus tricuspidis NC026780    | 0,22826028 |
| Catopuma temminckii NC027115 41       | Phataginus tricuspidis NC026780    | 0,22828029 |
| Diplogale hosei MH464790 1            | Phataginus tricuspidis NC026780    | 0,22847393 |
| Prionailurus planiceps KY682741 4     | Phataginus tricuspidis NC026780    | 0,22852986 |
| Leopardus geoffroyi NC028320 1        | Phataginus tricuspidis NC026780    | 0,22862007 |
| Paguma larvata PDD5 11 2              | Phataginus tricuspidis NC026780    | 0,22872204 |
| Civettictis civetta NC033378 1        | Phataginus tricuspidis NC026780    | 0,22883071 |
| Erignathus barbatus NC008426 1        | Phataginus tricuspidis NC026780    | 0,22891891 |
| Nandinia binotata NC024567 1          | Phataginus tricuspidis NC026780    | 0,22892016 |
| Prionodon linsang ERR2391707 1        | Phataginus tricuspidis NC026780    | 0,22896336 |
| Otocolobus manul NC028323 1           | Phataginus tricuspidis NC026780    | 0,22900976 |
| Lynx lynx NC027083 4                  | Phataginus tricuspidis NC026780    | 0,22927967 |
| Prionodon pardicolor NC024569 2       | Phataginus tricuspidis NC026780    | 0,2293327  |
| Cystophora cristata NC008427 1        | Phataginus tricuspidis NC026780    | 0,22951427 |
| Felis chaus NC028307 1                | Phataginus tricuspidis NC026780    | 0,22955212 |
| Felis margarita NC028308 1            | Phataginus tricuspidis NC026780    | 0,22969061 |
| Lynx canadensis NC028313 1            | Phataginus tricuspidis NC026780    | 0,22969319 |
| Conepatus chinga NC042596 1           | Phataginus tricuspidis NC026780    | 0,22972238 |
| Leptonyx chosrovii NC008424 1         | Phataginus tricuspidis NC026780    | 0,22973184 |
| Cynogale bennetti KY117544 1          | Phataginus tricuspidis NC026780    | 0,22973245 |
| Leopardus pardalis NC028315 1         | Phataginus tricuspidis NC026780    | 0,22975038 |
| Genetta genetta T297 1                | Phataginus tricuspidis NC026780    | 0,22979817 |
| Crossarchus platycephalus C7R66 1     | Phataginus tricuspidis NC026780    | 0,22987133 |
| Lynx pardinus NC028319 161            | Phataginus tricuspidis NC026780    | 0,22988592 |
| Leopardus colocolo NC028314 1         | Phataginus tricuspidis NC026780    | 0,22998403 |
| Prionailurus planiceps NC028312 6     | Phataginus tricuspidis NC026780    | 0,23001347 |
| Felis silvestris lybica KP202275 4    | Phataginus tricuspidis NC026780    | 0,23009634 |
| Felis nigripes NC028309 1             | Phataginus tricuspidis NC026780    | 0,23015328 |
| Paradoxurus hermaphroditus NC03959    | Phataginus tricuspidis NC026780    | 0,23040506 |
| Leopardus pardalis T262 1             | Phataginus tricuspidis NC026780    | 0,23049231 |
| Urocyon v. f. 1                       | Phataginus tricuspidis NC026780    | 0,23052634 |
| Phoca fasciata NC008428 1             | Phataginus tricuspidis NC026780    | 0,23060836 |
| Monachus schauinslandi NC008421 1     | Phataginus tricuspidis NC026780    | 0,23070791 |
| Pusa hispida NC 008433 1              | Phataginus tricuspidis NC026780    | 0,23073904 |
| Chrotogale owstoni T607 1             | Phataginus tricuspidis NC026780    | 0,23086578 |
| Felis catus NC001700 2                | Phataginus tricuspidis NC026780    | 0,23104022 |
| Leopardus guigna NC028321 1           | Phataginus tricuspidis NC026780    | 0,23104829 |
| Leopardus wiedii NC028318 1           | Phataginus tricuspidis NC026780    | 0,23116595 |
| Cynictis penicillata T375 1           | Phataginus tricuspidis NC026780    | 0,23135829 |
| Mirounga angustirostris SRR10331568   | Phataginus tricuspidis NC026780    | 0,23151457 |
| Fossa fossana D350 1                  | Phataginus tricuspidis NC026780    | 0,2316113  |
| Arctocyon collaris NC020645 1         | Phataginus tricuspidis NC026780    | 0,23163065 |

|                                        |                                      |            |
|----------------------------------------|--------------------------------------|------------|
| Martes foina NC020643 1                | Caracal caracal NC028306 1           | 0,18141642 |
| Martes flavigula NC012141 3            | Genetta abyssinica MG489822 1        | 0,18141803 |
| Ursus spelaeus EU327344 13             | Arctocephalus gazella BK010918 1     | 0,18141949 |
| Ursus spelaeus EU327344 13             | Mustela putorius NC020638 4          | 0,18142134 |
| Leopardus wiedii NC028318 1            | Chrysocyon brachyurus NC024172 1     | 0,18142685 |
| Mustela itatsi NC034330 19             | Canis lupus familiaris NC002008 1231 | 0,18142813 |
| Ursus spelaeus EU327344 13             | Martes foina NC020643 1              | 0,18142913 |
| Vulpes lagopus NC026529 3              | Civettictis civetta NC033378 1       | 0,18143375 |
| Chrysocyon brachyurus NC024172 1       | Arctictis binturong T605 2           | 0,18143468 |
| Martes zibellina NC011579 39           | Civettictis civetta NC033378 1       | 0,18143924 |
| Prionailurus bengalensis NC028301 12   | Gulo gulo NC009685 3                 | 0,1814414  |
| Martes flavigula NC012141 3            | Leopardus pardalis T262 1            | 0,18144384 |
| Nasua nasua NC020647 1                 | Mustela sibirica NC020637 6          | 0,18145093 |
| Nasua nasua NC020647 1                 | Melogale moschata KP726273 1         | 0,18145235 |
| Cuon alpinus NC013445 3                | Catopuma badia NC028300 1            | 0,18145248 |
| Phocarcotus hookeri NC008418 1         | Arctotherium sp NC030174 1           | 0,18145405 |
| Salanoia concolor D378 1               | Melogale moschata KP726273 1         | 0,18145777 |
| Zalophus californianus NC008416 1      | Canis adustus KT448271 1             | 0,18145883 |
| Otocolobus manul NC028323 1            | Enhydra lutris NC009692 1            | 0,18146309 |
| Meles leucurus NC039173 4              | Felis catus NC001700 2               | 0,18146446 |
| Ursus thibetanus mupinensis NC008753 2 | Martes melampus NC009678 1           | 0,181465   |
| Meles meles T303 3                     | Felis chaus NC028307 1               | 0,18146569 |
| Profelis aurata NC028299 1             | Mustela frenata NC020640 1           | 0,18146624 |
| Mustela kathiah NC023210 1             | Lynx pardinus NC028319 161           | 0,18146639 |
| Lynx pardinus NC028319 161             | Canis aureus KT448274 1              | 0,18146664 |
| Otaria byronia OTAB 1                  | Melogale moschata NC020644 1         | 0,18146695 |
| Prionailurus planiceps NC028312 6      | Mustela sibirica AP017394 11         | 0,18146826 |
| Puma concolor NC016470 22              | Mustela putorius NC020638 4          | 0,18146831 |
| Neophoca cinerea NC008419 1            | Martes foina NC020643 1              | 0,18146847 |
| Puma concolor NC016470 22              | Mustela itatsi NC034330 19           | 0,18146849 |
| Paradoxurus hermaphroditus NLNC 1      | Mustela itatsi NC034330 19           | 0,18146861 |
| Neophoca cinerea NC008419 1            | Mustela altaica NC021751 1           | 0,18146862 |
| Paradoxurus hermaphroditus NC039591 1  | Mustela kathiah NC023210 1           | 0,18146886 |
| Smilodon populator MF871700 1          | Canis lupus chanco NC010340 4        | 0,18146886 |
| Vulpes lagopus NC026529 3              | Viverricula indica NC025296 2        | 0,18146928 |
| Prionailurus viverrinus NC028305 1     | Mustela putorius NC020638 4          | 0,18146951 |
| Meles anakuma NC009677 1               | Arctodus simus NC011116 1            | 0,18147011 |
| Mustela sibirica NC020637 6            | Catopuma badia NC028300 1            | 0,18147044 |
| Speothos venaticus C48 2               | Mirounga leonina NC008422 1          | 0,18147096 |
| Vulpes vulpes NC008434 5               | Prionailurus bengalensis NC028301 12 | 0,18147099 |
| Mustela nigripes NC024942 1            | Leopardus guigna NC028321 1          | 0,18147114 |
| Viverra tangalunga MH464792 1          | Leopardus guigna NC028321 1          | 0,18147114 |
| Mustela itatsi NC034330 19             | Catopuma temminckii NC027115 41      | 0,18147127 |
| Phoca vitulina NC001325 1              | Nyctereutes procyonoides NC013700 3  | 0,18147226 |
| Prionailurus bengalensis KCM45 20      | Mustela eversmannii NC028013 1       | 0,18147287 |
| Viverricula indica NC025296 2          | Arctotherium sp NC030174 1           | 0,18147418 |
| Ursus maritimus GU573488 Svalbard      | Arctocephalus pusillus NC008417 1    | 0,18147425 |
| Procyon lotor AB462046 3               | Paguma larvata PDD511 2              | 0,18147431 |
| Pusa caspica NC008431 1                | Priodon pardicolor NC024569 2        | 0,18147437 |
| Pusa caspica NC008431 1                | Diplogale hoesi MH464790 1           | 0,18147472 |
| Procyon lotor AB462049 4               | Prionailurus rubiginosus NC028304 2  | 0,18147555 |
| Genetta genetta T297 1                 | Arctodus simus NC011116 1            | 0,18147792 |
| Leopardus pardalis T262 1              | Aonyx cinerea NC035814 2             | 0,1814782  |
| Enhydra lutris NC009692 1              | Acinonyx jubatus NC005212 3          | 0,18147932 |
| Pusa sibirica NC008432 2               | Canis mesomelas KT448280 1           | 0,18147965 |
| Homotherium latidens MF871702 3        | Canis mesomelas KT448280 1           | 0,18148139 |
| Ommatophoca rossii AY377287etc 1       | Canis aureus KT448274 1              | 0,18148184 |
| Ursus thibetanus laniger MH281753 2    | Arctocephalus forsteri KT693377 17   | 0,18148313 |
| Leopardus guigna NC028321 1            | Arctodus simus NC011116 1            | 0,18148386 |
| Mungotictis decemlineata NC027828 1    | Canis adustus KT448271 1             | 0,18148419 |
| Zalophus wollebaeki SRR4431565 1       | Ictonyx striatus T299 1              | 0,18148564 |
| Vulpes vulpes NC008434 5               | Acinonyx jubatus NC005212 3          | 0,18148582 |
| Martes zibellina NC011579 39           | Acinonyx jubatus NC005212 3          | 0,18148778 |
| Meles anakuma NC009677 1               | Eumetopias jubatus NC004030 10       | 0,1814907  |
| Ursus thibetanus formosanus NC009331 1 | Leopardus pardalis T262 1            | 0,18149248 |
| Panthera tigris NC010642 35            | Canis adustus KT448271 1             | 0,18149295 |
| Ursus thibetanus thibetanus NC011118 4 | Leopardus wiedii NC028318 1          | 0,18149441 |
| Viverricula indica NC025296 2          | Martes flavigula NC012141 3          | 0,18150273 |
| Spilogale putorius NC010497 1          | Martes americana NC020642 1          | 0,18150727 |
| Zalophus wollebaeki SRR4431565 1       | Ursus americanus JX196366 3          | 0,18151204 |
| Parahyaena brunnea NC038159 15         | Monachus monachus NC044972 5         | 0,18151303 |
| Lynx rufus NC014456 3                  | Eumetopias jubatus NC004030 10       | 0,18151498 |
| Mustela nivalis T306 5                 | Civettictis civetta NC033378 1       | 0,18151565 |
| Martes flavigula NC012141 3            | Canis aureus KT448274 1              | 0,18151763 |
| Nandinia binotata NC024567 1           | Arctocephalus townsendi NC008420 1   | 0,18152186 |
| Salanoia concolor D378 1               | Martes melampus NC009678 1           | 0,18152219 |
| Tremarctos ornatus NC009969 2          | Lutra lutra NC011358 9               | 0,18152243 |
| Mustela eversmannii NC028013 1         | Conepatus chinga NC042596 1          | 0,18152259 |
| Tremarctos ornatus NC009969 2          | Arctocephalus forsteri KT693377 17   | 0,18152502 |
| Vulpes ferrillata NC027935 1           | Cystophora cristata NC008427 1       | 0,18152513 |
| Viverricula indica NC025296 2          | Lutra lutra LC050126 1               | 0,18152633 |
| Mustela nivalis T306 5                 | Callorhinus ursinus NC008415 1       | 0,18152907 |
| Helarctos malayanus NC009968 2         | Gulo gulo NC009685 3                 | 0,18153112 |
| Prionailurus rubiginosus NC028304 2    | Meles anakuma NC009677 1             | 0,18153222 |
| Ursus maritimus GU573488 Svalbard      | Callorhinus ursinus NC008415 1       | 0,18153255 |
| Meles leucurus NC039173 4              | Caracal caracal NC028306 1           | 0,18153274 |
| Viverra zibetha T609 1                 | Martes zibellina NC011579 39         | 0,18153282 |
| Paradoxurus hermaphroditus NC039591 1  | Cystophora cristata NC008427 1       | 0,18153323 |
| Pusa hispida NC 008433 1               | Priodonotus linsang ERR2391707 1     | 0,18153334 |
| Lynx rufus NC014456 3                  | Callorhinus ursinus NC008415 1       | 0,18153366 |
| Martes zibellina NC011579 39           | Civettictis civetta GCL19 1          | 0,18153366 |
| Paradoxurus hermaphroditus NC039591 1  | Meles meles T303 3                   | 0,18153369 |
| Vulpes ferrillata NC027935 1           | Phoca fasciata NC008428 1            | 0,18153377 |
| Vulpes lagopus NC026529 3              | Civettictis civetta GCL19 1          | 0,18153416 |
| Prionailurus planiceps NC028312 6      | Martes melampus NC009678 1           | 0,1815342  |
| Prionailurus bengalensis NC028301 12   | Ailuurus fulgens NC011124 1          | 0,18153459 |
| Martes melampus NC009678 1             | Leptailurus serval NC028316 1        | 0,1815349  |
| Martes melampus NC009678 1             | Leopardus jacobita NC028322 1        | 0,18153504 |
| Tremarctos ornatus NC009969 2          | Lynx lynx NC027083 4                 | 0,18153533 |
| Ursus maritimus NC003428 31            | Melogale moschata KP726273 1         | 0,18153554 |
| Prionailurus planiceps KY682741 4      | Mustela itatsi NC034330 19           | 0,18153591 |
| Tremarctos ornatus NC009969 2          | Prionailurus rubiginosus NC028304 2  | 0,18153685 |
| Vulpes vulpes NC008434 5               | Leopardus pardalis NC028315 1        | 0,18153739 |

|                                      |                               |            |
|--------------------------------------|-------------------------------|------------|
| Neovison vison NC020641 3            | Phataginus tricuspis NC026780 | 0,23169054 |
| Phoca largha NC008430 1              | Phataginus tricuspis NC026780 | 0,23169094 |
| Leopardus jacobita NC028322 1        | Phataginus tricuspis NC026780 | 0,2317052  |
| Lynx rufus NC014456 3                | Phataginus tricuspis NC026780 | 0,23178078 |
| Mirounga leonina NC008422 1          | Phataginus tricuspis NC026780 | 0,23182197 |
| Ura javanica/auripunctata NC006835   | Phataginus tricuspis NC026780 | 0,23185465 |
| Pardofelis marmorata NLN3 2          | Phataginus tricuspis NC026780 | 0,23191461 |
| Ura brachyura KY117547 1             | Phataginus tricuspis NC026780 | 0,23194511 |
| Panthera leo NERO 19                 | Phataginus tricuspis NC026780 | 0,2321237  |
| Phoca groenlandica NC008429 54       | Phataginus tricuspis NC026780 | 0,23215741 |
| Pusa caspica NC008431 1              | Phataginus tricuspis NC026780 | 0,23254527 |
| Mungos mungo/gambianus SRR77048      | Phataginus tricuspis NC026780 | 0,23256481 |
| Panthera pardus japonensis JK866876  | Phataginus tricuspis NC026780 | 0,23269585 |
| Meles leucurus NC039173 4            | Phataginus tricuspis NC026780 | 0,23282832 |
| Genetta abyssinica MG489822 1        | Phataginus tricuspis NC026780 | 0,23289323 |
| Pusa sibirica NC008432 2             | Phataginus tricuspis NC026780 | 0,23294963 |
| Mephitis mephitis NC020648 1         | Phataginus tricuspis NC026780 | 0,23297364 |
| Panthera onca NC022842 1             | Phataginus tricuspis NC026780 | 0,23312454 |
| Mustela putorius NC020638 4          | Phataginus tricuspis NC026780 | 0,23329078 |
| Helogale parvula SRR7637809 1        | Phataginus tricuspis NC026780 | 0,23329754 |
| Arctocephalus pusillus NC008417 1    | Phataginus tricuspis NC026780 | 0,23330015 |
| Panthera onca KP202264 2             | Phataginus tricuspis NC026780 | 0,23337896 |
| Panthera leo spelaea KX258452 2      | Phataginus tricuspis NC026780 | 0,23339835 |
| Phoca vitulina NC001325 1            | Phataginus tricuspis NC026780 | 0,23344192 |
| Mustela sibirica AP017394 11         | Phataginus tricuspis NC026780 | 0,23349933 |
| Panthera uncia KP202269 1            | Phataginus tricuspis NC026780 | 0,23352221 |
| Meles meles T303 3                   | Phataginus tricuspis NC026780 | 0,23364335 |
| Panthera pardus NC010641 5           | Phataginus tricuspis NC026780 | 0,23369081 |
| Meles anakuma NC009677 1             | Phataginus tricuspis NC026780 | 0,23384666 |
| Suricata suricatta SSM10 1           | Phataginus tricuspis NC026780 | 0,23389666 |
| Mustela nigripes NC024942 1          | Phataginus tricuspis NC026780 | 0,23390527 |
| Taxidea taxus NC020646 1             | Phataginus tricuspis NC026780 | 0,23404311 |
| Galerella sanguinea T378 1           | Phataginus tricuspis NC026780 | 0,23419622 |
| Ura semitorquata MH464789 1          | Phataginus tricuspis NC026780 | 0,23425217 |
| Callorhinus ursinus NC008415 1       | Phataginus tricuspis NC026780 | 0,23430745 |
| Mustela eversmannii NC028013 1       | Phataginus tricuspis NC026780 | 0,23436806 |
| Mustela kathiah NC023210 1           | Phataginus tricuspis NC026780 | 0,23437041 |
| Ailuurus fulgens NC011124 1          | Phataginus tricuspis NC026780 | 0,23438202 |
| Panthera tigris amoyensis NC014770 2 | Phataginus tricuspis NC026780 | 0,23446015 |
| Mustela frenata NC020640 1           | Phataginus tricuspis NC026780 | 0,23450702 |
| Ailuurus fulgens styani NC009691 1   | Phataginus tricuspis NC026780 | 0,23451717 |
| Panthera uncia NC010638 1            | Phataginus tricuspis NC026780 | 0,23459272 |
| Atilax paludinosus T606 1            | Phataginus tricuspis NC026780 | 0,23459801 |
| Mustela erminea T305 2               | Phataginus tricuspis NC026780 | 0,23478611 |
| Ichneumia albicauda T603 1           | Phataginus tricuspis NC026780 | 0,23480691 |
| Mustela sibirica NC020637 6          | Phataginus tricuspis NC026780 | 0,23491561 |
| Halichoerus grypus NC001602 2        | Phataginus tricuspis NC026780 | 0,23497161 |
| Poecilogale albinucha T602 1         | Phataginus tricuspis NC026780 | 0,23498987 |
| Canis latrans NC008093 7             | Phataginus tricuspis NC026780 | 0,23532021 |
| Spilogale putorius NC010497 1        | Phataginus tricuspis NC026780 | 0,23535977 |
| Viverra tangalunga MH464792 1        | Phataginus tricuspis NC026780 | 0,23539075 |
| Ommatophoca rossii AY377287etc 1     | Phataginus tricuspis NC026780 | 0,23542574 |
| Canis aureus KT448274 1              | Phataginus tricuspis NC026780 | 0,23552668 |
| Xengalae naso CO7XAR110 1            | Phataginus tricuspis NC026780 | 0,23566486 |
| Panthera tigris NC010642 35          | Phataginus tricuspis NC026780 | 0,23567367 |
| Canis lupus familiaris NC002008 1231 | Phataginus tricuspis NC026780 | 0,23570728 |
| Bdeogale nigripes GCL15 1            | Phataginus tricuspis NC026780 | 0,23585761 |
| Chrysocyon brachyurus NC024172 1     | Phataginus tricuspis NC026780 | 0,23595589 |
| Zalophus californianus NC008416 1    | Phataginus tricuspis NC026780 | 0,23609482 |
| Lycopus pictus NC028427 2            | Phataginus tricuspis NC026780 | 0,23616007 |
| Mustela itatsi NC034330 19           | Phataginus tricuspis NC026780 | 0,23633914 |
| Canis lupus chanco NC010340 4        | Phataginus tricuspis NC026780 | 0,23652382 |
| Zalophus wollebaeki SRR4431565 1     | Phataginus tricuspis NC026780 | 0,23695782 |
| Salanoia concolor D378 1             | Phataginus tricuspis NC026780 | 0,23703909 |
| Arctocephalus townsendi NC008420 1   | Phataginus tricuspis NC026780 | 0,23706768 |
| Enhydra lutris NC009692 1            | Phataginus tricuspis NC026780 | 0,23707823 |
| Ailuropoda melanoleuca NC009492 5    | Phataginus tricuspis NC026780 | 0,23714823 |
| Galidictis fasciata DM333 1          | Phataginus tricuspis NC026780 | 0,23758119 |
| Cuon alpinus NC013445 3              | Phataginus tricuspis NC026780 | 0,23760675 |
| Canis lupus NC027956 2               | Phataginus tricuspis NC026780 | 0,23775092 |
| Ursus spelaeus NC011112 8            | Phataginus tricuspis NC026780 | 0,23778547 |
| Ursus spelaeus EU327344 13           | Phataginus tricuspis NC026780 | 0,23784611 |
| Hyaina hyaina NC020669 1             | Phataginus tricuspis NC026780 | 0,23787299 |
| Eumetopias jubatus NC004030 10       | Phataginus tricuspis NC026780 | 0,23788528 |
| Arctocephalus gazella BK010918 1     | Phataginus tricuspis NC026780 | 0,23799318 |
| Neofelis nebulosa NC008450 3         | Phataginus tricuspis NC026780 | 0,23806116 |
| Mungotictis decemlineata NC027828 1  | Phataginus tricuspis NC026780 | 0,23811679 |
| Mustela altaica NC021751 1           | Phataginus tricuspis NC026780 | 0,23814917 |
| Neophoca cinerea NC008419 1          | Phataginus tricuspis NC026780 | 0,23826796 |
| Lycalopex schureae KT448284 1        | Phataginus tricuspis NC026780 | 0,23833352 |
| Bassariscus sumichrasti SRX1099089   | Phataginus tricuspis NC026780 | 0,23836312 |
| Nyctereutes procyonoides NC013700 3  | Phataginus tricuspis NC026780 | 0,23840371 |
| Arctocephalus forsteri NC004023 28   | Phataginus tricuspis NC026780 | 0,23860008 |
| Otaria byronia OTAB 1                | Phataginus tricuspis NC026780 | 0,2386864  |
| Arctodus simus NC011116 1            | Phataginus tricuspis NC026780 | 0,23876552 |
| Helarctos malayanus NC009968 2       | Phataginus tricuspis NC026780 | 0,2387846  |
| Arctocephalus australis MG023139 1   | Phataginus tricuspis NC026780 | 0,23879835 |
| Canis mesomelas KT448280 1           | Phataginus tricuspis NC026780 | 0,23881981 |
| Arctocephalus forsteri KT693377 17   | Phataginus tricuspis NC026780 | 0,23886606 |
| Ictonyx striatus T299 1              | Phataginus tricuspis NC026780 | 0,23891455 |
| Martes foina NC020643 1              | Phataginus tricuspis NC026780 | 0,23891528 |
| Proteles cristata T393 6             | Phataginus tricuspis NC026780 | 0,23909795 |
| Ursus thibetanus mupinensis NC008753 | Phataginus tricuspis NC026780 | 0,23931569 |
| Martes melampus NC009678 1           | Phataginus tricuspis NC026780 | 0,23942886 |
| Mustela nivalis T306 5               | Phataginus tricuspis NC026780 | 0,23943609 |
| Galictis vittata T412 1              | Phataginus tricuspis NC026780 | 0,23952359 |
| Eupleres goudoti D128 1              | Phataginus tricuspis NC026780 | 0,23956028 |
| Martes flavigula NC012141 3          | Phataginus tricuspis NC026780 | 0,23970325 |
| Ursus thibetanus laniger MH281753 2  | Phataginus tricuspis NC026780 | 0,23973209 |
| Parahyaena brunnea NC038159 15       | Phataginus tricuspis NC026780 | 0,23976971 |
| Lutra lutra LC050126 1               | Phataginus tricuspis NC026780 | 0,23977236 |
| Ursus thibetanus thibetanus NC011118 | Phataginus tricuspis NC026780 | 0,23984703 |
| Ursus maritimus GU573488 Svalbard    | Phataginus tricuspis NC026780 | 0,23990734 |

|                                          |                                        |            |
|------------------------------------------|----------------------------------------|------------|
| Paguma larvata PDD511 2                  | Canis latrans NCO08093 7               | 0,18153793 |
| Paradoxurus jerdoni MH464793 1           | Canis anthus NCO27956 2                | 0,18153864 |
| Vulpes corsac NCO23958 1                 | Monachus schauinslandi NCO08421 1      | 0,18153967 |
| Viverra zibetha T609 1                   | Mustela nivalis T306 5                 | 0,18154421 |
| Panthera uncia KP202269 1                | Mirounga angustirostris SRR10331586 1  | 0,18154585 |
| Ursus thibetanus laniger MH281753 2      | Enhydra lutris NCO09692 1              | 0,18154687 |
| Poecilogale albinucha T602 1             | Leopardus pardalis NCO28315 1          | 0,18154688 |
| Viverra zibetha T609 1                   | Ursus thibetanus mupinensis NCO08753 2 | 0,18154718 |
| Prionailurus viverrinus NCO28305 1       | Arctodus simus NCO11116 1              | 0,18154784 |
| Pusa sibirica NCO08432 2                 | Arctictis binturong T605 2             | 0,18154882 |
| Otocolobus manul NCO28323 1              | Martes foina NCO20643 1                | 0,18155149 |
| Felis silvestris lybica KP202275 4       | Canis aureus KT448274 1                | 0,18155167 |
| Prionailurus rubiginosus NCO28304 2      | Lycaon pictus NCO28427 2               | 0,18155356 |
| Martes pennanti NCO20664 16              | Arctocephalus forsteri NCO04023 28     | 0,18155444 |
| Ursus thibetanus formosanus NCO09331 1   | Civettictis civetta GLC19 1            | 0,18155453 |
| Ursus thibetanus laniger MH281753 2      | Ailurus fulgens NCO11124 1             | 0,18155469 |
| Ursus thibetanus laniger MH281753 2      | Bassariscus sumichrasti SRX1099089 1   | 0,18155481 |
| Ursus spelaeus EU327344 13               | Mustela eversmannii NCO28013 1         | 0,18155551 |
| Ursus maritimus GU573488 Svalbard        | Neovison vison NCO20641 3              | 0,18155794 |
| Viverricula indica NCO25296 2            | Helarctos malayanus NCO09968 2         | 0,18156009 |
| Zalophus californianus NCO08416 1        | Ictonyx striatus T299 1                | 0,18156688 |
| Lycalopex sechurae KT448284 1            | Catopuma temminckii NCO27115 41        | 0,18156706 |
| Smilodon populator MF871700 1            | Martes foina NCO20643 1                | 0,18156937 |
| Felis margarita NCO28308 1               | Canis lupus familiaris NCO02008 1231   | 0,18157198 |
| Ursus americanus JX196366 3              | Neophoca cinerea NCO08419 1            | 0,18157323 |
| Viverra tangalunga MH464792 1            | Civettictis civetta NCO33378 1         | 0,18157856 |
| Galidictis fasciata DM333 1              | Canis adustus KT448271 1               | 0,18157941 |
| Ursus arctos isabellinus 1885 2          | Homotherium latidens MF871702 3        | 0,18157965 |
| Civettictis civetta NCO33378 1           | Arctotherium sp NCO30174 1             | 0,18157999 |
| Martes flavigula NCO12141 3              | Leopardus guigna NCO28321 1            | 0,18158133 |
| Arctocephalus townsendi NCO08420 1       | Ailurus fulgens styani NCO09691 1      | 0,18158709 |
| Leopardus colocolo NCO28314 1            | Canis lupus familiaris NCO02008 1231   | 0,18158889 |
| Neophoca cinerea NCO08419 1              | Meles leucurus NCO39173 4              | 0,18158907 |
| Prionodon linsang ERR2391707 1           | Mustela frenata NCO20640 1             | 0,18158916 |
| Phocarcctos hookeri NCO08418 1           | Martes americana NCO20642 1            | 0,18158965 |
| Lutra lutra NCO11358 9                   | Genetta servalina NCO24568 2           | 0,18159127 |
| Vulpes zerda K1603240 1                  | Erigonathus barbatus NCO08426 1        | 0,18159403 |
| Paradoxurus jerdoni MH464793 1           | Canis mesomelas KT448280 1             | 0,18159406 |
| Mustela eversmannii NCO28013 1           | Arctocephalus pusillus NCO08417 1      | 0,18159422 |
| Viverricula indica NCO25296 2            | Enhydra lutris NCO09692 1              | 0,18159466 |
| Taxidea taxus NCO20646 1                 | Urva javanica T413 1                   | 0,18159509 |
| Fossa fossana D350 1                     | Arctocephalus pusillus NCO08417 1      | 0,18159516 |
| Martes flavigula NCO12141 3              | Canis lupus familiaris NCO02008 1231   | 0,18159594 |
| Prionailurus planiceps NCO28312 6        | Lutra lutra LC050126 1                 | 0,18159825 |
| Meles anakuma NCO09677 1                 | Leopardus tigrinus NCO28317 1          | 0,18159841 |
| Leopardus pardalis T262 1                | Arctonyx collaris NCO20645 1           | 0,18159841 |
| Paradoxurus hermaphroditus NCO39591 1    | Meles anakuma NCO09677 1               | 0,18159923 |
| Poecilogale albinucha T602 1             | Arctocephalus forsteri KT693377 17     | 0,18159996 |
| Meles meles T303 3                       | Caracal caracal NCO28306 1             | 0,18160053 |
| Meles anakuma NCO09677 1                 | Arctotherium sp NCO30174 1             | 0,18160143 |
| Mustela itatsi NCO34330 19               | Lynx rufus NCO14456 3                  | 0,18160219 |
| Paradoxurus hermaphroditus NLNC 1        | Mustela sibirica AP017394 11           | 0,18160245 |
| Mustela itatsi NCO34330 19               | Leopardus pardalis NCO28315 1          | 0,18160246 |
| Otocolobus manul NCO28323 1              | Mustela itatsi NCO34330 19             | 0,18160431 |
| Melogale moschata KP726273 1             | Leopardus tigrinus NCO28317 1          | 0,18160477 |
| Paguma larvata PDD511 2                  | Ailurus fulgens NCO11124 1             | 0,18160494 |
| Viverricula indica NCO25296 2            | Mustela nigripes NCO24942 1            | 0,18160506 |
| Otaria byronia OTAB 1                    | Martes foina NCO20643 1                | 0,18160561 |
| Melogale moschata NCO20644 1             | Genetta servalina NCO24568 2           | 0,18160573 |
| Vulpes zerda K1603240 1                  | Leopardus pardalis T262 1              | 0,18160616 |
| Prionodon linsang ERR2391707 1           | Mirounga angustirostris SRR10331586 1  | 0,18160799 |
| Vulpes lagopus NCO26529 3                | Prionailurus bengalensis CKM45 20      | 0,1816086  |
| Viverricula indica NCO25296 2            | Mustela altaica NCO21751 1             | 0,181609   |
| Homotherium latidens MF871702 3          | Canis anthus NCO27956 2                | 0,18161042 |
| Viverricula indica NCO25296 2            | Procyon lotor AB462046 3               | 0,18161045 |
| Prionodon pardicolor NCO24569 2          | Phoca fasciata NCO08428 1              | 0,18161121 |
| Otocolobus manul NCO28323 1              | Neovison vison NCO20641 3              | 0,18161678 |
| Lynx pardinus NCO28319 161               | Ictonyx striatus T299 1                | 0,18161745 |
| Otocolobus manul NCO28323 1              | Bassariscus sumichrasti SRX1099089 1   | 0,18161856 |
| Lycalopex sechurae KT448284 1            | Leptailurus serval NCO28316 1          | 0,18162012 |
| Homotherium latidens MF871702 3          | Canis aureus KT448274 1                | 0,18162045 |
| Meles meles T303 3                       | Canis lupus familiaris NCO02008 1231   | 0,18162622 |
| Zalophus californianus NCO08416 1        | Ursus maritimus GU573488 Svalbard      | 0,18162808 |
| Procyon lotor AB462046 3                 | Mephitis mephitis NCO20648 1           | 0,18162888 |
| Martes martes T302 3                     | Leopardus colocolo NCO28314 1          | 0,181629   |
| Mustela nivalis T306 5                   | Acinonyx jubatus NCO05212 3            | 0,18162923 |
| Chrysocyon brachyurus NCO24172 1         | Catopuma badia NCO28300 1              | 0,18163036 |
| Helarctos malayanus NCO09968 2           | Canis adustus KT448271 1               | 0,1816328  |
| Zalophus californianus NCO08416 1        | Poecilogale albinucha T602 1           | 0,18163313 |
| Hemigalus derbyanus MH464791 1           | Tapirus terrestris T358                | 0,18163393 |
| Leopardus wiedii NCO28318 1              | Canis lupus familiaris NCO02008 1231   | 0,18163769 |
| Mustela sibirica AP017394 11             | Civettictis civetta NCO33378 1         | 0,18164165 |
| Prionailurus bengalensis NCO28301 12     | Martes flavigula NCO12141 3            | 0,18164369 |
| Panthera tigris amoyensis NCO14770 2     | Monachus monachus NCO44972 5           | 0,18164547 |
| Smilodon populator MF871700 1            | Helarctos malayanus NCO09968 2         | 0,18164741 |
| Monachus schauinslandi NCO08421 1        | Cuon alpinus NCO13445 3                | 0,1816505  |
| Nasua nasua NCO20647 1                   | Lutra lutra NCO11358 9                 | 0,18165062 |
| Diplogale hosi MH464790 1                | Ailurus fulgens styani NCO09691 1      | 0,18165265 |
| Viverra tangalunga MH464792 1            | Callorhinus ursinus NCO08415 1         | 0,18165304 |
| Melogale moschata KP726273 1             | Arctocephalus pusillus NCO08417 1      | 0,18165998 |
| Vulpes corsac NCO23958 1                 | Mustela frenata NCO20640 1             | 0,18166138 |
| Potos flavus T414 1                      | Mungos mungo MMC7 1                    | 0,18166147 |
| Ommatophoca rossii AY377287etc 1         | Galidictis fasciata DM333 1            | 0,18166335 |
| Salanoia concolor D378 1                 | Mustela erminea T305 2                 | 0,18166386 |
| Martes flavigula NCO12141 3              | Leopardus colocolo NCO28314 1          | 0,18166433 |
| Mungos mungo MMC7 1                      | Arctocephalus pusillus NCO08417 1      | 0,18166478 |
| Canis latrans NCO08093 7                 | Arctonyx collaris NCO20645 1           | 0,18166588 |
| Melogale moschata NCO20644 1             | Arctocephalus pusillus NCO08417 1      | 0,18166608 |
| Vulpes vulpes NCO08434 5                 | Phoca groenlandica NCO08429 54         | 0,18166773 |
| Procyon lotor AB462049 4                 | Ailurus fulgens NCO11124 1             | 0,18166837 |
| Urocyon cinereoargenteus NCO26723 21     | Phoca fasciata NCO08428 1              | 0,18166895 |
| Urocyon littoralis catalinae KP129018 15 | Phoca fasciata NCO08428 1              | 0,18166898 |
| Leptailurus serval NCO28316 1            | Ailurus fulgens NCO11124 1             | 0,18166989 |

|                                        |                               |            |
|----------------------------------------|-------------------------------|------------|
| Ursus arctos GU573486 5                | Phataginus tricuspis NCO26780 | 0,2399921  |
| Ursus thibetanus formosanus NCO09331 1 | Phataginus tricuspis NCO26780 | 0,24006689 |
| Ursus arctos EU497665 29               | Phataginus tricuspis NCO26780 | 0,24010971 |
| Ursus arctos GU573491 207              | Phataginus tricuspis NCO26780 | 0,24011619 |
| Ursus arctos AP012576 6                | Phataginus tricuspis NCO26780 | 0,2401271  |
| Ursus maritimus NCO03428 31            | Phataginus tricuspis NCO26780 | 0,24017687 |
| Galidia elegans D146 1                 | Phataginus tricuspis NCO26780 | 0,2401855  |
| Potos flavus T414 1                    | Phataginus tricuspis NCO26780 | 0,2403632  |
| Phocarcctos hookeri NCO08418 1         | Phataginus tricuspis NCO26780 | 0,24036369 |
| Arctotherium sp NCO30174 1             | Phataginus tricuspis NCO26780 | 0,24036835 |
| Ursus arctos prunosus MG066703 3       | Phataginus tricuspis NCO26780 | 0,24040549 |
| Gulo gulo NCO09685 3                   | Phataginus tricuspis NCO26780 | 0,2404274  |
| Procyon lotor AB462046 3               | Phataginus tricuspis NCO26780 | 0,24044034 |
| Ursus arctos isabellinus 1885 2        | Phataginus tricuspis NCO26780 | 0,24044681 |
| Martes americana NCO20642 1            | Phataginus tricuspis NCO26780 | 0,24051051 |
| Ursus arctos prunosus MG066703 3       | Phataginus tricuspis NCO26780 | 0,24052152 |
| Ursus americanus JX196366 3            | Phataginus tricuspis NCO26780 | 0,24069238 |
| Melogale moschata NCO20644 1           | Phataginus tricuspis NCO26780 | 0,24094579 |
| Lutra lutra NCO11358 9                 | Phataginus tricuspis NCO26780 | 0,24098483 |
| Martes martes T302 3                   | Phataginus tricuspis NCO26780 | 0,24106155 |
| Odobenus rosmarus NCO04029 29          | Phataginus tricuspis NCO26780 | 0,24111831 |
| Procyon lotor AB462049 4               | Phataginus tricuspis NCO26780 | 0,24124756 |
| Vulpes vulpes NCO08434 5               | Phataginus tricuspis NCO26780 | 0,241355   |
| Vulpes ferrillata NCO27935 1           | Phataginus tricuspis NCO26780 | 0,24143265 |
| Lutra sumatrana NCO35810 1             | Phataginus tricuspis NCO26780 | 0,24153519 |
| Melogale moschata V0735A 1             | Phataginus tricuspis NCO26780 | 0,24159856 |
| Martes zibellina NCO11579 39           | Phataginus tricuspis NCO26780 | 0,24179113 |
| Melogale moschata KP726273 1           | Phataginus tricuspis NCO26780 | 0,24185903 |
| Vulpes corsac NCO23958 1               | Phataginus tricuspis NCO26780 | 0,24190119 |
| Otocyon megalotis SAF1 2               | Phataginus tricuspis NCO26780 | 0,24253331 |
| Crocota crocata NCO20670 3             | Phataginus tricuspis NCO26780 | 0,24254262 |
| Tremarctos ornatus NCO09969 2          | Phataginus tricuspis NCO26780 | 0,24259415 |
| Cryptoprocta ferox CFC13 1             | Phataginus tricuspis NCO26780 | 0,24269819 |
| Martes pennanti NCO20664 16            | Phataginus tricuspis NCO26780 | 0,24320097 |
| Vulpes zerda K1603240 1                | Phataginus tricuspis NCO26780 | 0,24339955 |
| Speothos venaticus C48 2               | Phataginus tricuspis NCO26780 | 0,24389814 |
| Urocyon littoralis catalinae KP129018  | Phataginus tricuspis NCO26780 | 0,24406604 |
| Urocyon cinereoargenteus NCO26723 21   | Phataginus tricuspis NCO26780 | 0,24420853 |
| Vulpes lagopus NCO26529 3              | Phataginus tricuspis NCO26780 | 0,24508271 |
| Aonyx cinerea NCO35814 2               | Phataginus tricuspis NCO26780 | 0,24578962 |
| Bassaricyon neblina SRX1097850 1       | Phataginus tricuspis NCO26780 | 0,24601918 |
| Melursus ursinus NCO09970 2            | Phataginus tricuspis NCO26780 | 0,24627002 |
| Nasua nasua NCO20647 1                 | Phataginus tricuspis NCO26780 | 0,24691479 |
| Lutrogale perspicillata NCO35811 1     | Phataginus tricuspis NCO26780 | 0,24853124 |
| Mellivora capensis T370 1              | Phataginus tricuspis NCO26780 | 0,25034422 |

|                                        |                                        |            |
|----------------------------------------|----------------------------------------|------------|
| Potos flavus T414 1                    | Lynx rufus NCO14456 3                  | 0,18167089 |
| Viverra zibetha T609 1                 | Ailurus fulgens NCO11124 1             | 0,18167141 |
| Viverricula indica KX891751 1          | Ailurus fulgens NCO11124 1             | 0,18167184 |
| Puma yagouaroundi NCO28311 1           | Potos flavus T414 1                    | 0,18167195 |
| Smilodon populator MF871700 1          | Arctotherium sp NCO30174 1             | 0,18167207 |
| Panthera leo spelaea KX258452 2        | Mirounga leonina NCO08422 1            | 0,18167216 |
| Zalophus wolfebaeki SRR4431565 1       | Mustela kathiah NCO23210 1             | 0,1816723  |
| Mustela putorius NCO20638 4            | Catopuma badia NCO28300 1              | 0,18167257 |
| Mustela putorius NCO20638 4            | Leopardus guigna NCO28321 1            | 0,18167298 |
| Puma yagouaroundi NCO28311 1           | Martes americana NCO20642 1            | 0,18167299 |
| Martes americana NCO20642 1            | Leopardus pardalis NCO28315 1          | 0,18167309 |
| Mephitis mephitis NCO20648 1           | Lutra sumatrana NCO35810 1             | 0,18167385 |
| Felis silvestris lybica KP202275 4     | Canis latrans NCO08093 7               | 0,18167445 |
| Viverricula indica KX891745 1          | Procyon lotor AB462046 3               | 0,18167509 |
| Martes martes T302 3                   | Genetta servalina NCO24568 2           | 0,18167537 |
| Martes martes T302 3                   | Arctotherium sp NCO30174 1             | 0,18167581 |
| Ursus arctos GU573491 207              | Arctocepalus pusillus NCO08417 1       | 0,18167633 |
| Ursus maritimus NCO03428 31            | Mustela nigripes NCO24942 1            | 0,18167727 |
| Ursus arctos pruinosus MGO66703 3      | Nandinia binotata NCO24567 1           | 0,18167742 |
| Mustela altaica NCO21751 1             | Leopardus pardalis NCO28315 1          | 0,18167841 |
| Martes martes T302 3                   | Leopardus guigna NCO28321 1            | 0,1816788  |
| Ursus americanus JX196366 3            | Homotherium latidens MF871702 3        | 0,181679   |
| Prionailurus bengalensis CKM45 20      | Canis aureus KT448274 1                | 0,18167996 |
| Prionailurus planiceps NCO28312 6      | Martes martes T302 3                   | 0,18168038 |
| Ursus thibetanus mupinensis NCO08753 2 | Genetta servalina NCO24568 2           | 0,18168187 |
| Ursus spelaeus NCO11112 8              | Martes zibellina NCO11579 39           | 0,18168312 |
| Lynx lynx NCO27083 4                   | Ictonyx striatus T299 1                | 0,18168385 |
| Phoca groenlandica NCO08429 54         | Parahyaena brunnea NCO38159 15         | 0,18168461 |
| Prionailurus planiceps NCO28312 6      | Ictonyx striatus T299 1                | 0,18168561 |
| Neovison vison NCO20641 3              | Lycaon pictus NCO28427 2               | 0,18168733 |
| Zalophus wolfebaeki SRR4431565 1       | Ursus arctos GU573486 5                | 0,1816874  |
| Prionailurus bengalensis NCO28301 12   | Lycaon pictus NCO28427 2               | 0,18168895 |
| Puma yagouaroundi NCO28311 1           | Lycaon pictus NCO28427 2               | 0,18168963 |
| Ursus spelaeus NCO11112 8              | Arctonyx collaris NCO20645 1           | 0,18168996 |
| Phoca largha NCO08430 1                | Canis aureus KT448274 1                | 0,1816906  |
| Ursus arctos pruinosus MGO66703 3      | Ommatophoca rossii AY377287etc 1       | 0,18169065 |
| Ursus spelaeus EU327344 13             | Melogale moschata NCO20644 1           | 0,18169102 |
| Phoca groenlandica NCO08429 54         | Canis mesomelas KT448280 1             | 0,18169108 |
| Viverricula indica NCO25296 2          | Ursus thibetanus formosanus NCO09331 1 | 0,18169133 |
| Urva semitorquata MH464789 1           | Canis lupus familiaris NCO02008 1231   | 0,18169267 |
| Nandinia binotata NCO24567 1           | Arctocepalus forsteri NCO04023 28      | 0,18169308 |
| Ursus spelaeus NCO11112 8              | Martes foina NCO20643 1                | 0,18169832 |
| Panthera pardus NCO10641 5             | Mirounga leonina NCO08422 1            | 0,18170099 |
| Mustela eversmannii NCO28013 1         | Canis lupus chanco NCO10340 4          | 0,18170296 |
| Lycaon pictus NCO28427 2               | Acinonyx jubatus NCO05212 3            | 0,18170407 |
| Melogale moschata NCO20644 1           | Civettictis civetta NCO33378 1         | 0,18170927 |
| Genetta servalina NCO24568 2           | Canis lupus chanco NCO10340 4          | 0,18170966 |
| Viverricula indica KX891745 1          | Eumetopias jubatus NCO04030 10         | 0,1817109  |
