# Supplementary material for: Evolutionary history of Carnivora (Mammalia, Laurasiatheria) inferred from mitochondrial genomes
Source: PubMed Central journal article supplement (PMC7886153; doi:10.1371/journal.pone.0240770), 2021-02-16
Supplement: pone.0240770.s005.pdf [file pone.0240770.s005.pdf]

**S5 Appendix. Bayesian tree reconstructed using the *mtDNA-Tv* dataset (220 taxa and 14,892 bp) and JC69+I+G model**

**Evolutionary history of Carnivora (Mammalia, Laurasiatheria) inferred from mitochondrial genomes**

Alexandre Hassanin<sup>1\*</sup>, Géraldine Veron<sup>1</sup>, Anne Ropiquet<sup>2</sup>, Bettine Jansen van Vuuren<sup>3</sup>, Alexis Lécu<sup>4</sup>, Steven M. Goodman<sup>5</sup>, Jibrán Haider<sup>1,6,7</sup>, Trung Thanh Nguyen<sup>1</sup>

<sup>1</sup> Institut de Systématique, Évolution, Biodiversité (ISYEB), Sorbonne Université, MNHN, CNRS, EPHE, UA, Paris.

<sup>2</sup> Department of Natural Sciences, Faculty of Science and Technology, Middlesex University, United Kingdom.

<sup>3</sup> Centre for Ecological Genomics and Wildlife Conservation, Department of Zoology, University of Johannesburg, South Africa.

<sup>4</sup> Parc zoologique de Paris, Muséum national d'Histoire naturelle, Paris.

<sup>5</sup> Field Museum of Natural History, Chicago, IL, USA.

<sup>6</sup> Department of Wildlife Management, Pir Mehr Ali Shah, Arid Agriculture University Rawalpindi, Pakistan.

<sup>7</sup> Forest Parks & Wildlife Department Gilgit-Baltistan, Pakistan.

\* Correspondence: [alexandre.hassanin@mnhn.fr](mailto:alexandre.hassanin@mnhn.fr)

#NEXUS

[ID: 2871343750]

begin taxa;

dimensions ntax=220;

taxlabels

Tapirus\_terrestris\_T358  
Phataginus\_tricuspis\_NC026780  
Acinonyx\_jubatus\_NC005212\_3  
Ailuropoda\_melanoleuca\_NC009492\_5  
Ailurus\_fulgens\_NC011124\_1  
Ailurus\_fulgens\_styani\_NC009691\_1  
Aonyx\_cinerea\_NC035814\_2  
Arctictis\_binturong\_T605\_2  
Arctocephalus\_australis\_MG023139\_1  
Arctocephalus\_forsteri\_KT693377\_17  
Arctocephalus\_forsteri\_NC004023\_28  
Arctocephalus\_gazella\_BK010918\_1  
Arctocephalus\_pusillus\_NC008417\_1  
Arctocephalus\_townsendi\_NC008420\_1  
Arctodus\_simus\_NC011116\_1  
Arctonyx\_collaris\_NC020645\_1  
Arctotherium\_sp\_NC030174\_1  
Atilax\_paludinosus\_T606\_1  
Bassaricyon\_neblina\_SRX1097850\_1  
Bassariscus\_sumichrasti\_SRX1099089\_1  
Bdeogale\_nigripes\_GLC15\_1  
Callorhinus\_ursinus\_NC008415\_1  
Canis\_adustus\_KT448271\_1  
Canis\_anthus\_NC027956\_2  
Canis\_aureus\_KT448274\_1  
Canis\_latrans\_NC008093\_7  
Canis\_lupus\_chanco\_NC010340\_4  
Canis\_lupus\_familiaris\_NC002008\_1231  
Canis\_mesomelas\_KT448280\_1  
Caracal\_caracal\_NC028306\_1  
Catopuma\_badia\_NC028300\_1  
Catopuma\_temminckii\_NC027115\_41  
Chrotogale\_owstoni\_T607\_1  
Chrysocyon\_brachyurus\_NC024172\_1  
Civettictis\_civetta\_GLC19\_1  
Civettictis\_civetta\_NC033378\_1  
Conepatus\_chinga\_NC042596\_1  
Crocuta\_crocuta\_NC020670\_3  
Crossarchus\_platycephalus\_C7AR66\_1  
Cryptoprocta\_ferox\_CFC13\_1  
Cuon\_alpinus\_NC013445\_3  
Cynictis\_penicillata\_T375\_1  
Cynogale\_bennetti\_KY117544\_1  
Cystophora\_cristata\_NC008427\_1  
Diplogale\_hosei\_MH464790\_1  
Enhydra\_lutris\_NC009692\_1  
Erignathus\_barbatus\_NC008426\_1  
Eumetopias\_jubatus\_NC004030\_10  
Eupleres\_goudotii\_D128\_1  
Felis\_catus\_NC001700\_2  
Felis\_chaus\_NC028307\_1  
Felis\_margarita\_NC028308\_1  
Felis\_nigripes\_NC028309\_1  
Felis\_silvestris\_lybica\_KP202275\_4  
Fossa\_fossana\_D350\_1

Galerella\_sanguinea\_T378\_1  
Galictis\_vittata\_T412\_1  
Galidia\_elegans\_D146\_1  
Galidictis\_fasciata\_DM333\_1  
Genetta\_abyssinica\_MG489822\_1  
Genetta\_genetta\_T297\_1  
Genetta\_servalina\_NC024568\_2  
Gulo\_gulo\_NC009685\_3  
Halichoerus\_grypus\_NC001602\_2  
Helarctos\_malayanus\_NC009968\_2  
Helogale\_parvula\_SRR7637809\_1  
Hemigalus\_derbyanus\_MH464791\_1  
Herpestes\_brachyurus\_KY117547\_1  
Herpestes\_javanicus\_NC006835\_1  
Herpestes\_javanicus\_T413\_1  
Herpestes\_naso\_C07XAR110\_1  
Herpestes\_semitorquatus\_MH464789\_1  
Homotherium\_latidens\_MF871702\_3  
Hyaena\_hyaena\_NC020669\_1  
Hydrurga\_leptonyx\_NC008425\_1  
Ichneumia\_albicauda\_T603\_1  
Ictonyx\_striatus\_T299\_1  
Leopardus\_colocolo\_NC028314\_1  
Leopardus\_geoffroyi\_NC028320\_1  
Leopardus\_guigna\_NC028321\_1  
Leopardus\_jacobita\_NC028322\_1  
Leopardus\_pardalis\_NC028315\_1  
Leopardus\_pardalis\_T262\_1  
Leopardus\_tigrinus\_NC028317\_1  
Leopardus\_wiedii\_NC028318\_1  
Leptailurus\_serval\_NC028316\_1  
Leptonychotes\_weddellii\_NC008424\_1  
Lobodon\_carcinophaga\_NC008423\_1  
Lontra\_canadensis\_SRR10409165\_1  
Lutra\_lutra\_LC050126\_1  
Lutra\_lutra\_NC011358\_9  
Lutra\_sumatrana\_NC035810\_1  
Lutrogale\_perspicillata\_NC035811\_1  
Lycalopex\_sechurae\_KT448284\_1  
Lycaon\_pictus\_NC028427\_2  
Lynx\_canadensis\_NC028313\_1  
Lynx\_lynx\_NC027083\_4  
Lynx\_pardinus\_NC028319\_161  
Lynx\_rufus\_NC014456\_3  
Martes\_americana\_NC020642\_1  
Martes\_flavigula\_NC012141\_3  
Martes\_foina\_NC020643\_1  
Martes\_martes\_T302\_3  
Martes\_melampus\_NC009678\_1  
Martes\_pennanti\_NC020664\_16  
Martes\_zibellina\_NC011579\_39  
Meles\_anakuma\_NC009677\_1  
Meles\_leucurus\_NC039173\_4  
Meles\_meles\_T303\_3  
Mellivora\_capensis\_T370\_1  
Melogale\_moschata\_KP726273\_1  
Melogale\_moschata\_NC020644\_1  
Melogale\_moschata\_V0735A\_1  
Melursus\_ursinus\_NC009970\_2  
Mephitis\_mephitis\_NC020648\_1

Mirounga\_angustirostris\_SRR10331586\_1  
Mirounga\_leonina\_NC008422\_1  
Monachus\_monachus\_NC044972\_5  
Monachus\_schauinslandi\_NC008421\_1  
Mungos\_mungo\_MMC7\_1  
Mungos\_mungo\_SRR7704821\_1  
Mungotictis\_decemlineata\_NC027828\_1  
Mustela\_altaica\_NC021751\_1  
Mustela\_erminea\_T305\_2  
Mustela\_eversmannii\_NC028013\_1  
Mustela\_frenata\_NC020640\_1  
Mustela\_itatsi\_NC034330\_19  
Mustela\_kathiah\_NC023210\_1  
Mustela\_nigripes\_NC024942\_1  
Mustela\_nivalis\_T306\_5  
Mustela\_putorius\_NC020638\_4  
Mustela\_sibirica\_AP017394\_11  
Mustela\_sibirica\_NC020637\_6  
Nandinia\_binotata\_NC024567\_1  
Nasua\_nasua\_NC020647\_1  
Neofelis\_nebulosa\_NC008450\_3  
Neophoca\_cinerea\_NC008419\_1  
Neovison\_vison\_NC020641\_3  
Nyctereutes\_procyonoides\_NC013700\_3  
Odobenus\_rosmarus\_NC004029\_29  
Ommatophoca\_rossii\_AY377287etc\_1  
Otaria\_byronia\_OTAB\_1  
Otocolobus\_manul\_NC028323\_1  
Otocyon\_megalotis\_SAF1\_2  
Paguma\_larvata\_PDDS11\_2  
Panthera\_leo\_NERO\_19  
Panthera\_leospelaea\_KX258452\_2  
Panthera\_onca\_KP202264\_2  
Panthera\_onca\_NC022842\_1  
Panthera\_pardus\_NC010641\_5  
Panthera\_pardus\_japonensis\_KJ866876\_8  
Panthera\_tigris\_NC010642\_35  
Panthera\_tigris\_amoyensis\_NC014770\_2  
Panthera\_uncia\_KP202269\_1  
Panthera\_uncia\_NC010638\_1  
Paradoxurus\_hermaphroditus\_NC039591\_1  
Paradoxurus\_hermaphroditus\_NLNC\_1  
Paradoxurus\_jerdoni\_MH464793\_1  
Parahyaena\_brunnea\_NC038159\_15  
Pardofelis\_marmorata\_NLN3\_2  
Phoca\_fasciata\_NC008428\_1  
Phoca\_groenlandica\_NC008429\_54  
Phoca\_largha\_NC008430\_1  
Phoca\_vitulina\_NC001325\_1  
Phocarcetos\_hookeri\_NC008418\_1  
Poecilogale\_albinucha\_T602\_1  
Potos\_flavus\_T414\_1  
Prionailurus\_bengalensis\_CKM45\_20  
Prionailurus\_bengalensis\_NC028301\_12  
Prionailurus\_planiceps\_KY682741\_4  
Prionailurus\_planiceps\_NC028312\_6  
Prionailurus\_rubiginosus\_NC028304\_2  
Prionailurus\_viverrinus\_NC028305\_1  
Prionodon\_linsang\_ERR2391707\_1  
Prionodon\_pardicolor\_NC024569\_2

Procyon\_lotor\_AB462046\_3  
Procyon\_lotor\_AB462049\_4  
Profelis\_aurata\_NC028299\_1  
Proteles\_cristata\_T393\_6  
Puma\_concolor\_NC016470\_22  
Puma\_yagouaroundi\_NC028311\_1  
Pusa\_caspica\_NC008431\_1  
Pusa\_hispida\_NC\_008433\_1  
Pusa\_sibirica\_NC008432\_2  
Salanoia\_concolor\_D378\_1  
Smilodon\_populator\_MF871700\_1  
Speothos\_venaticus\_C48\_2  
Spilogale\_putorius\_NC010497\_1  
Suricata\_suricata\_SSM10\_1  
Taxidea\_taxus\_NC020646\_1  
Tremarctos\_ornatus\_NC009969\_2  
Urocyon\_cinereoargenteus\_NC026723\_21  
Urocyon\_littoralis\_catalinae\_KP129018\_15  
Ursus\_americanus\_JX196366\_3  
Ursus\_arctos\_AP012576\_6  
Ursus\_arctos\_EU497665\_29  
Ursus\_arctos\_GU573486\_5  
Ursus\_arctos\_GU573491\_207  
Ursus\_arctos\_isabellinus\_18B5\_2  
Ursus\_arctos\_pruinosus\_MG066703\_3  
Ursus\_maritimus\_GU573488\_Svalbard  
Ursus\_maritimus\_NC003428\_31  
Ursus\_spelaeus\_EU327344\_13  
Ursus\_spelaeus\_NC011112\_8  
Ursus\_thibetanus\_formosanus\_NC009331\_1  
Ursus\_thibetanus\_laniger\_MH281753\_2  
Ursus\_thibetanus\_mupinensis\_NC008753\_2  
Ursus\_thibetanus\_thibetanus\_NC011118\_4  
Viverra\_tangalunga\_MH464792\_1  
Viverra\_zibetha\_T609\_1  
Viverricula\_indica\_KX891745\_1  
Viverricula\_indica\_KX891751\_1  
Viverricula\_indica\_NC025296\_2  
Vulpes\_corsac\_NC023958\_1  
Vulpes\_ferrilata\_NC027935\_1  
Vulpes\_lagopus\_NC026529\_3  
Vulpes\_vulpes\_NC008434\_5  
Vulpes\_zerda\_KJ603240\_1  
Zalophus\_californianus\_NC008416\_1  
Zalophus\_wollebaeki\_SRR4431565\_1  
;

end;

begin trees;

translate

1 Tapirus\_terrestris\_T358,  
2 Phataginus\_tricuspidis\_NC026780,  
3 Acinonyx\_jubatus\_NC005212\_3,  
4 Ailuropoda\_melanoleuca\_NC009492\_5,  
5 Ailurus\_fulgens\_NC011124\_1,  
6 Ailurus\_fulgens\_styani\_NC009691\_1,  
7 Aonyx\_cinerea\_NC035814\_2,  
8 Arctictis\_binturong\_T605\_2,  
9 Arctocephalus\_australis\_MG023139\_1,  
10 Arctocephalus\_forsteri\_KT693377\_17,  
11 Arctocephalus\_forsteri\_NC004023\_28,

12 *Arctocephalus\_gazella*\_BK010918\_1,  
13 *Arctocephalus\_pusillus*\_NC008417\_1,  
14 *Arctocephalus\_townsendi*\_NC008420\_1,  
15 *Arctodus\_simus*\_NC011116\_1,  
16 *Arctonyx\_collaris*\_NC020645\_1,  
17 *Arctotherium\_sp*\_NC030174\_1,  
18 *Atilax\_paludinosus*\_T606\_1,  
19 *Bassaricyon\_neblina*\_SRX1097850\_1,  
20 *Bassariscus\_sumichrasti*\_SRX1099089\_1,  
21 *Bdeogale\_nigripes*\_GLC15\_1,  
22 *Callorhinus\_ursinus*\_NC008415\_1,  
23 *Canis\_adustus*\_KT448271\_1,  
24 *Canis\_anthus*\_NC027956\_2,  
25 *Canis\_aureus*\_KT448274\_1,  
26 *Canis\_latrans*\_NC008093\_7,  
27 *Canis\_lupus\_chanco*\_NC010340\_4,  
28 *Canis\_lupus\_familiaris*\_NC002008\_1231,  
29 *Canis\_mesomelas*\_KT448280\_1,  
30 *Caracal\_caracal*\_NC028306\_1,  
31 *Catopuma\_badia*\_NC028300\_1,  
32 *Catopuma\_temminckii*\_NC027115\_41,  
33 *Chrotogale\_owstoni*\_T607\_1,  
34 *Chrysocyon\_brachyurus*\_NC024172\_1,  
35 *Civettictis\_civetta*\_GLC19\_1,  
36 *Civettictis\_civetta*\_NC033378\_1,  
37 *Conepatus\_chinga*\_NC042596\_1,  
38 *Crocuta\_crocuta*\_NC020670\_3,  
39 *Crossarchus\_platycephalus*\_C7AR66\_1,  
40 *Cryptoprocta\_ferox*\_CFC13\_1,  
41 *Cuon\_alpinus*\_NC013445\_3,  
42 *Cynictis\_penicillata*\_T375\_1,  
43 *Cynogale\_bennetti*\_KY117544\_1,  
44 *Cystophora\_cristata*\_NC008427\_1,  
45 *Diplogale\_hosei*\_MH464790\_1,  
46 *Enhydra\_lutris*\_NC009692\_1,  
47 *Erignathus\_barbatus*\_NC008426\_1,  
48 *Eumetopias\_jubatus*\_NC004030\_10,  
49 *Eupleres\_goudotii*\_D128\_1,  
50 *Felis\_catus*\_NC001700\_2,  
51 *Felis\_chaus*\_NC028307\_1,  
52 *Felis\_margarita*\_NC028308\_1,  
53 *Felis\_nigripes*\_NC028309\_1,  
54 *Felis\_silvestris\_lybica*\_KP202275\_4,  
55 *Fossa\_fossana*\_D350\_1,  
56 *Galerella\_sanguinea*\_T378\_1,  
57 *Galictis\_vittata*\_T412\_1,  
58 *Galidia\_elegans*\_D146\_1,  
59 *Galidictis\_fasciata*\_DM333\_1,  
60 *Genetta\_abyssinica*\_MG489822\_1,  
61 *Genetta\_genetta*\_T297\_1,  
62 *Genetta\_servalina*\_NC024568\_2,  
63 *Gulo\_gulo*\_NC009685\_3,  
64 *Halichoerus\_grypus*\_NC001602\_2,  
65 *Helarctos\_malayanus*\_NC009968\_2,  
66 *Helogale\_parvula*\_SRR7637809\_1,  
67 *Hemigalus\_derbyanus*\_MH464791\_1,  
68 *Herpestes\_brachyurus*\_KY117547\_1,  
69 *Herpestes\_javanicus*\_NC006835\_1,  
70 *Herpestes\_javanicus*\_T413\_1,  
71 *Herpestes\_naso*\_C07XAR110\_1,

72 Herpestes semitorquatus\_MH464789\_1,  
73 Homotherium latidens\_MF871702\_3,  
74 Hyaena\_hyaena\_NC020669\_1,  
75 Hydrurga leptonyx\_NC008425\_1,  
76 Ichneumia albicauda\_T603\_1,  
77 Ictonyx striatus\_T299\_1,  
78 Leopardus colocolo\_NC028314\_1,  
79 Leopardus geoffroyi\_NC028320\_1,  
80 Leopardus guigna\_NC028321\_1,  
81 Leopardus jacobita\_NC028322\_1,  
82 Leopardus pardalis\_NC028315\_1,  
83 Leopardus pardalis\_T262\_1,  
84 Leopardus tigrinus\_NC028317\_1,  
85 Leopardus wiedii\_NC028318\_1,  
86 Leptailurus serval\_NC028316\_1,  
87 Leptonychotes weddellii\_NC008424\_1,  
88 Lobodon carcinophaga\_NC008423\_1,  
89 Lontra canadensis\_SRR10409165\_1,  
90 Lutra lutra\_LC050126\_1,  
91 Lutra lutra\_NC011358\_9,  
92 Lutra sumatrana\_NC035810\_1,  
93 Lutrogale perspicillata\_NC035811\_1,  
94 Lyncalopex sechurae\_KT448284\_1,  
95 Lycaon pictus\_NC028427\_2,  
96 Lynx canadensis\_NC028313\_1,  
97 Lynx lynx\_NC027083\_4,  
98 Lynx pardinus\_NC028319\_161,  
99 Lynx rufus\_NC014456\_3,  
100 Martes americana\_NC020642\_1,  
101 Martes flavigula\_NC012141\_3,  
102 Martes foina\_NC020643\_1,  
103 Martes martes\_T302\_3,  
104 Martes melampus\_NC009678\_1,  
105 Martes pennanti\_NC020664\_16,  
106 Martes zibellina\_NC011579\_39,  
107 Meles anakuma\_NC009677\_1,  
108 Meles leucurus\_NC039173\_4,  
109 Meles meles\_T303\_3,  
110 Mellivora capensis\_T370\_1,  
111 Melogale moschata\_KP726273\_1,  
112 Melogale moschata\_NC020644\_1,  
113 Melogale moschata\_V0735A\_1,  
114 Melursus ursinus\_NC009970\_2,  
115 Mephitis mephitis\_NC020648\_1,  
116 Mirounga angustirostris\_SRR10331586\_1,  
117 Mirounga leonina\_NC008422\_1,  
118 Monachus monachus\_NC044972\_5,  
119 Monachus schauinslandi\_NC008421\_1,  
120 Mungos mungo\_MMC7\_1,  
121 Mungos mungo\_SRR7704821\_1,  
122 Mungotictis decemlineata\_NC027828\_1,  
123 Mustela altaica\_NC021751\_1,  
124 Mustela erminea\_T305\_2,  
125 Mustela eversmannii\_NC028013\_1,  
126 Mustela frenata\_NC020640\_1,  
127 Mustela itatsi\_NC034330\_19,  
128 Mustela kathiah\_NC023210\_1,  
129 Mustela nigripes\_NC024942\_1,  
130 Mustela nivalis\_T306\_5,  
131 Mustela putorius\_NC020638\_4,

132 Mustela\_sibirica\_AP017394\_11,  
133 Mustela\_sibirica\_NC020637\_6,  
134 Nandinia\_binotata\_NC024567\_1,  
135 Nasua\_nasua\_NC020647\_1,  
136 Neofelis\_nebulosa\_NC008450\_3,  
137 Neophoca\_cinerea\_NC008419\_1,  
138 Neovison\_vison\_NC020641\_3,  
139 Nyctereutes\_procyonoides\_NC013700\_3,  
140 Odobenus\_rosmarus\_NC004029\_29,  
141 Ommatophoca\_rossii\_AY377287etc\_1,  
142 Otaria\_byronia\_OTAB\_1,  
143 Otocolobus\_manul\_NC028323\_1,  
144 Otocyon\_megalotis\_SAF1\_2,  
145 Paguma\_larvata\_PDDS11\_2,  
146 Panthera\_leo\_NERO\_19,  
147 Panthera\_leospelaea\_KX258452\_2,  
148 Panthera\_onca\_KP202264\_2,  
149 Panthera\_onca\_NC022842\_1,  
150 Panthera\_pardus\_NC010641\_5,  
151 Panthera\_pardus\_japonensis\_KJ866876\_8,  
152 Panthera\_tigris\_NC010642\_35,  
153 Panthera\_tigris\_amoyensis\_NC014770\_2,  
154 Panthera\_uncia\_KP202269\_1,  
155 Panthera\_uncia\_NC010638\_1,  
156 Paradoxurus\_hermaphroditus\_NC039591\_1,  
157 Paradoxurus\_hermaphroditus\_NLNC\_1,  
158 Paradoxurus\_jerdoni\_MH464793\_1,  
159 Parahyaena\_brunnea\_NC038159\_15,  
160 Pardofelis\_marmorata\_NLN3\_2,  
161 Phoca\_fasciata\_NC008428\_1,  
162 Phoca\_groenlandica\_NC008429\_54,  
163 Phoca\_largha\_NC008430\_1,  
164 Phoca\_vitulina\_NC001325\_1,  
165 Phocarcotus\_hookeri\_NC008418\_1,  
166 Poecilogale\_albinucha\_T602\_1,  
167 Potos\_flavus\_T414\_1,  
168 Prionailurus\_bengalensis\_CKM45\_20,  
169 Prionailurus\_bengalensis\_NC028301\_12,  
170 Prionailurus\_planiceps\_KY682741\_4,  
171 Prionailurus\_planiceps\_NC028312\_6,  
172 Prionailurus\_rubiginosus\_NC028304\_2,  
173 Prionailurus\_viverrinus\_NC028305\_1,  
174 Prionodon\_linsang\_ERR2391707\_1,  
175 Prionodon\_pardicolor\_NC024569\_2,  
176 Procyon\_lotor\_AB462046\_3,  
177 Procyon\_lotor\_AB462049\_4,  
178 Profelis\_aurata\_NC028299\_1,  
179 Proteles\_cristata\_T393\_6,  
180 Puma\_concolor\_NC016470\_22,  
181 Puma\_yagouaroundi\_NC028311\_1,  
182 Pusa\_caspica\_NC008431\_1,  
183 Pusa\_hispida\_NC\_008433\_1,  
184 Pusa\_sibirica\_NC008432\_2,  
185 Salanoia\_concolor\_D378\_1,  
186 Smilodon\_populator\_MF871700\_1,  
187 Speothos\_venaticus\_C48\_2,  
188 Spilogale\_putorius\_NC010497\_1,  
189 Suricata\_suricata\_SSM10\_1,  
190 Taxidea\_taxus\_NC020646\_1,  
191 Tremarctos\_ornatus\_NC009969\_2,



- 192 Urocyon cinereoargenteus\_NC026723\_21,
- 193 Urocyon littoralis\_catalinae\_KP129018\_15,
- 194 Ursus americanus\_JX196366\_3,
- 195 Ursus arctos\_AP012576\_6,
- 196 Ursus arctos\_EU497665\_29,
- 197 Ursus arctos\_GU573486\_5,
- 198 Ursus arctos\_GU573491\_207,
- 199 Ursus arctos\_isabellinus\_18B5\_2,
- 200 Ursus arctos pruinusosus\_MG066703\_3,
- 201 Ursus maritimus\_GU573488\_Svalbard,
- 202 Ursus maritimus\_NC003428\_31,
- 203 Ursus spelaeus\_EU327344\_13,
- 204 Ursus spelaeus\_NC011112\_8,
- 205 Ursus thibetanus\_formosanus\_NC009331\_1,
- 206 Ursus thibetanus\_laniger\_MH281753\_2,
- 207 Ursus thibetanus\_mupinensis\_NC008753\_2,
- 208 Ursus thibetanus\_thibetanus\_NC011118\_4,
- 209 Viverra tangalunga\_MH464792\_1,
- 210 Viverra zibetha\_T609\_1,
- 211 Viverricula indica\_KX891745\_1,
- 212 Viverricula indica\_KX891751\_1,
- 213 Viverricula indica\_NC025296\_2,
- 214 Vulpes corsac\_NC023958\_1,
- 215 Vulpes ferrilata\_NC027935\_1,
- 216 Vulpes lagopus\_NC026529\_3,
- 217 Vulpes vulpes\_NC008434\_5,
- 218 Vulpes zerda\_KJ603240\_1,
- 219 Zalophus californianus\_NC008416\_1,
- 220 Zalophus wolfebaeki\_SRR4431565\_1

```

tree con_all_compat = [&U]
(1[&prob=1.00000000e+00,prob_stddev=0.00000000e+00,prob_range={1.00000000e+00,1.00000000e+00},p
rob(percent)="100",prob+-sd="100+-0"]:5.948905e-02[&length_mean=5.96305434e-
02,length_median=5.94890500e-02,length_95%HPD={4.90062900e-02,7.03460700e-
02}],2[&prob=1.00000000e+00,prob_stddev=0.00000000e+00,prob_range={1.00000000e+00,1.00000000e+0
0},prob(percent)="100",prob+-sd="100+-0"]:1.999766e-01[&length_mean=2.00505419e-
01,length_median=1.99976600e-01,length_95%HPD={1.80051800e-01,2.22492800e-
01}],(((((((3[&prob=1.00000000e+00,prob_stddev=0.00000000e+00,prob_range={1.00000000e+00,1.0000
0000e+00},prob(percent)="100",prob+-sd="100+-0"]:4.253277e-03[&length_mean=4.27949119e-
03,length_median=4.25327700e-03,length_95%HPD={3.17555200e-03,5.39201100e-
03}],(180[&prob=1.00000000e+00,prob_stddev=0.00000000e+00,prob_range={1.00000000e+00,1.00000000
e+00},prob(percent)="100",prob+-sd="100+-0"]:2.437743e-03[&length_mean=2.46195774e-
03,length_median=2.43774300e-03,length_95%HPD={1.60018700e-03,3.34108200e-
03}],181[&prob=1.00000000e+00,prob_stddev=0.00000000e+00,prob_range={1.00000000e+00,1.00000000e
+00},prob(percent)="100",prob+-sd="100+-0"]:3.105919e-03[&length_mean=3.13059350e-
03,length_median=3.10591900e-03,length_95%HPD={2.21661800e-03,4.13694700e-
03}]))[&prob=8.69617384e-01,prob_stddev=4.14780674e-03,prob_range={8.66684442e-01,8.72550327e-
01},prob(percent)="87",prob+-sd="87+-0"]:2.799851e-04[&length_mean=3.02671934e-
04,length_median=2.79985100e-04,length_95%HPD={2.06496400e-05,6.24492900e-
04}]))[&prob=1.00000000e+00,prob_stddev=0.00000000e+00,prob_range={1.00000000e+00,1.00000000e+00
},prob(percent)="100",prob+-sd="100+-0"]:1.239764e-03[&length_mean=1.26940781e-
03,length_median=1.23976400e-03,length_95%HPD={6.86604300e-04,1.92431200e-
03}],((31[&prob=1.00000000e+00,prob_stddev=0.00000000e+00,prob_range={1.00000000e+00,1.00000000
e+00},prob(percent)="100",prob+-sd="100+-0"]:2.120319e-03[&length_mean=2.15137487e-
03,length_median=2.12031900e-03,length_95%HPD={1.39485100e-03,2.98218600e-
03}],32[&prob=1.00000000e+00,prob_stddev=0.00000000e+00,prob_range={1.00000000e+00,1.00000000e+
00},prob(percent)="100",prob+-sd="100+-0"]:2.410740e-03[&length_mean=2.44088598e-
03,length_median=2.41074000e-03,length_95%HPD={1.63931100e-03,3.29680900e-
03}]))[&prob=1.00000000e+00,prob_stddev=0.00000000e+00,prob_range={1.00000000e+00,1.00000000e+00
},prob(percent)="100",prob+-sd="100+-0"]:1.788525e-03[&length_mean=1.81247383e-

```

03,length\_median=1.78852500e-03,length\_95%HPD={1.14795200e-03,2.62484700e-03},160[&prob=1.00000000e+00,prob\_stddev=0.00000000e+00,prob\_range={1.00000000e+00,1.00000000e+00},prob(percent)="100",prob+-sd="100+-0"]:3.060110e-03[&length\_mean=3.07528776e-03,length\_median=3.06011000e-03,length\_95%HPD={2.19788800e-03,4.05835500e-03}]]&prob=9.47473670e-01,prob\_stddev=9.80390684e-03,prob\_range={9.40541261e-01,9.54406079e-01},prob(percent)="95",prob+-sd="95+-1":2.451347e-04[&length\_mean=2.69301000e-04,length\_median=2.45134700e-04,length\_95%HPD={1.67921400e-05,5.72506900e-04}],((96[&prob=1.00000000e+00,prob\_stddev=0.00000000e+00,prob\_range={1.00000000e+00,1.00000000e+00},prob(percent)="100",prob+-sd="100+-0"]:4.812089e-04[&length\_mean=5.07976159e-04,length\_median=4.81208900e-04,length\_95%HPD={1.59314300e-04,8.80030000e-04}],98[&prob=1.00000000e+00,prob\_stddev=0.00000000e+00,prob\_range={1.00000000e+00,1.00000000e+00},prob(percent)="100",prob+-sd="100+-0"]:1.974363e-04[&length\_mean=2.17995697e-04,length\_median=1.97436300e-04,length\_95%HPD={2.00542600e-05,4.57486500e-04}]]&prob=9.60471937e-01,prob\_stddev=9.42683350e-05,prob\_range={9.60405279e-01,9.60538595e-01},prob(percent)="96",prob+-sd="96+-0":1.228449e-04[&length\_mean=1.46042889e-04,length\_median=1.22844900e-04,length\_95%HPD={2.50929000e-07,3.46038600e-04}],97[&prob=1.00000000e+00,prob\_stddev=0.00000000e+00,prob\_range={1.00000000e+00,1.00000000e+00},prob(percent)="100",prob+-sd="100+-0"]:3.452784e-04[&length\_mean=3.68818266e-04,length\_median=3.45278400e-04,length\_95%HPD={9.21530100e-05,6.89149400e-04}]]&prob=1.00000000e+00,prob\_stddev=0.00000000e+00,prob\_range={1.00000000e+00,1.00000000e+00},prob(percent)="100",prob+-sd="100+-0":8.604681e-04[&length\_mean=8.81795019e-04,length\_median=8.60468100e-04,length\_95%HPD={4.21024800e-04,1.40360300e-03}],99[&prob=1.00000000e+00,prob\_stddev=0.00000000e+00,prob\_range={1.00000000e+00,1.00000000e+00},prob(percent)="100",prob+-sd="100+-0"]:1.959275e-03[&length\_mean=1.98988042e-03,length\_median=1.95927500e-03,length\_95%HPD={1.25901700e-03,2.74834700e-03}]]&prob=1.00000000e+00,prob\_stddev=0.00000000e+00,prob\_range={1.00000000e+00,1.00000000e+00},prob(percent)="100",prob+-sd="100+-0":8.548095e-04[&length\_mean=8.80079746e-04,length\_median=8.54809500e-04,length\_95%HPD={4.13228300e-04,1.37737600e-03}]]&prob=5.82122384e-01,prob\_stddev=7.82427181e-03,prob\_range={5.76589788e-01,5.87654979e-01},prob(percent)="58",prob+-sd="58+-1":9.799095e-05[&length\_mean=1.22681091e-04,length\_median=9.79909500e-05,length\_95%HPD={2.01561500e-08,3.18652300e-04}]]&prob=1.00000000e+00,prob\_stddev=0.00000000e+00,prob\_range={1.00000000e+00,1.00000000e+00},prob(percent)="100",prob+-sd="100+-0":1.001524e-03[&length\_mean=1.02370421e-03,length\_median=1.00152400e-03,length\_95%HPD={5.00952900e-04,1.57957400e-03}],((30[&prob=1.00000000e+00,prob\_stddev=0.00000000e+00,prob\_range={1.00000000e+00,1.00000000e+00},prob(percent)="100",prob+-sd="100+-0"]:2.027437e-03[&length\_mean=2.05702698e-03,length\_median=2.02743700e-03,length\_95%HPD={1.27781300e-03,2.81841900e-03}],178[&prob=1.00000000e+00,prob\_stddev=0.00000000e+00,prob\_range={1.00000000e+00,1.00000000e+00},prob(percent)="100",prob+-sd="100+-0"]:1.361507e-03[&length\_mean=1.39542418e-03,length\_median=1.36150700e-03,length\_95%HPD={8.12347400e-04,2.05782900e-03}]]&prob=1.00000000e+00,prob\_stddev=0.00000000e+00,prob\_range={1.00000000e+00,1.00000000e+00},prob(percent)="100",prob+-sd="100+-0":9.258169e-04[&length\_mean=9.54630802e-04,length\_median=9.25816900e-04,length\_95%HPD={4.69690600e-04,1.50163100e-03}],86[&prob=1.00000000e+00,prob\_stddev=0.00000000e+00,prob\_range={1.00000000e+00,1.00000000e+00},prob(percent)="100",prob+-sd="100+-0"]:2.475825e-03[&length\_mean=2.50161996e-03,length\_median=2.47582500e-03,length\_95%HPD={1.67562100e-03,3.37881800e-03}]]&prob=1.00000000e+00,prob\_stddev=0.00000000e+00,prob\_range={1.00000000e+00,1.00000000e+00},prob(percent)="100",prob+-sd="100+-0":6.149051e-04[&length\_mean=6.40673887e-04,length\_median=6.14905100e-04,length\_95%HPD={2.46348200e-04,1.09100700e-03}],((((50[&prob=1.00000000e+00,prob\_stddev=0.00000000e+00,prob\_range={1.00000000e+00,1.00000000e+00},prob(percent)="100",prob+-sd="100+-0"]:1.203853e-03[&length\_mean=1.22624180e-03,length\_median=1.20385300e-03,length\_95%HPD={6.71546000e-04,1.83703700e-03}],54[&prob=1.00000000e+00,prob\_stddev=0.00000000e+00,prob\_range={1.00000000e+00,1.00000000e+00},prob(percent)="100",prob+-sd="100+-0"]:1.282461e-04[&length\_mean=1.52190340e-04,length\_median=1.28246100e-04,length\_95%HPD={3.26526700e-06,3.63419300e-04}]]&prob=8.23623517e-01,prob\_stddev=1.82880570e-02,prob\_range={8.10691908e-01,8.36555126e-01},prob(percent)="82",prob+-sd="82+-2":1.830740e-04[&length\_mean=2.09822833e-04,length\_median=1.83074000e-04,length\_95%HPD={1.15009300e-05,4.65325600e-04}],52[&prob=1.00000000e+00,prob\_stddev=0.00000000e+00,prob\_range={1.00000000e+00,1.00000000e+00},prob(percent)="100",prob+-sd="100+-0":1.028820e-03[&length\_mean=1.05395759e-

03,length\_median=1.02882000e-03,length\_95%HPD={5.27521100e-04,1.59912000e-03}][&prob=1.00000000e+00,prob\_stddev=0.00000000e+00,prob\_range={1.00000000e+00,1.00000000e+00},prob(percent)="100",prob+-sd="100+-0"]:1.529367e-03[&length\_mean=1.55060875e-03,length\_median=1.52936700e-03,length\_95%HPD={9.38827600e-04,2.22666200e-03}],53[&prob=1.00000000e+00,prob\_stddev=0.00000000e+00,prob\_range={1.00000000e+00,1.00000000e+00},prob(percent)="100",prob+-sd="100+-0"]:2.537373e-03[&length\_mean=2.56733920e-03,length\_median=2.53737300e-03,length\_95%HPD={1.73591800e-03,3.47699900e-03}][&prob=3.33888815e-01,prob\_stddev=7.25866180e-03,prob\_range={3.28756166e-01,3.39021464e-01},prob(percent)="33",prob+-sd="33+-1"]:4.867450e-05[&length\_mean=7.32278071e-05,length\_median=4.86745000e-05,length\_95%HPD={1.20965900e-08,2.22520500e-04}],51[&prob=1.00000000e+00,prob\_stddev=0.00000000e+00,prob\_range={1.00000000e+00,1.00000000e+00},prob(percent)="100",prob+-sd="100+-0"]:1.657572e-03[&length\_mean=1.67383034e-03,length\_median=1.65757200e-03,length\_95%HPD={1.00632500e-03,2.35479400e-03}][&prob=1.00000000e+00,prob\_stddev=0.00000000e+00,prob\_range={1.00000000e+00,1.00000000e+00},prob(percent)="100",prob+-sd="100+-0"]:1.911948e-03[&length\_mean=1.93018088e-03,length\_median=1.91194800e-03,length\_95%HPD={1.19024600e-03,2.68817500e-03}],143[&prob=1.00000000e+00,prob\_stddev=0.00000000e+00,prob\_range={1.00000000e+00,1.00000000e+00},prob(percent)="100",prob+-sd="100+-0"]:5.036989e-03[&length\_mean=5.06036592e-03,length\_median=5.03698900e-03,length\_95%HPD={3.84761900e-03,6.25093100e-03}][&prob=9.20143981e-01,prob\_stddev=3.20512339e-03,prob\_range={9.17877616e-01,9.22410345e-01},prob(percent)="92",prob+-sd="92+-0"]:2.431076e-04[&length\_mean=2.67262388e-04,length\_median=2.43107600e-04,length\_95%HPD={2.56300300e-05,5.70725100e-04}],((168[&prob=1.00000000e+00,prob\_stddev=0.00000000e+00,prob\_range={1.00000000e+00,1.00000000e+00},prob(percent)="100",prob+-sd="100+-0"]:2.100805e-04[&length\_mean=2.35710271e-04,length\_median=2.10080500e-04,length\_95%HPD={2.88036600e-05,5.06570900e-04}],(169[&prob=1.00000000e+00,prob\_stddev=0.00000000e+00,prob\_range={1.00000000e+00,1.00000000e+00},prob(percent)="100",prob+-sd="100+-0"]:6.096573e-04[&length\_mean=6.37775217e-04,length\_median=6.09657300e-04,length\_95%HPD={2.33266000e-04,1.06340200e-03}],173[&prob=1.00000000e+00,prob\_stddev=0.00000000e+00,prob\_range={1.00000000e+00,1.00000000e+00},prob(percent)="100",prob+-sd="100+-0"]:6.544207e-04[&length\_mean=6.84372464e-04,length\_median=6.54420700e-04,length\_95%HPD={2.80948400e-04,1.13342400e-03}][&prob=7.11105186e-01,prob\_stddev=3.20512339e-03,prob\_range={7.08838821e-01,7.13371550e-01},prob(percent)="71",prob+-sd="71+-0"]:1.198661e-04[&length\_mean=1.43554205e-04,length\_median=1.19866100e-04,length\_95%HPD={6.40225700e-08,3.40947300e-04}][&prob=1.00000000e+00,prob\_stddev=0.00000000e+00,prob\_range={1.00000000e+00,1.00000000e+00},prob(percent)="100",prob+-sd="100+-0"]:8.386947e-04[&length\_mean=8.61342872e-04,length\_median=8.38694700e-04,length\_95%HPD={3.96416100e-04,1.38267200e-03}],(170[&prob=1.00000000e+00,prob\_stddev=0.00000000e+00,prob\_range={1.00000000e+00,1.00000000e+00},prob(percent)="100",prob+-sd="100+-0"]:4.145035e-04[&length\_mean=4.37894449e-04,length\_median=4.14503500e-04,length\_95%HPD={1.21044300e-04,7.89598100e-04}],171[&prob=1.00000000e+00,prob\_stddev=0.00000000e+00,prob\_range={1.00000000e+00,1.00000000e+00},prob(percent)="100",prob+-sd="100+-0"]:1.205043e-04[&length\_mean=1.44334432e-04,length\_median=1.20504300e-04,length\_95%HPD={3.97461100e-07,3.51039400e-04}][&prob=1.00000000e+00,prob\_stddev=0.00000000e+00,prob\_range={1.00000000e+00,1.00000000e+00},prob(percent)="100",prob+-sd="100+-0"]:1.224518e-03[&length\_mean=1.25506040e-03,length\_median=1.22451800e-03,length\_95%HPD={6.77485700e-04,1.85652400e-03}][&prob=6.41381149e-01,prob\_stddev=9.61537017e-03,prob\_range={6.34582056e-01,6.48180243e-01},prob(percent)="64",prob+-sd="64+-1"]:1.050345e-04[&length\_mean=1.30302341e-04,length\_median=1.05034500e-04,length\_95%HPD={5.73971800e-08,3.30596100e-04}],172[&prob=1.00000000e+00,prob\_stddev=0.00000000e+00,prob\_range={1.00000000e+00,1.00000000e+00},prob(percent)="100",prob+-sd="100+-0"]:1.914947e-03[&length\_mean=1.93691317e-03,length\_median=1.91494700e-03,length\_95%HPD={1.21433600e-03,2.71060600e-03}][&prob=1.00000000e+00,prob\_stddev=0.00000000e+00,prob\_range={1.00000000e+00,1.00000000e+00},prob(percent)="100",prob+-sd="100+-0"]:1.794562e-03[&length\_mean=1.82337699e-03,length\_median=1.79456200e-03,length\_95%HPD={1.11153000e-03,2.54468500e-03}][&prob=1.00000000e+00,prob\_stddev=0.00000000e+00,prob\_range={1.00000000e+00,1.00000000e+00},prob(percent)="100",prob+-sd="100+-0"]:4.764821e-04[&length\_mean=4.98428690e-04,length\_median=4.76482100e-04,length\_95%HPD={1.53243900e-04,8.90499900e-04}][&prob=9.78736169e-01,prob\_stddev=6.59878345e-04,prob\_range={9.78269564e-01,9.79202773e-01},prob(percent)="98",prob+-sd="98+-0"]:1.892316e-04[&length\_mean=2.13968672e-

04,length\_median=1.89231600e-04,length\_95%HPD={1.36087700e-05,4.67066700e-04}][&prob=1.00000000e+00,prob\_stddev=0.00000000e+00,prob\_range={1.00000000e+00,1.00000000e+00},prob(percent)="100",prob+-sd="100+-0"]:1.169201e-03[&length\_mean=1.19261207e-03,length\_median=1.16920100e-03,length\_95%HPD={6.25158900e-04,1.80625100e-03}],((78[&prob=1.00000000e+00,prob\_stddev=0.00000000e+00,prob\_range={1.00000000e+00,1.00000000e+00},prob(percent)="100",prob+-sd="100+-0"]:2.264137e-03[&length\_mean=2.28949588e-03,length\_median=2.26413700e-03,length\_95%HPD={1.51003600e-03,3.17359400e-03}],(81[&prob=1.00000000e+00,prob\_stddev=0.00000000e+00,prob\_range={1.00000000e+00,1.00000000e+00},prob(percent)="100",prob+-sd="100+-0"]:1.770174e-03[&length\_mean=1.79400117e-03,length\_median=1.77017400e-03,length\_95%HPD={1.08339800e-03,2.55533200e-03}],((82[&prob=1.00000000e+00,prob\_stddev=0.00000000e+00,prob\_range={1.00000000e+00,1.00000000e+00},prob(percent)="100",prob+-sd="100+-0"]:6.259915e-04[&length\_mean=6.53718825e-04,length\_median=6.25991500e-04,length\_95%HPD={2.68616700e-04,1.09886300e-03}],83[&prob=1.00000000e+00,prob\_stddev=0.00000000e+00,prob\_range={1.00000000e+00,1.00000000e+00},prob(percent)="100",prob+-sd="100+-0"]:7.036254e-04[&length\_mean=7.30371194e-04,length\_median=7.03625400e-04,length\_95%HPD={3.09993400e-04,1.17453800e-03}][&prob=9.97600320e-01,prob\_stddev=1.69683003e-03,prob\_range={9.96400480e-01,9.98800160e-01},prob(percent)="100",prob+-sd="100+-0"]:1.908273e-04[&length\_mean=2.15262300e-04,length\_median=1.90827300e-04,length\_95%HPD={1.87932500e-05,4.62366200e-04}],85[&prob=1.00000000e+00,prob\_stddev=0.00000000e+00,prob\_range={1.00000000e+00,1.00000000e+00},prob(percent)="100",prob+-sd="100+-0"]:7.866077e-04[&length\_mean=8.08419589e-04,length\_median=7.86607700e-04,length\_95%HPD={3.77841700e-04,1.30395000e-03}][&prob=1.00000000e+00,prob\_stddev=0.00000000e+00,prob\_range={1.00000000e+00,1.00000000e+00},prob(percent)="100",prob+-sd="100+-0"]:3.629118e-04[&length\_mean=3.88862378e-04,length\_median=3.62911800e-04,length\_95%HPD={9.65178300e-05,7.26330600e-04}][&prob=5.29929343e-01,prob\_stddev=6.78732012e-03,prob\_range={5.25129983e-01,5.34728703e-01},prob(percent)="53",prob+-sd="53+-1"]:1.223724e-04[&length\_mean=1.45033271e-04,length\_median=1.22372400e-04,length\_95%HPD={1.01388200e-06,3.49629200e-04}][&prob=9.95267298e-01,prob\_stddev=2.82805005e-04,prob\_range={9.95067324e-01,9.95467271e-01},prob(percent)="100",prob+-sd="100+-0"]:2.088735e-04[&length\_mean=2.32245405e-04,length\_median=2.08873500e-04,length\_95%HPD={1.50956900e-05,4.98461800e-04}],((79[&prob=1.00000000e+00,prob\_stddev=0.00000000e+00,prob\_range={1.00000000e+00,1.00000000e+00},prob(percent)="100",prob+-sd="100+-0"]:5.239690e-04[&length\_mean=5.46306100e-04,length\_median=5.23969000e-04,length\_95%HPD={1.89273000e-04,9.29382700e-04}],80[&prob=1.00000000e+00,prob\_stddev=0.00000000e+00,prob\_range={1.00000000e+00,1.00000000e+00},prob(percent)="100",prob+-sd="100+-0"]:5.954780e-04[&length\_mean=6.17601694e-04,length\_median=5.95478000e-04,length\_95%HPD={2.42971500e-04,1.06176300e-03}][&prob=1.00000000e+00,prob\_stddev=0.00000000e+00,prob\_range={1.00000000e+00,1.00000000e+00},prob(percent)="100",prob+-sd="100+-0"]:5.522307e-04[&length\_mean=5.78242499e-04,length\_median=5.52230700e-04,length\_95%HPD={2.04533700e-04,9.78749900e-04}],84[&prob=1.00000000e+00,prob\_stddev=0.00000000e+00,prob\_range={1.00000000e+00,1.00000000e+00},prob(percent)="100",prob+-sd="100+-0"]:1.334672e-03[&length\_mean=1.35066987e-03,length\_median=1.33467200e-03,length\_95%HPD={7.56673400e-04,1.95874000e-03}][&prob=1.00000000e+00,prob\_stddev=0.00000000e+00,prob\_range={1.00000000e+00,1.00000000e+00},prob(percent)="100",prob+-sd="100+-0"]:1.334503e-03[&length\_mean=1.36159113e-03,length\_median=1.33450300e-03,length\_95%HPD={7.96829100e-04,2.02644600e-03}][&prob=1.00000000e+00,prob\_stddev=0.00000000e+00,prob\_range={1.00000000e+00,1.00000000e+00},prob(percent)="100",prob+-sd="100+-0"]:2.219184e-03[&length\_mean=2.24669799e-03,length\_median=2.21918400e-03,length\_95%HPD={1.48349800e-03,3.09553700e-03}][&prob=1.00000000e+00,prob\_stddev=0.00000000e+00,prob\_range={1.00000000e+00,1.00000000e+00},prob(percent)="100",prob+-sd="100+-0"]:1.878123e-03[&length\_mean=1.90259141e-03,length\_median=1.87812300e-03,length\_95%HPD={1.05648800e-03,2.72793600e-03}],(136[&prob=1.00000000e+00,prob\_stddev=0.00000000e+00,prob\_range={1.00000000e+00,1.00000000e+00},prob(percent)="100",prob+-sd="100+-0"]:4.745053e-03[&length\_mean=4.77549919e-03,length\_median=4.74505300e-03,length\_95%HPD={3.58216700e-03,5.97486100e-03}],(((146[&prob=1.00000000e+00,prob\_stddev=0.00000000e+00,prob\_range={1.00000000e+00,1.00000000e+00},prob(percent)="100",prob+-sd="100+-0"]:4.860256e-04[&length\_mean=5.09511242e-04,length\_median=4.86025600e-04,length\_95%HPD={1.75633600e-04,8.95788600e-04}],147[&prob=1.00000000e+00,prob\_stddev=0.00000000e+00,prob\_range={1.00000000e+00,1.00000000e+00},prob(percent)="100",prob+-sd="100+-0"]:7.826375e-04[&length\_mean=8.01678245e-

04,length\_median=7.82637500e-04,length\_95%HPD={3.67721100e-04,1.27453900e-03}][&prob=1.00000000e+00,prob\_stddev=0.00000000e+00,prob\_range={1.00000000e+00,1.00000000e+00},prob(percent)="100",prob+-sd="100+-0"]:7.840609e-04[&length\_mean=8.04900965e-04,length\_median=7.84060900e-04,length\_95%HPD={3.80622100e-04,1.29715500e-03}],(150[&prob=1.00000000e+00,prob\_stddev=0.00000000e+00,prob\_range={1.00000000e+00,1.00000000e+00},prob(percent)="100",prob+-sd="100+-0"]:5.570181e-04[&length\_mean=5.81148443e-04,length\_median=5.57018100e-04,length\_95%HPD={2.19335600e-04,9.94578000e-04}],151[&prob=1.00000000e+00,prob\_stddev=0.00000000e+00,prob\_range={1.00000000e+00,1.00000000e+00},prob(percent)="100",prob+-sd="100+-0"]:4.124310e-04[&length\_mean=4.35194290e-04,length\_median=4.12431000e-04,length\_95%HPD={1.28282500e-04,7.87301300e-04}][&prob=1.00000000e+00,prob\_stddev=0.00000000e+00,prob\_range={1.00000000e+00,1.00000000e+00},prob(percent)="100",prob+-sd="100+-0"]:7.891887e-04[&length\_mean=8.09361206e-04,length\_median=7.89188700e-04,length\_95%HPD={3.60211600e-04,1.29351700e-03}][&prob=9.99466738e-01,prob\_stddev=5.65610010e-04,prob\_range={9.99066791e-01,9.99866684e-01},prob(percent)="100",prob+-sd="100+-0"]:2.701073e-04[&length\_mean=2.95293291e-04,length\_median=2.70107300e-04,length\_95%HPD={4.6158100e-05,5.88369000e-04}],(154[&prob=1.00000000e+00,prob\_stddev=0.00000000e+00,prob\_range={1.00000000e+00,1.00000000e+00},prob(percent)="100",prob+-sd="100+-0"]:3.256738e-04[&length\_mean=3.48708306e-04,length\_median=3.25673800e-04,length\_95%HPD={5.19802400e-05,6.76242100e-04}],155[&prob=1.00000000e+00,prob\_stddev=0.00000000e+00,prob\_range={1.00000000e+00,1.00000000e+00},prob(percent)="100",prob+-sd="100+-0"]:2.792111e-03[&length\_mean=2.80495485e-03,length\_median=2.79211100e-03,length\_95%HPD={1.92526800e-03,3.71746900e-03}][&prob=1.00000000e+00,prob\_stddev=0.00000000e+00,prob\_range={1.00000000e+00,1.00000000e+00},prob(percent)="100",prob+-sd="100+-0"]:1.838428e-03[&length\_mean=1.86161241e-03,length\_median=1.83842800e-03,length\_95%HPD={1.14399900e-03,2.61832600e-03}][&prob=1.00000000e+00,prob\_stddev=0.00000000e+00,prob\_range={1.00000000e+00,1.00000000e+00},prob(percent)="100",prob+-sd="100+-0"]:5.681230e-04[&length\_mean=5.95123497e-04,length\_median=5.68123000e-04,length\_95%HPD={2.08155400e-04,1.04519700e-03}],(148[&prob=1.00000000e+00,prob\_stddev=0.00000000e+00,prob\_range={1.00000000e+00,1.00000000e+00},prob(percent)="100",prob+-sd="100+-0"]:6.186478e-04[&length\_mean=6.42509507e-04,length\_median=6.18647800e-04,length\_95%HPD={2.29010400e-04,1.07809300e-03}],149[&prob=1.00000000e+00,prob\_stddev=0.00000000e+00,prob\_range={1.00000000e+00,1.00000000e+00},prob(percent)="100",prob+-sd="100+-0"]:4.991415e-04[&length\_mean=5.20812761e-04,length\_median=4.99141500e-04,length\_95%HPD={1.49307100e-04,8.95893500e-04}][&prob=1.00000000e+00,prob\_stddev=0.00000000e+00,prob\_range={1.00000000e+00,1.00000000e+00},prob(percent)="100",prob+-sd="100+-0"]:9.119477e-04[&length\_mean=9.40010046e-04,length\_median=9.11947700e-04,length\_95%HPD={4.51670600e-04,1.45924400e-03}][&prob=1.00000000e+00,prob\_stddev=0.00000000e+00,prob\_range={1.00000000e+00,1.00000000e+00},prob(percent)="100",prob+-sd="100+-0"]:8.565643e-04[&length\_mean=8.82788164e-04,length\_median=8.56564300e-04,length\_95%HPD={3.94660600e-04,1.42751400e-03}],(152[&prob=1.00000000e+00,prob\_stddev=0.00000000e+00,prob\_range={1.00000000e+00,1.00000000e+00},prob(percent)="100",prob+-sd="100+-0"]:9.242439e-04[&length\_mean=9.47235593e-04,length\_median=9.24243900e-04,length\_95%HPD={4.82499700e-04,1.48567700e-03}],153[&prob=1.00000000e+00,prob\_stddev=0.00000000e+00,prob\_range={1.00000000e+00,1.00000000e+00},prob(percent)="100",prob+-sd="100+-0"]:9.268317e-04[&length\_mean=9.51625350e-04,length\_median=9.26831700e-04,length\_95%HPD={4.52154600e-04,1.49031300e-03}][&prob=1.00000000e+00,prob\_stddev=0.00000000e+00,prob\_range={1.00000000e+00,1.00000000e+00},prob(percent)="100",prob+-sd="100+-0"]:1.716002e-03[&length\_mean=1.74227080e-03,length\_median=1.71600200e-03,length\_95%HPD={1.03691800e-03,2.48821000e-03}][&prob=1.00000000e+00,prob\_stddev=0.00000000e+00,prob\_range={1.00000000e+00,1.00000000e+00},prob(percent)="100",prob+-sd="100+-0"]:1.170323e-03[&length\_mean=1.19891675e-03,length\_median=1.17032300e-03,length\_95%HPD={5.71813300e-04,1.83908300e-03}][&prob=1.00000000e+00,prob\_stddev=0.00000000e+00,prob\_range={1.00000000e+00,1.00000000e+00},prob(percent)="100",prob+-sd="100+-0"]:3.230891e-03[&length\_mean=3.26165741e-03,length\_median=3.23089100e-03,length\_95%HPD={2.21830900e-03,4.31566400e-03}][&prob=1.00000000e+00,prob\_stddev=0.00000000e+00,prob\_range={1.00000000e+00,1.00000000e+00},prob(percent)="100",prob+-sd="100+-0"]:5.502887e-03[&length\_mean=5.54644005e-03,length\_median=5.50288700e-03,length\_95%HPD={3.93903800e-03,7.27625000e-03}],(73[&prob=1.00000000e+00,prob\_stddev=0.00000000e+00,prob\_range={1.00000000e+00,1.00000000e+00},prob(percent)="100",prob+-sd="100+-0"]:3.168409e-02[&length\_mean=3.17811641e-

02,length\_median=3.16840900e-02,length\_95%HPD={2.74840500e-02,3.59438200e-02}],186[&prob=1.00000000e+00,prob\_stddev=0.00000000e+00,prob\_range={1.00000000e+00,1.00000000e+00},prob(percent)="100",prob+-sd="100+-0"]:1.175921e-02[&length\_mean=1.17515171e-02,length\_median=1.17592100e-02,length\_95%HPD={9.14288400e-03,1.43580700e-02}]]&prob=9.91934409e-01,prob\_stddev=4.24207508e-03,prob\_range={9.88934809e-01,9.94934009e-01},prob(percent)="99",prob+-sd="99+-0":2.854856e-03[&length\_mean=2.89049847e-03,length\_median=2.85485600e-03,length\_95%HPD={1.17494500e-03,4.68238100e-03}]]&prob=1.00000000e+00,prob\_stddev=0.00000000e+00,prob\_range={1.00000000e+00,1.00000000e+00},prob(percent)="100",prob+-sd="100+-0":1.398000e-02[&length\_mean=1.40484769e-02,length\_median=1.39800000e-02,length\_95%HPD={1.12264200e-02,1.66958700e-02}],(174[&prob=1.00000000e+00,prob\_stddev=0.00000000e+00,prob\_range={1.00000000e+00,1.00000000e+00},prob(percent)="100",prob+-sd="100+-0"]:8.608344e-03[&length\_mean=8.62126836e-03,length\_median=8.60834400e-03,length\_95%HPD={6.71823700e-03,1.06837500e-02}],175[&prob=1.00000000e+00,prob\_stddev=0.00000000e+00,prob\_range={1.00000000e+00,1.00000000e+00},prob(percent)="100",prob+-sd="100+-0"]:8.715117e-03[&length\_mean=8.75000717e-03,length\_median=8.71511700e-03,length\_95%HPD={6.71905700e-03,1.08184100e-02}]]&prob=1.00000000e+00,prob\_stddev=0.00000000e+00,prob\_range={1.00000000e+00,1.00000000e+00},prob(percent)="100",prob+-sd="100+-0":2.856608e-02[&length\_mean=2.86135942e-02,length\_median=2.85660800e-02,length\_95%HPD={2.47056800e-02,3.23474700e-02}]]&prob=9.97933609e-01,prob\_stddev=9.42683350e-05,prob\_range={9.97866951e-01,9.98000267e-01},prob(percent)="100",prob+-sd="100+-0":3.191706e-03[&length\_mean=3.2332347e-03,length\_median=3.19170600e-03,length\_95%HPD={1.44930100e-03,5.07565600e-03}],(((8[&prob=1.00000000e+00,prob\_stddev=0.00000000e+00,prob\_range={1.00000000e+00,1.00000000e+00},prob(percent)="100",prob+-sd="100+-0"]:9.800841e-03[&length\_mean=9.84493597e-03,length\_median=9.80084100e-03,length\_95%HPD={7.94252400e-03,1.17854500e-02}],(145[&prob=1.00000000e+00,prob\_stddev=0.00000000e+00,prob\_range={1.00000000e+00,1.00000000e+00},prob(percent)="100",prob+-sd="100+-0"]:2.928924e-03[&length\_mean=2.96124717e-03,length\_median=2.92892400e-03,length\_95%HPD={1.96279300e-03,3.96237700e-03}],((156[&prob=1.00000000e+00,prob\_stddev=0.00000000e+00,prob\_range={1.00000000e+00,1.00000000e+00},prob(percent)="100",prob+-sd="100+-0"]:2.017068e-03[&length\_mean=2.04050513e-03,length\_median=2.01706800e-03,length\_95%HPD={1.28701300e-03,2.85436700e-03}],157[&prob=1.00000000e+00,prob\_stddev=0.00000000e+00,prob\_range={1.00000000e+00,1.00000000e+00},prob(percent)="100",prob+-sd="100+-0":9.466500e-04[&length\_mean=9.75981923e-04,length\_median=9.46650000e-04,length\_95%HPD={4.22471500e-04,1.55492900e-03}]]&prob=1.00000000e+00,prob\_stddev=0.00000000e+00,prob\_range={1.00000000e+00,1.00000000e+00},prob(percent)="100",prob+-sd="100+-0":1.071075e-03[&length\_mean=1.09670924e-03,length\_median=1.07107500e-03,length\_95%HPD={5.30779900e-04,1.69543400e-03}],158[&prob=1.00000000e+00,prob\_stddev=0.00000000e+00,prob\_range={1.00000000e+00,1.00000000e+00},prob(percent)="100",prob+-sd="100+-0":4.350871e-03[&length\_mean=4.37606825e-03,length\_median=4.35087100e-03,length\_95%HPD={3.20494200e-03,5.54861000e-03}]]&prob=1.00000000e+00,prob\_stddev=0.00000000e+00,prob\_range={1.00000000e+00,1.00000000e+00},prob(percent)="100",prob+-sd="100+-0":3.225086e-03[&length\_mean=3.25240457e-03,length\_median=3.22508600e-03,length\_95%HPD={2.22628600e-03,4.34204600e-03}]]&prob=1.00000000e+00,prob\_stddev=0.00000000e+00,prob\_range={1.00000000e+00,1.00000000e+00},prob(percent)="100",prob+-sd="100+-0":5.686670e-03[&length\_mean=5.71158232e-03,length\_median=5.68667000e-03,length\_95%HPD={4.22039500e-03,7.18944200e-03}]]&prob=1.00000000e+00,prob\_stddev=0.00000000e+00,prob\_range={1.00000000e+00,1.00000000e+00},prob(percent)="100",prob+-sd="100+-0":1.096540e-02[&length\_mean=1.09979714e-02,length\_median=1.09654000e-02,length\_95%HPD={8.82421000e-03,1.31518700e-02}],(((33[&prob=1.00000000e+00,prob\_stddev=0.00000000e+00,prob\_range={1.00000000e+00,1.00000000e+00},prob(percent)="100",prob+-sd="100+-0":7.817863e-03[&length\_mean=7.85808265e-03,length\_median=7.81786300e-03,length\_95%HPD={6.34560600e-03,9.65529200e-03}],67[&prob=1.00000000e+00,prob\_stddev=0.00000000e+00,prob\_range={1.00000000e+00,1.00000000e+00},prob(percent)="100",prob+-sd="100+-0":5.312653e-03[&length\_mean=5.33131511e-03,length\_median=5.31265300e-03,length\_95%HPD={3.83167000e-03,6.83192100e-03}]]&prob=9.99933342e-01,prob\_stddev=9.42683350e-05,prob\_range={9.99866684e-01,1.00000000e+00},prob(percent)="100",prob+-sd="100+-0":1.543172e-03[&length\_mean=1.57505004e-03,length\_median=1.54317200e-03,length\_95%HPD={6.95509900e-04,2.55857500e-03}],45[&prob=1.00000000e+00,prob\_stddev=0.00000000e+00,prob\_range={1.00000000e+00,1.00000000e+00},prob(percent)="100",prob+-sd="100+-0":1.072811e-02[&length\_mean=1.07609330e-

02,length\_median=1.07281100e-02,length\_95%HPD={8.87159100e-03,1.27794000e-02}][&prob=1.00000000e+00,prob\_stddev=0.00000000e+00,prob\_range={1.00000000e+00,1.00000000e+00},prob(percent)="100",prob+-sd="100+-0"]:4.794396e-03[&length\_mean=4.83444724e-03,length\_median=4.79439600e-03,length\_95%HPD={3.27243700e-03,6.45268400e-03}],43[&prob=1.00000000e+00,prob\_stddev=0.00000000e+00,prob\_range={1.00000000e+00,1.00000000e+00},prob(percent)="100",prob+-sd="100+-0"]:1.885269e-02[&length\_mean=1.88393771e-02,length\_median=1.88526900e-02,length\_95%HPD={1.59247800e-02,2.15810400e-02}][&prob=1.00000000e+00,prob\_stddev=0.00000000e+00,prob\_range={1.00000000e+00,1.00000000e+00},prob(percent)="100",prob+-sd="100+-0"]:1.018243e-02[&length\_mean=1.02082900e-02,length\_median=1.01824300e-02,length\_95%HPD={8.08570700e-03,1.23817200e-02}][&prob=1.00000000e+00,prob\_stddev=0.00000000e+00,prob\_range={1.00000000e+00,1.00000000e+00},prob(percent)="100",prob+-sd="100+-0"]:3.122010e-03[&length\_mean=3.17565433e-03,length\_median=3.12201000e-03,length\_95%HPD={1.86051300e-03,4.67158200e-03}],((35[&prob=1.00000000e+00,prob\_stddev=0.00000000e+00,prob\_range={1.00000000e+00,1.00000000e+00},prob(percent)="100",prob+-sd="100+-0"]:2.447945e-04[&length\_mean=2.70420582e-04,length\_median=2.44794500e-04,length\_95%HPD={3.63344100e-05,5.60157900e-04}],36[&prob=1.00000000e+00,prob\_stddev=0.00000000e+00,prob\_range={1.00000000e+00,1.00000000e+00},prob(percent)="100",prob+-sd="100+-0"]:2.102620e-04[&length\_mean=2.35778915e-04,length\_median=2.10262000e-04,length\_95%HPD={2.62514900e-05,5.00883900e-04}][&prob=1.00000000e+00,prob\_stddev=0.00000000e+00,prob\_range={1.00000000e+00,1.00000000e+00},prob(percent)="100",prob+-sd="100+-0"]:2.728701e-03[&length\_mean=2.75472017e-03,length\_median=2.72870100e-03,length\_95%HPD={1.82889000e-03,3.69559000e-03}],210[&prob=1.00000000e+00,prob\_stddev=0.00000000e+00,prob\_range={1.00000000e+00,1.00000000e+00},prob(percent)="100",prob+-sd="100+-0"]:4.903488e-03[&length\_mean=4.91252817e-03,length\_median=4.90348800e-03,length\_95%HPD={3.62191100e-03,6.08463600e-03}][&prob=1.00000000e+00,prob\_stddev=0.00000000e+00,prob\_range={1.00000000e+00,1.00000000e+00},prob(percent)="100",prob+-sd="100+-0"]:1.808870e-03[&length\_mean=1.84207663e-03,length\_median=1.80887000e-03,length\_95%HPD={1.05609600e-03,2.73139700e-03}],((211[&prob=1.00000000e+00,prob\_stddev=0.00000000e+00,prob\_range={1.00000000e+00,1.00000000e+00},prob(percent)="100",prob+-sd="100+-0"]:5.615349e-04[&length\_mean=5.83438801e-04,length\_median=5.61534900e-04,length\_95%HPD={2.04740100e-04,9.84923700e-04}],212[&prob=1.00000000e+00,prob\_stddev=0.00000000e+00,prob\_range={1.00000000e+00,1.00000000e+00},prob(percent)="100",prob+-sd="100+-0"]:7.624744e-04[&length\_mean=7.90850351e-04,length\_median=7.62474400e-04,length\_95%HPD={3.56047200e-04,1.29825900e-03}][&prob=7.46300493e-01,prob\_stddev=1.52714703e-02,prob\_range={7.35501933e-01,7.57099053e-01},prob(percent)="75",prob+-sd="75+-2"]:1.814295e-04[&length\_mean=2.05962886e-04,length\_median=1.81429500e-04,length\_95%HPD={3.56404900e-08,4.55758500e-04}],213[&prob=1.00000000e+00,prob\_stddev=0.00000000e+00,prob\_range={1.00000000e+00,1.00000000e+00},prob(percent)="100",prob+-sd="100+-0"]:1.354965e-03[&length\_mean=1.37760192e-03,length\_median=1.35496500e-03,length\_95%HPD={7.80645300e-04,2.05284000e-03}][&prob=1.00000000e+00,prob\_stddev=0.00000000e+00,prob\_range={1.00000000e+00,1.00000000e+00},prob(percent)="100",prob+-sd="100+-0"]:5.643051e-03[&length\_mean=5.68052266e-03,length\_median=5.64305100e-03,length\_95%HPD={4.32157000e-03,7.17139800e-03}][&prob=1.00000000e+00,prob\_stddev=0.00000000e+00,prob\_range={1.00000000e+00,1.00000000e+00},prob(percent)="100",prob+-sd="100+-0"]:7.187127e-03[&length\_mean=7.23829202e-03,length\_median=7.18712700e-03,length\_95%HPD={5.60261200e-03,8.95832000e-03}],(60[&prob=1.00000000e+00,prob\_stddev=0.00000000e+00,prob\_range={1.00000000e+00,1.00000000e+00},prob(percent)="100",prob+-sd="100+-0"]:1.333509e-03[&length\_mean=1.35985255e-03,length\_median=1.33350900e-03,length\_95%HPD={6.52777900e-04,2.04395800e-03}],(61[&prob=1.00000000e+00,prob\_stddev=0.00000000e+00,prob\_range={1.00000000e+00,1.00000000e+00},prob(percent)="100",prob+-sd="100+-0"]:1.239790e-03[&length\_mean=1.26781005e-03,length\_median=1.23979000e-03,length\_95%HPD={6.88181000e-04,1.89625200e-03}],62[&prob=1.00000000e+00,prob\_stddev=0.00000000e+00,prob\_range={1.00000000e+00,1.00000000e+00},prob(percent)="100",prob+-sd="100+-0"]:6.044070e-04[&length\_mean=6.27935890e-04,length\_median=6.04407000e-04,length\_95%HPD={2.53773800e-04,1.09688500e-03}][&prob=1.00000000e+00,prob\_stddev=0.00000000e+00,prob\_range={1.00000000e+00,1.00000000e+00},prob(percent)="100",prob+-sd="100+-0"]:1.321918e-03[&length\_mean=1.34697072e-03,length\_median=1.32191800e-03,length\_95%HPD={7.03893500e-04,2.02923800e-03}][&prob=1.00000000e+00,prob\_stddev=0.00000000e+00,prob\_range={1.00000000e+00,1.00000000e+00},prob(percent)="100",prob+-sd="100+-0"]:1.331166e-02[&length\_mean=1.33581721e-

02,length\_median=1.33116600e-02,length\_95%HPD={1.11588000e-02,1.56421800e-02})]&prob=9.99066791e-01,prob\_stddev=5.65610010e-04,prob\_range={9.98666844e-01,9.99466738e-01},prob(percent)="100",prob+-sd="100+-0":1.674210e-03[&length\_mean=1.71350806e-03,length\_median=1.67421000e-03,length\_95%HPD={6.28417100e-04,2.86114700e-03}]]&prob=1.00000000e+00,prob\_stddev=0.00000000e+00,prob\_range={1.00000000e+00,1.00000000e+00},prob(percent)="100",prob+-sd="100+-0":1.014561e-02[&length\_mean=1.01684900e-02,length\_median=1.01456100e-02,length\_95%HPD={8.09425900e-03,1.24201500e-02}],((((18[&prob=1.00000000e+00,prob\_stddev=0.00000000e+00,prob\_range={1.00000000e+00,1.00000000e+00},prob(percent)="100",prob+-sd="100+-0":1.714958e-03[&length\_mean=1.73650436e-03,length\_median=1.71495800e-03,length\_95%HPD={1.04981300e-03,2.46467500e-03}],71[&prob=1.00000000e+00,prob\_stddev=0.00000000e+00,prob\_range={1.00000000e+00,1.00000000e+00},prob(percent)="100",prob+-sd="100+-0":1.936652e-03[&length\_mean=1.96339488e-03,length\_median=1.93665200e-03,length\_95%HPD={1.24950200e-03,2.73916800e-03}]]&prob=1.00000000e+00,prob\_stddev=0.00000000e+00,prob\_range={1.00000000e+00,1.00000000e+00},prob(percent)="100",prob+-sd="100+-0":1.121005e-03[&length\_mean=1.15036058e-03,length\_median=1.12100500e-03,length\_95%HPD={6.19719900e-04,1.79202200e-03}],((68[&prob=1.00000000e+00,prob\_stddev=0.00000000e+00,prob\_range={1.00000000e+00,1.00000000e+00},prob(percent)="100",prob+-sd="100+-0":2.264310e-03[&length\_mean=2.28494638e-03,length\_median=2.26431000e-03,length\_95%HPD={1.44194400e-03,3.10301600e-03}],(69[&prob=1.00000000e+00,prob\_stddev=0.00000000e+00,prob\_range={1.00000000e+00,1.00000000e+00},prob(percent)="100",prob+-sd="100+-0":1.264107e-03[&length\_mean=1.28673554e-03,length\_median=1.26410700e-03,length\_95%HPD={6.98472700e-04,1.92888500e-03}],70[&prob=1.00000000e+00,prob\_stddev=0.00000000e+00,prob\_range={1.00000000e+00,1.00000000e+00},prob(percent)="100",prob+-sd="100+-0":1.700931e-03[&length\_mean=1.72545075e-03,length\_median=1.70093100e-03,length\_95%HPD={1.07241600e-03,2.48126500e-03}]]&prob=1.00000000e+00,prob\_stddev=0.00000000e+00,prob\_range={1.00000000e+00,1.00000000e+00},prob(percent)="100",prob+-sd="100+-0":1.578023e-03[&length\_mean=1.61014664e-03,length\_median=1.57802300e-03,length\_95%HPD={9.47601400e-04,2.32135400e-03}]]&prob=1.00000000e+00,prob\_stddev=0.00000000e+00,prob\_range={1.00000000e+00,1.00000000e+00},prob(percent)="100",prob+-sd="100+-0":2.925127e-03[&length\_mean=2.93799776e-03,length\_median=2.92512700e-03,length\_95%HPD={2.00916200e-03,3.90115400e-03}],72[&prob=1.00000000e+00,prob\_stddev=0.00000000e+00,prob\_range={1.00000000e+00,1.00000000e+00},prob(percent)="100",prob+-sd="100+-0":3.976558e-03[&length\_mean=3.99627959e-03,length\_median=3.97655800e-03,length\_95%HPD={2.94709500e-03,5.04981100e-03}]]&prob=1.00000000e+00,prob\_stddev=0.00000000e+00,prob\_range={1.00000000e+00,1.00000000e+00},prob(percent)="100",prob+-sd="100+-0":7.093765e-04[&length\_mean=7.35334167e-04,length\_median=7.09376500e-04,length\_95%HPD={2.93497500e-04,1.23951800e-03}]]&prob=9.93334222e-01,prob\_stddev=4.14780674e-03,prob\_range={9.90401280e-01,9.96267164e-01},prob(percent)="99",prob+-sd="99+-0":4.205141e-04[&length\_mean=4.45719307e-04,length\_median=4.20514100e-04,length\_95%HPD={7.71748300e-05,8.40674500e-04}],((21[&prob=1.00000000e+00,prob\_stddev=0.00000000e+00,prob\_range={1.00000000e+00,1.00000000e+00},prob(percent)="100",prob+-sd="100+-0":2.333819e-03[&length\_mean=2.36108590e-03,length\_median=2.33381900e-03,length\_95%HPD={1.55695300e-03,3.24365400e-03}],42[&prob=1.00000000e+00,prob\_stddev=0.00000000e+00,prob\_range={1.00000000e+00,1.00000000e+00},prob(percent)="100",prob+-sd="100+-0":2.598436e-03[&length\_mean=2.62255227e-03,length\_median=2.59843600e-03,length\_95%HPD={1.77636700e-03,3.51407700e-03}]]&prob=1.00000000e+00,prob\_stddev=0.00000000e+00,prob\_range={1.00000000e+00,1.00000000e+00},prob(percent)="100",prob+-sd="100+-0":5.739461e-04[&length\_mean=5.97858615e-04,length\_median=5.73946100e-04,length\_95%HPD={1.98007200e-04,1.02589400e-03}],76[&prob=1.00000000e+00,prob\_stddev=0.00000000e+00,prob\_range={1.00000000e+00,1.00000000e+00},prob(percent)="100",prob+-sd="100+-0":3.244509e-03[&length\_mean=3.25546181e-03,length\_median=3.24450900e-03,length\_95%HPD={2.29205900e-03,4.21100000e-03}]]&prob=1.00000000e+00,prob\_stddev=0.00000000e+00,prob\_range={1.00000000e+00,1.00000000e+00},prob(percent)="100",prob+-sd="100+-0":5.126514e-04[&length\_mean=5.39092991e-04,length\_median=5.12651400e-04,length\_95%HPD={1.57137200e-04,9.54063100e-04}],56[&prob=1.00000000e+00,prob\_stddev=0.00000000e+00,prob\_range={1.00000000e+00,1.00000000e+00},prob(percent)="100",prob+-sd="100+-0":3.101158e-03[&length\_mean=3.12329795e-03,length\_median=3.10115800e-03,length\_95%HPD={2.15022000e-03,4.05130000e-03}]]&prob=1.00000000e+00,prob\_stddev=0.00000000e+00,prob\_range={1.00000000e+00,1.00000000e+00},prob(percent)="100",prob+-sd="100+-0":8.460873e-04[&length\_mean=8.75163634e-



04,length\_median=8.46087300e-04,length\_95%HPD={3.85906400e-04,1.44155500e-03}][&prob=1.00000000e+00,prob\_stddev=0.00000000e+00,prob\_range={1.00000000e+00,1.00000000e+00},prob(percent)="100",prob+-sd="100+-0"]:5.343750e-03[&length\_mean=5.37876183e-03,length\_median=5.34375000e-03,length\_95%HPD={3.89002300e-03,6.87965600e-03}],((39[&prob=1.00000000e+00,prob\_stddev=0.00000000e+00,prob\_range={1.00000000e+00,1.00000000e+00},prob(percent)="100",prob+-sd="100+-0"]:3.401635e-03[&length\_mean=3.42758244e-03,length\_median=3.40163500e-03,length\_95%HPD={2.47724400e-03,4.47944800e-03}],66[&prob=1.00000000e+00,prob\_stddev=0.00000000e+00,prob\_range={1.00000000e+00,1.00000000e+00},prob(percent)="100",prob+-sd="100+-0"]:3.900251e-03[&length\_mean=3.92376736e-03,length\_median=3.90025100e-03,length\_95%HPD={2.84069400e-03,5.01721100e-03}][&prob=1.00000000e+00,prob\_stddev=0.00000000e+00,prob\_range={1.00000000e+00,1.00000000e+00},prob(percent)="100",prob+-sd="100+-0"]:3.268058e-03[&length\_mean=3.30149023e-03,length\_median=3.26805800e-03,length\_95%HPD={2.23146000e-03,4.32939200e-03}],(120[&prob=1.00000000e+00,prob\_stddev=0.00000000e+00,prob\_range={1.00000000e+00,1.00000000e+00},prob(percent)="100",prob+-sd="100+-0"]:2.016068e-03[&length\_mean=2.03563341e-03,length\_median=2.01606800e-03,length\_95%HPD={1.30631100e-03,2.80811300e-03}],121[&prob=1.00000000e+00,prob\_stddev=0.00000000e+00,prob\_range={1.00000000e+00,1.00000000e+00},prob(percent)="100",prob+-sd="100+-0"]:1.180230e-03[&length\_mean=1.19933955e-03,length\_median=1.18023000e-03,length\_95%HPD={6.50953000e-04,1.82324300e-03}][&prob=1.00000000e+00,prob\_stddev=0.00000000e+00,prob\_range={1.00000000e+00,1.00000000e+00},prob(percent)="100",prob+-sd="100+-0"]:4.776517e-03[&length\_mean=4.80034482e-03,length\_median=4.77651700e-03,length\_95%HPD={3.50091100e-03,6.00973000e-03}][&prob=1.00000000e+00,prob\_stddev=0.00000000e+00,prob\_range={1.00000000e+00,1.00000000e+00},prob(percent)="100",prob+-sd="100+-0"]:2.371786e-03[&length\_mean=2.39488106e-03,length\_median=2.37178600e-03,length\_95%HPD={1.41257900e-03,3.39289600e-03}],189[&prob=1.00000000e+00,prob\_stddev=0.00000000e+00,prob\_range={1.00000000e+00,1.00000000e+00},prob(percent)="100",prob+-sd="100+-0"]:1.045989e-02[&length\_mean=1.04997956e-02,length\_median=1.04598900e-02,length\_95%HPD={8.58485000e-03,1.24612900e-02}][&prob=1.00000000e+00,prob\_stddev=0.00000000e+00,prob\_range={1.00000000e+00,1.00000000e+00},prob(percent)="100",prob+-sd="100+-0"]:2.588529e-03[&length\_mean=2.62354086e-03,length\_median=2.58852900e-03,length\_95%HPD={1.49665800e-03,3.89588100e-03}][&prob=1.00000000e+00,prob\_stddev=0.00000000e+00,prob\_range={1.00000000e+00,1.00000000e+00},prob(percent)="100",prob+-sd="100+-0"]:2.374756e-02[&length\_mean=2.37813155e-02,length\_median=2.37475600e-02,length\_95%HPD={2.05555600e-02,2.71505200e-02}],((40[&prob=1.00000000e+00,prob\_stddev=0.00000000e+00,prob\_range={1.00000000e+00,1.00000000e+00},prob(percent)="100",prob+-sd="100+-0"]:1.028522e-02[&length\_mean=1.03144626e-02,length\_median=1.02852200e-02,length\_95%HPD={8.35526600e-03,1.22044900e-02}],(49[&prob=1.00000000e+00,prob\_stddev=0.00000000e+00,prob\_range={1.00000000e+00,1.00000000e+00},prob(percent)="100",prob+-sd="100+-0"]:7.895455e-03[&length\_mean=7.93411058e-03,length\_median=7.89545500e-03,length\_95%HPD={6.29334400e-03,9.56795200e-03}],55[&prob=1.00000000e+00,prob\_stddev=0.00000000e+00,prob\_range={1.00000000e+00,1.00000000e+00},prob(percent)="100",prob+-sd="100+-0"]:7.192648e-03[&length\_mean=7.22566973e-03,length\_median=7.19264800e-03,length\_95%HPD={5.72908300e-03,8.85236000e-03}][&prob=1.00000000e+00,prob\_stddev=0.00000000e+00,prob\_range={1.00000000e+00,1.00000000e+00},prob(percent)="100",prob+-sd="100+-0"]:5.181668e-03[&length\_mean=5.22139852e-03,length\_median=5.18166800e-03,length\_95%HPD={3.83936600e-03,6.65086400e-03}][&prob=9.88868151e-01,prob\_stddev=8.48415015e-04,prob\_range={9.88268231e-01,9.89468071e-01},prob(percent)="99",prob+-sd="99+-0"]:1.013273e-03[&length\_mean=1.05081682e-03,length\_median=1.01327300e-03,length\_95%HPD={3.67107700e-04,1.85501400e-03}],(58[&prob=1.00000000e+00,prob\_stddev=0.00000000e+00,prob\_range={1.00000000e+00,1.00000000e+00},prob(percent)="100",prob+-sd="100+-0"]:5.153373e-03[&length\_mean=5.16572128e-03,length\_median=5.15337300e-03,length\_95%HPD={3.94389500e-03,6.50276000e-03}],(59[&prob=1.00000000e+00,prob\_stddev=0.00000000e+00,prob\_range={1.00000000e+00,1.00000000e+00},prob(percent)="100",prob+-sd="100+-0"]:1.775714e-03[&length\_mean=1.80715594e-03,length\_median=1.77571400e-03,length\_95%HPD={1.09535500e-03,2.56377500e-03}],(122[&prob=1.00000000e+00,prob\_stddev=0.00000000e+00,prob\_range={1.00000000e+00,1.00000000e+00},prob(percent)="100",prob+-sd="100+-0"]:7.617137e-04[&length\_mean=7.90960751e-04,length\_median=7.61713700e-04,length\_95%HPD={3.35054200e-04,1.28753900e-03}],185[&prob=1.00000000e+00,prob\_stddev=0.00000000e+00,prob\_range={1.00000000e+00,1.00000000e+00},prob(percent)="100",prob+-sd="100+-0"]:9.403409e-04[&length\_mean=9.62538744e-

04,length\_median=9.40340900e-04,length\_95%HPD={4.41586800e-04,1.49705500e-03}][&prob=1.00000000e+00,prob\_stddev=0.00000000e+00,prob\_range={1.00000000e+00,1.00000000e+00},prob(percent)="100",prob+-sd="100+-0"]]:1.497142e-03[&length\_mean=1.52593421e-03,length\_median=1.49714200e-03,length\_95%HPD={8.86369600e-04,2.21036600e-03}][&prob=9.95000667e-01,prob\_stddev=4.71341675e-04,prob\_range={9.94667378e-01,9.95333955e-01},prob(percent)="100",prob+-sd="100+-0"]]:6.364383e-04[&length\_mean=6.61939313e-04,length\_median=6.36438300e-04,length\_95%HPD={1.38197800e-04,1.22774900e-03}][&prob=1.00000000e+00,prob\_stddev=0.00000000e+00,prob\_range={1.00000000e+00,1.00000000e+00},prob(percent)="100",prob+-sd="100+-0"]]:9.836613e-03[&length\_mean=9.89162532e-03,length\_median=9.83661300e-03,length\_95%HPD={8.06122400e-03,1.18742100e-02}][&prob=1.00000000e+00,prob\_stddev=0.00000000e+00,prob\_range={1.00000000e+00,1.00000000e+00},prob(percent)="100",prob+-sd="100+-0"]]:3.968757e-03[&length\_mean=3.99608257e-03,length\_median=3.96875700e-03,length\_95%HPD={2.52559700e-03,5.63877800e-03}][&prob=1.00000000e+00,prob\_stddev=0.00000000e+00,prob\_range={1.00000000e+00,1.00000000e+00},prob(percent)="100",prob+-sd="100+-0"]]:3.805322e-03[&length\_mean=3.85556657e-03,length\_median=3.80532200e-03,length\_95%HPD={2.13810300e-03,5.62466100e-03}],((38[&prob=1.00000000e+00,prob\_stddev=0.00000000e+00,prob\_range={1.00000000e+00,1.00000000e+00},prob(percent)="100",prob+-sd="100+-0"]]:3.941174e-03[&length\_mean=3.96479054e-03,length\_median=3.94117400e-03,length\_95%HPD={2.84407900e-03,5.09497700e-03}],(74[&prob=1.00000000e+00,prob\_stddev=0.00000000e+00,prob\_range={1.00000000e+00,1.00000000e+00},prob(percent)="100",prob+-sd="100+-0"]]:1.812028e-03[&length\_mean=1.83430820e-03,length\_median=1.81202800e-03,length\_95%HPD={1.12401200e-03,2.58384600e-03}],159[&prob=1.00000000e+00,prob\_stddev=0.00000000e+00,prob\_range={1.00000000e+00,1.00000000e+00},prob(percent)="100",prob+-sd="100+-0"]]:1.352771e-03[&length\_mean=1.38704233e-03,length\_median=1.35277100e-03,length\_95%HPD={7.73954500e-04,2.02694000e-03}][&prob=1.00000000e+00,prob\_stddev=0.00000000e+00,prob\_range={1.00000000e+00,1.00000000e+00},prob(percent)="100",prob+-sd="100+-0"]]:1.775392e-03[&length\_mean=1.80311453e-03,length\_median=1.77539200e-03,length\_95%HPD={1.03989100e-03,2.56540700e-03}][&prob=9.99800027e-01,prob\_stddev=2.82805005e-04,prob\_range={9.99600053e-01,1.00000000e+00},prob(percent)="100",prob+-sd="100+-0"]]:2.126204e-03[&length\_mean=2.16509107e-03,length\_median=2.12620400e-03,length\_95%HPD={9.79968100e-04,3.41187900e-03}],179[&prob=1.00000000e+00,prob\_stddev=0.00000000e+00,prob\_range={1.00000000e+00,1.00000000e+00},prob(percent)="100",prob+-sd="100+-0"]]:9.479823e-03[&length\_mean=9.50264745e-03,length\_median=9.47982300e-03,length\_95%HPD={7.48355500e-03,1.14744300e-02}][&prob=1.00000000e+00,prob\_stddev=0.00000000e+00,prob\_range={1.00000000e+00,1.00000000e+00},prob(percent)="100",prob+-sd="100+-0"]]:3.393801e-02[&length\_mean=3.40603864e-02,length\_median=3.39380100e-02,length\_95%HPD={2.99493100e-02,3.81032900e-02}][&prob=1.00000000e+00,prob\_stddev=0.00000000e+00,prob\_range={1.00000000e+00,1.00000000e+00},prob(percent)="100",prob+-sd="100+-0"]]:8.026865e-03[&length\_mean=8.06839370e-03,length\_median=8.02686500e-03,length\_95%HPD={5.89651300e-03,1.01996000e-02}][&prob=1.00000000e+00,prob\_stddev=0.00000000e+00,prob\_range={1.00000000e+00,1.00000000e+00},prob(percent)="100",prob+-sd="100+-0"]]:2.867234e-03[&length\_mean=2.91029832e-03,length\_median=2.86723400e-03,length\_95%HPD={1.34513800e-03,4.52356400e-03}][&prob=1.00000000e+00,prob\_stddev=0.00000000e+00,prob\_range={1.00000000e+00,1.00000000e+00},prob(percent)="100",prob+-sd="100+-0"]]:8.945512e-03[&length\_mean=8.98894070e-03,length\_median=8.94551200e-03,length\_95%HPD={6.20091100e-03,1.19157800e-02}],134[&prob=1.00000000e+00,prob\_stddev=0.00000000e+00,prob\_range={1.00000000e+00,1.00000000e+00},prob(percent)="100",prob+-sd="100+-0"]]:2.566807e-02[&length\_mean=2.56942805e-02,length\_median=2.56680700e-02,length\_95%HPD={2.18902800e-02,2.97098100e-02}][&prob=1.00000000e+00,prob\_stddev=0.00000000e+00,prob\_range={1.00000000e+00,1.00000000e+00},prob(percent)="100",prob+-sd="100+-0"]]:2.266626e-02[&length\_mean=2.27095415e-02,length\_median=2.26662600e-02,length\_95%HPD={1.76629100e-02,2.78178900e-02}],((4[&prob=1.00000000e+00,prob\_stddev=0.00000000e+00,prob\_range={1.00000000e+00,1.00000000e+00},prob(percent)="100",prob+-sd="100+-0"]]:1.510290e-02[&length\_mean=1.51513268e-02,length\_median=1.51029000e-02,length\_95%HPD={1.26712800e-02,1.76955800e-02}],((15[&prob=1.00000000e+00,prob\_stddev=0.00000000e+00,prob\_range={1.00000000e+00,1.00000000e+00},prob(percent)="100",prob+-sd="100+-0"]]:1.646298e-03[&length\_mean=1.67452193e-03,length\_median=1.64629800e-03,length\_95%HPD={1.03017600e-03,2.42146800e-03}],(17[&prob=1.00000000e+00,prob\_stddev=0.00000000e+00,prob\_range={1.00000000e+00,1.00000000e+00},prob(percent)="100",prob+-sd="100+-0"]]:1.966225e-03[&length\_mean=2.00008108e-

03,length\_median=1.96622500e-03,length\_95%HPD={1.28349500e-03,2.76871200e-03}],191[&prob=1.00000000e+00,prob\_stddev=0.00000000e+00,prob\_range={1.00000000e+00,1.00000000e+00},prob(percent)="100",prob+-sd="100+-0"]:2.014653e-03[&length\_mean=2.04620214e-03,length\_median=2.01465300e-03,length\_95%HPD={1.28632900e-03,2.86280700e-03}]]&prob=9.99933342e-01,prob\_stddev=9.42683350e-05,prob\_range={9.99866684e-01,1.00000000e+00},prob(percent)="100",prob+-sd="100+-0"]:4.193316e-04[&length\_mean=4.48147730e-04,length\_median=4.19331600e-04,length\_95%HPD={9.96383000e-05,8.40023200e-04}]]&prob=1.00000000e+00,prob\_stddev=0.00000000e+00,prob\_range={1.00000000e+00,1.00000000e+00},prob(percent)="100",prob+-sd="100+-0"]:2.820543e-03[&length\_mean=2.84745934e-03,length\_median=2.82054300e-03,length\_95%HPD={1.81423500e-03,3.86305200e-03}],((65[&prob=1.00000000e+00,prob\_stddev=0.00000000e+00,prob\_range={1.00000000e+00,1.00000000e+00},prob(percent)="100",prob+-sd="100+-0"]:2.244320e-03[&length\_mean=2.26950514e-03,length\_median=2.24432000e-03,length\_95%HPD={1.51514500e-03,3.06142200e-03}]),(194[&prob=1.00000000e+00,prob\_stddev=0.00000000e+00,prob\_range={1.00000000e+00,1.00000000e+00},prob(percent)="100",prob+-sd="100+-0"]:2.035248e-03[&length\_mean=2.05349179e-03,length\_median=2.03524800e-03,length\_95%HPD={1.34444600e-03,2.85694000e-03}]),((205[&prob=1.00000000e+00,prob\_stddev=0.00000000e+00,prob\_range={1.00000000e+00,1.00000000e+00},prob(percent)="100",prob+-sd="100+-0"]:7.108922e-04[&length\_mean=7.34700672e-04,length\_median=7.10892200e-04,length\_95%HPD={3.24048900e-04,1.19698800e-03}]),208[&prob=1.00000000e+00,prob\_stddev=0.00000000e+00,prob\_range={1.00000000e+00,1.00000000e+00},prob(percent)="100",prob+-sd="100+-0"]:6.344834e-04[&length\_mean=6.58591665e-04,length\_median=6.34483400e-04,length\_95%HPD={2.76613700e-04,1.08757700e-03}]]&prob=1.00000000e+00,prob\_stddev=0.00000000e+00,prob\_range={1.00000000e+00,1.00000000e+00},prob(percent)="100",prob+-sd="100+-0"]:2.693734e-04[&length\_mean=2.92371679e-04,length\_median=2.69373400e-04,length\_95%HPD={4.93584300e-05,5.85837600e-04}]),206[&prob=1.00000000e+00,prob\_stddev=0.00000000e+00,prob\_range={1.00000000e+00,1.00000000e+00},prob(percent)="100",prob+-sd="100+-0"]:4.140793e-04[&length\_mean=4.38214147e-04,length\_median=4.14079300e-04,length\_95%HPD={1.29281000e-04,7.87530800e-04}]]&prob=1.00000000e+00,prob\_stddev=0.00000000e+00,prob\_range={1.00000000e+00,1.00000000e+00},prob(percent)="100",prob+-sd="100+-0"]:7.087991e-04[&length\_mean=7.35672158e-04,length\_median=7.08799100e-04,length\_95%HPD={3.07121900e-04,1.18019100e-03}]),207[&prob=1.00000000e+00,prob\_stddev=0.00000000e+00,prob\_range={1.00000000e+00,1.00000000e+00},prob(percent)="100",prob+-sd="100+-0"]:6.931399e-04[&length\_mean=7.23579965e-04,length\_median=6.93139900e-04,length\_95%HPD={2.94162900e-04,1.18432100e-03}]]&prob=1.00000000e+00,prob\_stddev=0.00000000e+00,prob\_range={1.00000000e+00,1.00000000e+00},prob(percent)="100",prob+-sd="100+-0"]:4.272371e-04[&length\_mean=4.52908289e-04,length\_median=4.27237100e-04,length\_95%HPD={1.20264300e-04,8.23377200e-04}]]&prob=7.93960805e-01,prob\_stddev=1.60256170e-03,prob\_range={7.92827623e-01,7.95093987e-01},prob(percent)="79",prob+-sd="79+-0"]:1.217207e-04[&length\_mean=1.46284932e-04,length\_median=1.21720700e-04,length\_95%HPD={3.36762000e-08,3.59689000e-04}]]&prob=1.00000000e+00,prob\_stddev=0.00000000e+00,prob\_range={1.00000000e+00,1.00000000e+00},prob(percent)="100",prob+-sd="100+-0"]:2.852600e-04[&length\_mean=3.09447325e-04,length\_median=2.85260000e-04,length\_95%HPD={4.72520400e-05,6.06204900e-04}],((((195[&prob=1.00000000e+00,prob\_stddev=0.00000000e+00,prob\_range={1.00000000e+00,1.00000000e+00},prob(percent)="100",prob+-sd="100+-0"]:1.940015e-04[&length\_mean=2.19877336e-04,length\_median=1.94001500e-04,length\_95%HPD={2.26450400e-05,4.78297700e-04}]),198[&prob=1.00000000e+00,prob\_stddev=0.00000000e+00,prob\_range={1.00000000e+00,1.00000000e+00},prob(percent)="100",prob+-sd="100+-0"]:5.171294e-05[&length\_mean=7.40357617e-05,length\_median=5.17129400e-05,length\_95%HPD={1.60649500e-08,2.21497000e-04}]]&prob=3.40354619e-01,prob\_stddev=2.82805005e-03,prob\_range={3.38354886e-01,3.42354353e-01},prob(percent)="34",prob+-sd="34+-0"]:4.829731e-05[&length\_mean=7.09553241e-05,length\_median=4.82973100e-05,length\_95%HPD={1.30230600e-08,2.10194300e-04}]),200[&prob=1.00000000e+00,prob\_stddev=0.00000000e+00,prob\_range={1.00000000e+00,1.00000000e+00},prob(percent)="100",prob+-sd="100+-0"]:4.177483e-04[&length\_mean=4.38566324e-04,length\_median=4.17748300e-04,length\_95%HPD={1.20112100e-04,7.90014200e-04}]]&prob=1.00000000e+00,prob\_stddev=0.00000000e+00,prob\_range={1.00000000e+00,1.00000000e+00},prob(percent)="100",prob+-sd="100+-0"]:2.702329e-04[&length\_mean=2.91524865e-04,length\_median=2.70232900e-04,length\_95%HPD={5.34588500e-05,5.70325800e-04}]),199[&prob=1.00000000e+00,prob\_stddev=0.00000000e+00,prob\_range={1.00000000e+00,1.00000000e+00},prob(percent)="100",prob+-sd="100+-0"]:2.653519e-04[&length\_mean=2.87648752e-

04,length\_median=2.65351900e-04,length\_95%HPD={5.21152500e-05,5.69621800e-04}])&prob=3.38688175e-01,prob\_stddev=3.48792840e-03,prob\_range={3.36221837e-01,3.41154513e-01},prob(percent)="34",prob+-sd="34+-0":5.183948e-05[&length\_mean=7.47719577e-05,length\_median=5.18394800e-05,length\_95%HPD={3.66449700e-08,2.22027900e-04}],(196[&prob=1.00000000e+00,prob\_stddev=0.00000000e+00,prob\_range={1.00000000e+00,1.00000000e+00},prob(percent)="100",prob+-sd="100+-0":3.786816e-04[&length\_mean=4.02477185e-04,length\_median=3.78681600e-04,length\_95%HPD={9.52664100e-05,7.35987000e-04}],(197[&prob=1.00000000e+00,prob\_stddev=0.00000000e+00,prob\_range={1.00000000e+00,1.00000000e+00},prob(percent)="100",prob+-sd="100+-0":1.587841e-04[&length\_mean=1.84114363e-04,length\_median=1.58784100e-04,length\_95%HPD={7.73890300e-06,4.25255100e-04}],(201[&prob=1.00000000e+00,prob\_stddev=0.00000000e+00,prob\_range={1.00000000e+00,1.00000000e+00},prob(percent)="100",prob+-sd="100+-0":4.975104e-05[&length\_mean=7.09461628e-05,length\_median=4.97510400e-05,length\_95%HPD={2.04101500e-08,2.12959100e-04}],202[&prob=1.00000000e+00,prob\_stddev=0.00000000e+00,prob\_range={1.00000000e+00,1.00000000e+00},prob(percent)="100",prob+-sd="100+-0":5.002062e-05[&length\_mean=7.17058093e-05,length\_median=5.00206200e-05,length\_95%HPD={1.16142400e-08,2.09165100e-04}])&prob=4.85668578e-01,prob\_stddev=6.22171011e-03,prob\_range={4.81269164e-01,4.90067991e-01},prob(percent)="49",prob+-sd="49+-1":8.327436e-05[&length\_mean=1.10136039e-04,length\_median=8.32743600e-05,length\_95%HPD={3.41518500e-08,3.09753800e-04}])&prob=6.84575390e-01,prob\_stddev=3.01658672e-03,prob\_range={6.82442341e-01,6.86708439e-01},prob(percent)="68",prob+-sd="68+-0":1.223074e-04[&length\_mean=1.47081197e-04,length\_median=1.22307400e-04,length\_95%HPD={5.06038700e-06,3.54334700e-04}])&prob=9.96400480e-01,prob\_stddev=2.07390337e-03,prob\_range={9.94934009e-01,9.97866951e-01},prob(percent)="100",prob+-sd="100+-0":1.770863e-04[&length\_mean=2.00565622e-04,length\_median=1.77086300e-04,length\_95%HPD={1.34151300e-05,4.41688800e-04}])&prob=1.00000000e+00,prob\_stddev=0.00000000e+00,prob\_range={1.00000000e+00,1.00000000e+00},prob(percent)="100",prob+-sd="100+-0":7.775235e-04[&length\_mean=8.07481381e-04,length\_median=7.77523500e-04,length\_95%HPD={3.58738100e-04,1.29188400e-03}],(203[&prob=1.00000000e+00,prob\_stddev=0.00000000e+00,prob\_range={1.00000000e+00,1.00000000e+00},prob(percent)="100",prob+-sd="100+-0":1.931109e-04[&length\_mean=2.17173346e-04,length\_median=1.93110900e-04,length\_95%HPD={2.18781000e-05,4.64019100e-04}],204[&prob=1.00000000e+00,prob\_stddev=0.00000000e+00,prob\_range={1.00000000e+00,1.00000000e+00},prob(percent)="100",prob+-sd="100+-0":1.974072e-04[&length\_mean=2.21474665e-04,length\_median=1.97407200e-04,length\_95%HPD={1.67304700e-05,4.68617600e-04}])&prob=1.00000000e+00,prob\_stddev=0.00000000e+00,prob\_range={1.00000000e+00,1.00000000e+00},prob(percent)="100",prob+-sd="100+-0":1.147701e-03[&length\_mean=1.17252745e-03,length\_median=1.14770100e-03,length\_95%HPD={6.17504800e-04,1.76033400e-03}])&prob=1.00000000e+00,prob\_stddev=0.00000000e+00,prob\_range={1.00000000e+00,1.00000000e+00},prob(percent)="100",prob+-sd="100+-0":8.376324e-04[&length\_mean=8.62585009e-04,length\_median=8.37632400e-04,length\_95%HPD={4.07268400e-04,1.36955600e-03}])&prob=8.32822290e-01,prob\_stddev=8.10707681e-03,prob\_range={8.27089721e-01,8.38554859e-01},prob(percent)="83",prob+-sd="83+-1":2.418888e-04[&length\_mean=2.67585196e-04,length\_median=2.41888800e-04,length\_95%HPD={1.23470000e-07,5.79008300e-04}],114[&prob=1.00000000e+00,prob\_stddev=0.00000000e+00,prob\_range={1.00000000e+00,1.00000000e+00},prob(percent)="100",prob+-sd="100+-0":2.620657e-03[&length\_mean=2.63685087e-03,length\_median=2.62065700e-03,length\_95%HPD={1.77880600e-03,3.51938000e-03}])&prob=1.00000000e+00,prob\_stddev=0.00000000e+00,prob\_range={1.00000000e+00,1.00000000e+00},prob(percent)="100",prob+-sd="100+-0":4.082404e-03[&length\_mean=4.10820474e-03,length\_median=4.08240400e-03,length\_95%HPD={3.01499600e-03,5.37420400e-03}])&prob=1.00000000e+00,prob\_stddev=0.00000000e+00,prob\_range={1.00000000e+00,1.00000000e+00},prob(percent)="100",prob+-sd="100+-0":3.816498e-03[&length\_mean=3.85080675e-03,length\_median=3.81649800e-03,length\_95%HPD={2.27622500e-03,5.45441600e-03}])&prob=1.00000000e+00,prob\_stddev=0.00000000e+00,prob\_range={1.00000000e+00,1.00000000e+00},prob(percent)="100",prob+-sd="100+-0":2.324025e-02[&length\_mean=2.32582307e-02,length\_median=2.32402500e-02,length\_95%HPD={1.93913000e-02,2.68752800e-02}],(((5[&prob=1.00000000e+00,prob\_stddev=0.00000000e+00,prob\_range={1.00000000e+00,1.00000000e+00},prob(percent)="100",prob+-sd="100+-0":5.986634e-04[&length\_mean=6.30069033e-04,length\_median=5.98663400e-04,length\_95%HPD={2.14078300e-04,1.15024000e-03}],6[&prob=1.00000000e+00,prob\_stddev=0.00000000e+00,prob\_range={1.00000000e+00,1.00000000e+00},prob(percent)="100",prob+-sd="100+-0":5.716420e-04[&length\_mean=5.99189452e-

04,length\_median=5.71642000e-04,length\_95%HPD={1.77367600e-04,1.08022700e-03}][&prob=1.00000000e+00,prob\_stddev=0.00000000e+00,prob\_range={1.00000000e+00,1.00000000e+00},prob(percent)="100",prob+-sd="100+-0"]:3.829463e-02[&length\_mean=3.83758288e-02,length\_median=3.82946300e-02,length\_95%HPD={3.32463600e-02,4.36926500e-02}],(37[&prob=1.00000000e+00,prob\_stddev=0.00000000e+00,prob\_range={1.00000000e+00,1.00000000e+00},prob(percent)="100",prob+-sd="100+-0"]:2.517163e-02[&length\_mean=2.52683188e-02,length\_median=2.51716300e-02,length\_95%HPD={2.13201800e-02,2.94401100e-02}],(115[&prob=1.00000000e+00,prob\_stddev=0.00000000e+00,prob\_range={1.00000000e+00,1.00000000e+00},prob(percent)="100",prob+-sd="100+-0"]:1.728433e-02[&length\_mean=1.72882192e-02,length\_median=1.72843300e-02,length\_95%HPD={1.43639000e-02,2.00625500e-02}],188[&prob=1.00000000e+00,prob\_stddev=0.00000000e+00,prob\_range={1.00000000e+00,1.00000000e+00},prob(percent)="100",prob+-sd="100+-0"]:1.451085e-02[&length\_mean=1.45478434e-02,length\_median=1.45108500e-02,length\_95%HPD={1.19348500e-02,1.73390500e-02}][&prob=1.00000000e+00,prob\_stddev=0.00000000e+00,prob\_range={1.00000000e+00,1.00000000e+00},prob(percent)="100",prob+-sd="100+-0"]:1.059727e-02[&length\_mean=1.06208719e-02,length\_median=1.05972700e-02,length\_95%HPD={7.60505600e-03,1.35570300e-02}][&prob=1.00000000e+00,prob\_stddev=0.00000000e+00,prob\_range={1.00000000e+00,1.00000000e+00},prob(percent)="100",prob+-sd="100+-0"]:4.021140e-02[&length\_mean=4.03194715e-02,length\_median=4.02114000e-02,length\_95%HPD={3.47247700e-02,4.62548300e-02}][&prob=7.86761765e-01,prob\_stddev=6.88158846e-03,prob\_range={7.81895747e-01,7.91627783e-01},prob(percent)="79",prob+-sd="79+-1"]:3.887476e-03[&length\_mean=3.95281714e-03,length\_median=3.88747600e-03,length\_95%HPD={1.38772300e-03,6.71106600e-03}],((((((((7[&prob=1.00000000e+00,prob\_stddev=0.00000000e+00,prob\_range={1.00000000e+00,1.00000000e+00},prob(percent)="100",prob+-sd="100+-0"]:1.778665e-03[&length\_mean=1.80348526e-03,length\_median=1.77866500e-03,length\_95%HPD={1.09166300e-03,2.54661900e-03}],93[&prob=1.00000000e+00,prob\_stddev=0.00000000e+00,prob\_range={1.00000000e+00,1.00000000e+00},prob(percent)="100",prob+-sd="100+-0"]:1.998706e-03[&length\_mean=2.02577416e-03,length\_median=1.99870600e-03,length\_95%HPD={1.29110400e-03,2.82718600e-03}][&prob=1.00000000e+00,prob\_stddev=0.00000000e+00,prob\_range={1.00000000e+00,1.00000000e+00},prob(percent)="100",prob+-sd="100+-0"]:3.787208e-03[&length\_mean=3.81376694e-03,length\_median=3.78720800e-03,length\_95%HPD={2.70510700e-03,4.89254300e-03}],((90[&prob=1.00000000e+00,prob\_stddev=0.00000000e+00,prob\_range={1.00000000e+00,1.00000000e+00},prob(percent)="100",prob+-sd="100+-0"]:7.463032e-04[&length\_mean=7.75884399e-04,length\_median=7.46303200e-04,length\_95%HPD={3.30551900e-04,1.27703700e-03}],91[&prob=1.00000000e+00,prob\_stddev=0.00000000e+00,prob\_range={1.00000000e+00,1.00000000e+00},prob(percent)="100",prob+-sd="100+-0"]:5.162855e-04[&length\_mean=5.41568412e-04,length\_median=5.16285500e-04,length\_95%HPD={1.76803000e-04,9.35846100e-04}][&prob=1.00000000e+00,prob\_stddev=0.00000000e+00,prob\_range={1.00000000e+00,1.00000000e+00},prob(percent)="100",prob+-sd="100+-0"]:1.364914e-03[&length\_mean=1.39339867e-03,length\_median=1.36491400e-03,length\_95%HPD={8.09940800e-04,2.06593000e-03}],92[&prob=1.00000000e+00,prob\_stddev=0.00000000e+00,prob\_range={1.00000000e+00,1.00000000e+00},prob(percent)="100",prob+-sd="100+-0"]:2.148038e-03[&length\_mean=2.17303239e-03,length\_median=2.14803800e-03,length\_95%HPD={1.43078700e-03,2.96782100e-03}][&prob=1.00000000e+00,prob\_stddev=0.00000000e+00,prob\_range={1.00000000e+00,1.00000000e+00},prob(percent)="100",prob+-sd="100+-0"]:2.765829e-03[&length\_mean=2.79759381e-03,length\_median=2.76582900e-03,length\_95%HPD={1.88673100e-03,3.79132000e-03}][&prob=1.00000000e+00,prob\_stddev=0.00000000e+00,prob\_range={1.00000000e+00,1.00000000e+00},prob(percent)="100",prob+-sd="100+-0"]:2.928909e-03[&length\_mean=2.96493427e-03,length\_median=2.92890900e-03,length\_95%HPD={1.95676000e-03,4.02265300e-03}],46[&prob=1.00000000e+00,prob\_stddev=0.00000000e+00,prob\_range={1.00000000e+00,1.00000000e+00},prob(percent)="100",prob+-sd="100+-0"]:8.905854e-03[&length\_mean=8.93027451e-03,length\_median=8.90585400e-03,length\_95%HPD={7.25950600e-03,1.07260000e-02}][&prob=1.00000000e+00,prob\_stddev=0.00000000e+00,prob\_range={1.00000000e+00,1.00000000e+00},prob(percent)="100",prob+-sd="100+-0"]:2.837834e-03[&length\_mean=2.86386638e-03,length\_median=2.83783400e-03,length\_95%HPD={1.85841800e-03,3.95820700e-03}],89[&prob=1.00000000e+00,prob\_stddev=0.00000000e+00,prob\_range={1.00000000e+00,1.00000000e+00},prob(percent)="100",prob+-sd="100+-0"]:1.254727e-02[&length\_mean=1.25591111e-02,length\_median=1.25472700e-02,length\_95%HPD={1.04778800e-02,1.47473400e-02}][&prob=1.00000000e+00,prob\_stddev=0.00000000e+00,prob\_range={1.00000000e+00,1.00000000e+00},prob(percent)="100",prob+-sd="100+-0"]:2.352735e-03[&length\_mean=2.37572358e-

03,length\_median=2.35273500e-03,length\_95%HPD={1.43025800e-03,3.39522500e-03}],(57[&prob=1.00000000e+00,prob\_stddev=0.00000000e+00,prob\_range={1.00000000e+00,1.00000000e+00},prob(percent)="100",prob+-sd="100+-0"]:1.933171e-02[&length\_mean=1.93599228e-02,length\_median=1.93317100e-02,length\_95%HPD={1.68375600e-02,2.22232900e-02}],(77[&prob=1.00000000e+00,prob\_stddev=0.00000000e+00,prob\_range={1.00000000e+00,1.00000000e+00},prob(percent)="100",prob+-sd="100+-0"]:7.574854e-03[&length\_mean=7.58653966e-03,length\_median=7.57485400e-03,length\_95%HPD={5.93934800e-03,9.26295800e-03}],166[&prob=1.00000000e+00,prob\_stddev=0.00000000e+00,prob\_range={1.00000000e+00,1.00000000e+00},prob(percent)="100",prob+-sd="100+-0"]:8.247012e-03[&length\_mean=8.28112844e-03,length\_median=8.24701200e-03,length\_95%HPD={6.50148600e-03,1.00266800e-02}])&prob=1.00000000e+00,prob\_stddev=0.00000000e+00,prob\_range={1.00000000e+00,1.00000000e+00},prob(percent)="100",prob+-sd="100+-0"]:1.092475e-02[&length\_mean=1.09551288e-02,length\_median=1.09247500e-02,length\_95%HPD={8.88030900e-03,1.30771800e-02}])&prob=9.99200107e-01,prob\_stddev=3.77073340e-04,prob\_range={9.98933476e-01,9.99466738e-01},prob(percent)="100",prob+-sd="100+-0"]:1.473054e-03[&length\_mean=1.51119288e-03,length\_median=1.47305400e-03,length\_95%HPD={5.44128400e-04,2.56428100e-03}])&prob=8.39888015e-01,prob\_stddev=6.22171011e-03,prob\_range={8.35488602e-01,8.44287428e-01},prob(percent)="84",prob+-sd="84+-1":4.748062e-04[&length\_mean=5.10765042e-04,length\_median=4.74806200e-04,length\_95%HPD={8.70749700e-05,1.01024600e-03}],((((123[&prob=1.00000000e+00,prob\_stddev=0.00000000e+00,prob\_range={1.00000000e+00,1.00000000e+00},prob(percent)="100",prob+-sd="100+-0"]:3.247297e-03[&length\_mean=3.27021585e-03,length\_median=3.24729700e-03,length\_95%HPD={2.28104800e-03,4.25968400e-03}],130[&prob=1.00000000e+00,prob\_stddev=0.00000000e+00,prob\_range={1.00000000e+00,1.00000000e+00},prob(percent)="100",prob+-sd="100+-0"]:4.816587e-03[&length\_mean=4.84960830e-03,length\_median=4.81658700e-03,length\_95%HPD={3.65200900e-03,6.06311700e-03}])&prob=1.00000000e+00,prob\_stddev=0.00000000e+00,prob\_range={1.00000000e+00,1.00000000e+00},prob(percent)="100",prob+-sd="100+-0"]:2.665382e-03[&length\_mean=2.69327294e-03,length\_median=2.66538200e-03,length\_95%HPD={1.80175900e-03,3.69749400e-03}],(((125[&prob=1.00000000e+00,prob\_stddev=0.00000000e+00,prob\_range={1.00000000e+00,1.00000000e+00},prob(percent)="100",prob+-sd="100+-0"]:5.617955e-04[&length\_mean=5.84993690e-04,length\_median=5.61795500e-04,length\_95%HPD={2.23519700e-04,1.00908700e-03}],131[&prob=1.00000000e+00,prob\_stddev=0.00000000e+00,prob\_range={1.00000000e+00,1.00000000e+00},prob(percent)="100",prob+-sd="100+-0"]:4.843453e-04[&length\_mean=5.08039889e-04,length\_median=4.84345300e-04,length\_95%HPD={1.80084500e-04,9.10873200e-04}])&prob=1.00000000e+00,prob\_stddev=0.00000000e+00,prob\_range={1.00000000e+00,1.00000000e+00},prob(percent)="100",prob+-sd="100+-0"]:2.646844e-04[&length\_mean=2.89074842e-04,length\_median=2.64684400e-04,length\_95%HPD={5.28809100e-05,5.87174300e-04}],129[&prob=1.00000000e+00,prob\_stddev=0.00000000e+00,prob\_range={1.00000000e+00,1.00000000e+00},prob(percent)="100",prob+-sd="100+-0"]:8.393297e-04[&length\_mean=8.66203954e-04,length\_median=8.39329700e-04,length\_95%HPD={4.06263200e-04,1.35847200e-03}])&prob=1.00000000e+00,prob\_stddev=0.00000000e+00,prob\_range={1.00000000e+00,1.00000000e+00},prob(percent)="100",prob+-sd="100+-0"]:8.164444e-04[&length\_mean=8.46123254e-04,length\_median=8.16444400e-04,length\_95%HPD={3.96106600e-04,1.37828400e-03}],(132[&prob=1.00000000e+00,prob\_stddev=0.00000000e+00,prob\_range={1.00000000e+00,1.00000000e+00},prob(percent)="100",prob+-sd="100+-0"]:1.003468e-03[&length\_mean=1.02682491e-03,length\_median=1.00346800e-03,length\_95%HPD={5.11577700e-04,1.53047100e-03}],133[&prob=1.00000000e+00,prob\_stddev=0.00000000e+00,prob\_range={1.00000000e+00,1.00000000e+00},prob(percent)="100",prob+-sd="100+-0"]:4.101264e-04[&length\_mean=4.33073133e-04,length\_median=4.10126400e-04,length\_95%HPD={1.17731400e-04,7.69841300e-04}])&prob=1.00000000e+00,prob\_stddev=0.00000000e+00,prob\_range={1.00000000e+00,1.00000000e+00},prob(percent)="100",prob+-sd="100+-0"]:1.180570e-03[&length\_mean=1.20577274e-03,length\_median=1.18057000e-03,length\_95%HPD={6.21644600e-04,1.80761800e-03}])&prob=1.00000000e+00,prob\_stddev=0.00000000e+00,prob\_range={1.00000000e+00,1.00000000e+00},prob(percent)="100",prob+-sd="100+-0"]:1.275324e-03[&length\_mean=1.30398054e-03,length\_median=1.27532400e-03,length\_95%HPD={7.42189300e-04,2.01310900e-03}],127[&prob=1.00000000e+00,prob\_stddev=0.00000000e+00,prob\_range={1.00000000e+00,1.00000000e+00},prob(percent)="100",prob+-sd="100+-0"]:2.957961e-03[&length\_mean=2.99867996e-03,length\_median=2.95796100e-03,length\_95%HPD={2.03536300e-03,3.96408400e-03}])&prob=1.00000000e+00,prob\_stddev=0.00000000e+00,prob\_range={1.00000000e+00,1.00000000e+00},prob(percent)="100",prob+-sd="100+-0"]:3.428885e-03[&length\_mean=3.45658479e-

03,length\_median=3.42888500e-03,length\_95%HPD={2.47759400e-03,4.55782200e-03}][&prob=1.00000000e+00,prob\_stddev=0.00000000e+00,prob\_range={1.00000000e+00,1.00000000e+00},prob(percent)="100",prob+-sd="100+-0"]:2.445534e-03[&length\_mean=2.47663482e-03,length\_median=2.44553400e-03,length\_95%HPD={1.55475900e-03,3.38173500e-03}],124[&prob=1.00000000e+00,prob\_stddev=0.00000000e+00,prob\_range={1.00000000e+00,1.00000000e+00},prob(percent)="100",prob+-sd="100+-0"]:4.618832e-03[&length\_mean=4.63596533e-03,length\_median=4.61883200e-03,length\_95%HPD={3.36880100e-03,5.87455900e-03}][&prob=1.00000000e+00,prob\_stddev=0.00000000e+00,prob\_range={1.00000000e+00,1.00000000e+00},prob(percent)="100",prob+-sd="100+-0"]:2.695872e-03[&length\_mean=2.72006646e-03,length\_median=2.69587200e-03,length\_95%HPD={1.68866600e-03,3.73607500e-03}],128[&prob=1.00000000e+00,prob\_stddev=0.00000000e+00,prob\_range={1.00000000e+00,1.00000000e+00},prob(percent)="100",prob+-sd="100+-0"]:9.921786e-03[&length\_mean=9.94474971e-03,length\_median=9.92178600e-03,length\_95%HPD={8.03103400e-03,1.17662500e-02}][&prob=1.00000000e+00,prob\_stddev=0.00000000e+00,prob\_range={1.00000000e+00,1.00000000e+00},prob(percent)="100",prob+-sd="100+-0"]:1.554092e-03[&length\_mean=1.58836218e-03,length\_median=1.55409200e-03,length\_95%HPD={8.22985100e-04,2.47071200e-03}],209[&prob=1.00000000e+00,prob\_stddev=0.00000000e+00,prob\_range={1.00000000e+00,1.00000000e+00},prob(percent)="100",prob+-sd="100+-0"]:1.163084e-02[&length\_mean=1.16469186e-02,length\_median=1.16308400e-02,length\_95%HPD={9.74921300e-03,1.36879200e-02}][&prob=1.00000000e+00,prob\_stddev=0.00000000e+00,prob\_range={1.00000000e+00,1.00000000e+00},prob(percent)="100",prob+-sd="100+-0"]:3.237225e-03[&length\_mean=3.27066288e-03,length\_median=3.23722500e-03,length\_95%HPD={2.12031700e-03,4.48353900e-03}],(126[&prob=1.00000000e+00,prob\_stddev=0.00000000e+00,prob\_range={1.00000000e+00,1.00000000e+00},prob(percent)="100",prob+-sd="100+-0"]:4.644800e-03[&length\_mean=4.68390174e-03,length\_median=4.64480000e-03,length\_95%HPD={3.47306600e-03,6.03436400e-03}],138[&prob=1.00000000e+00,prob\_stddev=0.00000000e+00,prob\_range={1.00000000e+00,1.00000000e+00},prob(percent)="100",prob+-sd="100+-0"]:6.066759e-03[&length\_mean=6.11457140e-03,length\_median=6.06675900e-03,length\_95%HPD={4.73859800e-03,7.60563700e-03}][&prob=1.00000000e+00,prob\_stddev=0.00000000e+00,prob\_range={1.00000000e+00,1.00000000e+00},prob(percent)="100",prob+-sd="100+-0"]:7.114219e-03[&length\_mean=7.14038096e-03,length\_median=7.11421900e-03,length\_95%HPD={5.54135600e-03,8.72194400e-03}][&prob=1.00000000e+00,prob\_stddev=0.00000000e+00,prob\_range={1.00000000e+00,1.00000000e+00},prob(percent)="100",prob+-sd="100+-0"]:7.351893e-03[&length\_mean=7.39407301e-03,length\_median=7.35189300e-03,length\_95%HPD={5.81519700e-03,9.12970500e-03}][&prob=1.00000000e+00,prob\_stddev=0.00000000e+00,prob\_range={1.00000000e+00,1.00000000e+00},prob(percent)="100",prob+-sd="100+-0"]:2.300785e-03[&length\_mean=2.33214802e-03,length\_median=2.30078500e-03,length\_95%HPD={1.36251000e-03,3.34160500e-03}],((111[&prob=1.00000000e+00,prob\_stddev=0.00000000e+00,prob\_range={1.00000000e+00,1.00000000e+00},prob(percent)="100",prob+-sd="100+-0"]:1.296500e-03[&length\_mean=1.31698816e-03,length\_median=1.29650000e-03,length\_95%HPD={7.62494400e-04,1.98098500e-03}],113[&prob=1.00000000e+00,prob\_stddev=0.00000000e+00,prob\_range={1.00000000e+00,1.00000000e+00},prob(percent)="100",prob+-sd="100+-0"]:5.986339e-04[&length\_mean=6.21510782e-04,length\_median=5.98633900e-04,length\_95%HPD={2.31811500e-04,1.05652000e-03}][&prob=5.09465405e-01,prob\_stddev=6.59878345e-04,prob\_range={5.08998800e-01,5.09932009e-01},prob(percent)="51",prob+-sd="51+-0"]:1.706058e-04[&length\_mean=1.93965143e-04,length\_median=1.70605800e-04,length\_95%HPD={1.25331400e-07,4.43670300e-04}],112[&prob=1.00000000e+00,prob\_stddev=0.00000000e+00,prob\_range={1.00000000e+00,1.00000000e+00},prob(percent)="100",prob+-sd="100+-0"]:6.330168e-04[&length\_mean=6.62996690e-04,length\_median=6.33016800e-04,length\_95%HPD={2.64623300e-04,1.15902900e-03}][&prob=1.00000000e+00,prob\_stddev=0.00000000e+00,prob\_range={1.00000000e+00,1.00000000e+00},prob(percent)="100",prob+-sd="100+-0"]:1.271292e-02[&length\_mean=1.27673590e-02,length\_median=1.27129200e-02,length\_95%HPD={1.07153800e-02,1.49698300e-02}][&prob=1.00000000e+00,prob\_stddev=0.00000000e+00,prob\_range={1.00000000e+00,1.00000000e+00},prob(percent)="100",prob+-sd="100+-0"]:1.613139e-03[&length\_mean=1.64186568e-03,length\_median=1.61313900e-03,length\_95%HPD={7.64077100e-04,2.59778900e-03}],110[&prob=1.00000000e+00,prob\_stddev=0.00000000e+00,prob\_range={1.00000000e+00,1.00000000e+00},prob(percent)="100",prob+-sd="100+-0"]:3.080182e-02[&length\_mean=3.08445064e-02,length\_median=3.08018200e-02,length\_95%HPD={2.70969600e-02,3.46962700e-02}][&prob=5.19664045e-01,prob\_stddev=1.50829336e-02,prob\_range={5.08998800e-01,5.30329289e-01},prob(percent)="52",prob+-sd="52+-2"]:6.573151e-04[&length\_mean=6.95562627e-

04,length\_median=6.57315100e-04,length\_95%HPD={6.00309200e-06,1.35630200e-03}},((63[&prob=1.00000000e+00,prob\_stddev=0.00000000e+00,prob\_range={1.00000000e+00,1.00000000e+00},prob(percent)="100",prob+-sd="100+-0"]):6.660745e-03[&length\_mean=6.67676074e-03,length\_median=6.66074500e-03,length\_95%HPD={5.22970500e-03,8.07221200e-03}],((100[&prob=1.00000000e+00,prob\_stddev=0.00000000e+00,prob\_range={1.00000000e+00,1.00000000e+00},prob(percent)="100",prob+-sd="100+-0"]):1.491467e-03[&length\_mean=1.52087426e-03,length\_median=1.49146700e-03,length\_95%HPD={8.69875800e-04,2.17224500e-03}],((103[&prob=1.00000000e+00,prob\_stddev=0.00000000e+00,prob\_range={1.00000000e+00,1.00000000e+00},prob(percent)="100",prob+-sd="100+-0"]):6.348076e-04[&length\_mean=6.59880592e-04,length\_median=6.34807600e-04,length\_95%HPD={2.76392100e-04,1.10394300e-03}],106[&prob=1.00000000e+00,prob\_stddev=0.00000000e+00,prob\_range={1.00000000e+00,1.00000000e+00},prob(percent)="100",prob+-sd="100+-0"]):2.675476e-04[&length\_mean=2.90672692e-04,length\_median=2.67547600e-04,length\_95%HPD={5.00867900e-05,5.71433300e-04}][&prob=1.00000000e+00,prob\_stddev=0.00000000e+00,prob\_range={1.00000000e+00,1.00000000e+00},prob(percent)="100",prob+-sd="100+-0"]):4.844155e-04[&length\_mean=5.08243661e-04,length\_median=4.84415500e-04,length\_95%HPD={1.79099600e-04,8.95199400e-04}],104[&prob=1.00000000e+00,prob\_stddev=0.00000000e+00,prob\_range={1.00000000e+00,1.00000000e+00},prob(percent)="100",prob+-sd="100+-0"]):1.224013e-03[&length\_mean=1.24593902e-03,length\_median=1.22401300e-03,length\_95%HPD={6.85724300e-04,1.86760700e-03}][&prob=8.83282229e-01,prob\_stddev=4.05353841e-03,prob\_range={8.80415945e-01,8.86148514e-01},prob(percent)="88",prob+-sd="88+-0"]):1.415473e-04[&length\_mean=1.67463921e-04,length\_median=1.41547300e-04,length\_95%HPD={8.08002700e-08,4.03384900e-04}][&prob=1.00000000e+00,prob\_stddev=0.00000000e+00,prob\_range={1.00000000e+00,1.00000000e+00},prob(percent)="100",prob+-sd="100+-0"]):9.607696e-04[&length\_mean=9.83750467e-04,length\_median=9.60769600e-04,length\_95%HPD={4.72873200e-04,1.56918600e-03}],102[&prob=1.00000000e+00,prob\_stddev=0.00000000e+00,prob\_range={1.00000000e+00,1.00000000e+00},prob(percent)="100",prob+-sd="100+-0"]):3.431328e-03[&length\_mean=3.45729826e-03,length\_median=3.43132800e-03,length\_95%HPD={2.52044800e-03,4.51936700e-03}][&prob=1.00000000e+00,prob\_stddev=0.00000000e+00,prob\_range={1.00000000e+00,1.00000000e+00},prob(percent)="100",prob+-sd="100+-0"]):3.552138e-03[&length\_mean=3.57954040e-03,length\_median=3.55213800e-03,length\_95%HPD={2.55957800e-03,4.68769400e-03}],101[&prob=1.00000000e+00,prob\_stddev=0.00000000e+00,prob\_range={1.00000000e+00,1.00000000e+00},prob(percent)="100",prob+-sd="100+-0"]):7.086125e-03[&length\_mean=7.12232080e-03,length\_median=7.08612500e-03,length\_95%HPD={5.53812500e-03,8.58641100e-03}][&prob=9.98533529e-01,prob\_stddev=0.00000000e+00,prob\_range={9.98533529e-01,9.98533529e-01},prob(percent)="100",prob+-sd="100+-0"]):8.637298e-04[&length\_mean=8.92332273e-04,length\_median=8.63729800e-04,length\_95%HPD={2.79993500e-04,1.52322100e-03}][&prob=1.00000000e+00,prob\_stddev=0.00000000e+00,prob\_range={1.00000000e+00,1.00000000e+00},prob(percent)="100",prob+-sd="100+-0"]):1.321287e-03[&length\_mean=1.35550659e-03,length\_median=1.32128700e-03,length\_95%HPD={6.52809900e-04,2.11736800e-03}],105[&prob=1.00000000e+00,prob\_stddev=0.00000000e+00,prob\_range={1.00000000e+00,1.00000000e+00},prob(percent)="100",prob+-sd="100+-0"]):7.436461e-03[&length\_mean=7.48362805e-03,length\_median=7.43646100e-03,length\_95%HPD={5.98427000e-03,9.08801000e-03}][&prob=1.00000000e+00,prob\_stddev=0.00000000e+00,prob\_range={1.00000000e+00,1.00000000e+00},prob(percent)="100",prob+-sd="100+-0"]):4.406191e-03[&length\_mean=4.44084815e-03,length\_median=4.40619100e-03,length\_95%HPD={3.16098200e-03,5.77818300e-03}][&prob=6.65511265e-01,prob\_stddev=1.92307403e-02,prob\_range={6.51913078e-01,6.79109452e-01},prob(percent)="67",prob+-sd="67+-2"]):1.043452e-03[&length\_mean=1.08195380e-03,length\_median=1.04345200e-03,length\_95%HPD={2.59604700e-04,1.95848000e-03}],(16[&prob=1.00000000e+00,prob\_stddev=0.00000000e+00,prob\_range={1.00000000e+00,1.00000000e+00},prob(percent)="100",prob+-sd="100+-0"]):5.102827e-03[&length\_mean=5.13228977e-03,length\_median=5.10282700e-03,length\_95%HPD={3.75324400e-03,6.48039200e-03}],((107[&prob=1.00000000e+00,prob\_stddev=0.00000000e+00,prob\_range={1.00000000e+00,1.00000000e+00},prob(percent)="100",prob+-sd="100+-0"]):1.878153e-03[&length\_mean=1.91247070e-03,length\_median=1.87815300e-03,length\_95%HPD={1.18375700e-03,2.68984800e-03}],108[&prob=1.00000000e+00,prob\_stddev=0.00000000e+00,prob\_range={1.00000000e+00,1.00000000e+00},prob(percent)="100",prob+-sd="100+-0"]):8.481843e-04[&length\_mean=8.74124039e-04,length\_median=8.48184300e-04,length\_95%HPD={3.91061800e-04,1.38905400e-03}][&prob=1.00000000e+00,prob\_stddev=0.00000000e+00,prob\_range={1.00000000e+00,1.00000000e+00},prob(percent)="100",prob+-sd="100+-0"]):2.316248e-03[&length\_mean=2.34399291e-



03,length\_median=2.31624800e-03,length\_95%HPD={1.56581400e-03,3.23754600e-03}],109[&prob=1.00000000e+00,prob\_stddev=0.00000000e+00,prob\_range={1.00000000e+00,1.00000000e+00},prob(percent)="100",prob+-sd="100+-0"]:3.383210e-03[&length\_mean=3.41647451e-03,length\_median=3.38321000e-03,length\_95%HPD={2.43019900e-03,4.47984400e-03}][&prob=1.00000000e+00,prob\_stddev=0.00000000e+00,prob\_range={1.00000000e+00,1.00000000e+00},prob(percent)="100",prob+-sd="100+-0"]:2.033328e-03[&length\_mean=2.06132984e-03,length\_median=2.03332800e-03,length\_95%HPD={1.15847900e-03,2.98238000e-03}][&prob=1.00000000e+00,prob\_stddev=0.00000000e+00,prob\_range={1.00000000e+00,1.00000000e+00},prob(percent)="100",prob+-sd="100+-0"]:1.547040e-02[&length\_mean=1.55273264e-02,length\_median=1.54704000e-02,length\_95%HPD={1.31885400e-02,1.81061800e-02}][&prob=9.99000133e-01,prob\_stddev=8.48415015e-04,prob\_range={9.98400213e-01,9.99600053e-01},prob(percent)="100",prob+-sd="100+-0"]:3.019414e-03[&length\_mean=3.04508894e-03,length\_median=3.01941400e-03,length\_95%HPD={1.31513100e-03,4.72301900e-03}],190[&prob=1.00000000e+00,prob\_stddev=0.00000000e+00,prob\_range={1.00000000e+00,1.00000000e+00},prob(percent)="100",prob+-sd="100+-0"]:2.404754e-02[&length\_mean=2.41665748e-02,length\_median=2.40475400e-02,length\_95%HPD={2.08787700e-02,2.77230200e-02}][&prob=1.00000000e+00,prob\_stddev=0.00000000e+00,prob\_range={1.00000000e+00,1.00000000e+00},prob(percent)="100",prob+-sd="100+-0"]:2.279716e-02[&length\_mean=2.28634727e-02,length\_median=2.27971600e-02,length\_95%HPD={1.93911100e-02,2.65327100e-02}],((19[&prob=1.00000000e+00,prob\_stddev=0.00000000e+00,prob\_range={1.00000000e+00,1.00000000e+00},prob(percent)="100",prob+-sd="100+-0"]:1.304993e-02[&length\_mean=1.31132895e-02,length\_median=1.30499300e-02,length\_95%HPD={1.06648800e-02,1.56345200e-02}],135[&prob=1.00000000e+00,prob\_stddev=0.00000000e+00,prob\_range={1.00000000e+00,1.00000000e+00},prob(percent)="100",prob+-sd="100+-0"]:1.923494e-02[&length\_mean=1.92828963e-02,length\_median=1.92349400e-02,length\_95%HPD={1.64162000e-02,2.24539900e-02}][&prob=1.00000000e+00,prob\_stddev=0.00000000e+00,prob\_range={1.00000000e+00,1.00000000e+00},prob(percent)="100",prob+-sd="100+-0"]:1.692707e-02[&length\_mean=1.70120692e-02,length\_median=1.69270700e-02,length\_95%HPD={1.41373000e-02,2.01053400e-02}],(20[&prob=1.00000000e+00,prob\_stddev=0.00000000e+00,prob\_range={1.00000000e+00,1.00000000e+00},prob(percent)="100",prob+-sd="100+-0"]:7.307314e-03[&length\_mean=7.36043214e-03,length\_median=7.30731400e-03,length\_95%HPD={5.74228500e-03,9.29478900e-03}],(176[&prob=1.00000000e+00,prob\_stddev=0.00000000e+00,prob\_range={1.00000000e+00,1.00000000e+00},prob(percent)="100",prob+-sd="100+-0"]:5.344849e-04[&length\_mean=5.65738569e-04,length\_median=5.34484900e-04,length\_95%HPD={1.82584600e-04,9.97536300e-04}],177[&prob=1.00000000e+00,prob\_stddev=0.00000000e+00,prob\_range={1.00000000e+00,1.00000000e+00},prob(percent)="100",prob+-sd="100+-0"]:2.782472e-04[&length\_mean=3.03390079e-04,length\_median=2.78247200e-04,length\_95%HPD={2.37007300e-05,6.27076600e-04}][&prob=1.00000000e+00,prob\_stddev=0.00000000e+00,prob\_range={1.00000000e+00,1.00000000e+00},prob(percent)="100",prob+-sd="100+-0"]:8.763971e-03[&length\_mean=8.76713838e-03,length\_median=8.76397100e-03,length\_95%HPD={6.98861200e-03,1.07453600e-02}][&prob=1.00000000e+00,prob\_stddev=0.00000000e+00,prob\_range={1.00000000e+00,1.00000000e+00},prob(percent)="100",prob+-sd="100+-0"]:1.938484e-02[&length\_mean=1.94432702e-02,length\_median=1.93848400e-02,length\_95%HPD={1.62945900e-02,2.28052800e-02}][&prob=1.00000000e+00,prob\_stddev=0.00000000e+00,prob\_range={1.00000000e+00,1.00000000e+00},prob(percent)="100",prob+-sd="100+-0"]:7.626890e-03[&length\_mean=7.66930049e-03,length\_median=7.62689000e-03,length\_95%HPD={5.32350200e-03,1.01514600e-02}],167[&prob=1.00000000e+00,prob\_stddev=0.00000000e+00,prob\_range={1.00000000e+00,1.00000000e+00},prob(percent)="100",prob+-sd="100+-0"]:2.264695e-02[&length\_mean=2.27059052e-02,length\_median=2.26469500e-02,length\_95%HPD={1.95446500e-02,2.61244600e-02}][&prob=1.00000000e+00,prob\_stddev=0.00000000e+00,prob\_range={1.00000000e+00,1.00000000e+00},prob(percent)="100",prob+-sd="100+-0"]:6.217958e-03[&length\_mean=6.26266127e-03,length\_median=6.21795800e-03,length\_95%HPD={4.10873900e-03,8.36186800e-03}][&prob=1.00000000e+00,prob\_stddev=0.00000000e+00,prob\_range={1.00000000e+00,1.00000000e+00},prob(percent)="100",prob+-sd="100+-0"]:5.941557e-03[&length\_mean=5.96723090e-03,length\_median=5.94155700e-03,length\_95%HPD={3.58919300e-03,8.33860600e-03}][&prob=1.00000000e+00,prob\_stddev=0.00000000e+00,prob\_range={1.00000000e+00,1.00000000e+00},prob(percent)="100",prob+-sd="100+-0"]:9.368401e-03[&length\_mean=9.42148452e-03,length\_median=9.36840100e-03,length\_95%HPD={6.61123100e-03,1.21857700e-02}],((((((((9[&prob=1.00000000e+00,prob\_stddev=0.00000000e+00,prob\_range={1.00000000e+00,1.00000000e+00},prob(percent)="100",prob+-sd="100+-0"]:4.315069e-04[&length\_mean=4.58539728e-

04,length\_median=4.31506900e-04,length\_95%HPD={1.31544900e-04,8.63100600e-04},10[&prob=1.00000000e+00,prob\_stddev=0.00000000e+00,prob\_range={1.00000000e+00,1.00000000e+00},prob(percent)="100",prob+-sd="100+-0"]:3.847684e-04[&length\_mean=4.09452982e-04,length\_median=3.84768400e-04,length\_95%HPD={8.40794700e-05,7.76934300e-04}][&prob=9.95467271e-01,prob\_stddev=7.54146680e-04,prob\_range={9.94934009e-01,9.96000533e-01},prob(percent)="100",prob+-sd="100+-0"]:3.350828e-04[&length\_mean=3.57390754e-04,length\_median=3.35082800e-04,length\_95%HPD={8.32615800e-05,6.75894500e-04}],11[&prob=1.00000000e+00,prob\_stddev=0.00000000e+00,prob\_range={1.00000000e+00,1.00000000e+00},prob(percent)="100",prob+-sd="100+-0"]:1.045741e-03[&length\_mean=1.07321627e-03,length\_median=1.04574100e-03,length\_95%HPD={5.45507100e-04,1.64862000e-03}][&prob=1.00000000e+00,prob\_stddev=0.00000000e+00,prob\_range={1.00000000e+00,1.00000000e+00},prob(percent)="100",prob+-sd="100+-0"]:7.103601e-04[&length\_mean=7.36650498e-04,length\_median=7.10360100e-04,length\_95%HPD={2.73086200e-04,1.21010200e-03}],14[&prob=1.00000000e+00,prob\_stddev=0.00000000e+00,prob\_range={1.00000000e+00,1.00000000e+00},prob(percent)="100",prob+-sd="100+-0"]:1.593789e-03[&length\_mean=1.61686925e-03,length\_median=1.59378900e-03,length\_95%HPD={9.71749500e-04,2.31555500e-03}][&prob=5.72123717e-01,prob\_stddev=1.06523219e-02,prob\_range={5.64591388e-01,5.79656046e-01},prob(percent)="57",prob+-sd="57+-1"]:1.081766e-04[&length\_mean=1.30864243e-04,length\_median=1.08176600e-04,length\_95%HPD={1.54589300e-08,3.31533400e-04}],12[&prob=1.00000000e+00,prob\_stddev=0.00000000e+00,prob\_range={1.00000000e+00,1.00000000e+00},prob(percent)="100",prob+-sd="100+-0"]:1.327935e-03[&length\_mean=1.35363134e-03,length\_median=1.32793500e-03,length\_95%HPD={7.28129100e-04,1.96957100e-03}][&prob=1.00000000e+00,prob\_stddev=0.00000000e+00,prob\_range={1.00000000e+00,1.00000000e+00},prob(percent)="100",prob+-sd="100+-0"]:4.922023e-04[&length\_mean=5.16085736e-04,length\_median=4.92202300e-04,length\_95%HPD={1.75194400e-04,8.97885100e-04}],165[&prob=1.00000000e+00,prob\_stddev=0.00000000e+00,prob\_range={1.00000000e+00,1.00000000e+00},prob(percent)="100",prob+-sd="100+-0"]:2.349984e-03[&length\_mean=2.36557336e-03,length\_median=2.34998400e-03,length\_95%HPD={1.55336700e-03,3.23324900e-03}][&prob=4.43607519e-01,prob\_stddev=5.75036844e-03,prob\_range={4.39541394e-01,4.47673644e-01},prob(percent)="44",prob+-sd="44+-1"]:9.525386e-05[&length\_mean=1.21101840e-04,length\_median=9.52538600e-05,length\_95%HPD={4.56624600e-08,3.22055900e-04}],((13[&prob=1.00000000e+00,prob\_stddev=0.00000000e+00,prob\_range={1.00000000e+00,1.00000000e+00},prob(percent)="100",prob+-sd="100+-0"]:2.687326e-03[&length\_mean=2.70476547e-03,length\_median=2.68732600e-03,length\_95%HPD={1.85379300e-03,3.63412900e-03}],137[&prob=1.00000000e+00,prob\_stddev=0.00000000e+00,prob\_range={1.00000000e+00,1.00000000e+00},prob(percent)="100",prob+-sd="100+-0"]:2.238416e-03[&length\_mean=2.26590774e-03,length\_median=2.23841600e-03,length\_95%HPD={1.49440700e-03,3.13043600e-03}][&prob=9.60805226e-01,prob\_stddev=8.86122349e-03,prob\_range={9.54539395e-01,9.67071057e-01},prob(percent)="96",prob+-sd="96+-1"]:2.673300e-04[&length\_mean=2.91648129e-04,length\_median=2.67330000e-04,length\_95%HPD={3.54525800e-05,6.05457600e-04}],142[&prob=1.00000000e+00,prob\_stddev=0.00000000e+00,prob\_range={1.00000000e+00,1.00000000e+00},prob(percent)="100",prob+-sd="100+-0"]:4.156530e-03[&length\_mean=4.17333191e-03,length\_median=4.15653000e-03,length\_95%HPD={3.11629900e-03,5.35377300e-03}][&prob=6.86508466e-01,prob\_stddev=5.37329510e-03,prob\_range={6.82708972e-01,6.90307959e-01},prob(percent)="69",prob+-sd="69+-1"]:1.244196e-04[&length\_mean=1.48363894e-04,length\_median=1.24419600e-04,length\_95%HPD={1.39307600e-08,3.50038700e-04}][&prob=1.00000000e+00,prob\_stddev=0.00000000e+00,prob\_range={1.00000000e+00,1.00000000e+00},prob(percent)="100",prob+-sd="100+-0"]:1.073873e-03[&length\_mean=1.09622931e-03,length\_median=1.07387300e-03,length\_95%HPD={5.51858600e-04,1.69448700e-03}],(48[&prob=1.00000000e+00,prob\_stddev=0.00000000e+00,prob\_range={1.00000000e+00,1.00000000e+00},prob(percent)="100",prob+-sd="100+-0"]:3.231576e-03[&length\_mean=3.24766067e-03,length\_median=3.23157600e-03,length\_95%HPD={2.29490300e-03,4.25212400e-03}],(219[&prob=1.00000000e+00,prob\_stddev=0.00000000e+00,prob\_range={1.00000000e+00,1.00000000e+00},prob(percent)="100",prob+-sd="100+-0"]:4.816491e-04[&length\_mean=5.09661458e-04,length\_median=4.81649100e-04,length\_95%HPD={1.70229300e-04,8.93229800e-04}],220[&prob=1.00000000e+00,prob\_stddev=0.00000000e+00,prob\_range={1.00000000e+00,1.00000000e+00},prob(percent)="100",prob+-sd="100+-0"]:4.078905e-04[&length\_mean=4.33815829e-04,length\_median=4.07890500e-04,length\_95%HPD={1.34895500e-04,7.96516600e-04}][&prob=1.00000000e+00,prob\_stddev=0.00000000e+00,prob\_range={1.00000000e+00,1.00000000e+00},prob(percent)="100",prob+-sd="100+-0"]:2.270774e-03[&length\_mean=2.29748069e-

03,length\_median=2.27077400e-03,length\_95%HPD={1.49397200e-03,3.19023000e-03}][&prob=1.00000000e+00,prob\_stddev=0.00000000e+00,prob\_range={1.00000000e+00,1.00000000e+00},prob(percent)="100",prob+-sd="100+-0"]]:9.248315e-04[&length\_mean=9.41589219e-04,length\_median=9.24831500e-04,length\_95%HPD={4.19445400e-04,1.47574400e-03}][&prob=1.00000000e+00,prob\_stddev=0.00000000e+00,prob\_range={1.00000000e+00,1.00000000e+00},prob(percent)="100",prob+-sd="100+-0"]]:2.684545e-03[&length\_mean=2.71480835e-03,length\_median=2.68454500e-03,length\_95%HPD={1.58737200e-03,3.80867100e-03}],22[&prob=1.00000000e+00,prob\_stddev=0.00000000e+00,prob\_range={1.00000000e+00,1.00000000e+00},prob(percent)="100",prob+-sd="100+-0"]]:6.275662e-03[&length\_mean=6.31479544e-03,length\_median=6.27566200e-03,length\_95%HPD={4.90827100e-03,7.84027200e-03}][&prob=1.00000000e+00,prob\_stddev=0.00000000e+00,prob\_range={1.00000000e+00,1.00000000e+00},prob(percent)="100",prob+-sd="100+-0"]]:1.346639e-02[&length\_mean=1.35251908e-02,length\_median=1.34663900e-02,length\_95%HPD={1.10332800e-02,1.61121700e-02}],140[&prob=1.00000000e+00,prob\_stddev=0.00000000e+00,prob\_range={1.00000000e+00,1.00000000e+00},prob(percent)="100",prob+-sd="100+-0"]]:2.144116e-02[&length\_mean=2.15006696e-02,length\_median=2.14411600e-02,length\_95%HPD={1.85378500e-02,2.46279100e-02}][&prob=1.00000000e+00,prob\_stddev=0.00000000e+00,prob\_range={1.00000000e+00,1.00000000e+00},prob(percent)="100",prob+-sd="100+-0"]]:1.131533e-02[&length\_mean=1.13414334e-02,length\_median=1.13153300e-02,length\_95%HPD={8.76921400e-03,1.38406300e-02}],((44[&prob=1.00000000e+00,prob\_stddev=0.00000000e+00,prob\_range={1.00000000e+00,1.00000000e+00},prob(percent)="100",prob+-sd="100+-0"]]:3.250221e-03[&length\_mean=3.2660970e-03,length\_median=3.25022100e-03,length\_95%HPD={2.28179400e-03,4.21744100e-03}],((64[&prob=1.00000000e+00,prob\_stddev=0.00000000e+00,prob\_range={1.00000000e+00,1.00000000e+00},prob(percent)="100",prob+-sd="100+-0"]]:1.283513e-03[&length\_mean=1.31090140e-03,length\_median=1.28351300e-03,length\_95%HPD={7.32105500e-04,1.93539500e-03}],((163[&prob=1.00000000e+00,prob\_stddev=0.00000000e+00,prob\_range={1.00000000e+00,1.00000000e+00},prob(percent)="100",prob+-sd="100+-0"]]:5.534460e-04[&length\_mean=5.75973029e-04,length\_median=5.53446000e-04,length\_95%HPD={1.96927400e-04,9.75657000e-04}],164[&prob=1.00000000e+00,prob\_stddev=0.00000000e+00,prob\_range={1.00000000e+00,1.00000000e+00},prob(percent)="100",prob+-sd="100+-0"]]:8.480291e-04[&length\_mean=8.73432857e-04,length\_median=8.48029100e-04,length\_95%HPD={4.20456600e-04,1.37165100e-03}][&prob=1.00000000e+00,prob\_stddev=0.00000000e+00,prob\_range={1.00000000e+00,1.00000000e+00},prob(percent)="100",prob+-sd="100+-0"]]:4.820825e-04[&length\_mean=5.03618016e-04,length\_median=4.82082500e-04,length\_95%HPD={1.62305200e-04,8.69391900e-04}],182[&prob=1.00000000e+00,prob\_stddev=0.00000000e+00,prob\_range={1.00000000e+00,1.00000000e+00},prob(percent)="100",prob+-sd="100+-0"]]:3.376518e-04[&length\_mean=3.60477821e-04,length\_median=3.37651800e-04,length\_95%HPD={8.93577500e-05,6.74361300e-04}][&prob=1.86108519e-01,prob\_stddev=1.50829336e-03,prob\_range={1.85041994e-01,1.87175043e-01},prob(percent)="19",prob+-sd="19+-0"]]:4.992250e-05[&length\_mean=7.20819864e-05,length\_median=4.99225000e-05,length\_95%HPD={3.10434800e-08,2.15207000e-04}],(183[&prob=1.00000000e+00,prob\_stddev=0.00000000e+00,prob\_range={1.00000000e+00,1.00000000e+00},prob(percent)="100",prob+-sd="100+-0"]]:7.932685e-04[&length\_mean=8.18707267e-04,length\_median=7.93268500e-04,length\_95%HPD={3.79090600e-04,1.33380100e-03}],184[&prob=1.00000000e+00,prob\_stddev=0.00000000e+00,prob\_range={1.00000000e+00,1.00000000e+00},prob(percent)="100",prob+-sd="100+-0"]]:7.130114e-04[&length\_mean=7.40361763e-04,length\_median=7.13011400e-04,length\_95%HPD={3.10403400e-04,1.20030100e-03}][&prob=7.49966671e-01,prob\_stddev=1.02752485e-02,prob\_range={7.42700973e-01,7.57232369e-01},prob(percent)="75",prob+-sd="75+-1"]]:1.175457e-04[&length\_mean=1.41875148e-04,length\_median=1.17545700e-04,length\_95%HPD={5.93630600e-07,3.41664800e-04}][&prob=1.88108252e-01,prob\_stddev=1.31975669e-03,prob\_range={1.87175043e-01,1.89041461e-01},prob(percent)="19",prob+-sd="19+-0"]]:4.984844e-05[&length\_mean=7.39697154e-05,length\_median=4.98484400e-05,length\_95%HPD={7.16840300e-08,2.19623000e-04}][&prob=1.00000000e+00,prob\_stddev=0.00000000e+00,prob\_range={1.00000000e+00,1.00000000e+00},prob(percent)="100",prob+-sd="100+-0"]]:2.133115e-03[&length\_mean=2.15030080e-03,length\_median=2.13311500e-03,length\_95%HPD={1.41296800e-03,2.95187200e-03}],(161[&prob=1.00000000e+00,prob\_stddev=0.00000000e+00,prob\_range={1.00000000e+00,1.00000000e+00},prob(percent)="100",prob+-sd="100+-0"]]:1.583721e-03[&length\_mean=1.60785503e-03,length\_median=1.58372100e-03,length\_95%HPD={9.14534100e-04,2.28087700e-03}],162[&prob=1.00000000e+00,prob\_stddev=0.00000000e+00,prob\_range={1.00000000e+00,1.00000000e+00},prob(percent)="100",prob+-sd="100+-0"]]:2.129097e-03[&length\_mean=2.15344129e-

03,length\_median=2.12909700e-03,length\_95%HPD={1.40248300e-03,2.98188800e-03}][&prob=1.00000000e+00,prob\_stddev=0.00000000e+00,prob\_range={1.00000000e+00,1.00000000e+00},prob(percent)="100",prob+-sd="100+-0"]:9.031748e-04[&length\_mean=9.22032781e-04,length\_median=9.03174800e-04,length\_95%HPD={4.25248000e-04,1.46261600e-03}][&prob=9.89734702e-01,prob\_stddev=1.31975669e-03,prob\_range={9.88801493e-01,9.90667911e-01},prob(percent)="99",prob+-sd="99+-0"]:3.429643e-04[&length\_mean=3.69831269e-04,length\_median=3.42964300e-04,length\_95%HPD={5.95531400e-05,7.45698000e-04}][&prob=1.00000000e+00,prob\_stddev=0.00000000e+00,prob\_range={1.00000000e+00,1.00000000e+00},prob(percent)="100",prob+-sd="100+-0"]:2.899917e-03[&length\_mean=2.92116293e-03,length\_median=2.89991700e-03,length\_95%HPD={1.90500500e-03,3.93287400e-03}],47[&prob=1.00000000e+00,prob\_stddev=0.00000000e+00,prob\_range={1.00000000e+00,1.00000000e+00},prob(percent)="100",prob+-sd="100+-0"]:6.384375e-03[&length\_mean=6.39713549e-03,length\_median=6.38437500e-03,length\_95%HPD={4.90783200e-03,7.83131100e-03}][&prob=1.00000000e+00,prob\_stddev=0.00000000e+00,prob\_range={1.00000000e+00,1.00000000e+00},prob(percent)="100",prob+-sd="100+-0"]:2.012637e-03[&length\_mean=2.03421719e-03,length\_median=2.01263700e-03,length\_95%HPD={1.05851700e-03,2.97763900e-03}],(((75[&prob=1.00000000e+00,prob\_stddev=0.00000000e+00,prob\_range={1.00000000e+00,1.00000000e+00},prob(percent)="100",prob+-sd="100+-0"]:2.146767e-03[&length\_mean=2.17392944e-03,length\_median=2.14676700e-03,length\_95%HPD={1.41747400e-03,2.97613600e-03}],87[&prob=1.00000000e+00,prob\_stddev=0.00000000e+00,prob\_range={1.00000000e+00,1.00000000e+00},prob(percent)="100",prob+-sd="100+-0"]:1.635099e-03[&length\_mean=1.65498601e-03,length\_median=1.63509900e-03,length\_95%HPD={9.92331400e-04,2.37230400e-03}][&prob=1.00000000e+00,prob\_stddev=0.00000000e+00,prob\_range={1.00000000e+00,1.00000000e+00},prob(percent)="100",prob+-sd="100+-0"]:1.662122e-03[&length\_mean=1.68819663e-03,length\_median=1.66212200e-03,length\_95%HPD={1.04626700e-03,2.41564400e-03}],88[&prob=1.00000000e+00,prob\_stddev=0.00000000e+00,prob\_range={1.00000000e+00,1.00000000e+00},prob(percent)="100",prob+-sd="100+-0"]:2.466079e-03[&length\_mean=2.49059418e-03,length\_median=2.46607900e-03,length\_95%HPD={1.66502500e-03,3.37064500e-03}][&prob=8.34822024e-01,prob\_stddev=2.45097671e-03,prob\_range={8.33088921e-01,8.36555126e-01},prob(percent)="83",prob+-sd="83+-0"]:1.834508e-04[&length\_mean=2.11172066e-04,length\_median=1.83450800e-04,length\_95%HPD={3.84145100e-07,4.83428700e-04}],141[&prob=1.00000000e+00,prob\_stddev=0.00000000e+00,prob\_range={1.00000000e+00,1.00000000e+00},prob(percent)="100",prob+-sd="100+-0"]:4.671839e-03[&length\_mean=4.71920065e-03,length\_median=4.67183900e-03,length\_95%HPD={3.60199300e-03,5.89637600e-03}][&prob=1.00000000e+00,prob\_stddev=0.00000000e+00,prob\_range={1.00000000e+00,1.00000000e+00},prob(percent)="100",prob+-sd="100+-0"]:1.348142e-03[&length\_mean=1.37290484e-03,length\_median=1.34814200e-03,length\_95%HPD={7.82944500e-04,2.05379500e-03}],(116[&prob=1.00000000e+00,prob\_stddev=0.00000000e+00,prob\_range={1.00000000e+00,1.00000000e+00},prob(percent)="100",prob+-sd="100+-0"]:1.458020e-03[&length\_mean=1.48453396e-03,length\_median=1.45802000e-03,length\_95%HPD={8.70097500e-04,2.15284400e-03}],117[&prob=1.00000000e+00,prob\_stddev=0.00000000e+00,prob\_range={1.00000000e+00,1.00000000e+00},prob(percent)="100",prob+-sd="100+-0"]:7.439017e-04[&length\_mean=7.67595689e-04,length\_median=7.43901700e-04,length\_95%HPD={3.26894100e-04,1.24050500e-03}][&prob=1.00000000e+00,prob\_stddev=0.00000000e+00,prob\_range={1.00000000e+00,1.00000000e+00},prob(percent)="100",prob+-sd="100+-0"]:4.173134e-03[&length\_mean=4.19994205e-03,length\_median=4.17313400e-03,length\_95%HPD={3.12066500e-03,5.40154900e-03}][&prob=1.00000000e+00,prob\_stddev=0.00000000e+00,prob\_range={1.00000000e+00,1.00000000e+00},prob(percent)="100",prob+-sd="100+-0"]:6.533469e-04[&length\_mean=6.84334108e-04,length\_median=6.53346900e-04,length\_95%HPD={2.04426500e-04,1.17634900e-03}],(118[&prob=1.00000000e+00,prob\_stddev=0.00000000e+00,prob\_range={1.00000000e+00,1.00000000e+00},prob(percent)="100",prob+-sd="100+-0"]:5.045028e-03[&length\_mean=5.06713432e-03,length\_median=5.04502800e-03,length\_95%HPD={3.85918900e-03,6.33414300e-03}],119[&prob=1.00000000e+00,prob\_stddev=0.00000000e+00,prob\_range={1.00000000e+00,1.00000000e+00},prob(percent)="100",prob+-sd="100+-0"]:4.502638e-03[&length\_mean=4.53840868e-03,length\_median=4.50263800e-03,length\_95%HPD={3.39948400e-03,5.72007200e-03}][&prob=9.99533396e-01,prob\_stddev=2.82805005e-04,prob\_range={9.99333422e-01,9.99733369e-01},prob(percent)="100",prob+-sd="100+-0"]:6.173325e-04[&length\_mean=6.42887358e-04,length\_median=6.17332500e-04,length\_95%HPD={2.00018200e-04,1.14415900e-03}][&prob=1.00000000e+00,prob\_stddev=0.00000000e+00,prob\_range={1.00000000e+00,1.00000000e+00},prob(percent)="100",prob+-sd="100+-0"]:4.701090e-03[&length\_mean=4.73715801e-



03,length\_median=6.17618600e-03,length\_95%HPD={4.80994800e-03,7.64667000e-03}][&prob=1.00000000e+00,prob\_stddev=0.00000000e+00,prob\_range={1.00000000e+00,1.00000000e+00},prob(percent)="100",prob+-sd="100+-0"]:1.429958e-03[&length\_mean=1.46300718e-03,length\_median=1.42995800e-03,length\_95%HPD={8.00704200e-04,2.17280400e-03}],187[&prob=1.00000000e+00,prob\_stddev=0.00000000e+00,prob\_range={1.00000000e+00,1.00000000e+00},prob(percent)="100",prob+-sd="100+-0"]:8.678302e-03[&length\_mean=8.69424149e-03,length\_median=8.67830200e-03,length\_95%HPD={7.00178500e-03,1.03467400e-02}][&prob=9.04679376e-01,prob\_stddev=3.58219673e-03,prob\_range={9.02146380e-01,9.07212372e-01},prob(percent)="90",prob+-sd="90+-0"]:3.881205e-04[&length\_mean=4.25123225e-04,length\_median=3.88120500e-04,length\_95%HPD={2.44811300e-05,8.71424600e-04}],(34[&prob=1.00000000e+00,prob\_stddev=0.00000000e+00,prob\_range={1.00000000e+00,1.00000000e+00},prob(percent)="100",prob+-sd="100+-0"]:6.353257e-03[&length\_mean=6.38209214e-03,length\_median=6.35325700e-03,length\_95%HPD={5.03653300e-03,7.85858100e-03}],94[&prob=1.00000000e+00,prob\_stddev=0.00000000e+00,prob\_range={1.00000000e+00,1.00000000e+00},prob(percent)="100",prob+-sd="100+-0"]:6.113691e-03[&length\_mean=6.12325734e-03,length\_median=6.11369100e-03,length\_95%HPD={4.78001600e-03,7.50759400e-03}][&prob=9.98666844e-01,prob\_stddev=3.77073340e-04,prob\_range={9.98400213e-01,9.98933476e-01},prob(percent)="100",prob+-sd="100+-0"]:9.875095e-04[&length\_mean=1.01420038e-03,length\_median=9.87509500e-04,length\_95%HPD={4.26056400e-04,1.69438200e-03}][&prob=1.00000000e+00,prob\_stddev=0.00000000e+00,prob\_range={1.00000000e+00,1.00000000e+00},prob(percent)="100",prob+-sd="100+-0"]:1.355587e-02[&length\_mean=1.35672903e-02,length\_median=1.35558700e-02,length\_95%HPD={1.11042900e-02,1.58331500e-02}],(192[&prob=1.00000000e+00,prob\_stddev=0.00000000e+00,prob\_range={1.00000000e+00,1.00000000e+00},prob(percent)="100",prob+-sd="100+-0"]:1.192990e-04[&length\_mean=1.45261806e-04,length\_median=1.19299000e-04,length\_95%HPD={4.31224100e-07,3.59549400e-04}],193[&prob=1.00000000e+00,prob\_stddev=0.00000000e+00,prob\_range={1.00000000e+00,1.00000000e+00},prob(percent)="100",prob+-sd="100+-0"]:1.979562e-04[&length\_mean=2.20959400e-04,length\_median=1.97956200e-04,length\_95%HPD={8.22944400e-06,4.76723600e-04}][&prob=1.00000000e+00,prob\_stddev=0.00000000e+00,prob\_range={1.00000000e+00,1.00000000e+00},prob(percent)="100",prob+-sd="100+-0"]:1.895467e-02[&length\_mean=1.89700569e-02,length\_median=1.89546700e-02,length\_95%HPD={1.55285600e-02,2.23357100e-02}][&prob=4.03746167e-01,prob\_stddev=2.53581821e-02,prob\_range={3.85815225e-01,4.21677110e-01},prob(percent)="40",prob+-sd="40+-3"]:7.265459e-04[&length\_mean=7.92450639e-04,length\_median=7.26545900e-04,length\_95%HPD={6.02201300e-08,1.65618200e-03}],(139[&prob=1.00000000e+00,prob\_stddev=0.00000000e+00,prob\_range={1.00000000e+00,1.00000000e+00},prob(percent)="100",prob+-sd="100+-0"]:2.149787e-02[&length\_mean=2.15440999e-02,length\_median=2.14978700e-02,length\_95%HPD={1.86790100e-02,2.46480200e-02}],(((214[&prob=1.00000000e+00,prob\_stddev=0.00000000e+00,prob\_range={1.00000000e+00,1.00000000e+00},prob(percent)="100",prob+-sd="100+-0"]:1.149754e-03[&length\_mean=1.18079721e-03,length\_median=1.14975400e-03,length\_95%HPD={6.11908000e-04,1.80112200e-03}],215[&prob=1.00000000e+00,prob\_stddev=0.00000000e+00,prob\_range={1.00000000e+00,1.00000000e+00},prob(percent)="100",prob+-sd="100+-0"]:1.277423e-03[&length\_mean=1.30455277e-03,length\_median=1.27742300e-03,length\_95%HPD={7.11233500e-04,1.91236800e-03}][&prob=1.00000000e+00,prob\_stddev=0.00000000e+00,prob\_range={1.00000000e+00,1.00000000e+00},prob(percent)="100",prob+-sd="100+-0"]:2.710060e-03[&length\_mean=2.72417496e-03,length\_median=2.71006000e-03,length\_95%HPD={1.79846300e-03,3.59544400e-03}],217[&prob=1.00000000e+00,prob\_stddev=0.00000000e+00,prob\_range={1.00000000e+00,1.00000000e+00},prob(percent)="100",prob+-sd="100+-0"]:2.059465e-03[&length\_mean=2.08056781e-03,length\_median=2.05946500e-03,length\_95%HPD={1.34565600e-03,2.90290800e-03}][&prob=1.00000000e+00,prob\_stddev=0.00000000e+00,prob\_range={1.00000000e+00,1.00000000e+00},prob(percent)="100",prob+-sd="100+-0"]:1.198404e-03[&length\_mean=1.22816270e-03,length\_median=1.19840400e-03,length\_95%HPD={5.87342600e-04,1.88507500e-03}],216[&prob=1.00000000e+00,prob\_stddev=0.00000000e+00,prob\_range={1.00000000e+00,1.00000000e+00},prob(percent)="100",prob+-sd="100+-0"]:4.381816e-03[&length\_mean=4.41544862e-03,length\_median=4.38181600e-03,length\_95%HPD={3.28457700e-03,5.67457000e-03}][&prob=1.00000000e+00,prob\_stddev=0.00000000e+00,prob\_range={1.00000000e+00,1.00000000e+00},prob(percent)="100",prob+-sd="100+-0"]:2.412662e-03[&length\_mean=2.44862990e-03,length\_median=2.41266200e-03,length\_95%HPD={1.46177600e-03,3.52136800e-03}],218[&prob=1.00000000e+00,prob\_stddev=0.00000000e+00,prob\_range={1.00000000e+00,1.00000000e+00},prob(percent)="100",prob+-sd="100+-0"]:6.127062e-03[&length\_mean=6.16111865e-

```
03,length_median=6.12706200e-03,length_95%HPD={4.71510000e-03,7.73459300e-
03}}[&prob=1.00000000e+00,prob_stddev=0.00000000e+00,prob_range={1.00000000e+00,1.00000000e+00
},prob(percent)="100",prob+-sd="100+-0"]:1.295179e-02[&length_mean=1.30038556e-
02,length_median=1.29517900e-02,length_95%HPD={1.06804300e-02,1.54069300e-
02}}[&prob=9.98200240e-01,prob_stddev=1.79109837e-03,prob_range={9.96933742e-01,9.99466738e-
01},prob(percent)="100",prob+-sd="100+-0"]:2.178575e-03[&length_mean=2.23145068e-
03,length_median=2.17857500e-03,length_95%HPD={1.07587600e-03,3.48974400e-
03}}[&prob=4.82602320e-01,prob_stddev=3.37480639e-02,prob_range={4.58738835e-01,5.06465805e-
01},prob(percent)="48",prob+-sd="48+-3"]:1.718053e-03[&length_mean=1.79531560e-
03,length_median=1.71805300e-03,length_95%HPD={1.43509800e-04,3.46890900e-
03}},144[&prob=1.00000000e+00,prob_stddev=0.00000000e+00,prob_range={1.00000000e+00,1.00000000e
+00},prob(percent)="100",prob+-sd="100+-0"]:1.325668e-02[&length_mean=1.32337491e-
02,length_median=1.32566800e-02,length_95%HPD={1.00817400e-02,1.59819600e-
02}}[&prob=1.00000000e+00,prob_stddev=0.00000000e+00,prob_range={1.00000000e+00,1.00000000e+00
},prob(percent)="100",prob+-sd="100+-0"]:5.858885e-02[&length_mean=5.87188373e-
02,length_median=5.85888500e-02,length_95%HPD={5.19559900e-02,6.51480400e-
02}}[&prob=1.00000000e+00,prob_stddev=0.00000000e+00,prob_range={1.00000000e+00,1.00000000e+00
},prob(percent)="100",prob+-sd="100+-0"]:1.216383e-02[&length_mean=1.22994295e-
02,length_median=1.21638300e-02,length_95%HPD={7.59731500e-03,1.70670300e-
02}}[&prob=1.00000000e+00,prob_stddev=0.00000000e+00,prob_range={1.00000000e+00,1.00000000e+00
},prob(percent)="100",prob+-sd="100+-0"]:3.142149e-02[&length_mean=3.15315280e-
02,length_median=3.14214900e-02,length_95%HPD={2.25854200e-02,4.04206400e-02}}];
end;
```
