# Supplementary material for: Evolutionary history of Carnivora (Mammalia, Laurasiatheria) inferred from mitochondrial genomes
Source: PubMed Central journal article supplement (PMC7886153; doi:10.1371/journal.pone.0240770), 2021-02-16

## **S8 Appendix. D-loop phylogeny of the species *Leopardus pardalis***

### **Evolutionary history of Carnivora (Mammalia, Laurasiatheria) inferred from mitochondrial genomes**

Alexandre Hassanin<sup>1\*</sup>, Géraldine Veron<sup>1</sup>, Anne Ropiquet<sup>2</sup>, Bettine Jansen van Vuuren<sup>3</sup>, Alexis Lécu<sup>4</sup>, Steven M. Goodman<sup>5</sup>, Jibrán Haider<sup>1,6,7</sup>, Trung Thanh Nguyen<sup>1</sup>

<sup>1</sup> Institut de Systématique, Évolution, Biodiversité (ISYEB), Sorbonne Université, MNHN, CNRS, EPHE, UA, Paris.

<sup>2</sup> Department of Natural Sciences, Faculty of Science and Technology, Middlesex University, United Kingdom.

<sup>3</sup> Centre for Ecological Genomics and Wildlife Conservation, Department of Zoology, University of Johannesburg, South Africa.

<sup>4</sup> Parc zoologique de Paris, Muséum national d'Histoire naturelle, Paris.

<sup>5</sup> Field Museum of Natural History, Chicago, IL, USA.

<sup>6</sup> Department of Wildlife Management, Pir Mehr Ali Shah, Arid Agriculture University Rawalpindi, Pakistan.

<sup>7</sup> Forest Parks & Wildlife Department Gilgit-Baltistan, Pakistan.

\* Correspondence: [alexandre.hassanin@mnhn.fr](mailto:alexandre.hassanin@mnhn.fr)

Nexus Dloop data set: DIMENSIONS NTAX=53 NCHAR=403  
 Method: neighbor-joining search  
 Number of bootstrap replicates = 1000

Bootstrap 50% majority-rule consensus tree

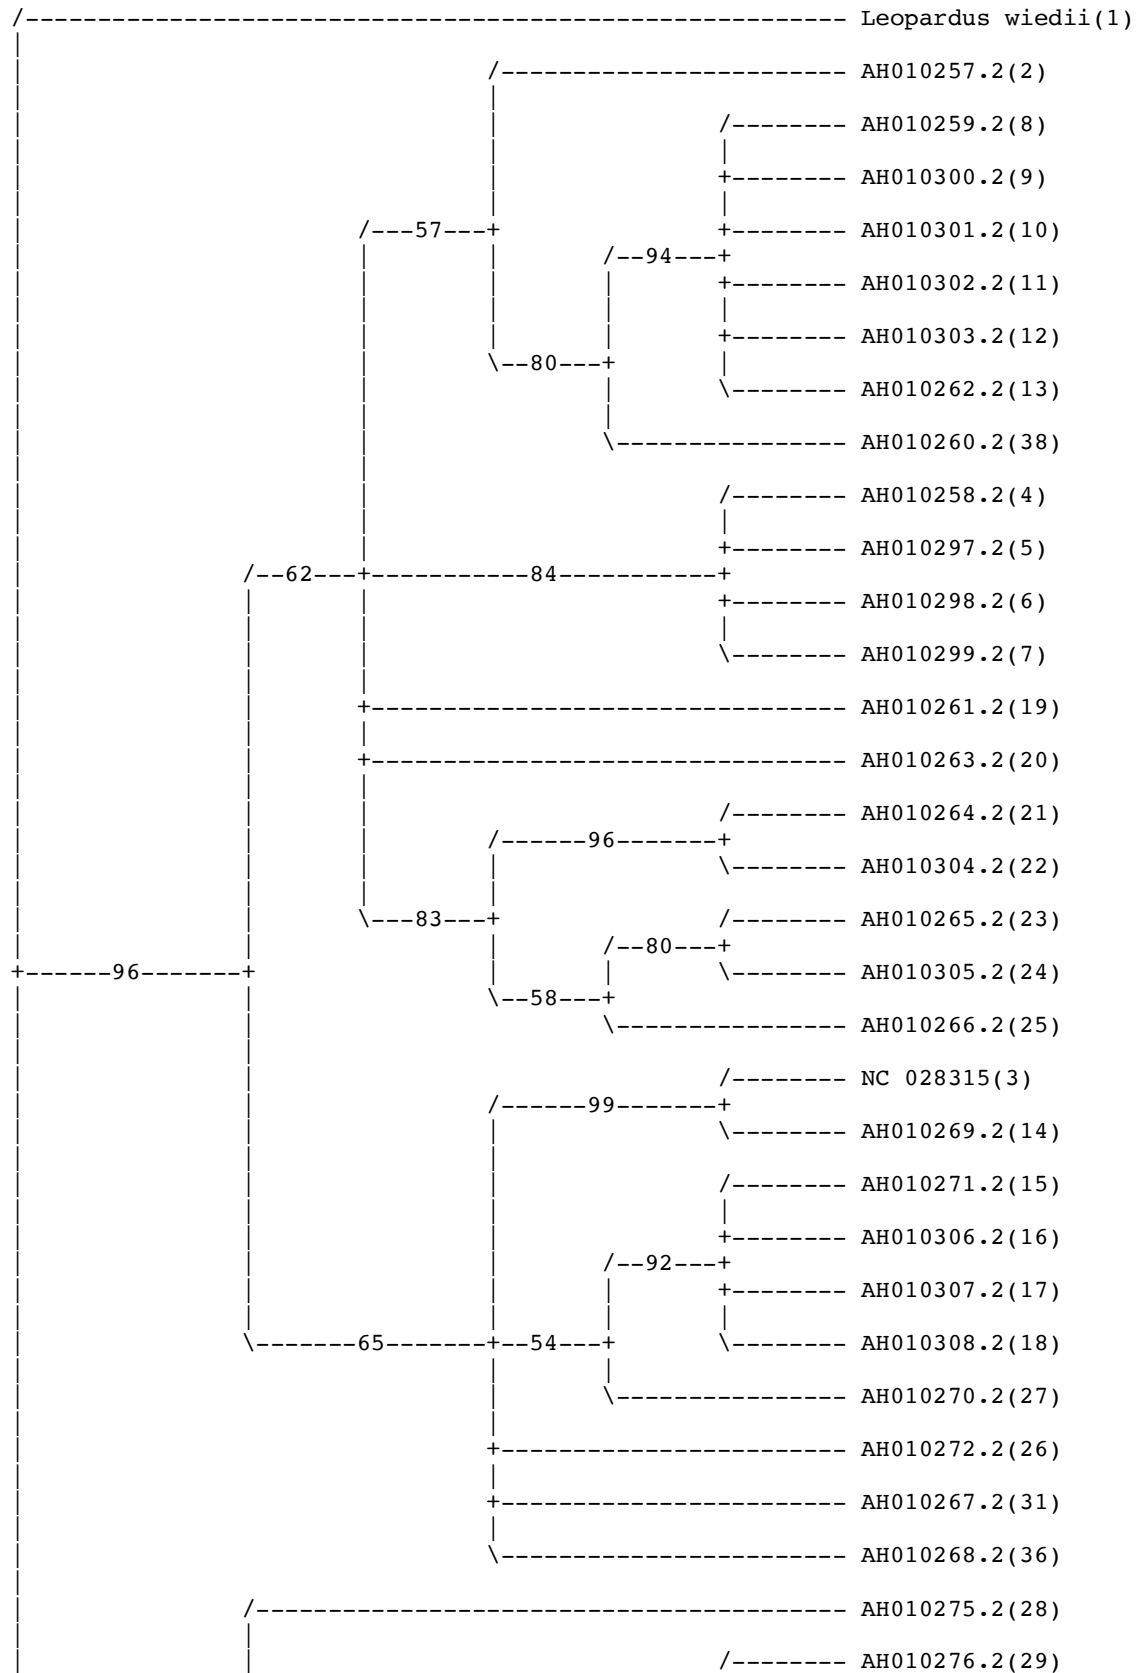

Supplement: pone.0240770.s008.pdf [file pone.0240770.s008.pdf]
